# Supplementary material for: MorphoCellSorter is an Andrews plot-based sorting approach to rank microglia according to their morphological features
Source: eLife. 2025 May 19;13:RP101630. doi: 10.7554/eLife.101630 (PMC12088675; doi:10.7554/eLife.101630)
Supplement: Figure 4—source data 1. [file elife-101630-fig4-data1.xlsx]

## Sheet: Parameters
microglia	PerimeterAreaRatio	ModifiedCircularity	RoundnessFactor	RamificationIndex	Solidity	Convexity	ConvexHullRadiiRatio	SpanRatio	ConvexHullCircularity	ProcessesSomaAreasRatio	ProcessesCellAreasRatio	Density	BranchingIndex	EndpointsBranchpointsRatio	SkeletonProcessesRatio	FractalDimension	LacunaritySlope	PolarizationIndex	Linearity	Inertia
M001_MAX_iba1-555_rat-W5-r11_EL_acq1	3.82853	0.0431859	0.0384824	23.1557	0.26061	12.4449	1.39737	1.22829	1.05278	22.531	0.957503	0.0590889	5.31	0.833333	719.441	1.47233	0.00848925	0.322761	1.53493	1.88915
M001_MAX_iba1-555_rat-W5-r11_contro_TRANCHE3_acq1.czi - C=0-1	3.61581	0.0551698	0.0565493	18.1259	0.238655	9.53719	1.38103	1.21154	1.07705	14.8634	0.936962	0.0322556	1.73667	0.728155	489.601	1.36446	0.00457958	0.117383	1.56615	1.938
M002_MAX_iba1-555_rat-W5-r11_EL_acq1	3.75272	0.0471243	0.0460658	21.2205	0.312215	11.9704	1.67508	1.40147	1.00955	22.5819	0.957595	0.0463778	1.805	0.681081	652.546	1.4163	0.00728419	0.0978935	1.71267	2.29284
M002_MAX_iba1-555_rat-W5-r11_contro_TRANCHE3_acq1.czi - C=0-1	3.60586	0.0558051	0.0669288	17.9195	0.245462	9.74	1.50775	1.36059	1.09709	11.5217	0.920139	0.032	1.76833	0.633333	514.802	1.34846	0.00451207	0.401386	2.33846	2.33847
M003_MAX_iba1-555_rat-W5-r11_EL_acq2.czi - C=0	3.75727	0.0468779	0.0539973	21.332	0.308186	11.7215	1.54459	1.23917	0.989794	18.984	0.94996	0.0555111	1.60667	0.669903	728.951	1.45392	0.00849839	0.192431	1.30658	2.03453
M003_MAX_iba1-555_rat-W5-r11_contro_TRANCHE3_acq1.czi - C=0-1	3.71053	0.0494698	0.0591623	20.2143	0.19392	9.43694	1.3666	1.07263	1.06013	11.5238	0.920152	0.0379889	3.225	0.981481	556.366	1.38953	0.00513956	0.261053	1.1125	1.88192
M004_MAX_iba1-555_rat-W5-r11_EL_acq2.czi - C=0	3.80215	0.0445172	0.0444368	22.4632	0.203999	10.9682	1.65562	1.31653	1.08106	16.8301	0.943915	0.0408111	2.23667	1.13333	597.266	1.40436	0.00539013	0.0660008	1.66483	2.18389
M004_MAX_iba1-555_rat-W5-r11_contro_TRANCHE3_acq2.czi - C=0-2	3.4114	0.0698081	0.0649535	14.325	0.225169	6.68966	2.28663	1.84844	0.984137	7.33019	0.879955	0.0196222	1.41667	1.23529	254.595	1.26433	0.00277471	0.11898	4.31385	5.08436
M005_MAX_iba1-555_rat-W5-r11_EL_acq2.czi - C=0	3.82141	0.043541	0.0427819	22.9668	0.274616	13.2069	1.35022	1.08015	1.09733	26.9104	0.964171	0.0415556	2.12833	0.846995	816.599	1.41394	0.00579024	0.0880569	1.16922	1.42703
M005_MAX_iba1-555_rat-W5-r11_contro_TRANCHE3_acq2.czi - C=0-2	3.6611	0.0523667	0.0267416	19.0961	0.224543	8.86801	1.7047	1.33938	0.980011	22.1689	0.956839	0.0381	2.93167	0.761538	554.648	1.37933	0.00551995	0.174154	1.45772	3.11445
M006_MAX_iba1-555_rat-W5-r11_EL_acq3.czi - C=0-2	3.84126	0.0425572	0.0599268	23.4978	0.264226	12.3133	1.66112	1.35097	1.01944	14.5263	0.935593	0.0491667	3.47667	0.877778	732.145	1.43363	0.00700687	0.106299	1.51591	2.06869
M006_MAX_iba1-555_rat-W5-r11_contro_TRANCHE3_acq3.czi - C=0-3	3.57238	0.0579982	0.0516459	17.2419	0.215859	8.1359	2.00673	1.46602	1.01563	11.1946	0.917996	0.0299444	1.89833	1.04464	542.959	1.34529	0.00401029	0.245176	3.19518	3.2771
M007_MAX_iba1-555_rat-W5-r11_EL_acq3.czi - C=0-2	3.81279	0.0439754	0.0331948	22.74	0.261451	12.9758	1.33008	1.18425	1.11596	29.2109	0.966899	0.0493444	2.93667	0.915663	730.424	1.44103	0.00680467	0.16777	1.54454	1.67325
M007_MAX_iba1-555_rat-W5-r11_contro_TRANCHE3_acq3.czi - C=0-3	3.56257	0.0586568	0.0398379	17.0483	0.20029	8.38482	1.59049	1.31068	1.09896	19.4766	0.951164	0.0291222	1.845	0.865169	443.081	1.33065	0.00397808	0.303232	1.71484	1.73824
M008_MAX_iba1-555_rat-W5-r11_EL_acq4.czi - C=0-1	3.60573	0.0558137	0.0694593	17.9167	0.226882	8.48232	1.59924	1.26714	0.993931	11.3216	0.918842	0.0310778	1.53333	1.38889	388.327	1.35102	0.00418411	0.119587	1.60112	1.66473
M008_MAX_iba1-555_rat-W5-r11_contro_TRANCHE3_acq3.czi - C=0-3	3.35178	0.0747675	0.070349	13.3748	0.287173	7.5	1.88723	1.42984	1.04641	13.6555	0.931766	0.0193778	0.696667	0.558442	275.422	1.25224	0.00297056	0.227168	1.90247	2.13547
M009_MAX_iba1-555_rat-W5-r11_EL_acq4.czi - C=0-2	3.53107	0.0608231	0.117576	16.4411	0.236257	7.84115	1.74133	1.1504	0.981195	6.96716	0.874485	0.0296556	1.08667	1.43077	346.273	1.33799	0.00416941	0.136871	1.02172	1.57735
M009_MAX_iba1-555_rat-W5-r11_contro_TRANCHE3_acq4.czi - C=0-1	3.66727	0.0519961	0.0723345	19.2322	0.256383	9.91644	1.64317	1.40467	1.01831	11.1841	0.917926	0.0323556	1.54167	0.865546	540.518	1.35139	0.00458763	0.165748	1.67478	2.23231
M010_AX_iba1-555_rat-W5-r11_EL_acq4.czi - C=0-3	3.50598	0.0626059	0.109336	15.9729	0.261467	8.13441	1.78433	1.25431	0.99594	7.98113	0.888655	0.0317333	1.23	0.711111	368.435	1.34297	0.00481037	0.136226	1.19731	1.59463
M010_MAX_iba1-555_rat-W5-r11_contro_TRANCHE3_cq5.czi - C=0-3	3.47666	0.0647556	0.0485363	15.4427	0.195609	6.29688	2.23969	1.4852	0.921952	12.363	0.925167	0.0216778	1.86167	1.22	333.616	1.27712	0.00270558	0.384876	1.09782	1.9808
M011_MAX_iba1-555_rat-W5-r11_EL_acq5.czi - C=0-1	3.58047	0.0574605	0.0350787	17.4032	0.196989	7.96923	1.69525	1.42395	1.03173	17.1286	0.944838	0.0282	2.12333	1.18667	401.318	1.33608	0.00362643	0.362223	1.16628	2.2379
M011_MAX_iba1-555_rat-W5-r11_contro_TRANCHE3_acq5.czi - C=0-3	3.8561	0.0418367	0.0298567	23.9025	0.245366	12.192	1.42568	1.23069	1.02973	31.1491	0.968895	0.0575111	3.85	0.723618	800.801	1.46437	0.00799276	0.242746	1.52631	1.55206
M012_MAX_iba1-555_rat-W5-r11_EL_acq5.czi - C=0-2	3.64538	0.0533228	0.0580061	18.7537	0.21624	8.72263	1.78562	1.30061	1.00021	13.1854	0.929505	0.0323111	2.075	0.819149	447.651	1.35487	0.0044373	0.131126	1.54591	1.79111
M012_MAX_iba1-555_rat-W5-r11_contro_TRANCHE3_acq5.czi - C=0-3	3.67213	0.0517058	0.0619829	19.3402	0.221156	9.15473	1.666	1.33073	1.00655	12.1098	0.923721	0.0371444	2.155	0.719424	572.83	1.37454	0.00541906	0.244595	1.33458	2.48107
M013_MAX_iba1-555_rat-W5-r11_EL_acq5.czi - C=0-3	3.37553	0.072751	0.157088	13.7455	0.288883	7.99301	1.36478	1.15539	1.0819	7.24345	0.878692	0.0244556	0.811667	0.653846	295.52	1.30665	0.00388642	0.171849	1.54392	1.54998
M013_MAX_iba1-555_rat-W5-r11_contro_TRANCHE3_acq7.czi - C=0-1	3.60555	0.055825	0.0532064	17.9131	0.245368	9.38919	1.8884	1.64187	1.05815	13.3894	0.930505	0.0332556	2.58667	1.10256	395.871	1.36782	0.00488852	0.26362	2.59832	2.8547
M014_MAX_iba1-555_rat-W5-r11_EL_acq6.czi - C=0-1	3.62158	0.0548042	0.0388393	18.2468	0.207494	8.40049	1.85909	1.6147	1.01068	17.1203	0.944813	0.0318111	1.93333	1.8375	440.03	1.36699	0.00411209	0.0747566	2.7104	2.72387
M014_MAX_iba1-555_rat-W5-r11_contro_TRANCHE3_acq6.czi - C=0-2	3.49106	0.0636907	0.0549748	15.7009	0.219703	7.37978	1.88851	1.58341	1.00277	11.8689	0.922293	0.0261667	1.24667	0.964912	346.88	1.30622	0.00367806	0.194401	2.55676	2.7256
M015_MAX_iba1-555_rat-W5-r11_EL_acq7.czi - C=0-1	3.60967	0.0555611	0.0826412	17.9982	0.216226	8.98724	1.43742	1.13299	1.07385	9.40614	0.903903	0.0338778	2.005	1	465.78	1.3638	0.00480224	0.257393	1.48952	1.55706
M015_MAX_iba1-555_rat-W5-r11_contro_TRANCHE3_acq6.czi - C=0-2	3.73331	0.048189	0.0482383	20.7516	0.202259	9.21199	2.00247	1.36613	0.987068	15.3636	0.938889	0.038	1.82667	0.902439	550.888	1.38271	0.00522382	0.208728	1.57517	1.60095
M016_MAX_iba1-555_rat-W5-r11_EL_acq7.czi - C=0-2	3.52495	0.0612535	0.0835382	16.3256	0.222782	7.42105	1.57596	1.17049	0.963066	9.1162	0.901149	0.0319222	1.73167	1.24	381.628	1.34667	0.004451	0.200938	1.48438	1.66545
M016_MAX_iba1-555_rat-W5-r11_contro_TRANCHE3_acq9.czi - C=0-1	3.53565	0.0605033	0.0562968	16.528	0.193694	7.42547	1.38802	1.08961	1.02081	13.58	0.931413	0.0243	1.24167	1.6	337.379	1.29523	0.00320078	0.172398	1.11577	1.28519
M017_MAX_iba1-555_rat-W5-r11_EL_acq7.czi - C=0-3	3.68353	0.0510317	0.0502463	19.5957	0.214794	8.45415	1.85768	1.18279	0.930891	19.0452	0.950113	0.0345222	2.38667	0.857143	551.55	1.36761	0.00466059	0.289834	1.22332	1.29564
M017_MAX_iba1-555_rat-W5-r11_contro_TRANCHE3_acq11.czi - C=0-1	3.61048	0.0555095	0.0268646	18.0149	0.237998	9.12997	1.92306	1.7576	1.03884	24.708	0.961102	0.0322778	2.60167	0.864078	452.499	1.3522	0.00458341	0.112857	3.39792	3.40008
M018_MAX_iba1-555_rat-W5-r11_EL_acq8.czi - C=0-2	3.56098	0.0587643	0.0629005	17.0171	0.244424	9.44904	1.37044	1.05456	1.12313	15.4112	0.939066	0.0359222	1.79667	0.764706	365.914	1.37236	0.00533651	0.186955	1.43668	1.58482
M018_MAX_iba1-555_rat-W5-r11_contro_TRANCHE3_acq13.czi - C=0-5	3.57211	0.0580162	0.0493124	17.2366	0.236954	8.8318	1.64909	1.33555	1.05261	16.0534	0.941361	0.0248222	1.74167	0.741935	404.224	1.29842	0.00340401	0.26762	1.66221	2.02938
M019_MAX_iba1-555_rat-W5-r11_EL_acq8.czi - C=0-1	3.56561	0.0584522	0.0482364	17.108	0.258555	9.47664	1.78772	1.49465	1.08938	16	0.941176	0.0279556	1.09333	1.14286	357.432	1.33646	0.00393217	0.127655	2.12992	2.40432
M019_MAX_iba1-555_rat-W5-r11_contro_TRANCHE3_acq13.czi - C=0-5	3.63948	0.0536865	0.0595663	18.6267	0.312494	10.6456	1.66837	1.45737	1.02238	15.4	0.939024	0.0382667	1.46167	0.468927	625.258	1.37562	0.00595035	0.0702575	1.63808	2.70754
M020_MAX_iba1-555_rat-W5-r11_EL_acq9.czi - C=0-1	3.32958	0.0767034	0.124434	13.0372	0.324436	7.56981	1.75712	1.41239	1.01938	7.6422	0.884289	0.0209333	0.913333	0.94	229.989	1.26147	0.00332371	0.206065	1.50477	2.59851
M020_MAX_iba1-555_rat-W5-r11_contro_TRANCHE3_acq13.czi - C=0-5	3.63067	0.0542339	0.0934544	18.4386	0.264665	9.91489	1.59074	1.12214	1.04523	12.17	0.92407	0.0361444	1.83167	0.540146	563.94	1.36775	0.0052775	0.214018	1.07178	1.0994
M021_MAX_iba1-555_rat-W5-r11_EL_acq9.czi - C=0-2	3.52148	0.0614982	0.0874017	16.2606	0.236505	8.67213	1.44454	1.20034	1.09665	10.1882	0.91062	0.0336889	1.09167	0.922078	311.91	1.3498	0.00508659	0.203044	1.26241	1.68426
M021_MAX_iba1-555_rat-W5-r11_contro_TRANCHE3_acq13.czi - C=0-5	3.54251	0.0600275	0.0795695	16.659	0.259941	9.26531	1.41721	1.20492	1.09087	11.8142	0.921961	0.0321778	1.57667	0.74	398.113	1.34555	0.00483474	0.232836	1.80879	1.80907
M022_MAX_iba1-555_rat-W5-r11_EL_acq9.czi - C=0-3	3.46918	0.0653154	0.0692333	15.3103	0.224565	7.24438	2.14335	1.91506	0.998495	7.78599	0.886182	0.0250889	1.27333	1.16129	294.765	1.30247	0.00361913	0.105222	4.12018	4.12046
M022_MAX_iba1-555_rat-W5-r11_contro_TRANCHE3_acq13.czi - C=0-5	3.7894	0.0451755	0.0277733	22.1359	0.250381	11.9322	1.88341	1.71059	1.07727	22.3373	0.95715	0.0438222	3.21667	0.61809	728.202	1.35577	0.00626869	0.356055	3.23716	3.54317
M023_MAX_iba1-555_rat-W5-r11_EL_tranche2_acq1-1	3.60395	0.0559279	0.0944596	17.8802	0.247833	8.68342	1.7834	1.49434	0.975529	10.751	0.914901	0.0330333	1.09167	1.33784	353.088	1.35457	0.00481565	0.115993	1.0247	1.73111
M023_MAX_iba1-555_rat-W5-r11_contro_TRANCHE3_acq14.czi - C=0-2-1	3.66752	0.0519811	0.0682587	19.2378	0.30882	11.7514	1.50241	1.27921	1.09921	17.3937	0.945633	0.0451667	2.505	0.482558	618.565	1.40806	0.00726863	0.257244	1.40949	1.63933
M024_MAX_iba1-555_rat-W5-r11_EL_tranche2_acq1-3	3.62857	0.0543653	0.0562146	18.3941	0.305302	10.7507	1.43479	1.21418	1.05778	20.3613	0.953186	0.0367889	1.77667	0.768519	437.46	1.3723	0.00556109	0.088615	1.69896	1.69896
M024_MAX_iba1-555_rat-W5-r11_contro_TRANCHE3_acq14.czi - C=0-2-1	3.57201	0.0580226	0.0389796	17.2347	0.267194	8.82564	1.91408	1.30507	0.990673	21.5106	0.955577	0.0352667	2.43333	0.489655	527.605	1.35874	0.00518398	0.19845	1.64369	2.02007
M025_MAX_iba1-555_rat-W5-r11_EL_tranche2_acq1-2	3.56045	0.0588002	0.0396241	17.0067	0.214362	7.9383	1.69315	1.39382	1.00817	16.6498	0.943342	0.0425556	3.075	0.942857	469.917	1.41482	0.00619608	0.399085	2.24022	2.39115
M025_MAX_iba1-555_rat-W5-r11_contro_TRANCHE3_acq15.czi - C=0-4	3.61864	0.05499	0.0762038	18.1851	0.292826	10.5195	1.39156	1.14809	1.06899	18.1602	0.947808	0.0438556	2.75167	0.581395	600.642	1.4036	0.00681393	0.191668	1.0883	1.08847
M026_MAX_iba1-555_rat-W5-r11_EL_tranche2_acq4-2	3.54029	0.0601813	0.0772468	16.6164	0.291703	9.53666	1.58428	1.43172	1.06264	12.0256	0.923228	0.0338667	1.55333	1.81967	310.67	1.3562	0.00510408	0.236166	1.2645	2.23848
M026_MAX_iba1-555_rat-W5-r11_contro_TRANCHE3_acq15.czi - C=0-4	3.67535	0.0515147	0.0606303	19.412	0.254647	10.368	1.37641	1.17434	1.05841	13.7538	0.932221	0.0319667	1.81667	0.747826	517.406	1.34529	0.00455736	0.266936	1.36425	2.38853
M027_MAX_iba1-555_rat-W5-r11_EL_tranche2_acq4-2	3.83562	0.0428348	0.0316453	23.3455	0.236587	12.2423	1.46723	1.21714	1.07811	31.4375	0.969171	0.0576667	3.63167	1.1747	666.513	1.4654	0.00802164	0.198744	1.44895	1.49859
M027_MAX_iba1-555_rat-W5-r11_contro_TRANCHE3_acq15.czi - C=0-4	3.5531	0.0593	0.104712	16.8634	0.238675	8.76524	1.4799	1.04048	1.06394	9.23451	0.902291	0.0257	1.295	0.648352	375.287	1.30305	0.0036653	0.167637	1.00923	1.13212
M028_MAX_iba1-555_rat-W5-r11_EL_tranche2_acq5-2	3.74544	0.0475207	0.0611467	21.0435	0.272397	11.9169	1.35596	1.21741	1.08504	18.1435	0.947763	0.0474333	2.665	0.701149	622.484	1.42478	0.0070369	0.227527	1.46782	1.48111
M028_MAX_iba1-555_rat-W5-r11_contro_TRANCHE3_acq15.czi - C=0-4	3.75375	0.0470683	0.0534959	21.2457	0.279904	12.3016	1.51054	1.25672	1.09443	19.1844	0.950457	0.0401444	2.34167	0.607955	657.836	1.39249	0.00580858	0.263049	1.64892	1.65085
M029_MAX_iba1-555_rat-W5-r11_EL_tranche2_acq5-2	3.56293	0.0586325	0.0651662	17.0554	0.293581	9.73968	1.62887	1.26219	1.05395	14.512	0.935534	0.0286111	1.58	0.724138	385.76	1.33216	0.00417863	0.350866	1.89098	1.89394
M029_MAX_iba1-555_rat-W5-r11_contro_TRANCHE3_acq16.czi - C=0-5	3.53852	0.0603041	0.0420995	16.5826	0.187289	7.30789	1.7228	1.27144	1.01832	16.9474	0.944282	0.0265222	1.56	0.727273	379.603	1.30746	0.0038592	0.110223	2.32985	2.3386
M030_MAX_iba1-555_rat-W5-r11_EL_tranche2_acq6-1	3.40367	0.0704318	0.0481666	14.1981	0.195271	6.43137	1.84198	1.36067	1.02507	10.1283	0.910139	0.0231222	1.97167	0.967213	269.164	1.28703	0.00324995	0.133341	1.77246	2.78014
M030_MAX_iba1-555_rat-W5-r11_contro_TRANCHE3_acq16.czi - C=0-5	3.66372	0.0522092	0.0863902	19.1537	0.257099	10.0429	1.47074	1.26521	1.03408	11.7619	0.921642	0.0297778	1.715	0.851485	470.479	1.34012	0.0041423	0.247374	1.08654	1.44582
M031_MAX_iba1-555_rat-W5-r11_EL_tranche2_acq6-2	3.55757	0.0589953	0.0873221	16.9505	0.232907	8.5013	1.60548	1.44609	1.03923	8.01824	0.889114	0.0329667	1.07667	1.13043	398.266	1.3613	0.00471695	0.0410512	1.7765	2.67231
M031_MAX_iba1-555_rat-W5-r11_contro_TRANCHE3_acq16.czi - C=0-5	3.69134	0.0505751	0.0577702	19.7726	0.275601	10.863	1.33027	1.0743	1.04652	20.0526	0.9525	0.0355556	2.33667	0.603175	568.194	1.36572	0.00498134	0.553399	1.06833	1.16763
M032_MAX_iba1-555_rat-W5-r11_EL_tranche2_acq6-3	3.51546	0.0619263	0.0628137	16.1482	0.259535	8.03252	1.89873	1.51274	0.976402	11.3548	0.91906	0.0297889	1.39833	1.07143	364.734	1.32802	0.00450044	0.155707	3.1429	3.54063
M032_MAX_iba1-555_rat-W5-r11_contro_TRANCHE3_acq16.czi - C=0-5	3.51536	0.0619333	0.0744969	16.1464	0.257561	8.11047	1.52645	1.22766	0.989759	12.7341	0.927189	0.0264	1.54333	0.747253	391.757	1.30641	0.00382006	0.160229	1.37535	1.64193
M033_MAX_iba1-555_rat-W5-r11_EL_tranche2_acq6-4	3.36014	0.0740515	0.128207	13.5041	0.343401	7.51333	1.98402	1.34323	0.949435	7.79762	0.886333	0.0246333	0.645	0.701493	220.338	1.30619	0.00411806	0.067161	1.11819	2.30755
M033_MAX_iba1-555_rat-W5-r11_contro_TRANCHE3_acq16.czi - C=0-5	3.62727	0.0544468	0.0471932	18.3666	0.30945	10.7893	1.26252	1.10315	1.05602	28.2316	0.96579	0.0308556	1.33833	0.601307	581.656	1.3419	0.0046563	0.198119	1.46917	1.4696
M034_MAX_iba1-555_rat-W5-r11_EL_tranche2_acq7-1	3.5524	0.0593481	0.0631645	16.8497	0.252012	8.61719	1.88171	1.56598	1.01874	12.3435	0.925057	0.0341	1.715	0.941176	392.792	1.3555	0.00502698	0.162459	1.51264	2.54332
M034_MAX_iba1-555_rat-W5-r11_contro_TRANCHE3_acq17.czi - C=0-2-1	3.62549	0.054558	0.106489	18.3291	0.294534	10.4601	1.48422	1.09701	1.05154	11.6345	0.920852	0.0407111	1.41833	0.664596	600.157	1.39614	0.0064748	0.115643	1.10638	1.35468
M035_MAX_iba1-555_rat-W5-r11_EL_tranche2_acq7-1	3.5818	0.0573728	0.142325	17.4299	0.27742	8.78519	1.66485	1.26953	0.956948	8.69591	0.896864	0.0368444	1.81667	0.652893	443.914	1.3634	0.0059472	0.367973	1.10996	1.21954
M035_MAX_iba1-555_rat-W5-r11_contro_TRANCHE3_acq17.czi - C=0-2-1	3.70983	0.0495097	0.104342	20.1981	0.248504	11.1658	1.33584	1.0211	1.10895	11.9308	0.922665	0.0415222	2.32667	0.875	560.354	1.40178	0.00623451	0.11909	1.01227	1.03357
M036_MAX_iba1-555_rat-W5-r11_EL_tranche2_acq7-1	3.42497	0.0687258	0.117916	14.5506	0.314662	8.01667	1.93334	1.30844	0.98218	8.57709	0.895584	0.0241556	0.94	1.02857	272.954	1.31431	0.00380952	0.107236	1.13347	2.01706
M036_MAX_iba1-555_rat-W5-r11_contro_TRANCHE3_acq18.czi - C=0-1	3.74064	0.0477843	0.0333269	20.9274	0.276907	11.6442	1.54191	1.31404	1.05737	27.2583	0.964612	0.0376778	1.28667	0.78169	588.129	1.38281	0.00537066	0.0383991	1.12672	2.2669
M037_MAX_iba1-555_rat-W5-r11_EL_tranche2_acq7-1	3.50875	0.0624065	0.124061	16.024	0.282961	9.09317	1.71788	1.30853	1.0668	7.57097	0.883327	0.0295222	0.891667	1.35294	348.196	1.33572	0.00448709	0.15152	1.2961	1.99668
M037_MAX_iba1-555_rat-W5-r11_contro_TRANCHE3_acq19.czi - C=0-2	3.75964	0.0467506	0.0254422	21.3901	0.211297	9.72222	2.17357	1.8276	0.988794	19.224	0.950554	0.0431444	3.675	0.902778	626.779	1.40578	0.00595982	0.143536	1.42959	3.9995
M038_MAX_iba1-555_rat-W5-r11_EL_tranche2_acq8-1	3.73749	0.0479581	0.0346723	20.8515	0.180917	8.50284	1.97282	1.5664	0.958709	13.9315	0.933027	0.0411444	3.93	1.37615	575.427	1.40337	0.00534108	0.116201	3.52757	3.57376
M038_MAX_iba1-555_rat-W5-r11_contro_TRANCHE3_acq19.czi - C=0-2	3.64215	0.0535215	0.0327904	18.6841	0.232714	9.21324	1.8706	1.5934	1.02218	20.0523	0.952499	0.0357889	2.31	0.596774	512.554	1.37103	0.00511386	0.212172	2.90424	3.26241
M039_MAX_iba1-555_rat-W5-r11_EL_tranche2_acq8-1	3.68605	0.0508836	0.0409261	19.6527	0.222337	9.58838	1.39377	1.27106	1.03471	19.1938	0.95048	0.0359	2.11833	1.22917	451.1	1.37213	0.00507571	0.211844	2.24035	2.24149
M039_MAX_iba1-555_rat-W5-r11_contro_TRANCHE3_acq20.czi - C=0-2	3.81152	0.04404	0.0400996	22.7066	0.236317	11.4246	1.7647	1.46929	1.035	18.7743	0.949429	0.0496556	3.10833	1.09774	735.036	1.44016	0.00689893	0.269672	1.09259	2.5208
M040_MAX_iba1-555_rat-W5-r11_EL_tranche2_acq8-1	3.59246	0.056673	0.0592566	17.6451	0.216951	8.22532	1.94086	1.51999	1.0008	10.9911	0.916605	0.0299778	2.41667	1.45455	348.985	1.3462	0.00403706	0.311028	1.8571	2.55386
M040_MAX_iba1-555_rat-W5-r11_contro_TRANCHE3_acq20.czi - C=0-2	3.72017	0.0489237	0.0305883	20.44	0.209371	10.5515	1.68579	1.25565	1.12817	25.9466	0.96289	0.0392222	2.09667	0.714286	589.063	1.39553	0.00556657	0.15148	1.61797	1.70984
M041_MAX_iba1-555_rat-W5-r11_EL_tranche2_acq9-1	3.67169	0.0517322	0.0435236	19.3303	0.253988	10.0429	1.84851	1.44045	1.03089	17.3932	0.945632	0.0421	2.57167	0.857143	535.368	1.39796	0.0062501	0.211194	1.15313	2.6802
M041_MAX_iba1-555_rat-W5-r11_contro_TRANCHE3_acq21.czi - C=0-2	3.71793	0.0490501	0.0376514	20.3873	0.192985	9.86183	1.40344	1.20979	1.10112	21.6333	0.955817	0.0377222	2.75667	1.15574	649.708	1.38969	0.00489678	0.100074	1.53698	1.54964
M042_MAX_iba1-555_rat-W5-r11_EL_tranche2_acq10	3.75506	0.0469977	0.0426633	21.2776	0.207528	10.782	1.35789	1.10685	1.11234	16.9724	0.944359	0.0361444	2.065	1.58511	500.521	1.38666	0.00456825	0.0876654	1.67907	1.73752
M042_MAX_iba1-555_rat-W5-r11_contro_TRANCHE3_acq21.czi - C=0-2	3.76522	0.0464511	0.0538922	21.528	0.198974	11.1614	1.44297	1.19156	1.1623	14.2231	0.934311	0.0409333	2.87667	1.03731	677.434	1.40519	0.00551102	0.199075	1.06899	1.47752
M043_MAX_iba1-555_rat-W5-r11_EL_tranche2_acq10	3.60261	0.0560145	0.0594778	17.8525	0.230501	8.8396	1.7071	1.30966	1.03133	13.1826	0.929491	0.0345111	2.42	1.13924	426.775	1.36864	0.0048741	0.308706	1.17007	1.73593
M043_MAX_iba1-555_rat-W5-r11_contro_TRANCHE3_acq22.czi - C=0-2	3.79474	0.0448989	0.0549696	22.2723	0.247331	11.8998	1.49149	1.13515	1.07432	17.2692	0.945263	0.0422222	2.71833	0.742331	684.472	1.40527	0.00608326	0.205196	1.19351	1.75167
M044_MAX_iba1-555_rat-W5-r11_EL_TRANCHE3_EL_acq22.czi - C=0-1	3.65987	0.0524406	0.0429104	19.0692	0.229794	9.19524	1.58585	1.16756	1.00591	21.9859	0.956495	0.0362667	2.30167	0.861386	469.738	1.37238	0.00509091	0.141118	1.20728	1.24912
M044_MAX_iba1-555_rat-W5-r11_EL_tranche2_acq10	3.70358	0.0498672	0.0551247	20.0533	0.260136	10.5679	1.45272	1.15083	1.03325	20.1988	0.952828	0.0402778	2.645	0.811024	560.991	1.3943	0.005835	0.290065	1.21729	1.44355
M045_MAX_iba1-555_rat-W5-r11_EL_tranche2_acq11-3	3.57655	0.0577202	0.115219	17.3249	0.303156	9.35326	1.51744	1.19658	0.980523	10.6333	0.91404	0.0349	1.395	0.849558	426.837	1.36075	0.00550629	0.0535288	1.10399	1.37878
M045_MAX_iba1-555_rat-W5-r11_contro_TRANCHE3_acq23.czi - C=0-3	3.56781	0.058304	0.0911962	17.1515	0.238332	8.14251	1.71175	1.16407	0.972447	11.1502	0.917697	0.0341556	1.4	0.834862	454.245	1.36119	0.00501059	0.109711	1.23851	1.28585
M046_MAX_iba1-555_rat-W5-r11_EL_tranche2_acq11-3	3.68671	0.0508451	0.0560195	19.6676	0.233251	10.0652	1.61978	1.3634	1.05964	13.5526	0.931284	0.0368667	1.855	0.765625	518.691	1.37655	0.00534249	0.250376	1.62733	2.67994
M046_MAX_iba1-555_rat-W5-r11_contro_TRANCHE3_acq23.czi - C=0-1	3.64711	0.0532168	0.0522148	18.791	0.220627	9.08705	1.86333	1.30498	1.02954	15.4537	0.939224	0.0415	2.475	0.88785	510.332	1.34136	0.00602883	0.166867	1.06052	1.68123
M047_MAX_iba1-555_rat-W5-r11_EL_tranche2_acq11-3	3.4241	0.0687948	0.172109	14.536	0.320932	8.76577	1.69064	1.27301	1.06448	7.37859	0.880648	0.0356556	0.961667	0.618557	385.682	1.36178	0.00586905	0.141223	1.10041	1.37638
M047_MAX_iba1-555_rat-W5-r11_contro_TRANCHE3_acq23.czi - C=0-1	3.62515	0.0545796	0.0622131	18.3219	0.247557	10	1.31959	1.09114	1.09697	15.383	0.938961	0.0427778	2.47	0.784483	518.44	1.40607	0.00630791	0.125874	1.21305	1.40975
M048_MAX_iba1-555_rat-W5-r11_EL_tranche2_acq12-3	3.64071	0.0536104	0.0637314	18.6531	0.25915	10.2479	1.36813	1.11102	1.07922	15.9251	0.940916	0.0351667	2.08333	0.969072	473.126	1.36472	0.00509806	0.198732	1.15072	1.36637
M048_MAX_iba1-555_rat-W5-r11_contro_TRANCHE3_acq24.czi - C=0-2	3.49042	0.0637376	0.0965507	15.6893	0.239331	8.61224	1.64366	1.25288	1.12205	8.89825	0.898972	0.0313444	0.876667	1.11688	379.48	1.34378	0.00455374	0.0776288	1.60935	1.66573
M049_MAX_iba1-555_rat-W5-r11_EL_tranche2_acq12-3	3.45403	0.0664644	0.0540619	15.0456	0.227673	7.26954	1.73141	1.13034	1.01261	15.6039	0.939773	0.0284111	1.15333	0.771084	326.673	1.32036	0.00428906	0.0279672	1.46373	1.56715
M049_MAX_iba1-555_rat-W5-r11_contro_TRANCHE3_acq24.czi - C=0-2	3.65097	0.0529811	0.0492885	18.8747	0.232158	9.58173	1.84636	1.56485	1.05359	15.507	0.93942	0.0394333	2.18333	1.0566	488.355	1.40003	0.00561799	0.0375346	2.0063	2.30851
M050_MAX_iba1-555_rat-W5-r11_EL_tranche2_acq12-3	3.63076	0.0542282	0.0648828	18.4406	0.267284	9.98011	1.58893	1.46892	1.04683	11.6667	0.921053	0.0320889	2.345	1.20779	370.695	1.35074	0.00452422	0.0558242	1.06352	2.5329
M050_MAX_iba1-555_rat-W5-r11_contro_TRANCHE3_acq25.czi - C=0-2	3.52624	0.0611624	0.0518044	16.3499	0.173114	6.65228	1.71447	1.12707	0.977887	11.0294	0.91687	0.0227222	2.17	1.2	363	1.30403	0.00285903	0.0911754	1.49931	1.82833
M051_MAX_iba1-555_rat-W5-r11_EL_tranche2_acq13-1	3.70167	0.0499771	0.0515466	20.0092	0.261047	11.1391	1.41226	1.11659	1.08959	21.375	0.955307	0.0397778	2.35	0.889908	501.018	1.39432	0.0056958	0.0689101	1.26976	1.29238
M051_MAX_iba1-555_rat-W5-r11_contro_TRANCHE3_acq25.czi - C=0-2	3.62816	0.0543907	0.0830821	18.3855	0.252013	9.4375	1.86628	1.57278	1.02252	8.18021	0.89107	0.0288667	1.34	0.752381	441.521	1.33396	0.0041422	0.0392383	1.27461	2.70128
M052_MAX_iba1-555_rat-W5-r11_EL_tranche2_acq14-1	3.71866	0.0490087	0.0387443	20.4045	0.228966	10.461	1.40912	1.08528	1.07142	21.6839	0.955916	0.0390667	3.41	1.125	496.657	1.39726	0.00519517	0.405101	1.36169	1.44885
M052_MAX_iba1-555_rat-W5-r11_contro_TRANCHE3_acq26.czi - C=0-5	3.62922	0.0543246	0.0753478	18.4079	0.23317	9.43627	1.43153	1.22204	1.0616	14.9679	0.937374	0.0386778	1.325	0.71831	565.174	1.3798	0.00571538	0.0338983	1.19677	1.20449
M053_MAX_iba1-555_rat-W5-r11_EL_tranche2_acq14-1	3.70433	0.0498244	0.0517732	20.0705	0.215812	9.75895	1.32092	1.0773	1.04666	19.2638	0.950651	0.0367	2.49667	1	485.74	1.38136	0.00484588	0.0347997	1.00349	1.0113
M053_MAX_iba1-555_rat-W5-r11_contro_TRANCHE3_acq26.czi - C=0-4	3.55789	0.058974	0.102333	16.9566	0.271918	9.22321	1.66347	1.38259	1.0431	10.607	0.913845	0.0295333	0.938333	0.855769	451.301	1.32855	0.00448405	0.0581894	1.48964	1.68902
M054_MAX_iba1-555_rat-W5-r11_EL_tranche2_acq15-1	3.60969	0.0555598	0.130815	17.9986	0.271684	9.70765	1.57784	1.308	1.03477	6.89059	0.873267	0.0344556	1.71167	1.03061	424.366	1.36683	0.00518249	0.109232	1.0084	1.91539
M054_MAX_iba1-555_rat-W5-r11_contro_TRANCHE3_acq26.czi - C=0-3	3.56658	0.0583866	0.0782958	17.1272	0.20541	7.98728	1.5602	1.27404	1.02897	9.48235	0.904602	0.0297	1.76667	0.810811	415.221	1.33162	0.0041812	0.305823	1.76051	1.90396
M055_MAX_iba1-555_rat-W5-r11_EL_tranche2_acq15-2	3.51501	0.0619585	0.067205	16.1398	0.308495	9.15989	1.76959	1.46448	1.0218	16.45	0.942693	0.0387778	2.04333	0.842975	447.962	1.37517	0.00615851	0.136472	2.01687	2.11891
M055_MAX_iba1-555_rat-W5-r11_contro_TRANCHE3_acq26.czi - C=0-2	3.73193	0.048266	0.0573539	20.7185	0.230622	10.1808	1.42308	1.22329	1.02323	13.5292	0.931173	0.0387444	2.94	0.885965	583.963	1.39088	0.00519643	0.0508037	1.64	1.90063
M056_MAX_iba1-555_rat-W5-r11_EL_tranche2_acq16-2	3.50205	0.0628899	0.0955902	15.9008	0.258203	8.61682	1.99439	1.60587	1.06647	8.70968	0.89701	0.0267556	1.33667	0.905405	353.646	1.32747	0.00393972	0.148358	2.22717	2.23658
M056_MAX_iba1-555_rat-W5-r11_contro_TRANCHE3_acq26.czi - C=0-1	3.44471	0.0671815	0.0957808	14.885	0.236453	7.30226	1.33077	1.08147	1.00887	10.2676	0.91125	0.0266667	1.22833	0.974684	366.267	1.30746	0.00376533	0.0612372	1.27117	1.28364
M057_MAX_iba1-555_rat-W5-r11_EL_tranche2_acq16-2	3.47342	0.0649973	0.10525	15.3853	0.206424	6.79737	1.55709	1.19944	0.972425	7.12681	0.876951	0.0249222	1.57167	0.933333	286.732	1.29649	0.00358378	0.264567	1.00046	1.72139
M057_MAX_iba1-555_rat-W5-r11_contro_TRANCHE3_acq27.czi - C=0-2	3.60278	0.0560034	0.0720772	17.8561	0.238173	8.92519	1.9418	1.44281	1.0242	9.72819	0.906788	0.0355222	2.39333	0.762963	612.012	1.38425	0.00527048	0.160153	2.40449	2.60565
M058_MAX_iba1-555_rat-W5-r11_EL_tranche2_acq17-2	3.60037	0.0561591	0.112213	17.8066	0.285268	9.73596	1.73708	1.35732	1.0237	10.7773	0.915091	0.0335	1.28667	0.947368	404.947	1.34938	0.00516292	0.106193	1.28692	1.31404
M058_MAX_iba1-555_rat-W5-r11_contro_TRANCHE3_acq27.czi - C=0-1	3.72715	0.0485323	0.060647	20.6048	0.225867	9.81818	1.6383	1.35296	1.00262	13.575	0.931389	0.0388667	2.065	0.671141	658.755	1.38139	0.00553315	0.119557	1.64946	2.29171
M059_MAX_iba1-555_rat-W5-r11_EL_tranche2_acq17-2	3.44709	0.0669976	0.0488846	14.9259	0.216262	6.80645	1.89826	1.41892	0.980595	14.0658	0.933624	0.0254444	1.64833	1	302.346	1.29969	0.00357758	0.140181	1.06148	2.05489
M059_MAX_iba1-555_rat-W5-r11_contro_TRANCHE3_acq28.czi - C=0-1	3.71593	0.0491633	0.0334175	20.3404	0.191642	8.98491	1.5288	1.15803	1.00904	23.4015	0.959019	0.0371444	1.97833	0.881356	618.361	1.38894	0.00484375	0.197198	1.04666	1.54614
M060_MAX_iba1-555_rat-W5-r11_PL_acq1-1	3.61619	0.0551458	0.0556095	18.1338	0.303184	9.60952	2.02148	1.60462	0.962411	15.2893	0.93861	0.0438	1.91667	0.736434	486.022	1.40443	0.00696196	0.19245	1.0465	3.16274
M060_MAX_iba1-555_rat-W5-r11_contro_TRANCHE3_acq29.czi - C=0-3	3.49195	0.0636251	0.0644505	15.7171	0.255472	8.41503	1.29139	1.02268	1.05928	15.8189	0.940543	0.0237333	0.896667	1	391.622	1.2953	0.00338124	0.21745	1.21417	1.4676
M061_MAX_iba1-555_rat-W5-r11_PL_acq2-2	3.47016	0.0652417	0.0778891	15.3276	0.255752	7.77778	2.06513	1.72575	1.00339	6.77159	0.871326	0.031	1.43	1.05634	312.07	1.35226	0.00485946	0.171437	2.15079	5.65659
M061_MAX_iba1-555_rat-W5-r11_contro_TRANCHE3_acq29.czi - C=0-1	3.60291	0.0559954	0.0776737	17.8586	0.322227	10.5478	1.45521	1.23736	1.04047	16.8889	0.944099	0.0304111	1.89833	0.631206	542.514	1.33758	0.00465994	0.233322	1.56391	1.56391
M062_MAX_iba1-555_rat-W5-r11_PL_acq2-2	3.60954	0.0555693	0.0496133	17.9955	0.291468	10.1439	1.57624	1.18413	1.0441	23.3368	0.95891	0.0521889	3.765	0.546012	576.226	1.45179	0.00804959	0.450439	1.04903	1.32516
M062_MAX_iba1-555_rat-W5-r11_contro_TRANCHE3_acq29.czi - C=0-2	3.68759	0.0507936	0.0556184	19.6875	0.228905	9.75521	1.36778	1.01722	1.03566	16.784	0.94377	0.0320111	1.74667	0.777778	604.459	1.35483	0.00442839	0.124978	1.35374	1.5078
M063_MAX_iba1-555_rat-W5-r11_PL_acq3-3	3.48118	0.0644189	0.120125	15.5234	0.319286	9.36196	1.46688	1.25868	1.06731	9.21927	0.902146	0.0341778	1.18	0.822222	377.865	1.37238	0.00547366	0.114035	1.09194	1.92206
M063_MAX_iba1-555_rat-W5-r11_contro_TRANCHE3_acq30.czi - C=0-3	3.60733	0.0557107	0.0815703	17.9499	0.274363	9.94379	1.52097	1.31401	1.05761	11.5676	0.92043	0.031	1.40667	0.785047	460.96	1.34017	0.00459119	0.197657	1.23975	1.93854
M064_MAX_iba1-555_rat-W5-r11_PL_acq3-3	3.63808	0.0537732	0.0234986	18.5966	0.273932	9.84941	1.87377	1.5806	1.01194	33.1695	0.970734	0.0448	2.73	0.767241	462.881	1.41523	0.00667253	0.10084	1.08961	2.67524
M064_MAX_iba1-555_rat-W5-r11_contro_TRANCHE3_acq30.czi - C=0-2	3.70654	0.0496977	0.0319197	20.1216	0.235822	9.94444	1.85386	1.46468	1.01771	24.4	0.96063	0.0338667	2.72667	0.684615	581.634	1.36458	0.00454323	0.221098	2.20534	2.21057
M065_MAX_iba1-555_rat-W5-r11_PL_acq3-3	3.77147	0.0461181	0.0592293	21.6834	0.338952	13.7083	1.49321	1.26161	1.08589	19.8182	0.951965	0.0458	1.89	0.627551	697.175	1.41604	0.00711188	0.19266	1.90602	1.90648
M065_MAX_iba1-555_rat-W5-r11_contro_TRANCHE3_acq30.czi - C=0-1	3.62485	0.0545986	0.0720405	18.3155	0.230702	9.31733	1.4152	1.24061	1.05913	12.5327	0.926105	0.0321778	2.165	0.693694	474.416	1.35042	0.00449399	0.0831028	1.38726	1.50841
M066_MAX_iba1-555_rat-W5-r11_PL_acq4-1	3.49621	0.0633142	0.0766959	15.7942	0.250324	7.92056	1.74032	1.28714	1.00232	12.2826	0.924714	0.0407333	1.76	0.942857	429.037	1.39227	0.00634848	0.0842152	1.58979	1.93052
M066_MAX_iba1-555_rat-W5-r11_contro_TRANCHE3_acq31.czi - C=0-1	3.76361	0.0465371	0.0468477	21.4882	0.219774	10.8134	1.70152	1.50182	1.07343	13.0279	0.928713	0.0391222	2.91667	1.15596	595.968	1.39647	0.00521729	0.282501	2.71791	2.86454
M067_MAX_iba1-555_rat-W5-r11_PL_acq4-1	3.43796	0.0677053	0.117862	14.7699	0.292245	7.92212	1.66713	1.36953	0.99218	8.14341	0.890632	0.0262111	0.813333	0.833333	308.436	1.29493	0.00430055	0.0651083	1.20137	2.42071
M067_MAX_iba1-555_rat-W5-r11_contro_TRANCHE3_acq32.czi - C=0-3	3.40858	0.0700346	0.0779769	14.2787	0.248461	6.76176	2.44561	1.82497	0.950043	7.94581	0.888216	0.0201778	0.856667	0.861111	335.831	1.2704	0.00294845	0.165931	1.83332	4.32104
M068_MAX_iba1-555_rat-W5-r11_PL_acq4-1	3.40255	0.0705228	0.111175	14.1798	0.310154	7.37006	2.3282	1.48094	0.933279	9.01487	0.900148	0.0299333	1.07667	0.677778	321.521	1.33831	0.00497891	0.155331	1.12528	2.14097
M068_MAX_iba1-555_rat-W5-r11_contro_TRANCHE3_acq32.czi - C=0-3	3.71322	0.0493166	0.0366124	20.2771	0.304742	12.2058	1.86905	1.43425	1.09042	25.4	0.962121	0.0381333	2.245	0.668831	608.941	1.38591	0.00568161	0.204837	1.84246	2.40253
M069_MAX_iba1-555_rat-W5-r11_PL_acq5-1	3.64404	0.0534055	0.0846057	18.7247	0.301073	10.6368	1.74596	1.49708	1.03528	9.25703	0.902506	0.0567556	2.91167	0.786765	519.806	1.44508	0.00938331	0.131999	3.41146	3.41334
M069_MAX_iba1-555_rat-W5-r11_contro_TRANCHE3_acq32.czi - C=0-3	3.63004	0.0542732	0.0792893	18.4253	0.263123	9.98645	1.69333	1.38976	1.05662	9.53974	0.905121	0.0353667	2.18167	0.756757	514.934	1.37006	0.00507105	0.250667	1.91337	2.64823
M070_MAX_iba1-555_rat-W5-r11_PL_acq6-3	3.52415	0.0613096	0.0628652	16.3107	0.27986	9.40483	1.5902	1.35388	1.08995	14.0861	0.933714	0.0409	2.825	0.702899	485.675	1.39294	0.0065726	0.27432	1.34226	2.32669
M070_MAX_iba1-555_rat-W5-r11_contro_TRANCHE3_acq33.czi - C=0-1	3.77453	0.0459559	0.0456705	21.76	0.250165	10.7896	1.7877	1.23855	0.991363	19.3824	0.950938	0.0462	3.23	0.601064	765.706	1.42011	0.00659807	0.1129	1.13596	1.80294
M071_MAX_iba1-555_rat-W5-r11_PL_acq6-3	3.57818	0.0576121	0.0616704	17.3575	0.339946	11.1445	1.39612	1.16773	1.10121	22.5625	0.95756	0.0418889	1.85	0.455128	486.323	1.39065	0.00704022	0.134302	1.22711	1.60091
M071_MAX_iba1-555_rat-W5-r11_contro_TRANCHE3_acq34.czi - C=0-2	3.64757	0.0531889	0.054327	18.8009	0.251793	9.72111	1.71313	1.35995	1.03042	17.3152	0.945401	0.0374444	2.68167	0.626667	561.91	1.37716	0.00567955	0.0544735	1.54862	1.86504
M072_MAX_iba1-555_rat-W5-r11_PL_acq6-3	3.47208	0.0650978	0.0695861	15.3615	0.285065	8.64888	1.88443	1.27435	1.05452	11.9959	0.923053	0.0355222	0.86	0.725275	357.414	1.35891	0.00557521	0.0729211	1.0627	2.10637
M072_MAX_iba1-555_rat-W5-r11_contro_TRANCHE3_acq34.czi - C=0-1	3.82653	0.0432854	0.0225289	23.1025	0.243944	12.0447	1.75001	1.47417	1.05558	31.2893	0.96903	0.0434111	2.98833	0.598958	812.603	1.40849	0.00594399	0.136691	1.28874	2.82646
M073_MAX_iba1-555_rat-W5-r11_PL_acq7-2	3.47916	0.0645692	0.075041	15.4873	0.3082	9.08876	2.00269	1.67955	1.05709	10.9962	0.91664	0.0347889	2.36333	0.841121	414.732	1.37371	0.00557018	0.279732	3.07583	3.14018
M073_MAX_iba1-555_rat-W5-r11_contro_TRANCHE3_acq35.czi - C=0-1	3.22251	0.0867661	0.0720276	11.5252	0.331175	6.76834	2.23901	1.96036	1.02048	8.53886	0.895166	0.0204556	2.165	0.656716	234.005	1.2596	0.00340225	0.601465	6.6011	7.19879
M074_MAX_iba1-555_rat-W5-r11_PL_acq7-2	3.50002	0.0630367	0.0542899	15.8638	0.275075	8.20397	2.04586	1.556	0.986033	15.3704	0.938914	0.0294667	1.89167	0.613208	397.6	1.34011	0.00459375	0.447045	2.40065	2.75023
M074_MAX_iba1-555_rat-W5-r11_contro_TRANCHE3_acq36.czi - C=0-1	3.49687	0.0632661	0.0327058	15.8062	0.237285	7.44709	2.12778	1.92953	0.967214	14.775	0.936609	0.0280444	2.52	0.71134	384.183	1.31695	0.00426711	0.427372	1.03877	6.87788
M075_MAX_iba1-555_rat-W5-r11_PL_acq8-1	3.50024	0.0630208	0.0570232	15.8678	0.200529	6.87229	2.14262	1.48599	0.967158	10.2183	0.91086	0.0354	3.125	0.803738	409.407	1.35447	0.00541335	0.376657	1.41062	2.59548
M075_MAX_iba1-555_rat-W5-r11_contro_TRANCHE3_acq37.czi - C=0-2-1	3.50235	0.062868	0.0608765	15.9063	0.234674	7.77448	1.68428	1.15812	1.00895	14.2042	0.934229	0.0239889	1.32667	0.890411	349.826	1.30883	0.00333394	0.168089	1.59437	1.60825
M076_MAX_iba1-555_rat-W5-r11_PL_acq8-1	3.55563	0.0591274	0.0643915	16.9126	0.220889	7.6347	1.5988	1.0828	0.960492	13.2055	0.929605	0.0345667	1.77333	0.683168	395.885	1.35588	0.00512997	0.15213	1.08955	1.26639
M076_MAX_iba1-555_rat-W5-r11_contro_TRANCHE3_acq37.czi - C=0-2-1	3.49586	0.0633393	0.137656	15.788	0.234424	8.36808	1.65348	1.19694	1.09471	6.86194	0.872805	0.0234111	0.891667	1.25758	315.739	1.28908	0.00340801	0.272972	1.34031	1.5975
M077_MAX_iba1-555_rat-W5-r11_PL_acq9-3	3.50628	0.0625839	0.0504622	15.9785	0.310388	9.3921	1.64218	1.32512	1.05505	22.25	0.956989	0.0330667	1.49	0.508333	401.25	1.34578	0.00519234	0.172933	1.37507	1.47306
M077_MAX_iba1-555_rat-W5-r11_contro_TRANCHE3_acq38.czi - C=0-4	3.31399	0.0780922	0.17872	12.8054	0.285823	6.51964	1.7646	1.39145	0.95232	5.56977	0.847788	0.0251111	0.941667	0.712329	257.205	1.28206	0.00414681	0.134691	1.43742	1.70813
M078_MAX_iba1-555_rat-W5-r11_PL_acq9-3	3.29246	0.0800525	0.0771275	12.4918	0.260157	6.88822	1.49389	1.15057	1.0811	11.2166	0.918144	0.0294556	1.15333	0.670588	324.7	1.32504	0.00453608	0.272602	1.23394	1.83171
M079_MAX_iba1-555_rat-W5-r11_PL_acq10	3.61509	0.0552154	0.0345319	18.1109	0.215805	8.8747	1.38769	1.23516	1.05483	22.5793	0.95759	0.0379889	2.38667	0.704918	462.847	1.37552	0.00551934	0.0342043	2.0924	2.09488
M080_MAX_iba1-555_rat-W5-r11_PL_acq10	3.20672	0.0883576	0.155174	11.3176	0.315603	6.08904	2.69114	1.92143	0.957683	4.3515	0.813136	0.0218222	0.66	0.769231	188.729	1.27492	0.00372572	0.176236	3.11512	4.1777
M080_MAX_iba1-555_rat-W5-r11_TRANCHE3_ipsi_acq39.czi - C=0-2-2	3.33428	0.0762895	0.150474	13.108	0.268477	7.24199	1.55045	1.36797	1.06628	5.97455	0.856621	0.0213111	0.751667	0.935484	281.436	1.27079	0.00347943	0.366052	1.08149	2.56718
M081_MAX_iba1-555_rat-W5-r11_L_acq1-3	3.44725	0.0669854	0.132062	14.9286	0.301452	8.41463	1.76193	1.31977	1.02661	7.58044	0.883456	0.0302222	0.933333	0.882353	322.264	1.33639	0.00490424	0.214373	1.71005	2.03821
M081_MAX_iba1-555_rat-W5-r11_TRANCHE3_ipsi_acq39.czi - C=0-2-2	3.66772	0.0519693	0.0542464	19.2421	0.254333	9.62016	1.91163	1.44991	0.991352	14.5156	0.935549	0.0331	2.06333	0.896907	477.831	1.3593	0.00486207	0.286779	1.09148	2.43723
M082_MAX_iba1-555_rat-W5-r11_L_acq1-3	3.36866	0.0733286	0.0669109	13.6372	0.33693	7.77151	2.40484	1.88178	0.981768	13.7487	0.932198	0.0326111	1.47167	0.829787	284.329	1.33489	0.00576202	0.147668	2.82715	3.5381
M082_MAX_iba1-555_rat-W5-r11_TRANCHE3_ipsi_acq39.czi - C=0-2-2	3.44523	0.0671414	0.0559458	14.8939	0.256611	7.74468	1.69701	1.39238	1.02649	15.2867	0.9386	0.0258778	1.05333	0.666667	359.102	1.30552	0.00383047	0.207212	2.10691	2.17465
M083_MAX_iba1-555_rat-W5-r11_L_acq1-3	3.38788	0.0717244	0.0681418	13.9423	0.289293	7.67898	1.48633	1.39126	1.024	11.3086	0.918756	0.0332333	2.94333	0.976744	279.249	1.34229	0.00543539	0.621685	1.02224	2.63931
M083_MAX_iba1-555_rat-W5-r11_TRANCHE3_ipsi_acq40.czi - C=0-2	3.67929	0.0512814	0.0510563	19.5002	0.233041	8.98104	1.95243	1.44763	0.954049	13.5217	0.931138	0.0334	2.16333	0.796748	489.068	1.3701	0.00465348	0.253387	1.61806	2.4757
M084_MAX_iba1-555_rat-W5-r11_L_acq2-4	3.35307	0.0746571	0.07496	13.3946	0.265692	6.95556	1.757	1.39915	1.00743	11.875	0.92233	0.0309	1.49333	0.587156	335.021	1.32968	0.0052286	0.264119	1.6361	1.92901
M084_MAX_iba1-555_rat-W5-r11_TRANCHE3_ipsi_acq40.czi - C=0-2	3.50522	0.0626608	0.0582844	15.9589	0.282749	7.7581	2.67169	2.36298	0.91422	9.42759	0.904101	0.0336	1.965	0.844037	419.547	1.31218	0.00545005	0.0979283	1.17626	7.74138
M085_MAX_iba1-555_rat-W5-r11_L_acq2-4	3.61003	0.0555377	0.0471785	18.0058	0.242833	9.47285	1.87408	1.52747	1.06761	16.0754	0.941436	0.0478111	2.72667	0.984496	470.788	1.42396	0.00751956	0.0681757	2.34453	2.41417
M085_MAX_iba1-555_rat-W5-r11_TRANCHE3_ipsi_acq41.czi - C=0-2	3.76466	0.0464807	0.0372167	21.5143	0.249304	11.3653	2.02375	1.51885	1.058	18.4652	0.948626	0.0497444	3.53167	0.629108	773.951	1.4262	0.00780869	0.26101	1.64568	4.45849
M086_MAX_iba1-555_rat-W5-r11_L_acq2-4	3.35392	0.0745838	0.19118	13.4077	0.279502	6.84551	1.49831	1.11883	0.965734	6.70968	0.870293	0.0292111	0.588333	0.870968	211.72	1.31012	0.0050676	0.0703196	1.18746	1.20931
M086_MAX_iba1-555_rat-W5-r11_TRANCHE3_ipsi_acq41.czi - C=0-2	3.60955	0.0555686	0.0659931	17.9958	0.276423	10.388	1.41778	1.17581	1.09793	14.0965	0.93376	0.0434444	2.29333	0.713415	596.707	1.40212	0.00675756	0.113083	1.24203	2.09367
M087_MAX_iba1-555_rat-W5-r11_L_acq2-4	3.54946	0.0595492	0.0743117	16.7928	0.238825	8.32282	1.58204	1.21616	1.01416	13.2403	0.929777	0.0368667	2.60833	0.781513	400.104	1.37068	0.00586908	0.428772	1.31467	1.56771
M087_MAX_iba1-555_rat-W5-r11_TRANCHE3_ipsi_acq42.czi - C=0-2	3.39452	0.0711775	0.12799	14.0494	0.263817	7.68562	1.70095	1.3812	1.06505	6.47018	0.866134	0.0236556	1.44167	0.655556	321.529	1.29811	0.00385732	0.281745	1.9741	2.01624
M088_MAX_iba1-555_rat-W5-r11_L_acq3-3	3.15524	0.0937527	0.113977	10.6664	0.316111	6.21895	1.75443	1.50199	1.03701	8.38148	0.893407	0.0281444	1.05833	1.02	168.223	1.30283	0.00497386	0	2.60731	2.6098
M088_MAX_iba1-555_rat-W5-r11_TRANCHE3_ipsi_acq42.czi - C=0-2	3.54176	0.060079	0.0928519	16.6448	0.284398	9.18654	1.87806	1.28149	1.03493	10.8899	0.915895	0.0288	1.22	0.70339	417.867	1.31704	0.00455864	0.33564	1.63608	1.65045
M089_MAX_iba1-555_rat-W5-r11_L_acq3-3	3.24554	0.084496	0.178158	11.8349	0.347503	7.74839	1.57919	1.27542	1.11063	6.69484	0.870043	0.0364222	0.885	0.75	290.996	1.35229	0.00696429	0.117166	2.02224	2.16996
M089_MAX_iba1-555_rat-W5-r11_TRANCHE3_ipsi_acq43.czi - C=0-5	3.38088	0.0723041	0.136287	13.8305	0.297246	7.39889	1.68938	1.19201	0.981232	8.42222	0.893868	0.0329778	1.05833	0.95098	390.623	1.34155	0.00541905	0.0550667	1.12804	1.35088
M090_MAX_iba1-555_rat-W5-r11_L_acq3-3	3.46225	0.0658388	0.11608	15.1886	0.270758	8.08649	1.85764	1.39731	1.02318	8.65	0.896373	0.0343111	2.29	0.735849	357.668	1.36285	0.00574981	0.324417	1.01047	1.74541
M090_MAX_iba1-555_rat-W5-r11_TRANCHE3_ipsi_acq43.czi - C=0-5	2.99521	0.11272	0.269252	8.87154	0.363708	5.37788	2.00858	1.50406	1.00516	3.42765	0.774147	0.0153	0.36	0.630435	144.886	1.21101	0.00267003	0.378239	1.06853	2.64395
M091_MAX_iba1-555_rat-W5-r11_L_acq4-5	3.35892	0.0741562	0.130593	13.4851	0.307826	8.29966	1.71984	1.39764	1.10932	7.33542	0.88003	0.0295444	0.773333	0.659091	302.976	1.32215	0.0050101	0.202467	1.66771	2.59854
M091_MAX_iba1-555_rat-W5-r11_TRANCHE3_ipsi_acq43.czi - C=0-5	3.19057	0.0900163	0.0626004	11.1091	0.353659	6.348	2.59997	2.23687	0.960873	9.34395	0.903325	0.0180444	1.44333	0.617647	224.592	1.2386	0.00303313	0.588268	8.79569	8.95964
M092_MAX_iba1-555_rat-W5-r11_L_acq4-5	3.24679	0.0843741	0.166754	11.852	0.28143	6.78277	2.02769	1.41792	1.07878	5.27703	0.840689	0.0206444	0.523333	1.29545	168.482	1.25095	0.00336497	0.228488	1.30726	1.98526
M092_MAX_iba1-555_rat-W5-r11_TRANCHE3_ipsi_acq43.czi - C=0-5	3.53143	0.0607979	0.197182	16.4479	0.262111	8.50284	1.67336	1.45864	1.00974	4.96154	0.832258	0.0292778	0.86	0.979381	400.351	1.32523	0.00471065	0.0702395	1.74868	1.84713
M093_MAX_iba1-555_rat-W5-r11_L_acq4-5	3.24453	0.0845939	0.168053	11.8212	0.326575	6.63082	1.60787	1.14556	0.981556	7.32906	0.879938	0.0216556	0.561667	0.637931	205.043	1.26741	0.00357557	0.413348	1.02622	1.37966
M094_MAX_iba1-555_rat-W5-r11_L_acq4-5	3.26651	0.0824806	0.144008	12.1241	0.375487	8.00352	1.69333	1.46293	1.0773	7.85127	0.887022	0.0310778	1.84	0.480769	289.161	1.31372	0.00590503	0.374366	2.82599	2.84159
M094_MAX_iba1-555_rat-W5-r11_TRANCHE3_ipsi_acq44.czi - C=0-2	3.47296	0.0650314	0.0997686	15.3772	0.285957	8.11963	1.91659	1.63841	0.987436	8.58537	0.895674	0.0262	1.43333	0.942857	365.002	1.30863	0.00415477	0.156835	1.34862	2.80751
M095_MAX_iba1-555_rat-W5-r11_L_acq4-5	3.50518	0.0626634	0.0683358	15.9583	0.310795	8.68159	1.80514	1.36077	0.975834	15.0591	0.93773	0.0422889	2.59333	0.545455	381.588	1.38751	0.0072002	0.311371	2.03392	2.04745
M095_MAX_iba1-555_rat-W5-r11_TRANCHE3_ipsi_acq44.czi - C=0-2	3.53985	0.0602118	0.101681	16.608	0.208864	8.44969	1.39436	1.12183	1.11324	8.68837	0.896783	0.0231444	1.03667	1.0241	361.715	1.31187	0.00302915	0.079	1.05788	1.21844
M096_MAX_iba1-555_rat-W5-r11_L_acq5-2	3.53002	0.060897	0.04518	16.4212	0.288166	9.07179	1.83652	1.67617	1.02912	21.3879	0.955333	0.0410444	2.82	0.746377	430.1	1.38497	0.00686412	0.347082	1.46996	2.47156
M096_MAX_iba1-555_rat-W5-r11_TRANCHE3_ipsi_acq45.czi - C=0-2	3.41174	0.0697805	0.0788658	14.3306	0.234724	6.89859	1.78807	1.50068	0.99361	6.9589	0.874355	0.0258222	2.14333	0.807692	271.678	1.29569	0.00402294	0.563521	1.56583	3.64979
M097_MAX_iba1-555_rat-W5-r11_L_acq5-2	3.16938	0.0922395	0.125553	10.8413	0.309546	6.09894	1.91039	1.60756	1.01113	7.7316	0.885473	0.0224111	0.838333	0.916667	168.143	1.27408	0.00387065	0.488337	1.71047	2.44386
M097_MAX_iba1-555_rat-W5-r11_TRANCHE3_ipsi_acq45.czi - C=0-2	3.44561	0.0671121	0.166745	14.9005	0.315502	8.55692	1.58479	1.20755	1.02239	7.05814	0.875902	0.0308	1.38	0.785047	376.415	1.34482	0.00524191	0.0805823	1.53906	1.72232
M098_MAX_iba1-555_rat-W5-r11_L_acq6-4	3.3205	0.0775093	0.0703702	12.9017	0.28303	7.1478	1.5541	1.29193	1.04138	12.2086	0.924291	0.0274444	1.97667	0.5375	263.086	1.30112	0.00449287	0.66643	1.29241	1.92765
M098_MAX_iba1-555_rat-W5-r11_TRANCHE3_ipsi_acq46.czi - C=0-2	3.19777	0.0892731	0.252002	11.2016	0.377332	7.48035	1.85492	1.52313	1.08713	4.45748	0.816765	0.0206778	0.358333	0.69697	219.792	1.25765	0.00376414	0.0518337	2.35463	2.60998
M099_MAX_iba1-555_rat-W5-r11_L_acq6-4	3.31229	0.078246	0.115934	12.7802	0.256467	6.64903	1.62506	1.26414	1.02732	5.64115	0.849424	0.0308444	2.305	0.702703	252.095	1.31875	0.00518877	0.604081	1.65884	2.08785
M099_MAX_iba1-555_rat-W5-r11_TRANCHE3_ipsi_acq46.czi - C=0-2	3.33752	0.0760056	0.131816	13.1569	0.237253	6.96933	1.57355	1.2958	1.0875	8.53012	0.89507	0.0263667	1.18333	0.792683	276.972	1.29519	0.00436898	0.18361	1.0188	1.175
M100_MAX_iba1-555_rat-W5-r11_L_acq6-4	3.36313	0.073797	0.0934755	13.5507	0.277575	7.16919	1.72626	1.24947	1.0042	10.6823	0.9144	0.0388111	2.27	0.528846	364.509	1.37296	0.00661016	0.455271	2.10106	2.10515
M100_MAX_iba1-555_rat-W5-r11_TRANCHE3_ipsi_acq47.czi - C=0-1	3.67817	0.0513476	0.090384	19.4751	0.256319	10.4239	1.22826	1.03256	1.0572	13.5638	0.931337	0.0393222	1.51833	0.886667	580.306	1.39027	0.00595004	0.181825	1.02104	1.03102
M101_MAX_iba1-555_rat-W5-r11_L_acq6-4	3.43008	0.0683227	0.0977281	14.6364	0.277389	8.26124	1.54199	1.19947	1.07168	10.1176	0.910053	0.0357	1.895	0.666667	321.785	1.35132	0.00621608	0.308102	1.57705	1.83247
M101_MAX_iba1-555_rat-W5-r11_TRANCHE3_ipsi_acq48.czi - C=0-2	3.45364	0.0664944	0.0964392	15.0389	0.259941	7.48024	1.84959	1.51928	0.97558	7.35686	0.880338	0.0236778	0.76	0.755556	325.972	1.28048	0.00369446	0.0893167	1.07084	3.53239
M102_MAX_iba1-555_rat-W5-r11_L_acq7-4	3.30346	0.0790454	0.245169	12.651	0.384423	8.54362	1.34912	1.18584	1.08922	6.80387	0.871859	0.0358111	0.613333	0.613861	288.897	1.34721	0.00675411	0.0948569	1.11902	1.23624
M102_MAX_iba1-555_rat-W5-r11_TRANCHE3_ipsi_acq48.czi - C=0-1	3.60458	0.0558875	0.0635383	17.8931	0.23926	9.06733	2.0887	1.48038	1.036	13.287	0.930006	0.0365111	2.30333	0.811475	482.263	1.37027	0.00537562	0.297074	1.01241	1.55807
M103_MAX_iba1-555_rat-W5-r11_L_acq7-4	3.25461	0.0836182	0.0860759	11.9591	0.279155	6.27124	1.66716	1.06998	0.992502	11.6481	0.920937	0.0227667	1.75333	0.535211	224.59	1.26312	0.0037881	0.64332	1.13594	1.43109
M103_MAX_iba1-555_rat-W5-r11_TRANCHE3_ipsi_acq49.czi - C=0-1	3.55459	0.0591981	0.0607785	16.8924	0.200434	7.90566	1.78451	1.40119	1.04535	10.1581	0.910379	0.0266556	2.55667	1.27381	380	1.32285	0.0035047	0.434064	1.46566	2.03144
M104_MAX_iba1-555_rat-W5-r11_L_acq7-4	3.21669	0.0873499	0.163823	11.4482	0.329789	6.31646	2.01436	1.59385	0.960767	4.58661	0.821	0.0268778	0.88	0.646154	231.462	1.2851	0.0049136	0.115016	1.36166	4.39954
M104_MAX_iba1-555_rat-W5-r11_TRANCHE3_ipsi_acq49.czi - C=0-1	3.48313	0.0642747	0.141239	15.5582	0.2734	8.7329	1.64122	1.40263	1.07349	6.72222	0.870504	0.0262556	1.11	1.1039	362.066	1.30561	0.004111	0.206742	1.0695	1.85265
M105_MAX_iba1-555_rat-W5-r11_L_acq7-4	3.39406	0.0712156	0.0491929	14.0419	0.311551	8.51374	1.96158	1.81829	1.08625	16.0749	0.941434	0.0430667	3.62333	0.583893	446.198	1.38369	0.00784061	0.703999	4.54164	5.07302
M105_MAX_iba1-555_rat-W5-r11_TRANCHE3_ipsi_acq49.czi - C=0-1	3.47927	0.0645612	0.086432	15.4892	0.272445	8.53939	1.31391	1.13529	1.05623	11.1944	0.917995	0.0292667	1.78167	0.720721	410.263	1.32411	0.00462276	0.174276	1.33382	1.99087
M106_MAX_iba1-555_rat-W5-r11_L_acq8	2.98295	0.114322	0.179919	8.74725	0.410334	5.61111	1.99096	1.40362	1.0014	5.72277	0.851252	0.0301778	0.661667	0.666667	162	1.29956	0.00596348	0.192839	1.93769	2.97794
M106_MAX_iba1-555_rat-W5-r11_TRANCHE3_ipsi_acq50.czi - C=0-3	3.166	0.0925992	0.17143	10.7992	0.208438	5.23642	1.56012	1.29879	1.06207	4.12011	0.804692	0.0203667	0.831667	0.886364	167.464	1.243	0.00340799	0.140143	1.63764	2.0174
M107_MAX_iba1-555_rat-W5-r11_L_acq9-3	2.92582	0.122094	0.319572	8.19038	0.394071	5.26457	1.93751	1.38935	1.02393	3.24675	0.764526	0.0181667	0.345	0.846154	89.78	1.21297	0.00347467	0.0782062	2.11217	2.13139
M107_MAX_iba1-555_rat-W5-r11_TRANCHE3_ipsi_acq50.czi - C=0-3	3.33959	0.0758246	0.121131	13.1883	0.206779	6.36533	1.62948	1.23373	1.0614	5.38284	0.84333	0.0214889	1.25167	0.947368	231.898	1.26303	0.00330703	0.214519	1.18216	1.94608
M108_MAX_iba1-555_rat-W5-r11_L_acq9-3	2.4057	0.222206	0.329987	4.50033	0.443233	3.01899	1.60897	1.29107	1.00763	2.78814	0.736018	0.00993333	0.176667	0.4	39.3936	1.12052	0.00191381	0.211525	1.35215	2.47168
M108_MAX_iba1-555_rat-W5-r11_TRANCHE3_ipsi_acq51.czi - C=0-1	3.55804	0.0589639	0.068515	16.9595	0.258515	8.47753	2.07806	1.41622	0.983134	10.1504	0.910317	0.028	2.49	0.988764	374.599	1.35357	0.00419028	0.785786	1.13279	2.43414
M109_MAX_iba1-555_rat-W5-r11_L_acq9-3	2.49935	0.199495	0.564373	5.01266	0.495588	3.64516	1.81202	1.41852	1.03297	1.5402	0.60633	0.0112333	0.258333	1.18182	32.894	1.15091	0.00223411	0.351625	2.88313	3.39667
M109_MAX_iba1-555_rat-W5-r11_TRANCHE3_ipsi_acq51.czi - C=0-1	3.60167	0.0560751	0.0917203	17.8332	0.278416	10.2848	1.38799	1.15858	1.093	13.6022	0.931517	0.0293667	0.86	0.696	481.69	1.33343	0.00447054	0.246043	1.25973	1.47705
M110_MAX_iba1-555_rat-W5-r11_L_acq9-3	3.09162	0.100877	0.172625	9.91301	0.366984	6.27341	1.74277	1.35348	1.04466	6.75427	0.871039	0.0252444	0.615	0.928571	183.125	1.28961	0.00477003	0.265372	1.12477	2.52569
M110_MAX_iba1-555_rat-W5-r11_TRANCHE3_ipsi_acq52.czi - C=0-2-1	3.02202	0.109294	0.303398	9.14962	0.280149	5.12683	1.45015	1.16347	1.05865	3.33884	0.769524	0.0116667	0.223333	0.964286	116.645	1.21123	0.00185384	0.16619	1.02074	1.25452
M111_MAX_iba1-555_rat-W5-r11_L_acq10-7	2.56661	0.18463	0.113491	5.41624	0.414877	3.18636	3.63061	2.76978	0.913351	3.41391	0.773443	0.0148111	0.48	0.588235	43.1823	1.17061	0.00274407	0.273896	8.8277	10.9972
M111_MAX_iba1-555_rat-W5-r11_TRANCHE3_ipsi_acq52.czi - C=0-2-1	3.29523	0.0797975	0.12274	12.5317	0.235196	5.93811	1.67025	1.26171	0.977064	7.72539	0.885392	0.0187111	0.71	0.72549	197.753	1.24945	0.00299771	0.048737	1.18498	1.60809
M112_MAX_iba1-555_rat-W5-r11_L_acq10-7	2.53138	0.192272	0.357782	5.20096	0.40709	3.07216	2.93408	1.70386	0.925798	1.96034	0.662201	0.0116111	0.145	0.818182	39.3425	1.13124	0.00224442	0.154672	1.6723	3.0883
M112_MAX_iba1-555_rat-W5-r11_TRANCHE3_ipsi_acq53.czi - C=0-3	3.63686	0.0538487	0.102856	18.5705	0.313244	11.1488	2.036	1.48219	1.07266	9.21451	0.9021	0.0359778	1.95	0.577922	569.702	1.36547	0.00592541	0.211615	1.14601	2.34255
M113_MAX_iba1-555_rat-W5-r11_L_acq10-7	2.77202	0.145746	0.208881	6.86127	0.367287	3.96133	2.73707	1.62613	0.952651	4.23494	0.808976	0.00965556	0.106667	0.666667	62.7312	1.10264	0.00166134	0.182679	2.31562	2.74772
M113_MAX_iba1-555_rat-W5-r11_TRANCHE3_ipsi_acq53.czi - C=0-3	3.43983	0.0675602	0.152039	14.8016	0.248735	7.86728	1.53783	1.24445	1.06573	6.63754	0.869068	0.0262222	1.30333	0.9875	327.84	1.30095	0.00420451	0.321543	1.23196	1.61447
M114_MAX_iba1-555_rat-W5-r11_L_acq10-7	2.29509	0.252382	0.704252	3.96224	0.612263	3.02479	2.40827	2.01893	0.97563	0.979592	0.494845	0.00754444	0.05	0.833333	20.503	1.06804	0.00148485	0.15823	1.69991	5.09224
M114_MAX_iba1-555_rat-W5-r11_TRANCHE3_ipsi_acq53.czi - C=0-3	3.31833	0.0777033	0.0706888	12.8695	0.187321	5.41316	1.89829	1.38997	0.971843	7.72532	0.885391	0.0225889	1.22333	0.87931	211.494	1.26378	0.0034844	0.19837	1.57525	2.1341
M115_MAX_iba1-555_rat-W5-r11_L_acq10-7	2.28304	0.255908	0.414901	3.90766	0.529648	2.6281	2.97967	2.13627	0.924126	1.2618	0.557875	0.00585556	0.158333	1	13.932	1.01394	0.00106209	0.394459	2.63268	6.10001
M115_MAX_iba1-555_rat-W5-r11_TRANCHE3_ipsi_acq54.czi - C=0-1-3	3.4654	0.0656002	0.222325	15.2439	0.330288	9.74205	1.54664	1.32695	1.11201	5.12471	0.836727	0.0289222	0.89	0.713043	409.153	1.33482	0.00494461	0.285385	1.63425	1.70279
M116_MAX_iba1-555_rat-W5-r11_L_acq10-7	2.07451	0.325351	0.527825	3.07361	0.527415	2.14706	2.81448	1.77828	0.961876	0.942308	0.485149	0.00448889	0.0166667	0	6.25	1.00831	0.000790418	0.205132	4.35084	4.41352
M116_MAX_iba1-555_rat-W5-r11_TRANCHE3_ipsi_acq54.czi - C=0-1-3	3.17121	0.0920447	0.16565	10.8643	0.299254	5.82014	2.27192	1.62062	0.979293	6.08835	0.858924	0.0196111	0.578333	0.847458	227.288	1.23687	0.00331127	0.191904	1.01172	1.90725
M117_MAX_iba1-555_rat-W5-r11_L_acq10-1	2.29941	0.251132	0.390819	3.98197	0.516556	2.85496	2.29503	1.79679	0.99757	2.03896	0.67094	0.0078	0.045	0.625	23.4076	1.08171	0.00148237	0.0533761	5.26889	5.29384
M117_MAX_iba1-555_rat-W5-r11_TRANCHE3_ipsi_acq54.czi - C=0-1-3	3.32715	0.076918	0.162126	13.0009	0.285635	7.10606	1.74415	1.31699	1.02271	7.11599	0.876786	0.0287667	1.22833	0.662921	299.835	1.32365	0.00495285	0.400849	1.08531	1.17213
M118_MAX_iba1-555_rat-W5-r11_L_acq10-7	2.52987	0.192606	0.118047	5.19194	0.428751	3.27211	2.85906	2.05804	0.962488	4.88793	0.830161	0.00758889	0.17	1.07692	39.1552	1.06715	0.00128646	0.223115	1.95993	7.3952
M118_MAX_iba1-555_rat-W5-r11_TRANCHE3_ipsi_acq55.czi - C=0-1-1	3.05951	0.104676	0.283097	9.55328	0.35193	5.9486	1.50728	1.0942	1.04962	4.23333	0.808917	0.0157	0.27	0.64	150.678	1.19414	0.00280771	0.219373	1.2614	1.49712
M119_MAX_iba1-555_rat-W5-r11_L_acq11	1.85559	0.418609	1.13015	2.38886	0.76616	2.04819	2.70362	1.966	0.979534	0.562016	0.359801	0.00447778	0	1	4.66207	0.990987	0.000861557	0.070447	2.00638	4.08119
M119_MAX_iba1-555_rat-W5-r11_TRANCHE3_ipsi_acq55.czi - C=0-1-1	2.85265	0.132825	0.219802	7.52872	0.374626	4.36123	2.09048	1.53302	0.946432	3.96751	0.798692	0.0152889	0.443333	0.575	109.562	1.22123	0.00285954	0.196259	2.06052	3.10861
M120_MAX_iba1-555_rat-W5-r11_L_acq11	2.05789	0.331634	1.39123	3.01538	0.645809	2.65957	1.53648	1.2368	1.09754	0.632836	0.387569	0.00607778	0.00333333	1	12.7547	1.02211	0.0012173	0.0855138	1.87986	2.12463
M120_MAX_iba1-555_rat-W5-r11_TRANCHE3_ipsi_acq55.czi - C=0-1-1	2.6848	0.161141	0.526739	6.20574	0.3851	4.19718	1.80499	1.25171	1.08988	2.24779	0.692098	0.00815556	0.06	0.769231	60.2854	1.07434	0.0014306	0.0825348	1.20264	1.60573
M121_MAX_iba1-555_rat-W5-r11_L_acq11	2.2483	0.266351	0.590171	3.75445	0.649111	3.03704	2.26991	1.86548	1.00403	1.68079	0.626976	0.0105444	0.0566667	0.444444	23.0067	1.12381	0.00219427	0.0725858	1.14976	3.94945
M121_MAX_iba1-555_rat-W5-r11_TRANCHE3_ipsi_acq55.czi - C=0-3	2.94318	0.119678	0.211991	8.35574	0.403323	5.7619	1.65616	1.24361	1.08581	7.40945	0.881086	0.0118667	0.29	0.651163	132.422	1.15903	0.0019994	0.164783	1.04517	1.27469
M122	2.52942	0.192705	0.146974	5.18927	0.435926	2.94886	2.97354	2.22835	0.860682	2.68519	0.728643	0.00884444	0.641667	1.42857	29.1379	1.11561	0.00156592	0.868922	2.41605	11.2706
M122_MAX_iba1-555_rat-W5-r11_TRANCHE3_ipsi_acq56.czi - C=0-1	2.39658	0.22455	0.399568	4.45336	0.473801	3.14961	1.95901	1.69367	1.02747	1.76724	0.638629	0.00713333	0.0416667	0.777778	26.8902	1.05935	0.00131329	0.167444	1.8326	5.24019
M123_MAX_iba1-555_rat-W5-r11_L_acq12-4	2.70655	0.157155	0.23618	6.36313	0.352538	3.6044	2.17806	1.50309	0.954023	2.89959	0.743563	0.0211444	0.678333	0.407407	67.4777	1.24106	0.00413088	0.276035	1.85365	2.473
M123_MAX_iba1-555_rat-W5-r11_TRANCHE3_ipsi_acq56.czi - C=0-1	3.27839	0.0813603	0.126686	12.291	0.241849	5.40406	3.10717	2.36344	0.894048	3.4528	0.775422	0.0335444	1.68333	0.75	297.832	1.33642	0.00613003	0.051477	2.24181	6.95459
M124_MAX_iba1-555_rat-W5-r11_L_acq12-4	2.77833	0.14469	0.163707	6.91132	0.364915	3.97297	2.76763	2.0364	0.951609	3.87293	0.794785	0.0196	0.415	0.466667	85.3894	1.23221	0.00373681	0.047619	2.91521	5.1522
M124_MAX_iba1-555_rat-W5-r11_TRANCHE3_ipsi_acq57.czi - C=0-4	2.83545	0.135481	0.216011	7.38111	0.357328	4.22609	2.44221	2.15431	0.957819	3.09496	0.755797	0.0153333	0.498333	0.575758	103.779	1.19477	0.00286877	0.0269191	3.77081	5.64942
M125_MAX_iba1-555_rat-W5-r11_L_acq12-4	2.15095	0.29794	0.68342	3.35638	0.551724	2.44715	2.1952	1.63883	0.981587	1.51969	0.603125	0.00711111	0.0333333	0.6	9.01813	1.10307	0.0013976	0.0559017	1.3432	2.70234
M125_MAX_iba1-555_rat-W5-r11_TRANCHE3_ipsi_acq57.czi - C=0-4	2.78425	0.143708	0.559218	6.95854	0.390029	4.34545	1.89996	1.52329	0.999929	2.16878	0.684421	0.0166889	0.208333	0.545455	121.903	1.20841	0.00334565	0.138952	1.67092	2.13238
M126_MAX_iba1-555_rat-W5-r11_L_acq13-2	2.82218	0.137568	0.529671	7.26913	0.472878	5.24868	1.54165	1.20145	1.05001	2.66832	0.727395	0.0164667	0.108333	0.787879	75.3479	1.18968	0.00320902	0.0519524	1.03665	1.47111
M126_MAX_iba1-555_rat-W5-r11_TRANCHE3_ipsi_acq57.czi - C=0-4	2.95877	0.117549	0.148336	8.50706	0.341372	4.34875	3.35302	2.06484	0.874926	4.24601	0.809379	0.0182444	0.55	0.609756	133.364	1.20753	0.00335274	0.27258	1.81885	3.91038
M127_MAX_iba1-555_rat-W5-r11_L_acq13-2	3.34763	0.075126	0.0286623	13.311	0.179526	5.57245	1.91856	1.44189	0.988036	13.5267	0.931161	0.0484222	6.115	0.871795	240.061	1.3441	0.00828589	1.0324	1.10221	3.54178
M127_MAX_iba1-555_rat-W5-r11_TRANCHE3_ipsi_acq57.czi - C=0-4	3.22712	0.0863067	0.0807458	11.5866	0.243698	5.49357	1.79037	1.33718	0.960447	9.828	0.907647	0.0300778	1.505	0.6625	253.366	1.31037	0.00546036	0.394364	2.56439	2.70322
M128_MAX_iba1-555_rat-W5-r11_L_acq14-3	2.24257	0.268115	0.449652	3.72975	0.683612	3.06164	2.62013	2.05447	0.992819	1.94588	0.660542	0.0127	0.0816667	0.666667	20.0384	1.13435	0.00272235	0.215335	2.85009	5.95365
M128_MAX_iba1-555_rat-W5-r11_TRANCHE3_ipsi_acq58.czi - C=0-1-1	2.411	0.220853	0.757695	4.52789	0.472924	2.98013	1.72497	1.06755	0.95707	1.32544	0.569975	0.00873333	0.0966667	1	33.2232	1.09674	0.00171639	0.0356688	1.92109	2.20797
M129_MAX_iba1-555_rat-W5-r11_L_acq14-3	2.27821	0.257336	0.170096	3.88598	0.500923	2.46923	3.24589	2.60257	0.897793	2.23214	0.690608	0.00603333	0.101667	1.5	9.6	1.02168	0.00106472	0.530818	3.18809	12.0513
M129_MAX_iba1-555_rat-W5-r11_TRANCHE3_ipsi_acq61-3	2.31176	0.247584	0.926152	4.03903	0.542056	2.95652	1.53712	1.02387	0.994218	1.62783	0.619458	0.00902222	0.07	0.7	23.1889	1.09465	0.00180702	0.210559	1.06992	1.26534
M130_MAX_iba1-555_rat-W5-r11_L_acq14-3	1.89546	0.39983	0.278411	2.50106	0.677355	1.61386	4.96164	3.60789	0.784032	1.46715	0.594675	0.00375556	0.0183333	0	4.78109	0.920338	0.000645609	0.384615	4.77839	18.4057
M130_MAX_iba1-555_rat-W5-r11_TRANCHE3_ipsi_acq61-3	2.43842	0.21399	0.372882	4.67311	0.521972	3.13333	3.52363	2.28164	0.928062	1.2757	0.560575	0.0108222	0.148333	0.8	26.3736	1.11016	0.00209951	0.214945	8.49114	8.5221
M131_MAX_iba1-555_rat-W5-r11_L_acq15-6	2.64822	0.168073	0.279922	5.94981	0.392837	3.52564	2.95821	1.88112	0.945429	1.64591	0.622059	0.00755556	0.175	1	26.0638	1.08171	0.00126745	0.306786	3.93947	4.31231
M131_MAX_iba1-555_rat-W5-r11_TRANCHE3_ipsi_acq61-3	2.28313	0.255881	0.828648	3.90806	0.618893	3.11679	2.17	1.27347	1.01377	1.78592	0.641053	0.0105556	0.05	0.263158	33.11	1.12839	0.00219953	0.0648886	1.18586	1.41533
M132_MAX_iba1-555_rat-W5-r11_L_acq15-6	2.2272	0.272902	0.101662	3.66432	0.406629	2.04975	4.40037	3.44334	0.87722	2.76779	0.734592	0.0111778	0.44	0	14.3559	1.11908	0.00212972	0.780605	24.2628	25.1403
M132_MAX_iba1-555_rat-W5-r11_TRANCHE3_ipsi_acq62-2	3.20358	0.0886777	0.0265852	11.2768	0.24324	5.54574	1.50493	1.3128	0.997141	32.9298	0.970527	0.0214889	1.46833	0.666667	207.446	1.24757	0.003415	0.631801	1.01291	1.45106
M133_MAX_iba1-555_rat-W5-r11_L_acq15-1	2.40987	0.22114	0.479313	4.52202	0.381797	2.62025	2.67117	1.85028	0.937766	1.95133	0.661169	0.00741111	0.0783333	1.66667	21.3356	1.0473	0.00136408	0.193601	2.63333	2.73343
M133_MAX_iba1-555_rat-W5-r11_TRANCHE3_ipsi_acq62-2	3.00113	0.111953	0.149764	8.93228	0.351319	5.67708	1.80533	1.49668	1.07229	6.05357	0.858228	0.0131667	0.473333	0.431373	151.867	1.1727	0.00227366	0.205412	2.85563	3.27807
M134_MAX_iba1-555_rat-W5-r11_L_acq15-1	2.79566	0.141832	0.301463	7.05058	0.396878	4.32	2.55122	1.77194	0.972591	2.26503	0.693724	0.0132778	0.338333	1.11111	59.9867	1.17157	0.00244291	0.362465	1.70635	3.59937
M134_MAX_iba1-555_rat-W5-r11_TRANCHE3_ipsi_acq63-3	2.26191	0.26221	0.676857	3.81374	0.441077	2.62121	2.1063	1.58282	1.03489	0.978852	0.494656	0.00727778	0.151667	2.33333	23.9012	1.11149	0.00140573	0.195366	3.699	3.8258
M135_MAX_iba1-555_rat-W5-r11_L_acq15-1	1.74735	0.474164	2.64302	2.10897	0.855946	2.08642	1.41678	1.13587	1.06932	0.306905	0.234834	0.00567778	0.00333333	0	0.208333	1.03615	0.0011913	0.0442374	1.06403	1.22482
M135_MAX_iba1-555_rat-W5-r11_TRANCHE3_ipsi_acq63-3	2.72052	0.154648	0.384542	6.4663	0.44604	4.54386	1.80334	1.39489	1.05216	3.22426	0.763272	0.0127667	0.15	0.4	99.2303	1.17891	0.00242146	0.121637	1.35642	2.26761
M136_MAX_iba1-555_rat-W5-r11_L_acq15-1	2.64667	0.168372	0.23495	5.93922	0.417295	3.88108	2.2054	1.88099	1.01158	3.57874	0.781599	0.0129222	0.22	0.733333	54.7074	1.19533	0.00244897	0.15791	1.33963	5.30966
M136_MAX_iba1-555_rat-W5-r11_TRANCHE3_ipsi_acq63-3	3.21543	0.0874766	0.0367358	11.4316	0.265362	5.60807	1.86259	1.5426	0.952325	20.9619	0.954467	0.0256222	1.43833	0.478723	288.6	1.28404	0.00436812	0.253339	1.31094	3.73932
M137_MAX_iba1-555_rat-W5-r11_L_acq16-1	1.84681	0.422861	1.9316	2.36484	0.854386	2.37179	1.74406	1.38956	1.08505	0.423977	0.297741	0.00541111	0	0	0.993103	1.03287	0.00111431	0	1.80652	1.8237
M137_MAX_iba1-555_rat-W5-r11_TRANCHE3_ipsi_acq64-1	2.29321	0.252931	0.193895	3.95365	0.406491	2.11667	4.30779	2.9504	0.83971	1.62989	0.619756	0.00821111	0.41	0.4	25.941	1.08831	0.00148482	0.626436	2.4399	12.1155
M138_MAX_iba1-555_rat-W5-r11_L_acq16-1	2.25104	0.265512	0.344213	3.76631	0.540845	2.56944	2.37787	1.71696	0.927655	2.8209	0.738281	0.00853333	0.135	0.636364	33.1023	1.06666	0.00163361	0.505181	1.62709	3.27078
M138_MAX_iba1-555_rat-W5-r11_TRANCHE3_ipsi_acq65-1	2.75633	0.148401	0.414917	6.73849	0.459843	4.77703	1.6759	1.35912	1.04542	3.27317	0.765982	0.00973333	0.095	0.888889	67.614	1.13622	0.00174879	0.12182	1.82311	1.88613
M139_MAX_iba1-555_rat-W5-r11_L_acq16-7	2.26796	0.26039	1.4441	3.84039	0.59165	3.25397	1.45726	1.13915	1.10155	0.836032	0.455347	0.0100778	0.035	0.5	16.6804	1.11448	0.00211101	0.0742474	1.15216	1.29041
M139_MAX_iba1-555_rat-W5-r11_TRANCHE3_ipsi_acq65-1	3.21815	0.0872031	0.050576	11.4675	0.208484	5.14072	2.65976	2.0334	0.981791	5.41727	0.84417	0.0198222	2.15333	0.783784	154.266	1.23562	0.00304897	1.01998	5.9272	6.2883
M140_MAX_iba1-555_rat-W5-r11_L_acq16-1	2.90057	0.125696	0.0893691	7.95571	0.276286	4.13141	2.80166	2.12311	0.987961	4.19652	0.807563	0.0232111	1.51	0.586207	97.7095	1.25037	0.00437026	0.666866	7.94723	8.2149
M140_MAX_iba1-555_rat-W5-r11_TRANCHE3_ipsi_acq66-3	3.36039	0.0740307	0.0982876	13.5079	0.233929	6.6358	1.81397	1.50475	1.01569	7.36515	0.880456	0.0224	1.395	0.733333	278.428	1.27426	0.00344766	0.428406	1.50701	1.95838
M141_MAX_iba1-555_rat-W5-r11_L_acq16-1	3.06206	0.10437	0.30031	9.58132	0.311671	5.15531	1.89136	1.36764	0.963788	3.32173	0.768611	0.0344778	1.695	0.727273	176.06	1.34399	0.00696156	0.348562	1.66398	1.73852
M141_MAX_iba1-555_rat-W5-r11_TRANCHE3_ipsi_acq66-3	3.16896	0.0922839	0.0616964	10.8361	0.314412	5.27492	3.48158	2.85499	0.868146	6.27465	0.862536	0.0229556	0.865	0.689655	198	1.28046	0.00405632	0.140873	7.49328	17.5731
M142_MAX_iba1-555_rat-W5-r11_L_acq16-1	3.03551	0.107609	0.171521	9.29291	0.361478	5.96786	1.71133	1.51583	1.06813	5.27561	0.840653	0.0285889	0.738333	0.447761	177.716	1.31325	0.00564057	0.374051	3.61639	3.71576
M142_MAX_iba1-555_rat-W5-r11_TRANCHE3_ipsi_acq66-3	3.11184	0.098557	0.520543	10.1464	0.346262	5.55401	1.90791	1.15176	0.930232	2.43958	0.709267	0.0218222	0.395	0.73913	174.479	1.24171	0.00422741	0.131574	1.05706	1.30503
M143_MAX_iba1-555_rat-W5-r11_L_acq16-1	3.1012	0.0997714	0.137881	10.0229	0.291125	5.37389	2.59771	1.84385	0.993699	3.36639	0.770978	0.0288667	0.943333	0.840909	141.832	1.30891	0.00531883	0.119339	5.37358	5.54918
M143_MAX_iba1-555_rat-W5-r11_TRANCHE3_ipsi_acq67-1	3.02551	0.108856	0.246514	9.18645	0.36014	5.74783	1.64468	1.32165	1.04261	4.33333	0.8125	0.0183111	0.52	0.551724	174.948	1.21943	0.00333123	0.177633	1.28093	1.9089
M144_MAX_iba1-555_rat-W5-r11_L_acq17-1	2.99624	0.112586	0.086455	8.88212	0.33145	5.09507	2.678	2.1489	0.996379	4.28	0.810606	0.0234667	2.265	0.571429	95.809	1.27531	0.00426896	0.827155	10.9718	10.9767
M144_MAX_iba1-555_rat-W5-r11_TRANCHE3_ipsi_acq67-3	3.2429	0.0847534	0.095264	11.7989	0.268087	6.3295	1.46866	1.15768	1.03607	12.2203	0.924359	0.0173333	0.498333	0.877193	199.979	1.24074	0.00265918	0.162117	1.18378	1.21178
M145_MAX_iba1-555_rat-W5-r11_L_acq17-1	2.70927	0.156664	0.0516256	6.38308	0.285125	2.48763	5.35516	3.97204	0.729858	3.86432	0.794421	0.0107556	0.473333	5.5	53.0611	1.15766	0.00164739	0.523221	3.16476	18.1263
M145_MAX_iba1-555_rat-W5-r11_TRANCHE3_ipsi_acq68-3	3.06077	0.104525	0.174917	9.56706	0.426225	5.46091	2.7742	2.40093	0.874313	3.72531	0.788374	0.0170111	0.336667	0.584615	214.649	1.21777	0.00314477	0.130316	1.00796	8.57447
M146_MAX_iba1-555_rat-W5-r11_L_acq17-1	2.86949	0.130275	0.117416	7.67606	0.266349	3.14118	3.87738	2.93824	0.792918	2.07801	0.675114	0.0267444	0.825	1.29412	86.0775	1.30161	0.00526901	0.387808	1.39356	15.4912
M146_MAX_iba1-555_rat-W5-r11_TRANCHE3_ipsi_acq68-1	3.26742	0.0823942	0.108438	12.1368	0.301289	7.3166	1.61684	1.16773	1.09828	9.37433	0.903608	0.0215556	1.22667	0.461538	246.985	1.25284	0.00361885	0.592043	1.80621	1.8616
M147_MAX_iba1-555_rat-W5-r11_L_acq18-1	2.20187	0.280975	0.139616	3.55903	0.508604	2.88119	1.93202	1.53975	1.13514	6.09333	0.859023	0.00591111	0.166667	1	10.4179	1.06759	0.00104613	0.715037	3.11309	4.3378
M147_MAX_iba1-555_rat-W5-r11_TRANCHE3_ipsi_acq68-2	2.84378	0.134188	0.0893259	7.45224	0.411765	4.06276	3.72468	2.92456	0.849591	6.0733	0.858623	0.0150111	0.771667	0.385965	166.897	1.17153	0.0027421	0.310202	6.65315	15.7132
M148_MAX_iba1-555_rat-W5-r11_L_acq18-1	1.74566	0.475089	2.16745	2.10487	0.907236	2.26027	1.50223	1.26761	1.1274	0.365922	0.267894	0.00543333	0	0	0.0687023	1.03301	0.00113323	0.0452216	1.64543	1.69081
M148_MAX_iba1-555_rat-W5-r11_TRANCHE3_ipsi_acq69-3	2.42028	0.218507	0.177846	4.57652	0.482201	3.36275	1.85846	1.48137	1.05814	6.84211	0.872483	0.00496667	0.121667	1.75	31.5923	0.995593	0.000838359	0.105762	3.25707	3.27102
M149_MAX_iba1-555_rat-W5-r11_L_acq18-1	1.87041	0.411527	1.38092	2.42998	0.768246	2.24468	2.10587	1.26443	1.05391	0.886792	0.47	0.00666667	0	0	7.18085	1.07631	0.00137334	0.0408248	1.51119	1.58143
M149_MAX_iba1-555_rat-W5-r11_TRANCHE3_ipsi_acq69-3	3.07171	0.103217	0.211778	9.68836	0.327457	5.83077	1.947	1.35873	1.05172	4.95652	0.832117	0.0121778	0.516667	0.909091	138.965	1.1582	0.00202126	0.333637	1.6125	1.61688
M150_MAX_iba1-555_rat-W5-r11_L_acq18-1	2.3556	0.235398	0.060207	4.24812	0.541896	2.31148	6.4514	5.38357	0.739153	4.75912	0.826362	0.00876667	0.41	1	17.8896	1.06483	0.00156014	0.304175	35.4762	57.4024
M150_MAX_iba1-555_rat-W5-r11_TRANCHE3_ipsi_acq69-2	2.54972	0.188255	0.331151	5.31193	0.495317	3.79739	1.86815	1.34218	1.01576	4.50289	0.818277	0.0105778	0.155	0.26087	58.2401	1.11663	0.00200882	0.27501	1.22282	1.52666
M151_MAX_iba1-555_rat-W5-r11_L_acq18-1	2.60238	0.17718	0.165948	5.64399	0.519467	4.39512	1.76884	1.45165	1.08045	9.0396	0.900394	0.0225333	0.661667	0.365854	86.3138	1.23879	0.00485398	0.378151	2.21665	2.57979
M151_MAX_iba1-555_rat-W5-r11_TRANCHE3_ipsi_acq70-1	3.23644	0.0853856	0.0238867	11.7116	0.198121	4.84247	2.19887	1.75867	0.928935	13.321	0.930172	0.0128889	1.62833	0.837209	172.16	1.17779	0.00181986	0.762256	2.80216	5.17137
M152_MAX_iba1-555_rat-W5-r11_L_acq18-1	2.54954	0.188294	0.0697473	5.31085	0.348285	2.736	3.28516	2.61736	0.87294	4.3012	0.811364	0.0146667	0.721667	0.466667	43.563	1.19817	0.00272704	0.909962	1.01637	16.8075
M152_MAX_iba1-555_rat-W5-r11_TRANCHE3_ipsi_acq70-1	2.24977	0.265902	0.203465	3.76078	0.550697	2.53548	3.40679	2.89061	0.908504	2.95	0.746835	0.00965556	0.126667	0.285714	22.188	1.06725	0.00188442	0.0339227	12.0695	12.4465
M153_MAX_iba1-555_rat-W5-r11_L_acq19-1	2.08634	0.32095	0.960339	3.11575	0.735108	2.66	2.08405	1.67636	0.995734	0.864952	0.463793	0.00644444	0.03	0.4	7.86617	1.07378	0.00128951	0.207614	1.36251	3.16328
M153_MAX_iba1-555_rat-W5-r11_TRANCHE3_ipsi_acq70-1	1.76939	0.462284	1.54679	2.16317	0.842262	2.08065	1.95613	1.60338	1.04805	0.521505	0.342756	0.00314444	0	0	1.48454	0.935507	0.000581715	0.0594438	1.2427	2.54886
M154_MAX_iba1-555_rat-W5-r11_L_acq19-1	2.51191	0.19663	0.160425	5.08568	0.39819	2.69547	3.45342	2.27239	0.839925	3.125	0.757576	0.0146667	0.325	1.33333	21.025	1.16997	0.00285577	0.249241	6.13432	8.5593
M154_MAX_iba1-555_rat-W5-r11_TRANCHE3_ipsi_acq71-4	2.36613	0.232561	0.176013	4.29994	0.335714	2.1658	3.12981	2.0219	0.869304	2.21368	0.68883	0.00835556	0.415	0.833333	22.1023	1.04125	0.00144677	0.593628	2.61428	4.43303
M155_MAX_iba1-555_rat-W5-r11_L_acq19-1	2.01831	0.347095	0.310777	2.88106	0.712792	2.04027	4.62477	3.47432	0.838792	1.59064	0.613995	0.00984444	0.08	0.2	9.79596	1.10766	0.0020172	0.212478	9.35045	17.1747
M155_MAX_iba1-555_rat-W5-r11_TRANCHE3_ipsi_acq71-4	2.71527	0.155585	0.112505	6.42735	0.317545	3.28505	3.50338	2.61027	0.906999	2.53903	0.717437	0.0105778	0.535	0.916667	51.1991	1.12166	0.00171473	0.791233	4.46553	7.57897
M156_MAX_iba1-555_rat-W5-r11_L_acq19-1	2.80421	0.140442	0.300689	7.12036	0.314947	3.79182	2.69274	1.74832	0.948914	1.84	0.647887	0.0181444	0.613333	0.857143	66.8771	1.19922	0.0034764	0.297983	2.7441	2.85798
M156_MAX_iba1-555_rat-W5-r11_TRANCHE3_ipsi_acq71-4	2.91893	0.123066	0.100187	8.12572	0.270522	4.08835	2.65481	1.94211	0.967354	6.01685	0.857486	0.0138778	0.425	0.575758	115.034	1.15843	0.00241211	0.233331	2.86143	3.65212
M157_MAX_iba1-555_rat-W5-r11_L_acq19-5	2.87627	0.129261	0.0222351	7.73628	0.190597	3.15193	3.56108	2.31511	0.933227	7.7868	0.886193	0.0192333	1.75	0.666667	69.2803	1.21827	0.00330864	0.999711	10.0294	11.2196
M157_MAX_iba1-555_rat-W5-r11_TRANCHE3_ipsi_acq71-4	3.09432	0.100565	0.167495	9.94386	0.332878	5.94275	1.68696	1.32595	1.03583	6.86694	0.872886	0.0216778	0.656667	0.605634	209.985	1.24879	0.00389002	0.324152	1.30689	1.64971
M158_MAX_iba1-555_rat-W5-r11_L_acq20-2	2.35953	0.234335	0.172086	4.26739	0.54023	2.85714	3.96786	2.92647	0.91092	2.61538	0.723404	0.0094	0.191667	1.33333	19.7712	1.0865	0.00173618	0.678094	12.3778	13.7068
M158_MAX_iba1-555_rat-W5-r11_TRANCHE3_ipsi_acq72-2	3.3001	0.0793512	0.189048	12.6022	0.34277	8.12261	1.62588	1.40438	1.1009	5.10298	0.836146	0.0250222	0.913333	0.785714	244.123	1.29737	0.00420262	0.368015	1.00924	1.92639
M159_MAX_iba1-555_rat-W5-r11_L_acq20-2	2.0859	0.321112	1.25626	3.11418	0.845819	3.07143	1.99308	1.60994	1.0724	0.784926	0.439753	0.0107889	0.025	0.125	17.726	1.11675	0.00240605	0.0717588	2.38971	2.65058
M159_MAX_iba1-555_rat-W5-r11_TRANCHE3_ipsi_acq72-2	3.00633	0.111286	0.169138	8.98588	0.297182	5.30943	1.4508	1.10656	1.08387	7.26695	0.879036	0.0216778	0.46	0.349206	166.272	1.25511	0.00394619	0.295186	1.37264	1.49015
M159_MAX_iba1-555_rat-W5-r11_TRANCHE3_ipsi_acq72	3.00633	0.111286	0.169138	8.98588	0.297182	5.30943	1.4508	1.10656	1.08387	7.26695	0.879036	0.0216778	0.46	0.349206	166.272	1.25511	0.00394619	0.295186	1.37264	1.49015
M160_MAX_iba1-555_rat-W5-r11_TRANCHE4_ipsi_acq1.czi - C=0-1	2.51068	0.196909	0.473624	5.07848	0.50858	3.99291	1.78717	1.34225	1.10249	2.41958	0.707566	0.0108667	0.06	0.47619	51.0751	1.11553	0.00211857	0.159882	1.37721	2.03154
M161_MAX_iba1-555_rat-W5-r11_TRANCHE4_ipsi_acq2.czi - C=0-1	1.99959	0.35466	0.723366	2.81961	0.730656	2.39474	3.26366	2.50911	0.993603	0.879093	0.467828	0.00828889	0.0283333	1.5	6.32951	1.07401	0.001723	0.155334	5.87432	5.8878
M162_MAX_iba1-555_rat-W5-r11_TRANCHE4_ipsi_acq2.czi - C=0-1	1.74782	0.47391	2.34063	2.11011	0.844311	1.99153	1.6325	1.32469	1.02714	0.302111	0.232016	0.0109667	0.00333333	1	2.31004	1.16706	0.00253041	0.0318304	1.51505	1.55917
M163_MAX_iba1-555_rat-W5-r11_TRANCHE4_ipsi_acq2.czi - C=0-1	2.0735	0.325727	1.01108	3.07006	0.759174	2.65772	2.51807	2.11702	0.993555	0.506257	0.336103	0.0147111	0.035	0.2	15.1101	1.13392	0.0033607	0.122905	5.03143	5.32964
M164_MAX_iba1-555_rat-W5-r11_TRANCHE4_ipsi_acq2.czi - C=0-1	1.72124	0.488633	2.26555	2.04652	0.943574	2.25316	1.59505	1.32219	1.13341	0.294624	0.227575	0.00668889	0	0	0	1.07272	0.00145187	0.040757	1.38038	1.77003
M165_MAX_iba1-555_rat-W5-r11_TRANCHE4_ipsi_acq3.czi - C=0-1	1.86101	0.416004	1.81459	2.40382	0.758095	2.1519	1.60367	1.17141	1.02815	0.611336	0.379397	0.00442222	0.00333333	1	3.2053	0.998441	0.000863804	0.0708881	1.40134	1.40135
M166_MAX_iba1-555_rat-W5-r11_TRANCHE4_ipsi_acq4.czi - C=0-2	2.2646	0.261399	0.258159	3.82556	0.702179	2.75862	3.67929	3.00406	0.860543	2.67089	0.727586	0.00966667	0.118333	0.176471	32.7583	1.11338	0.00195948	0.0479463	3.1849	13.5559
M167_MAX_iba1-555_rat-W5-r11_TRANCHE4_ipsi_acq4.czi - C=0-2	2.94121	0.11995	0.170102	8.33679	0.407012	5.08118	1.88511	1.41471	0.955349	6.78136	0.871488	0.0241222	0.52	0.333333	185.861	1.26265	0.00473034	0.109435	1.2252	2.02244
M168_MAX_iba1-555_rat-W5-r11_TRANCHE4_ipsi_acq5.czi - C=0-2	2.50109	0.199094	0.398572	5.02275	0.535798	3.47097	2.8818	2.27866	0.944078	1.79205	0.64184	0.0101444	0.0666667	0.5	55.9061	1.10681	0.00196442	0.240936	3.08987	6.43737
M169_MAX_iba1-555_rat-W5-r11_TRANCHE4_ipsi_acq5.czi - C=0-2	2.78248	0.144	0.828865	6.94444	0.554615	5.5	1.46311	1.165	1.06348	2.23457	0.69084	0.0145556	0.0416667	0.485714	103.465	1.18059	0.00297357	0.0276289	1.21487	1.22104
M170_MAX_iba1-555_rat-W5-r11_TRANCHE4_ipsi_acq6.czi - C=0-3	1.80135	0.445584	1.61823	2.24424	0.868421	2.28	1.8276	1.53806	1.09018	0.387387	0.279221	0.00513333	0	0	0.937984	1.01512	0.00104416	0.104031	2.09785	2.85119
M171_MAX_iba1-555_rat-W5-r11_TRANCHE4_ipsi_acq6.czi - C=0-3	2.78617	0.14339	0.148921	6.97398	0.216674	2.75	3.63153	2.79551	0.847127	1.45209	0.592184	0.0110889	0.446667	1	77.489	1.12112	0.00183041	0.184576	6.72397	8.05609
M172_MAX_iba1-555_rat-W5-r11_TRANCHE4_ipsi_acq6.czi - C=0-3	2.45137	0.210825	0.222795	4.74328	0.408634	2.37634	4.42751	3.13229	0.783725	1.54044	0.606368	0.00767778	0.175	1	24.3461	1.05441	0.0013331	0.152167	4.80776	11.2524
M173_MAX_iba1-555_rat-W5-r11_TRANCHE4_ipsi_acq7.czi - C=0-1	2.73492	0.152106	0.377106	6.57438	0.400123	3.74554	3.11521	1.87861	0.900663	1.75745	0.637346	0.0144	0.09	0.875	74.46	1.17745	0.00275171	0.177865	2.74572	3.33912
M174_MAX_iba1-555_rat-W5-r11_TRANCHE4_ipsi_acq7.czi - C=0-1	2.39158	0.225847	0.496422	4.42778	0.401618	2.70787	2.65468	1.65876	0.965015	1.02361	0.505832	0.0104778	0.19	0.8	31.717	1.12851	0.0020133	0.248004	2.33938	3.0341
M175_MAX_iba1-555_rat-W5-r11_TRANCHE4_ipsi_acq8.czi - C=0-3	2.22263	0.274341	0.598616	3.6451	0.654267	2.90977	2.1957	1.6895	0.986897	1.49167	0.598662	0.00996667	0.128333	0.833333	33.9385	1.11298	0.00209822	0.307832	1.667	4.34862
M176_MAX_iba1-555_rat-W5-r11_TRANCHE4_ipsi_acq8.czi - C=0-3	2.15721	0.295801	1.70061	3.38065	0.703156	2.88288	1.68823	1.23581	1.01695	0.739024	0.424965	0.00792222	0.01	0.833333	19.0627	1.12182	0.00164359	0.112351	1.27153	1.28875
M177_MAX_iba1-555_rat-W5-r11_TRANCHE4_ipsi_acq8.czi - C=0-3	2.2103	0.278263	0.79465	3.59372	0.55	2.29936	3.18589	2.60057	0.862744	0.712154	0.41594	0.00892222	0.0416667	0	12.2635	1.09715	0.00181604	0.0499065	1.54655	4.13464
M179_MAX_iba1-555_rat-W5-r11_TRANCHE4_ipsi_acq9.czi - C=0-1	2.97512	0.115358	0.320884	8.66868	0.425092	5.63784	1.9422	1.20683	0.997511	4.16592	0.806424	0.0128	0.133333	0.470588	144.983	1.16994	0.00223357	0.0416667	1.46128	1.51634
M180_MAX_iba1-555_rat-W5-r11_TRANCHE4_ipsi_acq10.czi - C=0-3	2.5998	0.177707	0.108614	5.62725	0.237404	2.62646	2.21799	1.2887	0.957923	4.84184	0.828821	0.0127222	0.361667	0.666667	37.6407	1.13802	0.00222329	0.177316	1.1655	1.95187
M181_MAX_iba1-555_rat-W5-r11_TRANCHE4_ipsi_acq10.czi - C=0-3	2.61903	0.173816	0.146749	5.75321	0.388706	3.58919	2.85175	2.60701	1.00064	2.33333	0.7	0.0117778	0.546667	0.473684	59.434	1.12358	0.00221058	0.480762	11.7898	13.8313
M182_MAX_iba1-555_rat-W5-r11_TRANCHE4_ipsi_acq10.czi - C=0-3	2.79583	0.141804	0.286882	7.05199	0.428532	4.70476	1.79934	1.40685	1.01914	3.38764	0.772087	0.0173556	0.333333	0.375	119.105	1.21245	0.00337594	0.282888	1.08807	2.66834
M183_MAX_iba1-555_rat-W5-r11_TRANCHE4_ipsi_acq11.czi - C=0-3	2.69446	0.159359	0.197783	6.27514	0.272972	3.27778	1.90223	1.52879	0.999762	2.08841	0.676209	0.0112556	0.63	0.4	49.4248	1.11801	0.00200222	0.636191	3.88285	4.82096
M184_MAX_iba1-555_rat-W5-r11_TRANCHE4_ipsi_acq11.czi - C=0-3	3.30483	0.0789203	0.0969642	12.671	0.333973	7.92278	1.64714	1.2282	1.08196	9.08213	0.900815	0.0231889	1.4	0.576923	204.468	1.27616	0.0037154	0.61952	1.88885	2.15085
M185_MAX_iba1-555_rat-W5-r11_TRANCHE4_ipsi_acq12.czi - C=0-2	3.22285	0.0867319	0.0293533	11.5298	0.330409	6.42808	2.49717	1.92222	0.969917	23.8118	0.959697	0.0234333	1.22333	0.435897	242.787	1.27419	0.00382084	0.413155	1.30723	4.12067
M186_MAX_iba1-555_rat-W5-r11_TRANCHE4_ipsi_acq12.czi - C=0-2	3.22149	0.0868675	0.0563694	11.5118	0.301939	6.00702	2.34652	1.98653	0.949636	10.5789	0.913636	0.0195556	1.525	0.685714	243.704	1.23602	0.00321985	0.650612	2.72405	4.19619
M187_MAX_iba1-555_rat-W5-r11_TRANCHE4_ipsi_acq12.czi - C=0-2	2.8453	0.133954	0.155287	7.46524	0.339068	4.13504	2.31826	1.68169	0.951245	3.15646	0.759411	0.0203667	0.786667	0.4	172.486	1.24683	0.00392594	0.453513	1.51552	4.99744
M188_MAX_iba1-555_rat-W5-r11_TRANCHE4_ipsi_acq13.czi - C=0-1	3.04896	0.105956	0.219828	9.43789	0.367572	5.7381	2.21797	1.85058	1.00282	4.54303	0.819593	0.0207556	0.565	0.666667	232.016	1.24014	0.0037827	0.258682	1.36103	2.43017
M189_MAX_iba1-555_rat-W5-r11_TRANCHE4_ipsi_acq14.czi - C=0-2	2.09879	0.316382	0.737215	3.16073	0.587648	2.47826	2.32935	1.47023	1.02282	1.09385	0.522411	0.00718889	0.0533333	1	9.95266	1.05387	0.00141146	0.19657	2.5736	2.77012
M190_MAX_iba1-555_rat-W5-r11_TRANCHE4_ipsi_acq14.czi - C=0-2	1.93724	0.381053	0.73267	2.6243	0.738017	2.46018	1.7258	1.44982	1.09124	2.18929	0.68645	0.00992222	0.0233333	0.363636	24.6803	1.10869	0.00215367	0.195125	1.05682	2.19763
iba1-555_rat-W5-r11_ipsi_TRANCHEipsi_EL_acq1	2.9487	0.118919	0.272919	8.40906	0.404834	5.80952	1.65616	1.24361	1.08581	5.57669	0.847948	0.0119111	0.248333	0.682927	133.228	1.15933	0.00201645	0.178091	1.04396	1.27185

## Sheet: input_MorphoCellSorter
microglia	PerimeterAreaRatio	ModifiedCircularity	RoundnessFactor	RamificationIndex	Solidity	Convexity	ConvexHullRadiiRatio	SpanRatio	ConvexHullCircularity	ProcessesSomaAreasRatio	ProcessesCellAreasRatio	Density	BranchingIndex	EndpointsBranchpointsRatio	SkeletonProcessesRatio	FractalDimension	LacunaritySlope	PolarizationIndex	Linearity	Inertia
M001_MAX_iba1-555_rat-W5-r11_EL_acq1	3.82853	23.1557	25.9859	23.1557	3.83716	12.4449	0.0384824	0.0384824	1.05278	22.531	0.957503	0.0590889	5.31	0.833333	719.441	1.47233	0.00848925	0.322761	1.53493	1.88915
M001_MAX_iba1-555_rat-W5-r11_contro_TRANCHE3_acq1.czi - C=0-1	3.61581	18.1259	17.6837	18.1259	4.19015	9.53719	0.0565493	0.0565493	1.07705	14.8634	0.936962	0.0322556	1.73667	0.728155	489.601	1.36446	0.00457958	0.117383	1.56615	1.938
M002_MAX_iba1-555_rat-W5-r11_EL_acq1	3.75272	21.2205	21.7081	21.2205	3.20292	11.9704	0.0460658	0.0460658	1.00955	22.5819	0.957595	0.0463778	1.805	0.681081	652.546	1.4163	0.00728419	0.0978935	1.71267	2.29284
M002_MAX_iba1-555_rat-W5-r11_contro_TRANCHE3_acq1.czi - C=0-1	3.60586	17.9195	14.9413	17.9195	4.07396	9.74	0.0669288	0.0669288	1.09709	11.5217	0.920139	0.032	1.76833	0.633333	514.802	1.34846	0.00451207	0.401386	2.33846	2.33847
M003_MAX_iba1-555_rat-W5-r11_EL_acq2.czi - C=0	3.75727	21.332	18.5194	21.332	3.2448	11.7215	0.0539973	0.0539973	0.989794	18.984	0.94996	0.0555111	1.60667	0.669903	728.951	1.45392	0.00849839	0.192431	1.30658	2.03453
M003_MAX_iba1-555_rat-W5-r11_contro_TRANCHE3_acq1.czi - C=0-1	3.71053	20.2143	16.9027	20.2143	5.15677	9.43694	0.0591623	0.0591623	1.06013	11.5238	0.920152	0.0379889	3.225	0.981481	556.366	1.38953	0.00513956	0.261053	1.1125	1.88192
M004_MAX_iba1-555_rat-W5-r11_EL_acq2.czi - C=0	3.80215	22.4632	22.5039	22.4632	4.90199	10.9682	0.0444368	0.0444368	1.08106	16.8301	0.943915	0.0408111	2.23667	1.13333	597.266	1.40436	0.00539013	0.0660008	1.66483	2.18389
M004_MAX_iba1-555_rat-W5-r11_contro_TRANCHE3_acq2.czi - C=0-2	3.4114	14.325	15.3956	14.325	4.44111	6.68966	0.0649535	0.0649535	0.984137	7.33019	0.879955	0.0196222	1.41667	1.23529	254.595	1.26433	0.00277471	0.11898	4.31385	5.08436
M005_MAX_iba1-555_rat-W5-r11_EL_acq2.czi - C=0	3.82141	22.9668	23.3744	22.9668	3.64144	13.2069	0.0427819	0.0427819	1.09733	26.9104	0.964171	0.0415556	2.12833	0.846995	816.599	1.41394	0.00579024	0.0880569	1.16922	1.42703
M005_MAX_iba1-555_rat-W5-r11_contro_TRANCHE3_acq2.czi - C=0-2	3.6611	19.0961	37.3949	19.0961	4.45348	8.86801	0.0267416	0.0267416	0.980011	22.1689	0.956839	0.0381	2.93167	0.761538	554.648	1.37933	0.00551995	0.174154	1.45772	3.11445
M006_MAX_iba1-555_rat-W5-r11_EL_acq3.czi - C=0-2	3.84126	23.4978	16.687	23.4978	3.78463	12.3133	0.0599268	0.0599268	1.01944	14.5263	0.935593	0.0491667	3.47667	0.877778	732.145	1.43363	0.00700687	0.106299	1.51591	2.06869
M006_MAX_iba1-555_rat-W5-r11_contro_TRANCHE3_acq3.czi - C=0-3	3.57238	17.2419	19.3626	17.2419	4.63265	8.1359	0.0516459	0.0516459	1.01563	11.1946	0.917996	0.0299444	1.89833	1.04464	542.959	1.34529	0.00401029	0.245176	3.19518	3.2771
M007_MAX_iba1-555_rat-W5-r11_EL_acq3.czi - C=0-2	3.81279	22.74	30.1252	22.74	3.82481	12.9758	0.0331948	0.0331948	1.11596	29.2109	0.966899	0.0493444	2.93667	0.915663	730.424	1.44103	0.00680467	0.16777	1.54454	1.67325
M007_MAX_iba1-555_rat-W5-r11_contro_TRANCHE3_acq3.czi - C=0-3	3.56257	17.0483	25.1017	17.0483	4.99275	8.38482	0.0398379	0.0398379	1.09896	19.4766	0.951164	0.0291222	1.845	0.865169	443.081	1.33065	0.00397808	0.303232	1.71484	1.73824
M008_MAX_iba1-555_rat-W5-r11_EL_acq4.czi - C=0-1	3.60573	17.9167	14.3969	17.9167	4.40758	8.48232	0.0694593	0.0694593	0.993931	11.3216	0.918842	0.0310778	1.53333	1.38889	388.327	1.35102	0.00418411	0.119587	1.60112	1.66473
M008_MAX_iba1-555_rat-W5-r11_contro_TRANCHE3_acq3.czi - C=0-3	3.35178	13.3748	14.2148	13.3748	3.48222	7.5	0.070349	0.070349	1.04641	13.6555	0.931766	0.0193778	0.696667	0.558442	275.422	1.25224	0.00297056	0.227168	1.90247	2.13547
M009_MAX_iba1-555_rat-W5-r11_EL_acq4.czi - C=0-2	3.53107	16.4411	8.50512	16.4411	4.23267	7.84115	0.117576	0.117576	0.981195	6.96716	0.874485	0.0296556	1.08667	1.43077	346.273	1.33799	0.00416941	0.136871	1.02172	1.57735
M009_MAX_iba1-555_rat-W5-r11_contro_TRANCHE3_acq4.czi - C=0-1	3.66727	19.2322	13.8247	19.2322	3.90041	9.91644	0.0723345	0.0723345	1.01831	11.1841	0.917926	0.0323556	1.54167	0.865546	540.518	1.35139	0.00458763	0.165748	1.67478	2.23231
M010_AX_iba1-555_rat-W5-r11_EL_acq4.czi - C=0-3	3.50598	15.9729	9.14612	15.9729	3.82458	8.13441	0.109336	0.109336	0.99594	7.98113	0.888655	0.0317333	1.23	0.711111	368.435	1.34297	0.00481037	0.136226	1.19731	1.59463
M010_MAX_iba1-555_rat-W5-r11_contro_TRANCHE3_cq5.czi - C=0-3	3.47666	15.4427	20.6031	15.4427	5.11225	6.29688	0.0485363	0.0485363	0.921952	12.363	0.925167	0.0216778	1.86167	1.22	333.616	1.27712	0.00270558	0.384876	1.09782	1.9808
M011_MAX_iba1-555_rat-W5-r11_EL_acq5.czi - C=0-1	3.58047	17.4032	28.5073	17.4032	5.07644	7.96923	0.0350787	0.0350787	1.03173	17.1286	0.944838	0.0282	2.12333	1.18667	401.318	1.33608	0.00362643	0.362223	1.16628	2.2379
M011_MAX_iba1-555_rat-W5-r11_contro_TRANCHE3_acq5.czi - C=0-3	3.8561	23.9025	33.4933	23.9025	4.07554	12.192	0.0298567	0.0298567	1.02973	31.1491	0.968895	0.0575111	3.85	0.723618	800.801	1.46437	0.00799276	0.242746	1.52631	1.55206
M012_MAX_iba1-555_rat-W5-r11_EL_acq5.czi - C=0-2	3.64538	18.7537	17.2396	18.7537	4.62448	8.72263	0.0580061	0.0580061	1.00021	13.1854	0.929505	0.0323111	2.075	0.819149	447.651	1.35487	0.0044373	0.131126	1.54591	1.79111
M012_MAX_iba1-555_rat-W5-r11_contro_TRANCHE3_acq5.czi - C=0-3	3.67213	19.3402	16.1335	19.3402	4.52169	9.15473	0.0619829	0.0619829	1.00655	12.1098	0.923721	0.0371444	2.155	0.719424	572.83	1.37454	0.00541906	0.244595	1.33458	2.48107
M013_MAX_iba1-555_rat-W5-r11_EL_acq5.czi - C=0-3	3.37553	13.7455	6.36587	13.7455	3.46161	7.99301	0.157088	0.157088	1.0819	7.24345	0.878692	0.0244556	0.811667	0.653846	295.52	1.30665	0.00388642	0.171849	1.54392	1.54998
M013_MAX_iba1-555_rat-W5-r11_contro_TRANCHE3_acq7.czi - C=0-1	3.60555	17.9131	18.7947	17.9131	4.07551	9.38919	0.0532064	0.0532064	1.05815	13.3894	0.930505	0.0332556	2.58667	1.10256	395.871	1.36782	0.00488852	0.26362	2.59832	2.8547
M014_MAX_iba1-555_rat-W5-r11_EL_acq6.czi - C=0-1	3.62158	18.2468	25.7471	18.2468	4.81942	8.40049	0.0388393	0.0388393	1.01068	17.1203	0.944813	0.0318111	1.93333	1.8375	440.03	1.36699	0.00411209	0.0747566	2.7104	2.72387
M014_MAX_iba1-555_rat-W5-r11_contro_TRANCHE3_acq6.czi - C=0-2	3.49106	15.7009	18.1902	15.7009	4.55159	7.37978	0.0549748	0.0549748	1.00277	11.8689	0.922293	0.0261667	1.24667	0.964912	346.88	1.30622	0.00367806	0.194401	2.55676	2.7256
M015_MAX_iba1-555_rat-W5-r11_EL_acq7.czi - C=0-1	3.60967	17.9982	12.1005	17.9982	4.6248	8.98724	0.0826412	0.0826412	1.07385	9.40614	0.903903	0.0338778	2.005	1	465.78	1.3638	0.00480224	0.257393	1.48952	1.55706
M015_MAX_iba1-555_rat-W5-r11_contro_TRANCHE3_acq6.czi - C=0-2	3.73331	20.7516	20.7304	20.7516	4.94415	9.21199	0.0482383	0.0482383	0.987068	15.3636	0.938889	0.038	1.82667	0.902439	550.888	1.38271	0.00522382	0.208728	1.57517	1.60095
M016_MAX_iba1-555_rat-W5-r11_EL_acq7.czi - C=0-2	3.52495	16.3256	11.9706	16.3256	4.48869	7.42105	0.0835382	0.0835382	0.963066	9.1162	0.901149	0.0319222	1.73167	1.24	381.628	1.34667	0.004451	0.200938	1.48438	1.66545
M016_MAX_iba1-555_rat-W5-r11_contro_TRANCHE3_acq9.czi - C=0-1	3.53565	16.528	17.763	16.528	5.16278	7.42547	0.0562968	0.0562968	1.02081	13.58	0.931413	0.0243	1.24167	1.6	337.379	1.29523	0.00320078	0.172398	1.11577	1.28519
M017_MAX_iba1-555_rat-W5-r11_EL_acq7.czi - C=0-3	3.68353	19.5957	19.9019	19.5957	4.65562	8.45415	0.0502463	0.0502463	0.930891	19.0452	0.950113	0.0345222	2.38667	0.857143	551.55	1.36761	0.00466059	0.289834	1.22332	1.29564
M017_MAX_iba1-555_rat-W5-r11_contro_TRANCHE3_acq11.czi - C=0-1	3.61048	18.0149	37.2237	18.0149	4.20172	9.12997	0.0268646	0.0268646	1.03884	24.708	0.961102	0.0322778	2.60167	0.864078	452.499	1.3522	0.00458341	0.112857	3.39792	3.40008
M018_MAX_iba1-555_rat-W5-r11_EL_acq8.czi - C=0-2	3.56098	17.0171	15.8981	17.0171	4.09125	9.44904	0.0629005	0.0629005	1.12313	15.4112	0.939066	0.0359222	1.79667	0.764706	365.914	1.37236	0.00533651	0.186955	1.43668	1.58482
M018_MAX_iba1-555_rat-W5-r11_contro_TRANCHE3_acq13.czi - C=0-5	3.57211	17.2366	20.2789	17.2366	4.22023	8.8318	0.0493124	0.0493124	1.05261	16.0534	0.941361	0.0248222	1.74167	0.741935	404.224	1.29842	0.00340401	0.26762	1.66221	2.02938
M019_MAX_iba1-555_rat-W5-r11_EL_acq8.czi - C=0-1	3.56561	17.108	20.7312	17.108	3.86765	9.47664	0.0482364	0.0482364	1.08938	16	0.941176	0.0279556	1.09333	1.14286	357.432	1.33646	0.00393217	0.127655	2.12992	2.40432
M019_MAX_iba1-555_rat-W5-r11_contro_TRANCHE3_acq13.czi - C=0-5	3.63948	18.6267	16.788	18.6267	3.20006	10.6456	0.0595663	0.0595663	1.02238	15.4	0.939024	0.0382667	1.46167	0.468927	625.258	1.37562	0.00595035	0.0702575	1.63808	2.70754
M020_MAX_iba1-555_rat-W5-r11_EL_acq9.czi - C=0-1	3.32958	13.0372	8.03638	13.0372	3.08227	7.56981	0.124434	0.124434	1.01938	7.6422	0.884289	0.0209333	0.913333	0.94	229.989	1.26147	0.00332371	0.206065	1.50477	2.59851
M020_MAX_iba1-555_rat-W5-r11_contro_TRANCHE3_acq13.czi - C=0-5	3.63067	18.4386	10.7004	18.4386	3.77836	9.91489	0.0934544	0.0934544	1.04523	12.17	0.92407	0.0361444	1.83167	0.540146	563.94	1.36775	0.0052775	0.214018	1.07178	1.0994
M021_MAX_iba1-555_rat-W5-r11_EL_acq9.czi - C=0-2	3.52148	16.2606	11.4414	16.2606	4.22823	8.67213	0.0874017	0.0874017	1.09665	10.1882	0.91062	0.0336889	1.09167	0.922078	311.91	1.3498	0.00508659	0.203044	1.26241	1.68426
M021_MAX_iba1-555_rat-W5-r11_contro_TRANCHE3_acq13.czi - C=0-5	3.54251	16.659	12.5676	16.659	3.84703	9.26531	0.0795695	0.0795695	1.09087	11.8142	0.921961	0.0321778	1.57667	0.74	398.113	1.34555	0.00483474	0.232836	1.80879	1.80907
M022_MAX_iba1-555_rat-W5-r11_EL_acq9.czi - C=0-3	3.46918	15.3103	14.4439	15.3103	4.45306	7.24438	0.0692333	0.0692333	0.998495	7.78599	0.886182	0.0250889	1.27333	1.16129	294.765	1.30247	0.00361913	0.105222	4.12018	4.12046
M022_MAX_iba1-555_rat-W5-r11_contro_TRANCHE3_acq13.czi - C=0-5	3.7894	22.1359	36.0058	22.1359	3.99391	11.9322	0.0277733	0.0277733	1.07727	22.3373	0.95715	0.0438222	3.21667	0.61809	728.202	1.35577	0.00626869	0.356055	3.23716	3.54317
M023_MAX_iba1-555_rat-W5-r11_EL_tranche2_acq1-1	3.60395	17.8802	10.5865	17.8802	4.03498	8.68342	0.0944596	0.0944596	0.975529	10.751	0.914901	0.0330333	1.09167	1.33784	353.088	1.35457	0.00481565	0.115993	1.0247	1.73111
M023_MAX_iba1-555_rat-W5-r11_contro_TRANCHE3_acq14.czi - C=0-2-1	3.66752	19.2378	14.6501	19.2378	3.23813	11.7514	0.0682587	0.0682587	1.09921	17.3937	0.945633	0.0451667	2.505	0.482558	618.565	1.40806	0.00726863	0.257244	1.40949	1.63933
M024_MAX_iba1-555_rat-W5-r11_EL_tranche2_acq1-3	3.62857	18.3941	17.789	18.3941	3.27545	10.7507	0.0562146	0.0562146	1.05778	20.3613	0.953186	0.0367889	1.77667	0.768519	437.46	1.3723	0.00556109	0.088615	1.69896	1.69896
M024_MAX_iba1-555_rat-W5-r11_contro_TRANCHE3_acq14.czi - C=0-2-1	3.57201	17.2347	25.6545	17.2347	3.7426	8.82564	0.0389796	0.0389796	0.990673	21.5106	0.955577	0.0352667	2.43333	0.489655	527.605	1.35874	0.00518398	0.19845	1.64369	2.02007
M025_MAX_iba1-555_rat-W5-r11_EL_tranche2_acq1-2	3.56045	17.0067	25.2372	17.0067	4.66501	7.9383	0.0396241	0.0396241	1.00817	16.6498	0.943342	0.0425556	3.075	0.942857	469.917	1.41482	0.00619608	0.399085	2.24022	2.39115
M025_MAX_iba1-555_rat-W5-r11_contro_TRANCHE3_acq15.czi - C=0-4	3.61864	18.1851	13.1227	18.1851	3.415	10.5195	0.0762038	0.0762038	1.06899	18.1602	0.947808	0.0438556	2.75167	0.581395	600.642	1.4036	0.00681393	0.191668	1.0883	1.08847
M026_MAX_iba1-555_rat-W5-r11_EL_tranche2_acq4-2	3.54029	16.6164	12.9455	16.6164	3.42815	9.53666	0.0772468	0.0772468	1.06264	12.0256	0.923228	0.0338667	1.55333	1.81967	310.67	1.3562	0.00510408	0.236166	1.2645	2.23848
M026_MAX_iba1-555_rat-W5-r11_contro_TRANCHE3_acq15.czi - C=0-4	3.67535	19.412	16.4934	19.412	3.92701	10.368	0.0606303	0.0606303	1.05841	13.7538	0.932221	0.0319667	1.81667	0.747826	517.406	1.34529	0.00455736	0.266936	1.36425	2.38853
M027_MAX_iba1-555_rat-W5-r11_EL_tranche2_acq4-2	3.83562	23.3455	31.6003	23.3455	4.22678	12.2423	0.0316453	0.0316453	1.07811	31.4375	0.969171	0.0576667	3.63167	1.1747	666.513	1.4654	0.00802164	0.198744	1.44895	1.49859
M027_MAX_iba1-555_rat-W5-r11_contro_TRANCHE3_acq15.czi - C=0-4	3.5531	16.8634	9.55001	16.8634	4.1898	8.76524	0.104712	0.104712	1.06394	9.23451	0.902291	0.0257	1.295	0.648352	375.287	1.30305	0.0036653	0.167637	1.00923	1.13212
M028_MAX_iba1-555_rat-W5-r11_EL_tranche2_acq5-2	3.74544	21.0435	16.3541	21.0435	3.67112	11.9169	0.0611467	0.0611467	1.08504	18.1435	0.947763	0.0474333	2.665	0.701149	622.484	1.42478	0.0070369	0.227527	1.46782	1.48111
M028_MAX_iba1-555_rat-W5-r11_contro_TRANCHE3_acq15.czi - C=0-4	3.75375	21.2457	18.693	21.2457	3.57265	12.3016	0.0534959	0.0534959	1.09443	19.1844	0.950457	0.0401444	2.34167	0.607955	657.836	1.39249	0.00580858	0.263049	1.64892	1.65085
M029_MAX_iba1-555_rat-W5-r11_EL_tranche2_acq5-2	3.56293	17.0554	15.3454	17.0554	3.40621	9.73968	0.0651662	0.0651662	1.05395	14.512	0.935534	0.0286111	1.58	0.724138	385.76	1.33216	0.00417863	0.350866	1.89098	1.89394
M029_MAX_iba1-555_rat-W5-r11_contro_TRANCHE3_acq16.czi - C=0-5	3.53852	16.5826	23.7532	16.5826	5.33934	7.30789	0.0420995	0.0420995	1.01832	16.9474	0.944282	0.0265222	1.56	0.727273	379.603	1.30746	0.0038592	0.110223	2.32985	2.3386
M030_MAX_iba1-555_rat-W5-r11_EL_tranche2_acq6-1	3.40367	14.1981	20.7613	14.1981	5.1211	6.43137	0.0481666	0.0481666	1.02507	10.1283	0.910139	0.0231222	1.97167	0.967213	269.164	1.28703	0.00324995	0.133341	1.77246	2.78014
M030_MAX_iba1-555_rat-W5-r11_contro_TRANCHE3_acq16.czi - C=0-5	3.66372	19.1537	11.5754	19.1537	3.88955	10.0429	0.0863902	0.0863902	1.03408	11.7619	0.921642	0.0297778	1.715	0.851485	470.479	1.34012	0.0041423	0.247374	1.08654	1.44582
M031_MAX_iba1-555_rat-W5-r11_EL_tranche2_acq6-2	3.55757	16.9505	11.4519	16.9505	4.29356	8.5013	0.0873221	0.0873221	1.03923	8.01824	0.889114	0.0329667	1.07667	1.13043	398.266	1.3613	0.00471695	0.0410512	1.7765	2.67231
M031_MAX_iba1-555_rat-W5-r11_contro_TRANCHE3_acq16.czi - C=0-5	3.69134	19.7726	17.31	19.7726	3.62844	10.863	0.0577702	0.0577702	1.04652	20.0526	0.9525	0.0355556	2.33667	0.603175	568.194	1.36572	0.00498134	0.553399	1.06833	1.16763
M032_MAX_iba1-555_rat-W5-r11_EL_tranche2_acq6-3	3.51546	16.1482	15.9201	16.1482	3.85304	8.03252	0.0628137	0.0628137	0.976402	11.3548	0.91906	0.0297889	1.39833	1.07143	364.734	1.32802	0.00450044	0.155707	3.1429	3.54063
M032_MAX_iba1-555_rat-W5-r11_contro_TRANCHE3_acq16.czi - C=0-5	3.51536	16.1464	13.4234	16.1464	3.88258	8.11047	0.0744969	0.0744969	0.989759	12.7341	0.927189	0.0264	1.54333	0.747253	391.757	1.30641	0.00382006	0.160229	1.37535	1.64193
M033_MAX_iba1-555_rat-W5-r11_EL_tranche2_acq6-4	3.36014	13.5041	7.7999	13.5041	2.91204	7.51333	0.128207	0.128207	0.949435	7.79762	0.886333	0.0246333	0.645	0.701493	220.338	1.30619	0.00411806	0.067161	1.11819	2.30755
M033_MAX_iba1-555_rat-W5-r11_contro_TRANCHE3_acq16.czi - C=0-5	3.62727	18.3666	21.1895	18.3666	3.23154	10.7893	0.0471932	0.0471932	1.05602	28.2316	0.96579	0.0308556	1.33833	0.601307	581.656	1.3419	0.0046563	0.198119	1.46917	1.4696
M034_MAX_iba1-555_rat-W5-r11_EL_tranche2_acq7-1	3.5524	16.8497	15.8317	16.8497	3.96807	8.61719	0.0631645	0.0631645	1.01874	12.3435	0.925057	0.0341	1.715	0.941176	392.792	1.3555	0.00502698	0.162459	1.51264	2.54332
M034_MAX_iba1-555_rat-W5-r11_contro_TRANCHE3_acq17.czi - C=0-2-1	3.62549	18.3291	9.39061	18.3291	3.3952	10.4601	0.106489	0.106489	1.05154	11.6345	0.920852	0.0407111	1.41833	0.664596	600.157	1.39614	0.0064748	0.115643	1.10638	1.35468
M035_MAX_iba1-555_rat-W5-r11_EL_tranche2_acq7-1	3.5818	17.4299	7.02619	17.4299	3.60464	8.78519	0.142325	0.142325	0.956948	8.69591	0.896864	0.0368444	1.81667	0.652893	443.914	1.3634	0.0059472	0.367973	1.10996	1.21954
M035_MAX_iba1-555_rat-W5-r11_contro_TRANCHE3_acq17.czi - C=0-2-1	3.70983	20.1981	9.58387	20.1981	4.02408	11.1658	0.104342	0.104342	1.10895	11.9308	0.922665	0.0415222	2.32667	0.875	560.354	1.40178	0.00623451	0.11909	1.01227	1.03357
M036_MAX_iba1-555_rat-W5-r11_EL_tranche2_acq7-1	3.42497	14.5506	8.48062	14.5506	3.17801	8.01667	0.117916	0.117916	0.98218	8.57709	0.895584	0.0241556	0.94	1.02857	272.954	1.31431	0.00380952	0.107236	1.13347	2.01706
M036_MAX_iba1-555_rat-W5-r11_contro_TRANCHE3_acq18.czi - C=0-1	3.74064	20.9274	30.0058	20.9274	3.61132	11.6442	0.0333269	0.0333269	1.05737	27.2583	0.964612	0.0376778	1.28667	0.78169	588.129	1.38281	0.00537066	0.0383991	1.12672	2.2669
M037_MAX_iba1-555_rat-W5-r11_EL_tranche2_acq7-1	3.50875	16.024	8.06052	16.024	3.53406	9.09317	0.124061	0.124061	1.0668	7.57097	0.883327	0.0295222	0.891667	1.35294	348.196	1.33572	0.00448709	0.15152	1.2961	1.99668
M037_MAX_iba1-555_rat-W5-r11_contro_TRANCHE3_acq19.czi - C=0-2	3.75964	21.3901	39.3048	21.3901	4.73268	9.72222	0.0254422	0.0254422	0.988794	19.224	0.950554	0.0431444	3.675	0.902778	626.779	1.40578	0.00595982	0.143536	1.42959	3.9995
M038_MAX_iba1-555_rat-W5-r11_EL_tranche2_acq8-1	3.73749	20.8515	28.8414	20.8515	5.52741	8.50284	0.0346723	0.0346723	0.958709	13.9315	0.933027	0.0411444	3.93	1.37615	575.427	1.40337	0.00534108	0.116201	3.52757	3.57376
M038_MAX_iba1-555_rat-W5-r11_contro_TRANCHE3_acq19.czi - C=0-2	3.64215	18.6841	30.4967	18.6841	4.29711	9.21324	0.0327904	0.0327904	1.02218	20.0523	0.952499	0.0357889	2.31	0.596774	512.554	1.37103	0.00511386	0.212172	2.90424	3.26241
M039_MAX_iba1-555_rat-W5-r11_EL_tranche2_acq8-1	3.68605	19.6527	24.4343	19.6527	4.49768	9.58838	0.0409261	0.0409261	1.03471	19.1938	0.95048	0.0359	2.11833	1.22917	451.1	1.37213	0.00507571	0.211844	2.24035	2.24149
M039_MAX_iba1-555_rat-W5-r11_contro_TRANCHE3_acq20.czi - C=0-2	3.81152	22.7066	24.9379	22.7066	4.2316	11.4246	0.0400996	0.0400996	1.035	18.7743	0.949429	0.0496556	3.10833	1.09774	735.036	1.44016	0.00689893	0.269672	1.09259	2.5208
M040_MAX_iba1-555_rat-W5-r11_EL_tranche2_acq8-1	3.59246	17.6451	16.8758	17.6451	4.60934	8.22532	0.0592566	0.0592566	1.0008	10.9911	0.916605	0.0299778	2.41667	1.45455	348.985	1.3462	0.00403706	0.311028	1.8571	2.55386
M040_MAX_iba1-555_rat-W5-r11_contro_TRANCHE3_acq20.czi - C=0-2	3.72017	20.44	32.6923	20.44	4.7762	10.5515	0.0305883	0.0305883	1.12817	25.9466	0.96289	0.0392222	2.09667	0.714286	589.063	1.39553	0.00556657	0.15148	1.61797	1.70984
M041_MAX_iba1-555_rat-W5-r11_EL_tranche2_acq9-1	3.67169	19.3303	22.976	19.3303	3.93719	10.0429	0.0435236	0.0435236	1.03089	17.3932	0.945632	0.0421	2.57167	0.857143	535.368	1.39796	0.0062501	0.211194	1.15313	2.6802
M041_MAX_iba1-555_rat-W5-r11_contro_TRANCHE3_acq21.czi - C=0-2	3.71793	20.3873	26.5594	20.3873	5.18174	9.86183	0.0376514	0.0376514	1.10112	21.6333	0.955817	0.0377222	2.75667	1.15574	649.708	1.38969	0.00489678	0.100074	1.53698	1.54964
M042_MAX_iba1-555_rat-W5-r11_EL_tranche2_acq10	3.75506	21.2776	23.4394	21.2776	4.81863	10.782	0.0426633	0.0426633	1.11234	16.9724	0.944359	0.0361444	2.065	1.58511	500.521	1.38666	0.00456825	0.0876654	1.67907	1.73752
M042_MAX_iba1-555_rat-W5-r11_contro_TRANCHE3_acq21.czi - C=0-2	3.76522	21.528	18.5556	21.528	5.02579	11.1614	0.0538922	0.0538922	1.1623	14.2231	0.934311	0.0409333	2.87667	1.03731	677.434	1.40519	0.00551102	0.199075	1.06899	1.47752
M043_MAX_iba1-555_rat-W5-r11_EL_tranche2_acq10	3.60261	17.8525	16.813	17.8525	4.33838	8.8396	0.0594778	0.0594778	1.03133	13.1826	0.929491	0.0345111	2.42	1.13924	426.775	1.36864	0.0048741	0.308706	1.17007	1.73593
M043_MAX_iba1-555_rat-W5-r11_contro_TRANCHE3_acq22.czi - C=0-2	3.79474	22.2723	18.1919	22.2723	4.04316	11.8998	0.0549696	0.0549696	1.07432	17.2692	0.945263	0.0422222	2.71833	0.742331	684.472	1.40527	0.00608326	0.205196	1.19351	1.75167
M044_MAX_iba1-555_rat-W5-r11_EL_TRANCHE3_EL_acq22.czi - C=0-1	3.65987	19.0692	23.3044	19.0692	4.35172	9.19524	0.0429104	0.0429104	1.00591	21.9859	0.956495	0.0362667	2.30167	0.861386	469.738	1.37238	0.00509091	0.141118	1.20728	1.24912
M044_MAX_iba1-555_rat-W5-r11_EL_tranche2_acq10	3.70358	20.0533	18.1407	20.0533	3.84414	10.5679	0.0551247	0.0551247	1.03325	20.1988	0.952828	0.0402778	2.645	0.811024	560.991	1.3943	0.005835	0.290065	1.21729	1.44355
M045_MAX_iba1-555_rat-W5-r11_EL_tranche2_acq11-3	3.57655	17.3249	8.67914	17.3249	3.29863	9.35326	0.115219	0.115219	0.980523	10.6333	0.91404	0.0349	1.395	0.849558	426.837	1.36075	0.00550629	0.0535288	1.10399	1.37878
M045_MAX_iba1-555_rat-W5-r11_contro_TRANCHE3_acq23.czi - C=0-3	3.56781	17.1515	10.9654	17.1515	4.19584	8.14251	0.0911962	0.0911962	0.972447	11.1502	0.917697	0.0341556	1.4	0.834862	454.245	1.36119	0.00501059	0.109711	1.23851	1.28585
M046_MAX_iba1-555_rat-W5-r11_EL_tranche2_acq11-3	3.68671	19.6676	17.8509	19.6676	4.28722	10.0652	0.0560195	0.0560195	1.05964	13.5526	0.931284	0.0368667	1.855	0.765625	518.691	1.37655	0.00534249	0.250376	1.62733	2.67994
M046_MAX_iba1-555_rat-W5-r11_contro_TRANCHE3_acq23.czi - C=0-1	3.64711	18.791	19.1517	18.791	4.53253	9.08705	0.0522148	0.0522148	1.02954	15.4537	0.939224	0.0415	2.475	0.88785	510.332	1.34136	0.00602883	0.166867	1.06052	1.68123
M047_MAX_iba1-555_rat-W5-r11_EL_tranche2_acq11-3	3.4241	14.536	5.81028	14.536	3.11592	8.76577	0.172109	0.172109	1.06448	7.37859	0.880648	0.0356556	0.961667	0.618557	385.682	1.36178	0.00586905	0.141223	1.10041	1.37638
M047_MAX_iba1-555_rat-W5-r11_contro_TRANCHE3_acq23.czi - C=0-1	3.62515	18.3219	16.0738	18.3219	4.03948	10	0.0622131	0.0622131	1.09697	15.383	0.938961	0.0427778	2.47	0.784483	518.44	1.40607	0.00630791	0.125874	1.21305	1.40975
M048_MAX_iba1-555_rat-W5-r11_EL_tranche2_acq12-3	3.64071	18.6531	15.6909	18.6531	3.85877	10.2479	0.0637314	0.0637314	1.07922	15.9251	0.940916	0.0351667	2.08333	0.969072	473.126	1.36472	0.00509806	0.198732	1.15072	1.36637
M048_MAX_iba1-555_rat-W5-r11_contro_TRANCHE3_acq24.czi - C=0-2	3.49042	15.6893	10.3573	15.6893	4.17831	8.61224	0.0965507	0.0965507	1.12205	8.89825	0.898972	0.0313444	0.876667	1.11688	379.48	1.34378	0.00455374	0.0776288	1.60935	1.66573
M049_MAX_iba1-555_rat-W5-r11_EL_tranche2_acq12-3	3.45403	15.0456	18.4973	15.0456	4.39226	7.26954	0.0540619	0.0540619	1.01261	15.6039	0.939773	0.0284111	1.15333	0.771084	326.673	1.32036	0.00428906	0.0279672	1.46373	1.56715
M049_MAX_iba1-555_rat-W5-r11_contro_TRANCHE3_acq24.czi - C=0-2	3.65097	18.8747	20.2887	18.8747	4.30741	9.58173	0.0492885	0.0492885	1.05359	15.507	0.93942	0.0394333	2.18333	1.0566	488.355	1.40003	0.00561799	0.0375346	2.0063	2.30851
M050_MAX_iba1-555_rat-W5-r11_EL_tranche2_acq12-3	3.63076	18.4406	15.4124	18.4406	3.74134	9.98011	0.0648828	0.0648828	1.04683	11.6667	0.921053	0.0320889	2.345	1.20779	370.695	1.35074	0.00452422	0.0558242	1.06352	2.5329
M050_MAX_iba1-555_rat-W5-r11_contro_TRANCHE3_acq25.czi - C=0-2	3.52624	16.3499	19.3034	16.3499	5.77653	6.65228	0.0518044	0.0518044	0.977887	11.0294	0.91687	0.0227222	2.17	1.2	363	1.30403	0.00285903	0.0911754	1.49931	1.82833
M051_MAX_iba1-555_rat-W5-r11_EL_tranche2_acq13-1	3.70167	20.0092	19.3999	20.0092	3.83073	11.1391	0.0515466	0.0515466	1.08959	21.375	0.955307	0.0397778	2.35	0.889908	501.018	1.39432	0.0056958	0.0689101	1.26976	1.29238
M051_MAX_iba1-555_rat-W5-r11_contro_TRANCHE3_acq25.czi - C=0-2	3.62816	18.3855	12.0363	18.3855	3.96805	9.4375	0.0830821	0.0830821	1.02252	8.18021	0.89107	0.0288667	1.34	0.752381	441.521	1.33396	0.0041422	0.0392383	1.27461	2.70128
M052_MAX_iba1-555_rat-W5-r11_EL_tranche2_acq14-1	3.71866	20.4045	25.8102	20.4045	4.36746	10.461	0.0387443	0.0387443	1.07142	21.6839	0.955916	0.0390667	3.41	1.125	496.657	1.39726	0.00519517	0.405101	1.36169	1.44885
M052_MAX_iba1-555_rat-W5-r11_contro_TRANCHE3_acq26.czi - C=0-5	3.62922	18.4079	13.2718	18.4079	4.28871	9.43627	0.0753478	0.0753478	1.0616	14.9679	0.937374	0.0386778	1.325	0.71831	565.174	1.3798	0.00571538	0.0338983	1.19677	1.20449
M053_MAX_iba1-555_rat-W5-r11_EL_tranche2_acq14-1	3.70433	20.0705	19.315	20.0705	4.63367	9.75895	0.0517732	0.0517732	1.04666	19.2638	0.950651	0.0367	2.49667	1	485.74	1.38136	0.00484588	0.0347997	1.00349	1.0113
M053_MAX_iba1-555_rat-W5-r11_contro_TRANCHE3_acq26.czi - C=0-4	3.55789	16.9566	9.77198	16.9566	3.67758	9.22321	0.102333	0.102333	1.0431	10.607	0.913845	0.0295333	0.938333	0.855769	451.301	1.32855	0.00448405	0.0581894	1.48964	1.68902
M054_MAX_iba1-555_rat-W5-r11_EL_tranche2_acq15-1	3.60969	17.9986	7.64437	17.9986	3.68075	9.70765	0.130815	0.130815	1.03477	6.89059	0.873267	0.0344556	1.71167	1.03061	424.366	1.36683	0.00518249	0.109232	1.0084	1.91539
M054_MAX_iba1-555_rat-W5-r11_contro_TRANCHE3_acq26.czi - C=0-3	3.56658	17.1272	12.7721	17.1272	4.86831	7.98728	0.0782958	0.0782958	1.02897	9.48235	0.904602	0.0297	1.76667	0.810811	415.221	1.33162	0.0041812	0.305823	1.76051	1.90396
M055_MAX_iba1-555_rat-W5-r11_EL_tranche2_acq15-2	3.51501	16.1398	14.8798	16.1398	3.24155	9.15989	0.067205	0.067205	1.0218	16.45	0.942693	0.0387778	2.04333	0.842975	447.962	1.37517	0.00615851	0.136472	2.01687	2.11891
M055_MAX_iba1-555_rat-W5-r11_contro_TRANCHE3_acq26.czi - C=0-2	3.73193	20.7185	17.4356	20.7185	4.33611	10.1808	0.0573539	0.0573539	1.02323	13.5292	0.931173	0.0387444	2.94	0.885965	583.963	1.39088	0.00519643	0.0508037	1.64	1.90063
M056_MAX_iba1-555_rat-W5-r11_EL_tranche2_acq16-2	3.50205	15.9008	10.4613	15.9008	3.87292	8.61682	0.0955902	0.0955902	1.06647	8.70968	0.89701	0.0267556	1.33667	0.905405	353.646	1.32747	0.00393972	0.148358	2.22717	2.23658
M056_MAX_iba1-555_rat-W5-r11_contro_TRANCHE3_acq26.czi - C=0-1	3.44471	14.885	10.4405	14.885	4.22917	7.30226	0.0957808	0.0957808	1.00887	10.2676	0.91125	0.0266667	1.22833	0.974684	366.267	1.30746	0.00376533	0.0612372	1.27117	1.28364
M057_MAX_iba1-555_rat-W5-r11_EL_tranche2_acq16-2	3.47342	15.3853	9.50118	15.3853	4.8444	6.79737	0.10525	0.10525	0.972425	7.12681	0.876951	0.0249222	1.57167	0.933333	286.732	1.29649	0.00358378	0.264567	1.00046	1.72139
M057_MAX_iba1-555_rat-W5-r11_contro_TRANCHE3_acq27.czi - C=0-2	3.60278	17.8561	13.874	17.8561	4.19862	8.92519	0.0720772	0.0720772	1.0242	9.72819	0.906788	0.0355222	2.39333	0.762963	612.012	1.38425	0.00527048	0.160153	2.40449	2.60565
M058_MAX_iba1-555_rat-W5-r11_EL_tranche2_acq17-2	3.60037	17.8066	8.91163	17.8066	3.50547	9.73596	0.112213	0.112213	1.0237	10.7773	0.915091	0.0335	1.28667	0.947368	404.947	1.34938	0.00516292	0.106193	1.28692	1.31404
M058_MAX_iba1-555_rat-W5-r11_contro_TRANCHE3_acq27.czi - C=0-1	3.72715	20.6048	16.4889	20.6048	4.42739	9.81818	0.060647	0.060647	1.00262	13.575	0.931389	0.0388667	2.065	0.671141	658.755	1.38139	0.00553315	0.119557	1.64946	2.29171
M059_MAX_iba1-555_rat-W5-r11_EL_tranche2_acq17-2	3.44709	14.9259	20.4563	14.9259	4.62402	6.80645	0.0488846	0.0488846	0.980595	14.0658	0.933624	0.0254444	1.64833	1	302.346	1.29969	0.00357758	0.140181	1.06148	2.05489
M059_MAX_iba1-555_rat-W5-r11_contro_TRANCHE3_acq28.czi - C=0-1	3.71593	20.3404	29.9245	20.3404	5.21807	8.98491	0.0334175	0.0334175	1.00904	23.4015	0.959019	0.0371444	1.97833	0.881356	618.361	1.38894	0.00484375	0.197198	1.04666	1.54614
M060_MAX_iba1-555_rat-W5-r11_PL_acq1-1	3.61619	18.1338	17.9825	18.1338	3.29833	9.60952	0.0556095	0.0556095	0.962411	15.2893	0.93861	0.0438	1.91667	0.736434	486.022	1.40443	0.00696196	0.19245	1.0465	3.16274
M060_MAX_iba1-555_rat-W5-r11_contro_TRANCHE3_acq29.czi - C=0-3	3.49195	15.7171	15.5158	15.7171	3.91433	8.41503	0.0644505	0.0644505	1.05928	15.8189	0.940543	0.0237333	0.896667	1	391.622	1.2953	0.00338124	0.21745	1.21417	1.4676
M061_MAX_iba1-555_rat-W5-r11_PL_acq2-2	3.47016	15.3276	12.8388	15.3276	3.91004	7.77778	0.0778891	0.0778891	1.00339	6.77159	0.871326	0.031	1.43	1.05634	312.07	1.35226	0.00485946	0.171437	2.15079	5.65659
M061_MAX_iba1-555_rat-W5-r11_contro_TRANCHE3_acq29.czi - C=0-1	3.60291	17.8586	12.8744	17.8586	3.1034	10.5478	0.0776737	0.0776737	1.04047	16.8889	0.944099	0.0304111	1.89833	0.631206	542.514	1.33758	0.00465994	0.233322	1.56391	1.56391
M062_MAX_iba1-555_rat-W5-r11_PL_acq2-2	3.60954	17.9955	20.1559	17.9955	3.43091	10.1439	0.0496133	0.0496133	1.0441	23.3368	0.95891	0.0521889	3.765	0.546012	576.226	1.45179	0.00804959	0.450439	1.04903	1.32516
M062_MAX_iba1-555_rat-W5-r11_contro_TRANCHE3_acq29.czi - C=0-2	3.68759	19.6875	17.9797	19.6875	4.36862	9.75521	0.0556184	0.0556184	1.03566	16.784	0.94377	0.0320111	1.74667	0.777778	604.459	1.35483	0.00442839	0.124978	1.35374	1.5078
M063_MAX_iba1-555_rat-W5-r11_PL_acq3-3	3.48118	15.5234	8.32464	15.5234	3.13199	9.36196	0.120125	0.120125	1.06731	9.21927	0.902146	0.0341778	1.18	0.822222	377.865	1.37238	0.00547366	0.114035	1.09194	1.92206
M063_MAX_iba1-555_rat-W5-r11_contro_TRANCHE3_acq30.czi - C=0-3	3.60733	17.9499	12.2594	17.9499	3.6448	9.94379	0.0815703	0.0815703	1.05761	11.5676	0.92043	0.031	1.40667	0.785047	460.96	1.34017	0.00459119	0.197657	1.23975	1.93854
M064_MAX_iba1-555_rat-W5-r11_PL_acq3-3	3.63808	18.5966	42.5557	18.5966	3.65055	9.84941	0.0234986	0.0234986	1.01194	33.1695	0.970734	0.0448	2.73	0.767241	462.881	1.41523	0.00667253	0.10084	1.08961	2.67524
M064_MAX_iba1-555_rat-W5-r11_contro_TRANCHE3_acq30.czi - C=0-2	3.70654	20.1216	31.3286	20.1216	4.24049	9.94444	0.0319197	0.0319197	1.01771	24.4	0.96063	0.0338667	2.72667	0.684615	581.634	1.36458	0.00454323	0.221098	2.20534	2.21057
M065_MAX_iba1-555_rat-W5-r11_PL_acq3-3	3.77147	21.6834	16.8835	21.6834	2.95027	13.7083	0.0592293	0.0592293	1.08589	19.8182	0.951965	0.0458	1.89	0.627551	697.175	1.41604	0.00711188	0.19266	1.90602	1.90648
M065_MAX_iba1-555_rat-W5-r11_contro_TRANCHE3_acq30.czi - C=0-1	3.62485	18.3155	13.8811	18.3155	4.3346	9.31733	0.0720405	0.0720405	1.05913	12.5327	0.926105	0.0321778	2.165	0.693694	474.416	1.35042	0.00449399	0.0831028	1.38726	1.50841
M066_MAX_iba1-555_rat-W5-r11_PL_acq4-1	3.49621	15.7942	13.0385	15.7942	3.99482	7.92056	0.0766959	0.0766959	1.00232	12.2826	0.924714	0.0407333	1.76	0.942857	429.037	1.39227	0.00634848	0.0842152	1.58979	1.93052
M066_MAX_iba1-555_rat-W5-r11_contro_TRANCHE3_acq31.czi - C=0-1	3.76361	21.4882	21.3458	21.4882	4.55013	10.8134	0.0468477	0.0468477	1.07343	13.0279	0.928713	0.0391222	2.91667	1.15596	595.968	1.39647	0.00521729	0.282501	2.71791	2.86454
M067_MAX_iba1-555_rat-W5-r11_PL_acq4-1	3.43796	14.7699	8.48448	14.7699	3.42179	7.92212	0.117862	0.117862	0.99218	8.14341	0.890632	0.0262111	0.813333	0.833333	308.436	1.29493	0.00430055	0.0651083	1.20137	2.42071
M067_MAX_iba1-555_rat-W5-r11_contro_TRANCHE3_acq32.czi - C=0-3	3.40858	14.2787	12.8243	14.2787	4.02478	6.76176	0.0779769	0.0779769	0.950043	7.94581	0.888216	0.0201778	0.856667	0.861111	335.831	1.2704	0.00294845	0.165931	1.83332	4.32104
M068_MAX_iba1-555_rat-W5-r11_PL_acq4-1	3.40255	14.1798	8.99482	14.1798	3.2242	7.37006	0.111175	0.111175	0.933279	9.01487	0.900148	0.0299333	1.07667	0.677778	321.521	1.33831	0.00497891	0.155331	1.12528	2.14097
M068_MAX_iba1-555_rat-W5-r11_contro_TRANCHE3_acq32.czi - C=0-3	3.71322	20.2771	27.3132	20.2771	3.28147	12.2058	0.0366124	0.0366124	1.09042	25.4	0.962121	0.0381333	2.245	0.668831	608.941	1.38591	0.00568161	0.204837	1.84246	2.40253
M069_MAX_iba1-555_rat-W5-r11_PL_acq5-1	3.64404	18.7247	11.8195	18.7247	3.32146	10.6368	0.0846057	0.0846057	1.03528	9.25703	0.902506	0.0567556	2.91167	0.786765	519.806	1.44508	0.00938331	0.131999	3.41146	3.41334
M069_MAX_iba1-555_rat-W5-r11_contro_TRANCHE3_acq32.czi - C=0-3	3.63004	18.4253	12.612	18.4253	3.8005	9.98645	0.0792893	0.0792893	1.05662	9.53974	0.905121	0.0353667	2.18167	0.756757	514.934	1.37006	0.00507105	0.250667	1.91337	2.64823
M070_MAX_iba1-555_rat-W5-r11_PL_acq6-3	3.52415	16.3107	15.9071	16.3107	3.57321	9.40483	0.0628652	0.0628652	1.08995	14.0861	0.933714	0.0409	2.825	0.702899	485.675	1.39294	0.0065726	0.27432	1.34226	2.32669
M070_MAX_iba1-555_rat-W5-r11_contro_TRANCHE3_acq33.czi - C=0-1	3.77453	21.76	21.896	21.76	3.99735	10.7896	0.0456705	0.0456705	0.991363	19.3824	0.950938	0.0462	3.23	0.601064	765.706	1.42011	0.00659807	0.1129	1.13596	1.80294
M071_MAX_iba1-555_rat-W5-r11_PL_acq6-3	3.57818	17.3575	16.2152	17.3575	2.94164	11.1445	0.0616704	0.0616704	1.10121	22.5625	0.95756	0.0418889	1.85	0.455128	486.323	1.39065	0.00704022	0.134302	1.22711	1.60091
M071_MAX_iba1-555_rat-W5-r11_contro_TRANCHE3_acq34.czi - C=0-2	3.64757	18.8009	18.407	18.8009	3.97151	9.72111	0.054327	0.054327	1.03042	17.3152	0.945401	0.0374444	2.68167	0.626667	561.91	1.37716	0.00567955	0.0544735	1.54862	1.86504
M072_MAX_iba1-555_rat-W5-r11_PL_acq6-3	3.47208	15.3615	14.3707	15.3615	3.50798	8.64888	0.0695861	0.0695861	1.05452	11.9959	0.923053	0.0355222	0.86	0.725275	357.414	1.35891	0.00557521	0.0729211	1.0627	2.10637
M072_MAX_iba1-555_rat-W5-r11_contro_TRANCHE3_acq34.czi - C=0-1	3.82653	23.1025	44.3874	23.1025	4.09931	12.0447	0.0225289	0.0225289	1.05558	31.2893	0.96903	0.0434111	2.98833	0.598958	812.603	1.40849	0.00594399	0.136691	1.28874	2.82646
M073_MAX_iba1-555_rat-W5-r11_PL_acq7-2	3.47916	15.4873	13.3261	15.4873	3.24465	9.08876	0.075041	0.075041	1.05709	10.9962	0.91664	0.0347889	2.36333	0.841121	414.732	1.37371	0.00557018	0.279732	3.07583	3.14018
M073_MAX_iba1-555_rat-W5-r11_contro_TRANCHE3_acq35.czi - C=0-1	3.22251	11.5252	13.8836	11.5252	3.01955	6.76834	0.0720276	0.0720276	1.02048	8.53886	0.895166	0.0204556	2.165	0.656716	234.005	1.2596	0.00340225	0.601465	6.6011	7.19879
M074_MAX_iba1-555_rat-W5-r11_PL_acq7-2	3.50002	15.8638	18.4196	15.8638	3.63537	8.20397	0.0542899	0.0542899	0.986033	15.3704	0.938914	0.0294667	1.89167	0.613208	397.6	1.34011	0.00459375	0.447045	2.40065	2.75023
M074_MAX_iba1-555_rat-W5-r11_contro_TRANCHE3_acq36.czi - C=0-1	3.49687	15.8062	30.5756	15.8062	4.21434	7.44709	0.0327058	0.0327058	0.967214	14.775	0.936609	0.0280444	2.52	0.71134	384.183	1.31695	0.00426711	0.427372	1.03877	6.87788
M075_MAX_iba1-555_rat-W5-r11_PL_acq8-1	3.50024	15.8678	17.5367	15.8678	4.98682	6.87229	0.0570232	0.0570232	0.967158	10.2183	0.91086	0.0354	3.125	0.803738	409.407	1.35447	0.00541335	0.376657	1.41062	2.59548
M075_MAX_iba1-555_rat-W5-r11_contro_TRANCHE3_acq37.czi - C=0-2-1	3.50235	15.9063	16.4267	15.9063	4.26123	7.77448	0.0608765	0.0608765	1.00895	14.2042	0.934229	0.0239889	1.32667	0.890411	349.826	1.30883	0.00333394	0.168089	1.59437	1.60825
M076_MAX_iba1-555_rat-W5-r11_PL_acq8-1	3.55563	16.9126	15.53	16.9126	4.52716	7.6347	0.0643915	0.0643915	0.960492	13.2055	0.929605	0.0345667	1.77333	0.683168	395.885	1.35588	0.00512997	0.15213	1.08955	1.26639
M076_MAX_iba1-555_rat-W5-r11_contro_TRANCHE3_acq37.czi - C=0-2-1	3.49586	15.788	7.2645	15.788	4.26578	8.36808	0.137656	0.137656	1.09471	6.86194	0.872805	0.0234111	0.891667	1.25758	315.739	1.28908	0.00340801	0.272972	1.34031	1.5975
M077_MAX_iba1-555_rat-W5-r11_PL_acq9-3	3.50628	15.9785	19.8168	15.9785	3.22177	9.3921	0.0504622	0.0504622	1.05505	22.25	0.956989	0.0330667	1.49	0.508333	401.25	1.34578	0.00519234	0.172933	1.37507	1.47306
M077_MAX_iba1-555_rat-W5-r11_contro_TRANCHE3_acq38.czi - C=0-4	3.31399	12.8054	5.59534	12.8054	3.49867	6.51964	0.17872	0.17872	0.95232	5.56977	0.847788	0.0251111	0.941667	0.712329	257.205	1.28206	0.00414681	0.134691	1.43742	1.70813
M078_MAX_iba1-555_rat-W5-r11_PL_acq9-3	3.29246	12.4918	12.9655	12.4918	3.84383	6.88822	0.0771275	0.0771275	1.0811	11.2166	0.918144	0.0294556	1.15333	0.670588	324.7	1.32504	0.00453608	0.272602	1.23394	1.83171
M079_MAX_iba1-555_rat-W5-r11_PL_acq10	3.61509	18.1109	28.9587	18.1109	4.63381	8.8747	0.0345319	0.0345319	1.05483	22.5793	0.95759	0.0379889	2.38667	0.704918	462.847	1.37552	0.00551934	0.0342043	2.0924	2.09488
M080_MAX_iba1-555_rat-W5-r11_PL_acq10	3.20672	11.3176	6.44438	11.3176	3.16853	6.08904	0.155174	0.155174	0.957683	4.3515	0.813136	0.0218222	0.66	0.769231	188.729	1.27492	0.00372572	0.176236	3.11512	4.1777
M080_MAX_iba1-555_rat-W5-r11_TRANCHE3_ipsi_acq39.czi - C=0-2-2	3.33428	13.108	6.64567	13.108	3.72471	7.24199	0.150474	0.150474	1.06628	5.97455	0.856621	0.0213111	0.751667	0.935484	281.436	1.27079	0.00347943	0.366052	1.08149	2.56718
M081_MAX_iba1-555_rat-W5-r11_L_acq1-3	3.44725	14.9286	7.5722	14.9286	3.31728	8.41463	0.132062	0.132062	1.02661	7.58044	0.883456	0.0302222	0.933333	0.882353	322.264	1.33639	0.00490424	0.214373	1.71005	2.03821
M081_MAX_iba1-555_rat-W5-r11_TRANCHE3_ipsi_acq39.czi - C=0-2-2	3.66772	19.2421	18.4344	19.2421	3.93186	9.62016	0.0542464	0.0542464	0.991352	14.5156	0.935549	0.0331	2.06333	0.896907	477.831	1.3593	0.00486207	0.286779	1.09148	2.43723
M082_MAX_iba1-555_rat-W5-r11_L_acq1-3	3.36866	13.6372	14.9452	13.6372	2.96797	7.77151	0.0669109	0.0669109	0.981768	13.7487	0.932198	0.0326111	1.47167	0.829787	284.329	1.33489	0.00576202	0.147668	2.82715	3.5381
M082_MAX_iba1-555_rat-W5-r11_TRANCHE3_ipsi_acq39.czi - C=0-2-2	3.44523	14.8939	17.8744	14.8939	3.89695	7.74468	0.0559458	0.0559458	1.02649	15.2867	0.9386	0.0258778	1.05333	0.666667	359.102	1.30552	0.00383047	0.207212	2.10691	2.17465
M083_MAX_iba1-555_rat-W5-r11_L_acq1-3	3.38788	13.9423	14.6753	13.9423	3.4567	7.67898	0.0681418	0.0681418	1.024	11.3086	0.918756	0.0332333	2.94333	0.976744	279.249	1.34229	0.00543539	0.621685	1.02224	2.63931
M083_MAX_iba1-555_rat-W5-r11_TRANCHE3_ipsi_acq40.czi - C=0-2	3.67929	19.5002	19.5862	19.5002	4.29108	8.98104	0.0510563	0.0510563	0.954049	13.5217	0.931138	0.0334	2.16333	0.796748	489.068	1.3701	0.00465348	0.253387	1.61806	2.4757
M084_MAX_iba1-555_rat-W5-r11_L_acq2-4	3.35307	13.3946	13.3404	13.3946	3.76375	6.95556	0.07496	0.07496	1.00743	11.875	0.92233	0.0309	1.49333	0.587156	335.021	1.32968	0.0052286	0.264119	1.6361	1.92901
M084_MAX_iba1-555_rat-W5-r11_TRANCHE3_ipsi_acq40.czi - C=0-2	3.50522	15.9589	17.1573	15.9589	3.53671	7.7581	0.0582844	0.0582844	0.91422	9.42759	0.904101	0.0336	1.965	0.844037	419.547	1.31218	0.00545005	0.0979283	1.17626	7.74138
M085_MAX_iba1-555_rat-W5-r11_L_acq2-4	3.61003	18.0058	21.1961	18.0058	4.11806	9.47285	0.0471785	0.0471785	1.06761	16.0754	0.941436	0.0478111	2.72667	0.984496	470.788	1.42396	0.00751956	0.0681757	2.34453	2.41417
M085_MAX_iba1-555_rat-W5-r11_TRANCHE3_ipsi_acq41.czi - C=0-2	3.76466	21.5143	26.8697	21.5143	4.01117	11.3653	0.0372167	0.0372167	1.058	18.4652	0.948626	0.0497444	3.53167	0.629108	773.951	1.4262	0.00780869	0.26101	1.64568	4.45849
M086_MAX_iba1-555_rat-W5-r11_L_acq2-4	3.35392	13.4077	5.23067	13.4077	3.57779	6.84551	0.19118	0.19118	0.965734	6.70968	0.870293	0.0292111	0.588333	0.870968	211.72	1.31012	0.0050676	0.0703196	1.18746	1.20931
M086_MAX_iba1-555_rat-W5-r11_TRANCHE3_ipsi_acq41.czi - C=0-2	3.60955	17.9958	15.1531	17.9958	3.61765	10.388	0.0659931	0.0659931	1.09793	14.0965	0.93376	0.0434444	2.29333	0.713415	596.707	1.40212	0.00675756	0.113083	1.24203	2.09367
M087_MAX_iba1-555_rat-W5-r11_L_acq2-4	3.54946	16.7928	13.4568	16.7928	4.18716	8.32282	0.0743117	0.0743117	1.01416	13.2403	0.929777	0.0368667	2.60833	0.781513	400.104	1.37068	0.00586908	0.428772	1.31467	1.56771
M087_MAX_iba1-555_rat-W5-r11_TRANCHE3_ipsi_acq42.czi - C=0-2	3.39452	14.0494	7.81313	14.0494	3.79051	7.68562	0.12799	0.12799	1.06505	6.47018	0.866134	0.0236556	1.44167	0.655556	321.529	1.29811	0.00385732	0.281745	1.9741	2.01624
M088_MAX_iba1-555_rat-W5-r11_L_acq3-3	3.15524	10.6664	8.77371	10.6664	3.16344	6.21895	0.113977	0.113977	1.03701	8.38148	0.893407	0.0281444	1.05833	1.02	168.223	1.30283	0.00497386	0	2.60731	2.6098
M088_MAX_iba1-555_rat-W5-r11_TRANCHE3_ipsi_acq42.czi - C=0-2	3.54176	16.6448	10.7698	16.6448	3.5162	9.18654	0.0928519	0.0928519	1.03493	10.8899	0.915895	0.0288	1.22	0.70339	417.867	1.31704	0.00455864	0.33564	1.63608	1.65045
M089_MAX_iba1-555_rat-W5-r11_L_acq3-3	3.24554	11.8349	5.613	11.8349	2.87767	7.74839	0.178158	0.178158	1.11063	6.69484	0.870043	0.0364222	0.885	0.75	290.996	1.35229	0.00696429	0.117166	2.02224	2.16996
M089_MAX_iba1-555_rat-W5-r11_TRANCHE3_ipsi_acq43.czi - C=0-5	3.38088	13.8305	7.33748	13.8305	3.36422	7.39889	0.136287	0.136287	0.981232	8.42222	0.893868	0.0329778	1.05833	0.95098	390.623	1.34155	0.00541905	0.0550667	1.12804	1.35088
M090_MAX_iba1-555_rat-W5-r11_L_acq3-3	3.46225	15.1886	8.61476	15.1886	3.69333	8.08649	0.11608	0.11608	1.02318	8.65	0.896373	0.0343111	2.29	0.735849	357.668	1.36285	0.00574981	0.324417	1.01047	1.74541
M090_MAX_iba1-555_rat-W5-r11_TRANCHE3_ipsi_acq43.czi - C=0-5	2.99521	8.87154	3.71399	8.87154	2.74946	5.37788	0.269252	0.269252	1.00516	3.42765	0.774147	0.0153	0.36	0.630435	144.886	1.21101	0.00267003	0.378239	1.06853	2.64395
M091_MAX_iba1-555_rat-W5-r11_L_acq4-5	3.35892	13.4851	7.65739	13.4851	3.24859	8.29966	0.130593	0.130593	1.10932	7.33542	0.88003	0.0295444	0.773333	0.659091	302.976	1.32215	0.0050101	0.202467	1.66771	2.59854
M091_MAX_iba1-555_rat-W5-r11_TRANCHE3_ipsi_acq43.czi - C=0-5	3.19057	11.1091	15.9743	11.1091	2.82759	6.348	0.0626004	0.0626004	0.960873	9.34395	0.903325	0.0180444	1.44333	0.617647	224.592	1.2386	0.00303313	0.588268	8.79569	8.95964
M092_MAX_iba1-555_rat-W5-r11_L_acq4-5	3.24679	11.852	5.99686	11.852	3.55328	6.78277	0.166754	0.166754	1.07878	5.27703	0.840689	0.0206444	0.523333	1.29545	168.482	1.25095	0.00336497	0.228488	1.30726	1.98526
M092_MAX_iba1-555_rat-W5-r11_TRANCHE3_ipsi_acq43.czi - C=0-5	3.53143	16.4479	5.07145	16.4479	3.81518	8.50284	0.197182	0.197182	1.00974	4.96154	0.832258	0.0292778	0.86	0.979381	400.351	1.32523	0.00471065	0.0702395	1.74868	1.84713
M093_MAX_iba1-555_rat-W5-r11_L_acq4-5	3.24453	11.8212	5.95049	11.8212	3.06208	6.63082	0.168053	0.168053	0.981556	7.32906	0.879938	0.0216556	0.561667	0.637931	205.043	1.26741	0.00357557	0.413348	1.02622	1.37966
M094_MAX_iba1-555_rat-W5-r11_L_acq4-5	3.26651	12.1241	6.94404	12.1241	2.66321	8.00352	0.144008	0.144008	1.0773	7.85127	0.887022	0.0310778	1.84	0.480769	289.161	1.31372	0.00590503	0.374366	2.82599	2.84159
M094_MAX_iba1-555_rat-W5-r11_TRANCHE3_ipsi_acq44.czi - C=0-2	3.47296	15.3772	10.0232	15.3772	3.49703	8.11963	0.0997686	0.0997686	0.987436	8.58537	0.895674	0.0262	1.43333	0.942857	365.002	1.30863	0.00415477	0.156835	1.34862	2.80751
M095_MAX_iba1-555_rat-W5-r11_L_acq4-5	3.50518	15.9583	14.6336	15.9583	3.21755	8.68159	0.0683358	0.0683358	0.975834	15.0591	0.93773	0.0422889	2.59333	0.545455	381.588	1.38751	0.0072002	0.311371	2.03392	2.04745
M095_MAX_iba1-555_rat-W5-r11_TRANCHE3_ipsi_acq44.czi - C=0-2	3.53985	16.608	9.83464	16.608	4.78781	8.44969	0.101681	0.101681	1.11324	8.68837	0.896783	0.0231444	1.03667	1.0241	361.715	1.31187	0.00302915	0.079	1.05788	1.21844
M096_MAX_iba1-555_rat-W5-r11_L_acq5-2	3.53002	16.4212	22.1337	16.4212	3.47022	9.07179	0.04518	0.04518	1.02912	21.3879	0.955333	0.0410444	2.82	0.746377	430.1	1.38497	0.00686412	0.347082	1.46996	2.47156
M096_MAX_iba1-555_rat-W5-r11_TRANCHE3_ipsi_acq45.czi - C=0-2	3.41174	14.3306	12.6798	14.3306	4.26033	6.89859	0.0788658	0.0788658	0.99361	6.9589	0.874355	0.0258222	2.14333	0.807692	271.678	1.29569	0.00402294	0.563521	1.56583	3.64979
M097_MAX_iba1-555_rat-W5-r11_L_acq5-2	3.16938	10.8413	7.96478	10.8413	3.23054	6.09894	0.125553	0.125553	1.01113	7.7316	0.885473	0.0224111	0.838333	0.916667	168.143	1.27408	0.00387065	0.488337	1.71047	2.44386
M097_MAX_iba1-555_rat-W5-r11_TRANCHE3_ipsi_acq45.czi - C=0-2	3.44561	14.9005	5.99718	14.9005	3.16955	8.55692	0.166745	0.166745	1.02239	7.05814	0.875902	0.0308	1.38	0.785047	376.415	1.34482	0.00524191	0.0805823	1.53906	1.72232
M098_MAX_iba1-555_rat-W5-r11_L_acq6-4	3.3205	12.9017	14.2106	12.9017	3.5332	7.1478	0.0703702	0.0703702	1.04138	12.2086	0.924291	0.0274444	1.97667	0.5375	263.086	1.30112	0.00449287	0.66643	1.29241	1.92765
M098_MAX_iba1-555_rat-W5-r11_TRANCHE3_ipsi_acq46.czi - C=0-2	3.19777	11.2016	3.96822	11.2016	2.65019	7.48035	0.252002	0.252002	1.08713	4.45748	0.816765	0.0206778	0.358333	0.69697	219.792	1.25765	0.00376414	0.0518337	2.35463	2.60998
M099_MAX_iba1-555_rat-W5-r11_L_acq6-4	3.31229	12.7802	8.62556	12.7802	3.89914	6.64903	0.115934	0.115934	1.02732	5.64115	0.849424	0.0308444	2.305	0.702703	252.095	1.31875	0.00518877	0.604081	1.65884	2.08785
M099_MAX_iba1-555_rat-W5-r11_TRANCHE3_ipsi_acq46.czi - C=0-2	3.33752	13.1569	7.58631	13.1569	4.21492	6.96933	0.131816	0.131816	1.0875	8.53012	0.89507	0.0263667	1.18333	0.792683	276.972	1.29519	0.00436898	0.18361	1.0188	1.175
M100_MAX_iba1-555_rat-W5-r11_L_acq6-4	3.36313	13.5507	10.698	13.5507	3.60263	7.16919	0.0934755	0.0934755	1.0042	10.6823	0.9144	0.0388111	2.27	0.528846	364.509	1.37296	0.00661016	0.455271	2.10106	2.10515
M100_MAX_iba1-555_rat-W5-r11_TRANCHE3_ipsi_acq47.czi - C=0-1	3.67817	19.4751	11.0639	19.4751	3.90138	10.4239	0.090384	0.090384	1.0572	13.5638	0.931337	0.0393222	1.51833	0.886667	580.306	1.39027	0.00595004	0.181825	1.02104	1.03102
M101_MAX_iba1-555_rat-W5-r11_L_acq6-4	3.43008	14.6364	10.2325	14.6364	3.60504	8.26124	0.0977281	0.0977281	1.07168	10.1176	0.910053	0.0357	1.895	0.666667	321.785	1.35132	0.00621608	0.308102	1.57705	1.83247
M101_MAX_iba1-555_rat-W5-r11_TRANCHE3_ipsi_acq48.czi - C=0-2	3.45364	15.0389	10.3692	15.0389	3.84702	7.48024	0.0964392	0.0964392	0.97558	7.35686	0.880338	0.0236778	0.76	0.755556	325.972	1.28048	0.00369446	0.0893167	1.07084	3.53239
M102_MAX_iba1-555_rat-W5-r11_L_acq7-4	3.30346	12.651	4.07882	12.651	2.6013	8.54362	0.245169	0.245169	1.08922	6.80387	0.871859	0.0358111	0.613333	0.613861	288.897	1.34721	0.00675411	0.0948569	1.11902	1.23624
M102_MAX_iba1-555_rat-W5-r11_TRANCHE3_ipsi_acq48.czi - C=0-1	3.60458	17.8931	15.7385	17.8931	4.17955	9.06733	0.0635383	0.0635383	1.036	13.287	0.930006	0.0365111	2.30333	0.811475	482.263	1.37027	0.00537562	0.297074	1.01241	1.55807
M103_MAX_iba1-555_rat-W5-r11_L_acq7-4	3.25461	11.9591	11.6177	11.9591	3.58224	6.27124	0.0860759	0.0860759	0.992502	11.6481	0.920937	0.0227667	1.75333	0.535211	224.59	1.26312	0.0037881	0.64332	1.13594	1.43109
M103_MAX_iba1-555_rat-W5-r11_TRANCHE3_ipsi_acq49.czi - C=0-1	3.55459	16.8924	16.4532	16.8924	4.98916	7.90566	0.0607785	0.0607785	1.04535	10.1581	0.910379	0.0266556	2.55667	1.27381	380	1.32285	0.0035047	0.434064	1.46566	2.03144
M104_MAX_iba1-555_rat-W5-r11_L_acq7-4	3.21669	11.4482	6.10413	11.4482	3.03224	6.31646	0.163823	0.163823	0.960767	4.58661	0.821	0.0268778	0.88	0.646154	231.462	1.2851	0.0049136	0.115016	1.36166	4.39954
M104_MAX_iba1-555_rat-W5-r11_TRANCHE3_ipsi_acq49.czi - C=0-1	3.48313	15.5582	7.08022	15.5582	3.65764	8.7329	0.141239	0.141239	1.07349	6.72222	0.870504	0.0262556	1.11	1.1039	362.066	1.30561	0.004111	0.206742	1.0695	1.85265
M105_MAX_iba1-555_rat-W5-r11_L_acq7-4	3.39406	14.0419	20.3281	14.0419	3.20975	8.51374	0.0491929	0.0491929	1.08625	16.0749	0.941434	0.0430667	3.62333	0.583893	446.198	1.38369	0.00784061	0.703999	4.54164	5.07302
M105_MAX_iba1-555_rat-W5-r11_TRANCHE3_ipsi_acq49.czi - C=0-1	3.47927	15.4892	11.5698	15.4892	3.67046	8.53939	0.086432	0.086432	1.05623	11.1944	0.917995	0.0292667	1.78167	0.720721	410.263	1.32411	0.00462276	0.174276	1.33382	1.99087
M106_MAX_iba1-555_rat-W5-r11_L_acq8	2.98295	8.74725	5.55806	8.74725	2.43704	5.61111	0.179919	0.179919	1.0014	5.72277	0.851252	0.0301778	0.661667	0.666667	162	1.29956	0.00596348	0.192839	1.93769	2.97794
M106_MAX_iba1-555_rat-W5-r11_TRANCHE3_ipsi_acq50.czi - C=0-3	3.166	10.7992	5.8333	10.7992	4.7976	5.23642	0.17143	0.17143	1.06207	4.12011	0.804692	0.0203667	0.831667	0.886364	167.464	1.243	0.00340799	0.140143	1.63764	2.0174
M107_MAX_iba1-555_rat-W5-r11_L_acq9-3	2.92582	8.19038	3.12919	8.19038	2.53761	5.26457	0.319572	0.319572	1.02393	3.24675	0.764526	0.0181667	0.345	0.846154	89.78	1.21297	0.00347467	0.0782062	2.11217	2.13139
M107_MAX_iba1-555_rat-W5-r11_TRANCHE3_ipsi_acq50.czi - C=0-3	3.33959	13.1883	8.25556	13.1883	4.83609	6.36533	0.121131	0.121131	1.0614	5.38284	0.84333	0.0214889	1.25167	0.947368	231.898	1.26303	0.00330703	0.214519	1.18216	1.94608
M108_MAX_iba1-555_rat-W5-r11_L_acq9-3	2.4057	4.50033	3.03042	4.50033	2.25615	3.01899	0.329987	0.329987	1.00763	2.78814	0.736018	0.00993333	0.176667	0.4	39.3936	1.12052	0.00191381	0.211525	1.35215	2.47168
M108_MAX_iba1-555_rat-W5-r11_TRANCHE3_ipsi_acq51.czi - C=0-1	3.55804	16.9595	14.5953	16.9595	3.86825	8.47753	0.068515	0.068515	0.983134	10.1504	0.910317	0.028	2.49	0.988764	374.599	1.35357	0.00419028	0.785786	1.13279	2.43414
M109_MAX_iba1-555_rat-W5-r11_L_acq9-3	2.49935	5.01266	1.77188	5.01266	2.0178	3.64516	0.564373	0.564373	1.03297	1.5402	0.60633	0.0112333	0.258333	1.18182	32.894	1.15091	0.00223411	0.351625	2.88313	3.39667
M109_MAX_iba1-555_rat-W5-r11_TRANCHE3_ipsi_acq51.czi - C=0-1	3.60167	17.8332	10.9027	17.8332	3.59175	10.2848	0.0917203	0.0917203	1.093	13.6022	0.931517	0.0293667	0.86	0.696	481.69	1.33343	0.00447054	0.246043	1.25973	1.47705
M110_MAX_iba1-555_rat-W5-r11_L_acq9-3	3.09162	9.91301	5.79292	9.91301	2.72491	6.27341	0.172625	0.172625	1.04466	6.75427	0.871039	0.0252444	0.615	0.928571	183.125	1.28961	0.00477003	0.265372	1.12477	2.52569
M110_MAX_iba1-555_rat-W5-r11_TRANCHE3_ipsi_acq52.czi - C=0-2-1	3.02202	9.14962	3.296	9.14962	3.56952	5.12683	0.303398	0.303398	1.05865	3.33884	0.769524	0.0116667	0.223333	0.964286	116.645	1.21123	0.00185384	0.16619	1.02074	1.25452
M111_MAX_iba1-555_rat-W5-r11_L_acq10-7	2.56661	5.41624	8.81124	5.41624	2.41035	3.18636	0.113491	0.113491	0.913351	3.41391	0.773443	0.0148111	0.48	0.588235	43.1823	1.17061	0.00274407	0.273896	8.8277	10.9972
M111_MAX_iba1-555_rat-W5-r11_TRANCHE3_ipsi_acq52.czi - C=0-2-1	3.29523	12.5317	8.14733	12.5317	4.25178	5.93811	0.12274	0.12274	0.977064	7.72539	0.885392	0.0187111	0.71	0.72549	197.753	1.24945	0.00299771	0.048737	1.18498	1.60809
M112_MAX_iba1-555_rat-W5-r11_L_acq10-7	2.53138	5.20096	2.795	5.20096	2.45646	3.07216	0.357782	0.357782	0.925798	1.96034	0.662201	0.0116111	0.145	0.818182	39.3425	1.13124	0.00224442	0.154672	1.6723	3.0883
M112_MAX_iba1-555_rat-W5-r11_TRANCHE3_ipsi_acq53.czi - C=0-3	3.63686	18.5705	9.72233	18.5705	3.1924	11.1488	0.102856	0.102856	1.07266	9.21451	0.9021	0.0359778	1.95	0.577922	569.702	1.36547	0.00592541	0.211615	1.14601	2.34255
M113_MAX_iba1-555_rat-W5-r11_L_acq10-7	2.77202	6.86127	4.78741	6.86127	2.72267	3.96133	0.208881	0.208881	0.952651	4.23494	0.808976	0.00965556	0.106667	0.666667	62.7312	1.10264	0.00166134	0.182679	2.31562	2.74772
M113_MAX_iba1-555_rat-W5-r11_TRANCHE3_ipsi_acq53.czi - C=0-3	3.43983	14.8016	6.57728	14.8016	4.02034	7.86728	0.152039	0.152039	1.06573	6.63754	0.869068	0.0262222	1.30333	0.9875	327.84	1.30095	0.00420451	0.321543	1.23196	1.61447
M114_MAX_iba1-555_rat-W5-r11_L_acq10-7	2.29509	3.96224	1.41995	3.96224	1.63328	3.02479	0.704252	0.704252	0.97563	0.979592	0.494845	0.00754444	0.05	0.833333	20.503	1.06804	0.00148485	0.15823	1.69991	5.09224
M114_MAX_iba1-555_rat-W5-r11_TRANCHE3_ipsi_acq53.czi - C=0-3	3.31833	12.8695	14.1465	12.8695	5.33842	5.41316	0.0706888	0.0706888	0.971843	7.72532	0.885391	0.0225889	1.22333	0.87931	211.494	1.26378	0.0034844	0.19837	1.57525	2.1341
M115_MAX_iba1-555_rat-W5-r11_L_acq10-7	2.28304	3.90766	2.41021	3.90766	1.88805	2.6281	0.414901	0.414901	0.924126	1.2618	0.557875	0.00585556	0.158333	1	13.932	1.01394	0.00106209	0.394459	2.63268	6.10001
M115_MAX_iba1-555_rat-W5-r11_TRANCHE3_ipsi_acq54.czi - C=0-1-3	3.4654	15.2439	4.49792	15.2439	3.02766	9.74205	0.222325	0.222325	1.11201	5.12471	0.836727	0.0289222	0.89	0.713043	409.153	1.33482	0.00494461	0.285385	1.63425	1.70279
M116_MAX_iba1-555_rat-W5-r11_L_acq10-7	2.07451	3.07361	1.89457	3.07361	1.89604	2.14706	0.527825	0.527825	0.961876	0.942308	0.485149	0.00448889	0.0166667	0	6.25	1.00831	0.000790418	0.205132	4.35084	4.41352
M116_MAX_iba1-555_rat-W5-r11_TRANCHE3_ipsi_acq54.czi - C=0-1-3	3.17121	10.8643	6.03684	10.8643	3.34164	5.82014	0.16565	0.16565	0.979293	6.08835	0.858924	0.0196111	0.578333	0.847458	227.288	1.23687	0.00331127	0.191904	1.01172	1.90725
M117_MAX_iba1-555_rat-W5-r11_L_acq10-1	2.29941	3.98197	2.55873	3.98197	1.9359	2.85496	0.390819	0.390819	0.99757	2.03896	0.67094	0.0078	0.045	0.625	23.4076	1.08171	0.00148237	0.0533761	5.26889	5.29384
M117_MAX_iba1-555_rat-W5-r11_TRANCHE3_ipsi_acq54.czi - C=0-1-3	3.32715	13.0009	6.16806	13.0009	3.50097	7.10606	0.162126	0.162126	1.02271	7.11599	0.876786	0.0287667	1.22833	0.662921	299.835	1.32365	0.00495285	0.400849	1.08531	1.17213
M118_MAX_iba1-555_rat-W5-r11_L_acq10-7	2.52987	5.19194	8.47117	5.19194	2.33236	3.27211	0.118047	0.118047	0.962488	4.88793	0.830161	0.00758889	0.17	1.07692	39.1552	1.06715	0.00128646	0.223115	1.95993	7.3952
M118_MAX_iba1-555_rat-W5-r11_TRANCHE3_ipsi_acq55.czi - C=0-1-1	3.05951	9.55328	3.53235	9.55328	2.84147	5.9486	0.283097	0.283097	1.04962	4.23333	0.808917	0.0157	0.27	0.64	150.678	1.19414	0.00280771	0.219373	1.2614	1.49712
M119_MAX_iba1-555_rat-W5-r11_L_acq11	1.85559	2.38886	0.884835	2.38886	1.30521	2.04819	1.13015	1.13015	0.979534	0.562016	0.359801	0.00447778	0	1	4.66207	0.990987	0.000861557	0.070447	2.00638	4.08119
M119_MAX_iba1-555_rat-W5-r11_TRANCHE3_ipsi_acq55.czi - C=0-1-1	2.85265	7.52872	4.54955	7.52872	2.66933	4.36123	0.219802	0.219802	0.946432	3.96751	0.798692	0.0152889	0.443333	0.575	109.562	1.22123	0.00285954	0.196259	2.06052	3.10861
M120_MAX_iba1-555_rat-W5-r11_L_acq11	2.05789	3.01538	0.718787	3.01538	1.54845	2.65957	1.39123	1.39123	1.09754	0.632836	0.387569	0.00607778	0.00333333	1	12.7547	1.02211	0.0012173	0.0855138	1.87986	2.12463
M120_MAX_iba1-555_rat-W5-r11_TRANCHE3_ipsi_acq55.czi - C=0-1-1	2.6848	6.20574	1.89847	6.20574	2.59673	4.19718	0.526739	0.526739	1.08988	2.24779	0.692098	0.00815556	0.06	0.769231	60.2854	1.07434	0.0014306	0.0825348	1.20264	1.60573
M121_MAX_iba1-555_rat-W5-r11_L_acq11	2.2483	3.75445	1.69442	3.75445	1.54057	3.03704	0.590171	0.590171	1.00403	1.68079	0.626976	0.0105444	0.0566667	0.444444	23.0067	1.12381	0.00219427	0.0725858	1.14976	3.94945
M121_MAX_iba1-555_rat-W5-r11_TRANCHE3_ipsi_acq55.czi - C=0-3	2.94318	8.35574	4.71718	8.35574	2.4794	5.7619	0.211991	0.211991	1.08581	7.40945	0.881086	0.0118667	0.29	0.651163	132.422	1.15903	0.0019994	0.164783	1.04517	1.27469
M122	2.52942	5.18927	6.80391	5.18927	2.29397	2.94886	0.146974	0.146974	0.860682	2.68519	0.728643	0.00884444	0.641667	1.42857	29.1379	1.11561	0.00156592	0.868922	2.41605	11.2706
M122_MAX_iba1-555_rat-W5-r11_TRANCHE3_ipsi_acq56.czi - C=0-1	2.39658	4.45336	2.5027	4.45336	2.11059	3.14961	0.399568	0.399568	1.02747	1.76724	0.638629	0.00713333	0.0416667	0.777778	26.8902	1.05935	0.00131329	0.167444	1.8326	5.24019
M123_MAX_iba1-555_rat-W5-r11_L_acq12-4	2.70655	6.36313	4.23406	6.36313	2.83657	3.6044	0.23618	0.23618	0.954023	2.89959	0.743563	0.0211444	0.678333	0.407407	67.4777	1.24106	0.00413088	0.276035	1.85365	2.473
M123_MAX_iba1-555_rat-W5-r11_TRANCHE3_ipsi_acq56.czi - C=0-1	3.27839	12.291	7.89351	12.291	4.13481	5.40406	0.126686	0.126686	0.894048	3.4528	0.775422	0.0335444	1.68333	0.75	297.832	1.33642	0.00613003	0.051477	2.24181	6.95459
M124_MAX_iba1-555_rat-W5-r11_L_acq12-4	2.77833	6.91132	6.10848	6.91132	2.74036	3.97297	0.163707	0.163707	0.951609	3.87293	0.794785	0.0196	0.415	0.466667	85.3894	1.23221	0.00373681	0.047619	2.91521	5.1522
M124_MAX_iba1-555_rat-W5-r11_TRANCHE3_ipsi_acq57.czi - C=0-4	2.83545	7.38111	4.62939	7.38111	2.79855	4.22609	0.216011	0.216011	0.957819	3.09496	0.755797	0.0153333	0.498333	0.575758	103.779	1.19477	0.00286877	0.0269191	3.77081	5.64942
M125_MAX_iba1-555_rat-W5-r11_L_acq12-4	2.15095	3.35638	1.46323	3.35638	1.8125	2.44715	0.68342	0.68342	0.981587	1.51969	0.603125	0.00711111	0.0333333	0.6	9.01813	1.10307	0.0013976	0.0559017	1.3432	2.70234
M125_MAX_iba1-555_rat-W5-r11_TRANCHE3_ipsi_acq57.czi - C=0-4	2.78425	6.95854	1.78821	6.95854	2.56391	4.34545	0.559218	0.559218	0.999929	2.16878	0.684421	0.0166889	0.208333	0.545455	121.903	1.20841	0.00334565	0.138952	1.67092	2.13238
M126_MAX_iba1-555_rat-W5-r11_L_acq13-2	2.82218	7.26913	1.88796	7.26913	2.11471	5.24868	0.529671	0.529671	1.05001	2.66832	0.727395	0.0164667	0.108333	0.787879	75.3479	1.18968	0.00320902	0.0519524	1.03665	1.47111
M126_MAX_iba1-555_rat-W5-r11_TRANCHE3_ipsi_acq57.czi - C=0-4	2.95877	8.50706	6.74146	8.50706	2.92935	4.34875	0.148336	0.148336	0.874926	4.24601	0.809379	0.0182444	0.55	0.609756	133.364	1.20753	0.00335274	0.27258	1.81885	3.91038
M127_MAX_iba1-555_rat-W5-r11_L_acq13-2	3.34763	13.311	34.8891	13.311	5.57022	5.57245	0.0286623	0.0286623	0.988036	13.5267	0.931161	0.0484222	6.115	0.871795	240.061	1.3441	0.00828589	1.0324	1.10221	3.54178
M127_MAX_iba1-555_rat-W5-r11_TRANCHE3_ipsi_acq57.czi - C=0-4	3.22712	11.5866	12.3845	11.5866	4.10344	5.49357	0.0807458	0.0807458	0.960447	9.828	0.907647	0.0300778	1.505	0.6625	253.366	1.31037	0.00546036	0.394364	2.56439	2.70322
M128_MAX_iba1-555_rat-W5-r11_L_acq14-3	2.24257	3.72975	2.22394	3.72975	1.46282	3.06164	0.449652	0.449652	0.992819	1.94588	0.660542	0.0127	0.0816667	0.666667	20.0384	1.13435	0.00272235	0.215335	2.85009	5.95365
M128_MAX_iba1-555_rat-W5-r11_TRANCHE3_ipsi_acq58.czi - C=0-1-1	2.411	4.52789	1.31979	4.52789	2.1145	2.98013	0.757695	0.757695	0.95707	1.32544	0.569975	0.00873333	0.0966667	1	33.2232	1.09674	0.00171639	0.0356688	1.92109	2.20797
M129_MAX_iba1-555_rat-W5-r11_L_acq14-3	2.27821	3.88598	5.87903	3.88598	1.99632	2.46923	0.170096	0.170096	0.897793	2.23214	0.690608	0.00603333	0.101667	1.5	9.6	1.02168	0.00106472	0.530818	3.18809	12.0513
M129_MAX_iba1-555_rat-W5-r11_TRANCHE3_ipsi_acq61-3	2.31176	4.03903	1.07974	4.03903	1.84483	2.95652	0.926152	0.926152	0.994218	1.62783	0.619458	0.00902222	0.07	0.7	23.1889	1.09465	0.00180702	0.210559	1.06992	1.26534
M130_MAX_iba1-555_rat-W5-r11_L_acq14-3	1.89546	2.50106	3.59182	2.50106	1.47633	1.61386	0.278411	0.278411	0.784032	1.46715	0.594675	0.00375556	0.0183333	0	4.78109	0.920338	0.000645609	0.384615	4.77839	18.4057
M130_MAX_iba1-555_rat-W5-r11_TRANCHE3_ipsi_acq61-3	2.43842	4.67311	2.68181	4.67311	1.91581	3.13333	0.372882	0.372882	0.928062	1.2757	0.560575	0.0108222	0.148333	0.8	26.3736	1.11016	0.00209951	0.214945	8.49114	8.5221
M131_MAX_iba1-555_rat-W5-r11_L_acq15-6	2.64822	5.94981	3.57242	5.94981	2.54559	3.52564	0.279922	0.279922	0.945429	1.64591	0.622059	0.00755556	0.175	1	26.0638	1.08171	0.00126745	0.306786	3.93947	4.31231
M131_MAX_iba1-555_rat-W5-r11_TRANCHE3_ipsi_acq61-3	2.28313	3.90806	1.20679	3.90806	1.61579	3.11679	0.828648	0.828648	1.01377	1.78592	0.641053	0.0105556	0.05	0.263158	33.11	1.12839	0.00219953	0.0648886	1.18586	1.41533
M132_MAX_iba1-555_rat-W5-r11_L_acq15-6	2.2272	3.66432	9.83651	3.66432	2.45924	2.04975	0.101662	0.101662	0.87722	2.76779	0.734592	0.0111778	0.44	0	14.3559	1.11908	0.00212972	0.780605	24.2628	25.1403
M132_MAX_iba1-555_rat-W5-r11_TRANCHE3_ipsi_acq62-2	3.20358	11.2768	37.6149	11.2768	4.11117	5.54574	0.0265852	0.0265852	0.997141	32.9298	0.970527	0.0214889	1.46833	0.666667	207.446	1.24757	0.003415	0.631801	1.01291	1.45106
M133_MAX_iba1-555_rat-W5-r11_L_acq15-1	2.40987	4.52202	2.08632	4.52202	2.61919	2.62025	0.479313	0.479313	0.937766	1.95133	0.661169	0.00741111	0.0783333	1.66667	21.3356	1.0473	0.00136408	0.193601	2.63333	2.73343
M133_MAX_iba1-555_rat-W5-r11_TRANCHE3_ipsi_acq62-2	3.00113	8.93228	6.67719	8.93228	2.84641	5.67708	0.149764	0.149764	1.07229	6.05357	0.858228	0.0131667	0.473333	0.431373	151.867	1.1727	0.00227366	0.205412	2.85563	3.27807
M134_MAX_iba1-555_rat-W5-r11_L_acq15-1	2.79566	7.05058	3.31716	7.05058	2.51967	4.32	0.301463	0.301463	0.972591	2.26503	0.693724	0.0132778	0.338333	1.11111	59.9867	1.17157	0.00244291	0.362465	1.70635	3.59937
M134_MAX_iba1-555_rat-W5-r11_TRANCHE3_ipsi_acq63-3	2.26191	3.81374	1.47742	3.81374	2.26718	2.62121	0.676857	0.676857	1.03489	0.978852	0.494656	0.00727778	0.151667	2.33333	23.9012	1.11149	0.00140573	0.195366	3.699	3.8258
M135_MAX_iba1-555_rat-W5-r11_L_acq15-1	1.74735	2.10897	0.378356	2.10897	1.1683	2.08642	2.64302	2.64302	1.06932	0.306905	0.234834	0.00567778	0.00333333	0	0.208333	1.03615	0.0011913	0.0442374	1.06403	1.22482
M135_MAX_iba1-555_rat-W5-r11_TRANCHE3_ipsi_acq63-3	2.72052	6.4663	2.6005	6.4663	2.24195	4.54386	0.384542	0.384542	1.05216	3.22426	0.763272	0.0127667	0.15	0.4	99.2303	1.17891	0.00242146	0.121637	1.35642	2.26761
M136_MAX_iba1-555_rat-W5-r11_L_acq15-1	2.64667	5.93922	4.25622	5.93922	2.39639	3.88108	0.23495	0.23495	1.01158	3.57874	0.781599	0.0129222	0.22	0.733333	54.7074	1.19533	0.00244897	0.15791	1.33963	5.30966
M136_MAX_iba1-555_rat-W5-r11_TRANCHE3_ipsi_acq63-3	3.21543	11.4316	27.2214	11.4316	3.76843	5.60807	0.0367358	0.0367358	0.952325	20.9619	0.954467	0.0256222	1.43833	0.478723	288.6	1.28404	0.00436812	0.253339	1.31094	3.73932
M137_MAX_iba1-555_rat-W5-r11_L_acq16-1	1.84681	2.36484	0.517705	2.36484	1.17043	2.37179	1.9316	1.9316	1.08505	0.423977	0.297741	0.00541111	0	0	0.993103	1.03287	0.00111431	0	1.80652	1.8237
M137_MAX_iba1-555_rat-W5-r11_TRANCHE3_ipsi_acq64-1	2.29321	3.95365	5.15742	3.95365	2.46008	2.11667	0.193895	0.193895	0.83971	1.62989	0.619756	0.00821111	0.41	0.4	25.941	1.08831	0.00148482	0.626436	2.4399	12.1155
M138_MAX_iba1-555_rat-W5-r11_L_acq16-1	2.25104	3.76631	2.90518	3.76631	1.84896	2.56944	0.344213	0.344213	0.927655	2.8209	0.738281	0.00853333	0.135	0.636364	33.1023	1.06666	0.00163361	0.505181	1.62709	3.27078
M138_MAX_iba1-555_rat-W5-r11_TRANCHE3_ipsi_acq65-1	2.75633	6.73849	2.41012	6.73849	2.17466	4.77703	0.414917	0.414917	1.04542	3.27317	0.765982	0.00973333	0.095	0.888889	67.614	1.13622	0.00174879	0.12182	1.82311	1.88613
M139_MAX_iba1-555_rat-W5-r11_L_acq16-7	2.26796	3.84039	0.692471	3.84039	1.69019	3.25397	1.4441	1.4441	1.10155	0.836032	0.455347	0.0100778	0.035	0.5	16.6804	1.11448	0.00211101	0.0742474	1.15216	1.29041
M139_MAX_iba1-555_rat-W5-r11_TRANCHE3_ipsi_acq65-1	3.21815	11.4675	19.7722	11.4675	4.79652	5.14072	0.050576	0.050576	0.981791	5.41727	0.84417	0.0198222	2.15333	0.783784	154.266	1.23562	0.00304897	1.01998	5.9272	6.2883
M140_MAX_iba1-555_rat-W5-r11_L_acq16-1	2.90057	7.95571	11.1895	7.95571	3.61944	4.13141	0.0893691	0.0893691	0.987961	4.19652	0.807563	0.0232111	1.51	0.586207	97.7095	1.25037	0.00437026	0.666866	7.94723	8.2149
M140_MAX_iba1-555_rat-W5-r11_TRANCHE3_ipsi_acq66-3	3.36039	13.5079	10.1742	13.5079	4.2748	6.6358	0.0982876	0.0982876	1.01569	7.36515	0.880456	0.0224	1.395	0.733333	278.428	1.27426	0.00344766	0.428406	1.50701	1.95838
M141_MAX_iba1-555_rat-W5-r11_L_acq16-1	3.06206	9.58132	3.3299	9.58132	3.20851	5.15531	0.30031	0.30031	0.963788	3.32173	0.768611	0.0344778	1.695	0.727273	176.06	1.34399	0.00696156	0.348562	1.66398	1.73852
M141_MAX_iba1-555_rat-W5-r11_TRANCHE3_ipsi_acq66-3	3.16896	10.8361	16.2084	10.8361	3.18054	5.27492	0.0616964	0.0616964	0.868146	6.27465	0.862536	0.0229556	0.865	0.689655	198	1.28046	0.00405632	0.140873	7.49328	17.5731
M142_MAX_iba1-555_rat-W5-r11_L_acq16-1	3.03551	9.29291	5.8302	9.29291	2.76642	5.96786	0.171521	0.171521	1.06813	5.27561	0.840653	0.0285889	0.738333	0.447761	177.716	1.31325	0.00564057	0.374051	3.61639	3.71576
M142_MAX_iba1-555_rat-W5-r11_TRANCHE3_ipsi_acq66-3	3.11184	10.1464	1.92107	10.1464	2.88798	5.55401	0.520543	0.520543	0.930232	2.43958	0.709267	0.0218222	0.395	0.73913	174.479	1.24171	0.00422741	0.131574	1.05706	1.30503
M143_MAX_iba1-555_rat-W5-r11_L_acq16-1	3.1012	10.0229	7.25263	10.0229	3.43495	5.37389	0.137881	0.137881	0.993699	3.36639	0.770978	0.0288667	0.943333	0.840909	141.832	1.30891	0.00531883	0.119339	5.37358	5.54918
M143_MAX_iba1-555_rat-W5-r11_TRANCHE3_ipsi_acq67-1	3.02551	9.18645	4.05656	9.18645	2.7767	5.74783	0.246514	0.246514	1.04261	4.33333	0.8125	0.0183111	0.52	0.551724	174.948	1.21943	0.00333123	0.177633	1.28093	1.9089
M144_MAX_iba1-555_rat-W5-r11_L_acq17-1	2.99624	8.88212	11.5667	8.88212	3.01705	5.09507	0.086455	0.086455	0.996379	4.28	0.810606	0.0234667	2.265	0.571429	95.809	1.27531	0.00426896	0.827155	10.9718	10.9767
M144_MAX_iba1-555_rat-W5-r11_TRANCHE3_ipsi_acq67-3	3.2429	11.7989	10.4971	11.7989	3.73013	6.3295	0.095264	0.095264	1.03607	12.2203	0.924359	0.0173333	0.498333	0.877193	199.979	1.24074	0.00265918	0.162117	1.18378	1.21178
M145_MAX_iba1-555_rat-W5-r11_L_acq17-1	2.70927	6.38308	19.3702	6.38308	3.50723	2.48763	0.0516256	0.0516256	0.729858	3.86432	0.794421	0.0107556	0.473333	5.5	53.0611	1.15766	0.00164739	0.523221	3.16476	18.1263
M145_MAX_iba1-555_rat-W5-r11_TRANCHE3_ipsi_acq68-3	3.06077	9.56706	5.71699	9.56706	2.34618	5.46091	0.174917	0.174917	0.874313	3.72531	0.788374	0.0170111	0.336667	0.584615	214.649	1.21777	0.00314477	0.130316	1.00796	8.57447
M146_MAX_iba1-555_rat-W5-r11_L_acq17-1	2.86949	7.67606	8.51672	7.67606	3.75447	3.14118	0.117416	0.117416	0.792918	2.07801	0.675114	0.0267444	0.825	1.29412	86.0775	1.30161	0.00526901	0.387808	1.39356	15.4912
M146_MAX_iba1-555_rat-W5-r11_TRANCHE3_ipsi_acq68-1	3.26742	12.1368	9.22183	12.1368	3.31907	7.3166	0.108438	0.108438	1.09828	9.37433	0.903608	0.0215556	1.22667	0.461538	246.985	1.25284	0.00361885	0.592043	1.80621	1.8616
M147_MAX_iba1-555_rat-W5-r11_L_acq18-1	2.20187	3.55903	7.16252	3.55903	1.96617	2.88119	0.139616	0.139616	1.13514	6.09333	0.859023	0.00591111	0.166667	1	10.4179	1.06759	0.00104613	0.715037	3.11309	4.3378
M147_MAX_iba1-555_rat-W5-r11_TRANCHE3_ipsi_acq68-2	2.84378	7.45224	11.195	7.45224	2.42857	4.06276	0.0893259	0.0893259	0.849591	6.0733	0.858623	0.0150111	0.771667	0.385965	166.897	1.17153	0.0027421	0.310202	6.65315	15.7132
M148_MAX_iba1-555_rat-W5-r11_L_acq18-1	1.74566	2.10487	0.461371	2.10487	1.10225	2.26027	2.16745	2.16745	1.1274	0.365922	0.267894	0.00543333	0	0	0.0687023	1.03301	0.00113323	0.0452216	1.64543	1.69081
M148_MAX_iba1-555_rat-W5-r11_TRANCHE3_ipsi_acq69-3	2.42028	4.57652	5.62285	4.57652	2.07383	3.36275	0.177846	0.177846	1.05814	6.84211	0.872483	0.00496667	0.121667	1.75	31.5923	0.995593	0.000838359	0.105762	3.25707	3.27102
M149_MAX_iba1-555_rat-W5-r11_L_acq18-1	1.87041	2.42998	0.724154	2.42998	1.30167	2.24468	1.38092	1.38092	1.05391	0.886792	0.47	0.00666667	0	0	7.18085	1.07631	0.00137334	0.0408248	1.51119	1.58143
M149_MAX_iba1-555_rat-W5-r11_TRANCHE3_ipsi_acq69-3	3.07171	9.68836	4.72193	9.68836	3.05383	5.83077	0.211778	0.211778	1.05172	4.95652	0.832117	0.0121778	0.516667	0.909091	138.965	1.1582	0.00202126	0.333637	1.6125	1.61688
M150_MAX_iba1-555_rat-W5-r11_L_acq18-1	2.3556	4.24812	16.6094	4.24812	1.84537	2.31148	0.060207	0.060207	0.739153	4.75912	0.826362	0.00876667	0.41	1	17.8896	1.06483	0.00156014	0.304175	35.4762	57.4024
M150_MAX_iba1-555_rat-W5-r11_TRANCHE3_ipsi_acq69-2	2.54972	5.31193	3.01977	5.31193	2.01891	3.79739	0.331151	0.331151	1.01576	4.50289	0.818277	0.0105778	0.155	0.26087	58.2401	1.11663	0.00200882	0.27501	1.22282	1.52666
M151_MAX_iba1-555_rat-W5-r11_L_acq18-1	2.60238	5.64399	6.02599	5.64399	1.92505	4.39512	0.165948	0.165948	1.08045	9.0396	0.900394	0.0225333	0.661667	0.365854	86.3138	1.23879	0.00485398	0.378151	2.21665	2.57979
M151_MAX_iba1-555_rat-W5-r11_TRANCHE3_ipsi_acq70-1	3.23644	11.7116	41.8643	11.7116	5.04741	4.84247	0.0238867	0.0238867	0.928935	13.321	0.930172	0.0128889	1.62833	0.837209	172.16	1.17779	0.00181986	0.762256	2.80216	5.17137
M152_MAX_iba1-555_rat-W5-r11_L_acq18-1	2.54954	5.31085	14.3375	5.31085	2.87121	2.736	0.0697473	0.0697473	0.87294	4.3012	0.811364	0.0146667	0.721667	0.466667	43.563	1.19817	0.00272704	0.909962	1.01637	16.8075
M152_MAX_iba1-555_rat-W5-r11_TRANCHE3_ipsi_acq70-1	2.24977	3.76078	4.91485	3.76078	1.81588	2.53548	0.203465	0.203465	0.908504	2.95	0.746835	0.00965556	0.126667	0.285714	22.188	1.06725	0.00188442	0.0339227	12.0695	12.4465
M153_MAX_iba1-555_rat-W5-r11_L_acq19-1	2.08634	3.11575	1.0413	3.11575	1.36034	2.66	0.960339	0.960339	0.995734	0.864952	0.463793	0.00644444	0.03	0.4	7.86617	1.07378	0.00128951	0.207614	1.36251	3.16328
M153_MAX_iba1-555_rat-W5-r11_TRANCHE3_ipsi_acq70-1	1.76939	2.16317	0.646499	2.16317	1.18728	2.08065	1.54679	1.54679	1.04805	0.521505	0.342756	0.00314444	0	0	1.48454	0.935507	0.000581715	0.0594438	1.2427	2.54886
M154_MAX_iba1-555_rat-W5-r11_L_acq19-1	2.51191	5.08568	6.23346	5.08568	2.51136	2.69547	0.160425	0.160425	0.839925	3.125	0.757576	0.0146667	0.325	1.33333	21.025	1.16997	0.00285577	0.249241	6.13432	8.5593
M154_MAX_iba1-555_rat-W5-r11_TRANCHE3_ipsi_acq71-4	2.36613	4.29994	5.68141	4.29994	2.97872	2.1658	0.176013	0.176013	0.869304	2.21368	0.68883	0.00835556	0.415	0.833333	22.1023	1.04125	0.00144677	0.593628	2.61428	4.43303
M155_MAX_iba1-555_rat-W5-r11_L_acq19-1	2.01831	2.88106	3.21774	2.88106	1.40293	2.04027	0.310777	0.310777	0.838792	1.59064	0.613995	0.00984444	0.08	0.2	9.79596	1.10766	0.0020172	0.212478	9.35045	17.1747
M155_MAX_iba1-555_rat-W5-r11_TRANCHE3_ipsi_acq71-4	2.71527	6.42735	8.8885	6.42735	3.14916	3.28505	0.112505	0.112505	0.906999	2.53903	0.717437	0.0105778	0.535	0.916667	51.1991	1.12166	0.00171473	0.791233	4.46553	7.57897
M156_MAX_iba1-555_rat-W5-r11_L_acq19-1	2.80421	7.12036	3.32569	7.12036	3.17514	3.79182	0.300689	0.300689	0.948914	1.84	0.647887	0.0181444	0.613333	0.857143	66.8771	1.19922	0.0034764	0.297983	2.7441	2.85798
M156_MAX_iba1-555_rat-W5-r11_TRANCHE3_ipsi_acq71-4	2.91893	8.12572	9.98137	8.12572	3.69656	4.08835	0.100187	0.100187	0.967354	6.01685	0.857486	0.0138778	0.425	0.575758	115.034	1.15843	0.00241211	0.233331	2.86143	3.65212
M157_MAX_iba1-555_rat-W5-r11_L_acq19-5	2.87627	7.73628	44.974	7.73628	5.24668	3.15193	0.0222351	0.0222351	0.933227	7.7868	0.886193	0.0192333	1.75	0.666667	69.2803	1.21827	0.00330864	0.999711	10.0294	11.2196
M157_MAX_iba1-555_rat-W5-r11_TRANCHE3_ipsi_acq71-4	3.09432	9.94386	5.97032	9.94386	3.0041	5.94275	0.167495	0.167495	1.03583	6.86694	0.872886	0.0216778	0.656667	0.605634	209.985	1.24879	0.00389002	0.324152	1.30689	1.64971
M158_MAX_iba1-555_rat-W5-r11_L_acq20-2	2.35953	4.26739	5.81106	4.26739	1.85106	2.85714	0.172086	0.172086	0.91092	2.61538	0.723404	0.0094	0.191667	1.33333	19.7712	1.0865	0.00173618	0.678094	12.3778	13.7068
M158_MAX_iba1-555_rat-W5-r11_TRANCHE3_ipsi_acq72-2	3.3001	12.6022	5.28966	12.6022	2.91741	8.12261	0.189048	0.189048	1.1009	5.10298	0.836146	0.0250222	0.913333	0.785714	244.123	1.29737	0.00420262	0.368015	1.00924	1.92639
M159_MAX_iba1-555_rat-W5-r11_L_acq20-2	2.0859	3.11418	0.796012	3.11418	1.18229	3.07143	1.25626	1.25626	1.0724	0.784926	0.439753	0.0107889	0.025	0.125	17.726	1.11675	0.00240605	0.0717588	2.38971	2.65058
M159_MAX_iba1-555_rat-W5-r11_TRANCHE3_ipsi_acq72-2	3.00633	8.98588	5.91233	8.98588	3.36494	5.30943	0.169138	0.169138	1.08387	7.26695	0.879036	0.0216778	0.46	0.349206	166.272	1.25511	0.00394619	0.295186	1.37264	1.49015
M159_MAX_iba1-555_rat-W5-r11_TRANCHE3_ipsi_acq72	3.00633	8.98588	5.91233	8.98588	3.36494	5.30943	0.169138	0.169138	1.08387	7.26695	0.879036	0.0216778	0.46	0.349206	166.272	1.25511	0.00394619	0.295186	1.37264	1.49015
M160_MAX_iba1-555_rat-W5-r11_TRANCHE4_ipsi_acq1.czi - C=0-1	2.51068	5.07848	2.11138	5.07848	1.96626	3.99291	0.473624	0.473624	1.10249	2.41958	0.707566	0.0108667	0.06	0.47619	51.0751	1.11553	0.00211857	0.159882	1.37721	2.03154
M161_MAX_iba1-555_rat-W5-r11_TRANCHE4_ipsi_acq2.czi - C=0-1	1.99959	2.81961	1.38243	2.81961	1.36863	2.39474	0.723366	0.723366	0.993603	0.879093	0.467828	0.00828889	0.0283333	1.5	6.32951	1.07401	0.001723	0.155334	5.87432	5.8878
M162_MAX_iba1-555_rat-W5-r11_TRANCHE4_ipsi_acq2.czi - C=0-1	1.74782	2.11011	0.427235	2.11011	1.1844	1.99153	2.34063	2.34063	1.02714	0.302111	0.232016	0.0109667	0.00333333	1	2.31004	1.16706	0.00253041	0.0318304	1.51505	1.55917
M163_MAX_iba1-555_rat-W5-r11_TRANCHE4_ipsi_acq2.czi - C=0-1	2.0735	3.07006	0.989042	3.07006	1.31722	2.65772	1.01108	1.01108	0.993555	0.506257	0.336103	0.0147111	0.035	0.2	15.1101	1.13392	0.0033607	0.122905	5.03143	5.32964
M164_MAX_iba1-555_rat-W5-r11_TRANCHE4_ipsi_acq2.czi - C=0-1	1.72124	2.04652	0.441394	2.04652	1.0598	2.25316	2.26555	2.26555	1.13341	0.294624	0.227575	0.00668889	0	0	0	1.07272	0.00145187	0.040757	1.38038	1.77003
M165_MAX_iba1-555_rat-W5-r11_TRANCHE4_ipsi_acq3.czi - C=0-1	1.86101	2.40382	0.551088	2.40382	1.3191	2.1519	1.81459	1.81459	1.02815	0.611336	0.379397	0.00442222	0.00333333	1	3.2053	0.998441	0.000863804	0.0708881	1.40134	1.40135
M166_MAX_iba1-555_rat-W5-r11_TRANCHE4_ipsi_acq4.czi - C=0-2	2.2646	3.82556	3.87359	3.82556	1.42414	2.75862	0.258159	0.258159	0.860543	2.67089	0.727586	0.00966667	0.118333	0.176471	32.7583	1.11338	0.00195948	0.0479463	3.1849	13.5559
M167_MAX_iba1-555_rat-W5-r11_TRANCHE4_ipsi_acq4.czi - C=0-2	2.94121	8.33679	5.87884	8.33679	2.45693	5.08118	0.170102	0.170102	0.955349	6.78136	0.871488	0.0241222	0.52	0.333333	185.861	1.26265	0.00473034	0.109435	1.2252	2.02244
M168_MAX_iba1-555_rat-W5-r11_TRANCHE4_ipsi_acq5.czi - C=0-2	2.50109	5.02275	2.50896	5.02275	1.86637	3.47097	0.398572	0.398572	0.944078	1.79205	0.64184	0.0101444	0.0666667	0.5	55.9061	1.10681	0.00196442	0.240936	3.08987	6.43737
M169_MAX_iba1-555_rat-W5-r11_TRANCHE4_ipsi_acq5.czi - C=0-2	2.78248	6.94444	1.20647	6.94444	1.80305	5.5	0.828865	0.828865	1.06348	2.23457	0.69084	0.0145556	0.0416667	0.485714	103.465	1.18059	0.00297357	0.0276289	1.21487	1.22104
M170_MAX_iba1-555_rat-W5-r11_TRANCHE4_ipsi_acq6.czi - C=0-3	1.80135	2.24424	0.617959	2.24424	1.15152	2.28	1.61823	1.61823	1.09018	0.387387	0.279221	0.00513333	0	0	0.937984	1.01512	0.00104416	0.104031	2.09785	2.85119
M171_MAX_iba1-555_rat-W5-r11_TRANCHE4_ipsi_acq6.czi - C=0-3	2.78617	6.97398	6.71495	6.97398	4.61523	2.75	0.148921	0.148921	0.847127	1.45209	0.592184	0.0110889	0.446667	1	77.489	1.12112	0.00183041	0.184576	6.72397	8.05609
M172_MAX_iba1-555_rat-W5-r11_TRANCHE4_ipsi_acq6.czi - C=0-3	2.45137	4.74328	4.48842	4.74328	2.44718	2.37634	0.222795	0.222795	0.783725	1.54044	0.606368	0.00767778	0.175	1	24.3461	1.05441	0.0013331	0.152167	4.80776	11.2524
M173_MAX_iba1-555_rat-W5-r11_TRANCHE4_ipsi_acq7.czi - C=0-1	2.73492	6.57438	2.65177	6.57438	2.49923	3.74554	0.377106	0.377106	0.900663	1.75745	0.637346	0.0144	0.09	0.875	74.46	1.17745	0.00275171	0.177865	2.74572	3.33912
M174_MAX_iba1-555_rat-W5-r11_TRANCHE4_ipsi_acq7.czi - C=0-1	2.39158	4.42778	2.01442	4.42778	2.48993	2.70787	0.496422	0.496422	0.965015	1.02361	0.505832	0.0104778	0.19	0.8	31.717	1.12851	0.0020133	0.248004	2.33938	3.0341
M175_MAX_iba1-555_rat-W5-r11_TRANCHE4_ipsi_acq8.czi - C=0-3	2.22263	3.6451	1.67052	3.6451	1.52843	2.90977	0.598616	0.598616	0.986897	1.49167	0.598662	0.00996667	0.128333	0.833333	33.9385	1.11298	0.00209822	0.307832	1.667	4.34862
M176_MAX_iba1-555_rat-W5-r11_TRANCHE4_ipsi_acq8.czi - C=0-3	2.15721	3.38065	0.588025	3.38065	1.42216	2.88288	1.70061	1.70061	1.01695	0.739024	0.424965	0.00792222	0.01	0.833333	19.0627	1.12182	0.00164359	0.112351	1.27153	1.28875
M177_MAX_iba1-555_rat-W5-r11_TRANCHE4_ipsi_acq8.czi - C=0-3	2.2103	3.59372	1.25842	3.59372	1.81818	2.29936	0.79465	0.79465	0.862744	0.712154	0.41594	0.00892222	0.0416667	0	12.2635	1.09715	0.00181604	0.0499065	1.54655	4.13464
M179_MAX_iba1-555_rat-W5-r11_TRANCHE4_ipsi_acq9.czi - C=0-1	2.97512	8.66868	3.1164	8.66868	2.35243	5.63784	0.320884	0.320884	0.997511	4.16592	0.806424	0.0128	0.133333	0.470588	144.983	1.16994	0.00223357	0.0416667	1.46128	1.51634
M180_MAX_iba1-555_rat-W5-r11_TRANCHE4_ipsi_acq10.czi - C=0-3	2.5998	5.62725	9.20695	5.62725	4.21223	2.62646	0.108614	0.108614	0.957923	4.84184	0.828821	0.0127222	0.361667	0.666667	37.6407	1.13802	0.00222329	0.177316	1.1655	1.95187
M181_MAX_iba1-555_rat-W5-r11_TRANCHE4_ipsi_acq10.czi - C=0-3	2.61903	5.75321	6.81438	5.75321	2.57264	3.58919	0.146749	0.146749	1.00064	2.33333	0.7	0.0117778	0.546667	0.473684	59.434	1.12358	0.00221058	0.480762	11.7898	13.8313
M182_MAX_iba1-555_rat-W5-r11_TRANCHE4_ipsi_acq10.czi - C=0-3	2.79583	7.05199	3.48575	7.05199	2.33355	4.70476	0.286882	0.286882	1.01914	3.38764	0.772087	0.0173556	0.333333	0.375	119.105	1.21245	0.00337594	0.282888	1.08807	2.66834
M183_MAX_iba1-555_rat-W5-r11_TRANCHE4_ipsi_acq11.czi - C=0-3	2.69446	6.27514	5.05604	6.27514	3.66338	3.27778	0.197783	0.197783	0.999762	2.08841	0.676209	0.0112556	0.63	0.4	49.4248	1.11801	0.00200222	0.636191	3.88285	4.82096
M184_MAX_iba1-555_rat-W5-r11_TRANCHE4_ipsi_acq11.czi - C=0-3	3.30483	12.671	10.3131	12.671	2.99425	7.92278	0.0969642	0.0969642	1.08196	9.08213	0.900815	0.0231889	1.4	0.576923	204.468	1.27616	0.0037154	0.61952	1.88885	2.15085
M185_MAX_iba1-555_rat-W5-r11_TRANCHE4_ipsi_acq12.czi - C=0-2	3.22285	11.5298	34.0677	11.5298	3.02655	6.42808	0.0293533	0.0293533	0.969917	23.8118	0.959697	0.0234333	1.22333	0.435897	242.787	1.27419	0.00382084	0.413155	1.30723	4.12067
M186_MAX_iba1-555_rat-W5-r11_TRANCHE4_ipsi_acq12.czi - C=0-2	3.22149	11.5118	17.7401	11.5118	3.31193	6.00702	0.0563694	0.0563694	0.949636	10.5789	0.913636	0.0195556	1.525	0.685714	243.704	1.23602	0.00321985	0.650612	2.72405	4.19619
M187_MAX_iba1-555_rat-W5-r11_TRANCHE4_ipsi_acq12.czi - C=0-2	2.8453	7.46524	6.4397	7.46524	2.94926	4.13504	0.155287	0.155287	0.951245	3.15646	0.759411	0.0203667	0.786667	0.4	172.486	1.24683	0.00392594	0.453513	1.51552	4.99744
M188_MAX_iba1-555_rat-W5-r11_TRANCHE4_ipsi_acq13.czi - C=0-1	3.04896	9.43789	4.54902	9.43789	2.72056	5.7381	0.219828	0.219828	1.00282	4.54303	0.819593	0.0207556	0.565	0.666667	232.016	1.24014	0.0037827	0.258682	1.36103	2.43017
M189_MAX_iba1-555_rat-W5-r11_TRANCHE4_ipsi_acq14.czi - C=0-2	2.09879	3.16073	1.35646	3.16073	1.7017	2.47826	0.737215	0.737215	1.02282	1.09385	0.522411	0.00718889	0.0533333	1	9.95266	1.05387	0.00141146	0.19657	2.5736	2.77012
M190_MAX_iba1-555_rat-W5-r11_TRANCHE4_ipsi_acq14.czi - C=0-2	1.93724	2.6243	1.36487	2.6243	1.35498	2.46018	0.73267	0.73267	1.09124	2.18929	0.68645	0.00992222	0.0233333	0.363636	24.6803	1.10869	0.00215367	0.195125	1.05682	2.19763
iba1-555_rat-W5-r11_ipsi_TRANCHEipsi_EL_acq1	2.9487	8.40906	3.66409	8.40906	2.47015	5.80952	0.272919	0.272919	1.08581	5.57669	0.847948	0.0119111	0.248333	0.682927	133.228	1.15933	0.00201645	0.178091	1.04396	1.27185
