# Supplementary material for: MorphoCellSorter is an Andrews plot-based sorting approach to rank microglia according to their morphological features
Source: eLife. 2025 May 19;13:RP101630. doi: 10.7554/eLife.101630 (PMC12088675; doi:10.7554/eLife.101630)
Supplement: Figure 4—source data 2. [file elife-101630-fig4-data2.xlsx]

## Sheet: Parameters
microglia	PerimeterAreaRatio	ModifiedCircularity	RoundnessFactor	RamificationIndex	Solidity	Convexity	ConvexHullRadiiRatio	SpanRatio	ConvexHullCircularity	ProcessesSomaAreasRatio	ProcessesCellAreasRatio	Density	BranchingIndex	EndpointsBranchpointsRatio	SkeletonProcessesRatio	FractalDimension	LacunaritySlope	PolarizationIndex	Linearity	Inertia
Phox2bKO_NT E3 cre mutant NTx40- (1)	2.13336	0.304036	0.155434	3.28908	0.49949	2.01657	4.27925	3.22367	0.867513	2.4386	0.709184	0.0108889	0.125	0	2.41871	1.09412	0.00219908	0.788954	11.6231	16.6307
Phox2bKO_NT E3 cre mutant NTx40- (10)	1.97595	0.364444	0.981124	2.74391	0.702439	2.23077	3.10057	2.14852	0.970021	0.607143	0.377778	0.008	0.02	2	6.79779	1.11714	0.00167257	0.117851	3.47254	4.08936
Phox2bKO_NT E3 cre mutant NTx40- (100)	2.79125	0.142554	0.191257	7.01489	0.193677	2.944	1.95021	1.60921	0.953626	1.49573	0.599315	0.00973333	0.316667	12	34.7143	1.12904	0.00155781	0.32053	2.02606	3.91745
Phox2bKO_NT E3 cre mutant NTx40- (101)	2.59347	0.179008	0.152734	5.58634	0.302126	2.84783	2.51384	2.02382	0.927452	2.89324	0.743144	0.0121556	0.208333	4.5	19.2189	1.1331	0.00220584	0.183904	3.8278	6.45277
Phox2bKO_NT E3 cre mutant NTx40- (102)	2.5413	0.190089	0.0711888	5.26071	0.28131	2.3554	3.39779	2.8064	0.844166	3.72662	0.788432	0.0146	0.416667	1.6	30.583	1.15768	0.00266608	1.13643	1.59662	17.5317
Phox2bKO_NT E3 cre mutant NTx40- (103)	2.50916	0.197253	0.165822	5.06963	0.292197	2.86275	2.02614	1.57925	1.04465	3.20717	0.762311	0.0117333	0.203333	4	18.7938	1.10829	0.00213972	0.370554	3.10872	4.08902
Phox2bKO_NT E3 cre mutant NTx40- (104)	2.42234	0.217989	0.174242	4.58738	0.368389	2.80282	2.72426	2.01041	1.00665	3.40441	0.772955	0.00665556	0.285	2.5	12.149	1.02599	0.00114862	0.51196	4.80243	4.9615
Phox2bKO_NT E3 cre mutant NTx40- (105)	2.71962	0.154808	0.0638435	6.45963	0.169298	2.62381	2.28117	1.94568	0.987185	3.78512	0.791019	0.00643333	0.31	12	20.5437	1.03095	0.000926816	0.583302	4.95748	5.05467
Phox2bKO_NT E3 cre mutant NTx40- (106)	2.50422	0.198379	0.203875	5.04087	0.269051	2.31507	3.19587	1.90852	0.885404	1.63934	0.621118	0.00894444	0.141667	4	20.808	1.09889	0.00157832	0.290641	4.19853	4.31536
Phox2bKO_NT E3 cre mutant NTx40- (107)	2.48109	0.203733	0.137444	4.90838	0.269877	2	4.30315	3.80652	0.784348	1.24813	0.555187	0.0133889	0.463333	10	16.7952	1.15491	0.00253554	0.515325	10.492	20.324
Phox2bKO_NT E3 cre mutant NTx40- (108)	2.52007	0.194792	0.0784543	5.13367	0.273635	2.53266	3.23553	2.11502	0.943112	4.04605	0.801825	0.00852222	0.156667	4	19.6748	1.04661	0.00140646	0.161479	6.81123	7.37943
Phox2bKO_NT E3 cre mutant NTx40- (109)	2.39945	0.223811	0.170428	4.46806	0.171799	1.75909	3.04527	1.7395	0.94986	1.60699	0.616415	0.00663333	0.148333	0	10.1114	1.02582	0.00113948	0.204636	2.76623	3.12965
Phox2bKO_NT E3 cre mutant NTx40- (11)	2.59009	0.179704	0.204649	5.56471	0.239364	2.70391	2.5204	1.7141	0.993164	1.83962	0.647841	0.00668889	0.23	10	19.8564	1.07224	0.00106232	0.146951	1.41833	3.59384
Phox2bKO_NT E3 cre mutant NTx40- (110)	2.33138	0.242057	0.14498	4.13126	0.263476	1.81	4.29979	2.84292	0.853543	1.47368	0.595745	0.00678889	0.141667	0	10.9038	1.019	0.00113059	0.567822	6.11567	8.76839
Phox2bKO_NT E3 cre mutant NTx40- (111)	2.31944	0.245407	0.17488	4.07486	0.449236	2.05732	5.78902	4.04857	0.753274	1.46305	0.594	0.00555556	0.151667	5	19.4478	0.985797	0.000908783	0.5	9.02899	21.2973
Phox2bKO_NT E3 cre mutant NTx40- (112)	2.21791	0.275836	0.553773	3.62534	0.389203	2.19178	2.39944	1.44419	0.969081	1.35741	0.575806	0.00688889	0.05	6	5.17927	1.05595	0.00130418	0.0898027	1.92568	1.94548
Phox2bKO_NT E3 cre mutant NTx40- (113)	2.60686	0.176269	0.0827485	5.67315	0.308729	2.56538	4.61273	2.9629	0.813841	4.02283	0.800909	0.0122222	0.298333	1.33333	29.7889	1.13912	0.00214422	0.13484	5.82874	12.6175
Phox2bKO_NT E3 cre mutant NTx40- (114)	2.57873	0.182071	0.227064	5.49236	0.259461	2.8	2.3543	1.74809	1.00084	1.37204	0.578422	0.0111222	0.293333	2.66667	17.9689	1.11856	0.00200673	0.27005	3.63389	7.14321
Phox2bKO_NT E3 cre mutant NTx40- (115)	2.63426	0.170796	0.241145	5.85495	0.260999	2.95673	1.99509	1.31409	0.988484	2.05923	0.673121	0.00975556	0.358333	1.57143	25.599	1.08773	0.00161766	0.438729	1.9959	2.00949
Phox2bKO_NT E3 cre mutant NTx40- (116)	2.70105	0.158155	0.0848353	6.32292	0.258429	3.12	2.35834	1.87426	0.970658	4.24242	0.809249	0.0134556	0.398333	3	27.7806	1.13655	0.00240474	0.363486	1.9037	6.87967
Phox2bKO_NT E3 cre mutant NTx40- (117)	2.74013	0.151195	0.0740302	6.61397	0.206142	2.40798	4.749	3.14927	0.801875	2.54747	0.718109	0.0124556	0.733333	5.5	24.0012	1.14244	0.00209022	0.267142	12.3157	14.2284
Phox2bKO_NT E3 cre mutant NTx40- (118)	2.89606	0.12635	0.215795	7.91454	0.23457	3.90909	1.9674	1.28725	1.0198	2.6469	0.725795	0.0150333	0.466667	5	36.7617	1.16447	0.00258734	0.243162	1.31943	1.75372
Phox2bKO_NT E3 cre mutant NTx40- (119)	2.27672	0.257777	0.864277	3.87932	0.481159	2.72956	2.09581	1.47921	1.01436	1.3271	0.570281	0.0110667	0.06	6	5.72007	1.1051	0.00230108	0.158431	1.11276	1.22298
Phox2bKO_NT E3 cre mutant NTx40- (12)	2.50773	0.197579	0.286491	5.06126	0.377583	3.21512	1.7935	1.39136	1.03379	2.86179	0.741053	0.0105556	0.211667	2.25	15.6605	1.10446	0.00196846	0.45422	2.01975	2.02155
Phox2bKO_NT E3 cre mutant NTx40- (120)	2.74737	0.149941	0.108129	6.66927	0.216316	3.01569	2.26962	1.83015	0.972218	3.16535	0.759924	0.0117556	0.333333	5.5	25.791	1.13093	0.00198917	0.153719	1.94578	5.32956
Phox2bKO_NT E3 cre mutant NTx40- (121)	2.74862	0.149725	0.128523	6.67892	0.211722	2.96512	2.53341	1.57339	0.964834	3.76712	0.79023	0.0116	0.336667	4	21.4412	1.15301	0.0019327	0.40234	1.05982	1.67495
Phox2bKO_NT E3 cre mutant NTx40- (122)	2.60643	0.176356	0.151909	5.67034	0.231421	2.62332	1.66966	1.2535	0.961702	2.93953	0.746163	0.00941111	0.488333	2.75	22.0316	1.10055	0.00159124	0.543286	2.80007	2.94402
Phox2bKO_NT E3 cre mutant NTx40- (123)	2.2864	0.25492	0.114711	3.9228	0.296875	1.83425	4.06146	2.54782	0.858177	1.54464	0.607018	0.00633333	0.165	4	8.74277	1.02648	0.00110145	0.670166	2.14258	7.07091
Phox2bKO_NT E3 cre mutant NTx40- (124)	2.27303	0.258875	0.766499	3.86287	0.351931	2.12571	2.54722	1.72347	0.927611	0.692661	0.409214	0.0082	0.101667	8	10.7583	1.04026	0.00159228	0.184053	1.18879	1.62265
Phox2bKO_NT E3 cre mutant NTx40- (125)	2.43117	0.215785	0.099201	4.63424	0.313886	2.0625	5.47677	4.80815	0.794381	1.26535	0.558567	0.0114778	0.621667	10	5.43501	1.14525	0.00215184	0.705393	34.0255	37.1661
Phox2bKO_NT E3 cre mutant NTx40- (126)	2.56813	0.184307	0.0434871	5.42574	0.142826	1.79273	5.17388	3.61894	0.874281	1.869	0.651446	0.0073	0.411667	0	13.1425	1.02541	0.00117246	0.384241	19.0562	21.2496
Phox2bKO_NT E3 cre mutant NTx40- (127)	2.54226	0.189879	0.094673	5.26652	0.33525	3.02353	2.82673	2.21614	0.991531	4.22759	0.808707	0.00842222	0.315	2	17.3067	1.06151	0.00143506	0.662808	5.7577	8.78485
Phox2bKO_NT E3 cre mutant NTx40- (128)	2.64766	0.16818	0.0610659	5.94602	0.173609	1.96403	4.3924	3.23448	0.792748	2.56915	0.719821	0.00745556	0.493333	14	24.5983	1.04751	0.00110381	0.397458	8.57031	11.5816
Phox2bKO_NT E3 cre mutant NTx40- (129)	2.25739	0.263578	0.231416	3.79394	0.449328	2.48077	2.22871	1.85078	0.975469	2.60784	0.722826	0.00408889	0.0533333	2	9.3985	0.992828	0.000678932	0.379502	2.96569	5.88769
Phox2bKO_NT E3 cre mutant NTx40- (13)	2.8871	0.12766	0.120823	7.83333	0.173052	3.26255	1.86682	1.20464	1.0012	3.30698	0.767819	0.0102889	0.461667	6.66667	38.2911	1.13909	0.00153043	0.470513	1.60493	1.60505
Phox2bKO_NT E3 cre mutant NTx40- (130)	2.37596	0.229946	0.125323	4.34884	0.442045	2.82895	3.14945	2.3107	0.978403	3.77301	0.790488	0.00864444	0.296667	2.5	13.7626	1.06238	0.00158076	0.561168	10.0951	11.2973
Phox2bKO_NT E3 cre mutant NTx40- (131)	2.46893	0.206604	0.121686	4.84017	0.296469	2.16931	5.12596	3.15583	0.823135	1.52655	0.604203	0.00634444	0.203333	6	16.3043	1.02051	0.00101962	0.426775	9.3385	9.54537
Phox2bKO_NT E3 cre mutant NTx40- (132)	2.2777	0.257487	0.444284	3.8837	0.512214	2.50714	3.71327	2.50525	0.902002	0.867816	0.464615	0.00722222	0.0466667	4	5.29801	1.05684	0.00134912	0.156893	5.38294	6.37819
Phox2bKO_NT E3 cre mutant NTx40- (133)	2.1154	0.310388	0.400994	3.22178	0.591187	2.51	2.43643	1.73696	1.01325	1.50259	0.600414	0.00536667	0.0216667	2	1.98621	1.04304	0.000986682	0.34653	2.12165	5.45513
Phox2bKO_NT E3 cre mutant NTx40- (134)	2.42099	0.218327	0.187266	4.58028	0.309543	2.3985	2.88878	2.39055	0.94121	1.3681	0.57772	0.00428889	0.121667	0	11.6637	1.00713	0.000642273	0.274098	3.00091	7.20589
Phox2bKO_NT E3 cre mutant NTx40- (135)	2.00748	0.351451	0.931195	2.84535	0.640608	2.42574	2.09255	1.71992	1.06516	0.625344	0.384746	0.00655556	0.065	2	1.42731	1.02962	0.00132136	0.184115	2.7024	3.14934
Phox2bKO_NT E3 cre mutant NTx40- (136)	2.02199	0.345628	0.135656	2.89328	0.545534	1.46286	6.03229	5.02227	0.684542	2.06897	0.674157	0.00692222	0.0866667	1.33333	14.4857	1.04617	0.00119386	0.126694	3.1861	45.6668
Phox2bKO_NT E3 cre mutant NTx40- (137)	2.73325	0.152398	0.232023	6.56176	0.243028	2.98734	2.79492	1.96837	0.923499	1.79153	0.641773	0.0183	0.795	2.4	43.7323	1.20061	0.00335921	0.369611	3.04449	3.10625
Phox2bKO_NT E3 cre mutant NTx40- (138)	2.73283	0.152472	0.0743778	6.55859	0.241534	3.26794	2.176	1.4241	1.01385	5.34559	0.84241	0.00958889	0.61	1.71429	31.3631	1.1204	0.00149195	1.20351	1.21803	2.55414
Phox2bKO_NT E3 cre mutant NTx40- (139)	2.70629	0.157203	0.0645562	6.36119	0.214362	2.50588	3.91097	2.36871	0.850841	3.69591	0.787049	0.00892222	0.336667	1.6	32.8101	1.07575	0.00140031	0.490254	6.91796	9.36204
Phox2bKO_NT E3 cre mutant NTx40- (14)	2.51991	0.194827	0.310688	5.13275	0.305575	2.88938	1.84813	1.31359	1.01835	2.11111	0.678571	0.0143111	0.315	3.66667	19.3364	1.17877	0.00274014	0.290908	1.32074	1.87097
Phox2bKO_NT E3 cre mutant NTx40- (140)	2.67669	0.162652	0.084738	6.14811	0.284526	3.0427	2.87779	2.11325	0.927806	3.66364	0.785575	0.0171	1.42333	1.57143	26.799	1.18117	0.00315792	1.19344	4.9622	12.6711
Phox2bKO_NT E3 cre mutant NTx40- (141)	2.70957	0.15661	0.119702	6.3853	0.208753	2.61317	2.7555	1.91473	0.895714	2.72986	0.731893	0.00874444	0.295	12	21.7778	1.06757	0.00141824	0.328641	1.21275	4.51809
Phox2bKO_NT E3 cre mutant NTx40- (142)	2.49246	0.201084	0.180029	4.97305	0.281184	2.51515	2.21279	1.85585	0.953775	2.16667	0.684211	0.00886667	0.203333	0	17.2326	1.07558	0.00150347	0.111943	1.55392	5.00676
Phox2bKO_NT E3 cre mutant NTx40- (143)	2.42634	0.216988	0.591158	4.60854	0.328512	2.86111	1.63443	1.2169	1.08317	1.58537	0.613208	0.00706667	0.0666667	3	17.6641	1.01291	0.0012204	0.168232	1.02649	1.08186
Phox2bKO_NT E3 cre mutant NTx40- (15)	2.59033	0.179655	0.134241	5.56621	0.234218	2.62264	1.798	1.29523	0.973574	4.63121	0.822418	0.00882222	0.205	2	30.0153	1.08739	0.00139701	0.191112	1.6303	1.63106
Phox2bKO_NT E3 cre mutant NTx40- (16)	2.83465	0.135606	0.145537	7.37428	0.200578	3.49785	2.00726	1.6719	1.05911	2.96735	0.747942	0.0108	0.438333	6	27.3466	1.12056	0.0016439	0.585314	2.06011	2.07902
Phox2bKO_NT E3 cre mutant NTx40- (17)	2.62823	0.171985	0.268415	5.81447	0.270981	2.98347	2.21719	1.68921	0.985696	1.58861	0.613692	0.0136333	0.178333	4.5	22.4436	1.14401	0.00245653	0.171289	1.11832	3.5541
Phox2bKO_NT E3 cre mutant NTx40- (18)	2.48189	0.203545	0.0971989	4.91291	0.278475	2.08654	4.65281	2.90221	0.804811	3.40426	0.772947	0.0069	0.23	2.5	18.8021	1.02362	0.00115271	0.380693	6.09956	9.08795
Phox2bKO_NT E3 cre mutant NTx40- (19)	2.66542	0.164777	0.113204	6.06881	0.193781	2.19931	3.80017	2.90496	0.823242	1.44475	0.59096	0.00983333	0.485	16	25.2868	1.08976	0.00154428	0.430477	4.73058	9.79041
Phox2bKO_NT E3 cre mutant NTx40- (2)	2.26272	0.261965	0.101704	3.81731	0.412961	2.04142	5.10018	3.20112	0.832186	2.71429	0.730769	0.00722222	0.25	0	11.2189	1.06644	0.00125401	0.612686	16.5779	21.9625
Phox2bKO_NT E3 cre mutant NTx40- (20)	2.83319	0.135835	0.0790084	7.36187	0.126053	2.82918	1.8826	1.50773	1.08242	3.57143	0.78125	0.0103111	0.67	3.6	37.5517	1.10258	0.00156593	0.238981	1.97775	2.15804
Phox2bKO_NT E3 cre mutant NTx40- (21)	2.91831	0.123154	0.0867917	8.11989	0.224163	4.07273	1.88273	1.5446	1.05938	8.28834	0.892338	0.0168222	0.776667	2.3	74.3812	1.21157	0.00273191	0.236944	1.55228	2.24398
Phox2bKO_NT E3 cre mutant NTx40- (22)	2.77543	0.145174	0.162757	6.88827	0.20335	3.17391	2.543	2.16062	1.02179	1.95862	0.662005	0.0143	0.385	6	36.3568	1.18504	0.00248256	0.11493	5.18507	5.38117
Phox2bKO_NT E3 cre mutant NTx40- (23)	2.78207	0.144069	0.132649	6.94112	0.245997	3.48485	1.9668	1.43967	1.01225	3.53896	0.779685	0.0155333	0.465	1.2	37.4349	1.1723	0.00271666	0.519299	1.23253	2.65356
Phox2bKO_NT E3 cre mutant NTx40- (24)	2.72949	0.153059	0.231665	6.53341	0.243004	3.4593	1.4422	1.06218	1.07409	2.83721	0.739394	0.00733333	0.158333	0	13.7787	1.08014	0.00108863	0.443813	1.11497	1.15993
Phox2bKO_NT E3 cre mutant NTx40- (25)	2.37459	0.230308	0.148587	4.342	0.303126	2.26596	2.1949	1.64346	0.947872	3.55952	0.780679	0.00851111	0.226667	2.5	16.7224	1.05472	0.00147483	0.357683	1.72065	3.7788
Phox2bKO_NT E3 cre mutant NTx40- (26)	2.59524	0.178643	0.384445	5.59776	0.325492	3.11894	2.2536	1.88982	0.976614	1.46228	0.593873	0.0141444	0.235	2.66667	30.1601	1.16296	0.00272067	0.0626716	1.01173	3.84792
Phox2bKO_NT E3 cre mutant NTx40- (27)	2.85847	0.131937	0.0954781	7.57935	0.201051	3.32155	2.03445	1.21183	0.977363	5.83799	0.853758	0.0136	0.573333	2.71429	52.3981	1.16691	0.00223166	0.412231	1.09977	1.79559
Phox2bKO_NT E3 cre mutant NTx40- (28)	2.78022	0.144376	0.0562496	6.92634	0.168833	2.6246	1.90289	1.54113	0.92221	4.83422	0.828598	0.0121222	0.771667	3.33333	38.2699	1.12934	0.00196801	0.696988	1.78178	5.05538
Phox2bKO_NT E3 cre mutant NTx40- (29)	2.65682	0.166415	0.247813	6.00906	0.398215	4.06696	1.56049	1.24379	1.07252	3.46098	0.775834	0.0203222	0.608333	2.16667	25.9789	1.23123	0.00404648	0.465895	2.54173	2.58049
Phox2bKO_NT E3 cre mutant NTx40- (3)	2.79259	0.142335	0.148844	7.02567	0.20109	3.275	2.13119	1.52313	1.03951	2.14196	0.681727	0.0110667	0.52	4	37.7025	1.12013	0.00182144	0.539597	3.50771	3.96506
Phox2bKO_NT E3 cre mutant NTx40- (30)	2.73611	0.151897	0.0424591	6.5834	0.118311	2.10526	2.93068	2.04462	0.929702	3.30964	0.767962	0.00943333	0.795	10	35.9034	1.11625	0.0013818	0.790104	2.42018	3.76386
Phox2bKO_NT E3 cre mutant NTx40- (31)	3.06841	0.10361	0.05376	9.65157	0.13491	3.22195	2.08072	1.56241	0.908862	4.68127	0.823983	0.0158444	1.075	6.5	56.6502	1.18221	0.00242461	0.371684	2.34906	3.65606
Phox2bKO_NT E3 cre mutant NTx40- (32)	2.82144	0.137684	0.0815321	7.26302	0.181751	3.17323	2.42924	1.66694	1.02482	2.69811	0.729592	0.0108889	0.831667	3.16667	40.8965	1.11438	0.0016457	0.83054	4.55623	4.55851
Phox2bKO_NT E3 cre mutant NTx40- (33)	2.16584	0.292876	0.934721	3.41442	0.563408	2.78095	1.45499	1.06674	1.08509	1.22989	0.551546	0.00646667	0.01	0	5.76012	1.08293	0.00126755	0.0414513	1.85495	1.95006
Phox2bKO_NT E3 cre mutant NTx40- (34)	2.77941	0.14451	0.162247	6.91994	0.20612	3.14403	2.9546	1.98132	1.00075	2.50181	0.714433	0.0107778	0.488333	2.8	37.404	1.11136	0.00182727	0.47407	3.31179	3.31194
Phox2bKO_NT E3 cre mutant NTx40- (35)	2.83266	0.135917	0.105486	7.35743	0.216064	3.21014	2.24203	1.85118	0.938657	3.56126	0.780763	0.0128222	0.64	1.57143	53.7181	1.1357	0.00212507	0.171647	1.7309	5.25216
Phox2bKO_NT E3 cre mutant NTx40- (36)	2.48351	0.203165	0.10452	4.92211	0.200992	2.16038	3.20683	2.1886	0.979015	2.3125	0.698113	0.00765556	0.563333	1.33333	22.921	1.03377	0.00126195	0.591424	4.83504	7.12631
Phox2bKO_NT E3 cre mutant NTx40- (37)	2.74251	0.150782	0.0814195	6.63209	0.214755	2.68551	3.28631	2.64053	0.873785	3.40928	0.773206	0.0116111	0.485	2.75	32.8824	1.1253	0.00197423	0.360754	5.53659	5.53796
Phox2bKO_NT E3 cre mutant NTx40- (38)	2.35094	0.236667	0.181542	4.22535	0.463073	2.48023	3.35141	2.50591	0.862588	2.63983	0.725262	0.00954444	0.278333	1.16667	18.3772	1.08906	0.00178209	0.778046	4.7776	10.6262
Phox2bKO_NT E3 cre mutant NTx40- (39)	2.28161	0.256329	0.16379	3.90123	0.292385	1.83553	3.60325	2.53678	0.870124	1.59236	0.614251	0.00452222	0.161667	2	12.544	0.976743	0.000754493	0.547498	3.39895	9.66745
Phox2bKO_NT E3 cre mutant NTx40- (4)	2.56326	0.185343	0.385991	5.3954	0.362106	3.44099	2.02885	1.45158	1.05984	1.55793	0.609058	0.00932222	0.371667	4.5	24.9883	1.10129	0.00169165	0.34002	2.46346	2.63769
Phox2bKO_NT E3 cre mutant NTx40- (40)	2.02101	0.346021	0.912354	2.89	0.740834	2.43137	3.15011	2.11847	0.977447	0.636872	0.389078	0.00651111	0.0183333	0	0.859649	1.07094	0.00131636	0.123929	3.57233	4.32444
Phox2bKO_NT E3 cre mutant NTx40- (41)	2.21369	0.277179	0.16034	3.60777	0.298246	1.79085	3.10359	1.94768	0.908935	3.33019	0.769063	0.0051	0.111667	2	6.25779	0.988401	0.00087864	0.396059	1.97556	3.58795
Phox2bKO_NT E3 cre mutant NTx40- (42)	2.5565	0.18679	0.0768156	5.35361	0.239319	2.16736	3.70137	2.72621	0.827554	3.86928	0.794631	0.00827778	0.396667	0	13.0811	1.1338	0.00135291	0.813477	5.10158	7.58895
Phox2bKO_NT E3 cre mutant NTx40- (43)	2.4609	0.208524	0.405162	4.79561	0.189994	2.09479	1.63214	1.30732	1.00213	1.23841	0.553254	0.00751111	0.166667	16	11.2968	1.05754	0.00129761	0.138675	1.01819	1.46224
Phox2bKO_NT E3 cre mutant NTx40- (44)	2.58068	0.181662	0.557151	5.50471	0.375748	3.58511	1.65507	1.12946	1.06248	1.70522	0.630344	0.0132556	0.138333	1.66667	36.6436	1.16375	0.00249364	0.349829	1.24346	1.24408
Phox2bKO_NT E3 cre mutant NTx40- (45)	2.35427	0.235759	0.338697	4.24161	0.485179	2.90698	3.06621	2.20502	0.983919	1.488	0.598071	0.00691111	0.0316667	1.5	15.9382	1.0226	0.00124405	0.120289	6.17772	7.63858
Phox2bKO_NT E3 cre mutant NTx40- (46)	2.73987	0.15124	0.0721592	6.61199	0.229015	2.92053	3.18236	2.52225	0.922991	2.96639	0.747881	0.0157333	0.688333	1.71429	34.8102	1.17902	0.00276298	0.664899	3.88484	11.6478
Phox2bKO_NT E3 cre mutant NTx40- (47)	2.71942	0.154845	0.0470682	6.45808	0.180532	2.42671	2.85985	2.23815	0.884377	4.21675	0.80831	0.0117667	0.621667	4.5	30.6589	1.12615	0.00187847	0.61765	1.77779	11.2711
Phox2bKO_NT E3 cre mutant NTx40- (48)	2.43539	0.214738	0.108554	4.65683	0.406522	2.93985	3.63515	2.83864	0.990131	2.84247	0.73975	0.00623333	0.398333	1.6	18.2386	1.00981	0.00103572	1.08136	16.891	16.9395
Phox2bKO_NT E3 cre mutant NTx40- (49)	2.72139	0.154493	0.0999127	6.47277	0.310044	3.3434	3.86472	2.72588	0.927655	3.54573	0.780013	0.0165667	0.471667	1.66667	37.9192	1.1846	0.0030401	0.231636	9.4435	9.88089
Phox2bKO_NT E3 cre mutant NTx40- (5)	2.63096	0.171445	0.125149	5.83277	0.190747	2.91304	1.66756	1.21047	1.14352	3.63448	0.784226	0.00746667	0.361667	10	12.759	1.08069	0.00118086	0.598858	1.43449	1.90468
Phox2bKO_NT E3 cre mutant NTx40- (50)	2.73018	0.152938	0.228391	6.53859	0.260304	3.37054	1.65945	1.09024	1.01036	3.08077	0.754948	0.0117889	0.191667	4.5	30.382	1.14125	0.00204784	0.122801	1.09185	1.38319
Phox2bKO_NT E3 cre mutant NTx40- (51)	2.56171	0.185673	0.201888	5.38582	0.268908	2.5288	2.61601	2.14162	0.905441	1.31884	0.56875	0.00711111	0.21	12	18.4725	1.10743	0.00120137	0.397256	1.19107	6.8378
Phox2bKO_NT E3 cre mutant NTx40- (52)	2.85059	0.13314	0.134895	7.5109	0.268456	4.32946	1.98988	1.45102	1.11251	5.08997	0.835795	0.0195556	1.21333	2.22222	45.2508	1.22736	0.00351446	0.57653	2.3997	2.87684
Phox2bKO_NT E3 cre mutant NTx40- (53)	2.38545	0.227447	0.0935721	4.39663	0.424551	2.61006	4.08613	3.54476	0.9111	2.96089	0.747532	0.00787778	0.196667	1.5	16.3189	1.03063	0.0013554	1.07412	24.3779	25.2794
Phox2bKO_NT E3 cre mutant NTx40- (54)	2.06686	0.328227	0.896067	3.04667	0.636364	2.18045	4.098	2.46615	0.897157	0.521097	0.34258	0.00801111	0.0583333	0	5.24696	1.0423	0.00165239	0.105336	4.46957	4.86957
Phox2bKO_NT E3 cre mutant NTx40- (55)	2.42985	0.216112	0.206317	4.62724	0.38034	2.62222	2.63534	2.3544	0.918886	1.97842	0.664251	0.0092	0.225	3.5	17.1073	1.10722	0.00163369	0.575255	2.58609	6.89902
Phox2bKO_NT E3 cre mutant NTx40- (56)	2.76009	0.147761	0.166752	6.76769	0.242424	3.15385	2.16052	1.53117	0.946482	2.4717	0.711957	0.0143111	0.525	1.75	41.4667	1.1679	0.00254145	0.236433	2.43363	3.14297
Phox2bKO_NT E3 cre mutant NTx40- (57)	2.35197	0.236385	0.287057	4.23038	0.494613	3.00893	2.68656	1.99219	1.01135	1.61658	0.617822	0.00561111	0.065	3	15.2596	1.02307	0.000942826	0.535844	6.11428	6.11462
Phox2bKO_NT E3 cre mutant NTx40- (58)	2.94178	0.119871	0.035533	8.34228	0.200147	3.36207	2.55208	1.83306	0.900838	9.35238	0.903404	0.0120778	1.045	3.2	48.8401	1.15688	0.00177353	1.00138	2.60386	3.49476
Phox2bKO_NT E3 cre mutant NTx40- (59)	2.89962	0.125833	0.183893	7.94702	0.227569	3.69498	1.77791	1.32807	0.974657	3.78838	0.791161	0.0128222	0.546667	1.42857	54.4677	1.16076	0.00208798	0.249783	1.41378	1.45535
Phox2bKO_NT E3 cre mutant NTx40- (6)	2.62326	0.172971	0.344038	5.78131	0.280891	2.93117	2.17939	1.41944	0.956635	1.70716	0.630609	0.0138667	0.475	3.25	23.8488	1.17085	0.00267143	0.433013	1.07299	2.71348
Phox2bKO_NT E3 cre mutant NTx40- (60)	2.60779	0.17608	0.139582	5.67925	0.285152	2.99177	1.98053	1.20916	0.986505	3.51211	0.778374	0.0144889	0.538333	1.6	19.866	1.17098	0.00273503	0.756364	2.07317	3.4532
Phox2bKO_NT E3 cre mutant NTx40- (61)	2.61248	0.175132	0.0829355	5.70996	0.207809	2.36515	3.0151	2.06106	0.90864	2.6713	0.727617	0.00881111	0.265	2.66667	15.6412	1.06718	0.00142547	0.454763	1.40131	5.43307
Phox2bKO_NT E3 cre mutant NTx40- (62)	2.09812	0.316626	1.33031	3.1583	0.621	2.53636	1.70968	1.38285	1.01909	0.533333	0.347826	0.0069	0.00333333	0.5	5.35185	1.08643	0.0013858	0.113501	2.1701	2.41682
Phox2bKO_NT E3 cre mutant NTx40- (64)	2.89995	0.125785	0.0589684	7.95005	0.231862	3.6306	3.94965	2.89948	0.948405	4.16017	0.806208	0.0132444	0.741667	2.71429	55.5265	1.1475	0.00207692	0.194298	12.6238	13.0559
Phox2bKO_NT E3 cre mutant NTx40- (65)	2.70983	0.156563	0.167335	6.38719	0.253151	3.17978	2.06436	1.47305	0.989456	2.63307	0.724751	0.0156222	0.295	4.66667	33.2247	1.20477	0.00280767	0.430025	2.47294	3.05811
Phox2bKO_NT E3 cre mutant NTx40- (66)	1.98417	0.361011	0.751093	2.77	0.705618	2.175	3.41901	2.22567	0.934749	0.914634	0.477707	0.00348889	0	0	1.70667	0.961653	0.000626948	0.0564333	3.24452	4.55495
Phox2bKO_NT E3 cre mutant NTx40- (67)	2.03242	0.341502	1.19283	2.92824	0.682104	2.4878	2.18327	1.86248	1.02869	0.54078	0.350978	0.00965556	0.005	0	6.34754	1.10167	0.00208371	0.101768	1.00487	3.56003
Phox2bKO_NT E3 cre mutant NTx40- (68)	2.38479	0.227621	0.707885	4.39327	0.444444	3.11656	1.81966	1.18944	1.06409	1.08219	0.519737	0.0118222	0.0333333	1.66667	14.0036	1.12862	0.0023505	0.130066	1.79205	1.8399
Phox2bKO_NT E3 cre mutant NTx40- (69)	2.74656	0.15008	0.132058	6.66311	0.317672	3.53648	3.32778	2.77321	0.941684	2.67674	0.72802	0.0135222	0.501667	1.57143	38.6287	1.15187	0.00237529	0.320486	9.24333	11.177
Phox2bKO_NT E3 cre mutant NTx40- (7)	2.99624	0.112586	0.0552078	8.88212	0.137538	3.20282	2.18471	1.43574	0.972308	5.86316	0.854294	0.0144889	0.726667	2.57143	54.3232	1.16211	0.00221544	0.138462	1.7193	1.93034
Phox2bKO_NT E3 cre mutant NTx40- (70)	2.68462	0.161174	0.410893	6.20448	0.323077	3.58744	1.60468	1.11365	1.01725	2	0.666667	0.0147	0.533333	1.375	32.7664	1.16638	0.00279666	0.393638	1.19259	1.36648
Phox2bKO_NT E3 cre mutant NTx40- (71)	2.6267	0.172288	0.132218	5.80422	0.312672	3.02439	2.57971	1.96676	0.931857	3.56281	0.780837	0.0100889	0.2	1.125	28.842	1.13409	0.00176811	0.234662	3.32953	6.77317
Phox2bKO_NT E3 cre mutant NTx40- (72)	2.62956	0.171722	0.428765	5.82338	0.337694	3.40625	1.96862	1.16897	1.00656	2.36715	0.703013	0.00774444	0.0883333	6	26.0592	1.0653	0.00127508	0.30538	1.01372	1.03933
Phox2bKO_NT E3 cre mutant NTx40- (73)	2.64695	0.168318	0.24802	5.94115	0.358214	3.36869	2.65307	1.86441	0.947368	2.54417	0.717846	0.0111444	0.18	3.33333	33.8	1.15372	0.00197051	0.246612	3.04576	4.13261
Phox2bKO_NT E3 cre mutant NTx40- (74)	2.21298	0.277405	0.185212	3.60484	0.429544	1.99379	3.46615	2.52266	0.843898	2.42935	0.708399	0.00701111	0.163333	6	8.87919	1.05751	0.00122087	0.716569	1.16404	6.79605
Phox2bKO_NT E3 cre mutant NTx40- (75)	2.42351	0.217695	0.304667	4.59358	0.391368	3.00654	2.28779	1.65183	1.04622	2.59459	0.721805	0.00886667	0.185	4	13.4444	1.07446	0.00162107	0.391002	2.24003	2.26194
Phox2bKO_NT E3 cre mutant NTx40- (76)	2.34025	0.239597	0.364209	4.17368	0.44665	2.70068	1.88115	1.28197	0.968211	2.41232	0.706944	0.008	0.0333333	4	8.55796	1.05055	0.00148039	0.283823	1.75827	2.32842
Phox2bKO_NT E3 cre mutant NTx40- (77)	2.60781	0.176075	0.300282	5.67939	0.342184	3.36464	1.75206	1.03432	1.01276	2.99563	0.749727	0.0101667	0.108333	1.33333	23.5117	1.12596	0.00183046	0.441062	1.07989	1.2808
Phox2bKO_NT E3 cre mutant NTx40- (78)	2.35825	0.234681	0.222281	4.26109	0.373702	2.53714	2.27803	1.39965	0.974004	3.27723	0.766204	0.0096	0.261667	6	11.4335	1.10742	0.00175608	0.693889	1.72153	1.7648
Phox2bKO_NT E3 cre mutant NTx40- (79)	2.39293	0.225496	0.289984	4.43467	0.382369	2.62893	3.57351	3.05045	0.958686	1.03161	0.507779	0.00785556	0.09	0	11.4095	1.04954	0.001425	0.271201	12.7033	14.5617
Phox2bKO_NT E3 cre mutant NTx40- (8)	2.8495	0.133307	0.0539869	7.50149	0.194133	2.98855	2.80527	1.67064	0.904197	6.04878	0.858131	0.00963333	0.393333	3.25	38.8441	1.09048	0.00143262	0.107397	1.43834	4.57011
Phox2bKO_NT E3 cre mutant NTx40- (80)	2.2287	0.272432	0.948031	3.67065	0.557841	2.72131	2.42739	1.66234	0.992614	0.854701	0.460829	0.00723333	0.025	2	14.9633	1.05568	0.00140311	0.235159	1.07914	1.99712
Phox2bKO_NT E3 cre mutant NTx40- (81)	2.37481	0.230251	0.278362	4.34308	0.312532	2.2426	2.82627	1.93025	0.923649	1.30418	0.566007	0.00673333	0.14	3.5	19.1283	1.08747	0.00115399	0.385376	1.07785	4.59851
Phox2bKO_NT E3 cre mutant NTx40- (82)	1.74261	0.476759	2.50125	2.0975	0.937695	2.38889	1.39788	1.06997	1.17615	0.393519	0.282392	0.00334444	0	0	0.105882	0.938614	0.00064451	0	1.13368	1.22513
Phox2bKO_NT E3 cre mutant NTx40- (83)	2.45434	0.210105	0.279598	4.75952	0.355066	2.73714	2.00202	1.37304	0.965117	2.59821	0.722084	0.00895556	0.201667	2.5	16.1667	1.11074	0.00161283	0.332298	1.97305	2.33147
Phox2bKO_NT E3 cre mutant NTx40- (84)	2.162	0.294176	0.350667	3.39933	0.369369	1.96774	2.04175	1.64989	0.952456	2.7963	0.736585	0.00455556	0.0766667	6	11.1391	0.981203	0.000776992	0.069843	1.97482	2.34334
Phox2bKO_NT E3 cre mutant NTx40- (85)	2.29115	0.253531	0.235665	3.94429	0.47729	2.32895	5.36723	3.90865	0.854672	1.35662	0.575663	0.00712222	0.113333	4	12.1653	1.03048	0.00128313	0.212701	18.6429	18.6431
Phox2bKO_NT E3 cre mutant NTx40- (86)	2.28673	0.254824	0.39332	3.92427	0.373215	2.53642	2.48506	1.81594	1.05799	1.21637	0.548813	0.00842222	0.09	1.75	15.0024	1.09234	0.00156219	0.243653	3.54925	4.31257
Phox2bKO_NT E3 cre mutant NTx40- (87)	2.87295	0.129757	0.111518	7.70672	0.183804	3.31692	2	1.32109	1.0039	4.98846	0.833012	0.0173	1.01333	2.8	35.3092	1.21154	0.00301545	0.544134	1.08953	1.16159
Phox2bKO_NT E3 cre mutant NTx40- (88)	2.74134	0.150985	0.0943195	6.62318	0.224042	2.8871	3.10663	1.91532	0.920936	3.09692	0.755914	0.0103333	0.31	8	32.4339	1.1157	0.00163697	0.282081	2.73501	4.69098
Phox2bKO_NT E3 cre mutant NTx40- (89)	2.43462	0.21493	0.189031	4.65269	0.264471	2.26012	2.10917	1.30441	0.944579	2.10497	0.677936	0.00624444	0.15	0	12.4961	1.03542	0.00102141	0.567507	1.41445	1.91936
Phox2bKO_NT E3 cre mutant NTx40- (9)	2.20416	0.280236	0.294081	3.56842	0.398126	2.03015	3.5528	2.28199	0.901657	1.12058	0.528431	0.0113333	0.146667	0	5.41002	1.10396	0.00226662	0.309965	3.60761	6.38748
Phox2bKO_NT E3 cre mutant NTx40- (90)	2.33937	0.239839	0.152793	4.16947	0.278031	2.02339	3.02424	2.13835	0.920348	1.47964	0.596715	0.00608889	0.075	6	12.526	1.03056	0.00101249	0.528391	1.19621	9.25771
Phox2bKO_NT E3 cre mutant NTx40- (91)	2.61789	0.174045	0.348502	5.74564	0.287564	2.90393	2.42893	1.5825	0.942499	1.43936	0.590056	0.0118444	0.328333	3.33333	17.5278	1.16759	0.00220852	0.282378	1.05631	2.60665
Phox2bKO_NT E3 cre mutant NTx40- (92)	2.55698	0.186687	0.262832	5.35656	0.219048	2.72308	1.86408	1.40515	1.08619	1.77305	0.639386	0.00868889	0.123333	0	12.482	1.06421	0.00153413	0.14304	1.99953	2.5289
Phox2bKO_NT E3 cre mutant NTx40- (93)	2.24577	0.267129	0.479118	3.74352	0.504593	2.64748	3.0701	1.99626	0.995595	1.08967	0.521456	0.00854444	0.0583333	4	6.23441	1.06014	0.00165106	0.144244	4.8529	4.88875
Phox2bKO_NT E3 cre mutant NTx40- (94)	2.15836	0.295409	0.514989	3.38514	0.614991	3	1.86375	1.41405	1.13008	2.19469	0.686981	0.00401111	0.0333333	1.33333	10.0806	0.99085	0.000713952	0.337007	2.86136	3.15254
Phox2bKO_NT E3 cre mutant NTx40- (95)	2.73665	0.151803	0.132085	6.58746	0.216008	2.90041	2.95933	2.14321	0.947343	2.33086	0.699777	0.00995556	0.335	2.8	29.4992	1.09747	0.00161251	0.315167	3.06454	4.02305
Phox2bKO_NT E3 cre mutant NTx40- (96)	2.68581	0.160954	0.109713	6.21297	0.212646	2.70833	2.14522	1.58935	0.945309	3.46667	0.776119	0.00967778	0.211667	1.2	35.0828	1.08744	0.00154459	0.431269	2.62821	3.34203
Phox2bKO_NT E3 cre mutant NTx40- (97)	2.73332	0.152386	0.0614779	6.5623	0.236867	2.51195	5.47922	3.50917	0.786506	2.95652	0.747253	0.0111222	0.413333	2.25	45.7553	1.1188	0.00183292	0.158035	15.4368	22.1427
Phox2bKO_NT E3 cre mutant NTx40- (98)	2.58032	0.181737	0.115255	5.50244	0.256629	2.85859	2.01768	1.41145	1.02552	3.98225	0.799287	0.00935556	0.233333	3.33333	20.6895	1.1216	0.00153434	0.726983	1.76424	2.97252
Phox2bKO_NT E3 cre mutant NTx40- (99)	2.52964	0.192658	0.082383	5.19054	0.226778	2.11982	4.10762	2.54082	0.8576	3.31034	0.768	0.00694444	0.148333	2.2	22.5333	1.03583	0.00112783	0.72111	5.86122	7.29974
Phox2bKO_NT cre 3 non traité (1)	1.96422	0.369398	1.25226	2.70711	0.787149	2.67606	1.43331	1.29595	1.1142	1.07407	0.517857	0.00435556	0.005	0	1.97044	0.991369	0.000827136	0.214286	1.32785	1.57226
Phox2bKO_NT cre 3 non traité (2)	2.72034	0.15468	0.106144	6.46497	0.302615	3.51244	2.82869	2.00129	0.987636	4.82209	0.82824	0.0105444	0.205	2	34.6374	1.11894	0.00181576	0.165521	4.65749	5.00222
Phox2bKO_NT cre 3 non traité (3)	2.48376	0.203106	0.165066	4.92353	0.356647	2.88889	2.63527	2.11018	0.982506	3.30539	0.767733	0.00798889	0.248333	7.5	18.8478	1.07315	0.0013135	0.527413	4.07677	4.93032
Phox2bKO_NT cre 3 non traité (4)	2.34963	0.237023	0.385151	4.21899	0.433752	2.60839	3.017	2.19113	0.938736	1.09428	0.522508	0.00691111	0.17	3.5	12.2123	1.04014	0.00125801	0.256742	5.64331	5.97273
Phox2bKO_NT cre 3 non traité (5)	2.46263	0.208108	0.681903	4.8052	0.41337	2.99355	1.66043	1.1482	0.968959	1.74815	0.636119	0.00824444	0.0566667	2.4	12.5614	1.06884	0.00152614	0.0519174	1.03912	1.25043
Phox2bKO_NT cre 3 non traité (6)	1.89215	0.401358	1.33933	2.49154	0.739353	2.2716	2.16642	1.75134	1.06032	0.528169	0.345622	0.00482222	0.0133333	0	2.40667	1.01694	0.000930296	0.0960031	1.82206	2.57033
Phox2bKO_NT cre 3 non traité (7)	2.48523	0.202764	0.125242	4.93185	0.283019	2.44805	3.45613	2.67855	0.933046	1.73529	0.634409	0.00516667	0.3	10	8.81695	1.00191	0.000827123	0.684702	10.482	12.7625
Phox2bKO_NT cre 3 non traité (8)	2.35624	0.235225	0.282315	4.25124	0.332565	2.33548	2.65743	1.82384	0.952627	1.33603	0.571924	0.00641111	0.188333	8	8.51212	0.998292	0.00110544	0.474661	5.68298	5.88049
Phox2bKO_NT cre non traité x40_DSP (1)	2.32207	0.244663	0.638301	4.08725	0.554839	3.27811	1.50381	1.24698	1.07673	1.5922	0.614227	0.0162444	0.075	3.5	14.2194	1.18643	0.00358962	0.262837	1.13552	3.19106
Phox2bKO_NT cre non traité x40_DSP (10)	2.32342	0.244285	0.6476	4.09358	0.424561	2.71528	2.08147	1.36309	1.01798	1.14793	0.534435	0.00806667	0.0683333	4	11.5696	1.08352	0.00156041	0.0524864	2.38947	2.4568
Phox2bKO_NT cre non traité x40_DSP (11)	2.64891	0.167939	0.370666	5.95453	0.333576	3.41921	2.22204	1.53639	0.994218	2.38916	0.704942	0.0152889	0.14	1.8	40.4165	1.17701	0.00293188	0.145174	1.93795	2.25098
Phox2bKO_NT cre non traité x40_DSP (12)	2.54685	0.188877	0.250754	5.29446	0.439485	3.27684	2.97289	2.43743	0.933601	1.93846	0.659686	0.0106111	0.123333	2	19.2063	1.13868	0.00192667	0.330001	2.26202	7.16412
Phox2bKO_NT cre non traité x40_DSP (13)	2.13118	0.304802	1.28029	3.28082	0.600679	2.57692	1.61374	1.03793	1.01344	1.16735	0.538606	0.0059	0.0233333	2	5.31818	1.05581	0.00114801	0.130189	1.01865	1.02594
Phox2bKO_NT cre non traité x40_DSP (14)	2.17841	0.288669	0.783546	3.46418	0.591019	2.71	1.78529	1.35637	1.01758	1.16444	0.537988	0.00541111	0.02	1.5	9.54198	1.04436	0.000990161	0.231059	1.87384	2.56499
Phox2bKO_NT cre non traité x40_DSP (15)	2.81565	0.138605	0.125945	7.21474	0.164921	2.63636	2.87974	1.71808	0.8998	5.33962	0.842262	0.0112	0.361667	2	42.5206	1.11504	0.00188659	0.201679	1.18405	1.74922
Phox2bKO_NT cre non traité x40_DSP (16)	2.48066	0.203833	1.03094	4.90598	0.558655	3.85326	2.02068	1.31072	1.05083	1.02436	0.506017	0.0184667	0.0666667	1.2	20.0951	1.21492	0.00409855	0.143029	1.42691	1.72195
Phox2bKO_NT cre non traité x40_DSP (17)	2.22988	0.272061	0.647755	3.67565	0.609013	2.70548	2.9434	1.60298	0.943185	0.989177	0.49728	0.0102111	0.0366667	2	7.36105	1.11959	0.00209556	0.0737611	2.36487	3.72641
Phox2bKO_NT cre non traité x40_DSP (2)	2.64966	0.167793	0.224604	5.95972	0.399	3.9693	2.13866	1.81144	1.05439	4.86262	0.829428	0.0203889	0.523333	1.15385	46.1399	1.23197	0.0041391	0.221464	2.17337	2.18462
Phox2bKO_NT cre non traité x40_DSP (3)	2.27015	0.259734	0.459058	3.8501	0.553229	2.96341	2.22812	1.6105	1.03483	2.07767	0.675079	0.00352222	0.0133333	1.33333	14.6542	0.966277	0.000573118	0.0561656	1.32025	2.96991
Phox2bKO_NT cre non traité x40_DSP (4)	2.62907	0.171819	0.642715	5.82009	0.497514	4.58333	1.58945	1.27589	1.11647	2.39266	0.705246	0.0133444	0.0733333	2	22.8111	1.1609	0.00267306	0.0816157	1.28106	1.40266
Phox2bKO_NT cre non traité x40_DSP (5)	2.95519	0.118035	0.0636753	8.47206	0.253876	3.96715	2.60438	2.03159	0.92935	5.96809	0.856489	0.0145556	0.448333	1.2	66.9127	1.18638	0.0024066	0.0828868	4.23583	6.69868
Phox2bKO_NT cre non traité x40_DSP (6)	2.24818	0.266388	0.420645	3.75392	0.518281	2.35519	3.02691	2.31118	0.871483	1.38409	0.580553	0.0116556	0.17	1.33333	12.1445	1.1457	0.00239933	0.310294	2.32475	5.84785
Phox2bKO_NT cre non traité x40_DSP (7)	2.91216	0.124029	0.191587	8.06263	0.328764	4.91593	1.968	1.45765	1.06338	5.29583	0.841165	0.0167889	0.386667	3.33333	41.6208	1.18899	0.00294711	0.253369	1.70845	1.7919
Phox2bKO_NT cre non traité x40_DSP (8)	2.07304	0.325899	1.43952	3.06843	0.673061	2.55372	2.03348	1.4491	1.01445	0.428319	0.299876	0.00896667	0.00666667	0	6.61157	1.09217	0.0019193	0	1.63576	2.85344
Phox2bKO_NT cre non traité x40_DSP (9)	2.64178	0.169322	0.167392	5.90592	0.334731	3.34021	2.35312	1.79194	0.977548	4.80606	0.827766	0.0106444	0.29	1.44444	33.5044	1.12063	0.00189604	0.537721	2.26371	3.91122
WT_NT E1 WT NTx40-11 (1)	2.91712	0.123323	0.164542	8.1088	0.228053	3.98611	1.77122	1.2204	1.02938	3.17539	0.760502	0.0177222	0.525	1.71429	78.2061	1.20062	0.00299012	0.388712	2.1392	2.52654
WT_NT E1 WT NTx40-11 (10)	2.73275	0.152485	0.0744471	6.558	0.157211	2.42216	2.70954	1.6059	0.931512	3.96311	0.798514	0.0134556	0.5	1.125	41.7797	1.13801	0.00233786	0.40333	7.1975	7.28823
WT_NT E1 WT NTx40-11 (11)	2.4609	0.208523	0.338174	4.79564	0.493763	3.09677	2.8813	1.95254	0.918975	2.35673	0.702091	0.0127556	0.0916667	1	19.3859	1.14826	0.00255345	0.131991	2.80577	4.75108
WT_NT E1 WT NTx40-11 (12)	2.56778	0.184381	0.0965775	5.42355	0.302642	3.10484	2.73162	2.38442	1.04062	3.66279	0.785536	0.00445556	0.15	2.5	20.8286	0.991967	0.000621929	0.254633	9.8068	9.81072
WT_NT E1 WT NTx40-11 (13)	2.5053	0.198132	0.188164	5.04714	0.384947	3.11043	2.6983	2.14588	0.993286	2.86058	0.740971	0.00892222	0.105	1.2	24.6067	1.11478	0.00159249	0.214656	5.53555	7.09885
WT_NT E1 WT NTx40-11 (14)	2.41765	0.219169	0.338242	4.56268	0.422272	2.89535	2.29191	1.78329	0.976528	1.9441	0.660338	0.0105333	0.0933333	2	15.9744	1.1377	0.00204737	0.165608	4.37911	5.08512
WT_NT E1 WT NTx40-11 (15)	2.57058	0.183787	0.250069	5.44108	0.364905	3.07143	2.72013	1.82622	0.93447	2.31333	0.698189	0.00552222	0.0433333	2	21.3141	0.991353	0.000874871	0.361642	4.30875	4.76326
WT_NT E1 WT NTx40-11 (17)	2.43187	0.21561	0.378724	4.63801	0.32284	2.41026	2.63689	1.82021	0.914614	1.37727	0.57935	0.00581111	0.0916667	0	17.5875	1.03672	0.000993957	0.0437269	3.94346	3.97643
WT_NT E1 WT NTx40-11 (18)	2.31956	0.245373	0.332879	4.07543	0.331778	2.34884	2.22645	1.53075	1.00059	1.86447	0.650895	0.00868889	0.138333	8	14.8703	1.07502	0.00158913	0.226166	2.00006	2.96651
WT_NT E1 WT NTx40-11 (2)	3.03532	0.107632	0.0490752	9.29087	0.189164	3.95495	2.48337	1.64633	0.978737	7.07576	0.876173	0.0177667	2.22167	1	86.4411	1.20413	0.00286425	0.922582	3.07088	3.12486
WT_NT E1 WT NTx40-11 (21)	2.90347	0.125276	0.183251	7.98235	0.240651	4.14831	1.77767	1.28223	1.05937	3.73123	0.788638	0.0133	0.201667	2.33333	56.5265	1.14171	0.00219998	0.20438	1.24026	1.67339
WT_NT E1 WT NTx40-11 (22)	2.99012	0.113382	0.101216	8.81976	0.198315	4.06169	2.22341	1.64239	1.03412	4.40878	0.815116	0.0177889	0.935	1.18182	84.9724	1.20876	0.00291005	0.450553	1.98491	2.4271
WT_NT E1 WT NTx40-11 (23)	2.64151	0.169375	0.441382	5.90405	0.384673	3.45128	2.75688	1.97571	0.942508	1.22366	0.55029	0.0114889	0.121667	4.5	25.7311	1.15581	0.00218718	0.0439799	1.24386	4.69881
WT_NT E1 WT NTx40-11 (27)	2.24318	0.267927	0.336557	3.73236	0.34641	2.20438	2.11537	1.80187	1.00348	1.33632	0.571977	0.00578889	0.085	0	3.22483	1.05243	0.00103241	0.180637	4.39041	4.88236
WT_NT E1 WT NTx40-11 (28)	2.56726	0.18449	0.24495	5.42035	0.323143	3.11682	2.06091	1.34262	1.01155	3.05724	0.753527	0.0133889	0.308333	4.5	25.1112	1.14205	0.00253549	0.288076	2.02923	2.38181
WT_NT E1 WT NTx40-11 (29)	2.5929	0.179124	0.755008	5.58274	0.390361	3.54598	1.41275	1.16614	1.01661	0.983673	0.495885	0.0108	0.065	4	32.9378	1.16143	0.00201732	0.136083	1.04856	1.96597
WT_NT E1 WT NTx40-11 (3)	2.37691	0.229694	0.389068	4.35361	0.479769	3.12605	2.14506	1.53178	1.03664	1.97949	0.664372	0.00645556	0.0883333	1.33333	11.6295	1.08799	0.00115488	0.519831	3.39892	3.52988
WT_NT E1 WT NTx40-11 (30)	3.07304	0.103059	0.0419419	9.70317	0.175514	3.79883	2.35684	1.59633	0.934504	8.82877	0.898258	0.0159444	1.20333	1.83333	86.5446	1.19044	0.00241285	0.638487	1.44017	4.42771
WT_NT E1 WT NTx40-11 (4)	2.78483	0.143612	0.132012	6.96319	0.198401	3.00794	1.86668	1.18986	0.969814	4.64671	0.822906	0.0104778	0.375	2.16667	36.3711	1.09951	0.00174404	0.237073	1.40008	1.41747
WT_NT E1 WT NTx40-11 (5)	2.17558	0.289612	0.265167	3.4529	0.563099	2.46212	2.7794	2.17544	0.95024	2.61538	0.723404	0.00783333	0.0433333	2	7.53725	1.06803	0.00152735	0.439213	5.3973	8.20289
WT_NT E1 WT NTx40-11 (6)	2.66613	0.164642	0.164355	6.07378	0.297078	3.2243	2.56657	1.80717	0.973959	2.93487	0.745862	0.0114111	0.411667	1.5	27.4478	1.15371	0.00202821	0.3136	1.73418	5.00242
WT_NT E1 WT NTx40-11 (7)	2.5288	0.192843	0.11192	5.18556	0.282563	2.54787	3.21664	1.87251	0.924323	2.65054	0.726068	0.00754444	0.305	4	23.2231	1.05685	0.00122451	0.8495	2.90639	8.04067
WT_NT E1 WT NTx40-11 (8)	2.53427	0.191632	0.170464	5.21833	0.302544	2.8534	2.41576	1.6946	0.994115	3.93182	0.797235	0.00964444	0.313333	4.5	17.1691	1.12969	0.00173165	0.169711	2.75638	2.75713
WT_NT E1 WT NTx40-11 (9)	2.75283	0.149001	0.122356	6.71137	0.298495	3.34599	2.76839	1.94454	0.912525	3.87281	0.794779	0.0123444	0.266667	2	48.5266	1.14572	0.00216464	0.429556	2.8365	5.06535
WT_NT E1 WT x40-1 (1)	2.32091	0.24499	0.211082	4.08181	0.348287	2.12057	3.52733	2.73988	0.880301	1.90476	0.655738	0.00474444	0.0483333	4	9.65714	0.994888	0.000800305	0.108211	5.07122	7.48266
WT_NT E1 WT x40-1 (3)	2.44313	0.212833	0.369816	4.69851	0.253891	2.30058	2.1986	1.35603	0.971748	1.02482	0.50613	0.00634444	0.0366667	0	14.6194	1.02331	0.00101509	0.172547	1.9952	2.07936
WT_NT E1 WT x40-1 (4)	2.6996	0.158419	0.0594101	6.31239	0.190747	2.28105	4.13996	2.64349	0.827392	4.09424	0.8037	0.0108111	0.66	3.33333	36.9565	1.14973	0.00174338	0.330063	2.4921	9.45931
WT_NT E1 WT x40-1 (5)	2.33347	0.241473	0.372161	4.14124	0.4233	2.61635	2.66131	1.98712	0.97105	1.27479	0.560399	0.00892222	0.0683333	4.5	14.58	1.07176	0.00165713	0.291002	1.08801	6.55276
WT_NT E1 WT x40-1 (6)	2.32258	0.244519	0.174154	4.08966	0.364731	2.22297	3.36559	1.89317	0.900037	3.18699	0.761165	0.00572222	0.173333	4	13.5944	1.02687	0.000923383	0.655077	2.11925	2.81259
WT_NT E1 WTNT x40-1 (10)	2.96031	0.117341	0.118734	8.52215	0.157096	3.34111	2.12561	1.45549	0.989142	2.54433	0.71786	0.0159889	0.946667	2.55556	78.0794	1.1816	0.00256108	0.330308	1.75402	2.59306
WT_NT E1 WTNT x40-1 (11)	2.89224	0.126907	0.133277	7.87976	0.223338	3.63838	2.46236	1.75828	0.977043	3.32639	0.76886	0.0138444	0.44	1.71429	58.1378	1.14753	0.00230145	0.42115	2.3361	4.11269
WT_NT E1 WTNT x40-1 (12)	2.67079	0.163761	0.058841	6.10644	0.196104	2.63366	2.02204	1.34265	0.973933	6.45679	0.865894	0.00671111	0.27	4	23.1358	1.03349	0.00100145	0.521079	2.17621	2.28306
WT_NT E1 WTNT x40-1 (13)	3.07018	0.103398	0.0294836	9.67133	0.147253	3.41033	2.60016	1.86608	0.91892	7.2716	0.879104	0.0148889	1.02	2.18182	88.017	1.18689	0.00215265	0.525471	3.42876	6.4132
WT_NT E1 WTNT x40-1 (14)	2.55956	0.186133	0.0945603	5.37249	0.278923	2.46789	3.78359	3.17027	0.869776	1.93382	0.659148	0.00886667	0.526667	5.5	21.3612	1.11987	0.00146411	0.97204	6.6182	15.1164
WT_NT E1 WTNT x40-1 (15)	2.56848	0.184232	0.0940954	5.42793	0.28676	2.56744	2.85931	2.19277	0.883298	3.37766	0.771567	0.00914444	0.351667	1.25	19.7543	1.07461	0.00158941	0.839487	1.35712	7.80703
WT_NT E1 WTNT x40-1 (16)	2.16202	0.294166	0.216045	3.39944	0.46611	1.875	3.76235	2.83984	0.807886	1.71351	0.631474	0.00557778	0.128333	2	11.7382	1.0139	0.000978709	0.522406	5.80196	14.4844
WT_NT E1 WTNT x40-1 (17)	2.78034	0.144357	0.0429513	6.92729	0.135832	2.59328	2.00754	1.38589	1.01575	8.31395	0.892634	0.0089	0.375	8.5	31.8895	1.11634	0.001305	0.474045	1.64827	1.77851
WT_NT E1 WTNT x40-1 (18)	3.0413	0.106894	0.0654252	9.35503	0.126405	3.09091	2.73592	1.80167	0.929304	3.97924	0.799166	0.0159889	1.25167	2.08333	78.2609	1.19698	0.00246908	0.351706	2.03858	2.10369
WT_NT E1 WTNT x40-1 (19)	2.66472	0.164908	0.196598	6.06397	0.255898	3.14079	1.79836	1.21475	1.02388	3.5124	0.778388	0.0182	0.611667	1	66.4165	1.22481	0.00335067	0.233098	1.95065	2.31268
WT_NT E1 WTNT x40-1 (2)	2.69435	0.159378	0.0512106	6.27437	0.308404	2.996	4.0147	3.17327	0.859828	6.66216	0.869489	0.0126	0.748333	1.77778	32.86	1.15554	0.00220335	0.489754	9.85234	15.5971
WT_NT E1 WTNT x40-1 (20)	2.77166	0.145806	0.0550867	6.85841	0.219866	2.94704	3.26764	2.66946	0.916396	5.72889	0.851387	0.0168222	0.835	2.57143	49.6579	1.18094	0.00288932	0.437659	9.15224	9.62269
WT_NT E1 WTNT x40-1 (21)	2.72454	0.153934	0.06634	6.49628	0.269723	3.16872	3.28439	2.62857	0.939206	4.94681	0.831843	0.0124222	0.488333	1.57143	35.2269	1.13764	0.00207624	0.601132	8.6958	8.88719
WT_NT E1 WTNT x40-1 (22)	2.50385	0.198463	0.0623961	5.03871	0.219303	2.16157	2.19964	1.43065	0.916068	6.91753	0.873698	0.00853333	0.161667	6	15.8107	1.06276	0.0014213	0.434514	2.81914	4.25819
WT_NT E1 WTNT x40-1 (23)	2.34757	0.237586	0.869073	4.209	0.402405	2.59135	2.14086	1.23846	0.970544	0.744652	0.42682	0.0145	0.055	4	12.6679	1.16519	0.00304299	0.0276818	2.05318	2.13295
WT_NT E1 WTNT x40-1 (24)	2.71849	0.155011	0.179505	6.45117	0.335719	3.44747	2.50949	1.82125	0.922304	3.35072	0.770153	0.0166778	0.2	1.8	35.2976	1.19977	0.00317105	0.233731	4.28433	4.48995
WT_NT E1 WTNT x40-1 (25)	2.55469	0.18718	0.202921	5.34245	0.371718	3.24096	2.23976	1.6493	0.995008	2.97537	0.748451	0.00896667	0.245	2	22.6639	1.11331	0.00156382	0.268088	2.76471	3.0052
WT_NT E1 WTNT x40-1 (26)	2.85609	0.1323	0.0876479	7.55855	0.195696	3.48905	1.62087	1.09626	1.04347	8.36029	0.893166	0.0141444	0.556667	2.85714	56.2964	1.16328	0.00233921	0.381216	1.2548	1.54257
WT_NT E1 WTNT x40-1 (27)	2.50119	0.199071	0.314901	5.02333	0.272645	2.54651	2.12928	1.60724	0.970857	1.57447	0.61157	0.00672222	0.128333	4	16.8676	1.02378	0.00110342	0.43976	1.41739	1.52436
WT_NT E1 WTNT x40-1 (28)	2.45076	0.210972	0.403405	4.73998	0.424071	3.00781	2.52947	1.55501	0.97444	1.57353	0.611429	0.00583333	0.0783333	1	16.1495	0.997517	0.00097869	0.246885	2.89618	3.39891
WT_NT E1 WTNT x40-1 (29)	2.23215	0.27135	0.687818	3.68527	0.550933	2.53465	2.36183	1.41684	0.926616	1.64828	0.622396	0.00426667	0.005	1.5	9.64017	1.00177	0.000743202	0.183995	1.08723	1.67203
WT_NT E1 WTNT x40-1 (3)	2.60455	0.176738	0.284755	5.65809	0.172932	2.036	2.70852	1.44116	0.865306	1.26761	0.559006	0.00715556	0.128333	8	22.5	1.04328	0.00112399	0.249222	1.41266	1.46739
WT_NT E1 WTNT x40-1 (30)	2.15176	0.297662	0.323606	3.35952	0.385596	1.91489	3.06801	1.99755	0.917912	1.9711	0.663424	0.00571111	0.108333	8	10.2082	1.0252	0.00103048	0.37686	2.57093	4.68043
WT_NT E1 WTNT x40-1 (31)	2.42356	0.217683	0.308222	4.59383	0.307559	2.20455	3.69556	2.60635	0.865326	1.23426	0.552424	0.00985556	0.115	3.5	19.202	1.08792	0.00185773	0.121063	2.06373	7.15036
WT_NT E1 WTNT x40-1 (32)	2.37041	0.231419	0.284174	4.32116	0.367709	2.51462	2.49877	1.63293	0.959666	2.33898	0.700508	0.00875556	0.113333	6	11.5942	1.0583	0.00162761	0.191839	1.96925	3.312
WT_NT E1 WTNT x40-1 (33)	2.47951	0.204103	0.489427	4.89949	0.450048	3.19212	2.42811	1.76553	0.971178	1.48128	0.596983	0.0154667	0.16	3.5	17.3285	1.18241	0.00321244	0.239732	1.49172	3.05687
WT_NT E1 WTNT x40-1 (34)	2.74211	0.150852	0.172089	6.62903	0.245071	3.58577	1.61038	1.24237	1.09266	4.54167	0.819549	0.0147778	0.22	1.4	64.4266	1.15871	0.0024832	0.219363	1.25048	1.40241
WT_NT E1 WTNT x40-1 (36)	2.49625	0.200206	0.696587	4.99485	0.458981	3.20305	2.82617	1.97772	0.946549	0.619898	0.382677	0.0141111	0.158333	3.33333	18.57	1.18731	0.00289348	0.101174	1.50032	4.34142
WT_NT E1 WTNT x40-1 (37)	2.46432	0.207704	0.196223	4.81454	0.477738	2.7783	4.15966	2.93991	0.834892	2.55522	0.718724	0.0132333	0.25	1.2	20.9766	1.1714	0.0025315	0.129586	2.47664	8.41031
WT_NT E1 WTNT x40-1 (38)	2.67387	0.163181	0.165492	6.12818	0.367912	3.87633	2.3162	1.77253	1.04284	3.66179	0.78549	0.0283333	0.526667	1.1	33.2322	1.28265	0.00596748	0.0990148	3.74565	5.24088
WT_NT E1 WTNT x40-1 (39)	2.4262	0.217023	0.147214	4.60781	0.285928	2.34132	2.47032	2.01048	0.950249	3.00699	0.750436	0.00636667	0.16	10	12.393	1.08225	0.00104333	0.213015	1.49856	4.71702
WT_NT E1 WTNT x40-1 (4)	2.59536	0.178619	0.0381844	5.59852	0.219659	2.12014	4.02015	2.73863	0.808011	6.87931	0.873085	0.0101556	0.263333	3.33333	37.9398	1.12106	0.00159699	0.29585	3.26613	10.927
WT_NT E1 WTNT x40-1 (40)	2.97767	0.115019	0.0433875	8.69419	0.186602	4.05366	1.78707	1.41881	1.07935	8.56579	0.895461	0.00807778	0.485	2	54.2919	1.0749	0.00108552	0.482143	3.15214	3.21782
WT_NT E1 WTNT x40-1 (41)	2.89873	0.125963	0.0269312	7.93886	0.159027	2.79379	3.02532	2.31142	0.882471	7.88489	0.887449	0.0137222	0.803333	2.57143	57.4827	1.15353	0.00209929	0.407421	4.37518	8.82788
WT_NT E1 WTNT x40-1 (42)	2.8678	0.130529	0.0906018	7.66113	0.14261	2.79795	2.40168	1.76622	0.967102	3.54774	0.78011	0.0100556	0.398333	3.14286	58.3697	1.10721	0.00151686	0.267999	1.30402	4.5217
WT_NT E1 WTNT x40-1 (43)	2.77936	0.14452	0.105826	6.91948	0.26257	2.97967	3.47997	2.75285	0.840375	2.89956	0.743561	0.00992222	0.228333	1.83333	43.5241	1.146	0.00162028	0.211643	1.27306	9.04313
WT_NT E1 WTNT x40-1 (44)	2.78258	0.143984	0.0342513	6.94522	0.214777	2.55333	3.82415	3.06008	0.793282	6.50388	0.866736	0.0107556	0.766667	1.6	63.0513	1.13534	0.00164491	0.28748	1.50612	19.7139
WT_NT E1 WTNT x40-1 (45)	3.07175	0.103212	0.0367679	9.68883	0.189179	4.15135	2.27348	1.83422	0.985103	8.17431	0.891	0.0222222	1.525	1.61111	70.7211	1.24791	0.00378221	0.502494	5.334	8.7607
WT_NT E1 WTNT x40-1 (47)	2.72307	0.154196	0.39278	6.48527	0.308675	3.33191	2.57022	1.76489	0.924731	1.38193	0.580172	0.0128889	0.358333	3.5	39.4785	1.14241	0.00239915	0.131306	1.78622	3.06906
WT_NT E1 WTNT x40-1 (48)	2.74751	0.149917	0.0854375	6.67036	0.246964	3.02632	2.92101	2.03808	0.912953	3.93191	0.797239	0.0128778	0.578333	2	39.8961	1.15332	0.00218618	0.34381	6.12235	6.86821
WT_NT E1 WTNT x40-1 (49)	2.76007	0.147765	0.193158	6.7675	0.201847	3.04706	1.91427	1.10895	1.00217	3.28163	0.766444	0.0116556	0.248333	1.83333	43.4938	1.15088	0.0019013	0.154377	1.27336	1.31208
WT_NT E1 WTNT x40-1 (5)	2.86507	0.130939	0.11222	7.63712	0.267202	3.94737	2.24071	2.01058	0.999903	3.98846	0.799537	0.0144111	0.681667	2.125	39.3481	1.18298	0.00250035	0.521696	5.39993	6.15973
WT_NT E1 WTNT x40-1 (50)	2.81518	0.13868	0.22917	7.21086	0.26731	3.82573	1.74609	1.29493	1.02617	3.29373	0.767102	0.0144556	0.5	1.85714	38.493	1.17831	0.0025745	0.409345	1.12873	1.82359
WT_NT E1 WTNT x40-1 (51)	2.37521	0.230143	0.765488	4.34512	0.414421	2.66492	1.55554	1.1431	0.952713	1.30867	0.56685	0.0121333	0.0383333	1.25	15.5153	1.13667	0.00243405	0.121046	1.39936	1.5566
WT_NT E1 WTNT x40-1 (52)	2.49936	0.199492	0.14675	5.01274	0.25836	2.40175	2.48109	2.08579	0.942626	2.8629	0.741127	0.0106444	0.293333	2	14.3676	1.08349	0.00200174	0.717366	4.55639	6.2669
WT_NT E1 WTNT x40-1 (53)	2.66741	0.164399	0.172422	6.08277	0.295172	3.445	1.76379	1.49688	1.04244	4.97076	0.832517	0.0113444	0.331667	2	23.3894	1.11193	0.00200506	0.159578	1.64632	2.11593
WT_NT E1 WTNT x40-1 (54)	2.62012	0.173599	0.266249	5.76041	0.295617	2.98295	2.42536	1.447	0.952419	1.69796	0.629349	0.00734444	0.22	1.6	25.0096	1.03089	0.00119804	0.491993	3.12736	3.13164
WT_NT E1 WTNT x40-1 (55)	2.41142	0.220746	0.155618	4.5301	0.364815	2.66667	3.01971	2.42366	0.974597	2.33898	0.700508	0.0109444	0.546667	6	13.9188	1.09475	0.002041	0.698802	6.82816	11.6525
WT_NT E1 WTNT x40-1 (56)	2.40319	0.22285	0.97928	4.48733	0.487616	3.19608	1.4088	1.08455	1.01998	1.27163	0.559788	0.0105	0.045	4	17.0605	1.10494	0.00208883	0.234577	1.19821	1.22713
WT_NT E1 WTNT x40-1 (57)	2.64656	0.168393	0.154492	5.93849	0.270115	3.08571	1.90356	1.40401	0.999782	3.27273	0.765957	0.00731111	0.0816667	2	25.3353	1.05095	0.0011602	0.19878	1.24825	3.90658
WT_NT E1 WTNT x40-1 (58)	2.08696	0.32072	0.41618	3.11799	0.660209	2.36691	3.24666	2.68412	0.934257	1.69301	0.628668	0.00984444	0.0366667	1	4.85458	1.11443	0.00204884	0.100787	7.86808	7.86963
WT_NT E1 WTNT x40-1 (59)	2.6404	0.169591	0.0554359	5.89654	0.267315	2.20082	7.4642	4.91436	0.721898	2.3	0.69697	0.00733333	0.568333	3.5	37.8783	1.03858	0.00106487	0.798673	28.8059	31.0306
WT_NT E1 WTNT x40-1 (6)	2.08051	0.32311	0.491812	3.09493	0.594937	2.45679	2.77452	2.07837	1.02916	1.28472	0.56231	0.00365556	0.02	0	2.61622	0.921801	0.000645944	0.155936	3.41472	5.49182
WT_NT E1 WTNT x40-1 (60)	2.64336	0.169014	0.331344	5.91667	0.316937	3.24528	1.8989	1.24558	0.974292	2.22156	0.689591	0.0119556	0.146667	2	21.058	1.13073	0.00220885	0.221938	1.4395	2.04229
WT_NT E1 WTNT x40-1 (61)	2.4915	0.201304	0.0901505	4.96761	0.213559	1.91342	3.67819	2.24432	0.833497	2.81818	0.738095	0.007	0.14	3.5	23.7097	1.04566	0.00110233	0.0796819	2.71628	6.81079
WT_NT E1 WTNT x40-1 (62)	2.60766	0.176107	0.0967576	5.67838	0.348735	3.11561	2.493	2.16152	0.929117	4.51538	0.818689	0.00796667	0.126667	1.16667	26.1942	1.04671	0.00132167	0.32126	8.49426	8.84467
WT_NT E1 WTNT x40-1 (63)	2.71213	0.15615	0.219448	6.40411	0.213726	2.86149	2.14765	1.3537	0.966504	2.14932	0.682471	0.0154667	0.861667	1.9	61.6463	1.19184	0.00275255	0.24711	1.48289	2.43885
WT_NT E1 WTNT x40-1 (64)	2.51729	0.195416	0.168563	5.11729	0.360388	2.97531	2.59263	1.72898	0.968517	3.58442	0.78187	0.00784444	0.236667	2.66667	16.3496	1.0906	0.00137084	0.595069	2.00994	4.79133
WT_NT E1 WTNT x40-1 (65)	2.52168	0.19443	0.107159	5.14324	0.183357	1.77994	3.84029	2.52204	0.8082	1.92605	0.658242	0.0101111	0.296667	2.25	27.3523	1.08281	0.00173038	0.501646	3.18694	12.0463
WT_NT E1 WTNT x40-1 (66)	2.6543	0.166899	0.150873	5.99164	0.293507	3.03865	2.86529	2.4404	0.936106	2.48016	0.712657	0.00974444	0.443333	1.25	38.9376	1.10551	0.00165339	0.438979	5.41739	5.6893
WT_NT E1 WTNT x40-1 (67)	2.92795	0.121795	0.138255	8.21053	0.169988	3.72424	1.91314	1.54358	1.10017	3.31719	0.768368	0.0198111	0.8	3.5	59.2883	1.22489	0.00333196	0.614829	1.16984	1.87327
WT_NT E1 WTNT x40-1 (68)	2.71394	0.155824	0.228262	6.4175	0.261755	3.58049	1.84324	1.44626	1.09051	2.39088	0.705091	0.0115667	0.403333	8	31.064	1.12093	0.00200659	0.319101	1.1426	2.29791
WT_NT E1 WTNT x40-1 (69)	2.56255	0.185495	0.131995	5.39098	0.371602	3.2766	2.29061	2.04607	0.997047	4.30102	0.811357	0.0115444	0.421667	1.25	24.2574	1.10954	0.00212133	0.511654	5.58058	5.59973
WT_NT E1 WTNT x40-1 (7)	2.28168	0.256309	0.728468	3.90155	0.504058	2.6371	2.58272	1.50431	0.952026	0.882155	0.468694	0.00621111	0.0216667	6	8.79389	1.034	0.00112818	0.13375	1.23904	2.1883
WT_NT E1 WTNT x40-1 (70)	2.58116	0.181563	0.11619	5.50774	0.34255	3.09816	3.0894	1.99782	0.9611	4.10687	0.804185	0.00743333	0.25	1.6	22.9015	1.04777	0.00123551	0.634108	5.73833	6.05899
WT_NT E1 WTNT x40-1 (71)	2.19074	0.284598	1.0291	3.51372	0.543603	2.56338	2.37143	1.7386	0.989475	0.599251	0.374707	0.00948889	0.025	1.5	14.0281	1.10625	0.00193857	0.0765167	2.94204	3.08642
WT_NT E1 WTNT x40-1 (72)	2.75583	0.148487	0.112167	6.73458	0.165752	2.56747	2.67966	1.53182	0.936412	2.30822	0.697723	0.0107333	0.803333	0	30.3398	1.10106	0.00177777	0.335911	2.36365	2.60102
WT_NT E1 WTNT x40-1 (73)	2.31866	0.245625	0.113812	4.07125	0.412333	1.76166	7.27311	5.55166	0.673861	1.42358	0.587387	0.00616667	0.258333	0	11.7914	1.02508	0.00101354	0.212238	10.28	40.3866
WT_NT E1 WTNT x40-1 (74)	2.69662	0.158962	0.0722772	6.29081	0.177438	2.37121	2.63933	1.87609	0.894832	3.19149	0.761421	0.00875556	0.463333	2.5	29.9267	1.08941	0.0013809	1.02816	2.17303	5.94248
WT_NT E1 WTNT x40-1 (75)	2.87829	0.128961	0.0692977	7.75425	0.25479	3.59615	2.61669	2.34251	0.918771	5.25405	0.840104	0.0128556	0.565	2.5	44.5103	1.14188	0.00207134	0.354011	1.54114	5.55435
WT_NT E1 WTNT x40-1 (76)	2.76643	0.146687	0.103504	6.81723	0.330217	3.55682	2.75142	2.27491	0.907934	4.20155	0.80775	0.00745556	0.235	2.75	34.1255	1.08348	0.00111279	0.540464	1.61291	6.71821
WT_NT E1 WTNT x40-1 (77)	2.6371	0.170237	0.0756191	5.87415	0.331519	2.57078	5.69929	3.74327	0.76009	3.3	0.767442	0.00812222	0.258333	4	22.7611	1.06634	0.00131111	0.79413	10.0054	20.1255
WT_NT E1 WTNT x40-1 (78)	2.78432	0.143696	0.222763	6.95914	0.280326	3.58159	2.25589	1.6462	0.97205	2.67073	0.727575	0.0133778	0.28	2.25	34.96	1.14462	0.00241482	0.337324	3.17831	3.75134
WT_NT E1 WTNT x40-1 (79)	2.35571	0.23537	0.250235	4.24864	0.374709	2.45185	2.48308	1.74263	0.942752	2.03774	0.670807	0.00536667	0.095	1.5	17.3611	1.00787	0.000910263	0.412034	2.12225	5.15357
WT_NT E1 WTNT x40-1 (8)	2.8845	0.128043	0.0596095	7.8099	0.115858	2.69231	1.89215	1.52707	1.01278	3.74621	0.789306	0.0139222	1.40667	2.57143	62.1881	1.16321	0.0021414	0.750632	2.66134	2.67491
WT_NT E1 WTNT x40-1 (80)	2.08551	0.321257	0.705107	3.11278	0.56982	2.33846	2.31518	1.71356	0.995208	0.85122	0.459816	0.00843333	0.0116667	1.5	5.80229	1.07546	0.00173477	0.22079	2.04448	4.71574
WT_NT E1 WTNT x40-1 (81)	2.52401	0.19391	0.35336	5.15703	0.367769	2.97917	2.54884	1.91612	0.952594	1.73464	0.634321	0.0108778	0.095	3.5	19.8406	1.10877	0.00203079	0.162965	2.91627	3.90139
WT_NT E1 WTNT x40-1 (82)	2.58434	0.180898	0.0885297	5.52798	0.146354	2.0035	3.05122	1.832	0.94737	4.55195	0.819883	0.0095	0.426667	2.75	28.7646	1.12316	0.00157962	0.95819	1.00998	6.85212
WT_NT E1 WTNT x40-1 (83)	2.65639	0.166499	0.215505	6.00605	0.290615	3.0582	1.86754	1.35295	0.944534	2.7602	0.734057	0.00818889	0.15	3.5	21.9612	1.07284	0.00134824	0.429572	2.01177	2.34511
WT_NT E1 WTNT x40-1 (84)	1.83272	0.429779	1.41782	2.32678	0.853821	2.42857	1.78513	1.56956	1.12957	0.668831	0.400778	0.00571111	0.005	0	1.40291	1.03395	0.00117684	0.0623783	2.44802	2.49211
WT_NT E1 WTNT x40-1 (85)	2.58173	0.181442	0.214126	5.5114	0.241721	2.48182	2.65178	1.74122	0.915906	2.03891	0.670935	0.00867778	0.361667	10	16.8626	1.05746	0.00150382	0.22631	1.92013	4.02272
WT_NT E1 WTNT x40-1 (86)	2.96784	0.116328	0.11635	8.59635	0.220068	3.88	2.83193	1.80668	0.962141	3.49084	0.777325	0.0136222	0.433333	3.75	51.7146	1.17195	0.00218796	0.291254	2.43889	2.55895
WT_NT E1 WTNT x40-1 (87)	2.20368	0.280393	0.28402	3.56643	0.603109	2.19424	5.54031	3.56024	0.792235	1.50862	0.601375	0.00646667	0.0983333	0	8.33143	1.00983	0.00117642	0.117242	12.4621	13.9736
WT_NT E1 WTNT x40-1 (88)	2.21416	0.277029	0.614745	3.60973	0.507208	2.65672	1.75857	1.16508	1.03342	2	0.666667	0.0086	0.0183333	3	11.4903	1.08858	0.00173797	0.101666	1.27552	2.16077
WT_NT E1 WTNT x40-1 (89)	2.69414	0.159418	0.188741	6.27282	0.255326	3.1658	2.43225	1.77436	0.998788	4	0.8	0.00838889	0.07	2.5	41.3311	1.0857	0.0013898	0.0363937	1.41501	2.08894
WT_NT E1 WTNT x40-1 (9)	2.93506	0.120802	0.162374	8.27799	0.246174	3.68506	2.42096	1.76058	0.89722	3.37427	0.77139	0.0166222	0.673333	2.5	56.7903	1.19428	0.0028717	0.131832	2.12207	2.83258
WT_NT E1 WTNT x40-1 (90)	2.46586	0.207337	0.318448	4.82307	0.354671	2.82667	2.20989	1.86374	0.984098	1.42126	0.586992	0.00683333	0.105	6	13.964	1.06313	0.0011624	0.14539	3.34391	4.86711
WT_NT E1 WTNT x40-1 (91)	2.48195	0.20353	0.163862	4.91328	0.271412	2.45581	2.38409	1.54812	0.959423	2.46792	0.711643	0.0102111	0.378333	2.25	20.5749	1.10676	0.00177275	0.350656	3.74685	4.72689
WT_NT E1 WTNT x40-1 (92)	2.70024	0.158302	0.170148	6.31705	0.251505	2.86818	2.32073	1.2917	0.905356	2.67593	0.72796	0.00882222	0.225	5	26.6021	1.07718	0.00147693	0.462716	3.0096	3.48115
WT_NT E1 WTNT x40-1 (93)	2.11616	0.310115	0.334047	3.22461	0.398034	2.03226	2.45634	1.57533	0.998944	1.44221	0.590535	0.0054	0.0266667	0	4.02787	0.996526	0.000922677	0.163551	1.44096	2.37306
WT_NT E1 WTNT x40-1 (94)	2.69461	0.15933	0.171078	6.27628	0.281654	3.31818	2.10802	1.73833	0.996186	2.40625	0.706422	0.00968889	0.208333	1.57143	48.026	1.10321	0.00163355	0.107088	1.02257	7.59886
WT_NT E1 WTNT x40-1 (95)	2.3213	0.244881	0.354316	4.08362	0.393995	2.35359	2.87004	2.18261	0.918206	1.53216	0.605081	0.00962222	0.0383333	0	8.56679	1.12003	0.00181214	0.107459	3.17622	4.33385
WT_NT E1 WTNT x40-1 (96)	2.57651	0.182537	0.194769	5.47834	0.31856	3.02747	2.07409	1.50252	0.979121	2.72685	0.731677	0.00894444	0.213333	3	30.0323	1.08878	0.00149287	0.479389	1.73441	2.47349
WT_NT E1 WTNT x40-1 (97)	2.41555	0.219701	0.369971	4.55164	0.438739	2.87273	2.68214	2.05351	0.952847	1.31989	0.568946	0.00958889	0.05	2	19.5601	1.08861	0.00179312	0.20706	1.01389	6.83916
WT_NT E1 WTNT x40-1 (99)	2.73535	0.152031	0.139528	6.57761	0.277427	3.61712	2.22625	1.65406	1.04405	3.65098	0.784992	0.0131778	0.463333	1.09091	45.5811	1.15324	0.00239781	0.533846	4.66206	5.21038
WT_NT E4 WT NTx40-9 (1)	2.30115	0.250627	0.228063	3.98999	0.460256	2.21637	4.01952	2.68598	0.818787	1.9187	0.657382	0.00797778	0.113333	4	9.51059	1.0497	0.00144698	0.190294	3.16882	7.59693
WT_NT E4 WT NTx40-9 (10)	2.78211	0.144062	0.0860153	6.94145	0.197056	2.65278	3.38383	2.49528	0.860906	2.81028	0.737552	0.0107111	0.421667	6.5	29.571	1.1283	0.00172226	0.360095	3.15863	6.5042
WT_NT E4 WT NTx40-9 (11)	2.53252	0.192019	0.078185	5.20782	0.268542	2.56364	2.66816	2.03888	0.949936	3.06977	0.754286	0.00583333	0.18	6	14.2045	1.03243	0.000890697	1.14559	5.49619	12.3119
WT_NT E4 WT NTx40-9 (12)	2.68466	0.161166	0.106089	6.20479	0.157434	2.51406	1.70735	1.43487	1.02117	2.34711	0.701235	0.009	0.466667	12	19.4102	1.10774	0.00146508	0.747011	3.22078	3.24527
WT_NT E4 WT NTx40-9 (13)	1.89165	0.401588	1.01706	2.49012	0.67033	1.78899	3.11835	2.39966	0.877494	0.465465	0.317623	0.00542222	0.005	0	5.42581	1.0459	0.00105091	0.101222	1.76443	3.86993
WT_NT E4 WT NTx40-9 (14)	2.57923	0.181967	0.207262	5.49551	0.257743	2.76613	2.21762	1.31439	0.99145	2.57349	0.720161	0.0137778	0.226667	1.6	25.8723	1.1663	0.00261299	0.505614	1.74639	1.76805
WT_NT E4 WT NTx40-9 (15)	2.2535	0.26476	0.49115	3.777	0.510903	2.76316	1.90998	1.63359	1.0235	1.47859	0.596545	0.0109333	0.166667	1.5	7.64736	1.13096	0.00225583	0.31397	2.48508	4.68581
WT_NT E4 WT NTx40-9 (16)	2.14766	0.299071	0.343338	3.34369	0.590078	2.15385	4.23889	2.65019	0.838559	1.16268	0.537611	0.00502222	0.03	0	6.58436	1.03056	0.000878788	0.472706	2.19286	10.0832
WT_NT E4 WT NTx40-9 (17)	2.75661	0.148355	0.0670243	6.7406	0.196257	2.66561	2.50405	1.42172	0.892657	5.04433	0.834556	0.0136333	0.323333	2.8	40.6406	1.14527	0.00223083	0.191507	2.40706	2.77656
WT_NT E4 WT NTx40-9 (18)	2.61884	0.173853	0.114821	5.75198	0.229396	2.2913	4.5831	2.74249	0.831712	2.4433	0.709581	0.00742222	0.226667	8	25.5274	1.04525	0.00117373	0.356715	4.93974	6.1036
WT_NT E4 WT NTx40-9 (19)	2.71961	0.15481	0.033083	6.45954	0.185739	2.44538	4.34215	3.789	0.878401	3.25	0.764706	0.00717778	0.456667	5.5	22.3178	1.04403	0.00105355	0.897192	16.5413	16.6922
WT_NT E4 WT NTx40-9 (2)	2.33152	0.242017	0.446439	4.13194	0.388579	2.47143	1.98356	1.16691	0.95952	2.18857	0.68638	0.0062	0.0583333	6	2.67363	1.0335	0.00109923	0.322401	1.11388	1.13685
WT_NT E4 WT NTx40-9 (20)	2.79696	0.14162	0.146636	7.06117	0.17051	2.8231	1.98322	1.44565	0.968222	2.85771	0.740779	0.0108444	0.476667	4	38.574	1.13116	0.00171817	0.729923	1.20573	2.08625
WT_NT E4 WT NTx40-9 (21)	3.00139	0.11192	0.0771307	8.93495	0.131867	2.96477	1.98839	1.78236	0.913757	3.05782	0.753562	0.0132556	0.501667	6.75	53.3493	1.15826	0.00198332	0.313165	1.15478	4.08723
WT_NT E4 WT NTx40-9 (22)	2.80256	0.14071	0.130931	7.10682	0.210008	3.54545	1.59628	1.21898	1.08863	3.32	0.768519	0.018	0.48	1.7	51.8201	1.20113	0.00317985	0.373505	2.64878	3.40967
WT_NT E4 WT NTx40-9 (23)	2.76224	0.147396	0.223282	6.78444	0.193917	2.94946	1.95448	1.32335	0.987234	2.17033	0.684575	0.0128222	0.191667	3.5	28.1025	1.1442	0.00222406	0.106137	1.53993	1.53994
WT_NT E4 WT NTx40-9 (24)	2.69178	0.15985	0.0907979	6.25585	0.256577	2.52174	5.12983	4.18142	0.795802	1.77465	0.639594	0.0109444	0.92	6.5	34.3	1.12406	0.00184045	0.716024	17.067	25.1383
WT_NT E4 WT NTx40-9 (25)	2.34272	0.238917	0.245906	4.18556	0.326626	2.10753	2.86716	2.51222	0.881037	1.65399	0.623209	0.00775556	0.285	8	9.12414	1.07903	0.00144715	0.203831	2.22409	5.99513
WT_NT E4 WT NTx40-9 (26)	2.90825	0.124589	0.0765528	8.0264	0.181737	3.53381	1.72187	1.38587	1.03276	5.09	0.835796	0.0135333	0.705	3.83333	35.4617	1.1606	0.00210313	0.373595	1.37325	2.37135
WT_NT E4 WT NTx40-9 (27)	2.13193	0.304537	0.222086	3.28367	0.556533	2.37864	4.31726	3.46002	0.971011	1.6213	0.61851	0.00492222	0.125	2	3.73723	0.982832	0.000854529	0.438034	22.0577	22.0598
WT_NT E4 WT NTx40-9 (28)	2.20984	0.278411	0.722756	3.59182	0.554154	2.9	2.00027	1.54841	1.0846	1.06925	0.516734	0.0083	0.085	2	9.6399	1.12866	0.0016117	0.331319	1.21935	2.14854
WT_NT E4 WT NTx40-9 (29)	2.62191	0.173241	0.12106	5.7723	0.236453	2.79295	1.74131	1.18129	0.995044	4.16129	0.80625	0.0106667	0.503333	2	29.4587	1.14275	0.0017455	0.866025	1.03901	2.01882
WT_NT E4 WT NTx40-9 (3)	2.75462	0.148695	0.106241	6.72518	0.22276	2.88235	3.58035	2.44569	0.90808	2.94286	0.746377	0.0092	0.275	4	37.8786	1.11016	0.00144474	0.419915	5.10799	7.66053
WT_NT E4 WT NTx40-9 (30)	2.45454	0.210056	0.137953	4.76064	0.159936	1.69231	3.37183	1.96078	0.888875	3.36408	0.770857	0.00998889	0.118333	2.5	12.7504	1.10301	0.00186355	0.0943333	1.00417	2.37302
WT_NT E4 WT NTx40-9 (31)	2.82615	0.13694	0.0636113	7.30244	0.169317	2.93993	2.54873	1.75256	0.978406	4.61413	0.821878	0.0114778	1.14667	3.75	40.3121	1.13541	0.00174389	0.895833	1.36471	2.52321
WT_NT E4 WT NTx40-9 (32)	2.86595	0.130806	0.0880003	7.64489	0.247287	3.37261	2.88217	2.47891	0.887143	3.64134	0.784545	0.0169667	0.693333	1.3	43.7738	1.21262	0.00301294	0.372605	1.30382	12.6682
WT_NT E4 WT NTx40-9 (33)	2.42091	0.218348	0.471292	4.57984	0.453014	3.2193	1.91591	1.43088	1.04437	1.93678	0.659491	0.00567778	0.0116667	1.5	14.1276	1.02084	0.000971363	0.312806	1.83055	2.23883
WT_NT E4 WT NTx40-9 (34)	2.44108	0.213337	0.1815	4.68742	0.479518	3.05263	3.98024	3.2671	0.940455	2.43103	0.708543	0.00663333	0.146667	2	20.8889	1.01461	0.0011627	0.147565	11.1529	11.4194
WT_NT E4 WT NTx40-9 (35)	2.68332	0.161416	0.16178	6.19516	0.305973	3.32955	2.45011	1.74459	0.971607	4.1223	0.804775	0.00791111	0.168333	3.5	24.7138	1.09938	0.00122581	0.353553	1.4829	1.70157
WT_NT E4 WT NTx40-9 (36)	2.81716	0.138365	0.0487904	7.22725	0.0984237	2.04611	2.98949	2.32713	0.902415	2.22689	0.690104	0.00853333	0.396667	9.5	26.7189	1.09096	0.00125578	0.581843	5.44825	7.54577
WT_NT E4 WT NTx40-9 (37)	2.62841	0.171949	0.0427328	5.81569	0.254571	2.2351	4.63962	3.96668	0.761712	5.38095	0.843284	0.0119111	0.62	2.75	37.0454	1.1657	0.00197129	0.386334	1.55392	25.768
WT_NT E4 WT NTx40-9 (38)	2.78311	0.143896	0.0588199	6.94946	0.174839	2.47315	3.78518	2.53354	0.851101	4.52469	0.818994	0.00994444	0.566667	2.28571	51.3452	1.11062	0.00153831	0.170441	2.70362	8.26232
WT_NT E4 WT NTx40-9 (39)	2.59963	0.177742	0.515437	5.62614	0.354497	3.33163	1.95946	1.30068	0.99458	1.52235	0.603545	0.0119111	0.06	3.33333	17.6955	1.15315	0.0022005	0.244339	1.42262	1.4253
WT_NT E4 WT NTx40-9 (4)	2.45634	0.209622	0.0831344	4.7705	0.25427	2.3253	2.93739	2.25874	0.966647	2.91729	0.744722	0.00578889	0.186667	4	6.4433	1.02114	0.000932718	0.837004	2.77608	6.85453
WT_NT E4 WT NTx40-9 (40)	2.39412	0.225189	0.568276	4.44071	0.36633	2.85405	1.94739	1.43242	1.06187	1.17181	0.539556	0.0125	0.108333	4.5	14.2488	1.13124	0.00254088	0.0298142	2.69083	2.84211
WT_NT E4 WT NTx40-9 (41)	2.48181	0.203563	0.0600455	4.9125	0.226691	2.39899	2.79067	2.33059	1.02567	4.90476	0.830645	0.00826667	0.508333	2.66667	19.9369	1.06642	0.00133756	0.559618	15.4279	16.7758
WT_NT E4 WT NTx40-9 (42)	2.42457	0.21743	0.0387337	4.59918	0.22532	1.76585	4.22145	3.66811	0.808863	3.32456	0.768763	0.00547778	0.58	0	20.4327	0.99862	0.000785174	1.20849	18.3072	32.8683
WT_NT E4 WT NTx40-9 (43)	2.62494	0.172637	0.170738	5.79251	0.286253	3	2.54962	1.64063	0.96801	2.87415	0.741879	0.0126556	0.156667	2.14286	42.2734	1.15373	0.00218359	0.0838075	4.4009	4.44128
WT_NT E4 WT NTx40-9 (44)	2.77587	0.145101	0.0697112	6.89174	0.212396	2.83142	2.96045	2.12844	0.891461	4.6135	0.821858	0.0101667	0.408333	2.25	37.0864	1.11142	0.00163784	0.033059	1.78648	7.34204
WT_NT E4 WT NTx40-9 (45)	2.64369	0.168952	0.068107	5.91885	0.245532	2.4466	4.6826	2.77711	0.834203	2.95205	0.746967	0.00641111	0.195	5	29.6265	1.03855	0.000958231	0.224187	9.04984	11.5389
WT_NT E4 WT NTx40-9 (46)	2.71088	0.156374	0.0696126	6.39493	0.151111	2.46032	2.07844	1.64466	0.989708	3.50602	0.778075	0.00831111	0.443333	10	26.4192	1.06096	0.00126964	0.589571	1.70725	3.1601
WT_NT E4 WT NTx40-9 (47)	2.95022	0.118712	0.0460747	8.42373	0.117812	2.87537	2.29356	1.47713	0.994478	4.31818	0.811966	0.0117	1.09167	4.66667	69.6327	1.12854	0.00164089	0.650079	1.19509	1.91369
WT_NT E4 WT NTx40-9 (48)	2.79725	0.141573	0.248908	7.06352	0.165613	2.65909	1.52938	1.02112	0.925049	2.2887	0.695929	0.00873333	0.201667	2.75	41.6837	1.07579	0.0013656	0.178344	1.07035	1.17149
WT_NT E4 WT NTx40-9 (49)	2.77016	0.146057	0.0440142	6.84664	0.168578	2.41912	3.39047	2.08851	0.860556	4.36496	0.813605	0.00816667	0.398333	8	35.1589	1.08608	0.00117534	0.304166	6.31528	6.31534
WT_NT E4 WT NTx40-9 (5)	2.41002	0.221103	0.0566544	4.52278	0.276631	1.87783	4.24941	3.30929	0.789405	3.85507	0.79403	0.00744444	0.331667	2.75	12.0301	1.06649	0.00120149	0.553146	1.24212	15.1289
WT_NT E4 WT NTx40-9 (50)	2.87084	0.130073	0.0653434	7.68799	0.146277	2.76176	2.7676	1.73492	0.939258	3.86047	0.794258	0.0116111	0.511667	6	35.2301	1.12242	0.00178017	0.309344	1.47635	3.14999
WT_NT E4 WT NTx40-9 (51)	2.62729	0.172171	0.144289	5.80818	0.219206	2.66667	3.02867	2.39059	0.980624	2.20588	0.688073	0.00968889	0.346667	3.33333	25.215	1.08352	0.00166027	0.273022	4.22842	4.28759
WT_NT E4 WT NTx40-9 (52)	2.58537	0.180684	0.224948	5.53453	0.263502	2.87302	2.09221	1.31673	1.01127	2.23207	0.690601	0.00851111	0.163333	2	20.8412	1.07365	0.0014534	0.36847	1.96693	2.0095
WT_NT E4 WT NTx40-9 (53)	2.77269	0.145633	0.119091	6.86657	0.17862	2.95149	1.7912	1.11935	1.01704	3.63158	0.784091	0.0117333	0.61	3.25	40.4457	1.14049	0.00177442	0.591928	1.01974	1.2834
WT_NT E4 WT NTx40-9 (54)	2.45828	0.209152	0.335531	4.78121	0.405742	3.17273	2.06536	1.51296	1.04177	2.33858	0.700472	0.00471111	0.00833333	2	13.7912	0.956743	0.000763965	0.153574	1.36995	2.8418
WT_NT E4 WT NTx40-9 (55)	2.63088	0.171462	0.129922	5.83221	0.184065	2.52074	1.65715	1.32077	1.00741	2.7037	0.73	0.00777778	0.291667	5	26.3327	1.03996	0.00122196	0.473588	2.3624	2.43365
WT_NT E4 WT NTx40-9 (56)	2.32554	0.243689	0.0800884	4.10358	0.28562	1.72571	4.64908	3.5391	0.786885	2.10072	0.677494	0.00478889	0.0866667	0	15.3733	1.00094	0.000724767	0.474403	1.0713	16.9549
WT_NT E4 WT NTx40-9 (57)	2.78676	0.143292	0.0426087	6.97874	0.148481	2.47368	3.98482	2.73555	0.91988	4.25	0.809524	0.0102667	0.566667	8.5	32.5348	1.11092	0.00155109	0.478996	8.00614	8.5481
WT_NT E4 WT NTx40-9 (58)	2.74689	0.150023	0.0604661	6.66564	0.192115	2.54753	3.37806	2.07067	0.871961	4.12102	0.804726	0.00893333	0.465	4	28.1685	1.09584	0.00139251	0.141069	6.97654	9.86778
WT_NT E4 WT NTx40-9 (59)	2.47195	0.205888	0.129181	4.85702	0.261867	2.59064	2.12457	1.61899	1.04231	2.7191	0.731118	0.00735556	0.338333	3.5	33.8512	1.05154	0.00115113	0.69959	1.25107	6.05851
WT_NT E4 WT NTx40-9 (6)	2.60849	0.175937	0.141249	5.68384	0.399089	3.52332	1.86289	1.50428	0.981239	5.86145	0.854258	0.0126556	0.361667	1.625	19.8571	1.14768	0.00237189	0.682144	1.12858	3.01876
WT_NT E4 WT NTx40-9 (60)	2.70089	0.158183	0.245552	6.32179	0.280556	3.33333	1.7384	1.27824	0.995471	3.4717	0.776371	0.0105333	0.258333	1.5	46	1.12606	0.00175417	0.117103	1.38375	1.53166
WT_NT E4 WT NTx40-9 (61)	2.37577	0.229995	0.616381	4.34792	0.44795	2.72772	2.37053	1.39037	0.937356	1.25397	0.556338	0.0142	0.0333333	2	15.2124	1.16056	0.00296438	0.118678	2.45464	2.45563
WT_NT E4 WT NTx40-9 (62)	2.86207	0.131393	0.200788	7.61076	0.224345	3.35484	2.21126	1.29201	0.930647	3.17105	0.760252	0.0105667	0.37	2.8	41.3956	1.12523	0.00167606	0.412731	1.15183	1.19444
WT_NT E4 WT NTx40-9 (63)	2.95862	0.117569	0.077738	8.50565	0.248709	4.14921	2.06429	1.57751	0.978164	6.42688	0.865354	0.0208778	0.535	1.91667	48.5615	1.2329	0.00357588	0.48665	1.3199	3.01313
WT_NT E4 WT NTx40-9 (64)	2.4139	0.220118	0.0745683	4.54303	0.310345	2.10156	4.34884	3.63334	0.830376	3.05818	0.753584	0.0124	0.591667	1.33333	22.3175	1.1151	0.0022771	0.939477	19.1847	29.6024
WT_NT E4 WT NTx40-9 (65)	2.89839	0.126011	0.0958826	7.93579	0.162548	2.93808	2.59607	1.66196	0.918295	3.78151	0.790861	0.0126444	0.488333	4	25.6711	1.14501	0.00198571	0.31927	2.07277	2.49317
WT_NT E4 WT NTx40-9 (66)	2.9062	0.124883	0.0993667	8.00751	0.146428	3.19932	1.68288	1.23901	1.04412	4.59296	0.821204	0.0123667	0.38	2.375	49.1729	1.13077	0.0019001	0.379151	1.13959	1.47209
WT_NT E4 WT NTx40-9 (67)	2.49515	0.200461	0.0752794	4.9885	0.347934	2.51131	4.03056	3.21174	0.853459	4.32432	0.812183	0.0109444	0.226667	1.5	26.2812	1.12291	0.00194357	0.414214	12.3796	18.3047
WT_NT E4 WT NTx40-9 (68)	2.46322	0.207967	0.101711	4.80845	0.191594	2.07054	2.62895	1.84245	0.983756	2.79204	0.736289	0.00952222	0.28	0	23.9762	1.09139	0.00155524	0.649926	2.37772	6.13471
WT_NT E4 WT NTx40-9 (69)	2.44128	0.213288	0.319289	4.68849	0.302326	2.42949	1.94651	1.46482	0.94242	2.11377	0.678846	0.00577778	0.0533333	8	10.5411	1.02947	0.000918521	0.333974	1.34295	1.44169
WT_NT E4 WT NTx40-9 (7)	2.57368	0.183132	0.286281	5.46055	0.266485	2.80829	2.14379	1.83305	0.996251	1.2924	0.563776	0.00871111	0.19	3.5	20.4186	1.09162	0.00155901	0.208248	4.35793	4.455
WT_NT E4 WT NTx40-9 (70)	2.49832	0.199731	0.325868	5.00674	0.401418	3.21014	2.03917	1.2769	1.01198	2.22798	0.690209	0.00692222	0.156667	2	18.4209	1.03309	0.00116232	0.611553	2.18012	2.18019
WT_NT E4 WT NTx40-9 (71)	2.75566	0.148516	0.0502401	6.73328	0.159928	2.49259	2.77093	1.93465	0.925685	2.69767	0.72956	0.00883333	0.948333	3.75	29.5879	1.07774	0.00138054	1.25793	9.36389	9.96429
WT_NT E4 WT NTx40-9 (72)	2.71978	0.15478	0.163679	6.46079	0.333043	3.38865	2.59182	2.40861	0.908846	1.63303	0.620209	0.0127556	0.476667	1.3	42.0351	1.14692	0.00216376	0.805577	2.24498	12.2535
WT_NT E4 WT NTx40-9 (73)	2.42023	0.218519	0.305603	4.57627	0.33806	2.49153	1.93583	1.37567	0.93639	2.21304	0.688769	0.00821111	0.01	3	10.4695	1.06358	0.00144001	0.0822551	2.26187	2.69315
WT_NT E4 WT NTx40-9 (74)	2.65435	0.166889	0.1924	5.992	0.146345	2.48638	1.6291	1.09965	1.08469	3.43627	0.774586	0.0100556	0.195	4.5	19.8631	1.11319	0.00170383	0.41117	1.0568	1.13974
WT_NT E4 WT NTx40-9 (75)	2.72722	0.153459	0.0824349	6.51639	0.198675	2.73913	3.54534	2.81894	0.943047	2.58566	0.721111	0.01	0.51	4.5	21.8197	1.10294	0.0015834	0.551765	7.21673	8.10558
WT_NT E4 WT NTx40-9 (76)	2.25411	0.264576	0.697051	3.77964	0.419495	2.64968	1.75472	1.31648	1.08238	0.991736	0.497925	0.0107111	0.0716667	5	11.7188	1.11128	0.00217293	0.2037	1.75522	2.74331
WT_NT E4 WT NTx40-9 (77)	2.32625	0.243489	0.318447	4.10696	0.291648	2.18605	2.32011	1.44022	0.98562	2.19139	0.686657	0.00741111	0.0766667	0	4.22707	1.04152	0.00134294	0.478942	1.06654	1.12545
WT_NT E4 WT NTx40-9 (78)	2.82367	0.137332	0.118618	7.28163	0.18813	2.92754	2.17749	1.49612	0.926925	3.4121	0.773351	0.0170111	1.10667	4.25	51.5279	1.2209	0.00289095	0.171443	1.82243	2.66183
WT_NT E4 WT NTx40-9 (79)	2.15905	0.295174	0.28447	3.38783	0.242964	1.55346	3.20904	2.03266	0.930266	1.0534	0.513002	0.0047	0.0233333	0	3.87558	1.00577	0.000804572	0.243108	2.22666	3.40287
WT_NT E4 WT NTx40-9 (8)	2.63839	0.169985	0.105879	5.88287	0.179287	2.29434	2.59778	1.97503	0.921073	2.86364	0.741176	0.00944444	0.355	7.5	28.0778	1.08068	0.001514	0.145521	1.19233	5.45821
WT_NT E4 WT NTx40-9 (80)	2.58497	0.180768	0.0942654	5.53196	0.190072	2.26641	2.77165	1.67398	0.939723	3.16744	0.760045	0.00995556	0.531667	10	18.0925	1.11569	0.00170742	0.493258	1.99577	2.5608
WT_NT E4 WT NTx40-9 (81)	2.47207	0.20586	0.109285	4.85768	0.310127	2.24887	3.465	2.61145	0.831315	2.89252	0.743097	0.00925556	0.118333	6	17.4733	1.06388	0.00156866	0.142857	7.708	11.189
WT_NT E4 WT NTx40-9 (82)	1.95661	0.372648	0.756808	2.6835	0.798193	2.25773	2.72358	2.32653	0.94171	0.749175	0.428302	0.00588889	0.00666667	0	0.15859	1.05496	0.00116496	0.221487	1.38406	6.41909
WT_NT E4 WT NTx40-9 (83)	2.68233	0.1616	0.16344	6.18813	0.306664	3.30579	2.409	1.56751	0.964682	4.54167	0.819549	0.0147778	0.423333	2.25	27.7761	1.17277	0.00271817	0.275572	1.04862	1.6492
WT_NT E4 WT NTx40-9 (84)	2.37532	0.230115	0.25579	4.34564	0.391564	2.73099	2.63208	1.85332	1.0043	2.11525	0.678999	0.0102111	0.223333	1.5	13.5641	1.10192	0.00193132	0.376109	4.02735	4.14455
WT_NT E4 WT NTx40-9 (85)	2.49884	0.199611	0.121382	5.00973	0.348934	2.58084	3.53674	2.65861	0.872117	2.54819	0.718166	0.00654444	0.0783333	2	26.5626	1.0615	0.00105888	0.619436	1.75984	13.1464
WT_NT E4 WT NTx40-9 (9)	1.94207	0.378941	0.947659	2.63893	0.737069	2.27632	2.5771	2.04922	1.00473	0.628571	0.385965	0.0038	0.01	0	4.73485	0.962537	0.000690184	0.162221	1.48347	4.79809
WT_NT WT 2 non traité x40_DSP (1)	2.15615	0.296163	0.418812	3.37652	0.544304	2.49438	3.15536	2.37703	1.00132	0.869565	0.465116	0.00382222	0.08	0	5.625	0.927763	0.000643793	0.304997	6.80962	7.60257
WT_NT WT 2 non traité x40_DSP (10)	1.93358	0.382662	0.751354	2.61327	0.657548	2.0885	2.47337	1.86765	0.985565	0.828169	0.453005	0.00721111	0.0816667	2	4.40816	1.04369	0.00145643	0.277564	1.53162	4.33034
WT_NT WT 2 non traité x40_DSP (11)	2.43896	0.213857	0.0620667	4.67603	0.267947	2.24599	3.13404	2.01057	0.927912	6.37931	0.864486	0.00713333	0.503333	2.66667	13.6378	1.06142	0.0011967	1.02386	5.43712	5.72255
WT_NT WT 2 non traité x40_DSP (12)	2.38149	0.228485	0.234554	4.37665	0.379664	2.54472	2.62877	1.70671	0.94362	2.53913	0.717445	0.00452222	0.106667	3.33333	9.9863	1.02797	0.000734104	0.470245	3.4333	3.69596
WT_NT WT 2 non traité x40_DSP (2)	2.07314	0.325862	0.909794	3.06879	0.537361	2.24719	2.38725	1.6954	0.998942	0.769634	0.434911	0.00375556	0.04	0	4.2517	0.981897	0.000668278	0.163178	1.76793	2.39729
WT_NT WT 2 non traité x40_DSP (3)	2.33369	0.241412	0.322801	4.1423	0.383754	2.6478	2.13532	1.42346	1.03185	1.67752	0.626521	0.00913333	0.243333	4.5	14.0291	1.08147	0.00165489	0.48955	1.76055	2.71911
WT_NT WT 2 non traité x40_DSP (4)	2.40075	0.223474	0.0911842	4.47479	0.227783	1.92529	3.54309	2.77366	0.901492	2.77966	0.735426	0.00495556	0.18	3.5	14.939	1.00044	0.000760258	0.724337	5.36977	12.2373
WT_NT WT 2 non traité x40_DSP (5)	2.28317	0.255871	0.209365	3.90823	0.459207	2.52294	2.25086	1.39316	0.952625	4.25333	0.809645	0.00437778	0.085	1.5	7.22257	0.963721	0.000743353	0.225303	1.45535	2.62414
WT_NT WT 2 non traité x40_DSP (6)	1.9571	0.372441	0.376134	2.68499	0.501299	1.55833	5.1801	3.53278	0.819727	0.829384	0.453368	0.00428889	0.0516667	3.5	10.08	0.958495	0.00073477	0.227626	9.62447	11.0894
WT_NT WT 2 non traité x40_DSP (7)	1.93507	0.382007	0.50763	2.61775	0.720721	2.18421	3.33856	2.59032	0.98284	1.16216	0.5375	0.00355556	0	0	1.68023	0.96214	0.000628385	0.30104	7.89235	8.78269
WT_NT WT 2 non traité x40_DSP (8)	2.10038	0.315801	0.724602	3.16655	0.563071	2.49367	1.94079	1.38109	1.04947	1.54545	0.607143	0.00342222	0.03	2	6.5508	0.965133	0.000583164	0.0805823	1.57262	1.92888
WT_NT WT 2 non traité x40_DSP (9)	1.86096	0.416029	2.09725	2.40368	0.825743	2.32	1.72062	1.30365	1.06216	0.376238	0.273381	0.00463333	0	0	0.710526	1.00406	0.000926557	0	1.57823	1.62073
WT_NT WT 3 non traité x40_DSP (1)	2.87358	0.129663	0.374115	7.71228	0.377637	4.71486	2.17927	1.66351	0.99483	2.11486	0.678959	0.0204889	0.425	2.28571	47.5527	1.24494	0.00400839	0.118743	2.82009	3.14278
WT_NT WT 3 non traité x40_DSP (10)	2.46843	0.206722	0.157382	4.8374	0.416334	3.04605	3.82422	2.94034	0.975898	2.06303	0.673525	0.0081	0.201667	1.2	22.4542	1.03828	0.00136385	0.318605	17.6837	18.2244
WT_NT WT 3 non traité x40_DSP (11)	2.52638	0.193381	0.541591	5.17114	0.336207	2.86782	1.9842	1.30201	0.956448	1.30841	0.566802	0.00823333	0.201667	12	16.8	1.0922	0.00149537	0.348508	1.02832	1.8407
WT_NT WT 3 non traité x40_DSP (12)	2.83787	0.135105	0.0630822	7.40166	0.184085	2.89259	3.13395	2.19895	0.910855	4.40244	0.814898	0.00984444	0.545	4.75	32.8476	1.11573	0.00147504	0.300489	3.07546	6.44973
WT_NT WT 3 non traité x40_DSP (13)	2.48193	0.203535	0.213771	4.91317	0.319317	2.68812	2.09737	1.23154	0.968224	3.37838	0.771605	0.0108	0.331667	1.25	17.328	1.11146	0.00195084	0.514202	1.3637	1.59983
WT_NT WT 3 non traité x40_DSP (14)	2.54424	0.189445	0.380783	5.27857	0.382637	3.44828	1.81364	1.35205	1.05607	2.4	0.705882	0.00793333	0.161667	4.5	17.1607	1.06035	0.00139664	0.261968	1.60053	1.65736
WT_NT WT 3 non traité x40_DSP (15)	2.30967	0.248181	1.41715	4.02932	0.688093	3.31818	1.71416	1.25411	0.992762	0.984802	0.496172	0.00725556	0.01	1.33333	11.4846	1.10536	0.00145802	0.078266	1.31977	1.32103
WT_NT WT 3 non traité x40_DSP (16)	2.42049	0.218454	0.564012	4.57763	0.390638	2.70455	1.79897	1.1977	0.945293	1.40796	0.584711	0.00537778	0.005	6	12.7208	1.06241	0.000907108	0.14374	1.65367	1.94614
WT_NT WT 3 non traité x40_DSP (17)	2.53803	0.190804	0.11169	5.24098	0.157321	2	1.82578	1.23619	0.96211	2.68229	0.72843	0.00785556	0.51	14	18.6485	1.08747	0.00121995	0.49036	1.5297	2.0909
WT_NT WT 3 non traité x40_DSP (18)	2.8727	0.129793	0.143586	7.70455	0.193155	3.05058	3.49644	2.97004	0.900912	0.615686	0.381068	0.00915556	0.305	11	13.4554	1.0914	0.0013391	0.694115	8.79316	12.2271
WT_NT WT 3 non traité x40_DSP (19)	2.57423	0.183016	0.236782	5.464	0.254257	2.71429	2.52678	1.77574	0.985163	1.32796	0.570439	0.00962222	0.303333	4.33333	26.3077	1.10255	0.00172522	0.307715	1.67477	6.29259
WT_NT WT 3 non traité x40_DSP (2)	3.05244	0.105532	0.130363	9.47578	0.171783	4.3042	1.79733	1.50443	1.09594	3.30449	0.767684	0.0149222	0.576667	7.25	49.9796	1.19287	0.00236296	0.295158	2.05433	2.86261
WT_NT WT 3 non traité x40_DSP (3)	2.77912	0.144559	0.274532	6.91757	0.268006	3.64372	1.69331	1.38856	1.01746	2.98521	0.749072	0.0149667	0.116667	3	34.2874	1.1814	0.00269439	0.0272468	1.88524	2.13245
WT_NT WT 3 non traité x40_DSP (4)	2.71276	0.156037	0.19965	6.40876	0.308353	3.39352	2.33966	1.58901	0.95357	3.08235	0.755043	0.0115667	0.34	4	23.5318	1.13816	0.00194837	0.198457	2.13737	2.86192
WT_NT WT 3 non traité x40_DSP (5)	2.55235	0.187686	0.12517	5.32805	0.253542	2.38756	3.06722	2.0712	0.889942	2.37198	0.703438	0.00775556	0.181667	5.5	13.3625	1.08061	0.00123954	0.455781	1.28148	4.44583
WT_NT WT 3 non traité x40_DSP (6)	2.56551	0.184863	0.0772393	5.40941	0.325283	2.42672	4.37737	3.60942	0.786575	3.65946	0.785383	0.00957778	0.256667	2.75	13.0517	1.11759	0.00168046	0.304643	9.32433	23.0077
WT_NT WT 3 non traité x40_DSP (7)	2.66603	0.16466	0.0778864	6.0731	0.2876	2.82833	3.99804	3.06605	0.868409	3.39906	0.772679	0.0104111	0.448333	4	27.4599	1.12303	0.00172041	0.134696	8.19351	19.0621
WT_NT WT 3 non traité x40_DSP (8)	2.90693	0.124779	0.089477	8.01417	0.170216	3.43902	1.68613	1.11584	1.0401	5.22165	0.839271	0.0134111	0.935	6.4	46.9141	1.15592	0.00201643	0.57926	1.60845	1.68612
WT_NT WT 3 non traité x40_DSP (9)	2.61093	0.175444	0.235286	5.69984	0.191874	2.66111	1.57904	1.32361	1.06584	1.89691	0.654804	0.00624444	0.13	0	13.6984	1.02705	0.000997516	0.295277	1.05469	1.96624

## Sheet: input_MorphoCellSorter
microglia	PerimeterAreaRatio	ModifiedCircularity	RoundnessFactor	RamificationIndex	Solidity	Convexity	ConvexHullRadiiRatio	SpanRatio	ConvexHullCircularity	ProcessesSomaAreasRatio	ProcessesCellAreasRatio	Density	BranchingIndex	EndpointsBranchpointsRatio	SkeletonProcessesRatio	FractalDimension	LacunaritySlope	PolarizationIndex	Linearity	Inertia
Phox2bKO_NT E3 cre mutant NTx40- (1)	2.13336	3.28908	6.43358	3.28908	2.00204	2.01657	0.155434	0.155434	0.867513	2.4386	0.709184	0.0108889	0.125	0	2.41871	1.09412	0.00219908	0.788954	11.6231	16.6307
Phox2bKO_NT E3 cre mutant NTx40- (10)	1.97595	2.74391	1.01924	2.74391	1.42361	2.23077	0.981124	0.981124	0.970021	0.607143	0.377778	0.008	0.02	2	6.79779	1.11714	0.00167257	0.117851	3.47254	4.08936
Phox2bKO_NT E3 cre mutant NTx40- (100)	2.79125	7.01489	5.22856	7.01489	5.16324	2.944	0.191257	0.191257	0.953626	1.49573	0.599315	0.00973333	0.316667	12	34.7143	1.12904	0.00155781	0.32053	2.02606	3.91745
Phox2bKO_NT E3 cre mutant NTx40- (101)	2.59347	5.58634	6.54732	5.58634	3.30987	2.84783	0.152734	0.152734	0.927452	2.89324	0.743144	0.0121556	0.208333	4.5	19.2189	1.1331	0.00220584	0.183904	3.8278	6.45277
Phox2bKO_NT E3 cre mutant NTx40- (102)	2.5413	5.26071	14.0472	5.26071	3.55479	2.3554	0.0711888	0.0711888	0.844166	3.72662	0.788432	0.0146	0.416667	1.6	30.583	1.15768	0.00266608	1.13643	1.59662	17.5317
Phox2bKO_NT E3 cre mutant NTx40- (103)	2.50916	5.06963	6.03055	5.06963	3.42235	2.86275	0.165822	0.165822	1.04465	3.20717	0.762311	0.0117333	0.203333	4	18.7938	1.10829	0.00213972	0.370554	3.10872	4.08902
Phox2bKO_NT E3 cre mutant NTx40- (104)	2.42234	4.58738	5.73915	4.58738	2.71452	2.80282	0.174242	0.174242	1.00665	3.40441	0.772955	0.00665556	0.285	2.5	12.149	1.02599	0.00114862	0.51196	4.80243	4.9615
Phox2bKO_NT E3 cre mutant NTx40- (105)	2.71962	6.45963	15.6633	6.45963	5.90674	2.62381	0.0638435	0.0638435	0.987185	3.78512	0.791019	0.00643333	0.31	12	20.5437	1.03095	0.000926816	0.583302	4.95748	5.05467
Phox2bKO_NT E3 cre mutant NTx40- (106)	2.50422	5.04087	4.90497	5.04087	3.71677	2.31507	0.203875	0.203875	0.885404	1.63934	0.621118	0.00894444	0.141667	4	20.808	1.09889	0.00157832	0.290641	4.19853	4.31536
Phox2bKO_NT E3 cre mutant NTx40- (107)	2.48109	4.90838	7.27571	4.90838	3.70539	2	0.137444	0.137444	0.784348	1.24813	0.555187	0.0133889	0.463333	10	16.7952	1.15491	0.00253554	0.515325	10.492	20.324
Phox2bKO_NT E3 cre mutant NTx40- (108)	2.52007	5.13367	12.7463	5.13367	3.6545	2.53266	0.0784543	0.0784543	0.943112	4.04605	0.801825	0.00852222	0.156667	4	19.6748	1.04661	0.00140646	0.161479	6.81123	7.37943
Phox2bKO_NT E3 cre mutant NTx40- (109)	2.39945	4.46806	5.86757	4.46806	5.82077	1.75909	0.170428	0.170428	0.94986	1.60699	0.616415	0.00663333	0.148333	0	10.1114	1.02582	0.00113948	0.204636	2.76623	3.12965
Phox2bKO_NT E3 cre mutant NTx40- (11)	2.59009	5.56471	4.88641	5.56471	4.17774	2.70391	0.204649	0.204649	0.993164	1.83962	0.647841	0.00668889	0.23	10	19.8564	1.07224	0.00106232	0.146951	1.41833	3.59384
Phox2bKO_NT E3 cre mutant NTx40- (110)	2.33138	4.13126	6.89749	4.13126	3.79542	1.81	0.14498	0.14498	0.853543	1.47368	0.595745	0.00678889	0.141667	0	10.9038	1.019	0.00113059	0.567822	6.11567	8.76839
Phox2bKO_NT E3 cre mutant NTx40- (111)	2.31944	4.07486	5.71819	4.07486	2.226	2.05732	0.17488	0.17488	0.753274	1.46305	0.594	0.00555556	0.151667	5	19.4478	0.985797	0.000908783	0.5	9.02899	21.2973
Phox2bKO_NT E3 cre mutant NTx40- (112)	2.21791	3.62534	1.80579	3.62534	2.56935	2.19178	0.553773	0.553773	0.969081	1.35741	0.575806	0.00688889	0.05	6	5.17927	1.05595	0.00130418	0.0898027	1.92568	1.94548
Phox2bKO_NT E3 cre mutant NTx40- (113)	2.60686	5.67315	12.0848	5.67315	3.23909	2.56538	0.0827485	0.0827485	0.813841	4.02283	0.800909	0.0122222	0.298333	1.33333	29.7889	1.13912	0.00214422	0.13484	5.82874	12.6175
Phox2bKO_NT E3 cre mutant NTx40- (114)	2.57873	5.49236	4.40404	5.49236	3.85415	2.8	0.227064	0.227064	1.00084	1.37204	0.578422	0.0111222	0.293333	2.66667	17.9689	1.11856	0.00200673	0.27005	3.63389	7.14321
Phox2bKO_NT E3 cre mutant NTx40- (115)	2.63426	5.85495	4.14689	5.85495	3.83144	2.95673	0.241145	0.241145	0.988484	2.05923	0.673121	0.00975556	0.358333	1.57143	25.599	1.08773	0.00161766	0.438729	1.9959	2.00949
Phox2bKO_NT E3 cre mutant NTx40- (116)	2.70105	6.32292	11.7875	6.32292	3.86953	3.12	0.0848353	0.0848353	0.970658	4.24242	0.809249	0.0134556	0.398333	3	27.7806	1.13655	0.00240474	0.363486	1.9037	6.87967
Phox2bKO_NT E3 cre mutant NTx40- (117)	2.74013	6.61397	13.508	6.61397	4.85103	2.40798	0.0740302	0.0740302	0.801875	2.54747	0.718109	0.0124556	0.733333	5.5	24.0012	1.14244	0.00209022	0.267142	12.3157	14.2284
Phox2bKO_NT E3 cre mutant NTx40- (118)	2.89606	7.91454	4.63402	7.91454	4.26312	3.90909	0.215795	0.215795	1.0198	2.6469	0.725795	0.0150333	0.466667	5	36.7617	1.16447	0.00258734	0.243162	1.31943	1.75372
Phox2bKO_NT E3 cre mutant NTx40- (119)	2.27672	3.87932	1.15704	3.87932	2.07831	2.72956	0.864277	0.864277	1.01436	1.3271	0.570281	0.0110667	0.06	6	5.72007	1.1051	0.00230108	0.158431	1.11276	1.22298
Phox2bKO_NT E3 cre mutant NTx40- (12)	2.50773	5.06126	3.49051	5.06126	2.64842	3.21512	0.286491	0.286491	1.03379	2.86179	0.741053	0.0105556	0.211667	2.25	15.6605	1.10446	0.00196846	0.45422	2.01975	2.02155
Phox2bKO_NT E3 cre mutant NTx40- (120)	2.74737	6.66927	9.24824	6.66927	4.62287	3.01569	0.108129	0.108129	0.972218	3.16535	0.759924	0.0117556	0.333333	5.5	25.791	1.13093	0.00198917	0.153719	1.94578	5.32956
Phox2bKO_NT E3 cre mutant NTx40- (121)	2.74862	6.67892	7.78072	6.67892	4.72318	2.96512	0.128523	0.128523	0.964834	3.76712	0.79023	0.0116	0.336667	4	21.4412	1.15301	0.0019327	0.40234	1.05982	1.67495
Phox2bKO_NT E3 cre mutant NTx40- (122)	2.60643	5.67034	6.58287	5.67034	4.32113	2.62332	0.151909	0.151909	0.961702	2.93953	0.746163	0.00941111	0.488333	2.75	22.0316	1.10055	0.00159124	0.543286	2.80007	2.94402
Phox2bKO_NT E3 cre mutant NTx40- (123)	2.2864	3.9228	8.71754	3.9228	3.36842	1.83425	0.114711	0.114711	0.858177	1.54464	0.607018	0.00633333	0.165	4	8.74277	1.02648	0.00110145	0.670166	2.14258	7.07091
Phox2bKO_NT E3 cre mutant NTx40- (124)	2.27303	3.86287	1.30463	3.86287	2.84146	2.12571	0.766499	0.766499	0.927611	0.692661	0.409214	0.0082	0.101667	8	10.7583	1.04026	0.00159228	0.184053	1.18879	1.62265
Phox2bKO_NT E3 cre mutant NTx40- (125)	2.43117	4.63424	10.0805	4.63424	3.18587	2.0625	0.099201	0.099201	0.794381	1.26535	0.558567	0.0114778	0.621667	10	5.43501	1.14525	0.00215184	0.705393	34.0255	37.1661
Phox2bKO_NT E3 cre mutant NTx40- (126)	2.56813	5.42574	22.9953	5.42574	7.00152	1.79273	0.0434871	0.0434871	0.874281	1.869	0.651446	0.0073	0.411667	0	13.1425	1.02541	0.00117246	0.384241	19.0562	21.2496
Phox2bKO_NT E3 cre mutant NTx40- (127)	2.54226	5.26652	10.5627	5.26652	2.98285	3.02353	0.094673	0.094673	0.991531	4.22759	0.808707	0.00842222	0.315	2	17.3067	1.06151	0.00143506	0.662808	5.7577	8.78485
Phox2bKO_NT E3 cre mutant NTx40- (128)	2.64766	5.94602	16.3758	5.94602	5.76006	1.96403	0.0610659	0.0610659	0.792748	2.56915	0.719821	0.00745556	0.493333	14	24.5983	1.04751	0.00110381	0.397458	8.57031	11.5816
Phox2bKO_NT E3 cre mutant NTx40- (129)	2.25739	3.79394	4.32122	3.79394	2.22554	2.48077	0.231416	0.231416	0.975469	2.60784	0.722826	0.00408889	0.0533333	2	9.3985	0.992828	0.000678932	0.379502	2.96569	5.88769
Phox2bKO_NT E3 cre mutant NTx40- (13)	2.8871	7.83333	8.27655	7.83333	5.77862	3.26255	0.120823	0.120823	1.0012	3.30698	0.767819	0.0102889	0.461667	6.66667	38.2911	1.13909	0.00153043	0.470513	1.60493	1.60505
Phox2bKO_NT E3 cre mutant NTx40- (130)	2.37596	4.34884	7.9794	4.34884	2.26221	2.82895	0.125323	0.125323	0.978403	3.77301	0.790488	0.00864444	0.296667	2.5	13.7626	1.06238	0.00158076	0.561168	10.0951	11.2973
Phox2bKO_NT E3 cre mutant NTx40- (131)	2.46893	4.84017	8.21785	4.84017	3.37303	2.16931	0.121686	0.121686	0.823135	1.52655	0.604203	0.00634444	0.203333	6	16.3043	1.02051	0.00101962	0.426775	9.3385	9.54537
Phox2bKO_NT E3 cre mutant NTx40- (132)	2.2777	3.8837	2.25081	3.8837	1.95231	2.50714	0.444284	0.444284	0.902002	0.867816	0.464615	0.00722222	0.0466667	4	5.29801	1.05684	0.00134912	0.156893	5.38294	6.37819
Phox2bKO_NT E3 cre mutant NTx40- (133)	2.1154	3.22178	2.4938	3.22178	1.69151	2.51	0.400994	0.400994	1.01325	1.50259	0.600414	0.00536667	0.0216667	2	1.98621	1.04304	0.000986682	0.34653	2.12165	5.45513
Phox2bKO_NT E3 cre mutant NTx40- (134)	2.42099	4.58028	5.33999	4.58028	3.23057	2.3985	0.187266	0.187266	0.94121	1.3681	0.57772	0.00428889	0.121667	0	11.6637	1.00713	0.000642273	0.274098	3.00091	7.20589
Phox2bKO_NT E3 cre mutant NTx40- (135)	2.00748	2.84535	1.07389	2.84535	1.56102	2.42574	0.931195	0.931195	1.06516	0.625344	0.384746	0.00655556	0.065	2	1.42731	1.02962	0.00132136	0.184115	2.7024	3.14934
Phox2bKO_NT E3 cre mutant NTx40- (136)	2.02199	2.89328	7.37158	2.89328	1.83307	1.46286	0.135656	0.135656	0.684542	2.06897	0.674157	0.00692222	0.0866667	1.33333	14.4857	1.04617	0.00119386	0.126694	3.1861	45.6668
Phox2bKO_NT E3 cre mutant NTx40- (137)	2.73325	6.56176	4.30992	6.56176	4.11475	2.98734	0.232023	0.232023	0.923499	1.79153	0.641773	0.0183	0.795	2.4	43.7323	1.20061	0.00335921	0.369611	3.04449	3.10625
Phox2bKO_NT E3 cre mutant NTx40- (138)	2.73283	6.55859	13.4449	6.55859	4.14021	3.26794	0.0743778	0.0743778	1.01385	5.34559	0.84241	0.00958889	0.61	1.71429	31.3631	1.1204	0.00149195	1.20351	1.21803	2.55414
Phox2bKO_NT E3 cre mutant NTx40- (139)	2.70629	6.36119	15.4904	6.36119	4.66501	2.50588	0.0645562	0.0645562	0.850841	3.69591	0.787049	0.00892222	0.336667	1.6	32.8101	1.07575	0.00140031	0.490254	6.91796	9.36204
Phox2bKO_NT E3 cre mutant NTx40- (14)	2.51991	5.13275	3.21866	5.13275	3.27252	2.88938	0.310688	0.310688	1.01835	2.11111	0.678571	0.0143111	0.315	3.66667	19.3364	1.17877	0.00274014	0.290908	1.32074	1.87097
Phox2bKO_NT E3 cre mutant NTx40- (140)	2.67669	6.14811	11.8011	6.14811	3.51462	3.0427	0.084738	0.084738	0.927806	3.66364	0.785575	0.0171	1.42333	1.57143	26.799	1.18117	0.00315792	1.19344	4.9622	12.6711
Phox2bKO_NT E3 cre mutant NTx40- (141)	2.70957	6.3853	8.3541	6.3853	4.79034	2.61317	0.119702	0.119702	0.895714	2.72986	0.731893	0.00874444	0.295	12	21.7778	1.06757	0.00141824	0.328641	1.21275	4.51809
Phox2bKO_NT E3 cre mutant NTx40- (142)	2.49246	4.97305	5.55467	4.97305	3.55639	2.51515	0.180029	0.180029	0.953775	2.16667	0.684211	0.00886667	0.203333	0	17.2326	1.07558	0.00150347	0.111943	1.55392	5.00676
Phox2bKO_NT E3 cre mutant NTx40- (143)	2.42634	4.60854	1.69159	4.60854	3.04403	2.86111	0.591158	0.591158	1.08317	1.58537	0.613208	0.00706667	0.0666667	3	17.6641	1.01291	0.0012204	0.168232	1.02649	1.08186
Phox2bKO_NT E3 cre mutant NTx40- (15)	2.59033	5.56621	7.44931	5.56621	4.26952	2.62264	0.134241	0.134241	0.973574	4.63121	0.822418	0.00882222	0.205	2	30.0153	1.08739	0.00139701	0.191112	1.6303	1.63106
Phox2bKO_NT E3 cre mutant NTx40- (16)	2.83465	7.37428	6.8711	7.37428	4.9856	3.49785	0.145537	0.145537	1.05911	2.96735	0.747942	0.0108	0.438333	6	27.3466	1.12056	0.0016439	0.585314	2.06011	2.07902
Phox2bKO_NT E3 cre mutant NTx40- (17)	2.62823	5.81447	3.72557	5.81447	3.6903	2.98347	0.268415	0.268415	0.985696	1.58861	0.613692	0.0136333	0.178333	4.5	22.4436	1.14401	0.00245653	0.171289	1.11832	3.5541
Phox2bKO_NT E3 cre mutant NTx40- (18)	2.48189	4.91291	10.2882	4.91291	3.59098	2.08654	0.0971989	0.0971989	0.804811	3.40426	0.772947	0.0069	0.23	2.5	18.8021	1.02362	0.00115271	0.380693	6.09956	9.08795
Phox2bKO_NT E3 cre mutant NTx40- (19)	2.66542	6.06881	8.83364	6.06881	5.16045	2.19931	0.113204	0.113204	0.823242	1.44475	0.59096	0.00983333	0.485	16	25.2868	1.08976	0.00154428	0.430477	4.73058	9.79041
Phox2bKO_NT E3 cre mutant NTx40- (2)	2.26272	3.81731	9.83243	3.81731	2.42154	2.04142	0.101704	0.101704	0.832186	2.71429	0.730769	0.00722222	0.25	0	11.2189	1.06644	0.00125401	0.612686	16.5779	21.9625
Phox2bKO_NT E3 cre mutant NTx40- (20)	2.83319	7.36187	12.6569	7.36187	7.93319	2.82918	0.0790084	0.0790084	1.08242	3.57143	0.78125	0.0103111	0.67	3.6	37.5517	1.10258	0.00156593	0.238981	1.97775	2.15804
Phox2bKO_NT E3 cre mutant NTx40- (21)	2.91831	8.11989	11.5218	8.11989	4.46103	4.07273	0.0867917	0.0867917	1.05938	8.28834	0.892338	0.0168222	0.776667	2.3	74.3812	1.21157	0.00273191	0.236944	1.55228	2.24398
Phox2bKO_NT E3 cre mutant NTx40- (22)	2.77543	6.88827	6.14413	6.88827	4.91764	3.17391	0.162757	0.162757	1.02179	1.95862	0.662005	0.0143	0.385	6	36.3568	1.18504	0.00248256	0.11493	5.18507	5.38117
Phox2bKO_NT E3 cre mutant NTx40- (23)	2.78207	6.94112	7.53871	6.94112	4.06509	3.48485	0.132649	0.132649	1.01225	3.53896	0.779685	0.0155333	0.465	1.2	37.4349	1.1723	0.00271666	0.519299	1.23253	2.65356
Phox2bKO_NT E3 cre mutant NTx40- (24)	2.72949	6.53341	4.31658	6.53341	4.11515	3.4593	0.231665	0.231665	1.07409	2.83721	0.739394	0.00733333	0.158333	0	13.7787	1.08014	0.00108863	0.443813	1.11497	1.15993
Phox2bKO_NT E3 cre mutant NTx40- (25)	2.37459	4.342	6.73005	4.342	3.29896	2.26596	0.148587	0.148587	0.947872	3.55952	0.780679	0.00851111	0.226667	2.5	16.7224	1.05472	0.00147483	0.357683	1.72065	3.7788
Phox2bKO_NT E3 cre mutant NTx40- (26)	2.59524	5.59776	2.60115	5.59776	3.07227	3.11894	0.384445	0.384445	0.976614	1.46228	0.593873	0.0141444	0.235	2.66667	30.1601	1.16296	0.00272067	0.0626716	1.01173	3.84792
Phox2bKO_NT E3 cre mutant NTx40- (27)	2.85847	7.57935	10.4736	7.57935	4.97386	3.32155	0.0954781	0.0954781	0.977363	5.83799	0.853758	0.0136	0.573333	2.71429	52.3981	1.16691	0.00223166	0.412231	1.09977	1.79559
Phox2bKO_NT E3 cre mutant NTx40- (28)	2.78022	6.92634	17.7779	6.92634	5.92301	2.6246	0.0562496	0.0562496	0.92221	4.83422	0.828598	0.0121222	0.771667	3.33333	38.2699	1.12934	0.00196801	0.696988	1.78178	5.05538
Phox2bKO_NT E3 cre mutant NTx40- (29)	2.65682	6.00906	4.0353	6.00906	2.51121	4.06696	0.247813	0.247813	1.07252	3.46098	0.775834	0.0203222	0.608333	2.16667	25.9789	1.23123	0.00404648	0.465895	2.54173	2.58049
Phox2bKO_NT E3 cre mutant NTx40- (3)	2.79259	7.02567	6.71846	7.02567	4.97289	3.275	0.148844	0.148844	1.03951	2.14196	0.681727	0.0110667	0.52	4	37.7025	1.12013	0.00182144	0.539597	3.50771	3.96506
Phox2bKO_NT E3 cre mutant NTx40- (30)	2.73611	6.5834	23.5521	6.5834	8.4523	2.10526	0.0424591	0.0424591	0.929702	3.30964	0.767962	0.00943333	0.795	10	35.9034	1.11625	0.0013818	0.790104	2.42018	3.76386
Phox2bKO_NT E3 cre mutant NTx40- (31)	3.06841	9.65157	18.6012	9.65157	7.41234	3.22195	0.05376	0.05376	0.908862	4.68127	0.823983	0.0158444	1.075	6.5	56.6502	1.18221	0.00242461	0.371684	2.34906	3.65606
Phox2bKO_NT E3 cre mutant NTx40- (32)	2.82144	7.26302	12.2651	7.26302	5.50204	3.17323	0.0815321	0.0815321	1.02482	2.69811	0.729592	0.0108889	0.831667	3.16667	40.8965	1.11438	0.0016457	0.83054	4.55623	4.55851
Phox2bKO_NT E3 cre mutant NTx40- (33)	2.16584	3.41442	1.06984	3.41442	1.77491	2.78095	0.934721	0.934721	1.08509	1.22989	0.551546	0.00646667	0.01	0	5.76012	1.08293	0.00126755	0.0414513	1.85495	1.95006
Phox2bKO_NT E3 cre mutant NTx40- (34)	2.77941	6.91994	6.16345	6.91994	4.85155	3.14403	0.162247	0.162247	1.00075	2.50181	0.714433	0.0107778	0.488333	2.8	37.404	1.11136	0.00182727	0.47407	3.31179	3.31194
Phox2bKO_NT E3 cre mutant NTx40- (35)	2.83266	7.35743	9.47991	7.35743	4.62825	3.21014	0.105486	0.105486	0.938657	3.56126	0.780763	0.0128222	0.64	1.57143	53.7181	1.1357	0.00212507	0.171647	1.7309	5.25216
Phox2bKO_NT E3 cre mutant NTx40- (36)	2.48351	4.92211	9.56757	4.92211	4.97533	2.16038	0.10452	0.10452	0.979015	2.3125	0.698113	0.00765556	0.563333	1.33333	22.921	1.03377	0.00126195	0.591424	4.83504	7.12631
Phox2bKO_NT E3 cre mutant NTx40- (37)	2.74251	6.63209	12.2821	6.63209	4.65646	2.68551	0.0814195	0.0814195	0.873785	3.40928	0.773206	0.0116111	0.485	2.75	32.8824	1.1253	0.00197423	0.360754	5.53659	5.53796
Phox2bKO_NT E3 cre mutant NTx40- (38)	2.35094	4.22535	5.50835	4.22535	2.15949	2.48023	0.181542	0.181542	0.862588	2.63983	0.725262	0.00954444	0.278333	1.16667	18.3772	1.08906	0.00178209	0.778046	4.7776	10.6262
Phox2bKO_NT E3 cre mutant NTx40- (39)	2.28161	3.90123	6.10536	3.90123	3.42015	1.83553	0.16379	0.16379	0.870124	1.59236	0.614251	0.00452222	0.161667	2	12.544	0.976743	0.000754493	0.547498	3.39895	9.66745
Phox2bKO_NT E3 cre mutant NTx40- (4)	2.56326	5.3954	2.59073	5.3954	2.76162	3.44099	0.385991	0.385991	1.05984	1.55793	0.609058	0.00932222	0.371667	4.5	24.9883	1.10129	0.00169165	0.34002	2.46346	2.63769
Phox2bKO_NT E3 cre mutant NTx40- (40)	2.02101	2.89	1.09607	2.89	1.34983	2.43137	0.912354	0.912354	0.977447	0.636872	0.389078	0.00651111	0.0183333	0	0.859649	1.07094	0.00131636	0.123929	3.57233	4.32444
Phox2bKO_NT E3 cre mutant NTx40- (41)	2.21369	3.60777	6.23674	3.60777	3.35294	1.79085	0.16034	0.16034	0.908935	3.33019	0.769063	0.0051	0.111667	2	6.25779	0.988401	0.00087864	0.396059	1.97556	3.58795
Phox2bKO_NT E3 cre mutant NTx40- (42)	2.5565	5.35361	13.0182	5.35361	4.17852	2.16736	0.0768156	0.0768156	0.827554	3.86928	0.794631	0.00827778	0.396667	0	13.0811	1.1338	0.00135291	0.813477	5.10158	7.58895
Phox2bKO_NT E3 cre mutant NTx40- (43)	2.4609	4.79561	2.46815	4.79561	5.26331	2.09479	0.405162	0.405162	1.00213	1.23841	0.553254	0.00751111	0.166667	16	11.2968	1.05754	0.00129761	0.138675	1.01819	1.46224
Phox2bKO_NT E3 cre mutant NTx40- (44)	2.58068	5.50471	1.79484	5.50471	2.66136	3.58511	0.557151	0.557151	1.06248	1.70522	0.630344	0.0132556	0.138333	1.66667	36.6436	1.16375	0.00249364	0.349829	1.24346	1.24408
Phox2bKO_NT E3 cre mutant NTx40- (45)	2.35427	4.24161	2.95249	4.24161	2.06109	2.90698	0.338697	0.338697	0.983919	1.488	0.598071	0.00691111	0.0316667	1.5	15.9382	1.0226	0.00124405	0.120289	6.17772	7.63858
Phox2bKO_NT E3 cre mutant NTx40- (46)	2.73987	6.61199	13.8582	6.61199	4.36653	2.92053	0.0721592	0.0721592	0.922991	2.96639	0.747881	0.0157333	0.688333	1.71429	34.8102	1.17902	0.00276298	0.664899	3.88484	11.6478
Phox2bKO_NT E3 cre mutant NTx40- (47)	2.71942	6.45808	21.2458	6.45808	5.53919	2.42671	0.0470682	0.0470682	0.884377	4.21675	0.80831	0.0117667	0.621667	4.5	30.6589	1.12615	0.00187847	0.61765	1.77779	11.2711
Phox2bKO_NT E3 cre mutant NTx40- (48)	2.43539	4.65683	9.21203	4.65683	2.45989	2.93985	0.108554	0.108554	0.990131	2.84247	0.73975	0.00623333	0.398333	1.6	18.2386	1.00981	0.00103572	1.08136	16.891	16.9395
Phox2bKO_NT E3 cre mutant NTx40- (49)	2.72139	6.47277	10.0087	6.47277	3.22535	3.3434	0.0999127	0.0999127	0.927655	3.54573	0.780013	0.0165667	0.471667	1.66667	37.9192	1.1846	0.0030401	0.231636	9.4435	9.88089
Phox2bKO_NT E3 cre mutant NTx40- (5)	2.63096	5.83277	7.99046	5.83277	5.24256	2.91304	0.125149	0.125149	1.14352	3.63448	0.784226	0.00746667	0.361667	10	12.759	1.08069	0.00118086	0.598858	1.43449	1.90468
Phox2bKO_NT E3 cre mutant NTx40- (50)	2.73018	6.53859	4.37846	6.53859	3.84166	3.37054	0.228391	0.228391	1.01036	3.08077	0.754948	0.0117889	0.191667	4.5	30.382	1.14125	0.00204784	0.122801	1.09185	1.38319
Phox2bKO_NT E3 cre mutant NTx40- (51)	2.56171	5.38582	4.95325	5.38582	3.71875	2.5288	0.201888	0.201888	0.905441	1.31884	0.56875	0.00711111	0.21	12	18.4725	1.10743	0.00120137	0.397256	1.19107	6.8378
Phox2bKO_NT E3 cre mutant NTx40- (52)	2.85059	7.5109	7.41318	7.5109	3.725	4.32946	0.134895	0.134895	1.11251	5.08997	0.835795	0.0195556	1.21333	2.22222	45.2508	1.22736	0.00351446	0.57653	2.3997	2.87684
Phox2bKO_NT E3 cre mutant NTx40- (53)	2.38545	4.39663	10.6869	4.39663	2.35543	2.61006	0.0935721	0.0935721	0.9111	2.96089	0.747532	0.00787778	0.196667	1.5	16.3189	1.03063	0.0013554	1.07412	24.3779	25.2794
Phox2bKO_NT E3 cre mutant NTx40- (54)	2.06686	3.04667	1.11599	3.04667	1.57143	2.18045	0.896067	0.896067	0.897157	0.521097	0.34258	0.00801111	0.0583333	0	5.24696	1.0423	0.00165239	0.105336	4.46957	4.86957
Phox2bKO_NT E3 cre mutant NTx40- (55)	2.42985	4.62724	4.8469	4.62724	2.62923	2.62222	0.206317	0.206317	0.918886	1.97842	0.664251	0.0092	0.225	3.5	17.1073	1.10722	0.00163369	0.575255	2.58609	6.89902
Phox2bKO_NT E3 cre mutant NTx40- (56)	2.76009	6.76769	5.99694	6.76769	4.125	3.15385	0.166752	0.166752	0.946482	2.4717	0.711957	0.0143111	0.525	1.75	41.4667	1.1679	0.00254145	0.236433	2.43363	3.14297
Phox2bKO_NT E3 cre mutant NTx40- (57)	2.35197	4.23038	3.48363	4.23038	2.02178	3.00893	0.287057	0.287057	1.01135	1.61658	0.617822	0.00561111	0.065	3	15.2596	1.02307	0.000942826	0.535844	6.11428	6.11462
Phox2bKO_NT E3 cre mutant NTx40- (58)	2.94178	8.34228	28.1429	8.34228	4.99632	3.36207	0.035533	0.035533	0.900838	9.35238	0.903404	0.0120778	1.045	3.2	48.8401	1.15688	0.00177353	1.00138	2.60386	3.49476
Phox2bKO_NT E3 cre mutant NTx40- (59)	2.89962	7.94702	5.43795	7.94702	4.39428	3.69498	0.183893	0.183893	0.974657	3.78838	0.791161	0.0128222	0.546667	1.42857	54.4677	1.16076	0.00208798	0.249783	1.41378	1.45535
Phox2bKO_NT E3 cre mutant NTx40- (6)	2.62326	5.78131	2.90666	5.78131	3.5601	2.93117	0.344038	0.344038	0.956635	1.70716	0.630609	0.0138667	0.475	3.25	23.8488	1.17085	0.00267143	0.433013	1.07299	2.71348
Phox2bKO_NT E3 cre mutant NTx40- (60)	2.60779	5.67925	7.16426	5.67925	3.5069	2.99177	0.139582	0.139582	0.986505	3.51211	0.778374	0.0144889	0.538333	1.6	19.866	1.17098	0.00273503	0.756364	2.07317	3.4532
Phox2bKO_NT E3 cre mutant NTx40- (61)	2.61248	5.70996	12.0576	5.70996	4.81211	2.36515	0.0829355	0.0829355	0.90864	2.6713	0.727617	0.00881111	0.265	2.66667	15.6412	1.06718	0.00142547	0.454763	1.40131	5.43307
Phox2bKO_NT E3 cre mutant NTx40- (62)	2.09812	3.1583	0.751702	3.1583	1.61031	2.53636	1.33031	1.33031	1.01909	0.533333	0.347826	0.0069	0.00333333	0.5	5.35185	1.08643	0.0013858	0.113501	2.1701	2.41682
Phox2bKO_NT E3 cre mutant NTx40- (64)	2.89995	7.95005	16.9582	7.95005	4.31292	3.6306	0.0589684	0.0589684	0.948405	4.16017	0.806208	0.0132444	0.741667	2.71429	55.5265	1.1475	0.00207692	0.194298	12.6238	13.0559
Phox2bKO_NT E3 cre mutant NTx40- (65)	2.70983	6.38719	5.97602	6.38719	3.95021	3.17978	0.167335	0.167335	0.989456	2.63307	0.724751	0.0156222	0.295	4.66667	33.2247	1.20477	0.00280767	0.430025	2.47294	3.05811
Phox2bKO_NT E3 cre mutant NTx40- (66)	1.98417	2.77	1.33139	2.77	1.4172	2.175	0.751093	0.751093	0.934749	0.914634	0.477707	0.00348889	0	0	1.70667	0.961653	0.000626948	0.0564333	3.24452	4.55495
Phox2bKO_NT E3 cre mutant NTx40- (67)	2.03242	2.92824	0.83834	2.92824	1.46605	2.4878	1.19283	1.19283	1.02869	0.54078	0.350978	0.00965556	0.005	0	6.34754	1.10167	0.00208371	0.101768	1.00487	3.56003
Phox2bKO_NT E3 cre mutant NTx40- (68)	2.38479	4.39327	1.41266	4.39327	2.25	3.11656	0.707885	0.707885	1.06409	1.08219	0.519737	0.0118222	0.0333333	1.66667	14.0036	1.12862	0.0023505	0.130066	1.79205	1.8399
Phox2bKO_NT E3 cre mutant NTx40- (69)	2.74656	6.66311	7.57243	6.66311	3.1479	3.53648	0.132058	0.132058	0.941684	2.67674	0.72802	0.0135222	0.501667	1.57143	38.6287	1.15187	0.00237529	0.320486	9.24333	11.177
Phox2bKO_NT E3 cre mutant NTx40- (7)	2.99624	8.88212	18.1134	8.88212	7.27071	3.20282	0.0552078	0.0552078	0.972308	5.86316	0.854294	0.0144889	0.726667	2.57143	54.3232	1.16211	0.00221544	0.138462	1.7193	1.93034
Phox2bKO_NT E3 cre mutant NTx40- (70)	2.68462	6.20448	2.43372	6.20448	3.09524	3.58744	0.410893	0.410893	1.01725	2	0.666667	0.0147	0.533333	1.375	32.7664	1.16638	0.00279666	0.393638	1.19259	1.36648
Phox2bKO_NT E3 cre mutant NTx40- (71)	2.6267	5.80422	7.56329	5.80422	3.19824	3.02439	0.132218	0.132218	0.931857	3.56281	0.780837	0.0100889	0.2	1.125	28.842	1.13409	0.00176811	0.234662	3.32953	6.77317
Phox2bKO_NT E3 cre mutant NTx40- (72)	2.62956	5.82338	2.33228	5.82338	2.96126	3.40625	0.428765	0.428765	1.00656	2.36715	0.703013	0.00774444	0.0883333	6	26.0592	1.0653	0.00127508	0.30538	1.01372	1.03933
Phox2bKO_NT E3 cre mutant NTx40- (73)	2.64695	5.94115	4.03193	5.94115	2.79163	3.36869	0.24802	0.24802	0.947368	2.54417	0.717846	0.0111444	0.18	3.33333	33.8	1.15372	0.00197051	0.246612	3.04576	4.13261
Phox2bKO_NT E3 cre mutant NTx40- (74)	2.21298	3.60484	5.39923	3.60484	2.32805	1.99379	0.185212	0.185212	0.843898	2.42935	0.708399	0.00701111	0.163333	6	8.87919	1.05751	0.00122087	0.716569	1.16404	6.79605
Phox2bKO_NT E3 cre mutant NTx40- (75)	2.42351	4.59358	3.28227	4.59358	2.55514	3.00654	0.304667	0.304667	1.04622	2.59459	0.721805	0.00886667	0.185	4	13.4444	1.07446	0.00162107	0.391002	2.24003	2.26194
Phox2bKO_NT E3 cre mutant NTx40- (76)	2.34025	4.17368	2.74568	4.17368	2.23889	2.70068	0.364209	0.364209	0.968211	2.41232	0.706944	0.008	0.0333333	4	8.55796	1.05055	0.00148039	0.283823	1.75827	2.32842
Phox2bKO_NT E3 cre mutant NTx40- (77)	2.60781	5.67939	3.3302	5.67939	2.9224	3.36464	0.300282	0.300282	1.01276	2.99563	0.749727	0.0101667	0.108333	1.33333	23.5117	1.12596	0.00183046	0.441062	1.07989	1.2808
Phox2bKO_NT E3 cre mutant NTx40- (78)	2.35825	4.26109	4.49882	4.26109	2.67593	2.53714	0.222281	0.222281	0.974004	3.27723	0.766204	0.0096	0.261667	6	11.4335	1.10742	0.00175608	0.693889	1.72153	1.7648
Phox2bKO_NT E3 cre mutant NTx40- (79)	2.39293	4.43467	3.44846	4.43467	2.61528	2.62893	0.289984	0.289984	0.958686	1.03161	0.507779	0.00785556	0.09	0	11.4095	1.04954	0.001425	0.271201	12.7033	14.5617
Phox2bKO_NT E3 cre mutant NTx40- (8)	2.8495	7.50149	18.523	7.50149	5.1511	2.98855	0.0539869	0.0539869	0.904197	6.04878	0.858131	0.00963333	0.393333	3.25	38.8441	1.09048	0.00143262	0.107397	1.43834	4.57011
Phox2bKO_NT E3 cre mutant NTx40- (80)	2.2287	3.67065	1.05482	3.67065	1.79263	2.72131	0.948031	0.948031	0.992614	0.854701	0.460829	0.00723333	0.025	2	14.9633	1.05568	0.00140311	0.235159	1.07914	1.99712
Phox2bKO_NT E3 cre mutant NTx40- (81)	2.37481	4.34308	3.59245	4.34308	3.19967	2.2426	0.278362	0.278362	0.923649	1.30418	0.566007	0.00673333	0.14	3.5	19.1283	1.08747	0.00115399	0.385376	1.07785	4.59851
Phox2bKO_NT E3 cre mutant NTx40- (82)	1.74261	2.0975	0.3998	2.0975	1.06645	2.38889	2.50125	2.50125	1.17615	0.393519	0.282392	0.00334444	0	0	0.105882	0.938614	0.00064451	0	1.13368	1.22513
Phox2bKO_NT E3 cre mutant NTx40- (83)	2.45434	4.75952	3.57656	4.75952	2.81638	2.73714	0.279598	0.279598	0.965117	2.59821	0.722084	0.00895556	0.201667	2.5	16.1667	1.11074	0.00161283	0.332298	1.97305	2.33147
Phox2bKO_NT E3 cre mutant NTx40- (84)	2.162	3.39933	2.85171	3.39933	2.70732	1.96774	0.350667	0.350667	0.952456	2.7963	0.736585	0.00455556	0.0766667	6	11.1391	0.981203	0.000776992	0.069843	1.97482	2.34334
Phox2bKO_NT E3 cre mutant NTx40- (85)	2.29115	3.94429	4.24331	3.94429	2.09516	2.32895	0.235665	0.235665	0.854672	1.35662	0.575663	0.00712222	0.113333	4	12.1653	1.03048	0.00128313	0.212701	18.6429	18.6431
Phox2bKO_NT E3 cre mutant NTx40- (86)	2.28673	3.92427	2.54246	3.92427	2.67942	2.53642	0.39332	0.39332	1.05799	1.21637	0.548813	0.00842222	0.09	1.75	15.0024	1.09234	0.00156219	0.243653	3.54925	4.31257
Phox2bKO_NT E3 cre mutant NTx40- (87)	2.87295	7.70672	8.9672	7.70672	5.44059	3.31692	0.111518	0.111518	1.0039	4.98846	0.833012	0.0173	1.01333	2.8	35.3092	1.21154	0.00301545	0.544134	1.08953	1.16159
Phox2bKO_NT E3 cre mutant NTx40- (88)	2.74134	6.62318	10.6023	6.62318	4.46344	2.8871	0.0943195	0.0943195	0.920936	3.09692	0.755914	0.0103333	0.31	8	32.4339	1.1157	0.00163697	0.282081	2.73501	4.69098
Phox2bKO_NT E3 cre mutant NTx40- (89)	2.43462	4.65269	5.29012	4.65269	3.78114	2.26012	0.189031	0.189031	0.944579	2.10497	0.677936	0.00624444	0.15	0	12.4961	1.03542	0.00102141	0.567507	1.41445	1.91936
Phox2bKO_NT E3 cre mutant NTx40- (9)	2.20416	3.56842	3.40043	3.56842	2.51176	2.03015	0.294081	0.294081	0.901657	1.12058	0.528431	0.0113333	0.146667	0	5.41002	1.10396	0.00226662	0.309965	3.60761	6.38748
Phox2bKO_NT E3 cre mutant NTx40- (90)	2.33937	4.16947	6.54479	4.16947	3.59672	2.02339	0.152793	0.152793	0.920348	1.47964	0.596715	0.00608889	0.075	6	12.526	1.03056	0.00101249	0.528391	1.19621	9.25771
Phox2bKO_NT E3 cre mutant NTx40- (91)	2.61789	5.74564	2.86942	5.74564	3.47749	2.90393	0.348502	0.348502	0.942499	1.43936	0.590056	0.0118444	0.328333	3.33333	17.5278	1.16759	0.00220852	0.282378	1.05631	2.60665
Phox2bKO_NT E3 cre mutant NTx40- (92)	2.55698	5.35656	3.80472	5.35656	4.56522	2.72308	0.262832	0.262832	1.08619	1.77305	0.639386	0.00868889	0.123333	0	12.482	1.06421	0.00153413	0.14304	1.99953	2.5289
Phox2bKO_NT E3 cre mutant NTx40- (93)	2.24577	3.74352	2.08717	3.74352	1.98179	2.64748	0.479118	0.479118	0.995595	1.08967	0.521456	0.00854444	0.0583333	4	6.23441	1.06014	0.00165106	0.144244	4.8529	4.88875
Phox2bKO_NT E3 cre mutant NTx40- (94)	2.15836	3.38514	1.94179	3.38514	1.62604	3	0.514989	0.514989	1.13008	2.19469	0.686981	0.00401111	0.0333333	1.33333	10.0806	0.99085	0.000713952	0.337007	2.86136	3.15254
Phox2bKO_NT E3 cre mutant NTx40- (95)	2.73665	6.58746	7.57089	6.58746	4.62946	2.90041	0.132085	0.132085	0.947343	2.33086	0.699777	0.00995556	0.335	2.8	29.4992	1.09747	0.00161251	0.315167	3.06454	4.02305
Phox2bKO_NT E3 cre mutant NTx40- (96)	2.68581	6.21297	9.11471	6.21297	4.70264	2.70833	0.109713	0.109713	0.945309	3.46667	0.776119	0.00967778	0.211667	1.2	35.0828	1.08744	0.00154459	0.431269	2.62821	3.34203
Phox2bKO_NT E3 cre mutant NTx40- (97)	2.73332	6.5623	16.266	6.5623	4.22178	2.51195	0.0614779	0.0614779	0.786506	2.95652	0.747253	0.0111222	0.413333	2.25	45.7553	1.1188	0.00183292	0.158035	15.4368	22.1427
Phox2bKO_NT E3 cre mutant NTx40- (98)	2.58032	5.50244	8.67642	5.50244	3.89667	2.85859	0.115255	0.115255	1.02552	3.98225	0.799287	0.00935556	0.233333	3.33333	20.6895	1.1216	0.00153434	0.726983	1.76424	2.97252
Phox2bKO_NT E3 cre mutant NTx40- (99)	2.52964	5.19054	12.1384	5.19054	4.4096	2.11982	0.082383	0.082383	0.8576	3.31034	0.768	0.00694444	0.148333	2.2	22.5333	1.03583	0.00112783	0.72111	5.86122	7.29974
Phox2bKO_NT cre 3 non traité (1)	1.96422	2.70711	0.798554	2.70711	1.27041	2.67606	1.25226	1.25226	1.1142	1.07407	0.517857	0.00435556	0.005	0	1.97044	0.991369	0.000827136	0.214286	1.32785	1.57226
Phox2bKO_NT cre 3 non traité (2)	2.72034	6.46497	9.42114	6.46497	3.30453	3.51244	0.106144	0.106144	0.987636	4.82209	0.82824	0.0105444	0.205	2	34.6374	1.11894	0.00181576	0.165521	4.65749	5.00222
Phox2bKO_NT cre 3 non traité (3)	2.48376	4.92353	6.0582	4.92353	2.80389	2.88889	0.165066	0.165066	0.982506	3.30539	0.767733	0.00798889	0.248333	7.5	18.8478	1.07315	0.0013135	0.527413	4.07677	4.93032
Phox2bKO_NT cre 3 non traité (4)	2.34963	4.21899	2.59638	4.21899	2.30547	2.60839	0.385151	0.385151	0.938736	1.09428	0.522508	0.00691111	0.17	3.5	12.2123	1.04014	0.00125801	0.256742	5.64331	5.97273
Phox2bKO_NT cre 3 non traité (5)	2.46263	4.8052	1.46649	4.8052	2.41914	2.99355	0.681903	0.681903	0.968959	1.74815	0.636119	0.00824444	0.0566667	2.4	12.5614	1.06884	0.00152614	0.0519174	1.03912	1.25043
Phox2bKO_NT cre 3 non traité (6)	1.89215	2.49154	0.74664	2.49154	1.35253	2.2716	1.33933	1.33933	1.06032	0.528169	0.345622	0.00482222	0.0133333	0	2.40667	1.01694	0.000930296	0.0960031	1.82206	2.57033
Phox2bKO_NT cre 3 non traité (7)	2.48523	4.93185	7.98455	4.93185	3.53333	2.44805	0.125242	0.125242	0.933046	1.73529	0.634409	0.00516667	0.3	10	8.81695	1.00191	0.000827123	0.684702	10.482	12.7625
Phox2bKO_NT cre 3 non traité (8)	2.35624	4.25124	3.54214	4.25124	3.00693	2.33548	0.282315	0.282315	0.952627	1.33603	0.571924	0.00641111	0.188333	8	8.51212	0.998292	0.00110544	0.474661	5.68298	5.88049
Phox2bKO_NT cre non traité x40_DSP (1)	2.32207	4.08725	1.56666	4.08725	1.80233	3.27811	0.638301	0.638301	1.07673	1.5922	0.614227	0.0162444	0.075	3.5	14.2194	1.18643	0.00358962	0.262837	1.13552	3.19106
Phox2bKO_NT cre non traité x40_DSP (10)	2.32342	4.09358	1.54416	4.09358	2.35537	2.71528	0.6476	0.6476	1.01798	1.14793	0.534435	0.00806667	0.0683333	4	11.5696	1.08352	0.00156041	0.0524864	2.38947	2.4568
Phox2bKO_NT cre non traité x40_DSP (11)	2.64891	5.95453	2.69785	5.95453	2.99782	3.41921	0.370666	0.370666	0.994218	2.38916	0.704942	0.0152889	0.14	1.8	40.4165	1.17701	0.00293188	0.145174	1.93795	2.25098
Phox2bKO_NT cre non traité x40_DSP (12)	2.54685	5.29446	3.98798	5.29446	2.27539	3.27684	0.250754	0.250754	0.933601	1.93846	0.659686	0.0106111	0.123333	2	19.2063	1.13868	0.00192667	0.330001	2.26202	7.16412
Phox2bKO_NT cre non traité x40_DSP (13)	2.13118	3.28082	0.781074	3.28082	1.66478	2.57692	1.28029	1.28029	1.01344	1.16735	0.538606	0.0059	0.0233333	2	5.31818	1.05581	0.00114801	0.130189	1.01865	1.02594
Phox2bKO_NT cre non traité x40_DSP (14)	2.17841	3.46418	1.27625	3.46418	1.69199	2.71	0.783546	0.783546	1.01758	1.16444	0.537988	0.00541111	0.02	1.5	9.54198	1.04436	0.000990161	0.231059	1.87384	2.56499
Phox2bKO_NT cre non traité x40_DSP (15)	2.81565	7.21474	7.93996	7.21474	6.06349	2.63636	0.125945	0.125945	0.8998	5.33962	0.842262	0.0112	0.361667	2	42.5206	1.11504	0.00188659	0.201679	1.18405	1.74922
Phox2bKO_NT cre non traité x40_DSP (16)	2.48066	4.90598	0.969985	4.90598	1.79001	3.85326	1.03094	1.03094	1.05083	1.02436	0.506017	0.0184667	0.0666667	1.2	20.0951	1.21492	0.00409855	0.143029	1.42691	1.72195
Phox2bKO_NT cre non traité x40_DSP (17)	2.22988	3.67565	1.54379	3.67565	1.642	2.70548	0.647755	0.647755	0.943185	0.989177	0.49728	0.0102111	0.0366667	2	7.36105	1.11959	0.00209556	0.0737611	2.36487	3.72641
Phox2bKO_NT cre non traité x40_DSP (2)	2.64966	5.95972	4.45229	5.95972	2.50627	3.9693	0.224604	0.224604	1.05439	4.86262	0.829428	0.0203889	0.523333	1.15385	46.1399	1.23197	0.0041391	0.221464	2.17337	2.18462
Phox2bKO_NT cre non traité x40_DSP (3)	2.27015	3.8501	2.17838	3.8501	1.80757	2.96341	0.459058	0.459058	1.03483	2.07767	0.675079	0.00352222	0.0133333	1.33333	14.6542	0.966277	0.000573118	0.0561656	1.32025	2.96991
Phox2bKO_NT cre non traité x40_DSP (4)	2.62907	5.82009	1.5559	5.82009	2.00999	4.58333	0.642715	0.642715	1.11647	2.39266	0.705246	0.0133444	0.0733333	2	22.8111	1.1609	0.00267306	0.0816157	1.28106	1.40266
Phox2bKO_NT cre non traité x40_DSP (5)	2.95519	8.47206	15.7047	8.47206	3.93893	3.96715	0.0636753	0.0636753	0.92935	5.96809	0.856489	0.0145556	0.448333	1.2	66.9127	1.18638	0.0024066	0.0828868	4.23583	6.69868
Phox2bKO_NT cre non traité x40_DSP (6)	2.24818	3.75392	2.3773	3.75392	1.92946	2.35519	0.420645	0.420645	0.871483	1.38409	0.580553	0.0116556	0.17	1.33333	12.1445	1.1457	0.00239933	0.310294	2.32475	5.84785
Phox2bKO_NT cre non traité x40_DSP (7)	2.91216	8.06263	5.21955	8.06263	3.04169	4.91593	0.191587	0.191587	1.06338	5.29583	0.841165	0.0167889	0.386667	3.33333	41.6208	1.18899	0.00294711	0.253369	1.70845	1.7919
Phox2bKO_NT cre non traité x40_DSP (8)	2.07304	3.06843	0.694675	3.06843	1.48575	2.55372	1.43952	1.43952	1.01445	0.428319	0.299876	0.00896667	0.00666667	0	6.61157	1.09217	0.0019193	0	1.63576	2.85344
Phox2bKO_NT cre non traité x40_DSP (9)	2.64178	5.90592	5.974	5.90592	2.98747	3.34021	0.167392	0.167392	0.977548	4.80606	0.827766	0.0106444	0.29	1.44444	33.5044	1.12063	0.00189604	0.537721	2.26371	3.91122
WT_NT E1 WT NTx40-11 (1)	2.91712	8.1088	6.07746	8.1088	4.38495	3.98611	0.164542	0.164542	1.02938	3.17539	0.760502	0.0177222	0.525	1.71429	78.2061	1.20062	0.00299012	0.388712	2.1392	2.52654
WT_NT E1 WT NTx40-11 (10)	2.73275	6.558	13.4324	6.558	6.36086	2.42216	0.0744471	0.0744471	0.931512	3.96311	0.798514	0.0134556	0.5	1.125	41.7797	1.13801	0.00233786	0.40333	7.1975	7.28823
WT_NT E1 WT NTx40-11 (11)	2.4609	4.79564	2.95706	4.79564	2.02526	3.09677	0.338174	0.338174	0.918975	2.35673	0.702091	0.0127556	0.0916667	1	19.3859	1.14826	0.00255345	0.131991	2.80577	4.75108
WT_NT E1 WT NTx40-11 (12)	2.56778	5.42355	10.3544	5.42355	3.30424	3.10484	0.0965775	0.0965775	1.04062	3.66279	0.785536	0.00445556	0.15	2.5	20.8286	0.991967	0.000621929	0.254633	9.8068	9.81072
WT_NT E1 WT NTx40-11 (13)	2.5053	5.04714	5.31451	5.04714	2.59776	3.11043	0.188164	0.188164	0.993286	2.86058	0.740971	0.00892222	0.105	1.2	24.6067	1.11478	0.00159249	0.214656	5.53555	7.09885
WT_NT E1 WT NTx40-11 (14)	2.41765	4.56268	2.95646	4.56268	2.36814	2.89535	0.338242	0.338242	0.976528	1.9441	0.660338	0.0105333	0.0933333	2	15.9744	1.1377	0.00204737	0.165608	4.37911	5.08512
WT_NT E1 WT NTx40-11 (15)	2.57058	5.44108	3.9989	5.44108	2.74044	3.07143	0.250069	0.250069	0.93447	2.31333	0.698189	0.00552222	0.0433333	2	21.3141	0.991353	0.000874871	0.361642	4.30875	4.76326
WT_NT E1 WT NTx40-11 (17)	2.43187	4.63801	2.64044	4.63801	3.09751	2.41026	0.378724	0.378724	0.914614	1.37727	0.57935	0.00581111	0.0916667	0	17.5875	1.03672	0.000993957	0.0437269	3.94346	3.97643
WT_NT E1 WT NTx40-11 (18)	2.31956	4.07543	3.00409	4.07543	3.01407	2.34884	0.332879	0.332879	1.00059	1.86447	0.650895	0.00868889	0.138333	8	14.8703	1.07502	0.00158913	0.226166	2.00006	2.96651
WT_NT E1 WT NTx40-11 (2)	3.03532	9.29087	20.3769	9.29087	5.28643	3.95495	0.0490752	0.0490752	0.978737	7.07576	0.876173	0.0177667	2.22167	1	86.4411	1.20413	0.00286425	0.922582	3.07088	3.12486
WT_NT E1 WT NTx40-11 (21)	2.90347	7.98235	5.45698	7.98235	4.15539	4.14831	0.183251	0.183251	1.05937	3.73123	0.788638	0.0133	0.201667	2.33333	56.5265	1.14171	0.00219998	0.20438	1.24026	1.67339
WT_NT E1 WT NTx40-11 (22)	2.99012	8.81976	9.87986	8.81976	5.04247	4.06169	0.101216	0.101216	1.03412	4.40878	0.815116	0.0177889	0.935	1.18182	84.9724	1.20876	0.00291005	0.450553	1.98491	2.4271
WT_NT E1 WT NTx40-11 (23)	2.64151	5.90405	2.26561	5.90405	2.59961	3.45128	0.441382	0.441382	0.942508	1.22366	0.55029	0.0114889	0.121667	4.5	25.7311	1.15581	0.00218718	0.0439799	1.24386	4.69881
WT_NT E1 WT NTx40-11 (27)	2.24318	3.73236	2.97127	3.73236	2.88676	2.20438	0.336557	0.336557	1.00348	1.33632	0.571977	0.00578889	0.085	0	3.22483	1.05243	0.00103241	0.180637	4.39041	4.88236
WT_NT E1 WT NTx40-11 (28)	2.56726	5.42035	4.08246	5.42035	3.09461	3.11682	0.24495	0.24495	1.01155	3.05724	0.753527	0.0133889	0.308333	4.5	25.1112	1.14205	0.00253549	0.288076	2.02923	2.38181
WT_NT E1 WT NTx40-11 (29)	2.5929	5.58274	1.32449	5.58274	2.56173	3.54598	0.755008	0.755008	1.01661	0.983673	0.495885	0.0108	0.065	4	32.9378	1.16143	0.00201732	0.136083	1.04856	1.96597
WT_NT E1 WT NTx40-11 (3)	2.37691	4.35361	2.57024	4.35361	2.08434	3.12605	0.389068	0.389068	1.03664	1.97949	0.664372	0.00645556	0.0883333	1.33333	11.6295	1.08799	0.00115488	0.519831	3.39892	3.52988
WT_NT E1 WT NTx40-11 (30)	3.07304	9.70317	23.8425	9.70317	5.69756	3.79883	0.0419419	0.0419419	0.934504	8.82877	0.898258	0.0159444	1.20333	1.83333	86.5446	1.19044	0.00241285	0.638487	1.44017	4.42771
WT_NT E1 WT NTx40-11 (4)	2.78483	6.96319	7.57509	6.96319	5.0403	3.00794	0.132012	0.132012	0.969814	4.64671	0.822906	0.0104778	0.375	2.16667	36.3711	1.09951	0.00174404	0.237073	1.40008	1.41747
WT_NT E1 WT NTx40-11 (5)	2.17558	3.4529	3.77121	3.4529	1.77589	2.46212	0.265167	0.265167	0.95024	2.61538	0.723404	0.00783333	0.0433333	2	7.53725	1.06803	0.00152735	0.439213	5.3973	8.20289
WT_NT E1 WT NTx40-11 (6)	2.66613	6.07378	6.08438	6.07378	3.36611	3.2243	0.164355	0.164355	0.973959	2.93487	0.745862	0.0114111	0.411667	1.5	27.4478	1.15371	0.00202821	0.3136	1.73418	5.00242
WT_NT E1 WT NTx40-11 (7)	2.5288	5.18556	8.93496	5.18556	3.53903	2.54787	0.11192	0.11192	0.924323	2.65054	0.726068	0.00754444	0.305	4	23.2231	1.05685	0.00122451	0.8495	2.90639	8.04067
WT_NT E1 WT NTx40-11 (8)	2.53427	5.21833	5.86634	5.21833	3.3053	2.8534	0.170464	0.170464	0.994115	3.93182	0.797235	0.00964444	0.313333	4.5	17.1691	1.12969	0.00173165	0.169711	2.75638	2.75713
WT_NT E1 WT NTx40-11 (9)	2.75283	6.71137	8.17289	6.71137	3.35014	3.34599	0.122356	0.122356	0.912525	3.87281	0.794779	0.0123444	0.266667	2	48.5266	1.14572	0.00216464	0.429556	2.8365	5.06535
WT_NT E1 WT x40-1 (1)	2.32091	4.08181	4.73751	4.08181	2.87119	2.12057	0.211082	0.211082	0.880301	1.90476	0.655738	0.00474444	0.0483333	4	9.65714	0.994888	0.000800305	0.108211	5.07122	7.48266
WT_NT E1 WT x40-1 (3)	2.44313	4.69851	2.70405	4.69851	3.9387	2.30058	0.369816	0.369816	0.971748	1.02482	0.50613	0.00634444	0.0366667	0	14.6194	1.02331	0.00101509	0.172547	1.9952	2.07936
WT_NT E1 WT x40-1 (4)	2.6996	6.31239	16.8321	6.31239	5.24255	2.28105	0.0594101	0.0594101	0.827392	4.09424	0.8037	0.0108111	0.66	3.33333	36.9565	1.14973	0.00174338	0.330063	2.4921	9.45931
WT_NT E1 WT x40-1 (5)	2.33347	4.14124	2.68701	4.14124	2.36239	2.61635	0.372161	0.372161	0.97105	1.27479	0.560399	0.00892222	0.0683333	4.5	14.58	1.07176	0.00165713	0.291002	1.08801	6.55276
WT_NT E1 WT x40-1 (6)	2.32258	4.08966	5.74203	4.08966	2.74175	2.22297	0.174154	0.174154	0.900037	3.18699	0.761165	0.00572222	0.173333	4	13.5944	1.02687	0.000923383	0.655077	2.11925	2.81259
WT_NT E1 WTNT x40-1 (10)	2.96031	8.52215	8.42222	8.52215	6.36553	3.34111	0.118734	0.118734	0.989142	2.54433	0.71786	0.0159889	0.946667	2.55556	78.0794	1.1816	0.00256108	0.330308	1.75402	2.59306
WT_NT E1 WTNT x40-1 (11)	2.89224	7.87976	7.50316	7.87976	4.47753	3.63838	0.133277	0.133277	0.977043	3.32639	0.76886	0.0138444	0.44	1.71429	58.1378	1.14753	0.00230145	0.42115	2.3361	4.11269
WT_NT E1 WTNT x40-1 (12)	2.67079	6.10644	16.995	6.10644	5.09934	2.63366	0.058841	0.058841	0.973933	6.45679	0.865894	0.00671111	0.27	4	23.1358	1.03349	0.00100145	0.521079	2.17621	2.28306
WT_NT E1 WTNT x40-1 (13)	3.07018	9.67133	33.9172	9.67133	6.79104	3.41033	0.0294836	0.0294836	0.91892	7.2716	0.879104	0.0148889	1.02	2.18182	88.017	1.18689	0.00215265	0.525471	3.42876	6.4132
WT_NT E1 WTNT x40-1 (14)	2.55956	5.37249	10.5753	5.37249	3.58521	2.46789	0.0945603	0.0945603	0.869776	1.93382	0.659148	0.00886667	0.526667	5.5	21.3612	1.11987	0.00146411	0.97204	6.6182	15.1164
WT_NT E1 WTNT x40-1 (15)	2.56848	5.42793	10.6275	5.42793	3.48724	2.56744	0.0940954	0.0940954	0.883298	3.37766	0.771567	0.00914444	0.351667	1.25	19.7543	1.07461	0.00158941	0.839487	1.35712	7.80703
WT_NT E1 WTNT x40-1 (16)	2.16202	3.39944	4.62866	3.39944	2.14542	1.875	0.216045	0.216045	0.807886	1.71351	0.631474	0.00557778	0.128333	2	11.7382	1.0139	0.000978709	0.522406	5.80196	14.4844
WT_NT E1 WTNT x40-1 (17)	2.78034	6.92729	23.2822	6.92729	7.36205	2.59328	0.0429513	0.0429513	1.01575	8.31395	0.892634	0.0089	0.375	8.5	31.8895	1.11634	0.001305	0.474045	1.64827	1.77851
WT_NT E1 WTNT x40-1 (18)	3.0413	9.35503	15.2846	9.35503	7.91105	3.09091	0.0654252	0.0654252	0.929304	3.97924	0.799166	0.0159889	1.25167	2.08333	78.2609	1.19698	0.00246908	0.351706	2.03858	2.10369
WT_NT E1 WTNT x40-1 (19)	2.66472	6.06397	5.08653	6.06397	3.90781	3.14079	0.196598	0.196598	1.02388	3.5124	0.778388	0.0182	0.611667	1	66.4165	1.22481	0.00335067	0.233098	1.95065	2.31268
WT_NT E1 WTNT x40-1 (2)	2.69435	6.27437	19.5272	6.27437	3.2425	2.996	0.0512106	0.0512106	0.859828	6.66216	0.869489	0.0126	0.748333	1.77778	32.86	1.15554	0.00220335	0.489754	9.85234	15.5971
WT_NT E1 WTNT x40-1 (20)	2.77166	6.85841	18.1532	6.85841	4.54822	2.94704	0.0550867	0.0550867	0.916396	5.72889	0.851387	0.0168222	0.835	2.57143	49.6579	1.18094	0.00288932	0.437659	9.15224	9.62269
WT_NT E1 WTNT x40-1 (21)	2.72454	6.49628	15.0739	6.49628	3.70751	3.16872	0.06634	0.06634	0.939206	4.94681	0.831843	0.0124222	0.488333	1.57143	35.2269	1.13764	0.00207624	0.601132	8.6958	8.88719
WT_NT E1 WTNT x40-1 (22)	2.50385	5.03871	16.0267	5.03871	4.5599	2.16157	0.0623961	0.0623961	0.916068	6.91753	0.873698	0.00853333	0.161667	6	15.8107	1.06276	0.0014213	0.434514	2.81914	4.25819
WT_NT E1 WTNT x40-1 (23)	2.34757	4.209	1.15065	4.209	2.48506	2.59135	0.869073	0.869073	0.970544	0.744652	0.42682	0.0145	0.055	4	12.6679	1.16519	0.00304299	0.0276818	2.05318	2.13295
WT_NT E1 WTNT x40-1 (24)	2.71849	6.45117	5.57086	6.45117	2.97868	3.44747	0.179505	0.179505	0.922304	3.35072	0.770153	0.0166778	0.2	1.8	35.2976	1.19977	0.00317105	0.233731	4.28433	4.48995
WT_NT E1 WTNT x40-1 (25)	2.55469	5.34245	4.92803	5.34245	2.69021	3.24096	0.202921	0.202921	0.995008	2.97537	0.748451	0.00896667	0.245	2	22.6639	1.11331	0.00156382	0.268088	2.76471	3.0052
WT_NT E1 WTNT x40-1 (26)	2.85609	7.55855	11.4093	7.55855	5.10998	3.48905	0.0876479	0.0876479	1.04347	8.36029	0.893166	0.0141444	0.556667	2.85714	56.2964	1.16328	0.00233921	0.381216	1.2548	1.54257
WT_NT E1 WTNT x40-1 (27)	2.50119	5.02333	3.1756	5.02333	3.66777	2.54651	0.314901	0.314901	0.970857	1.57447	0.61157	0.00672222	0.128333	4	16.8676	1.02378	0.00110342	0.43976	1.41739	1.52436
WT_NT E1 WTNT x40-1 (28)	2.45076	4.73998	2.4789	4.73998	2.3581	3.00781	0.403405	0.403405	0.97444	1.57353	0.611429	0.00583333	0.0783333	1	16.1495	0.997517	0.00097869	0.246885	2.89618	3.39891
WT_NT E1 WTNT x40-1 (29)	2.23215	3.68527	1.45387	3.68527	1.8151	2.53465	0.687818	0.687818	0.926616	1.64828	0.622396	0.00426667	0.005	1.5	9.64017	1.00177	0.000743202	0.183995	1.08723	1.67203
WT_NT E1 WTNT x40-1 (3)	2.60455	5.65809	3.51179	5.65809	5.78261	2.036	0.284755	0.284755	0.865306	1.26761	0.559006	0.00715556	0.128333	8	22.5	1.04328	0.00112399	0.249222	1.41266	1.46739
WT_NT E1 WTNT x40-1 (30)	2.15176	3.35952	3.09018	3.35952	2.59339	1.91489	0.323606	0.323606	0.917912	1.9711	0.663424	0.00571111	0.108333	8	10.2082	1.0252	0.00103048	0.37686	2.57093	4.68043
WT_NT E1 WTNT x40-1 (31)	2.42356	4.59383	3.24441	4.59383	3.25141	2.20455	0.308222	0.308222	0.865326	1.23426	0.552424	0.00985556	0.115	3.5	19.202	1.08792	0.00185773	0.121063	2.06373	7.15036
WT_NT E1 WTNT x40-1 (32)	2.37041	4.32116	3.51898	4.32116	2.71954	2.51462	0.284174	0.284174	0.959666	2.33898	0.700508	0.00875556	0.113333	6	11.5942	1.0583	0.00162761	0.191839	1.96925	3.312
WT_NT E1 WTNT x40-1 (33)	2.47951	4.89949	2.04321	4.89949	2.22198	3.19212	0.489427	0.489427	0.971178	1.48128	0.596983	0.0154667	0.16	3.5	17.3285	1.18241	0.00321244	0.239732	1.49172	3.05687
WT_NT E1 WTNT x40-1 (34)	2.74211	6.62903	5.81093	6.62903	4.08045	3.58577	0.172089	0.172089	1.09266	4.54167	0.819549	0.0147778	0.22	1.4	64.4266	1.15871	0.0024832	0.219363	1.25048	1.40241
WT_NT E1 WTNT x40-1 (36)	2.49625	4.99485	1.43557	4.99485	2.17874	3.20305	0.696587	0.696587	0.946549	0.619898	0.382677	0.0141111	0.158333	3.33333	18.57	1.18731	0.00289348	0.101174	1.50032	4.34142
WT_NT E1 WTNT x40-1 (37)	2.46432	4.81454	5.09624	4.81454	2.0932	2.7783	0.196223	0.196223	0.834892	2.55522	0.718724	0.0132333	0.25	1.2	20.9766	1.1714	0.0025315	0.129586	2.47664	8.41031
WT_NT E1 WTNT x40-1 (38)	2.67387	6.12818	6.0426	6.12818	2.71804	3.87633	0.165492	0.165492	1.04284	3.66179	0.78549	0.0283333	0.526667	1.1	33.2322	1.28265	0.00596748	0.0990148	3.74565	5.24088
WT_NT E1 WTNT x40-1 (39)	2.4262	4.60781	6.79281	4.60781	3.49738	2.34132	0.147214	0.147214	0.950249	3.00699	0.750436	0.00636667	0.16	10	12.393	1.08225	0.00104333	0.213015	1.49856	4.71702
WT_NT E1 WTNT x40-1 (4)	2.59536	5.59852	26.1887	5.59852	4.55252	2.12014	0.0381844	0.0381844	0.808011	6.87931	0.873085	0.0101556	0.263333	3.33333	37.9398	1.12106	0.00159699	0.29585	3.26613	10.927
WT_NT E1 WTNT x40-1 (40)	2.97767	8.69419	23.0481	8.69419	5.35901	4.05366	0.0433875	0.0433875	1.07935	8.56579	0.895461	0.00807778	0.485	2	54.2919	1.0749	0.00108552	0.482143	3.15214	3.21782
WT_NT E1 WTNT x40-1 (41)	2.89873	7.93886	37.1317	7.93886	6.28826	2.79379	0.0269312	0.0269312	0.882471	7.88489	0.887449	0.0137222	0.803333	2.57143	57.4827	1.15353	0.00209929	0.407421	4.37518	8.82788
WT_NT E1 WTNT x40-1 (42)	2.8678	7.66113	11.0373	7.66113	7.01215	2.79795	0.0906018	0.0906018	0.967102	3.54774	0.78011	0.0100556	0.398333	3.14286	58.3697	1.10721	0.00151686	0.267999	1.30402	4.5217
WT_NT E1 WTNT x40-1 (43)	2.77936	6.91948	9.44944	6.91948	3.80851	2.97967	0.105826	0.105826	0.840375	2.89956	0.743561	0.00992222	0.228333	1.83333	43.5241	1.146	0.00162028	0.211643	1.27306	9.04313
WT_NT E1 WTNT x40-1 (44)	2.78258	6.94522	29.1959	6.94522	4.65599	2.55333	0.0342513	0.0342513	0.793282	6.50388	0.866736	0.0107556	0.766667	1.6	63.0513	1.13534	0.00164491	0.28748	1.50612	19.7139
WT_NT E1 WTNT x40-1 (45)	3.07175	9.68883	27.1977	9.68883	5.286	4.15135	0.0367679	0.0367679	0.985103	8.17431	0.891	0.0222222	1.525	1.61111	70.7211	1.24791	0.00378221	0.502494	5.334	8.7607
WT_NT E1 WTNT x40-1 (47)	2.72307	6.48527	2.54595	6.48527	3.23966	3.33191	0.39278	0.39278	0.924731	1.38193	0.580172	0.0128889	0.358333	3.5	39.4785	1.14241	0.00239915	0.131306	1.78622	3.06906
WT_NT E1 WTNT x40-1 (48)	2.74751	6.67036	11.7045	6.67036	4.04918	3.02632	0.0854375	0.0854375	0.912953	3.93191	0.797239	0.0128778	0.578333	2	39.8961	1.15332	0.00218618	0.34381	6.12235	6.86821
WT_NT E1 WTNT x40-1 (49)	2.76007	6.7675	5.17711	6.7675	4.95424	3.04706	0.193158	0.193158	1.00217	3.28163	0.766444	0.0116556	0.248333	1.83333	43.4938	1.15088	0.0019013	0.154377	1.27336	1.31208
WT_NT E1 WTNT x40-1 (5)	2.86507	7.63712	8.9111	7.63712	3.74248	3.94737	0.11222	0.11222	0.999903	3.98846	0.799537	0.0144111	0.681667	2.125	39.3481	1.18298	0.00250035	0.521696	5.39993	6.15973
WT_NT E1 WTNT x40-1 (50)	2.81518	7.21086	4.36357	7.21086	3.74097	3.82573	0.22917	0.22917	1.02617	3.29373	0.767102	0.0144556	0.5	1.85714	38.493	1.17831	0.0025745	0.409345	1.12873	1.82359
WT_NT E1 WTNT x40-1 (51)	2.37521	4.34512	1.30636	4.34512	2.413	2.66492	0.765488	0.765488	0.952713	1.30867	0.56685	0.0121333	0.0383333	1.25	15.5153	1.13667	0.00243405	0.121046	1.39936	1.5566
WT_NT E1 WTNT x40-1 (52)	2.49936	5.01274	6.8143	5.01274	3.87056	2.40175	0.14675	0.14675	0.942626	2.8629	0.741127	0.0106444	0.293333	2	14.3676	1.08349	0.00200174	0.717366	4.55639	6.2669
WT_NT E1 WTNT x40-1 (53)	2.66741	6.08277	5.79972	6.08277	3.38786	3.445	0.172422	0.172422	1.04244	4.97076	0.832517	0.0113444	0.331667	2	23.3894	1.11193	0.00200506	0.159578	1.64632	2.11593
WT_NT E1 WTNT x40-1 (54)	2.62012	5.76041	3.75588	5.76041	3.38275	2.98295	0.266249	0.266249	0.952419	1.69796	0.629349	0.00734444	0.22	1.6	25.0096	1.03089	0.00119804	0.491993	3.12736	3.13164
WT_NT E1 WTNT x40-1 (55)	2.41142	4.5301	6.42599	4.5301	2.74112	2.66667	0.155618	0.155618	0.974597	2.33898	0.700508	0.0109444	0.546667	6	13.9188	1.09475	0.002041	0.698802	6.82816	11.6525
WT_NT E1 WTNT x40-1 (56)	2.40319	4.48733	1.02116	4.48733	2.05079	3.19608	0.97928	0.97928	1.01998	1.27163	0.559788	0.0105	0.045	4	17.0605	1.10494	0.00208883	0.234577	1.19821	1.22713
WT_NT E1 WTNT x40-1 (57)	2.64656	5.93849	6.47284	5.93849	3.70213	3.08571	0.154492	0.154492	0.999782	3.27273	0.765957	0.00731111	0.0816667	2	25.3353	1.05095	0.0011602	0.19878	1.24825	3.90658
WT_NT E1 WTNT x40-1 (58)	2.08696	3.11799	2.4028	3.11799	1.51467	2.36691	0.41618	0.41618	0.934257	1.69301	0.628668	0.00984444	0.0366667	1	4.85458	1.11443	0.00204884	0.100787	7.86808	7.86963
WT_NT E1 WTNT x40-1 (59)	2.6404	5.89654	18.0388	5.89654	3.74091	2.20082	0.0554359	0.0554359	0.721898	2.3	0.69697	0.00733333	0.568333	3.5	37.8783	1.03858	0.00106487	0.798673	28.8059	31.0306
WT_NT E1 WTNT x40-1 (6)	2.08051	3.09493	2.0333	3.09493	1.68085	2.45679	0.491812	0.491812	1.02916	1.28472	0.56231	0.00365556	0.02	0	2.61622	0.921801	0.000645944	0.155936	3.41472	5.49182
WT_NT E1 WTNT x40-1 (60)	2.64336	5.91667	3.01801	5.91667	3.1552	3.24528	0.331344	0.331344	0.974292	2.22156	0.689591	0.0119556	0.146667	2	21.058	1.13073	0.00220885	0.221938	1.4395	2.04229
WT_NT E1 WTNT x40-1 (61)	2.4915	4.96761	11.0926	4.96761	4.68254	1.91342	0.0901505	0.0901505	0.833497	2.81818	0.738095	0.007	0.14	3.5	23.7097	1.04566	0.00110233	0.0796819	2.71628	6.81079
WT_NT E1 WTNT x40-1 (62)	2.60766	5.67838	10.3351	5.67838	2.8675	3.11561	0.0967576	0.0967576	0.929117	4.51538	0.818689	0.00796667	0.126667	1.16667	26.1942	1.04671	0.00132167	0.32126	8.49426	8.84467
WT_NT E1 WTNT x40-1 (63)	2.71213	6.40411	4.55689	6.40411	4.67888	2.86149	0.219448	0.219448	0.966504	2.14932	0.682471	0.0154667	0.861667	1.9	61.6463	1.19184	0.00275255	0.24711	1.48289	2.43885
WT_NT E1 WTNT x40-1 (64)	2.51729	5.11729	5.93249	5.11729	2.77479	2.97531	0.168563	0.168563	0.968517	3.58442	0.78187	0.00784444	0.236667	2.66667	16.3496	1.0906	0.00137084	0.595069	2.00994	4.79133
WT_NT E1 WTNT x40-1 (65)	2.52168	5.14324	9.33196	5.14324	5.45385	1.77994	0.107159	0.107159	0.8082	1.92605	0.658242	0.0101111	0.296667	2.25	27.3523	1.08281	0.00173038	0.501646	3.18694	12.0463
WT_NT E1 WTNT x40-1 (66)	2.6543	5.99164	6.62809	5.99164	3.40707	3.03865	0.150873	0.150873	0.936106	2.48016	0.712657	0.00974444	0.443333	1.25	38.9376	1.10551	0.00165339	0.438979	5.41739	5.6893
WT_NT E1 WTNT x40-1 (67)	2.92795	8.21053	7.23301	8.21053	5.88278	3.72424	0.138255	0.138255	1.10017	3.31719	0.768368	0.0198111	0.8	3.5	59.2883	1.22489	0.00333196	0.614829	1.16984	1.87327
WT_NT E1 WTNT x40-1 (68)	2.71394	6.4175	4.38093	6.4175	3.82037	3.58049	0.228262	0.228262	1.09051	2.39088	0.705091	0.0115667	0.403333	8	31.064	1.12093	0.00200659	0.319101	1.1426	2.29791
WT_NT E1 WTNT x40-1 (69)	2.56255	5.39098	7.57602	5.39098	2.69105	3.2766	0.131995	0.131995	0.997047	4.30102	0.811357	0.0115444	0.421667	1.25	24.2574	1.10954	0.00212133	0.511654	5.58058	5.59973
WT_NT E1 WTNT x40-1 (7)	2.28168	3.90155	1.37274	3.90155	1.9839	2.6371	0.728468	0.728468	0.952026	0.882155	0.468694	0.00621111	0.0216667	6	8.79389	1.034	0.00112818	0.13375	1.23904	2.1883
WT_NT E1 WTNT x40-1 (70)	2.58116	5.50774	8.60663	5.50774	2.91928	3.09816	0.11619	0.11619	0.9611	4.10687	0.804185	0.00743333	0.25	1.6	22.9015	1.04777	0.00123551	0.634108	5.73833	6.05899
WT_NT E1 WTNT x40-1 (71)	2.19074	3.51372	0.971718	3.51372	1.83958	2.56338	1.0291	1.0291	0.989475	0.599251	0.374707	0.00948889	0.025	1.5	14.0281	1.10625	0.00193857	0.0765167	2.94204	3.08642
WT_NT E1 WTNT x40-1 (72)	2.75583	6.73458	8.91528	6.73458	6.03313	2.56747	0.112167	0.112167	0.936412	2.30822	0.697723	0.0107333	0.803333	0	30.3398	1.10106	0.00177777	0.335911	2.36365	2.60102
WT_NT E1 WTNT x40-1 (73)	2.31866	4.07125	8.7864	4.07125	2.42523	1.76166	0.113812	0.113812	0.673861	1.42358	0.587387	0.00616667	0.258333	0	11.7914	1.02508	0.00101354	0.212238	10.28	40.3866
WT_NT E1 WTNT x40-1 (74)	2.69662	6.29081	13.8356	6.29081	5.63579	2.37121	0.0722772	0.0722772	0.894832	3.19149	0.761421	0.00875556	0.463333	2.5	29.9267	1.08941	0.0013809	1.02816	2.17303	5.94248
WT_NT E1 WTNT x40-1 (75)	2.87829	7.75425	14.4305	7.75425	3.92481	3.59615	0.0692977	0.0692977	0.918771	5.25405	0.840104	0.0128556	0.565	2.5	44.5103	1.14188	0.00207134	0.354011	1.54114	5.55435
WT_NT E1 WTNT x40-1 (76)	2.76643	6.81723	9.66146	6.81723	3.02832	3.55682	0.103504	0.103504	0.907934	4.20155	0.80775	0.00745556	0.235	2.75	34.1255	1.08348	0.00111279	0.540464	1.61291	6.71821
WT_NT E1 WTNT x40-1 (77)	2.6371	5.87415	13.2242	5.87415	3.01642	2.57078	0.0756191	0.0756191	0.76009	3.3	0.767442	0.00812222	0.258333	4	22.7611	1.06634	0.00131111	0.79413	10.0054	20.1255
WT_NT E1 WTNT x40-1 (78)	2.78432	6.95914	4.48907	6.95914	3.56728	3.58159	0.222763	0.222763	0.97205	2.67073	0.727575	0.0133778	0.28	2.25	34.96	1.14462	0.00241482	0.337324	3.17831	3.75134
WT_NT E1 WTNT x40-1 (79)	2.35571	4.24864	3.99624	4.24864	2.66874	2.45185	0.250235	0.250235	0.942752	2.03774	0.670807	0.00536667	0.095	1.5	17.3611	1.00787	0.000910263	0.412034	2.12225	5.15357
WT_NT E1 WTNT x40-1 (8)	2.8845	7.8099	16.7758	7.8099	8.63128	2.69231	0.0596095	0.0596095	1.01278	3.74621	0.789306	0.0139222	1.40667	2.57143	62.1881	1.16321	0.0021414	0.750632	2.66134	2.67491
WT_NT E1 WTNT x40-1 (80)	2.08551	3.11278	1.41822	3.11278	1.75494	2.33846	0.705107	0.705107	0.995208	0.85122	0.459816	0.00843333	0.0116667	1.5	5.80229	1.07546	0.00173477	0.22079	2.04448	4.71574
WT_NT E1 WTNT x40-1 (81)	2.52401	5.15703	2.82998	5.15703	2.7191	2.97917	0.35336	0.35336	0.952594	1.73464	0.634321	0.0108778	0.095	3.5	19.8406	1.10877	0.00203079	0.162965	2.91627	3.90139
WT_NT E1 WTNT x40-1 (82)	2.58434	5.52798	11.2956	5.52798	6.83275	2.0035	0.0885297	0.0885297	0.94737	4.55195	0.819883	0.0095	0.426667	2.75	28.7646	1.12316	0.00157962	0.95819	1.00998	6.85212
WT_NT E1 WTNT x40-1 (83)	2.65639	6.00605	4.64026	6.00605	3.44098	3.0582	0.215505	0.215505	0.944534	2.7602	0.734057	0.00818889	0.15	3.5	21.9612	1.07284	0.00134824	0.429572	2.01177	2.34511
WT_NT E1 WTNT x40-1 (84)	1.83272	2.32678	0.705306	2.32678	1.17121	2.42857	1.41782	1.41782	1.12957	0.668831	0.400778	0.00571111	0.005	0	1.40291	1.03395	0.00117684	0.0623783	2.44802	2.49211
WT_NT E1 WTNT x40-1 (85)	2.58173	5.5114	4.67015	5.5114	4.137	2.48182	0.214126	0.214126	0.915906	2.03891	0.670935	0.00867778	0.361667	10	16.8626	1.05746	0.00150382	0.22631	1.92013	4.02272
WT_NT E1 WTNT x40-1 (86)	2.96784	8.59635	8.59474	8.59635	4.54405	3.88	0.11635	0.11635	0.962141	3.49084	0.777325	0.0136222	0.433333	3.75	51.7146	1.17195	0.00218796	0.291254	2.43889	2.55895
WT_NT E1 WTNT x40-1 (87)	2.20368	3.56643	3.52088	3.56643	1.65808	2.19424	0.28402	0.28402	0.792235	1.50862	0.601375	0.00646667	0.0983333	0	8.33143	1.00983	0.00117642	0.117242	12.4621	13.9736
WT_NT E1 WTNT x40-1 (88)	2.21416	3.60973	1.62669	3.60973	1.97158	2.65672	0.614745	0.614745	1.03342	2	0.666667	0.0086	0.0183333	3	11.4903	1.08858	0.00173797	0.101666	1.27552	2.16077
WT_NT E1 WTNT x40-1 (89)	2.69414	6.27282	5.29826	6.27282	3.91656	3.1658	0.188741	0.188741	0.998788	4	0.8	0.00838889	0.07	2.5	41.3311	1.0857	0.0013898	0.0363937	1.41501	2.08894
WT_NT E1 WTNT x40-1 (9)	2.93506	8.27799	6.15862	8.27799	4.06217	3.68506	0.162374	0.162374	0.89722	3.37427	0.77139	0.0166222	0.673333	2.5	56.7903	1.19428	0.0028717	0.131832	2.12207	2.83258
WT_NT E1 WTNT x40-1 (90)	2.46586	4.82307	3.14023	4.82307	2.81951	2.82667	0.318448	0.318448	0.984098	1.42126	0.586992	0.00683333	0.105	6	13.964	1.06313	0.0011624	0.14539	3.34391	4.86711
WT_NT E1 WTNT x40-1 (91)	2.48195	4.91328	6.10269	4.91328	3.68444	2.45581	0.163862	0.163862	0.959423	2.46792	0.711643	0.0102111	0.378333	2.25	20.5749	1.10676	0.00177275	0.350656	3.74685	4.72689
WT_NT E1 WTNT x40-1 (92)	2.70024	6.31705	5.87722	6.31705	3.97607	2.86818	0.170148	0.170148	0.905356	2.67593	0.72796	0.00882222	0.225	5	26.6021	1.07718	0.00147693	0.462716	3.0096	3.48115
WT_NT E1 WTNT x40-1 (93)	2.11616	3.22461	2.99359	3.22461	2.51235	2.03226	0.334047	0.334047	0.998944	1.44221	0.590535	0.0054	0.0266667	0	4.02787	0.996526	0.000922677	0.163551	1.44096	2.37306
WT_NT E1 WTNT x40-1 (94)	2.69461	6.27628	5.84528	6.27628	3.55046	3.31818	0.171078	0.171078	0.996186	2.40625	0.706422	0.00968889	0.208333	1.57143	48.026	1.10321	0.00163355	0.107088	1.02257	7.59886
WT_NT E1 WTNT x40-1 (95)	2.3213	4.08362	2.82234	4.08362	2.53811	2.35359	0.354316	0.354316	0.918206	1.53216	0.605081	0.00962222	0.0383333	0	8.56679	1.12003	0.00181214	0.107459	3.17622	4.33385
WT_NT E1 WTNT x40-1 (96)	2.57651	5.47834	5.13429	5.47834	3.13913	3.02747	0.194769	0.194769	0.979121	2.72685	0.731677	0.00894444	0.213333	3	30.0323	1.08878	0.00149287	0.479389	1.73441	2.47349
WT_NT E1 WTNT x40-1 (97)	2.41555	4.55164	2.70292	4.55164	2.27926	2.87273	0.369971	0.369971	0.952847	1.31989	0.568946	0.00958889	0.05	2	19.5601	1.08861	0.00179312	0.20706	1.01389	6.83916
WT_NT E1 WTNT x40-1 (99)	2.73535	6.57761	7.16701	6.57761	3.60455	3.61712	0.139528	0.139528	1.04405	3.65098	0.784992	0.0131778	0.463333	1.09091	45.5811	1.15324	0.00239781	0.533846	4.66206	5.21038
WT_NT E4 WT NTx40-9 (1)	2.30115	3.98999	4.38475	3.98999	2.1727	2.21637	0.228063	0.228063	0.818787	1.9187	0.657382	0.00797778	0.113333	4	9.51059	1.0497	0.00144698	0.190294	3.16882	7.59693
WT_NT E4 WT NTx40-9 (10)	2.78211	6.94145	11.6258	6.94145	5.07469	2.65278	0.0860153	0.0860153	0.860906	2.81028	0.737552	0.0107111	0.421667	6.5	29.571	1.1283	0.00172226	0.360095	3.15863	6.5042
WT_NT E4 WT NTx40-9 (11)	2.53252	5.20782	12.7902	5.20782	3.72381	2.56364	0.078185	0.078185	0.949936	3.06977	0.754286	0.00583333	0.18	6	14.2045	1.03243	0.000890697	1.14559	5.49619	12.3119
WT_NT E4 WT NTx40-9 (12)	2.68466	6.20479	9.42602	6.20479	6.35185	2.51406	0.106089	0.106089	1.02117	2.34711	0.701235	0.009	0.466667	12	19.4102	1.10774	0.00146508	0.747011	3.22078	3.24527
WT_NT E4 WT NTx40-9 (13)	1.89165	2.49012	0.983223	2.49012	1.4918	1.78899	1.01706	1.01706	0.877494	0.465465	0.317623	0.00542222	0.005	0	5.42581	1.0459	0.00105091	0.101222	1.76443	3.86993
WT_NT E4 WT NTx40-9 (14)	2.57923	5.49551	4.82481	5.49551	3.87984	2.76613	0.207262	0.207262	0.99145	2.57349	0.720161	0.0137778	0.226667	1.6	25.8723	1.1663	0.00261299	0.505614	1.74639	1.76805
WT_NT E4 WT NTx40-9 (15)	2.2535	3.777	2.03604	3.777	1.95732	2.76316	0.49115	0.49115	1.0235	1.47859	0.596545	0.0109333	0.166667	1.5	7.64736	1.13096	0.00225583	0.31397	2.48508	4.68581
WT_NT E4 WT NTx40-9 (16)	2.14766	3.34369	2.91258	3.34369	1.69469	2.15385	0.343338	0.343338	0.838559	1.16268	0.537611	0.00502222	0.03	0	6.58436	1.03056	0.000878788	0.472706	2.19286	10.0832
WT_NT E4 WT NTx40-9 (17)	2.75661	6.7406	14.92	6.7406	5.09535	2.66561	0.0670243	0.0670243	0.892657	5.04433	0.834556	0.0136333	0.323333	2.8	40.6406	1.14527	0.00223083	0.191507	2.40706	2.77656
WT_NT E4 WT NTx40-9 (18)	2.61884	5.75198	8.70923	5.75198	4.35928	2.2913	0.114821	0.114821	0.831712	2.4433	0.709581	0.00742222	0.226667	8	25.5274	1.04525	0.00117373	0.356715	4.93974	6.1036
WT_NT E4 WT NTx40-9 (19)	2.71961	6.45954	30.227	6.45954	5.3839	2.44538	0.033083	0.033083	0.878401	3.25	0.764706	0.00717778	0.456667	5.5	22.3178	1.04403	0.00105355	0.897192	16.5413	16.6922
WT_NT E4 WT NTx40-9 (2)	2.33152	4.13194	2.23995	4.13194	2.57348	2.47143	0.446439	0.446439	0.95952	2.18857	0.68638	0.0062	0.0583333	6	2.67363	1.0335	0.00109923	0.322401	1.11388	1.13685
WT_NT E4 WT NTx40-9 (20)	2.79696	7.06117	6.8196	7.06117	5.86475	2.8231	0.146636	0.146636	0.968222	2.85771	0.740779	0.0108444	0.476667	4	38.574	1.13116	0.00171817	0.729923	1.20573	2.08625
WT_NT E4 WT NTx40-9 (21)	3.00139	8.93495	12.965	8.93495	7.5834	2.96477	0.0771307	0.0771307	0.913757	3.05782	0.753562	0.0132556	0.501667	6.75	53.3493	1.15826	0.00198332	0.313165	1.15478	4.08723
WT_NT E4 WT NTx40-9 (22)	2.80256	7.10682	7.63762	7.10682	4.76173	3.54545	0.130931	0.130931	1.08863	3.32	0.768519	0.018	0.48	1.7	51.8201	1.20113	0.00317985	0.373505	2.64878	3.40967
WT_NT E4 WT NTx40-9 (23)	2.76224	6.78444	4.47865	6.78444	5.15685	2.94946	0.223282	0.223282	0.987234	2.17033	0.684575	0.0128222	0.191667	3.5	28.1025	1.1442	0.00222406	0.106137	1.53993	1.53994
WT_NT E4 WT NTx40-9 (24)	2.69178	6.25585	11.0135	6.25585	3.89746	2.52174	0.0907979	0.0907979	0.795802	1.77465	0.639594	0.0109444	0.92	6.5	34.3	1.12406	0.00184045	0.716024	17.067	25.1383
WT_NT E4 WT NTx40-9 (25)	2.34272	4.18556	4.06659	4.18556	3.0616	2.10753	0.245906	0.245906	0.881037	1.65399	0.623209	0.00775556	0.285	8	9.12414	1.07903	0.00144715	0.203831	2.22409	5.99513
WT_NT E4 WT NTx40-9 (26)	2.90825	8.0264	13.0629	8.0264	5.50246	3.53381	0.0765528	0.0765528	1.03276	5.09	0.835796	0.0135333	0.705	3.83333	35.4617	1.1606	0.00210313	0.373595	1.37325	2.37135
WT_NT E4 WT NTx40-9 (27)	2.13193	3.28367	4.50275	3.28367	1.79684	2.37864	0.222086	0.222086	0.971011	1.6213	0.61851	0.00492222	0.125	2	3.73723	0.982832	0.000854529	0.438034	22.0577	22.0598
WT_NT E4 WT NTx40-9 (28)	2.20984	3.59182	1.38359	3.59182	1.80455	2.9	0.722756	0.722756	1.0846	1.06925	0.516734	0.0083	0.085	2	9.6399	1.12866	0.0016117	0.331319	1.21935	2.14854
WT_NT E4 WT NTx40-9 (29)	2.62191	5.7723	8.26035	5.7723	4.22917	2.79295	0.12106	0.12106	0.995044	4.16129	0.80625	0.0106667	0.503333	2	29.4587	1.14275	0.0017455	0.866025	1.03901	2.01882
WT_NT E4 WT NTx40-9 (3)	2.75462	6.72518	9.41261	6.72518	4.48913	2.88235	0.106241	0.106241	0.90808	2.94286	0.746377	0.0092	0.275	4	37.8786	1.11016	0.00144474	0.419915	5.10799	7.66053
WT_NT E4 WT NTx40-9 (30)	2.45454	4.76064	7.24884	4.76064	6.2525	1.69231	0.137953	0.137953	0.888875	3.36408	0.770857	0.00998889	0.118333	2.5	12.7504	1.10301	0.00186355	0.0943333	1.00417	2.37302
WT_NT E4 WT NTx40-9 (31)	2.82615	7.30244	15.7205	7.30244	5.9061	2.93993	0.0636113	0.0636113	0.978406	4.61413	0.821878	0.0114778	1.14667	3.75	40.3121	1.13541	0.00174389	0.895833	1.36471	2.52321
WT_NT E4 WT NTx40-9 (32)	2.86595	7.64489	11.3636	7.64489	4.04388	3.37261	0.0880003	0.0880003	0.887143	3.64134	0.784545	0.0169667	0.693333	1.3	43.7738	1.21262	0.00301294	0.372605	1.30382	12.6682
WT_NT E4 WT NTx40-9 (33)	2.42091	4.57984	2.12183	4.57984	2.20744	3.2193	0.471292	0.471292	1.04437	1.93678	0.659491	0.00567778	0.0116667	1.5	14.1276	1.02084	0.000971363	0.312806	1.83055	2.23883
WT_NT E4 WT NTx40-9 (34)	2.44108	4.68742	5.50965	4.68742	2.08543	3.05263	0.1815	0.1815	0.940455	2.43103	0.708543	0.00663333	0.146667	2	20.8889	1.01461	0.0011627	0.147565	11.1529	11.4194
WT_NT E4 WT NTx40-9 (35)	2.68332	6.19516	6.18124	6.19516	3.26826	3.32955	0.16178	0.16178	0.971607	4.1223	0.804775	0.00791111	0.168333	3.5	24.7138	1.09938	0.00122581	0.353553	1.4829	1.70157
WT_NT E4 WT NTx40-9 (36)	2.81716	7.22725	20.4958	7.22725	10.1602	2.04611	0.0487904	0.0487904	0.902415	2.22689	0.690104	0.00853333	0.396667	9.5	26.7189	1.09096	0.00125578	0.581843	5.44825	7.54577
WT_NT E4 WT NTx40-9 (37)	2.62841	5.81569	23.4012	5.81569	3.92817	2.2351	0.0427328	0.0427328	0.761712	5.38095	0.843284	0.0119111	0.62	2.75	37.0454	1.1657	0.00197129	0.386334	1.55392	25.768
WT_NT E4 WT NTx40-9 (38)	2.78311	6.94946	17.001	6.94946	5.71955	2.47315	0.0588199	0.0588199	0.851101	4.52469	0.818994	0.00994444	0.566667	2.28571	51.3452	1.11062	0.00153831	0.170441	2.70362	8.26232
WT_NT E4 WT NTx40-9 (39)	2.59963	5.62614	1.9401	5.62614	2.8209	3.33163	0.515437	0.515437	0.99458	1.52235	0.603545	0.0119111	0.06	3.33333	17.6955	1.15315	0.0022005	0.244339	1.42262	1.4253
WT_NT E4 WT NTx40-9 (4)	2.45634	4.7705	12.0287	4.7705	3.93282	2.3253	0.0831344	0.0831344	0.966647	2.91729	0.744722	0.00578889	0.186667	4	6.4433	1.02114	0.000932718	0.837004	2.77608	6.85453
WT_NT E4 WT NTx40-9 (40)	2.39412	4.44071	1.75971	4.44071	2.72978	2.85405	0.568276	0.568276	1.06187	1.17181	0.539556	0.0125	0.108333	4.5	14.2488	1.13124	0.00254088	0.0298142	2.69083	2.84211
WT_NT E4 WT NTx40-9 (41)	2.48181	4.9125	16.654	4.9125	4.41129	2.39899	0.0600455	0.0600455	1.02567	4.90476	0.830645	0.00826667	0.508333	2.66667	19.9369	1.06642	0.00133756	0.559618	15.4279	16.7758
WT_NT E4 WT NTx40-9 (42)	2.42457	4.59918	25.8173	4.59918	4.43813	1.76585	0.0387337	0.0387337	0.808863	3.32456	0.768763	0.00547778	0.58	0	20.4327	0.99862	0.000785174	1.20849	18.3072	32.8683
WT_NT E4 WT NTx40-9 (43)	2.62494	5.79251	5.85692	5.79251	3.49342	3	0.170738	0.170738	0.96801	2.87415	0.741879	0.0126556	0.156667	2.14286	42.2734	1.15373	0.00218359	0.0838075	4.4009	4.44128
WT_NT E4 WT NTx40-9 (44)	2.77587	6.89174	14.3449	6.89174	4.7082	2.83142	0.0697112	0.0697112	0.891461	4.6135	0.821858	0.0101667	0.408333	2.25	37.0864	1.11142	0.00163784	0.033059	1.78648	7.34204
WT_NT E4 WT NTx40-9 (45)	2.64369	5.91885	14.6828	5.91885	4.07279	2.4466	0.068107	0.068107	0.834203	2.95205	0.746967	0.00641111	0.195	5	29.6265	1.03855	0.000958231	0.224187	9.04984	11.5389
WT_NT E4 WT NTx40-9 (46)	2.71088	6.39493	14.3652	6.39493	6.61765	2.46032	0.0696126	0.0696126	0.989708	3.50602	0.778075	0.00831111	0.443333	10	26.4192	1.06096	0.00126964	0.589571	1.70725	3.1601
WT_NT E4 WT NTx40-9 (47)	2.95022	8.42373	21.7039	8.42373	8.48813	2.87537	0.0460747	0.0460747	0.994478	4.31818	0.811966	0.0117	1.09167	4.66667	69.6327	1.12854	0.00164089	0.650079	1.19509	1.91369
WT_NT E4 WT NTx40-9 (48)	2.79725	7.06352	4.01754	7.06352	6.03817	2.65909	0.248908	0.248908	0.925049	2.2887	0.695929	0.00873333	0.201667	2.75	41.6837	1.07579	0.0013656	0.178344	1.07035	1.17149
WT_NT E4 WT NTx40-9 (49)	2.77016	6.84664	22.7199	6.84664	5.93197	2.41912	0.0440142	0.0440142	0.860556	4.36496	0.813605	0.00816667	0.398333	8	35.1589	1.08608	0.00117534	0.304166	6.31528	6.31534
WT_NT E4 WT NTx40-9 (5)	2.41002	4.52278	17.6509	4.52278	3.61493	1.87783	0.0566544	0.0566544	0.789405	3.85507	0.79403	0.00744444	0.331667	2.75	12.0301	1.06649	0.00120149	0.553146	1.24212	15.1289
WT_NT E4 WT NTx40-9 (50)	2.87084	7.68799	15.3038	7.68799	6.83636	2.76176	0.0653434	0.0653434	0.939258	3.86047	0.794258	0.0116111	0.511667	6	35.2301	1.12242	0.00178017	0.309344	1.47635	3.14999
WT_NT E4 WT NTx40-9 (51)	2.62729	5.80818	6.93053	5.80818	4.56193	2.66667	0.144289	0.144289	0.980624	2.20588	0.688073	0.00968889	0.346667	3.33333	25.215	1.08352	0.00166027	0.273022	4.22842	4.28759
WT_NT E4 WT NTx40-9 (52)	2.58537	5.53453	4.44547	5.53453	3.79504	2.87302	0.224948	0.224948	1.01127	2.23207	0.690601	0.00851111	0.163333	2	20.8412	1.07365	0.0014534	0.36847	1.96693	2.0095
WT_NT E4 WT NTx40-9 (53)	2.77269	6.86657	8.39696	6.86657	5.59848	2.95149	0.119091	0.119091	1.01704	3.63158	0.784091	0.0117333	0.61	3.25	40.4457	1.14049	0.00177442	0.591928	1.01974	1.2834
WT_NT E4 WT NTx40-9 (54)	2.45828	4.78121	2.98035	4.78121	2.46462	3.17273	0.335531	0.335531	1.04177	2.33858	0.700472	0.00471111	0.00833333	2	13.7912	0.956743	0.000763965	0.153574	1.36995	2.8418
WT_NT E4 WT NTx40-9 (55)	2.63088	5.83221	7.69692	5.83221	5.43286	2.52074	0.129922	0.129922	1.00741	2.7037	0.73	0.00777778	0.291667	5	26.3327	1.03996	0.00122196	0.473588	2.3624	2.43365
WT_NT E4 WT NTx40-9 (56)	2.32554	4.10358	12.4862	4.10358	3.50116	1.72571	0.0800884	0.0800884	0.786885	2.10072	0.677494	0.00478889	0.0866667	0	15.3733	1.00094	0.000724767	0.474403	1.0713	16.9549
WT_NT E4 WT NTx40-9 (57)	2.78676	6.97874	23.4694	6.97874	6.73485	2.47368	0.0426087	0.0426087	0.91988	4.25	0.809524	0.0102667	0.566667	8.5	32.5348	1.11092	0.00155109	0.478996	8.00614	8.5481
WT_NT E4 WT NTx40-9 (58)	2.74689	6.66564	16.5382	6.66564	5.20522	2.54753	0.0604661	0.0604661	0.871961	4.12102	0.804726	0.00893333	0.465	4	28.1685	1.09584	0.00139251	0.141069	6.97654	9.86778
WT_NT E4 WT NTx40-9 (59)	2.47195	4.85702	7.7411	4.85702	3.81873	2.59064	0.129181	0.129181	1.04231	2.7191	0.731118	0.00735556	0.338333	3.5	33.8512	1.05154	0.00115113	0.69959	1.25107	6.05851
WT_NT E4 WT NTx40-9 (6)	2.60849	5.68384	7.07972	5.68384	2.50571	3.52332	0.141249	0.141249	0.981239	5.86145	0.854258	0.0126556	0.361667	1.625	19.8571	1.14768	0.00237189	0.682144	1.12858	3.01876
WT_NT E4 WT NTx40-9 (60)	2.70089	6.32179	4.07246	6.32179	3.56435	3.33333	0.245552	0.245552	0.995471	3.4717	0.776371	0.0105333	0.258333	1.5	46	1.12606	0.00175417	0.117103	1.38375	1.53166
WT_NT E4 WT NTx40-9 (61)	2.37577	4.34792	1.62237	4.34792	2.23239	2.72772	0.616381	0.616381	0.937356	1.25397	0.556338	0.0142	0.0333333	2	15.2124	1.16056	0.00296438	0.118678	2.45464	2.45563
WT_NT E4 WT NTx40-9 (62)	2.86207	7.61076	4.98038	7.61076	4.45741	3.35484	0.200788	0.200788	0.930647	3.17105	0.760252	0.0105667	0.37	2.8	41.3956	1.12523	0.00167606	0.412731	1.15183	1.19444
WT_NT E4 WT NTx40-9 (63)	2.95862	8.50565	12.8637	8.50565	4.02076	4.14921	0.077738	0.077738	0.978164	6.42688	0.865354	0.0208778	0.535	1.91667	48.5615	1.2329	0.00357588	0.48665	1.3199	3.01313
WT_NT E4 WT NTx40-9 (64)	2.4139	4.54303	13.4105	4.54303	3.22222	2.10156	0.0745683	0.0745683	0.830376	3.05818	0.753584	0.0124	0.591667	1.33333	22.3175	1.1151	0.0022771	0.939477	19.1847	29.6024
WT_NT E4 WT NTx40-9 (65)	2.89839	7.93579	10.4294	7.93579	6.15202	2.93808	0.0958826	0.0958826	0.918295	3.78151	0.790861	0.0126444	0.488333	4	25.6711	1.14501	0.00198571	0.31927	2.07277	2.49317
WT_NT E4 WT NTx40-9 (66)	2.9062	8.00751	10.0637	8.00751	6.82929	3.19932	0.0993667	0.0993667	1.04412	4.59296	0.821204	0.0123667	0.38	2.375	49.1729	1.13077	0.0019001	0.379151	1.13959	1.47209
WT_NT E4 WT NTx40-9 (67)	2.49515	4.9885	13.2839	4.9885	2.87411	2.51131	0.0752794	0.0752794	0.853459	4.32432	0.812183	0.0109444	0.226667	1.5	26.2812	1.12291	0.00194357	0.414214	12.3796	18.3047
WT_NT E4 WT NTx40-9 (68)	2.46322	4.80845	9.83182	4.80845	5.21937	2.07054	0.101711	0.101711	0.983756	2.79204	0.736289	0.00952222	0.28	0	23.9762	1.09139	0.00155524	0.649926	2.37772	6.13471
WT_NT E4 WT NTx40-9 (69)	2.44128	4.68849	3.13196	4.68849	3.30769	2.42949	0.319289	0.319289	0.94242	2.11377	0.678846	0.00577778	0.0533333	8	10.5411	1.02947	0.000918521	0.333974	1.34295	1.44169
WT_NT E4 WT NTx40-9 (7)	2.57368	5.46055	3.49307	5.46055	3.75255	2.80829	0.286281	0.286281	0.996251	1.2924	0.563776	0.00871111	0.19	3.5	20.4186	1.09162	0.00155901	0.208248	4.35793	4.455
WT_NT E4 WT NTx40-9 (70)	2.49832	5.00674	3.06872	5.00674	2.49117	3.21014	0.325868	0.325868	1.01198	2.22798	0.690209	0.00692222	0.156667	2	18.4209	1.03309	0.00116232	0.611553	2.18012	2.18019
WT_NT E4 WT NTx40-9 (71)	2.75566	6.73328	19.9044	6.73328	6.25283	2.49259	0.0502401	0.0502401	0.925685	2.69767	0.72956	0.00883333	0.948333	3.75	29.5879	1.07774	0.00138054	1.25793	9.36389	9.96429
WT_NT E4 WT NTx40-9 (72)	2.71978	6.46079	6.10952	6.46079	3.00261	3.38865	0.163679	0.163679	0.908846	1.63303	0.620209	0.0127556	0.476667	1.3	42.0351	1.14692	0.00216376	0.805577	2.24498	12.2535
WT_NT E4 WT NTx40-9 (73)	2.42023	4.57627	3.27221	4.57627	2.95805	2.49153	0.305603	0.305603	0.93639	2.21304	0.688769	0.00821111	0.01	3	10.4695	1.06358	0.00144001	0.0822551	2.26187	2.69315
WT_NT E4 WT NTx40-9 (74)	2.65435	5.992	5.19751	5.992	6.83315	2.48638	0.1924	0.1924	1.08469	3.43627	0.774586	0.0100556	0.195	4.5	19.8631	1.11319	0.00170383	0.41117	1.0568	1.13974
WT_NT E4 WT NTx40-9 (75)	2.72722	6.51639	12.1308	6.51639	5.03333	2.73913	0.0824349	0.0824349	0.943047	2.58566	0.721111	0.01	0.51	4.5	21.8197	1.10294	0.0015834	0.551765	7.21673	8.10558
WT_NT E4 WT NTx40-9 (76)	2.25411	3.77964	1.43462	3.77964	2.38382	2.64968	0.697051	0.697051	1.08238	0.991736	0.497925	0.0107111	0.0716667	5	11.7188	1.11128	0.00217293	0.2037	1.75522	2.74331
WT_NT E4 WT NTx40-9 (77)	2.32625	4.10696	3.14024	4.10696	3.42879	2.18605	0.318447	0.318447	0.98562	2.19139	0.686657	0.00741111	0.0766667	0	4.22707	1.04152	0.00134294	0.478942	1.06654	1.12545
WT_NT E4 WT NTx40-9 (78)	2.82367	7.28163	8.43041	7.28163	5.31548	2.92754	0.118618	0.118618	0.926925	3.4121	0.773351	0.0170111	1.10667	4.25	51.5279	1.2209	0.00289095	0.171443	1.82243	2.66183
WT_NT E4 WT NTx40-9 (79)	2.15905	3.38783	3.51531	3.38783	4.11584	1.55346	0.28447	0.28447	0.930266	1.0534	0.513002	0.0047	0.0233333	0	3.87558	1.00577	0.000804572	0.243108	2.22666	3.40287
WT_NT E4 WT NTx40-9 (8)	2.63839	5.88287	9.44474	5.88287	5.57765	2.29434	0.105879	0.105879	0.921073	2.86364	0.741176	0.00944444	0.355	7.5	28.0778	1.08068	0.001514	0.145521	1.19233	5.45821
WT_NT E4 WT NTx40-9 (80)	2.58497	5.53196	10.6084	5.53196	5.26116	2.26641	0.0942654	0.0942654	0.939723	3.16744	0.760045	0.00995556	0.531667	10	18.0925	1.11569	0.00170742	0.493258	1.99577	2.5608
WT_NT E4 WT NTx40-9 (81)	2.47207	4.85768	9.15035	4.85768	3.22449	2.24887	0.109285	0.109285	0.831315	2.89252	0.743097	0.00925556	0.118333	6	17.4733	1.06388	0.00156866	0.142857	7.708	11.189
WT_NT E4 WT NTx40-9 (82)	1.95661	2.6835	1.32134	2.6835	1.25283	2.25773	0.756808	0.756808	0.94171	0.749175	0.428302	0.00588889	0.00666667	0	0.15859	1.05496	0.00116496	0.221487	1.38406	6.41909
WT_NT E4 WT NTx40-9 (83)	2.68233	6.18813	6.11847	6.18813	3.2609	3.30579	0.16344	0.16344	0.964682	4.54167	0.819549	0.0147778	0.423333	2.25	27.7761	1.17277	0.00271817	0.275572	1.04862	1.6492
WT_NT E4 WT NTx40-9 (84)	2.37532	4.34564	3.90946	4.34564	2.55386	2.73099	0.25579	0.25579	1.0043	2.11525	0.678999	0.0102111	0.223333	1.5	13.5641	1.10192	0.00193132	0.376109	4.02735	4.14455
WT_NT E4 WT NTx40-9 (85)	2.49884	5.00973	8.23846	5.00973	2.86587	2.58084	0.121382	0.121382	0.872117	2.54819	0.718166	0.00654444	0.0783333	2	26.5626	1.0615	0.00105888	0.619436	1.75984	13.1464
WT_NT E4 WT NTx40-9 (9)	1.94207	2.63893	1.05523	2.63893	1.35673	2.27632	0.947659	0.947659	1.00473	0.628571	0.385965	0.0038	0.01	0	4.73485	0.962537	0.000690184	0.162221	1.48347	4.79809
WT_NT WT 2 non traité x40_DSP (1)	2.15615	3.37652	2.38771	3.37652	1.83721	2.49438	0.418812	0.418812	1.00132	0.869565	0.465116	0.00382222	0.08	0	5.625	0.927763	0.000643793	0.304997	6.80962	7.60257
WT_NT WT 2 non traité x40_DSP (10)	1.93358	2.61327	1.33093	2.61327	1.5208	2.0885	0.751354	0.751354	0.985565	0.828169	0.453005	0.00721111	0.0816667	2	4.40816	1.04369	0.00145643	0.277564	1.53162	4.33034
WT_NT WT 2 non traité x40_DSP (11)	2.43896	4.67603	16.1117	4.67603	3.73209	2.24599	0.0620667	0.0620667	0.927912	6.37931	0.864486	0.00713333	0.503333	2.66667	13.6378	1.06142	0.0011967	1.02386	5.43712	5.72255
WT_NT WT 2 non traité x40_DSP (12)	2.38149	4.37665	4.26341	4.37665	2.63391	2.54472	0.234554	0.234554	0.94362	2.53913	0.717445	0.00452222	0.106667	3.33333	9.9863	1.02797	0.000734104	0.470245	3.4333	3.69596
WT_NT WT 2 non traité x40_DSP (2)	2.07314	3.06879	1.09915	3.06879	1.86095	2.24719	0.909794	0.909794	0.998942	0.769634	0.434911	0.00375556	0.04	0	4.2517	0.981897	0.000668278	0.163178	1.76793	2.39729
WT_NT WT 2 non traité x40_DSP (3)	2.33369	4.1423	3.09788	4.1423	2.60584	2.6478	0.322801	0.322801	1.03185	1.67752	0.626521	0.00913333	0.243333	4.5	14.0291	1.08147	0.00165489	0.48955	1.76055	2.71911
WT_NT WT 2 non traité x40_DSP (4)	2.40075	4.47479	10.9668	4.47479	4.39013	1.92529	0.0911842	0.0911842	0.901492	2.77966	0.735426	0.00495556	0.18	3.5	14.939	1.00044	0.000760258	0.724337	5.36977	12.2373
WT_NT WT 2 non traité x40_DSP (5)	2.28317	3.90823	4.77634	3.90823	2.17766	2.52294	0.209365	0.209365	0.952625	4.25333	0.809645	0.00437778	0.085	1.5	7.22257	0.963721	0.000743353	0.225303	1.45535	2.62414
WT_NT WT 2 non traité x40_DSP (6)	1.9571	2.68499	2.65863	2.68499	1.99482	1.55833	0.376134	0.376134	0.819727	0.829384	0.453368	0.00428889	0.0516667	3.5	10.08	0.958495	0.00073477	0.227626	9.62447	11.0894
WT_NT WT 2 non traité x40_DSP (7)	1.93507	2.61775	1.96994	2.61775	1.3875	2.18421	0.50763	0.50763	0.98284	1.16216	0.5375	0.00355556	0	0	1.68023	0.96214	0.000628385	0.30104	7.89235	8.78269
WT_NT WT 2 non traité x40_DSP (8)	2.10038	3.16655	1.38007	3.16655	1.77597	2.49367	0.724602	0.724602	1.04947	1.54545	0.607143	0.00342222	0.03	2	6.5508	0.965133	0.000583164	0.0805823	1.57262	1.92888
WT_NT WT 2 non traité x40_DSP (9)	1.86096	2.40368	0.476814	2.40368	1.21103	2.32	2.09725	2.09725	1.06216	0.376238	0.273381	0.00463333	0	0	0.710526	1.00406	0.000926557	0	1.57823	1.62073
WT_NT WT 3 non traité x40_DSP (1)	2.87358	7.71228	2.67297	7.71228	2.64805	4.71486	0.374115	0.374115	0.99483	2.11486	0.678959	0.0204889	0.425	2.28571	47.5527	1.24494	0.00400839	0.118743	2.82009	3.14278
WT_NT WT 3 non traité x40_DSP (10)	2.46843	4.8374	6.35396	4.8374	2.40192	3.04605	0.157382	0.157382	0.975898	2.06303	0.673525	0.0081	0.201667	1.2	22.4542	1.03828	0.00136385	0.318605	17.6837	18.2244
WT_NT WT 3 non traité x40_DSP (11)	2.52638	5.17114	1.84641	5.17114	2.97436	2.86782	0.541591	0.541591	0.956448	1.30841	0.566802	0.00823333	0.201667	12	16.8	1.0922	0.00149537	0.348508	1.02832	1.8407
WT_NT WT 3 non traité x40_DSP (12)	2.83787	7.40166	15.8523	7.40166	5.43228	2.89259	0.0630822	0.0630822	0.910855	4.40244	0.814898	0.00984444	0.545	4.75	32.8476	1.11573	0.00147504	0.300489	3.07546	6.44973
WT_NT WT 3 non traité x40_DSP (13)	2.48193	4.91317	4.6779	4.91317	3.13169	2.68812	0.213771	0.213771	0.968224	3.37838	0.771605	0.0108	0.331667	1.25	17.328	1.11146	0.00195084	0.514202	1.3637	1.59983
WT_NT WT 3 non traité x40_DSP (14)	2.54424	5.27857	2.62617	5.27857	2.61345	3.44828	0.380783	0.380783	1.05607	2.4	0.705882	0.00793333	0.161667	4.5	17.1607	1.06035	0.00139664	0.261968	1.60053	1.65736
WT_NT WT 3 non traité x40_DSP (15)	2.30967	4.02932	0.705642	4.02932	1.45329	3.31818	1.41715	1.41715	0.992762	0.984802	0.496172	0.00725556	0.01	1.33333	11.4846	1.10536	0.00145802	0.078266	1.31977	1.32103
WT_NT WT 3 non traité x40_DSP (16)	2.42049	4.57763	1.77301	4.57763	2.55992	2.70455	0.564012	0.564012	0.945293	1.40796	0.584711	0.00537778	0.005	6	12.7208	1.06241	0.000907108	0.14374	1.65367	1.94614
WT_NT WT 3 non traité x40_DSP (17)	2.53803	5.24098	8.95333	5.24098	6.35644	2	0.11169	0.11169	0.96211	2.68229	0.72843	0.00785556	0.51	14	18.6485	1.08747	0.00121995	0.49036	1.5297	2.0909
WT_NT WT 3 non traité x40_DSP (18)	2.8727	7.70455	6.96448	7.70455	5.17718	3.05058	0.143586	0.143586	0.900912	0.615686	0.381068	0.00915556	0.305	11	13.4554	1.0914	0.0013391	0.694115	8.79316	12.2271
WT_NT WT 3 non traité x40_DSP (19)	2.57423	5.464	4.22329	5.464	3.93303	2.71429	0.236782	0.236782	0.985163	1.32796	0.570439	0.00962222	0.303333	4.33333	26.3077	1.10255	0.00172522	0.307715	1.67477	6.29259
WT_NT WT 3 non traité x40_DSP (2)	3.05244	9.47578	7.6709	9.47578	5.8213	4.3042	0.130363	0.130363	1.09594	3.30449	0.767684	0.0149222	0.576667	7.25	49.9796	1.19287	0.00236296	0.295158	2.05433	2.86261
WT_NT WT 3 non traité x40_DSP (3)	2.77912	6.91757	3.64256	6.91757	3.73125	3.64372	0.274532	0.274532	1.01746	2.98521	0.749072	0.0149667	0.116667	3	34.2874	1.1814	0.00269439	0.0272468	1.88524	2.13245
WT_NT WT 3 non traité x40_DSP (4)	2.71276	6.40876	5.00877	6.40876	3.24304	3.39352	0.19965	0.19965	0.95357	3.08235	0.755043	0.0115667	0.34	4	23.5318	1.13816	0.00194837	0.198457	2.13737	2.86192
WT_NT WT 3 non traité x40_DSP (5)	2.55235	5.32805	7.98916	5.32805	3.94413	2.38756	0.12517	0.12517	0.889942	2.37198	0.703438	0.00775556	0.181667	5.5	13.3625	1.08061	0.00123954	0.455781	1.28148	4.44583
WT_NT WT 3 non traité x40_DSP (6)	2.56551	5.40941	12.9468	5.40941	3.07425	2.42672	0.0772393	0.0772393	0.786575	3.65946	0.785383	0.00957778	0.256667	2.75	13.0517	1.11759	0.00168046	0.304643	9.32433	23.0077
WT_NT WT 3 non traité x40_DSP (7)	2.66603	6.0731	12.8392	6.0731	3.47705	2.82833	0.0778864	0.0778864	0.868409	3.39906	0.772679	0.0104111	0.448333	4	27.4599	1.12303	0.00172041	0.134696	8.19351	19.0621
WT_NT WT 3 non traité x40_DSP (8)	2.90693	8.01417	11.1761	8.01417	5.8749	3.43902	0.089477	0.089477	1.0401	5.22165	0.839271	0.0134111	0.935	6.4	46.9141	1.15592	0.00201643	0.57926	1.60845	1.68612
WT_NT WT 3 non traité x40_DSP (9)	2.61093	5.69984	4.25015	5.69984	5.21174	2.66111	0.235286	0.235286	1.06584	1.89691	0.654804	0.00624444	0.13	0	13.6984	1.02705	0.000997516	0.295277	1.05469	1.96624
