# Supplementary material for: MorphoCellSorter is an Andrews plot-based sorting approach to rank microglia according to their morphological features
Source: eLife. 2025 May 19;13:RP101630. doi: 10.7554/eLife.101630 (PMC12088675; doi:10.7554/eLife.101630)
Supplement: Figure 5—source data 1. [file elife-101630-fig5-data1.xlsx]

## Sheet: Parameters
microglia	PerimeterAreaRatio	ModifiedCircularity	RoundnessFactor	RamificationIndex	Solidity	Convexity	ConvexHullRadiiRatio	SpanRatio	ConvexHullCircularity	ProcessesSomaAreasRatio	ProcessesCellAreasRatio	Density	BranchingIndex	EndpointsBranchpointsRatio	SkeletonProcessesRatio	FractalDimension	LacunaritySlope	PolarizationIndex	Linearity	Inertia
MAX_AZ_Acq43-Sc1D_crop01-2	3.39814	0.0708815	0.0432392	14.1081	0.213967	5.86553	2.47204	2.03773	0.898807	9.00435	0.900043	0.0255667	1.93667	1.57143	243.409	1.29751	0.00359225	0.121557	2.52808	5.35478
MAX_AZ_Acq43-Sc1D_crop02-1	3.29358	0.0799497	0.0337495	12.5079	0.291046	7.10922	1.95036	1.66335	1.05356	17.7034	0.946534	0.0245222	2.56167	0.734375	202.873	1.28777	0.00371278	1.06623	3.81375	3.89225
MAX_AZ_Acq43-Sc1D_crop06-1	2.74963	0.149551	0.509637	6.6867	0.486512	5	1.75	1.45665	1.07204	2.46128	0.711089	0.0114222	0.04	0.6875	54.7196	1.13689	0.00211971	0.0441081	1.98556	1.98981
MAX_AZ_Acq43-Sc1D_crop07-1	2.83982	0.134801	0.410723	7.41833	0.388	4.85311	1.97329	1.59837	1.05026	2.47557	0.712277	0.0118556	0.0516667	0.483871	82.2368	1.1397	0.0021555	0.0432945	1.33369	2.23929
MAX_AZ_Acq43-Sc1D_crop08-2	3.1768	0.091455	0.0955363	10.9343	0.331298	6.64609	1.66804	1.273	1.056	12.3538	0.925115	0.0192889	0.958333	0.607143	153.186	1.23654	0.0031472	0.532904	1.31509	1.37681
MAX_AZ_Acq43-Sc1D_crop14-1	3.15635	0.0936336	0.133898	10.6799	0.282689	6.17992	1.37859	1.15074	1.08833	8.75641	0.897503	0.0169111	0.455	1.12821	135.989	1.22877	0.0026331	0.298925	1.15771	1.31682
MAX_AZ_Acq43-Sc1D_crop15-2	3.1588	0.093369	0.135799	10.7102	0.292132	6.36842	1.3598	1.10725	1.10013	8.03676	0.889341	0.0136556	0.321667	1.09677	124.575	1.17221	0.00210215	0.0902036	1.42149	1.4222
MAX_AZ_Acq43-Sc1D_crop17-1	2.87131	0.130003	0.182222	7.69215	0.352985	4.61712	2.21624	1.85212	1.01029	3.78983	0.791224	0.0157	0.398333	0.666667	95.6431	1.19053	0.0027683	0.170342	4.36022	4.3804
MAX_AZ_Acq43-Sc1D_crop20-1	3.18895	0.090184	0.112088	11.0884	0.320772	6.19623	2.28251	1.69352	0.98664	6.72124	0.870487	0.0193889	1.16667	0.481481	142.96	1.24171	0.0032036	0.258938	3.03455	3.3586
MAX_AZ_Acq43-Sc1D_crop21-1	2.5603	0.185975	0.608782	5.37708	0.336596	3.00746	1.59652	1.21065	0.964049	1.44262	0.590604	0.00496667	0.0716667	0.6	26.0947	1.0141	0.000766933	0.369412	1.16241	1.17016
MAX_AZ_Acq43-Sc1D_crop24-1	1.91683	0.390113	1.30411	2.56336	0.783217	2.51852	2.07179	1.67486	1.11018	0.611511	0.379464	0.00248889	0	1	3.4	0.840057	0.000430221	0.149404	1.78428	2.80542
MAX_AZ_Acq43-Sc1D_crop24-2	2.21551	0.2766	0.523481	3.61533	0.557252	2.84416	2.25156	1.6851	1.05385	1.7037	0.630137	0.00324444	0	0	3.67391	0.902543	0.000533582	0.117041	1.78437	3.20723
MAX_AZ_Acq43-Sc1D_crop25-3	2.99079	0.113295	0.0742374	8.82653	0.359563	4.84236	2.35632	2.04701	0.914914	9.07143	0.900709	0.0109667	0.538333	0.857143	83.8346	1.20525	0.00170466	0.271959	1.0157	4.89816
MAX_AZ_Acq43-Sc1D_crop26-2	2.68377	0.161332	0.230663	6.1984	0.398123	4.1844	1.77179	1.43166	1.0699	4.86179	0.829404	0.00801111	0.0816667	0.909091	44.9766	1.07238	0.00134057	0.166551	1.58992	2.02062
MAX_AZ_Acq43-Sc1D_crop27-1	2.77563	0.145141	0.341381	6.88986	0.4971	4.96528	2.21256	1.87703	1.02214	2.63136	0.724621	0.00952222	0.198333	0.695652	72.3736	1.13236	0.00171947	0.241543	4.1752	4.47881
MAX_AZ_Acq43-Sc1D_crop28-2	2.81519	0.138678	0.234904	7.21093	0.315282	3.9881	1.7254	1.27615	0.984973	3.54967	0.780204	0.00763333	0.158333	1.25	63.1642	1.07311	0.00118965	0.170623	1.13546	2.41936
MAX_AZ_Acq43-Sc1D_crop40-2	3.24418	0.0846281	0.153336	11.8164	0.302612	6.893	1.83606	1.32927	1.06043	5.74684	0.851782	0.0177667	0.586667	0.916667	157.393	1.2261	0.00286383	0.127515	2.2518	2.27276
MAX_AZ_Acq43-Sc1D_crop45-2	2.65684	0.166411	0.342288	6.0092	0.452613	4.10241	1.8992	1.49939	1.01475	2.88593	0.742661	0.0113556	0.0583333	0.684211	58.6574	1.13081	0.00211959	0.0442374	1.05442	3.01242
MAX_AZ_Acq43-Sc1D_crop47-2	2.75736	0.148226	0.206855	6.74643	0.344238	3.64943	2.33783	1.76589	0.921978	3.40625	0.77305	0.00783333	0.121667	0.545455	44.6532	1.06707	0.00124463	0.219606	2.96038	2.9695
MAX_AZ_Acq43-Sc1D_crop49-1	3.13267	0.0962205	0.0591164	10.3928	0.243701	5.18298	2.40051	1.86397	1.01023	6.28667	0.862763	0.0121444	0.81	3.33333	72.7932	1.1663	0.00168219	0.570709	4.26789	5.98998
MAX_AZ_Acq43-Sc1D_crop54-2	3.08784	0.101318	0.13044	9.86995	0.251525	4.70817	2.09461	1.48988	0.951146	5.83429	0.853679	0.0132889	0.415	1.2	95.3418	1.18206	0.00200908	0.155716	1.85314	2.33902
MAX_AZ_Acq43-Sc1G_crop02-1	3.35033	0.0748927	0.0803646	13.3524	0.280757	7.7033	1.55721	1.16086	1.08881	12.0728	0.923506	0.0219333	0.676667	1.64865	168.966	1.27204	0.00322665	0.0711748	1.39884	1.5334
MAX_AZ_Acq43-Sc1G_crop07-1	3.28954	0.0803223	0.0764706	12.4498	0.274514	6.43188	2.24128	1.77233	0.986034	7.56949	0.883307	0.0280889	1.235	0.627451	198.041	1.32652	0.00463491	0.127351	1.42874	4.31852
MAX_AZ_Acq43-Sc1G_crop12-1	3.49347	0.063514	0.0529365	15.7445	0.24982	7.50136	2.30296	1.71639	0.953226	11.0446	0.916975	0.0270333	1.43167	1.07407	245.45	1.30608	0.00394676	0.0286711	3.43881	3.71187
MAX_AZ_Acq43-Sc1G_crop13-1	3.18351	0.0907511	0.104122	11.0191	0.227193	5.35636	1.5249	1.13897	1.01982	7.46429	0.881857	0.0158	0.446667	1.41667	113.341	1.2277	0.00228391	0.0265186	1.6022	1.73071
MAX_AZ_Acq43-Sc1G_crop14-2	3.08705	0.101409	0.10018	9.86101	0.231611	4.83077	1.99647	1.65023	1.01792	5.29756	0.841208	0.0143444	0.698333	1.45455	93.116	1.19302	0.00213335	0.111326	3.72691	4.11574
MAX_AZ_Acq43-Sc1G_crop16-2	3.24482	0.0845663	0.304128	11.825	0.332855	7.04044	1.60357	1.17446	1.03198	4.24372	0.809296	0.0231889	0.49	0.490196	193.038	1.27	0.00389705	0.0218896	1.07022	1.07343
MAX_AZ_Acq43-Sc1G_crop17-2	3.39347	0.0712636	0.0620492	14.0324	0.246806	7.31818	1.87311	1.53591	1.04977	9.07265	0.900721	0.0261889	1.33333	1.39535	179.898	1.29832	0.00392592	0.125291	2.80303	3.41653
MAX_AZ_Acq43-Sc1G_crop18-1	2.62118	0.173386	0.152005	5.76748	0.33218	3.13609	3.11145	1.93886	0.943444	2.12558	0.68006	0.00746667	0.433333	0.857143	38.1269	1.08833	0.00120743	0.588835	8.00444	8.53471
MAX_AZ_Acq43-Sc1G_crop20-3	3.37112	0.0731218	0.0916478	13.6758	0.246457	6.67135	1.64542	1.33393	0.98263	8.33852	0.892917	0.0266667	1.26667	1.33333	172.498	1.2983	0.00405097	0.303452	1.35124	1.95592
MAX_AZ_Acq62-Sc1D_crop01-1	3.2257	0.0864479	0.0887472	11.5677	0.263058	5.98675	2.38329	1.99717	1.00907	6.04348	0.858025	0.0216	1.05167	0.591837	170.317	1.25253	0.00351208	0.315087	3.61587	5.11308
MAX_AZ_Acq62-Sc1D_crop03-5	3.11619	0.0980641	0.142447	10.1974	0.276008	5.44403	1.7589	1.37035	1.01618	5.46429	0.845304	0.0181	0.553333	1.27586	112.163	1.23993	0.00292506	0.0783501	1.98992	2.10085
MAX_AZ_Acq62-Sc1D_crop06-2	3.2426	0.084782	0.0790771	11.795	0.230368	5.58788	2.32951	1.60289	0.987051	8.39614	0.893573	0.0216111	1.11167	0.57377	202.33	1.25229	0.00333245	0.0641335	1.05558	1.93806
MAX_AZ_Acq62-Sc1D_crop07-1	3.24211	0.0848302	0.084087	11.7883	0.258816	6.2406	1.6911	1.25713	1.04059	9.66216	0.90621	0.0175333	0.611667	1.8	141.608	1.23127	0.00256459	0.207587	1.66623	1.81291
MAX_AZ_Acq62-Sc1D_crop08-2	3.06236	0.104334	0.29599	9.58459	0.378151	6.30045	1.8689	1.57618	1.06897	3.4186	0.773684	0.019	0.231667	1.09091	125.207	1.22608	0.00339432	0.0241825	2.24862	2.29973
MAX_AZ_Acq62-Sc1D_crop09-3	3.30141	0.0792318	0.0825446	12.6212	0.274131	6.74627	1.87362	1.51057	1.0209	9.08025	0.900796	0.0181444	0.466667	1.21212	138.888	1.2246	0.0027182	0.139985	2.21644	2.32725
MAX_AZ_Acq62-Sc1D_crop10-1	2.74301	0.150695	0.412366	6.63593	0.376171	4.46405	1.69862	1.28074	1.09682	2.3189	0.698695	0.00936667	0.126667	1.14286	44.5569	1.12467	0.00157291	0.351239	1.66461	1.92974
MAX_AZ_Acq62-Sc1D_crop14-3	2.8514	0.133017	0.211645	7.51785	0.314036	3.94737	1.96003	1.28989	0.936966	3.55172	0.780303	0.0088	0.305	0.761905	58.4142	1.11591	0.00139756	0.433741	1.19554	2.13277
MAX_AZ_Acq62-Sc1D_crop15-2	2.92482	0.122234	0.0855669	8.181	0.317485	4.64179	1.78831	1.37483	1.00697	11.7778	0.921739	0.0115	0.571667	1.27273	81.0105	1.15265	0.0018788	0.422781	1.66402	1.72637
MAX_AZ_Acq62-Sc1D_crop16-4	3.38576	0.0718997	0.0862756	13.9083	0.257332	7.52866	1.43417	1.19138	1.06708	9.79343	0.907351	0.0255444	1.53	0.868852	212.635	1.28638	0.00387397	0.356997	1.37439	1.49478
MAX_AZ_Acq62-Sc1D_crop17-2	3.18329	0.0907737	0.0825849	11.0164	0.34005	6.9322	1.83704	1.59155	1.0791	11.1034	0.917379	0.0195	0.816667	0.906977	144.9	1.23648	0.00313769	0.430331	2.23015	2.62985
MAX_AZ_Acq62-Sc1D_crop19-1	2.94527	0.119391	0.250938	8.37584	0.311858	4.87745	1.76669	1.38729	1.04276	4.2723	0.810329	0.0124778	0.301667	0.727273	88.633	1.14952	0.0021301	0.123037	1.5467	1.56478
MAX_AZ_Acq62-Sc1D_crop20-4	3.1621	0.0930149	0.207086	10.751	0.315044	6.24803	1.91628	1.25311	1.03541	5.59316	0.848328	0.0192667	0.863333	0.595745	169.952	1.25478	0.00326094	0.44863	1.14504	1.41463
MAX_AZ_Acq62-Sc1D_crop25-2	3.22707	0.0863121	0.068992	11.5859	0.259425	5.83168	1.84362	1.5553	0.988233	9.39888	0.903836	0.0205667	0.823333	1.32432	145.277	1.24828	0.00311129	0.0657418	2.81014	2.85908
MAX_AZ_Acq62-Sc1D_crop26-2	3.31935	0.0776123	0.11681	12.8846	0.324548	7.25157	1.65893	1.40517	0.987923	7.85069	0.887015	0.0283222	0.775	0.865385	180.028	1.31528	0.00464733	0.12048	2.19816	2.27955
MAX_AZ_Acq62-Sc1G_crop01-3	3.27181	0.0819785	0.0705054	12.1983	0.286112	6.65505	2.2264	1.87134	1.01996	8.11682	0.890313	0.0216778	1.04667	0.880952	152.099	1.25971	0.003373	0.384876	2.55189	4.87899
MAX_AZ_Acq62-Sc1G_crop05-2	3.36158	0.0739291	0.0410649	13.5265	0.19773	6.34911	1.69162	1.50071	1.05558	16.2672	0.942087	0.0222556	1.12	2.4	186.353	1.27075	0.00304228	0.223439	1.58817	1.8962
MAX_AZ_Acq62-Sc1G_crop07-1	3.16347	0.0928686	0.0862187	10.7679	0.297703	6.27985	2.10861	1.58948	1.06887	8.67164	0.896605	0.0216	0.823333	0.634615	164.828	1.26797	0.00351042	0.416358	2.07053	2.6708
MAX_AZ_Acq62-Sc1G_crop08-3	3.24903	0.0841573	0.181384	11.8825	0.352691	6.64311	1.83357	1.21105	0.941382	7.03226	0.875502	0.0221333	0.623333	0.603448	165.966	1.25095	0.00373958	0.233921	1.26363	1.3015
MAX_AZ_Acq62-Sc1G_crop09-3	3.09588	0.100384	0.0925407	9.96174	0.319142	5.28475	2.92144	2.38725	0.939068	5.62925	0.849153	0.0216556	0.806667	0.789474	143.305	1.26466	0.0037399	0.176913	4.89866	8.23474
MAX_AZ_Acq62-Sc1G_crop11-2	3.41445	0.0695629	0.111797	14.3755	0.274755	7.54061	1.69129	1.11522	1.00072	8.3895	0.893498	0.0377667	2.36333	0.788235	299.048	1.36857	0.00608518	0.266277	1.14529	1.26809
MAX_AZ_Acq62-Sc1G_crop13-2	3.24251	0.0847912	0.0608687	11.7937	0.244555	6.05705	1.82561	1.31775	1.03854	12.5072	0.925966	0.0207111	0.995	0.878049	155.46	1.25878	0.00317452	0.439469	1.60516	1.70455
MAX_AZ_Acq62-Sc1G_crop15-1-2	2.62729	0.17217	0.161562	5.80821	0.323147	3.0559	2.21559	1.70937	0.925545	3.60484	0.782837	0.00634444	0.173333	2.2	38.3915	1.05475	0.000956218	0.436913	1.31802	4.10365
MAX_AZ_Acq62-Sc1G_crop15-3	2.91752	0.123266	0.105747	8.11251	0.367367	4.43318	2.8698	2.49628	0.901592	4.4058	0.815013	0.0124333	0.578333	0.769231	84.1327	1.14276	0.00208212	0.215569	5.56232	10.0927
MAX_AZ_Acq62-Sc1G_crop17-1	3.19898	0.0891486	0.237403	11.2172	0.314447	6.57613	1.47933	1.15773	1.04547	5.02612	0.834056	0.0179444	0.6	0.8	166.797	1.22727	0.00278407	0.324443	1.11009	1.11302
MAX_AZ_Acq62-Sc1G_crop18-2	3.02373	0.109079	0.127896	9.16769	0.305923	5.1991	1.85696	1.43954	1.02533	6.62195	0.8688	0.0138889	0.236667	1.03571	103.956	1.1921	0.00213124	0.141421	1.36451	2.09714
MAX_AZ_Acq62-Sc1G_crop19-3	3.10986	0.0987816	0.100141	10.1233	0.329305	5.60536	3.10462	1.90511	0.964897	5.72874	0.851384	0.0184667	0.626667	0.595238	135.579	1.22058	0.00305928	0.173448	4.19165	4.45636
MAX_AZ_Acq62-Sc1G_crop22-2	3.08538	0.101605	0.154134	9.84207	0.264569	4.94	1.83091	1.38954	0.975822	4.19917	0.807662	0.0139222	0.62	1	109.574	1.17537	0.00211656	0.446678	1.47389	2.15176
MAX_AZ_Acq62-Sc1G_crop26-3	3.27689	0.0815006	0.164221	12.2698	0.262671	6.70149	1.57512	1.22235	1.06568	5.73913	0.851613	0.0189444	0.748333	1.53333	166.711	1.2322	0.00288246	0.267496	1.33568	1.47214
MAX_AZ_Acq62-Sc1G_crop29-1	3.33519	0.0762092	0.10843	13.1218	0.291395	7.27389	1.92523	1.37498	1.02691	8.49213	0.89465	0.0267889	1.17667	0.791045	238.335	1.32867	0.00429587	0.162926	1.17497	1.95524
MAX_AZ_Acq63-Sc2D_crop01-3	3.17671	0.0914636	0.126671	10.9333	0.295148	5.99615	1.75352	1.54526	1.00949	6.42202	0.865266	0.0179778	0.481667	1.44	99.3779	1.22088	0.0028715	0.0555899	2.31239	2.53058
MAX_AZ_Acq63-Sc2D_crop06-2	3.16525	0.0926786	0.0753337	10.79	0.280177	5.66239	2.13902	1.88459	0.991432	7.51064	0.8825	0.0133333	0.648333	1.30303	125.803	1.19457	0.00187368	0.710047	1.7007	3.43356
MAX_AZ_Acq63-Sc2D_crop09-2	3.1983	0.0892184	0.109095	11.2085	0.303137	6.52124	1.56347	1.11741	1.05673	10.6581	0.914222	0.0200778	0.665	1.21429	171.967	1.2495	0.00310449	0.305819	1.27138	1.29529
MAX_AZ_Acq63-Sc2D_crop13-5	3.3235	0.0772424	0.103974	12.9463	0.29875	6.9932	1.62202	1.22041	0.988275	10.4034	0.912307	0.0223	0.68	1.09524	170.661	1.28195	0.00347559	0.13393	1.19427	1.46435
MAX_AZ_Acq63-Sc2D_crop15-5	3.20946	0.0880794	0.0516672	11.3534	0.229329	5.43071	2.02223	1.61755	0.998854	10.8	0.915254	0.0144222	0.663333	2.88889	109.698	1.2223	0.0019289	0.306579	2.04275	2.8907
MAX_AZ_Acq63-Sc2D_crop16-3	3.12096	0.0975269	0.126507	10.2536	0.243681	5.35484	1.74372	1.29318	1.05794	4.90751	0.830724	0.0113556	0.486667	1.21429	85.2309	1.14322	0.00163963	0.364791	1.45211	2.12829
MAX_AZ_Acq63-Sc2D_crop17-2	3.23738	0.0852933	0.0456254	11.7242	0.294436	6.29861	2.13301	1.48652	0.990067	15.2821	0.938583	0.0211667	0.946667	1.51429	144.331	1.26188	0.00322236	0.27684	2.26153	2.93292
MAX_AZ_Acq63-Sc2D_crop18-2	3.29818	0.0795275	0.0853023	12.5743	0.309127	7.75877	1.59028	1.29995	1.10979	12.6957	0.926984	0.0175	0.568333	1.51613	135.025	1.23221	0.00259783	0.0563436	1.49115	1.67096
MAX_AZ_Acq63-Sc2D_crop19-3	2.79686	0.141636	0.227085	7.06033	0.37518	4.21084	2.60451	1.89824	0.973698	3.28571	0.766667	0.00866667	0.145	1.07143	54.1806	1.07848	0.00136865	0.308013	2.34558	3.73397
MAX_AZ_Acq63-Sc2D_crop20-3	3.23873	0.0851605	0.0306423	11.7425	0.256586	6.02583	2.02636	1.77596	1.01307	19.25	0.950617	0.0171	0.951667	1.325	145.895	1.22078	0.00234738	0.210201	3.25741	3.2953
MAX_AZ_Acq63-Sc2D_crop22-3	3.21097	0.0879263	0.134475	11.3732	0.295932	6.76037	1.42981	1.30114	1.09268	7.17284	0.877644	0.0147111	0.348333	1	99.4836	1.20002	0.00216791	0.33994	1.51038	1.54234
MAX_AZ_Acq63-Sc2D_crop23-4	3.27032	0.0821196	0.0657387	12.1774	0.238593	6.58333	1.78473	1.52158	1.10679	9.52597	0.904997	0.0180111	0.673333	1.26471	149.301	1.24357	0.00255318	0.322888	1.85291	2.83479
MAX_AZ_Acq63-Sc2D_crop25-3	2.86286	0.131273	0.221643	7.61773	0.343494	4.31395	1.79994	1.15938	0.966252	4.76336	0.82649	0.00838889	0.161667	0.8	57.8526	1.11606	0.00132836	0.21221	1.73228	1.73403
MAX_AZ_Acq63-Sc2D_crop26-5	3.30362	0.0790305	0.155742	12.6533	0.305068	7.50365	1.41292	1.13092	1.07367	6.81041	0.871966	0.0233444	0.658333	1.28571	159.76	1.28322	0.00370834	0.18512	1.45566	1.4945
MAX_AZ_Acq63-Sc2D_crop27-5	2.73692	0.151755	0.254471	6.58958	0.349935	4.09877	1.46373	1.16159	1.05148	4.31579	0.811881	0.00897778	0.305	0.947368	52.7378	1.07968	0.00148396	0.380529	1.67497	1.72487
MAX_AZ_Acq63-Sc2D_crop33-2	3.27344	0.0818252	0.115638	12.2212	0.299104	7.31646	1.59935	1.28817	1.09465	7.01	0.875156	0.0178	0.388333	1.34483	136.212	1.22588	0.00270892	0.0900825	2.43143	2.5985
MAX_AZ_Acq63-Sc2D_crop35-3	3.4474	0.0669734	0.0274517	14.9313	0.262192	7.88415	2.06549	1.76963	1.03121	21.5189	0.955593	0.0265222	1.79167	1.60784	219.756	1.30868	0.00376299	0.307019	3.85433	3.90451
MAX_AZ_Acq63-Sc2D_crop36-1	3.20616	0.0884144	0.0854176	11.3104	0.239687	5.3875	2.1724	1.68297	0.972946	6.17241	0.860577	0.0115556	0.66	1.28	101.904	1.19387	0.0015666	0.18081	1.43367	2.71734
MAX_AZ_Acq63-Sc2D_crop41-6	3.28677	0.0805787	0.111728	12.4102	0.297559	6.94257	1.6439	1.08283	1.02554	9.19626	0.901925	0.0242444	0.736667	0.945455	166.834	1.28208	0.00375079	0.210843	1.28356	1.35257
MAX_AZ_Acq63-Sc2D_crop42-3	3.35653	0.0743601	0.048789	13.4481	0.268603	7.69504	1.36303	1.13335	1.10407	15.576	0.939672	0.0230222	0.928333	0.842105	201.272	1.2789	0.00335349	0.245618	1.73362	1.76624
MAX_AZ_Acq63-Sc2G_crop04-4	3.19994	0.0890504	0.121074	11.2296	0.278894	5.96996	1.96902	1.6246	1.00667	4.84211	0.828829	0.0135667	0.606667	1.28	103.092	1.17985	0.00198009	0.489865	1.69477	3.1434
MAX_AZ_Acq63-Sc2G_crop15-4	3.24021	0.0850156	0.0742258	11.7625	0.216946	5.94077	1.60951	1.26572	1.08434	7.53061	0.882775	0.0185778	0.865	1.92308	125.271	1.23967	0.00261635	0.422173	1.17685	2.50759
MAX_AZ_Acq63-Sc2G_crop19-3	3.2514	0.0839272	0.0824523	11.9151	0.287284	6.93625	1.8666	1.56265	1.08611	8.93567	0.899353	0.0188778	0.823333	1.14286	146.42	1.25369	0.00276606	0.293143	2.55149	2.82328
MAX_AZ_Acq63-Sc2G_crop22-2	3.48168	0.0643821	0.0666544	15.5323	0.260189	8.70845	1.60092	1.18709	1.09916	14.0153	0.933401	0.0327	1.66667	1.15714	241.207	1.3498	0.00482402	0.185253	1.15054	1.46119
MAX_AZ_Acq63-Sc2G_crop24-4	3.22764	0.0862552	0.0880146	11.5935	0.316856	6.88934	1.94318	1.71273	1.05568	8.14208	0.890616	0.0185889	0.82	0.717391	150.154	1.24303	0.00292758	0.394977	2.5111	3.23711
MAX_AZ_Acq63-Sc2G_crop34-2	3.36899	0.0733013	0.111085	13.6423	0.309306	7.98917	1.55741	1.19991	1.05298	9.84974	0.907832	0.0232667	0.763333	1.23636	196.381	1.2781	0.00352954	0.264051	1.3459	1.46243
MAX_AZ_Acq63-Sc2G_crop38-1	3.2166	0.0873587	0.0474824	11.4471	0.286836	6.08421	1.61246	1.33897	0.992415	19.2889	0.950712	0.0202889	1.10667	1.15094	163.646	1.25149	0.00312218	0.119326	1.54344	2.13502
MAX_AZ_Acq63-Sc2G_crop42-6	3.42135	0.0690129	0.0588578	14.49	0.291353	8.09494	1.97076	1.57202	1.03498	12.7017	0.927016	0.0275556	1.10833	0.87013	247.945	1.31226	0.00424806	0.134704	3.29976	3.31983
MAX_AZ_Acq63-Sc2G_crop44-5	3.29838	0.0795085	0.0519309	12.5773	0.248451	6.3373	1.94042	1.59373	1.01088	12.7957	0.927514	0.0142556	0.671667	1.41935	100.021	1.23028	0.0019052	0.7837	1.01713	1.9894
MAX_AZ_Acq63-Sc2G_crop48-4	3.01483	0.110202	0.169588	9.07427	0.343934	5.68473	1.85234	1.72788	1.06822	5.80952	0.853147	0.0143	0.4	1	102.209	1.17768	0.00247268	0	2.71057	2.8521
MAX_CT_Acq64-Sc1D_crop01-2	3.55006	0.059508	0.0812546	16.8045	0.306364	9.71353	1.45631	1.28566	1.04432	12.792	0.927494	0.0419889	1.64167	1.01235	299.166	1.39223	0.00660611	0.0876013	1.6854	1.68548
MAX_CT_Acq64-Sc1D_crop02-1	3.70848	0.0495867	0.0799408	20.1667	0.290862	11.4486	1.65963	1.43868	1.05263	13.0659	0.928906	0.0522	2.75167	0.824818	445.927	1.45151	0.00816246	0.237502	1.48886	1.64047
MAX_CT_Acq64-Sc1D_crop06-1	3.64372	0.0534253	0.0426759	18.7177	0.209396	8.7689	1.47885	1.11113	1.02378	21.0235	0.954594	0.0416	2.225	1.67188	297.992	1.40291	0.00574244	0.131762	1.0604	1.07438
MAX_CT_Acq64-Sc1D_crop08-3	3.40205	0.0705639	0.0467872	14.1716	0.286805	8.4497	1.62742	1.38671	1.11335	19.2	0.950495	0.0359111	1.93333	0.659341	303.762	1.35961	0.00580091	0.196661	1.99202	2.04795
MAX_CT_Acq64-Sc1D_crop10-1	3.46024	0.0659909	0.0637968	15.1536	0.350574	8.75584	2.05697	1.76693	0.97587	12.1267	0.923819	0.0437556	1.50167	0.576577	321.21	1.39971	0.00742576	0.156945	1.74038	3.67943
MAX_CT_Acq64-Sc1D_crop14-2	3.5128	0.062116	0.0350885	16.0989	0.246362	7.59867	2.60817	2.08071	0.950943	12.3556	0.925125	0.0400667	1.73333	0.969072	337.446	1.38273	0.0061579	0.105322	4.27595	5.12379
MAX_CT_Acq64-Sc1G_crop03-2	3.57939	0.0575318	0.0437328	17.3817	0.268377	9.21758	1.63904	1.38971	1.02365	18.6314	0.949061	0.0514778	2.79833	0.954128	376.119	1.42942	0.00808823	0.153385	1.53128	2.12173
MAX_CT_Acq64-Sc1G_crop04	3.47655	0.0647632	0.0593157	15.4409	0.259369	8.44974	1.6545	1.42573	1.07451	12.7854	0.92746	0.0378333	1.545	0.835165	307.228	1.37588	0.00576705	0.266593	2.35389	2.39752
MAX_CT_Acq64-Sc1G_crop05-3	3.5028	0.0628351	0.0557838	15.9147	0.323955	9.4403	1.36393	1.22723	1.04219	18.5043	0.948729	0.0502778	1.79167	0.602941	363.382	1.41915	0.00845882	0.263424	1.23841	1.72823
MAX_CT_Acq64-Sc1G_crop06-1	3.49738	0.0632288	0.106372	15.8156	0.325626	9.38356	1.61408	1.34938	1.03974	8.952	0.899518	0.0414667	1.45	0.642857	271.679	1.3931	0.00706753	0.140814	2.12573	2.1532
MAX_CT_Acq64-Sc1G_crop07-3	3.55375	0.0592555	0.0686967	16.8761	0.251662	9.155	1.6659	1.35164	1.08138	11.2451	0.918335	0.0416333	1.865	1.33824	306.518	1.39649	0.00631226	0.265938	1.9158	2.01462
MAX_CT_Acq64-Sc1G_crop08-1	3.50732	0.0625095	0.0757636	15.9976	0.292855	8.5601	2.01087	1.82692	0.988778	8.04358	0.889424	0.0438111	2.17333	0.852941	306.044	1.39831	0.0072968	0.159253	3.83339	4.25905
MAX_CT_Acq64-Sc1G_crop10-2	3.58578	0.0571107	0.0669097	17.5099	0.256063	9.45	1.53065	1.15043	1.06654	12.3347	0.925007	0.0371889	2.00167	0.742268	326.885	1.37376	0.00554743	0.122224	1.45901	1.58846
MAX_CT_Acq64-Sc1G_crop11-1	3.16067	0.0931682	0.106997	10.7333	0.278072	5.61017	2.04786	1.68366	0.991209	6.24904	0.862051	0.0210222	0.643333	1.59375	142.443	1.2737	0.00332962	0.175087	1.45234	3.33222
MAX_CT_Acq64-Sc1G_crop12-2	3.32606	0.0770148	0.122884	12.9845	0.286831	6.89241	1.75825	1.36998	0.991133	6.93972	0.874051	0.0248778	1.02667	0.960784	203.455	1.30036	0.00407771	0.165058	1.11029	2.08446
MAX_CT_Acq64-Sc1G_crop13-2	3.40185	0.0705795	0.0618486	14.1684	0.263398	7.7628	1.35894	1.07739	1.06756	15.1176	0.937956	0.0365333	2.57833	0.663158	293.873	1.37692	0.00575447	0.703009	1.25609	1.3896
MAX_CT_Acq64-Sc1G_crop14-1	3.63394	0.0540302	0.0450912	18.5082	0.282911	11.0838	1.263	1.12885	1.1259	22.6788	0.957768	0.0434111	2.035	0.932039	339.425	1.40751	0.00639701	0.222258	1.32865	1.37255
MAX_CT_Acq64-Sc1G_crop15-1	3.45217	0.0666069	0.043666	15.0135	0.226135	6.99187	2.74106	2.08493	0.979328	8.71074	0.897021	0.0261111	2.06333	1.92683	206.016	1.30987	0.00361089	0.471304	5.71585	5.7445
MAX_CT_Acq64-Sc1G_crop16	3.38203	0.0722089	0.0850259	13.8487	0.26336	7.40118	1.66139	1.54263	1.0414	8.4296	0.893951	0.0290222	1.15	0.969231	209.85	1.32426	0.00438928	0.0586995	1.72671	2.39587
MAX_CT_Acq64-Sc1G_crop17-2	3.53162	0.0607846	0.0497277	16.4515	0.225005	7.87112	1.76812	1.30516	1.00863	13.0881	0.929018	0.0355333	2.67167	1.63158	211.662	1.36157	0.00521841	0.326062	1.64663	2.01975
MAX_CT_Acq64-Sc1G_crop18-1	3.30421	0.0789769	0.090267	12.6619	0.289241	6.95695	2.12781	1.62247	1.02162	6.96727	0.874487	0.0243444	0.92	1.45946	140.585	1.28745	0.00394078	0.303637	2.44592	3.28157
MAX_CT_Acq64-Sc1G_crop19-1	3.60795	0.0556714	0.0525398	17.9626	0.21431	8.35984	1.48052	1.07609	1.00533	12.9329	0.928227	0.0484556	4.52333	1.53521	300.546	1.41921	0.0071814	0.37978	1.44279	1.44347
MAX_CT_Acq64-Sc1G_crop20	3.67133	0.0517533	0.0568457	19.3224	0.248039	10.5012	1.58019	1.15476	1.09123	16.9115	0.94417	0.0449778	2.62667	1.02609	416.044	1.41551	0.006509	0.173604	1.14401	1.18809
MAX_CT_Acq64-Sc1G_crop21-2	3.56185	0.0587054	0.0803529	17.0342	0.28285	9.38211	1.5379	1.26973	1.03562	12.254	0.924551	0.0365222	1.42833	0.82716	283.988	1.36984	0.00563716	0.246669	1.20364	1.60528
MAX_CT_Acq64-Sc1G_crop22-1	3.47054	0.0652134	0.0459935	15.3343	0.276987	8.21038	1.73104	1.29647	1.01735	16.8713	0.944045	0.0339556	2.29667	0.865672	248.082	1.35033	0.00534757	0.345597	2.53537	2.62029
MAX_CT_Acq64-Sc1G_crop23	3.48145	0.0643988	0.0895902	15.5282	0.265176	8.54706	1.50761	1.23097	1.06888	10.1036	0.909939	0.0309667	1.15167	1.55357	220.035	1.34013	0.0045105	0.102007	1.38822	1.51374
MAX_CT_Acq64-Sc1G_crop26-1	3.50433	0.0627249	0.0892209	15.9426	0.309723	10.3444	1.76858	1.50441	1.1659	10.5172	0.913174	0.0482444	2.00167	0.891304	330.072	1.41741	0.00812248	0.0773823	2.27428	2.33758
MAX_CT_Acq64-Sc1G_crop28-1	3.39505	0.0711347	0.0893925	14.0578	0.275084	7.55255	1.39628	1.14695	1.02434	11.9289	0.922654	0.0283	0.996667	0.9375	216.327	1.31186	0.00442837	0.182682	1.18353	1.25522
MAX_CT_Acq64-Sc1G_crop30-5	3.42509	0.068716	0.0852854	14.5526	0.26097	7.67638	1.61717	1.2502	1.03257	10.0851	0.909789	0.0289444	1.58833	0.857143	215.707	1.33996	0.00439179	0.392345	1.42827	1.47123
MAX_CT_Acq64-Sc1G_crop33	3.33577	0.0761586	0.0395872	13.1305	0.226305	6.37805	1.57706	1.37145	1.02108	15.5574	0.939604	0.0224444	1.10667	1.43182	197.982	1.27141	0.00322823	0.113452	1.03897	3.04616
MAX_CT_Acq64-Sc1G_crop35-1	3.46734	0.0654535	0.0739353	15.278	0.24974	7.71353	1.44373	1.16956	1.01028	12.1045	0.923691	0.0320333	1.31333	1.025	263.075	1.35306	0.00486701	0.160211	1.5186	1.53426
MAX_CT_Acq64-Sc1G_crop37-1	3.43004	0.0683261	0.0213813	14.6357	0.219983	6.33565	3.29735	2.77414	0.922962	12.0047	0.923105	0.0309222	2.45833	0.730159	236.824	1.34249	0.0047009	0.113735	12.313	14.178
MAX_CT_Acq64-Sc1G_crop38-3	3.54766	0.0596723	0.0644393	16.7582	0.306154	9.69399	2.03787	1.63528	1.04546	12.2111	0.924306	0.0396333	2.39833	0.707071	331.852	1.39967	0.00634379	0.237971	2.22073	3.21876
MAX_CT_Acq64-Sc1G_crop39-1	3.53937	0.060245	0.0835754	16.5989	0.257255	8.30588	1.63209	1.16328	0.986563	9.80781	0.907474	0.0399889	2.495	0.877778	334.362	1.38249	0.00626788	0.252247	1.59185	1.85605
MAX_CT_Acq64-Sc1G_crop40-3	3.57402	0.057889	0.0227717	17.2744	0.187455	6.97872	2.39837	1.69719	0.93309	18.9236	0.949808	0.0318778	2.4	1.13846	314.67	1.35752	0.00437691	0.261374	2.75918	2.86222
MAX_CT_Acq65-Sc1G_crop11-2	3.23823	0.0852097	0.0669358	11.7357	0.351993	7.46696	1.62058	1.3249	1.07242	17.2418	0.945181	0.0184444	0.52	0.735849	169.698	1.26102	0.00295024	0.0884948	1.71995	1.79712
MAX_CT_Acq65-Sc1G_crop12-2	3.39907	0.0708064	0.0705053	14.123	0.322908	8.34948	1.89241	1.48747	1.04038	14.183	0.934137	0.0258111	0.818333	0.828571	216.865	1.31417	0.00401656	0.410789	1.65097	2.15716
MAX_CT_Acq65-Sc1G_crop14-6	3.3404	0.0757543	0.0678781	13.2006	0.250918	6.86007	1.67312	1.36605	1.03746	11.637	0.920867	0.0205	1.065	1.12727	170.995	1.26778	0.00297937	0.390261	1.59726	1.60229
MAX_CT_Acq65-Sc1G_crop16-2	3.03399	0.107797	0.126748	9.27667	0.262099	4.78641	1.66533	1.34934	1.00782	6.95575	0.874305	0.00998889	0.331667	3.5	69.6641	1.14163	0.00142033	0.137513	1.25839	1.6841
MAX_CT_Acq65-Sc1G_crop17-5	3.43578	0.0678761	0.0221357	14.7327	0.218284	6.71728	2.62606	1.96662	0.975887	17.0149	0.94449	0.0268222	1.98	1.40426	193.375	1.33175	0.00373868	0.346601	2.1511	5.41907
MAX_CT_Acq65-Sc1G_crop19-12	3.40999	0.0699216	0.0505226	14.3017	0.228482	7.42571	1.61864	1.14726	1.08623	14.7365	0.936454	0.0292	1.98167	0.780488	227.957	1.31978	0.00440095	0.203658	1.05003	1.5727
MAX_CT_Acq65-Sc1G_crop20-6	3.48505	0.0641329	0.0613446	15.5926	0.214654	7.33676	1.50493	1.08549	1.01558	13.4891	0.930983	0.0296222	1.18833	0.75	269.591	1.33705	0.00435044	0.0612449	1.31947	1.39946
MAX_CT_Acq65-Sc1G_crop26-7	3.58008	0.0574867	0.035342	17.3953	0.191224	7.36211	1.64982	1.35884	0.967829	17.0674	0.944652	0.0357333	2.56333	1.8871	235.588	1.36756	0.00489937	0.190737	1.21377	1.88496
MAX_CT_Acq65-Sc1G_crop27-4	3.3514	0.0748002	0.0388443	13.3689	0.221349	6.31118	1.8314	1.48934	1.0034	12.5874	0.926402	0.0215889	0.865	1.675	162	1.26836	0.0029617	0.286961	1.98698	3.35288
MAX_CT_Acq65-Sc1G_crop28-5	3.44445	0.0672014	0.0388875	14.8806	0.208073	6.85215	1.92076	1.52408	1.00948	14.5667	0.93576	0.0259444	1.675	0.78125	227.471	1.31486	0.00362137	0.435079	1.35052	1.96687
MAX_CT_Acq65-Sc1G_crop29-4	3.42412	0.0687931	0.0334197	14.5363	0.238072	6.65274	2.16942	1.65935	0.937975	14	0.933333	0.0271667	1.625	1.13115	193.206	1.33158	0.00388248	0.383718	2.28162	3.55203
MAX_CT_Acq65-Sc1G_crop30-3	3.37845	0.0725071	0.0466493	13.7917	0.222537	6.50418	1.86858	1.38299	0.999706	12.5774	0.926348	0.0253444	1.555	2.20588	155.928	1.26828	0.00356834	0.470525	1.01927	2.1539
MAX_CT_Acq65-Sc1G_crop34-4	3.59066	0.0567905	0.0319743	17.6086	0.209619	8.26914	1.45082	1.16977	1.0257	24.2713	0.960429	0.0362222	1.63167	1.14286	294.347	1.37085	0.00502078	0.315742	1.26103	1.51073
MAX_CT_Acq65-Sc1G_crop39-5	3.46084	0.0659452	0.0569362	15.1641	0.264079	8.26946	1.42967	1.12136	1.06119	15.8153	0.94053	0.0293333	1.38	0.827586	277.447	1.33462	0.00434334	0.183609	1.20265	1.56448
MAX_CT_Acq65-Sc1G_crop41-4	3.25825	0.0832686	0.0694389	12.0093	0.20952	5.80357	1.62847	1.22512	1.05576	9.71324	0.906658	0.0161889	0.788333	1.25	126.014	1.2176	0.00228884	0.314378	1.51559	1.65994
MAX_CT_Acq65-Sc1G_crop44-2	3.34145	0.0756624	0.08012	13.2166	0.244503	6.19497	1.72729	1.14292	0.947932	10.7867	0.915158	0.0196444	1.00167	1.07843	156.371	1.24412	0.00291434	0.191741	1.41086	1.42527
MAX_CT_Acq65-Sc1G_crop45-6	3.40263	0.0705168	0.0352761	14.181	0.286848	6.85792	2.79436	1.91806	0.90294	18.1769	0.947854	0.0277	1.36833	0.852941	212.13	1.26202	0.0041356	0.198268	1.08616	3.64265
MAX_CT_Acq65-Sc1G_crop47-6	3.37768	0.0725711	0.046446	13.7796	0.240224	7.10794	2.05009	1.69186	1.05244	12.0497	0.92337	0.0233444	0.893333	1.19608	175.802	1.28579	0.00332854	0.0308533	1.43754	2.98394
MAX_CT_Acq65-Sc1G_crop48-2	3.55475	0.0591877	0.0247169	16.8954	0.220386	8.26448	1.53828	1.32365	1.04197	27.0467	0.964345	0.0333444	1.55833	1.64706	259.142	1.3612	0.00441323	0.0983028	1.45812	1.88514
MAX_CT_Acq65-Sc1G_crop49-2	3.59374	0.0565892	0.0429074	17.6712	0.229346	8.22927	1.83533	1.37798	0.972409	15.9649	0.941055	0.0322333	2.12	1.76786	281.09	1.36527	0.00433607	0.0946701	1.70503	1.80614
MAX_CT_Acq65-Sc1G_crop52-4	3.4977	0.0632058	0.0490381	15.8213	0.229819	7.91667	2.20487	1.7845	1.04378	10.8468	0.915589	0.0326444	1.93333	1.20513	289.847	1.34399	0.00475929	0.140504	1.37742	4.13166
MAX_CT_Acq66-Sc2D_crop04-6	3.53615	0.0604688	0.0431391	16.5375	0.283531	8.48463	1.74358	1.18945	0.963527	23.6579	0.959445	0.0416444	2.45167	0.978723	323.76	1.38939	0.00649562	0.22217	1.12896	1.55387
MAX_CT_Acq66-Sc2D_crop13-3	3.64275	0.0534845	0.0494157	18.697	0.26355	9.47357	1.40527	1.06274	0.986984	21.1632	0.95488	0.0467889	2.675	0.972477	381.776	1.41486	0.00698035	0.214085	1.06095	1.16518
MAX_CT_Acq66-Sc2D_crop14-9	3.49355	0.0635083	0.0515838	15.746	0.295033	8.89412	1.54753	1.22558	1.03991	18.8528	0.949629	0.0509556	3.09	0.867257	368.608	1.42569	0.00845852	0.264154	1.37171	1.76327
MAX_CT_Acq66-Sc2D_crop15-4	3.63408	0.0540213	0.029917	18.5112	0.315588	11.1724	1.8437	1.52936	1.07437	26.1053	0.963107	0.0457778	1.925	1.05051	340.283	1.40929	0.00697283	0.0696733	2.35427	2.69819
MAX_CT_Acq66-Sc2D_crop23-5	3.41771	0.0693026	0.0550011	14.4295	0.247716	7	1.96472	1.40839	0.974698	10.6047	0.913828	0.0277222	1.43833	1.4717	213.686	1.31602	0.00412794	0.256381	2.13764	2.44064
MAX_CT_Acq66-Sc2D_crop27-5	3.5381	0.0603331	0.0483059	16.5746	0.286138	8.9927	1.35852	1.10001	1.01428	22.8373	0.958049	0.0439667	3.57667	1.33721	277.137	1.4003	0.00667011	0.48349	1.10295	1.27841
MAX_CT_Acq66-Sc2D_crop28-6	3.36419	0.0737074	0.0436212	13.5672	0.296253	7.98489	1.50637	1.35337	1.08131	21.3704	0.955298	0.0335556	1.205	0.916667	240.516	1.34305	0.00539591	0.146708	2.38532	2.38876
MAX_CT_Acq66-Sc2D_crop29-5	3.54416	0.0599135	0.0217516	16.6907	0.237052	8.07124	1.75581	1.46197	0.993215	34.1711	0.971568	0.0297	1.57167	1.39189	260.179	1.3387	0.0041078	0.079749	1.36432	2.32005
MAX_CT_Acq66-Sc2D_crop31-9	3.61972	0.0549218	0.0366293	18.2077	0.288439	10.0969	1.65565	1.30978	1.03253	25.2516	0.961907	0.0463778	1.79833	0.942857	334.566	1.40794	0.00717602	0.0558079	1.84542	1.94596
MAX_CT_Acq66-Sc2D_crop32-10	3.54301	0.0599928	0.0542835	16.6687	0.340191	10.0925	1.84485	1.53531	1.0381	16.0521	0.941356	0.0363778	2.68333	0.960526	271.65	1.37817	0.00572624	0.398531	2.5468	2.59967
MAX_CT_Acq66-Sc2D_crop41-4	3.63343	0.0540616	0.0319709	18.4974	0.246548	8.87354	2.12758	1.63911	0.966128	18.08	0.947589	0.0371	2.05667	1.11765	324.326	1.36947	0.00533531	0.302233	3.13969	3.29097
MAX_CT_Acq66-Sc2D_crop44-5	3.42208	0.0689547	0.0770353	14.5023	0.277615	8.85526	1.52899	1.05987	1.15889	16.0311	0.941284	0.0304667	1.06833	0.806452	186.608	1.32755	0.0048586	0.189051	1.01759	1.05715
MAX_CT_Acq66-Sc2G_crop01-4	3.54104	0.0601294	0.0665384	16.6308	0.244635	8.2982	1.47823	1.09388	1.00882	14.4536	0.93529	0.0333111	1.71333	1.08	247.464	1.34669	0.00500622	0.336762	1.09947	1.27777
MAX_CT_Acq66-Sc2G_crop02-7	3.58521	0.057148	0.0375119	17.4984	0.210133	7.68499	2.25142	1.87042	0.958068	20.7342	0.95399	0.0381556	4.25167	0.802198	293.162	1.32397	0.00578234	0.485671	2.32679	2.38077
MAX_CT_Acq66-Sc2G_crop07-6	3.40961	0.069952	0.0443862	14.2955	0.286788	6.73827	3.0297	2.04494	0.880174	13.4279	0.93069	0.0322222	2.28667	0.768293	262.677	1.37719	0.00514424	0.317859	3.09744	4.48813
MAX_CT_Acq66-Sc2G_crop10-1	3.67664	0.0514382	0.0290189	19.4408	0.276436	9.99572	1.67471	1.18836	0.977919	30.8611	0.968614	0.0509778	3.21833	0.715278	401.041	1.43336	0.00786121	0.198073	1.34103	1.69096
MAX_CT_Acq66-Sc2G_crop12-4	3.42045	0.0690843	0.0671251	14.4751	0.249763	6.86458	2.14307	1.70842	0.948919	9.99583	0.909056	0.0293222	1.675	1.39623	187.12	1.32668	0.004429	0.0870553	1.12031	2.96035
MAX_CT_Acq66-Sc2G_crop14-3	3.58778	0.0569788	0.0516776	17.5504	0.275241	9.00475	2.00713	1.42856	0.977977	17.8477	0.946943	0.0412556	2.27167	0.836364	328.065	1.38652	0.00646351	0.105082	1.83736	1.85709
MAX_CT_Acq66-Sc2G_crop15-4	3.52404	0.0613174	0.0539332	16.3086	0.221892	7.83971	1.49898	1.28473	1.0205	13.9442	0.933084	0.0357	2.14833	1.14103	290.357	1.36044	0.00527537	0.0882094	1.89964	1.98235
MAX_CT_Acq66-Sc2G_crop20-4	3.56279	0.0586421	0.0449678	17.0526	0.237913	8.51786	1.64447	1.19598	1.02407	17.8333	0.946903	0.0339	2.62333	1.56522	237.882	1.36148	0.00480865	0.34965	1.05825	1.6158
MAX_CT_Acq66-Sc2G_crop24-3	3.77122	0.0461311	0.0249578	21.6774	0.195637	9.78053	1.61291	1.14908	1.02007	28.2632	0.965827	0.0494222	2.99833	1.40566	416.101	1.43399	0.00663441	0.0335276	1.35146	1.51955
MAX_CT_Acq66-Sc2G_crop26-5	3.61374	0.0553013	0.0444182	18.0828	0.233757	9.10667	1.57007	1.28405	1.04163	17.4932	0.945926	0.0454111	2.80667	1.34091	326.21	1.35426	0.0063921	0.034977	2.05597	2.06026
MAX_CT_Acq66-Sc2G_crop27-8	3.65706	0.0526111	0.040035	19.0074	0.28081	10.7355	1.47872	1.21167	1.06584	23.1806	0.958645	0.0609889	3.62667	0.951724	472.021	1.46384	0.00935842	0.278258	1.36021	1.68603
MAX_CT_Acq66-Sc2G_crop29-4	3.74055	0.0477894	0.0367838	20.9252	0.253665	10.8962	1.36177	1.15789	1.03389	21.9492	0.956425	0.0601778	4.16667	1.2381	427.441	1.46815	0.00862462	0.178724	1.02638	1.56275
MAX_CT_Acq66-Sc2G_crop37-4	3.66969	0.0518513	0.038698	19.2859	0.243087	9.65789	1.81172	1.43594	1.01569	18.3254	0.948255	0.0541111	3.315	1.11009	385.352	1.44346	0.00795852	0.226572	2.24802	2.24842
MAX_CT_Acq66-Sc2G_crop38-5	3.65437	0.0527737	0.0443334	18.9488	0.249461	10.2723	1.74887	1.39151	1.08538	16.5899	0.943149	0.0424111	3.06167	1.24742	346.58	1.39951	0.00605562	0.291348	2.1496	2.15552
MAX_CT_Acq66-Sc2G_crop39-4	3.55076	0.0594598	0.0490907	16.8181	0.245384	8.41627	1.93771	1.42534	1.01023	15.4245	0.939115	0.0386889	2.44	1.47692	265.634	1.3776	0.00577917	0.166906	1.45925	1.90779
MAX_CT_Acq66-Sc2G_crop41-1	3.42524	0.0687045	0.064275	14.5551	0.26276	8.03892	1.46641	1.2781	1.07747	12.8163	0.927622	0.0300889	1.02	1.39286	242.819	1.33548	0.00425747	0.0429695	1.10243	1.71317
MAX_CT_Acq66-Sc2G_crop46-5	3.33345	0.0763621	0.0671889	13.0955	0.27825	7.01375	1.71174	1.50122	1.01534	9.50543	0.904811	0.0214778	0.848333	1.28889	174.848	1.30812	0.00317029	0.359628	1.18583	3.76731
MAX_CT_Acq66-Sc2G_crop47-2	3.42664	0.0685941	0.0489442	14.5785	0.253217	7.31776	1.70798	1.524	0.997513	13.5493	0.931268	0.0229556	1.13167	1.23404	181.539	1.28089	0.00322143	0.17183	1.96423	2.37711
MAX_CT_Acq66-Sc2G_crop52-6	3.4054	0.0702922	0.0386967	14.2263	0.226131	6.90556	1.58269	1.11798	1.02077	18.1339	0.947737	0.027	1.49333	1.13115	242.946	1.30706	0.00386274	0.118287	1.82603	1.89393
MAX_CT_Acq66-Sc2G_crop53-3	3.45743	0.0662051	0.0240142	15.1046	0.188174	6.26866	2.51912	1.70324	0.956722	17.0081	0.94447	0.0246111	2.125	1.53333	195.793	1.33257	0.00324727	0.484523	1.98436	4.02137
MAX_CT_Acq66-Sc2G_crop54-5	3.29266	0.0800343	0.0422494	12.4946	0.22323	5.96753	2.27828	1.74995	1.01087	11.1268	0.917538	0.0191333	1.345	1.3871	145.823	1.25692	0.00269047	0.161655	3.11604	3.94267
MAX_CT_Acq66-Sc2G_crop55-3	3.21087	0.0879363	0.044037	11.3719	0.208129	5.2847	2.12845	1.60394	1.01864	9.94355	0.908622	0.0150778	0.878333	1.48485	133.687	1.21839	0.00198001	0.138419	1.51114	3.03329

## Sheet: input_MorphoCellSorter
microglia	PerimeterAreaRatio	ModifiedCircularity	RoundnessFactor	RamificationIndex	Solidity	Convexity	ConvexHullRadiiRatio	SpanRatio	ConvexHullCircularity	ProcessesSomaAreasRatio	ProcessesCellAreasRatio	Density	BranchingIndex	EndpointsBranchpointsRatio	SkeletonProcessesRatio	FractalDimension	LacunaritySlope	PolarizationIndex	Linearity	Inertia
MAX_AZ_Acq43-Sc1D_crop01-2	3.39814	14.1081	23.1271	14.1081	4.67362	5.86553	0.0432392	0.0432392	0.898807	9.00435	0.900043	0.0255667	1.93667	1.57143	243.409	1.29751	0.00359225	0.121557	2.52808	5.35478
MAX_AZ_Acq43-Sc1D_crop02-1	3.29358	12.5079	29.6301	12.5079	3.43589	7.10922	0.0337495	0.0337495	1.05356	17.7034	0.946534	0.0245222	2.56167	0.734375	202.873	1.28777	0.00371278	1.06623	3.81375	3.89225
MAX_AZ_Acq43-Sc1D_crop06-1	2.74963	6.6867	1.96218	6.6867	2.05545	5	0.509637	0.509637	1.07204	2.46128	0.711089	0.0114222	0.04	0.6875	54.7196	1.13689	0.00211971	0.0441081	1.98556	1.98981
MAX_AZ_Acq43-Sc1D_crop07-1	2.83982	7.41833	2.43473	7.41833	2.57732	4.85311	0.410723	0.410723	1.05026	2.47557	0.712277	0.0118556	0.0516667	0.483871	82.2368	1.1397	0.0021555	0.0432945	1.33369	2.23929
MAX_AZ_Acq43-Sc1D_crop08-2	3.1768	10.9343	10.4672	10.9343	3.01843	6.64609	0.0955363	0.0955363	1.056	12.3538	0.925115	0.0192889	0.958333	0.607143	153.186	1.23654	0.0031472	0.532904	1.31509	1.37681
MAX_AZ_Acq43-Sc1D_crop14-1	3.15635	10.6799	7.46835	10.6799	3.53745	6.17992	0.133898	0.133898	1.08833	8.75641	0.897503	0.0169111	0.455	1.12821	135.989	1.22877	0.0026331	0.298925	1.15771	1.31682
MAX_AZ_Acq43-Sc1D_crop15-2	3.1588	10.7102	7.36381	10.7102	3.42311	6.36842	0.135799	0.135799	1.10013	8.03676	0.889341	0.0136556	0.321667	1.09677	124.575	1.17221	0.00210215	0.0902036	1.42149	1.4222
MAX_AZ_Acq43-Sc1D_crop17-1	2.87131	7.69215	5.4878	7.69215	2.83298	4.61712	0.182222	0.182222	1.01029	3.78983	0.791224	0.0157	0.398333	0.666667	95.6431	1.19053	0.0027683	0.170342	4.36022	4.3804
MAX_AZ_Acq43-Sc1D_crop20-1	3.18895	11.0884	8.92156	11.0884	3.11748	6.19623	0.112088	0.112088	0.98664	6.72124	0.870487	0.0193889	1.16667	0.481481	142.96	1.24171	0.0032036	0.258938	3.03455	3.3586
MAX_AZ_Acq43-Sc1D_crop21-1	2.5603	5.37708	1.64262	5.37708	2.97092	3.00746	0.608782	0.608782	0.964049	1.44262	0.590604	0.00496667	0.0716667	0.6	26.0947	1.0141	0.000766933	0.369412	1.16241	1.17016
MAX_AZ_Acq43-Sc1D_crop24-1	1.91683	2.56336	0.766809	2.56336	1.27679	2.51852	1.30411	1.30411	1.11018	0.611511	0.379464	0.00248889	0	1	3.4	0.840057	0.000430221	0.149404	1.78428	2.80542
MAX_AZ_Acq43-Sc1D_crop24-2	2.21551	3.61533	1.91029	3.61533	1.79452	2.84416	0.523481	0.523481	1.05385	1.7037	0.630137	0.00324444	0	0	3.67391	0.902543	0.000533582	0.117041	1.78437	3.20723
MAX_AZ_Acq43-Sc1D_crop25-3	2.99079	8.82653	13.4703	8.82653	2.78116	4.84236	0.0742374	0.0742374	0.914914	9.07143	0.900709	0.0109667	0.538333	0.857143	83.8346	1.20525	0.00170466	0.271959	1.0157	4.89816
MAX_AZ_Acq43-Sc1D_crop26-2	2.68377	6.1984	4.33533	6.1984	2.51179	4.1844	0.230663	0.230663	1.0699	4.86179	0.829404	0.00801111	0.0816667	0.909091	44.9766	1.07238	0.00134057	0.166551	1.58992	2.02062
MAX_AZ_Acq43-Sc1D_crop27-1	2.77563	6.88986	2.92928	6.88986	2.01167	4.96528	0.341381	0.341381	1.02214	2.63136	0.724621	0.00952222	0.198333	0.695652	72.3736	1.13236	0.00171947	0.241543	4.1752	4.47881
MAX_AZ_Acq43-Sc1D_crop28-2	2.81519	7.21093	4.25706	7.21093	3.17176	3.9881	0.234904	0.234904	0.984973	3.54967	0.780204	0.00763333	0.158333	1.25	63.1642	1.07311	0.00118965	0.170623	1.13546	2.41936
MAX_AZ_Acq43-Sc1D_crop40-2	3.24418	11.8164	6.52164	11.8164	3.30457	6.893	0.153336	0.153336	1.06043	5.74684	0.851782	0.0177667	0.586667	0.916667	157.393	1.2261	0.00286383	0.127515	2.2518	2.27276
MAX_AZ_Acq43-Sc1D_crop45-2	2.65684	6.0092	2.92152	6.0092	2.20939	4.10241	0.342288	0.342288	1.01475	2.88593	0.742661	0.0113556	0.0583333	0.684211	58.6574	1.13081	0.00211959	0.0442374	1.05442	3.01242
MAX_AZ_Acq43-Sc1D_crop47-2	2.75736	6.74643	4.8343	6.74643	2.90496	3.64943	0.206855	0.206855	0.921978	3.40625	0.77305	0.00783333	0.121667	0.545455	44.6532	1.06707	0.00124463	0.219606	2.96038	2.9695
MAX_AZ_Acq43-Sc1D_crop49-1	3.13267	10.3928	16.9158	10.3928	4.10339	5.18298	0.0591164	0.0591164	1.01023	6.28667	0.862763	0.0121444	0.81	3.33333	72.7932	1.1663	0.00168219	0.570709	4.26789	5.98998
MAX_AZ_Acq43-Sc1D_crop54-2	3.08784	9.86995	7.66637	9.86995	3.97575	4.70817	0.13044	0.13044	0.951146	5.83429	0.853679	0.0132889	0.415	1.2	95.3418	1.18206	0.00200908	0.155716	1.85314	2.33902
MAX_AZ_Acq43-Sc1G_crop02-1	3.35033	13.3524	12.4433	13.3524	3.5618	7.7033	0.0803646	0.0803646	1.08881	12.0728	0.923506	0.0219333	0.676667	1.64865	168.966	1.27204	0.00322665	0.0711748	1.39884	1.5334
MAX_AZ_Acq43-Sc1G_crop07-1	3.28954	12.4498	13.0769	12.4498	3.6428	6.43188	0.0764706	0.0764706	0.986034	7.56949	0.883307	0.0280889	1.235	0.627451	198.041	1.32652	0.00463491	0.127351	1.42874	4.31852
MAX_AZ_Acq43-Sc1G_crop12-1	3.49347	15.7445	18.8906	15.7445	4.00288	7.50136	0.0529365	0.0529365	0.953226	11.0446	0.916975	0.0270333	1.43167	1.07407	245.45	1.30608	0.00394676	0.0286711	3.43881	3.71187
MAX_AZ_Acq43-Sc1G_crop13-1	3.18351	11.0191	9.60414	11.0191	4.40155	5.35636	0.104122	0.104122	1.01982	7.46429	0.881857	0.0158	0.446667	1.41667	113.341	1.2277	0.00228391	0.0265186	1.6022	1.73071
MAX_AZ_Acq43-Sc1G_crop14-2	3.08705	9.86101	9.982	9.86101	4.31758	4.83077	0.10018	0.10018	1.01792	5.29756	0.841208	0.0143444	0.698333	1.45455	93.116	1.19302	0.00213335	0.111326	3.72691	4.11574
MAX_AZ_Acq43-Sc1G_crop16-2	3.24482	11.825	3.28809	11.825	3.00431	7.04044	0.304128	0.304128	1.03198	4.24372	0.809296	0.0231889	0.49	0.490196	193.038	1.27	0.00389705	0.0218896	1.07022	1.07343
MAX_AZ_Acq43-Sc1G_crop17-2	3.39347	14.0324	16.1162	14.0324	4.05176	7.31818	0.0620492	0.0620492	1.04977	9.07265	0.900721	0.0261889	1.33333	1.39535	179.898	1.29832	0.00392592	0.125291	2.80303	3.41653
MAX_AZ_Acq43-Sc1G_crop18-1	2.62118	5.76748	6.57874	5.76748	3.01042	3.13609	0.152005	0.152005	0.943444	2.12558	0.68006	0.00746667	0.433333	0.857143	38.1269	1.08833	0.00120743	0.588835	8.00444	8.53471
MAX_AZ_Acq43-Sc1G_crop20-3	3.37112	13.6758	10.9113	13.6758	4.0575	6.67135	0.0916478	0.0916478	0.98263	8.33852	0.892917	0.0266667	1.26667	1.33333	172.498	1.2983	0.00405097	0.303452	1.35124	1.95592
MAX_AZ_Acq62-Sc1D_crop01-1	3.2257	11.5677	11.268	11.5677	3.80144	5.98675	0.0887472	0.0887472	1.00907	6.04348	0.858025	0.0216	1.05167	0.591837	170.317	1.25253	0.00351208	0.315087	3.61587	5.11308
MAX_AZ_Acq62-Sc1D_crop03-5	3.11619	10.1974	7.02013	10.1974	3.62308	5.44403	0.142447	0.142447	1.01618	5.46429	0.845304	0.0181	0.553333	1.27586	112.163	1.23993	0.00292506	0.0783501	1.98992	2.10085
MAX_AZ_Acq62-Sc1D_crop06-2	3.2426	11.795	12.6459	11.795	4.34087	5.58788	0.0790771	0.0790771	0.987051	8.39614	0.893573	0.0216111	1.11167	0.57377	202.33	1.25229	0.00333245	0.0641335	1.05558	1.93806
MAX_AZ_Acq62-Sc1D_crop07-1	3.24211	11.7883	11.8924	11.7883	3.86375	6.2406	0.084087	0.084087	1.04059	9.66216	0.90621	0.0175333	0.611667	1.8	141.608	1.23127	0.00256459	0.207587	1.66623	1.81291
MAX_AZ_Acq62-Sc1D_crop08-2	3.06236	9.58459	3.37849	9.58459	2.64444	6.30045	0.29599	0.29599	1.06897	3.4186	0.773684	0.019	0.231667	1.09091	125.207	1.22608	0.00339432	0.0241825	2.24862	2.29973
MAX_AZ_Acq62-Sc1D_crop09-3	3.30141	12.6212	12.1147	12.6212	3.64789	6.74627	0.0825446	0.0825446	1.0209	9.08025	0.900796	0.0181444	0.466667	1.21212	138.888	1.2246	0.0027182	0.139985	2.21644	2.32725
MAX_AZ_Acq62-Sc1D_crop10-1	2.74301	6.63593	2.42503	6.63593	2.65836	4.46405	0.412366	0.412366	1.09682	2.3189	0.698695	0.00936667	0.126667	1.14286	44.5569	1.12467	0.00157291	0.351239	1.66461	1.92974
MAX_AZ_Acq62-Sc1D_crop14-3	2.8514	7.51785	4.72489	7.51785	3.18434	3.94737	0.211645	0.211645	0.936966	3.55172	0.780303	0.0088	0.305	0.761905	58.4142	1.11591	0.00139756	0.433741	1.19554	2.13277
MAX_AZ_Acq62-Sc1D_crop15-2	2.92482	8.181	11.6868	8.181	3.14976	4.64179	0.0855669	0.0855669	1.00697	11.7778	0.921739	0.0115	0.571667	1.27273	81.0105	1.15265	0.0018788	0.422781	1.66402	1.72637
MAX_AZ_Acq62-Sc1D_crop16-4	3.38576	13.9083	11.5908	13.9083	3.88604	7.52866	0.0862756	0.0862756	1.06708	9.79343	0.907351	0.0255444	1.53	0.868852	212.635	1.28638	0.00387397	0.356997	1.37439	1.49478
MAX_AZ_Acq62-Sc1D_crop17-2	3.18329	11.0164	12.1088	11.0164	2.94074	6.9322	0.0825849	0.0825849	1.0791	11.1034	0.917379	0.0195	0.816667	0.906977	144.9	1.23648	0.00313769	0.430331	2.23015	2.62985
MAX_AZ_Acq62-Sc1D_crop19-1	2.94527	8.37584	3.98504	8.37584	3.20659	4.87745	0.250938	0.250938	1.04276	4.2723	0.810329	0.0124778	0.301667	0.727273	88.633	1.14952	0.0021301	0.123037	1.5467	1.56478
MAX_AZ_Acq62-Sc1D_crop20-4	3.1621	10.751	4.82891	10.751	3.17416	6.24803	0.207086	0.207086	1.03541	5.59316	0.848328	0.0192667	0.863333	0.595745	169.952	1.25478	0.00326094	0.44863	1.14504	1.41463
MAX_AZ_Acq62-Sc1D_crop25-2	3.22707	11.5859	14.4944	11.5859	3.85467	5.83168	0.068992	0.068992	0.988233	9.39888	0.903836	0.0205667	0.823333	1.32432	145.277	1.24828	0.00311129	0.0657418	2.81014	2.85908
MAX_AZ_Acq62-Sc1D_crop26-2	3.31935	12.8846	8.5609	12.8846	3.08121	7.25157	0.11681	0.11681	0.987923	7.85069	0.887015	0.0283222	0.775	0.865385	180.028	1.31528	0.00464733	0.12048	2.19816	2.27955
MAX_AZ_Acq62-Sc1G_crop01-3	3.27181	12.1983	14.1833	12.1983	3.49513	6.65505	0.0705054	0.0705054	1.01996	8.11682	0.890313	0.0216778	1.04667	0.880952	152.099	1.25971	0.003373	0.384876	2.55189	4.87899
MAX_AZ_Acq62-Sc1G_crop05-2	3.36158	13.5265	24.3517	13.5265	5.05741	6.34911	0.0410649	0.0410649	1.05558	16.2672	0.942087	0.0222556	1.12	2.4	186.353	1.27075	0.00304228	0.223439	1.58817	1.8962
MAX_AZ_Acq62-Sc1G_crop07-1	3.16347	10.7679	11.5984	10.7679	3.35905	6.27985	0.0862187	0.0862187	1.06887	8.67164	0.896605	0.0216	0.823333	0.634615	164.828	1.26797	0.00351042	0.416358	2.07053	2.6708
MAX_AZ_Acq62-Sc1G_crop08-3	3.24903	11.8825	5.51316	11.8825	2.83534	6.64311	0.181384	0.181384	0.941382	7.03226	0.875502	0.0221333	0.623333	0.603448	165.966	1.25095	0.00373958	0.233921	1.26363	1.3015
MAX_AZ_Acq62-Sc1G_crop09-3	3.09588	9.96174	10.8061	9.96174	3.1334	5.28475	0.0925407	0.0925407	0.939068	5.62925	0.849153	0.0216556	0.806667	0.789474	143.305	1.26466	0.0037399	0.176913	4.89866	8.23474
MAX_AZ_Acq62-Sc1G_crop11-2	3.41445	14.3755	8.9448	14.3755	3.6396	7.54061	0.111797	0.111797	1.00072	8.3895	0.893498	0.0377667	2.36333	0.788235	299.048	1.36857	0.00608518	0.266277	1.14529	1.26809
MAX_AZ_Acq62-Sc1G_crop13-2	3.24251	11.7937	16.4288	11.7937	4.08906	6.05705	0.0608687	0.0608687	1.03854	12.5072	0.925966	0.0207111	0.995	0.878049	155.46	1.25878	0.00317452	0.439469	1.60516	1.70455
MAX_AZ_Acq62-Sc1G_crop15-1-2	2.62729	5.80821	6.18958	5.80821	3.09457	3.0559	0.161562	0.161562	0.925545	3.60484	0.782837	0.00634444	0.173333	2.2	38.3915	1.05475	0.000956218	0.436913	1.31802	4.10365
MAX_AZ_Acq62-Sc1G_crop15-3	2.91752	8.11251	9.45658	8.11251	2.72207	4.43318	0.105747	0.105747	0.901592	4.4058	0.815013	0.0124333	0.578333	0.769231	84.1327	1.14276	0.00208212	0.215569	5.56232	10.0927
MAX_AZ_Acq62-Sc1G_crop17-1	3.19898	11.2172	4.21225	11.2172	3.18019	6.57613	0.237403	0.237403	1.04547	5.02612	0.834056	0.0179444	0.6	0.8	166.797	1.22727	0.00278407	0.324443	1.11009	1.11302
MAX_AZ_Acq62-Sc1G_crop18-2	3.02373	9.16769	7.81886	9.16769	3.2688	5.1991	0.127896	0.127896	1.02533	6.62195	0.8688	0.0138889	0.236667	1.03571	103.956	1.1921	0.00213124	0.141421	1.36451	2.09714
MAX_AZ_Acq62-Sc1G_crop19-3	3.10986	10.1233	9.98592	10.1233	3.0367	5.60536	0.100141	0.100141	0.964897	5.72874	0.851384	0.0184667	0.626667	0.595238	135.579	1.22058	0.00305928	0.173448	4.19165	4.45636
MAX_AZ_Acq62-Sc1G_crop22-2	3.08538	9.84207	6.48788	9.84207	3.77973	4.94	0.154134	0.154134	0.975822	4.19917	0.807662	0.0139222	0.62	1	109.574	1.17537	0.00211656	0.446678	1.47389	2.15176
MAX_AZ_Acq62-Sc1G_crop26-3	3.27689	12.2698	6.08936	12.2698	3.80704	6.70149	0.164221	0.164221	1.06568	5.73913	0.851613	0.0189444	0.748333	1.53333	166.711	1.2322	0.00288246	0.267496	1.33568	1.47214
MAX_AZ_Acq62-Sc1G_crop29-1	3.33519	13.1218	9.2225	13.1218	3.43177	7.27389	0.10843	0.10843	1.02691	8.49213	0.89465	0.0267889	1.17667	0.791045	238.335	1.32867	0.00429587	0.162926	1.17497	1.95524
MAX_AZ_Acq63-Sc2D_crop01-3	3.17671	10.9333	7.89445	10.9333	3.38813	5.99615	0.126671	0.126671	1.00949	6.42202	0.865266	0.0179778	0.481667	1.44	99.3779	1.22088	0.0028715	0.0555899	2.31239	2.53058
MAX_AZ_Acq63-Sc2D_crop06-2	3.16525	10.79	13.2743	10.79	3.56917	5.66239	0.0753337	0.0753337	0.991432	7.51064	0.8825	0.0133333	0.648333	1.30303	125.803	1.19457	0.00187368	0.710047	1.7007	3.43356
MAX_AZ_Acq63-Sc2D_crop09-2	3.1983	11.2085	9.16634	11.2085	3.29884	6.52124	0.109095	0.109095	1.05673	10.6581	0.914222	0.0200778	0.665	1.21429	171.967	1.2495	0.00310449	0.305819	1.27138	1.29529
MAX_AZ_Acq63-Sc2D_crop13-5	3.3235	12.9463	9.6178	12.9463	3.34728	6.9932	0.103974	0.103974	0.988275	10.4034	0.912307	0.0223	0.68	1.09524	170.661	1.28195	0.00347559	0.13393	1.19427	1.46435
MAX_AZ_Acq63-Sc2D_crop15-5	3.20946	11.3534	19.3546	11.3534	4.36055	5.43071	0.0516672	0.0516672	0.998854	10.8	0.915254	0.0144222	0.663333	2.88889	109.698	1.2223	0.0019289	0.306579	2.04275	2.8907
MAX_AZ_Acq63-Sc2D_crop16-3	3.12096	10.2536	7.90471	10.2536	4.10372	5.35484	0.126507	0.126507	1.05794	4.90751	0.830724	0.0113556	0.486667	1.21429	85.2309	1.14322	0.00163963	0.364791	1.45211	2.12829
MAX_AZ_Acq63-Sc2D_crop17-2	3.23738	11.7242	21.9176	11.7242	3.39633	6.29861	0.0456254	0.0456254	0.990067	15.2821	0.938583	0.0211667	0.946667	1.51429	144.331	1.26188	0.00322236	0.27684	2.26153	2.93292
MAX_AZ_Acq63-Sc2D_crop18-2	3.29818	12.5743	11.723	12.5743	3.23492	7.75877	0.0853023	0.0853023	1.10979	12.6957	0.926984	0.0175	0.568333	1.51613	135.025	1.23221	0.00259783	0.0563436	1.49115	1.67096
MAX_AZ_Acq63-Sc2D_crop19-3	2.79686	7.06033	4.40364	7.06033	2.66538	4.21084	0.227085	0.227085	0.973698	3.28571	0.766667	0.00866667	0.145	1.07143	54.1806	1.07848	0.00136865	0.308013	2.34558	3.73397
MAX_AZ_Acq63-Sc2D_crop20-3	3.23873	11.7425	32.6346	11.7425	3.89734	6.02583	0.0306423	0.0306423	1.01307	19.25	0.950617	0.0171	0.951667	1.325	145.895	1.22078	0.00234738	0.210201	3.25741	3.2953
MAX_AZ_Acq63-Sc2D_crop22-3	3.21097	11.3732	7.43631	11.3732	3.37915	6.76037	0.134475	0.134475	1.09268	7.17284	0.877644	0.0147111	0.348333	1	99.4836	1.20002	0.00216791	0.33994	1.51038	1.54234
MAX_AZ_Acq63-Sc2D_crop23-4	3.27032	12.1774	15.2117	12.1774	4.19124	6.58333	0.0657387	0.0657387	1.10679	9.52597	0.904997	0.0180111	0.673333	1.26471	149.301	1.24357	0.00255318	0.322888	1.85291	2.83479
MAX_AZ_Acq63-Sc2D_crop25-3	2.86286	7.61773	4.51176	7.61773	2.91126	4.31395	0.221643	0.221643	0.966252	4.76336	0.82649	0.00838889	0.161667	0.8	57.8526	1.11606	0.00132836	0.21221	1.73228	1.73403
MAX_AZ_Acq63-Sc2D_crop26-5	3.30362	12.6533	6.42086	12.6533	3.27796	7.50365	0.155742	0.155742	1.07367	6.81041	0.871966	0.0233444	0.658333	1.28571	159.76	1.28322	0.00370834	0.18512	1.45566	1.4945
MAX_AZ_Acq63-Sc2D_crop27-5	2.73692	6.58958	3.92972	6.58958	2.85767	4.09877	0.254471	0.254471	1.05148	4.31579	0.811881	0.00897778	0.305	0.947368	52.7378	1.07968	0.00148396	0.380529	1.67497	1.72487
MAX_AZ_Acq63-Sc2D_crop33-2	3.27344	12.2212	8.64767	12.2212	3.34332	7.31646	0.115638	0.115638	1.09465	7.01	0.875156	0.0178	0.388333	1.34483	136.212	1.22588	0.00270892	0.0900825	2.43143	2.5985
MAX_AZ_Acq63-Sc2D_crop35-3	3.4474	14.9313	36.4276	14.9313	3.81399	7.88415	0.0274517	0.0274517	1.03121	21.5189	0.955593	0.0265222	1.79167	1.60784	219.756	1.30868	0.00376299	0.307019	3.85433	3.90451
MAX_AZ_Acq63-Sc2D_crop36-1	3.20616	11.3104	11.7072	11.3104	4.17212	5.3875	0.0854176	0.0854176	0.972946	6.17241	0.860577	0.0115556	0.66	1.28	101.904	1.19387	0.0015666	0.18081	1.43367	2.71734
MAX_AZ_Acq63-Sc2D_crop41-6	3.28677	12.4102	8.95035	12.4102	3.36068	6.94257	0.111728	0.111728	1.02554	9.19626	0.901925	0.0242444	0.736667	0.945455	166.834	1.28208	0.00375079	0.210843	1.28356	1.35257
MAX_AZ_Acq63-Sc2D_crop42-3	3.35653	13.4481	20.4964	13.4481	3.72297	7.69504	0.048789	0.048789	1.10407	15.576	0.939672	0.0230222	0.928333	0.842105	201.272	1.2789	0.00335349	0.245618	1.73362	1.76624
MAX_AZ_Acq63-Sc2G_crop04-4	3.19994	11.2296	8.25944	11.2296	3.58559	5.96996	0.121074	0.121074	1.00667	4.84211	0.828829	0.0135667	0.606667	1.28	103.092	1.17985	0.00198009	0.489865	1.69477	3.1434
MAX_AZ_Acq63-Sc2G_crop15-4	3.24021	11.7625	13.4724	11.7625	4.60945	5.94077	0.0742258	0.0742258	1.08434	7.53061	0.882775	0.0185778	0.865	1.92308	125.271	1.23967	0.00261635	0.422173	1.17685	2.50759
MAX_AZ_Acq63-Sc2G_crop19-3	3.2514	11.9151	12.1282	11.9151	3.48087	6.93625	0.0824523	0.0824523	1.08611	8.93567	0.899353	0.0188778	0.823333	1.14286	146.42	1.25369	0.00276606	0.293143	2.55149	2.82328
MAX_AZ_Acq63-Sc2G_crop22-2	3.48168	15.5323	15.0028	15.5323	3.84336	8.70845	0.0666544	0.0666544	1.09916	14.0153	0.933401	0.0327	1.66667	1.15714	241.207	1.3498	0.00482402	0.185253	1.15054	1.46119
MAX_AZ_Acq63-Sc2G_crop24-4	3.22764	11.5935	11.3618	11.5935	3.15601	6.88934	0.0880146	0.0880146	1.05568	8.14208	0.890616	0.0185889	0.82	0.717391	150.154	1.24303	0.00292758	0.394977	2.5111	3.23711
MAX_AZ_Acq63-Sc2G_crop34-2	3.36899	13.6423	9.00215	13.6423	3.23305	7.98917	0.111085	0.111085	1.05298	9.84974	0.907832	0.0232667	0.763333	1.23636	196.381	1.2781	0.00352954	0.264051	1.3459	1.46243
MAX_AZ_Acq63-Sc2G_crop38-1	3.2166	11.4471	21.0605	11.4471	3.48631	6.08421	0.0474824	0.0474824	0.992415	19.2889	0.950712	0.0202889	1.10667	1.15094	163.646	1.25149	0.00312218	0.119326	1.54344	2.13502
MAX_AZ_Acq63-Sc2G_crop42-6	3.42135	14.49	16.9901	14.49	3.43226	8.09494	0.0588578	0.0588578	1.03498	12.7017	0.927016	0.0275556	1.10833	0.87013	247.945	1.31226	0.00424806	0.134704	3.29976	3.31983
MAX_AZ_Acq63-Sc2G_crop44-5	3.29838	12.5773	19.2564	12.5773	4.02494	6.3373	0.0519309	0.0519309	1.01088	12.7957	0.927514	0.0142556	0.671667	1.41935	100.021	1.23028	0.0019052	0.7837	1.01713	1.9894
MAX_AZ_Acq63-Sc2G_crop48-4	3.01483	9.07427	5.89666	9.07427	2.90754	5.68473	0.169588	0.169588	1.06822	5.80952	0.853147	0.0143	0.4	1	102.209	1.17768	0.00247268	0	2.71057	2.8521
MAX_CT_Acq64-Sc1D_crop01-2	3.55006	16.8045	12.307	16.8045	3.26409	9.71353	0.0812546	0.0812546	1.04432	12.792	0.927494	0.0419889	1.64167	1.01235	299.166	1.39223	0.00660611	0.0876013	1.6854	1.68548
MAX_CT_Acq64-Sc1D_crop02-1	3.70848	20.1667	12.5093	20.1667	3.43806	11.4486	0.0799408	0.0799408	1.05263	13.0659	0.928906	0.0522	2.75167	0.824818	445.927	1.45151	0.00816246	0.237502	1.48886	1.64047
MAX_CT_Acq64-Sc1D_crop06-1	3.64372	18.7177	23.4324	18.7177	4.77564	8.7689	0.0426759	0.0426759	1.02378	21.0235	0.954594	0.0416	2.225	1.67188	297.992	1.40291	0.00574244	0.131762	1.0604	1.07438
MAX_CT_Acq64-Sc1D_crop08-3	3.40205	14.1716	21.3734	14.1716	3.4867	8.4497	0.0467872	0.0467872	1.11335	19.2	0.950495	0.0359111	1.93333	0.659341	303.762	1.35961	0.00580091	0.196661	1.99202	2.04795
MAX_CT_Acq64-Sc1D_crop10-1	3.46024	15.1536	15.6748	15.1536	2.85246	8.75584	0.0637968	0.0637968	0.97587	12.1267	0.923819	0.0437556	1.50167	0.576577	321.21	1.39971	0.00742576	0.156945	1.74038	3.67943
MAX_CT_Acq64-Sc1D_crop14-2	3.5128	16.0989	28.4993	16.0989	4.05907	7.59867	0.0350885	0.0350885	0.950943	12.3556	0.925125	0.0400667	1.73333	0.969072	337.446	1.38273	0.0061579	0.105322	4.27595	5.12379
MAX_CT_Acq64-Sc1G_crop03-2	3.57939	17.3817	22.8661	17.3817	3.7261	9.21758	0.0437328	0.0437328	1.02365	18.6314	0.949061	0.0514778	2.79833	0.954128	376.119	1.42942	0.00808823	0.153385	1.53128	2.12173
MAX_CT_Acq64-Sc1G_crop04	3.47655	15.4409	16.8589	15.4409	3.85551	8.44974	0.0593157	0.0593157	1.07451	12.7854	0.92746	0.0378333	1.545	0.835165	307.228	1.37588	0.00576705	0.266593	2.35389	2.39752
MAX_CT_Acq64-Sc1G_crop05-3	3.5028	15.9147	17.9263	15.9147	3.08685	9.4403	0.0557838	0.0557838	1.04219	18.5043	0.948729	0.0502778	1.79167	0.602941	363.382	1.41915	0.00845882	0.263424	1.23841	1.72823
MAX_CT_Acq64-Sc1G_crop06-1	3.49738	15.8156	9.40097	15.8156	3.07101	9.38356	0.106372	0.106372	1.03974	8.952	0.899518	0.0414667	1.45	0.642857	271.679	1.3931	0.00706753	0.140814	2.12573	2.1532
MAX_CT_Acq64-Sc1G_crop07-3	3.55375	16.8761	14.5567	16.8761	3.97358	9.155	0.0686967	0.0686967	1.08138	11.2451	0.918335	0.0416333	1.865	1.33824	306.518	1.39649	0.00631226	0.265938	1.9158	2.01462
MAX_CT_Acq64-Sc1G_crop08-1	3.50732	15.9976	13.199	15.9976	3.41466	8.5601	0.0757636	0.0757636	0.988778	8.04358	0.889424	0.0438111	2.17333	0.852941	306.044	1.39831	0.0072968	0.159253	3.83339	4.25905
MAX_CT_Acq64-Sc1G_crop10-2	3.58578	17.5099	14.9455	17.5099	3.90529	9.45	0.0669097	0.0669097	1.06654	12.3347	0.925007	0.0371889	2.00167	0.742268	326.885	1.37376	0.00554743	0.122224	1.45901	1.58846
MAX_CT_Acq64-Sc1G_crop11-1	3.16067	10.7333	9.34603	10.7333	3.59619	5.61017	0.106997	0.106997	0.991209	6.24904	0.862051	0.0210222	0.643333	1.59375	142.443	1.2737	0.00332962	0.175087	1.45234	3.33222
MAX_CT_Acq64-Sc1G_crop12-2	3.32606	12.9845	8.13773	12.9845	3.48638	6.89241	0.122884	0.122884	0.991133	6.93972	0.874051	0.0248778	1.02667	0.960784	203.455	1.30036	0.00407771	0.165058	1.11029	2.08446
MAX_CT_Acq64-Sc1G_crop13-2	3.40185	14.1684	16.1685	14.1684	3.79653	7.7628	0.0618486	0.0618486	1.06756	15.1176	0.937956	0.0365333	2.57833	0.663158	293.873	1.37692	0.00575447	0.703009	1.25609	1.3896
MAX_CT_Acq64-Sc1G_crop14-1	3.63394	18.5082	22.1773	18.5082	3.53468	11.0838	0.0450912	0.0450912	1.1259	22.6788	0.957768	0.0434111	2.035	0.932039	339.425	1.40751	0.00639701	0.222258	1.32865	1.37255
MAX_CT_Acq64-Sc1G_crop15-1	3.45217	15.0135	22.9011	15.0135	4.42213	6.99187	0.043666	0.043666	0.979328	8.71074	0.897021	0.0261111	2.06333	1.92683	206.016	1.30987	0.00361089	0.471304	5.71585	5.7445
MAX_CT_Acq64-Sc1G_crop16	3.38203	13.8487	11.7611	13.8487	3.79709	7.40118	0.0850259	0.0850259	1.0414	8.4296	0.893951	0.0290222	1.15	0.969231	209.85	1.32426	0.00438928	0.0586995	1.72671	2.39587
MAX_CT_Acq64-Sc1G_crop17-2	3.53162	16.4515	20.1095	16.4515	4.44434	7.87112	0.0497277	0.0497277	1.00863	13.0881	0.929018	0.0355333	2.67167	1.63158	211.662	1.36157	0.00521841	0.326062	1.64663	2.01975
MAX_CT_Acq64-Sc1G_crop18-1	3.30421	12.6619	11.0782	12.6619	3.45733	6.95695	0.090267	0.090267	1.02162	6.96727	0.874487	0.0243444	0.92	1.45946	140.585	1.28745	0.00394078	0.303637	2.44592	3.28157
MAX_CT_Acq64-Sc1G_crop19-1	3.60795	17.9626	19.0332	17.9626	4.66613	8.35984	0.0525398	0.0525398	1.00533	12.9329	0.928227	0.0484556	4.52333	1.53521	300.546	1.41921	0.0071814	0.37978	1.44279	1.44347
MAX_CT_Acq64-Sc1G_crop20	3.67133	19.3224	17.5915	19.3224	4.03162	10.5012	0.0568457	0.0568457	1.09123	16.9115	0.94417	0.0449778	2.62667	1.02609	416.044	1.41551	0.006509	0.173604	1.14401	1.18809
MAX_CT_Acq64-Sc1G_crop21-2	3.56185	17.0342	12.4451	17.0342	3.53544	9.38211	0.0803529	0.0803529	1.03562	12.254	0.924551	0.0365222	1.42833	0.82716	283.988	1.36984	0.00563716	0.246669	1.20364	1.60528
MAX_CT_Acq64-Sc1G_crop22-1	3.47054	15.3343	21.7422	15.3343	3.61027	8.21038	0.0459935	0.0459935	1.01735	16.8713	0.944045	0.0339556	2.29667	0.865672	248.082	1.35033	0.00534757	0.345597	2.53537	2.62029
MAX_CT_Acq64-Sc1G_crop23	3.48145	15.5282	11.1619	15.5282	3.77108	8.54706	0.0895902	0.0895902	1.06888	10.1036	0.909939	0.0309667	1.15167	1.55357	220.035	1.34013	0.0045105	0.102007	1.38822	1.51374
MAX_CT_Acq64-Sc1G_crop26-1	3.50433	15.9426	11.2081	15.9426	3.2287	10.3444	0.0892209	0.0892209	1.1659	10.5172	0.913174	0.0482444	2.00167	0.891304	330.072	1.41741	0.00812248	0.0773823	2.27428	2.33758
MAX_CT_Acq64-Sc1G_crop28-1	3.39505	14.0578	11.1866	14.0578	3.63526	7.55255	0.0893925	0.0893925	1.02434	11.9289	0.922654	0.0283	0.996667	0.9375	216.327	1.31186	0.00442837	0.182682	1.18353	1.25522
MAX_CT_Acq64-Sc1G_crop30-5	3.42509	14.5526	11.7253	14.5526	3.83186	7.67638	0.0852854	0.0852854	1.03257	10.0851	0.909789	0.0289444	1.58833	0.857143	215.707	1.33996	0.00439179	0.392345	1.42827	1.47123
MAX_CT_Acq64-Sc1G_crop33	3.33577	13.1305	25.2607	13.1305	4.41881	6.37805	0.0395872	0.0395872	1.02108	15.5574	0.939604	0.0224444	1.10667	1.43182	197.982	1.27141	0.00322823	0.113452	1.03897	3.04616
MAX_CT_Acq64-Sc1G_crop35-1	3.46734	15.278	13.5253	15.278	4.00416	7.71353	0.0739353	0.0739353	1.01028	12.1045	0.923691	0.0320333	1.31333	1.025	263.075	1.35306	0.00486701	0.160211	1.5186	1.53426
MAX_CT_Acq64-Sc1G_crop37-1	3.43004	14.6357	46.7698	14.6357	4.54581	6.33565	0.0213813	0.0213813	0.922962	12.0047	0.923105	0.0309222	2.45833	0.730159	236.824	1.34249	0.0047009	0.113735	12.313	14.178
MAX_CT_Acq64-Sc1G_crop38-3	3.54766	16.7582	15.5185	16.7582	3.26633	9.69399	0.0644393	0.0644393	1.04546	12.2111	0.924306	0.0396333	2.39833	0.707071	331.852	1.39967	0.00634379	0.237971	2.22073	3.21876
MAX_CT_Acq64-Sc1G_crop39-1	3.53937	16.5989	11.9652	16.5989	3.88719	8.30588	0.0835754	0.0835754	0.986563	9.80781	0.907474	0.0399889	2.495	0.877778	334.362	1.38249	0.00626788	0.252247	1.59185	1.85605
MAX_CT_Acq64-Sc1G_crop40-3	3.57402	17.2744	43.9142	17.2744	5.33461	6.97872	0.0227717	0.0227717	0.93309	18.9236	0.949808	0.0318778	2.4	1.13846	314.67	1.35752	0.00437691	0.261374	2.75918	2.86222
MAX_CT_Acq65-Sc1G_crop11-2	3.23823	11.7357	14.9397	11.7357	2.84096	7.46696	0.0669358	0.0669358	1.07242	17.2418	0.945181	0.0184444	0.52	0.735849	169.698	1.26102	0.00295024	0.0884948	1.71995	1.79712
MAX_CT_Acq65-Sc1G_crop12-2	3.39907	14.123	14.1833	14.123	3.09686	8.34948	0.0705053	0.0705053	1.04038	14.183	0.934137	0.0258111	0.818333	0.828571	216.865	1.31417	0.00401656	0.410789	1.65097	2.15716
MAX_CT_Acq65-Sc1G_crop14-6	3.3404	13.2006	14.7323	13.2006	3.98537	6.86007	0.0678781	0.0678781	1.03746	11.637	0.920867	0.0205	1.065	1.12727	170.995	1.26778	0.00297937	0.390261	1.59726	1.60229
MAX_CT_Acq65-Sc1G_crop16-2	3.03399	9.27667	7.88965	9.27667	3.81535	4.78641	0.126748	0.126748	1.00782	6.95575	0.874305	0.00998889	0.331667	3.5	69.6641	1.14163	0.00142033	0.137513	1.25839	1.6841
MAX_CT_Acq65-Sc1G_crop17-5	3.43578	14.7327	45.1759	14.7327	4.58119	6.71728	0.0221357	0.0221357	0.975887	17.0149	0.94449	0.0268222	1.98	1.40426	193.375	1.33175	0.00373868	0.346601	2.1511	5.41907
MAX_CT_Acq65-Sc1G_crop19-12	3.40999	14.3017	19.7931	14.3017	4.37671	7.42571	0.0505226	0.0505226	1.08623	14.7365	0.936454	0.0292	1.98167	0.780488	227.957	1.31978	0.00440095	0.203658	1.05003	1.5727
MAX_CT_Acq65-Sc1G_crop20-6	3.48505	15.5926	16.3013	15.5926	4.65866	7.33676	0.0613446	0.0613446	1.01558	13.4891	0.930983	0.0296222	1.18833	0.75	269.591	1.33705	0.00435044	0.0612449	1.31947	1.39946
MAX_CT_Acq65-Sc1G_crop26-7	3.58008	17.3953	28.2949	17.3953	5.22948	7.36211	0.035342	0.035342	0.967829	17.0674	0.944652	0.0357333	2.56333	1.8871	235.588	1.36756	0.00489937	0.190737	1.21377	1.88496
MAX_CT_Acq65-Sc1G_crop27-4	3.3514	13.3689	25.7438	13.3689	4.51776	6.31118	0.0388443	0.0388443	1.0034	12.5874	0.926402	0.0215889	0.865	1.675	162	1.26836	0.0029617	0.286961	1.98698	3.35288
MAX_CT_Acq65-Sc1G_crop28-5	3.44445	14.8806	25.7152	14.8806	4.806	6.85215	0.0388875	0.0388875	1.00948	14.5667	0.93576	0.0259444	1.675	0.78125	227.471	1.31486	0.00362137	0.435079	1.35052	1.96687
MAX_CT_Acq65-Sc1G_crop29-4	3.42412	14.5363	29.9225	14.5363	4.20041	6.65274	0.0334197	0.0334197	0.937975	14	0.933333	0.0271667	1.625	1.13115	193.206	1.33158	0.00388248	0.383718	2.28162	3.55203
MAX_CT_Acq65-Sc1G_crop30-3	3.37845	13.7917	21.4365	13.7917	4.49364	6.50418	0.0466493	0.0466493	0.999706	12.5774	0.926348	0.0253444	1.555	2.20588	155.928	1.26828	0.00356834	0.470525	1.01927	2.1539
MAX_CT_Acq65-Sc1G_crop34-4	3.59066	17.6086	31.2751	17.6086	4.77055	8.26914	0.0319743	0.0319743	1.0257	24.2713	0.960429	0.0362222	1.63167	1.14286	294.347	1.37085	0.00502078	0.315742	1.26103	1.51073
MAX_CT_Acq65-Sc1G_crop39-5	3.46084	15.1641	17.5635	15.1641	3.78674	8.26946	0.0569362	0.0569362	1.06119	15.8153	0.94053	0.0293333	1.38	0.827586	277.447	1.33462	0.00434334	0.183609	1.20265	1.56448
MAX_CT_Acq65-Sc1G_crop41-4	3.25825	12.0093	14.4011	12.0093	4.77282	5.80357	0.0694389	0.0694389	1.05576	9.71324	0.906658	0.0161889	0.788333	1.25	126.014	1.2176	0.00228884	0.314378	1.51559	1.65994
MAX_CT_Acq65-Sc1G_crop44-2	3.34145	13.2166	12.4813	13.2166	4.08993	6.19497	0.08012	0.08012	0.947932	10.7867	0.915158	0.0196444	1.00167	1.07843	156.371	1.24412	0.00291434	0.191741	1.41086	1.42527
MAX_CT_Acq65-Sc1G_crop45-6	3.40263	14.181	28.3478	14.181	3.48616	6.85792	0.0352761	0.0352761	0.90294	18.1769	0.947854	0.0277	1.36833	0.852941	212.13	1.26202	0.0041356	0.198268	1.08616	3.64265
MAX_CT_Acq65-Sc1G_crop47-6	3.37768	13.7796	21.5304	13.7796	4.16278	7.10794	0.046446	0.046446	1.05244	12.0497	0.92337	0.0233444	0.893333	1.19608	175.802	1.28579	0.00332854	0.0308533	1.43754	2.98394
MAX_CT_Acq65-Sc1G_crop48-2	3.55475	16.8954	40.4582	16.8954	4.53749	8.26448	0.0247169	0.0247169	1.04197	27.0467	0.964345	0.0333444	1.55833	1.64706	259.142	1.3612	0.00441323	0.0983028	1.45812	1.88514
MAX_CT_Acq65-Sc1G_crop49-2	3.59374	17.6712	23.306	17.6712	4.36022	8.22927	0.0429074	0.0429074	0.972409	15.9649	0.941055	0.0322333	2.12	1.76786	281.09	1.36527	0.00433607	0.0946701	1.70503	1.80614
MAX_CT_Acq65-Sc1G_crop52-4	3.4977	15.8213	20.3923	15.8213	4.35126	7.91667	0.0490381	0.0490381	1.04378	10.8468	0.915589	0.0326444	1.93333	1.20513	289.847	1.34399	0.00475929	0.140504	1.37742	4.13166
MAX_CT_Acq66-Sc2D_crop04-6	3.53615	16.5375	23.1808	16.5375	3.52695	8.48463	0.0431391	0.0431391	0.963527	23.6579	0.959445	0.0416444	2.45167	0.978723	323.76	1.38939	0.00649562	0.22217	1.12896	1.55387
MAX_CT_Acq66-Sc2D_crop13-3	3.64275	18.697	20.2365	18.697	3.79435	9.47357	0.0494157	0.0494157	0.986984	21.1632	0.95488	0.0467889	2.675	0.972477	381.776	1.41486	0.00698035	0.214085	1.06095	1.16518
MAX_CT_Acq66-Sc2D_crop14-9	3.49355	15.746	19.3859	15.746	3.38945	8.89412	0.0515838	0.0515838	1.03991	18.8528	0.949629	0.0509556	3.09	0.867257	368.608	1.42569	0.00845852	0.264154	1.37171	1.76327
MAX_CT_Acq66-Sc2D_crop15-4	3.63408	18.5112	33.4258	18.5112	3.16869	11.1724	0.029917	0.029917	1.07437	26.1053	0.963107	0.0457778	1.925	1.05051	340.283	1.40929	0.00697283	0.0696733	2.35427	2.69819
MAX_CT_Acq66-Sc2D_crop23-5	3.41771	14.4295	18.1815	14.4295	4.03687	7	0.0550011	0.0550011	0.974698	10.6047	0.913828	0.0277222	1.43833	1.4717	213.686	1.31602	0.00412794	0.256381	2.13764	2.44064
MAX_CT_Acq66-Sc2D_crop27-5	3.5381	16.5746	20.7014	16.5746	3.49482	8.9927	0.0483059	0.0483059	1.01428	22.8373	0.958049	0.0439667	3.57667	1.33721	277.137	1.4003	0.00667011	0.48349	1.10295	1.27841
MAX_CT_Acq66-Sc2D_crop28-6	3.36419	13.5672	22.9246	13.5672	3.3755	7.98489	0.0436212	0.0436212	1.08131	21.3704	0.955298	0.0335556	1.205	0.916667	240.516	1.34305	0.00539591	0.146708	2.38532	2.38876
MAX_CT_Acq66-Sc2D_crop29-5	3.54416	16.6907	45.9737	16.6907	4.21848	8.07124	0.0217516	0.0217516	0.993215	34.1711	0.971568	0.0297	1.57167	1.39189	260.179	1.3387	0.0041078	0.079749	1.36432	2.32005
MAX_CT_Acq66-Sc2D_crop31-9	3.61972	18.2077	27.3006	18.2077	3.46694	10.0969	0.0366293	0.0366293	1.03253	25.2516	0.961907	0.0463778	1.79833	0.942857	334.566	1.40794	0.00717602	0.0558079	1.84542	1.94596
MAX_CT_Acq66-Sc2D_crop32-10	3.54301	16.6687	18.4218	16.6687	2.93952	10.0925	0.0542835	0.0542835	1.0381	16.0521	0.941356	0.0363778	2.68333	0.960526	271.65	1.37817	0.00572624	0.398531	2.5468	2.59967
MAX_CT_Acq66-Sc2D_crop41-4	3.63343	18.4974	31.2784	18.4974	4.056	8.87354	0.0319709	0.0319709	0.966128	18.08	0.947589	0.0371	2.05667	1.11765	324.326	1.36947	0.00533531	0.302233	3.13969	3.29097
MAX_CT_Acq66-Sc2D_crop44-5	3.42208	14.5023	12.9811	14.5023	3.60212	8.85526	0.0770353	0.0770353	1.15889	16.0311	0.941284	0.0304667	1.06833	0.806452	186.608	1.32755	0.0048586	0.189051	1.01759	1.05715
MAX_CT_Acq66-Sc2G_crop01-4	3.54104	16.6308	15.0289	16.6308	4.08773	8.2982	0.0665384	0.0665384	1.00882	14.4536	0.93529	0.0333111	1.71333	1.08	247.464	1.34669	0.00500622	0.336762	1.09947	1.27777
MAX_CT_Acq66-Sc2G_crop02-7	3.58521	17.4984	26.6582	17.4984	4.75888	7.68499	0.0375119	0.0375119	0.958068	20.7342	0.95399	0.0381556	4.25167	0.802198	293.162	1.32397	0.00578234	0.485671	2.32679	2.38077
MAX_CT_Acq66-Sc2G_crop07-6	3.40961	14.2955	22.5295	14.2955	3.4869	6.73827	0.0443862	0.0443862	0.880174	13.4279	0.93069	0.0322222	2.28667	0.768293	262.677	1.37719	0.00514424	0.317859	3.09744	4.48813
MAX_CT_Acq66-Sc2G_crop10-1	3.67664	19.4408	34.4604	19.4408	3.61748	9.99572	0.0290189	0.0290189	0.977919	30.8611	0.968614	0.0509778	3.21833	0.715278	401.041	1.43336	0.00786121	0.198073	1.34103	1.69096
MAX_CT_Acq66-Sc2G_crop12-4	3.42045	14.4751	14.8976	14.4751	4.00379	6.86458	0.0671251	0.0671251	0.948919	9.99583	0.909056	0.0293222	1.675	1.39623	187.12	1.32668	0.004429	0.0870553	1.12031	2.96035
MAX_CT_Acq66-Sc2G_crop14-3	3.58778	17.5504	19.3507	17.5504	3.63318	9.00475	0.0516776	0.0516776	0.977977	17.8477	0.946943	0.0412556	2.27167	0.836364	328.065	1.38652	0.00646351	0.105082	1.83736	1.85709
MAX_CT_Acq66-Sc2G_crop15-4	3.52404	16.3086	18.5415	16.3086	4.50669	7.83971	0.0539332	0.0539332	1.0205	13.9442	0.933084	0.0357	2.14833	1.14103	290.357	1.36044	0.00527537	0.0882094	1.89964	1.98235
MAX_CT_Acq66-Sc2G_crop20-4	3.56279	17.0526	22.2381	17.0526	4.20321	8.51786	0.0449678	0.0449678	1.02407	17.8333	0.946903	0.0339	2.62333	1.56522	237.882	1.36148	0.00480865	0.34965	1.05825	1.6158
MAX_CT_Acq66-Sc2G_crop24-3	3.77122	21.6774	40.0676	21.6774	5.11151	9.78053	0.0249578	0.0249578	1.02007	28.2632	0.965827	0.0494222	2.99833	1.40566	416.101	1.43399	0.00663441	0.0335276	1.35146	1.51955
MAX_CT_Acq66-Sc2G_crop26-5	3.61374	18.0828	22.5133	18.0828	4.27795	9.10667	0.0444182	0.0444182	1.04163	17.4932	0.945926	0.0454111	2.80667	1.34091	326.21	1.35426	0.0063921	0.034977	2.05597	2.06026
MAX_CT_Acq66-Sc2G_crop27-8	3.65706	19.0074	24.9782	19.0074	3.56112	10.7355	0.040035	0.040035	1.06584	23.1806	0.958645	0.0609889	3.62667	0.951724	472.021	1.46384	0.00935842	0.278258	1.36021	1.68603
MAX_CT_Acq66-Sc2G_crop29-4	3.74055	20.9252	27.1859	20.9252	3.94221	10.8962	0.0367838	0.0367838	1.03389	21.9492	0.956425	0.0601778	4.16667	1.2381	427.441	1.46815	0.00862462	0.178724	1.02638	1.56275
MAX_CT_Acq66-Sc2G_crop37-4	3.66969	19.2859	25.8411	19.2859	4.11376	9.65789	0.038698	0.038698	1.01569	18.3254	0.948255	0.0541111	3.315	1.11009	385.352	1.44346	0.00795852	0.226572	2.24802	2.24842
MAX_CT_Acq66-Sc2G_crop38-5	3.65437	18.9488	22.5564	18.9488	4.00865	10.2723	0.0443334	0.0443334	1.08538	16.5899	0.943149	0.0424111	3.06167	1.24742	346.58	1.39951	0.00605562	0.291348	2.1496	2.15552
MAX_CT_Acq66-Sc2G_crop39-4	3.55076	16.8181	20.3704	16.8181	4.07524	8.41627	0.0490907	0.0490907	1.01023	15.4245	0.939115	0.0386889	2.44	1.47692	265.634	1.3776	0.00577917	0.166906	1.45925	1.90779
MAX_CT_Acq66-Sc2G_crop41-1	3.42524	14.5551	15.5582	14.5551	3.80576	8.03892	0.064275	0.064275	1.07747	12.8163	0.927622	0.0300889	1.02	1.39286	242.819	1.33548	0.00425747	0.0429695	1.10243	1.71317
MAX_CT_Acq66-Sc2G_crop46-5	3.33345	13.0955	14.8834	13.0955	3.5939	7.01375	0.0671889	0.0671889	1.01534	9.50543	0.904811	0.0214778	0.848333	1.28889	174.848	1.30812	0.00317029	0.359628	1.18583	3.76731
MAX_CT_Acq66-Sc2G_crop47-2	3.42664	14.5785	20.4314	14.5785	3.94918	7.31776	0.0489442	0.0489442	0.997513	13.5493	0.931268	0.0229556	1.13167	1.23404	181.539	1.28089	0.00322143	0.17183	1.96423	2.37711
MAX_CT_Acq66-Sc2G_crop52-6	3.4054	14.2263	25.842	14.2263	4.42222	6.90556	0.0386967	0.0386967	1.02077	18.1339	0.947737	0.027	1.49333	1.13115	242.946	1.30706	0.00386274	0.118287	1.82603	1.89393
MAX_CT_Acq66-Sc2G_crop53-3	3.45743	15.1046	41.6421	15.1046	5.31422	6.26866	0.0240142	0.0240142	0.956722	17.0081	0.94447	0.0246111	2.125	1.53333	195.793	1.33257	0.00324727	0.484523	1.98436	4.02137
MAX_CT_Acq66-Sc2G_crop54-5	3.29266	12.4946	23.669	12.4946	4.47967	5.96753	0.0422494	0.0422494	1.01087	11.1268	0.917538	0.0191333	1.345	1.3871	145.823	1.25692	0.00269047	0.161655	3.11604	3.94267
MAX_CT_Acq66-Sc2G_crop55-3	3.21087	11.3719	22.7082	11.3719	4.80472	5.2847	0.044037	0.044037	1.01864	9.94355	0.908622	0.0150778	0.878333	1.48485	133.687	1.21839	0.00198001	0.138419	1.51114	3.03329
