# Supplementary material for: MorphoCellSorter is an Andrews plot-based sorting approach to rank microglia according to their morphological features
Source: eLife. 2025 May 19;13:RP101630. doi: 10.7554/eLife.101630 (PMC12088675; doi:10.7554/eLife.101630)
Supplement: Figure 5—source data 2. [file elife-101630-fig5-data2.xlsx]

## Sheet: statistics
Parameter	Condition	Mean	Std	p-value
Perimeter_Area	Control	3.4757	0.0600653	0.004401
	APPxPS1 -KI	3.11614	0.114756
Circularity	Control	0.0655979	0.00463373	0.004396
	APPxPS1 -KI	0.103968	0.0187957
Roundness_Factor	Control	0.0547077	0.010731	0.009238
	APPxPS1 -KI	0.156265	0.065833
Ramification_Index	Control	15.5989	1.06246	0.00465
	APPxPS1 -KI	10.6248	1.06432
Solidity	Control	0.255081	0.013227	0.0201
	APPxPS1 -KI	0.308635	0.0282906
Convexity	Control	8.01199	0.77233	0.000135
	APPxPS1 -KI	5.88565	0.561033
CH_Radii_Ratio	Control	1.80302	0.0356243	0.0905
	APPxPS1 -KI	1.91425	0.103431
Span_Ratio	Control	1.41703	0.0254204	0.1
	APPxPS1 -KI	1.49881	0.0551863
CH_Circularity	Control	1.01905	0.00991183	0.784
	APPxPS1 -KI	1.02275	0.0150122
Processes_Soma_Ratio	Control	15.3748	2.81009	0.01789
	APPxPS1 -KI	7.79899	1.89941
Processes_Cell_Ratio	Control	0.932357	0.0109633	0.015077
	APPxPS1 -KI	0.853938	0.041093
Density	Control	0.0335532	0.00651196	0.01454
	APPxPS1 -KI	0.0174285	0.00191264
Branching_Index	Control	1.8534	0.449381	0.0118
	APPxPS1 -KI	0.703778	0.0646933
Endpoints_Branchpoints	Control	1.17155	0.144371	0.490
	APPxPS1 -KI	1.09171	0.146561
Skeleton_Processes_Ratio	Control	259.126	44.4395	0.00986
	APPxPS1 -KI	131.717	17.1634
Fractal_Dimension	Control	1.34462	0.0382881	0.009
	APPxPS1 -KI	1.20982	0.0308999
Lacunarity	Control	0.005024	0.00112307	0.02556
	APPxPS1 -KI	0.00271091	0.000301421
Polarization_Index	Control	0.224713	0.010876	0.193
	APPxPS1 -KI	0.253535	0.0287969
Linearity	Control	1.81439	0.370629	0.360278
	APPxPS1 -KI	2.10421	0.231513
Inertia	Control	2.41985	0.216409	0.26
	APPxPS1 -KI	2.75892	0.355546
