# Supplementary material for: MorphoCellSorter is an Andrews plot-based sorting approach to rank microglia according to their morphological features
Source: eLife. 2025 May 19;13:RP101630. doi: 10.7554/eLife.101630 (PMC12088675; doi:10.7554/eLife.101630)
Supplement: Figure 6—source data 1. [file elife-101630-fig6-data1.xlsx]

## Sheet: Parameters
microglia	PerimeterAreaRatio	ModifiedCircularity	RoundnessFactor	RamificationIndex	Solidity	Convexity	ConvexHullRadiiRatio	SpanRatio	ConvexHullCircularity	ProcessesSomaAreasRatio	ProcessesCellAreasRatio	Density	BranchingIndex	EndpointsBranchpointsRatio	SkeletonProcessesRatio	FractalDimension	LacunaritySlope	PolarizationIndex	Linearity	Inertia
E1 WT NT x40-1-1	2.57928	0.181956	0.144961	5.49583	0.271903	2.45729	3.15419	2.48714	0.857462	2.51955	0.715873	0.007	0.213333	3.33333	34.6452	1.0688	0.00112414	0.290047	4.17481	8.3242
E1 WT NT x40-1-2	3.04461	0.106487	0.0553866	9.39078	0.151929	3.45217	2.34688	1.93665	0.943128	6.11111	0.859375	0.0142222	1.175	4	74.36	1.17123	0.00209745	0.291815	1.02567	3.13714
E1 WT NT x40-1-3	2.86045	0.131637	0.0876249	7.59664	0.272319	4.12639	1.8342	1.47475	1.0409	6.07917	0.85874	0.0188778	0.975	1.36842	84.4421	1.21076	0.00335033	0.594758	4.06694	4.99877
E1 WT NT x40-1-4	3.31214	0.0782594	0.101309	12.778	0.22923	5.39954	2.59111	2.19137	0.882589	5.76427	0.852164	0.0302889	1.40167	0.733333	240.854	1.32246	0.0051473	0.387819	1.56455	4.12137
E1 WT NT x40-1-5	2.70999	0.156534	0.198025	6.3884	0.341287	3.51304	2.39132	1.96356	0.941307	3.05414	0.753339	0.0141444	0.4	1.4375	69.9489	1.15975	0.0025658	0.231121	1.00613	6.10872
E1 WT NT x40-1-6	2.75606	0.148449	0.0460908	6.73632	0.207452	2.39948	4.3459	3.16534	0.782053	4.67164	0.823684	0.0168889	0.808333	0.727273	74.7891	1.21344	0.00279357	0.48191	1.87946	14.2948
E1 WT NT x40-10-1	2.66471	0.164912	0.212077	6.06384	0.334584	3.52747	1.93393	1.44463	1.00569	3.01802	0.751121	0.00991111	0.173333	0.888889	37.2597	1.10616	0.0017017	0.450461	2.32035	2.33988
E1 WT NT x40-10-10	2.82985	0.136358	0.167837	7.33364	0.255916	3.66087	2.18815	1.55442	0.98677	3.03462	0.752145	0.0116556	0.311667	2.57143	45.2738	1.1348	0.00193145	0.174658	2.41733	3.43846
E1 WT NT x40-10-11	2.77617	0.145051	0.174081	6.89415	0.290558	3.37768	2.18781	1.493	0.908913	4.05854	0.802314	0.0115222	0.261667	1.5	39.8125	1.11212	0.00194248	0.486064	1.70325	2.44344
E1 WT NT x40-10-12	2.99837	0.11231	0.101689	8.90391	0.193183	3.71384	2.18747	1.50097	0.94898	4.83333	0.828571	0.0155556	0.625	1.875	82.8448	1.18308	0.00249076	0.481812	1.46512	2.60638
E1 WT NT x40-10-2	2.87243	0.129835	0.189128	7.70207	0.27299	3.9668	2.03496	1.63704	0.985733	2.16796	0.684339	0.0136222	0.303333	0.714286	72.1287	1.14884	0.0023211	0.0807792	1.40948	5.54666
E1 WT NT x40-10-3	2.6493	0.167864	0.299644	5.95721	0.361446	3.59585	2.31883	1.70554	1.00401	1.94278	0.660185	0.012	0.148333	2.5	29.4881	1.15696	0.00220321	0.109713	2.79151	3.88279
E1 WT NT x40-10-4	2.27253	0.259025	0.866241	3.86063	0.472485	2.75172	1.76605	1.13857	1.03694	1.02381	0.505882	0.00944444	0.025	0	7.29302	1.11239	0.00191638	0.0970143	1.31371	2.01344
E1 WT NT x40-10-5	2.91055	0.124259	0.11764	8.04768	0.236469	4.11152	2.51955	1.86673	1.05062	2.93455	0.745842	0.0167	1.09833	1.8	60.3033	1.21188	0.00282524	0.620132	4.59049	4.64834
E1 WT NT x40-10-6	2.96265	0.117025	0.218031	8.54517	0.247953	4.26639	2.25894	1.72816	1.00266	3.18794	0.761219	0.0131222	0.208333	1.45455	70.6385	1.16957	0.0021882	0.0650669	1.23988	2.51
E1 WT NT x40-10-7	2.63188	0.171263	0.130845	5.83896	0.274024	2.94	2.52089	1.84873	0.961873	3.36216	0.770756	0.00896667	0.223333	3.33333	26.3408	1.09558	0.00153486	0.205259	7.16481	7.84097
E1 WT NT x40-10-8	1.74909	0.473219	1.721	2.11319	0.835098	2.22785	1.77337	1.51048	1.15366	0.42268	0.297101	0.00613333	0	0	1.03049	1.05514	0.00128597	0	2.35141	2.38188
E1 WT NT x40-10-9	3.08595	0.101539	0.0974259	9.84845	0.221987	4.28779	2.64673	1.96716	0.924063	4.7767	0.826891	0.0198333	0.931667	1.52941	99.9024	1.23638	0.00318023	0.184861	3.18019	3.22435
E1 WT NT x40-11-1	2.50207	0.198871	0.256833	5.02838	0.379351	3.27536	1.83641	1.30186	1.05757	3.23026	0.763608	0.00714444	0.188333	1.66667	23.7556	1.03777	0.00124672	0.601967	2.80716	2.80897
E1 WT NT x40-11-2	2.82966	0.136388	0.0886315	7.33202	0.196776	3.1558	1.64242	1.19389	0.970286	6.53691	0.86732	0.0124778	0.25	1.42857	51.5154	1.13552	0.00203531	0.295409	1.63693	1.64667
E1 WT NT x40-11-3	3.05169	0.105623	0.045765	9.46761	0.176315	3.92683	1.92784	1.43578	0.987773	8.70833	0.896996	0.0207111	2.04	1.11111	109.048	1.2307	0.00332658	0.854488	2.74972	2.80543
E1 WT NT x40-11-4	3.24199	0.0848419	0.0362782	11.7866	0.168488	4.84615	2.19763	1.64357	1.00167	11.6623	0.921025	0.0212444	1.775	1.02703	174.285	1.25731	0.00313944	0.513927	1.37356	3.63203
E1 WT NT x40-11-5	2.70165	0.158044	0.31732	6.32736	0.328557	3.42259	2.08049	1.20114	0.943686	2.94659	0.746617	0.0147778	0.401667	3	38.2931	1.15525	0.00277339	0.279635	1.43524	1.44803
E1 WT NT x40-11-6	2.59134	0.179447	0.46431	5.57267	0.412716	3.54011	1.78053	1.31176	0.988844	2.31268	0.69813	0.0124778	0.186667	1.75	47.5115	1.12942	0.00233437	0.123037	1.51171	1.83221
E1 WT NT x40-11-7	3.23887	0.0851471	0.0632373	11.7444	0.162924	4.93897	1.66876	1.4354	1.04187	6.48974	0.866484	0.0283778	1.48667	1.58333	191.505	1.3023	0.0044104	0.11538	2.28155	3.21087
E1 WT NT x40-11-8	2.38917	0.226476	0.23146	4.41548	0.41632	2.99145	2.42313	2.04834	1.05	1.85714	0.65	0.00555556	0.115	2	9.99692	1.01065	0.000948504	0.340588	7.21085	7.29878
E1 WT NT x40-2-1	2.74736	0.149942	0.163209	6.66925	0.299819	3.98396	2.03346	1.59485	1.09096	3.8439	0.793555	0.0110333	0.151667	1.71429	50.2551	1.11621	0.00190018	0.241679	3.56405	4.27513
E1 WT NT x40-2-2	2.95578	0.117954	0.116463	8.47787	0.274562	4.20992	2.09195	1.53301	0.947692	4.85652	0.82925	0.0149667	0.778333	1.0625	84.9275	1.16882	0.00252968	0.463997	2.03597	3.61819
E1 WT NT x40-2-3	2.715	0.155634	0.172952	6.42535	0.314896	3.605	2.25317	1.54037	0.999827	4.62921	0.822355	0.0111333	0.255	1.6	35.9029	1.13017	0.00197333	0.130254	1.90673	1.92523
E1 WT NT x40-2-4	2.54415	0.189465	0.184006	5.27802	0.401839	3.24841	3.4343	2.46453	0.970898	1.79323	0.641992	0.00825556	0.258333	1.33333	23.5556	1.07139	0.00142466	0.7383	7.70205	12.4842
E1 WT NT x40-2-5	2.27595	0.258006	0.228324	3.87588	0.514665	2.60839	2.92275	2.0097	0.938081	3.09444	0.755767	0.00818889	0.138333	1.33333	10.6445	1.07644	0.00157048	0.449634	3.99388	6.64477
E1 WT NT x40-2-6	2.86232	0.131355	0.164434	7.61298	0.274367	4.27354	2.06612	1.405	1.07168	3.43772	0.774659	0.0138556	0.6	1.83333	50.56	1.1595	0.0023831	0.261082	1.44511	3.10241
E1 WT NT x40-2-7	2.7544	0.148733	0.053562	6.72346	0.186375	2.625	2.49956	1.43398	0.904362	6.13115	0.85977	0.0145	0.661667	0.9375	57.9545	1.16415	0.00247922	0.39148	5.69279	5.82074
E1 WT NT x40-2-8	2.49393	0.200742	0.254515	4.98153	0.422925	3.01099	3.30743	2.09795	0.929427	2.24242	0.691589	0.0107	0.158333	0.8	21.2628	1.10667	0.00205777	0.0966736	6.26049	6.90451
E1 WT NT x40-3-1	2.96129	0.117208	0.191885	8.53181	0.245368	4.52227	1.43027	1.18415	1.07006	2.83146	0.739003	0.0151556	0.443333	1.44444	77.7778	1.18667	0.00247508	0.488129	1.68024	2.54631
E1 WT NT x40-3-2	3.06299	0.104258	0.0678508	9.59162	0.167898	3.49535	2.81949	2.05642	0.889356	4.12861	0.805015	0.0217111	1.80667	1.52941	102.226	1.25237	0.00358862	0.31428	4.88861	6.10309
E1 WT NT x40-3-3	3.02915	0.108401	0.0428178	9.22504	0.14361	3.70783	1.95624	1.64955	1.06062	5.5907	0.848271	0.0157444	1.86	1.5	82.5499	1.19011	0.00239285	0.83205	3.07837	3.12185
E1 WT NT x40-3-4	3.24782	0.0842745	0.0488522	11.866	0.168167	4.62599	2.44836	1.76626	0.950674	5.03158	0.834206	0.0191	1.55	1.09091	138.093	1.22542	0.002754	0.563067	2.58002	5.19331
E1 WT NT x40-3-5	3.04356	0.106616	0.121004	9.37944	0.25955	4.98524	1.80672	1.61916	1.04327	4.06442	0.802544	0.0183444	0.828333	1.92308	80.7011	1.22246	0.00311598	0.550315	4.35326	5.18615
E1 WT NT x40-3-6	2.89207	0.126932	0.035008	7.87826	0.165254	3.00937	2.60379	1.87219	0.939659	8.28906	0.892347	0.0132111	0.868333	3.75	57.5014	1.15463	0.00200508	0.339445	1.64381	6.17465
E1 WT NT x40-3-7	2.24201	0.268287	0.585818	3.72735	0.428774	2.22603	2.87612	1.81436	0.912044	0.964286	0.490909	0.00672222	0	1	5.38721	1.02318	0.00121558	0.162623	1.25368	2.71557
E1 WT NT x40-3-8	2.04054	0.338324	0.554632	2.95575	0.586922	2.33721	2.9125	2.07286	1.03214	0.896907	0.472826	0.00408889	0.02	0	3.88506	0.937276	0.000730902	0.187952	4.11892	5.38785
E1 WT NT x40-4-1	2.39673	0.224512	0.748433	4.4541	0.504912	3.10989	2.20698	1.34939	0.982602	1.1633	0.537743	0.0142778	0.0983333	1.33333	13.6165	1.16176	0.00305014	0.0836893	1.68455	2.32763
E1 WT NT x40-4-10	2.8446	0.134062	0.19113	7.45926	0.227591	3.73841	1.51721	1.1141	1.05054	3.65051	0.78497	0.0202556	0.638333	0.95	97.225	1.24217	0.00362902	0.253338	1.72772	2.1149
E1 WT NT x40-4-11	2.91902	0.123053	0.0535235	8.12657	0.21676	3.71246	2.65271	2.12837	0.981217	6.4633	0.866011	0.0180778	1.81	1.53846	75.89	1.22677	0.00305375	0.490851	7.20471	7.55198
E1 WT NT x40-4-2	2.94321	0.119674	0.0498635	8.356	0.274995	4.01799	3.2348	2.74794	0.916954	6.56383	0.867792	0.0158	1.47167	1.13636	76.8752	1.19941	0.00259974	0.619082	10.8062	11.0689
E1 WT NT x40-4-3	2.98085	0.114598	0.146004	8.72612	0.207891	4.1324	1.74482	1.19919	1.03864	5.17647	0.838095	0.0163333	0.543333	0.928571	87.858	1.19823	0.00269599	0.334013	1.15531	1.30675
E1 WT NT x40-4-4	2.6357	0.170513	0.171745	5.86466	0.380057	3.48352	2.6363	1.92319	0.963497	3.69697	0.787097	0.0103333	0.451667	0.636364	34.9727	1.09628	0.00179616	0.264372	3.33488	3.58685
E1 WT NT x40-4-5	3.03461	0.107721	0.0816529	9.28323	0.156568	3.66962	2.15667	1.67101	0.999009	3.7953	0.791463	0.0158778	1.46833	0.708333	102.21	1.1837	0.00247531	0.748219	1.8615	2.15268
E1 WT NT x40-4-6	2.2972	0.25177	0.2217	3.97188	0.402607	2.04938	3.79975	2.64884	0.81318	1.35593	0.57554	0.00617778	0.22	1.33333	14.45	1.0297	0.00107444	0.590695	6.72941	14.2354
E1 WT NT x40-4-7	2.66666	0.164541	0.0799675	6.07751	0.285432	2.88182	3.50389	2.93265	0.887544	2.66949	0.727483	0.00962222	0.823333	5.5	22.4778	1.0978	0.00158149	0.96653	6.30806	14.0687
E1 WT NT x40-4-8	2.73382	0.152298	0.0654959	6.56608	0.175539	2.59559	2.46009	1.87095	0.943503	4.60976	0.821739	0.0102222	0.71	2.28571	49.7831	1.10873	0.00161693	0.634172	5.49509	6.46133
E1 WT NT x40-4-9	2.89628	0.126317	0.185	7.91656	0.275179	4.06552	1.9144	1.40637	0.978975	3.59635	0.782436	0.0196111	0.5	1.30769	72.7654	1.22654	0.00356864	0.285633	2.441	2.53912
E1 WT NT x40-6-1	3.07667	0.102629	0.0571209	9.74383	0.219088	4.63127	2.25456	1.72924	1.01546	8.43379	0.893998	0.0229556	1.47833	0.724138	117.572	1.27319	0.00378026	0.507924	1.96676	2.69006
E1 WT NT x40-6-2	2.48944	0.201783	0.470025	4.95583	0.385321	3.13235	1.87177	1.39791	1.01822	1.69725	0.629252	0.00653333	0.005	2	16.4432	1.01583	0.00113464	0.170034	2.4191	2.73956
E1 WT NT x40-6-3	2.37547	0.230074	0.465114	4.34642	0.411202	2.94904	2.09259	1.58219	1.05809	1.32134	0.569214	0.0100333	0.135	1	19.4553	1.12375	0.00196698	0.315702	2.59602	4.32745
E1 WT NT x40-6-4	2.59344	0.179013	0.308502	5.58619	0.421748	3.45116	2.42204	1.84237	0.951313	2.53652	0.717236	0.0156	0.371667	0.470588	52.5323	1.18122	0.00308253	0.362996	1.49402	3.25253
E1 WT NT x40-6-5	2.58021	0.18176	0.452478	5.50176	0.433548	3.40476	2.42192	1.65638	0.939867	1.5896	0.613839	0.0149333	0.163333	0.769231	38.4048	1.17798	0.00293661	0.0983495	1.5208	3.54416
E1 WT NT x40-6-6	2.88516	0.127946	0.157534	7.81582	0.247229	4.23506	1.66739	1.24016	1.08977	5.13333	0.836957	0.0163556	0.481667	1.09091	66.858	1.18115	0.00274735	0.261943	1.21272	1.33771
E1 WT NT x40-6-7	2.63575	0.170502	0.262247	5.86502	0.224786	2.86275	1.62767	1.05131	1.0295	1.89011	0.653992	0.00876667	0.193333	2	36.374	1.09451	0.00140228	0.495864	1.40345	1.54937
E1 WT NT x40-6-8	2.52521	0.193641	0.412897	5.16419	0.392917	3.14286	2.33988	1.85284	0.970895	1.46127	0.593705	0.00776667	0.0216667	1	32.4241	1.04621	0.00142647	0.342506	1.4901	4.3791
E1 WT NT x40-6-9	2.53567	0.191324	0.119607	5.22673	0.284238	2.60109	2.23943	1.86964	0.933437	3.58333	0.781818	0.00733333	0.171667	2	20.5601	1.03038	0.0012075	0.334845	1.80701	5.24928
E1 WT NT x40-7-1	3.04152	0.106868	0.0665834	9.35736	0.204035	3.62248	3.01003	2.35999	0.857038	5.64815	0.849582	0.0159556	0.873333	1.72222	92.5377	1.20185	0.0024903	0.259901	1.34326	5.08604
E1 WT NT x40-7-10	2.83462	0.135611	0.0689454	7.37404	0.184453	3.48372	1.71997	1.40141	1.10001	5.41406	0.844093	0.00912222	0.471667	2.16667	61.8312	1.09058	0.0012163	0.551821	2.7092	2.92475
E1 WT NT x40-7-11	2.91266	0.123959	0.0271101	8.06722	0.161389	2.92676	2.87352	2.20001	0.903081	8.29577	0.892424	0.0146667	0.956667	1.15385	74.3769	1.16574	0.00222125	0.43082	4.06113	8.37703
E1 WT NT x40-7-2	2.88161	0.12847	0.0304196	7.78392	0.192009	2.77813	3.61787	2.84454	0.814504	7.304	0.879576	0.0115333	0.833333	1.54545	66.8226	1.14506	0.00173043	0.305694	1.99327	16.7756
E1 WT NT x40-7-3	2.8887	0.127426	0.147864	7.84771	0.188255	3.35628	2.33782	1.68287	0.985691	2.87773	0.742117	0.00986667	0.296667	2.5	65.0212	1.11743	0.00151561	0.142374	1.86686	3.02282
E1 WT NT x40-7-4	2.93212	0.121212	0.0893585	8.25004	0.260005	3.55039	3.58227	2.84395	0.843973	3.64929	0.784913	0.0109	0.646667	1.8	65.1636	1.15725	0.00172164	0.194208	1.36741	9.66201
E1 WT NT x40-7-5	2.75941	0.147877	0.187418	6.7624	0.192736	2.99615	1.88124	1.09575	1.00921	3.03053	0.751894	0.0117333	0.491667	1.6	49.3753	1.13801	0.00191118	0.165717	1.36835	1.41612
E1 WT NT x40-7-6	2.72267	0.154266	0.103826	6.48229	0.258887	3.1581	2.88403	2.5764	0.957509	2.91262	0.744417	0.0134333	0.758333	1.71429	48.0711	1.15684	0.0022603	0.327913	7.23886	8.05552
E1 WT NT x40-7-7	2.74129	0.150994	0.105069	6.62276	0.279336	3.63285	1.76382	1.46121	1.03787	8	0.888889	0.0114	0.425	2.66667	32.0625	1.13876	0.00197165	0.139618	1.76925	2.28756
E1 WT NT x40-7-8	3.16773	0.0924147	0.0223192	10.8208	0.151716	4.02685	2.863	2.14506	0.955413	10.4688	0.912807	0.0244667	2.73667	1.42308	118.48	1.22424	0.0038894	0.70292	4.31585	10.3263
E1 WT NT x40-7-9	2.8675	0.130573	0.167597	7.65853	0.265295	3.93487	1.76444	1.33434	0.997516	4.5251	0.819008	0.0159	0.515	1.61538	54.6152	1.20511	0.00278608	0.319416	1.27308	2.03569
E1 WT NT x40-8-1	3.0004	0.112048	0.0848277	8.92478	0.178558	4.11799	1.99912	1.59022	1.09194	5.85563	0.854135	0.0216333	1.42667	1.4375	90.9928	1.24484	0.00355125	0.641006	1.29831	2.05971
E1 WT NT x40-8-10	2.26318	0.261826	0.164843	3.81933	0.442005	2.22703	4.2266	3.13593	0.877052	2.06623	0.673866	0.0102889	0.43	1	14.4631	1.10395	0.0019313	0.617422	9.03613	16.474
E1 WT NT x40-8-11	2.55449	0.187223	0.134925	5.34122	0.278746	2.64641	2.73444	2.0706	0.938453	3.26667	0.765625	0.00711111	0.111667	1.375	31.3796	1.07785	0.00112186	0.142522	1.53393	6.03874
E1 WT NT x40-8-2	2.75942	0.147875	0.0518744	6.76247	0.11968	2.10836	2.09349	1.53293	0.901216	3.01493	0.750929	0.00896667	0.818333	1.11111	57.0891	1.07573	0.001301	0.896088	21.2852	23.0944
E1 WT NT x40-8-3	2.52212	0.194333	0.754115	5.1458	0.417307	3.4881	1.34492	1.1766	1.04932	1.58	0.612403	0.0114667	0.123333	2.42857	40.5063	1.13711	0.00219009	0.220113	1.37784	1.40252
E1 WT NT x40-8-5	2.58537	0.180684	0.157575	5.53453	0.337891	3.10286	2.44595	2.11739	0.964479	2.52995	0.71671	0.00851111	0.155	0.875	30.3115	1.11137	0.00140443	0.210681	7.3908	7.72611
E1 WT NT x40-8-6	2.43006	0.216061	0.185361	4.62831	0.43068	2.97203	2.02013	1.66722	0.978482	3.79286	0.791356	0.00745556	0.203333	0.857143	26.2222	1.074	0.0013095	0.588007	2.84991	4.68009
E1 WT NT x40-8-7	2.75842	0.148045	0.239265	6.75472	0.254884	3.71698	1.73465	1.36628	1.08996	2.34259	0.700831	0.0120333	0.401667	1.375	38.9776	1.14463	0.00207911	0.354369	1.15567	2.13107
E1 WT NT x40-8-8	2.49619	0.200222	0.584286	4.99446	0.238685	2.45116	1.71839	1.17014	1.00455	1.2602	0.557562	0.00984444	0.141667	3.5	20.6498	1.08553	0.00188971	0.167978	1.60856	1.70688
E1 WT NT x40-8-9	2.74234	0.150811	0.22697	6.63082	0.269731	3.27917	2.00059	1.25442	0.952207	3.87391	0.794826	0.0124556	0.306667	1.45455	41.8058	1.14699	0.00223552	0.181676	1.06855	1.42317
E1 WT NT x40-9-1	2.91712	0.123323	0.0996316	8.10881	0.163268	3.01294	2.96383	1.62595	0.919566	2.56803	0.719733	0.0116556	0.7	7	44.8424	1.12844	0.00187566	0.373069	2.57865	2.90716
E1 WT NT x40-9-10	2.573	0.183275	0.129171	5.45627	0.349006	3.14545	2.91497	1.87668	0.975822	4.14286	0.805556	0.008	0.325	1.6	33.3121	1.06414	0.00133299	0.589256	4.66194	4.92562
E1 WT NT x40-9-11	2.96277	0.117009	0.1794	8.54637	0.228809	4.11355	1.73363	1.44272	1.00623	4.08889	0.803493	0.0152667	0.276667	1.26667	76.1775	1.17653	0.00261807	0.196401	2.44776	2.6558
E1 WT NT x40-9-2	2.71626	0.155408	0.0311733	6.43469	0.18338	2.68203	2.37607	1.73455	0.973328	8.57353	0.895545	0.00723333	0.755	1.8	42.8199	1.05302	0.00103591	1.10647	4.70494	5.94567
E1 WT NT x40-9-3	2.38893	0.226537	0.738969	4.41429	0.373753	2.73714	1.68673	1.33762	1.01425	1.11036	0.526147	0.0104111	0.0733333	1.6	24.5436	1.11052	0.00202817	0.0326686	2.21499	2.30035
E1 WT NT x40-9-4	2.54209	0.189914	0.143645	5.26553	0.367521	3.17098	2.3138	2.01525	0.993369	4	0.8	0.0119444	0.455	0.625	30.8942	1.11825	0.00219314	0.496499	5.3854	5.41876
E1 WT NT x40-9-5	2.29786	0.251578	0.109751	3.97491	0.413893	1.73711	6.75828	5.36583	0.679293	1.53097	0.604895	0.00635556	0.433333	0	12.974	1.03372	0.00103978	0.301511	10.5864	40.7557
E1 WT NT x40-9-6	2.54775	0.188682	0.0931125	5.29992	0.331037	2.67179	3.66385	2.23215	0.876183	3.41954	0.773732	0.00854444	0.363333	2.4	28.4034	1.08252	0.00138571	0.984272	5.16783	10.2474
E1 WT NT x40-9-7	2.04795	0.33545	0.708772	2.98107	0.651515	2.45	2.34223	1.67563	1.0182	0.915842	0.478036	0.0086	0.0266667	2	3.9027	1.07617	0.00178965	0.18328	2.12344	4.5493
E1 WT NT x40-9-8	2.59037	0.179647	0.280377	5.56647	0.379939	3.40984	2.36095	1.86228	0.993795	2.33333	0.7	0.0111111	0.14	1.25	27.6014	1.14492	0.00204312	0.141421	2.83466	3.98802
E1 WT NT x40-9-9	2.52187	0.194389	0.177433	5.14432	0.341537	2.78846	2.48435	2.00859	0.927508	3.21481	0.762742	0.00632222	0.09	1.5	25.4032	1.01717	0.00105425	0.335377	2.75048	4.97974
E16 WT T0 controle du 130223 C1 - x40-10	3.07145	0.103248	0.0555033	9.68545	0.249197	4.49814	2.99363	1.92925	0.93034	7.74648	0.885668	0.0138	0.643333	0.884615	100.808	1.17751	0.00208055	0.292141	4.1144	6.07007
E16 WT T0 controle du 130223 C1 - x40-11	1.98936	0.358858	0.685802	2.78662	0.694737	2.24194	4.23752	2.98124	0.965241	0.455882	0.313131	0.0022	0.015	0	3.62903	0.86493	0.000352841	0.256235	9.18656	9.45132
E16 WT T0 controle du 130223 C1 - x40-2	2.97763	0.115025	0.0370716	8.69379	0.19041	3.28022	3.79665	2.81375	0.864668	6.9418	0.874084	0.0166778	1.14667	1.125	108.905	1.20777	0.00258657	0.347255	11.8559	12.7549
E16 WT T0 controle du 130223 C1 - x40-3	2.72645	0.153596	0.0984969	6.51057	0.302265	3.34066	2.98663	2.38777	0.933296	2.81319	0.737752	0.00771111	0.686667	2	36.6582	1.04548	0.00120526	0.832516	6.92094	9.18446
E16 WT T0 controle du 130223 C1 - x40-4	2.75558	0.14853	0.259581	6.73266	0.292165	3.57576	1.99691	1.69041	0.982578	2.72881	0.731818	0.00977778	0.225	1.875	42.7888	1.0894	0.00168302	0.226134	1.57269	2.59965
E16 WT T0 controle du 130223 C1 - x40-5	2.74172	0.15092	0.0755781	6.62603	0.20764	2.80328	3.20301	2.5101	0.928449	4.17073	0.806604	0.00942222	0.281667	0.666667	48.4269	1.09358	0.00143298	0.123815	4.90348	5.26947
E16 WT T0 controle du 130223 C1 - x40-6	2.82268	0.137487	0.0842377	7.2734	0.2232	3.24893	2.31923	1.51978	0.945486	6.36752	0.864269	0.00957778	0.526667	1.5	49.4819	1.09941	0.00140679	0.538538	1.71958	2.13558
E16 WT T0 controle du 130223 C1 - x40-7	3.04901	0.105949	0.0745274	9.43847	0.211228	4.22801	2.23761	1.56279	0.974673	7.0914	0.876412	0.0167222	0.805	0.785714	120.698	1.204	0.0025605	0.0729083	2.17284	2.53387
E16 WT T0 controle du 130223 C1 - x40-8	2.57009	0.183891	0.161456	5.43799	0.356366	3.05926	2.62381	1.87635	0.942387	2.47727	0.712418	0.0051	0.235	1.16667	22.6177	1.01268	0.000765647	0.776844	3.69381	6.13706
E16 WT T0 controle du 130223 C1 - x40-9	2.79603	0.141773	0.196613	7.05355	0.279377	3.87283	2.16397	1.51256	1.03878	2.9235	0.745125	0.00797778	0.275	1	57.243	1.06569	0.00122078	0.412209	1.46408	2.62176
E16 WT T0 controle du 130223 C10 - x40-10	3.06306	0.10425	0.046243	9.59231	0.199765	3.75449	2.7919	2.5161	0.875726	5.97436	0.856618	0.0151111	1.21333	1.41667	86.8017	1.20312	0.00226148	0.553066	1.91796	6.69395
E16 WT T0 controle du 130223 C10 - x40-2	2.90169	0.125533	0.193284	7.96601	0.241025	3.71825	2.41167	1.41073	0.950752	3.70513	0.787466	0.0122333	0.611667	2.5	54.8143	1.14075	0.0019526	0.242976	1.41537	1.70947
E16 WT T0 controle du 130223 C10 - x40-3	2.76595	0.146767	0.0586452	6.81351	0.178862	2.47768	3.48178	2.76261	0.859835	2.96992	0.748106	0.00586667	0.33	8.5	15.0101	1.01724	0.00080422	0.350865	7.46212	16.6848
E16 WT T0 controle du 130223 C10 - x40-4	2.86127	0.131514	0.0529376	7.60375	0.169748	3.25352	2.1845	1.57927	1.03854	3.78986	0.791225	0.00734444	1.04667	4	47.7323	1.07083	0.000989045	1.37846	4.60128	5.37405
E16 WT T0 controle du 130223 C10 - x40-5	2.98073	0.114615	0.032341	8.72486	0.163867	3.46488	2.30295	1.66581	0.981034	8.50847	0.894831	0.0124667	1.22833	0.923077	76.9761	1.14354	0.00190792	0.764637	7.88271	8.05678
E16 WT T0 controle du 130223 C10 - x40-6	2.61127	0.175376	0.370581	5.70204	0.295652	2.92053	1.93872	1.05918	0.941978	1.65922	0.62395	0.00528889	0.103333	2	30.3872	1.01678	0.000803978	0.369533	1.06718	1.54621
E16 WT T0 controle du 130223 C10 - x40-7	2.56987	0.183938	0.402953	5.43662	0.416051	3.29878	1.97206	1.6098	0.9407	2.33898	0.700508	0.00875556	0.115	0.692308	44.654	1.11453	0.00158671	0.287206	1.51821	2.67514
E16 WT T0 controle du 130223 C10 - x40-8	2.21929	0.275397	0.304183	3.63112	0.507341	2.29293	3.57816	2.56175	0.886543	1.61345	0.617363	0.00345556	0.0583333	4	11.0208	0.915643	0.000556929	0.484486	2.27701	9.0245
E16 WT T0 controle du 130223 C10 - x40-9	2.17286	0.290518	1.90259	3.44212	0.632085	2.98095	1.26707	1.1377	1.08928	0.551887	0.355623	0.00731111	0.00666667	1	12.4615	1.05602	0.00147963	0.110264	1.00297	1.11532
E16 WT T0 controle du 130223 C2 - x40-10	2.75433	0.148745	0.183498	6.72292	0.342009	3.72195	2.32719	1.9865	0.946661	3.06746	0.754146	0.0113889	0.243333	1.5	51.2303	1.1612	0.00197493	0.227392	1.65879	5.80569
E16 WT T0 controle du 130223 C2 - x40-11	2.9378	0.120421	0.131959	8.30417	0.371738	5	2.14179	1.64503	0.987541	6.94928	0.874202	0.0121889	0.475	1.05882	66.7456	1.15453	0.00200621	0.486837	1.00402	2.75189
E16 WT T0 controle du 130223 C2 - x40-12	2.42092	0.218347	0.359976	4.57987	0.320084	2.34711	2.61555	1.97118	0.905834	1.125	0.529412	0.0034	0.0233333	2.5	13.6358	0.934334	0.000492933	0.347728	2.78853	3.40488
E16 WT T0 controle du 130223 C2 - x40-13	1.87331	0.410155	1.52184	2.4381	0.793522	2.42	1.84194	1.28823	1.11425	0.661017	0.397959	0.00217778	0	2	1.28205	0.864673	0.000371365	0	1.1807	1.8314
E16 WT T0 controle du 130223 C2 - x40-2	3.02316	0.10915	0.0734986	9.16173	0.215368	4.31518	1.67198	1.32138	1.01492	7.57353	0.883362	0.0129556	0.661667	1.04762	104.45	1.18523	0.00184154	0.393994	1.39405	2.33038
E16 WT T0 controle du 130223 C2 - x40-3	2.97107	0.115897	0.383807	8.62836	0.395098	5.72083	1.92216	1.34646	1.05482	3.92665	0.797022	0.0223889	0.171667	0.705882	134.636	1.26391	0.00440204	0.157524	1.29461	1.30667
E16 WT T0 controle du 130223 C2 - x40-4	2.39296	0.225488	0.589948	4.43482	0.460094	3.13514	2.32057	1.82844	1.04221	0.921569	0.479592	0.00544444	0.00666667	0.75	23.3021	1.01307	0.000949217	0.142857	3.31013	4.37719
E16 WT T0 controle du 130223 C2 - x40-5	2.84964	0.133285	0.0619153	7.5027	0.291667	3.75829	2.70696	2.21666	0.927534	5.78626	0.852643	0.00987778	0.94	1.5	56.529	1.11685	0.0015685	0.859016	13.3794	13.4299
E16 WT T0 controle du 130223 C2 - x40-6	3.14107	0.0952947	0.0320572	10.4938	0.215378	5.15273	1.90307	1.53525	1.05805	12.4352	0.925569	0.0161222	1.10667	1.22222	120.331	1.19447	0.00247169	0.371263	4.09395	4.09979
E16 WT T0 controle du 130223 C2 - x40-7	2.92072	0.122813	0.101542	8.14248	0.240658	4.17672	1.53617	1.25601	1.04563	6.82639	0.872227	0.0125222	0.281667	1.76923	68.7691	1.15076	0.00200824	0.210631	2.51228	2.54412
E16 WT T0 controle du 130223 C2 - x40-8	2.48574	0.202645	0.349962	4.93473	0.545339	3.85714	2.02725	1.69945	1.05845	3.19512	0.761628	0.00955556	0.198333	0.818182	40.5634	1.12086	0.00181461	0.314384	2.29477	2.9935
E16 WT T0 controle du 130223 C2 - x40-9	2.70967	0.156593	0.312651	6.386	0.400646	4.34756	1.87735	1.58221	1.07556	3.50909	0.778226	0.0110222	0.215	0.692308	48.7513	1.12948	0.00202543	0.319084	2.4014	2.41049
E16 WT T0 controle du 130223 C3 - x40-2	3.07134	0.103261	0.102891	9.68421	0.198946	4.75312	1.67834	1.31265	1.10039	6.52107	0.86704	0.0218111	1.37667	1.58824	99.7321	1.25458	0.00363933	0.507207	1.2999	1.37257
E16 WT T0 controle du 130223 C3 - x40-3	2.91215	0.124031	0.0742526	8.06251	0.226826	4.25792	1.77609	1.57162	1.10887	6.6338	0.869004	0.0120444	0.511667	1.08333	79.1178	1.14262	0.00187436	0.455593	2.09276	2.64653
E16 WT T0 controle du 130223 C3 - x40-4	2.10649	0.31359	2.12583	3.18888	0.75667	2.92233	1.57076	1.10643	1.05351	0.528017	0.345557	0.00787778	0	2	6.53061	1.10664	0.00167074	0.0839773	1.01938	1.10346
E16 WT T0 controle du 130223 C3 - x40-5	2.54363	0.18958	0.469365	5.27483	0.425245	3.46626	1.81301	1.26259	1.0077	2.6087	0.722892	0.0101444	0.116667	0.5	42.2561	1.14014	0.00188222	0.284695	1.64153	1.74817
E16 WT T0 controle du 130223 C3 - x40-6	2.4841	0.203027	0.189977	4.92544	0.376607	2.90604	2.3445	1.67369	0.961417	3.52206	0.778862	0.00683333	0.126667	0.818182	30.5658	1.03624	0.00114474	0.0570266	2.71238	3.48428
E16 WT T0 controle du 130223 C3 - x40-7	2.72881	0.153179	0.0558821	6.52831	0.209234	2.74648	2.72904	2.23857	0.919729	4.65487	0.823161	0.0071	0.401667	1.8	41.6426	1.04364	0.00102594	0.474713	1.21785	7.85559
E16 WT T0 controle du 130223 C3 - x40-8	2.67102	0.163718	0.158042	6.10808	0.370831	3.43605	2.36029	1.74416	0.923776	4.03378	0.801342	0.00827778	0.213333	1.33333	31.4389	1.10135	0.00139817	0.234592	2.51334	4.16055
E16 WT T0 controle du 130223 C4 - x40-10	2.26597	0.260988	0.0868341	3.83159	0.422507	1.89865	6.00644	4.09693	0.762339	2.45161	0.71028	0.00475556	0.141667	0	10.3158	0.992608	0.000742818	0.41299	16.5163	26.751
E16 WT T0 controle du 130223 C4 - x40-11	2.67872	0.162272	0.0283047	6.16249	0.219552	2.63855	2.69376	2.09282	0.913779	9.86486	0.90796	0.00446667	0.383333	1.5	46.3014	1.0079	0.000557892	0.749793	2.38675	8.52483
E16 WT T0 controle du 130223 C4 - x40-12	2.84751	0.133614	0.103704	7.48424	0.250787	3.58373	2.08578	1.40258	0.956171	5.64167	0.849435	0.00885556	0.345	0.933333	60.87	1.09516	0.00134623	0.602171	1.48782	2.71106
E16 WT T0 controle du 130223 C4 - x40-2	3.30295	0.0790918	0.114439	12.6435	0.178757	5.27169	1.79259	1.45457	0.986166	5.04556	0.834589	0.0294889	1.82833	1.35897	206.31	1.31597	0.00482813	0.419926	2.06049	2.63054
E16 WT T0 controle du 130223 C4 - x40-3	2.96364	0.116891	0.0526587	8.55495	0.185731	3.56604	2.39371	1.91692	0.967224	4.99383	0.833162	0.0107889	0.856667	1.73333	73.5921	1.13913	0.00157804	0.163635	4.72098	9.024
E16 WT T0 controle du 130223 C4 - x40-4	2.90747	0.124701	0.0828379	8.01917	0.204326	3.67544	2.474	1.65839	1.01395	3.77473	0.790564	0.00965556	0.731667	3.2	66.0393	1.1104	0.00133336	0.884595	3.63823	4.73066
E16 WT T0 controle du 130223 C4 - x40-5	2.8377	0.135131	0.0973437	7.4002	0.265287	3.68639	2.47093	1.9985	0.967163	3.40625	0.77305	0.00626667	0.298333	3.8	44.3142	1.06861	0.000848172	0.397242	4.23084	5.20579
E16 WT T0 controle du 130223 C4 - x40-6	2.67708	0.16258	0.278206	6.15083	0.2924	3.53416	2.04024	1.44758	1.06259	1.76829	0.638767	0.00756667	0.39	1.4	29.354	1.05893	0.00121417	0.407348	1.60381	1.94411
E16 WT T0 controle du 130223 C4 - x40-7	3.05709	0.104969	0.0605839	9.52664	0.180109	4.05575	2.02655	1.36113	1.00314	6.2439	0.861953	0.0132	1.05333	1.6	97.5156	1.18151	0.00186812	0.494073	1.98465	2.97531
E16 WT T0 controle du 130223 C4 - x40-8	2.78919	0.142893	0.0968219	6.99822	0.222857	3.03265	2.41501	2.17097	0.917956	3.77128	0.790412	0.00996667	0.198333	2.28571	51.9944	1.11913	0.00154474	0.236096	2.35663	7.78813
E16 WT T0 controle du 130223 C4 - x40-9	3.10507	0.0993274	0.0823388	10.0677	0.189545	4.52768	1.79226	1.506	1.03297	5	0.833333	0.0131333	0.54	2.21429	88.9503	1.15555	0.00190076	0.339204	2.51173	2.79753
E16 WT T0 controle du 130223 C5 - x40-10	2.80777	0.139869	0.13918	7.14954	0.306615	3.9466	1.76916	1.21024	0.996893	6.29787	0.862974	0.0114333	0.541667	1.375	68.1486	1.14896	0.00188301	0.532701	1.1151	2.5226
E16 WT T0 controle du 130223 C5 - x40-11	2.58154	0.181482	0.221265	5.51019	0.40991	3.34054	2.52004	1.9533	0.946904	3.55	0.78022	0.0111222	0.331667	0.470588	48.6876	1.13053	0.0020029	0.429901	3.54518	3.95522
E16 WT T0 controle du 130223 C5 - x40-12	2.61097	0.175436	0.385705	5.70009	0.474114	4.35036	1.45375	1.22037	1.10842	2.55102	0.718391	0.00966667	0.148333	0.7	31.36	1.12592	0.00176162	0.366719	1.95433	2.05663
E16 WT T0 controle du 130223 C5 - x40-13	2.66628	0.164613	0.14746	6.07487	0.338467	3.37755	2.63573	1.76068	0.955667	4.59172	0.821164	0.0105	0.303333	0.642857	40.8299	1.11871	0.00180525	0.416587	1.64092	3.19506
E16 WT T0 controle du 130223 C5 - x40-14	3.13485	0.0959793	0.0747104	10.4189	0.281744	5.97788	2.09112	1.55042	1.08093	8.04054	0.889387	0.0148667	1.055	0.958333	108.908	1.20201	0.00228838	0.513641	3.10304	3.70208
E16 WT T0 controle du 130223 C5 - x40-15	1.88248	0.405852	1.00642	2.46396	0.768839	2.05128	3.09149	1.98151	0.949456	0.719818	0.418543	0.00838889	0.0166667	0	10.6456	1.0756	0.00176404	0.150055	2.98534	3.6263
E16 WT T0 controle du 130223 C5 - x40-2	2.93792	0.120405	0.054567	8.30528	0.134152	2.9734	1.62829	1.10757	0.977465	6.4715	0.866158	0.0160222	1.03	2.91667	89.8519	1.20762	0.00231551	0.411351	1.80942	2.02136
E16 WT T0 controle du 130223 C5 - x40-3	2.7139	0.155831	0.434952	6.41719	0.340402	3.55777	2.16985	1.28269	0.950247	2.0275	0.669695	0.0171222	0.416667	1.0625	68.0475	1.19876	0.00330927	0.0569618	1.20292	1.7284
E16 WT T0 controle du 130223 C5 - x40-4	2.57393	0.18308	0.136231	5.4621	0.303985	2.78173	3.46719	2.71075	0.923696	2	0.666667	0.0089	0.293333	1.42857	36.1816	1.09084	0.00149212	0.301888	9.97103	10.8214
E16 WT T0 controle du 130223 C5 - x40-5	2.87599	0.129303	0.0289935	7.73375	0.211514	3.1978	3.51033	2.09968	0.899065	8.94118	0.899408	0.0112667	0.605	1	48.8169	1.10223	0.00174415	0.228622	6.11669	7.19338
E16 WT T0 controle du 130223 C5 - x40-6	2.57968	0.181871	0.167806	5.49839	0.46402	3.46512	3.05126	2.18799	0.925154	3.49519	0.77754	0.0103889	0.14	0.8	29.3205	1.13102	0.00179381	0.310253	1.19626	5.22023
E16 WT T0 controle du 130223 C5 - x40-7	2.63832	0.169998	0.404332	5.88241	0.428127	3.86316	2.10307	1.71227	1.00369	1.99275	0.66586	0.0137667	0.193333	2	34.2109	1.16068	0.00269874	0.102432	2.42961	3.67761
E16 WT T0 controle du 130223 C5 - x40-8	2.63463	0.170722	0.261801	5.85748	0.372227	3.51124	2.5258	2.00557	0.982529	1.9901	0.665563	0.0100667	0.253333	1.6	29.335	1.09335	0.00179654	0.378798	5.93707	6.27226
E16 WT T0 controle du 130223 C5 - x40-9	2.40556	0.22224	0.632434	4.49963	0.482972	3.01235	2.28012	1.45121	0.963312	1.12727	0.529915	0.0104	0.153333	1.14286	21.8065	1.13613	0.00201258	0.261488	1.09714	2.77033
E16 WT T0 controle du 130223 C6 - x40-10	2.6192	0.173782	0.286148	5.75434	0.369832	3.48352	2.17956	1.63618	0.995452	2.11613	0.679089	0.0107333	0.376667	1.125	34.7576	1.11733	0.00196674	0.523762	1.17643	3.51821
E16 WT T0 controle du 130223 C6 - x40-11	2.47883	0.204263	0.302363	4.89566	0.410405	3.01242	2.74957	2.07221	0.960502	1.10512	0.524968	0.00867778	0.398333	2.2	22.478	1.05606	0.00154467	0.536742	4.81546	6.43524
E16 WT T0 controle du 130223 C6 - x40-12	2.57317	0.18324	0.143912	5.45732	0.260664	2.73077	2.05957	1.61548	0.980089	2.58696	0.721212	0.00733333	0.291667	1.5	33.3529	1.05644	0.00118852	0.58517	1.6232	5.74388
E16 WT T0 controle du 130223 C6 - x40-13	3.08537	0.101606	0.140964	9.84196	0.218575	4.68727	1.90442	1.21588	1.01868	5.69118	0.850549	0.0151667	0.433333	2.13333	83.3084	1.20266	0.00236913	0.245098	1.06018	1.0701
E16 WT T0 controle du 130223 C6 - x40-2	3.22693	0.0863259	0.100076	11.584	0.200913	5.52055	1.71507	1.42044	1.06321	6.37321	0.864374	0.0171222	0.828333	4.22222	83.25	1.20546	0.00257235	0.382111	1.90894	1.96207
E16 WT T0 controle du 130223 C6 - x40-3	2.8574	0.1321	0.0821348	7.57003	0.186942	3.26923	2.10843	1.581	0.998838	5.93714	0.855848	0.0134889	0.741667	1.30769	63.5698	1.1684	0.00212082	0.655103	2.23316	2.3114
E16 WT T0 controle du 130223 C6 - x40-4	2.52865	0.192878	1.16614	5.18464	0.51344	3.62941	1.52526	1.14763	0.976952	1.15488	0.535936	0.0125222	0.0266667	0.928571	45.6225	1.17468	0.00258795	0.0893633	1.29417	1.29947
E16 WT T0 controle du 130223 C6 - x40-5	2.92599	0.122071	0.117074	8.19196	0.224153	3.99569	1.90874	1.41748	1.03022	3.65297	0.785083	0.0113222	0.331667	2.28571	58.8612	1.12644	0.00177165	0.308531	3.13539	3.25728
E16 WT T0 controle du 130223 C6 - x40-6	2.97278	0.115669	0.0352947	8.64538	0.152286	3.36129	1.9742	1.6385	0.996306	7.19858	0.878028	0.0128444	0.748333	1.88889	69.7103	1.1418	0.00188923	0.502588	1.5382	4.37362
E16 WT T0 controle du 130223 C6 - x40-7	2.87635	0.12925	0.0899408	7.73697	0.210558	3.61789	1.9614	1.43991	1.01906	5.26786	0.840456	0.0117	0.386667	1.09091	59.774	1.12385	0.00179695	0.290724	2.07296	2.99699
E16 WT T0 controle du 130223 C6 - x40-8	3.2657	0.0825573	0.0365458	12.1128	0.142192	4.6841	1.63828	1.41224	1.02552	10.5212	0.913203	0.0302111	2.455	1.72222	193.415	1.31988	0.00465905	0.672313	1.67499	3.12296
E16 WT T0 controle du 130223 C6 - x40-9	2.36915	0.231755	0.386509	4.31489	0.431223	2.66667	2.96272	1.90453	0.941126	1.40854	0.58481	0.00438889	0.0683333	1.5	23.7056	1.02774	0.000697279	0.405656	2.74247	4.17259
E16 WT T0 controle du 130223 C7 - x40-10	2.82621	0.13693	0.192724	7.30302	0.262685	3.73498	2.20688	1.85039	0.997858	2.08133	0.675465	0.0185222	0.988333	3.44444	55.5062	1.22346	0.00333211	0.489849	5.21064	5.22264
E16 WT T0 controle du 130223 C7 - x40-11	2.92946	0.121583	0.0377312	8.22481	0.285919	3.34437	4.64102	3.70954	0.760444	8.16031	0.890833	0.0133333	0.795	1.92308	56.6099	1.15286	0.00210722	0.635085	2.25483	18.4772
E16 WT T0 controle du 130223 C7 - x40-12	2.88159	0.128473	0.185817	7.78374	0.312629	4.34842	2.49733	1.97161	0.999145	4.20601	0.807914	0.0134778	0.36	1.28571	52.5806	1.1634	0.00235769	0.162422	2.93944	2.93985
E16 WT T0 controle du 130223 C7 - x40-13	2.54571	0.189126	0.0516005	5.28749	0.258669	2.46259	2.95055	2.60114	0.915736	3.54878	0.780161	0.00414444	0.268333	4.5	21.4467	0.982441	0.000533437	1.47363	8.36922	17.8867
E16 WT T0 controle du 130223 C7 - x40-2	3.03486	0.10769	0.0848004	9.28592	0.239711	4.88983	1.69912	1.32766	1.07554	6.92903	0.873881	0.0136556	0.448333	1.35714	76.1601	1.16418	0.00213609	0.222787	2.0586	3.57957
E16 WT T0 controle du 130223 C7 - x40-4	3.11873	0.097778	0.228195	10.2272	0.26704	5.46853	1.72767	1.40464	1.03472	2.81352	0.737775	0.0206778	0.48	1.09091	101.876	1.23724	0.00357957	0.353078	1.07829	2.46126
E16 WT T0 controle du 130223 C7 - x40-5	2.44006	0.213587	0.322038	4.68193	0.500451	3.17886	2.69636	1.9064	0.959767	2.26471	0.693694	0.00616667	0.05	1.2	17.4649	1.0305	0.0010926	0.0949158	1.79253	4.61386
E16 WT T0 controle du 130223 C7 - x40-6	2.42162	0.218171	0.121376	4.58356	0.40274	3.05426	2.75084	2.33589	1.05001	2.92	0.744898	0.00653333	0.36	1.25	15.3516	1.04657	0.0011291	0.85017	14.1503	15.5515
E16 WT T0 controle du 130223 C7 - x40-7	2.73052	0.152878	0.0651064	6.54118	0.232163	3.03196	3.43796	2.51967	0.961991	4.06173	0.802439	0.00911111	0.503333	2	41.8784	1.07971	0.00137661	0.364591	5.37123	7.30791
E16 WT T0 controle du 130223 C7 - x40-8	2.46766	0.206906	0.076016	4.83311	0.343711	2.51531	3.41952	2.58272	0.887702	5.27273	0.84058	0.0092	0.471667	1.14286	30.6264	1.08437	0.00157699	0.987849	7.32537	10.7409
E16 WT T0 controle du 130223 C7 - x40-9	3.11922	0.0977226	0.019806	10.2331	0.14348	3.70175	3.04012	2.39304	0.955008	8.98361	0.899836	0.0135333	1.31833	2.9	75.1542	1.16913	0.0018734	0.183471	8.63795	10.5663
E16 WT T0 controle du 130223 C8 - x40-10	3.02277	0.1092	0.053901	9.15752	0.157775	3.50132	2.84972	2.11308	0.962574	4.90459	0.83064	0.0185667	1.495	2.47059	117.591	1.22223	0.00268009	0.469921	3.43695	5.44792
E16 WT T0 controle du 130223 C8 - x40-11	2.37447	0.23034	0.21515	4.34141	0.400851	2.35211	3.3321	2.37343	0.855728	1.83735	0.647558	0.00523333	0.176667	2.5	28.3574	1.00557	0.000841758	0.379965	3.09486	10.4734
E16 WT T0 controle du 130223 C8 - x40-12	2.53671	0.191096	0.0896744	5.23297	0.297643	2.46835	4.86358	4.16513	0.864592	2.87719	0.742081	0.00491111	0.271667	3.33333	24.6951	0.983398	0.000706169	0.201802	19.1631	19.1924
E16 WT T0 controle du 130223 C8 - x40-13	2.53758	0.190903	0.169476	5.23826	0.349143	3.03974	2.89004	2.20532	0.98208	2.55233	0.718494	0.00678889	0.228333	1	35.0251	1.04091	0.00109896	0.742667	7.50296	7.57338
E16 WT T0 controle du 130223 C8 - x40-14	2.64039	0.169594	0.0583741	5.89643	0.169539	2.12448	2.46034	1.7233	0.875041	4.45455	0.816667	0.00666667	0.528333	4.25	35.0224	1.04839	0.000957718	0.248328	1.07787	4.28427
E16 WT T0 controle du 130223 C8 - x40-15	2.81209	0.139174	0.0632446	7.18523	0.212169	3.19592	2.74258	1.86936	0.965637	5.38514	0.843386	0.0105	0.825	1.45455	65.798	1.11316	0.00154832	0.848279	1.26608	5.98001
E16 WT T0 controle du 130223 C8 - x40-3	2.88966	0.127285	0.204949	7.85642	0.168135	3.3945	1.7092	1.34698	1.05371	1.20625	0.546742	0.00784444	0.01	2.25	52.2383	1.07002	0.000999777	0.438902	1.70992	1.9489
E16 WT T0 controle du 130223 C8 - x40-4	2.64449	0.168795	0.132419	5.92435	0.306769	2.63223	4.44223	2.85088	0.802191	1.69795	0.629348	0.0102222	0.44	1.85714	38.3437	1.11061	0.00175833	0.72831	2.64778	17.3588
E16 WT T0 controle du 130223 C8 - x40-5	2.59907	0.177856	0.154271	5.62251	0.379297	3.10101	3.62605	2.38153	0.895537	3.16228	0.759747	0.0105444	0.481667	0.8	38.2191	1.11707	0.00189824	0.639415	6.52014	7.57258
E16 WT T0 controle du 130223 C8 - x40-6	3.12266	0.0973364	0.0260228	10.2736	0.210215	4.75556	2.00349	1.60826	1.00959	15.5733	0.939662	0.0138111	1.68667	1.47368	89.3228	1.17983	0.00208691	1.19263	1.89929	4.75222
E16 WT T0 controle du 130223 C8 - x40-7	2.48325	0.203227	0.427135	4.92061	0.46773	3.51587	1.89225	1.28622	1.04476	2.4492	0.710078	0.00716667	0.0933333	0.833333	14.3253	1.11719	0.0013056	0.0880451	1.92309	2.07241
E16 WT T0 controle du 130223 C8 - x40-8	2.90809	0.124612	0.0978513	8.02488	0.199688	3.44939	1.68559	1.24369	0.961895	5.06081	0.835006	0.00996667	0.69	2.30769	62.2911	1.12433	0.00138573	0.907052	1.07775	2.28123
E16 WT T0 controle du 130223 C8 - x40-9	1.95184	0.374703	1.46484	2.66878	0.725451	2.36842	2.02278	1.37976	1.04194	0.560345	0.359116	0.00402222	0.0166667	0	1.3	0.978607	0.000763531	0.117525	1.86155	1.91507
E16 WT T0 controle du 130223 C9 - x40-10	2.76693	0.146602	0.156142	6.82119	0.237649	3.03704	2.88249	2.04752	0.913318	2.4554	0.710598	0.00817778	0.2	1.375	47.13	1.08291	0.00126022	0.132902	4.52547	4.58619
E16 WT T0 controle du 130223 C9 - x40-11	3.11827	0.09783	0.0457434	10.2218	0.17182	3.76791	2.48202	2.18524	0.889274	5.5198	0.846621	0.0146333	1.09833	1.86667	104.9	1.19816	0.00214723	0.671018	3.07419	8.32207
E16 WT T0 controle du 130223 C9 - x40-12	2.84139	0.134558	0.0517634	7.43174	0.274388	3.44144	3.18584	2.75673	0.88403	5.27612	0.840666	0.00934444	0.923333	2.25	52.1414	1.10026	0.00137191	1.01417	9.78227	12.5083
E16 WT T0 controle du 130223 C9 - x40-13	3.04027	0.107022	0.0892391	9.3439	0.213012	4.1573	1.55785	1.10426	0.96401	9.20909	0.902048	0.0124778	0.863333	1.92308	86.4916	1.15212	0.0018175	0.89721	1.00034	1.28854
E16 WT T0 controle du 130223 C9 - x40-14	2.71776	0.15514	0.246105	6.44577	0.44273	4.16751	2.03827	1.55917	0.971701	4.06275	0.802479	0.0143444	0.445	1.125	57.9392	1.18346	0.00272267	0.352044	2.09814	3.06427
E16 WT T0 controle du 130223 C9 - x40-15	2.76642	0.146688	0.0472544	6.81719	0.221914	2.85463	4.36873	3.67904	0.888897	4.752	0.826147	0.00798889	0.495	2	36.3788	1.06874	0.0012023	0.320813	21.2624	21.7108
E16 WT T0 controle du 130223 C9 - x40-16	2.11764	0.309587	0.629242	3.23011	0.649667	2.61333	2.47156	2.00115	1.00376	1.13869	0.532423	0.00325556	0.015	2	5.02564	0.899072	0.000556206	0.240874	1.76317	4.97495
E16 WT T0 controle du 130223 C9 - x40-2	2.95761	0.117706	0.0160537	8.49572	0.193643	2.76	5.13429	3.8522	0.738257	7.87135	0.887278	0.0168556	3.865	1.21053	85.8841	1.21574	0.00259407	2.00412	1.0783	22.9056
E16 WT T0 controle du 130223 C9 - x40-3	2.63057	0.171521	0.127336	5.83017	0.321965	3.1978	2.61819	1.85317	0.966642	5.72034	0.851198	0.00881111	0.281667	0.875	34.68	1.07658	0.00152386	0.15881	2.90658	3.07922
E16 WT T0 controle du 130223 C9 - x40-4	2.19805	0.282215	0.568478	3.5434	0.510116	2.95	1.73897	1.36687	1.16565	1.17901	0.541076	0.00392222	0.06	2	7.56021	0.995754	0.000658774	0.383808	3.54583	3.63096
E16 WT T0 controle du 130223 C9 - x40-5	2.52166	0.194435	0.166838	5.14311	0.446138	3.08065	3.49051	2.65959	0.896769	3.1028	0.756264	0.00487778	0.09	0.5	21.762	0.995261	0.000762614	0.477274	3.60408	9.90666
E16 WT T0 controle du 130223 C9 - x40-6	2.76094	0.147617	0.0863398	6.77428	0.152033	2.40625	3.16929	2.05592	0.910979	3.16456	0.759878	0.00731111	0.32	3.5	50.562	1.05651	0.00102077	0.46943	2.48168	4.1409
E16 WT T0 controle du 130223 C9 - x40-7	3.04037	0.107008	0.091616	9.34507	0.233716	4.32046	2.52417	1.73781	0.956322	5.79167	0.852761	0.0126778	0.866667	1.81818	91.2682	1.15591	0.00194135	0.681546	1.10701	4.28445
E16 WT T0 controle du 130223 C9 - x40-8	2.48496	0.202827	0.108631	4.9303	0.407123	2.57317	3.83277	3.34541	0.817961	2.73718	0.732419	0.00647778	0.245	1.14286	28.8548	1.04333	0.00103074	0.984442	6.98615	21.3707
E16 WT T0 controle du 130223 C9 - x40-9	2.94923	0.118847	0.0766603	8.41419	0.201137	3.4877	2.84956	2.63174	0.924234	3.35294	0.77027	0.00904444	0.23	4	50.5327	1.0981	0.00126686	0.18875	8.84819	10.0712
E17 CRE T0 controle du 130223 C1 - x40-2	3.1698	0.0921942	0.0485905	10.8467	0.219365	5.5	1.48734	1.21477	1.08264	14.1417	0.933957	0.0201889	0.68	1.5	131.838	1.24129	0.00304122	0.326756	1.51584	1.86811
E17 CRE T0 controle du 130223 C1 - x40-3	2.66093	0.16563	0.122159	6.03757	0.424513	3.28649	3.69489	2.59788	0.835457	5.35433	0.842627	0.00896667	0.241667	0.833333	47.1191	1.11308	0.00153054	0.367516	1.04039	5.76305
E17 CRE T0 controle du 130223 C1 - x40-4	2.85247	0.132852	0.0513052	7.52718	0.204314	3.27273	2.63253	2.00151	0.961898	5.24823	0.839955	0.00978889	0.51	3	50.3365	1.12336	0.00141333	0.87661	1.64213	6.57775
E17 CRE T0 controle du 130223 C1 - x40-5	2.39352	0.225344	0.406345	4.43765	0.458619	3.11409	1.83496	1.55111	1.03622	2.8326	0.73908	0.00966667	0.0666667	0.714286	23.5288	1.09185	0.00181069	0.305129	1.92761	1.93065
E17 CRE T0 controle du 130223 C1 - x40-6	2.91487	0.123643	0.158753	8.08777	0.321548	4.53125	2.1836	1.63269	0.988022	7.39487	0.88088	0.0181889	0.7	1.03571	98.0416	1.20699	0.0033269	0.377271	1.69046	2.03895
E17 CRE T0 controle du 130223 C1 - x40-7	3.02436	0.109	0.0826073	9.17432	0.2653	4.66556	2.4687	1.88523	0.987327	6.78838	0.871604	0.0208556	0.79	0.8	109.888	1.24743	0.00367009	0.0692451	3.21692	4.72756
E17 CRE T0 controle du 130223 C10 - x40-10	2.59632	0.178421	0.245993	5.60471	0.262754	2.93785	1.68925	1.22156	1.02259	3.75694	0.789781	0.00761111	0.07	2.2	35.2015	1.06546	0.00124633	0.157536	1.40939	1.4573
E17 CRE T0 controle du 130223 C10 - x40-11	2.87698	0.129155	0.126863	7.74261	0.256384	4.26341	1.74256	1.2225	1.08749	6.24286	0.861933	0.0112667	0.798333	1.08333	69.2403	1.14452	0.00180987	0.54029	1.5858	1.59336
E17 CRE T0 controle du 130223 C10 - x40-12	3.03941	0.107127	0.0587429	9.33474	0.310325	5.67876	1.85695	1.52616	1.09205	11.4659	0.919781	0.0121889	0.533333	1.04167	87.4222	1.17068	0.00184028	0.664231	1.21123	3.49542
E17 CRE T0 controle du 130223 C10 - x40-13	2.80674	0.140035	0.0432119	7.14107	0.258732	3.19643	3.89086	2.62211	0.879988	6.14286	0.86	0.00888889	0.551667	1.25	58.1395	1.08189	0.00133084	0.610328	6.47823	12.9142
E17 CRE T0 controle du 130223 C10 - x40-14	3.18493	0.0906023	0.0727667	11.0372	0.143384	4.3676	1.62233	1.1554	1.04504	6.82927	0.872274	0.0142667	0.87	2.92857	107.508	1.18428	0.00191832	0.308246	1.03837	1.05845
E17 CRE T0 controle du 130223 C10 - x40-15	2.93256	0.12115	0.0885751	8.25425	0.240078	3.62055	3.11555	2.29099	0.895202	3.7343	0.788776	0.0108889	0.46	2.85714	59.7995	1.12699	0.00164511	0.451754	5.63833	6.8506
E17 CRE T0 controle du 130223 C10 - x40-2	2.88897	0.127385	0.0725358	7.85021	0.169726	3.08974	2.5968	1.83718	0.95536	3.35484	0.77037	0.0075	0.303333	4.75	37.1558	1.0663	0.00102877	0.310316	5.38113	5.77035
E17 CRE T0 controle du 130223 C10 - x40-3	3.05868	0.104777	0.0466259	9.54407	0.22631	4.5	2.21247	1.79656	0.991121	8.5679	0.895484	0.0172222	0.746667	0.851852	122.888	1.20787	0.00268179	0.148106	1.73613	5.16802
E17 CRE T0 controle du 130223 C10 - x40-4	2.48631	0.202512	0.329828	4.93797	0.416792	2.98225	2.73719	1.80843	0.935482	2.22568	0.689988	0.00921111	0.193333	0.923077	43.6434	1.07367	0.00166533	0.104194	2.81914	2.95697
E17 CRE T0 controle du 130223 C10 - x40-5	3.13809	0.0956223	0.0636862	10.4578	0.181437	4.31095	2.05303	1.75406	0.967764	5.72671	0.851339	0.0120333	1.17833	2.58333	89.3373	1.1531	0.00166622	0.626441	2.21699	3.01241
E17 CRE T0 controle du 130223 C10 - x40-6	3.11448	0.0982575	0.1447	10.1773	0.207643	5.31418	1.39273	1.10719	1.14589	5.71818	0.85115	0.0164222	0.285	1.125	117.215	1.20003	0.00251438	0.0937852	1.01143	1.0713
E17 CRE T0 controle du 130223 C10 - x40-7	2.55045	0.188097	0.420062	5.31641	0.35403	3.47799	1.59211	1.05548	1.09949	2.52869	0.716609	0.00956667	0.146667	0.909091	48.5073	1.10101	0.00167314	0.248105	1.14228	1.26922
E17 CRE T0 controle du 130223 C10 - x40-8	2.91161	0.124109	0.107644	8.05745	0.218242	3.73384	2.21394	1.79436	0.991947	3.59922	0.782572	0.0131333	0.411667	1.6	68.653	1.16188	0.00202147	0.119927	2.65397	4.54208
E17 CRE T0 controle du 130223 C10 - x40-9	2.92292	0.122502	0.0724532	8.1631	0.237076	3.73745	2.39674	1.79861	0.940321	7.47727	0.882038	0.0124333	0.61	1.18182	80.5714	1.16616	0.00187682	0.628487	1.37411	2.22191
E17 CRE T0 controle du 130223 C2 - x40-10	3.01536	0.110134	0.0433364	9.07981	0.158938	3.00289	3.98523	2.64449	0.829561	4.08293	0.803263	0.0115778	1.225	1.07692	99.0968	1.15064	0.00168836	0.27881	10.916	12.5194
E17 CRE T0 controle du 130223 C2 - x40-11	2.48426	0.202991	0.150274	4.92633	0.279697	2.45902	2.39748	1.65185	0.943831	3.45638	0.775602	0.00737778	0.27	1.5	29.8563	1.04677	0.00122254	0.522102	3.17697	3.65235
E17 CRE T0 controle du 130223 C2 - x40-2	2.92702	0.121925	0.0577299	8.20175	0.177786	3.96567	1.91445	1.62264	1.14673	5.08434	0.835644	0.0112222	0.655	1.42857	68.2464	1.11847	0.00163517	0.389211	4.50129	4.51648
E17 CRE T0 controle du 130223 C2 - x40-3	2.62474	0.172677	0.256582	5.79118	0.384482	3.75177	2.20983	1.76302	1.0448	2.32	0.698795	0.00737778	0.223333	0.9	39.278	1.12822	0.00123123	0.522102	3.65877	3.76033
E17 CRE T0 controle du 130223 C2 - x40-4	2.74492	0.150364	0.0790221	6.65055	0.224934	2.6713	3.87427	3.29996	0.846909	2.99333	0.749583	0.00665556	0.36	2.25	33.6949	1.04114	0.000966367	0.261625	5.75115	10.8215
E17 CRE T0 controle du 130223 C2 - x40-5	2.95952	0.117447	0.0738261	8.51445	0.193335	3.73663	1.7359	1.13566	0.998086	7.87255	0.887293	0.0100556	0.698333	1.72727	58.6413	1.12352	0.00142476	1.06007	1.2339	1.35521
E17 CRE T0 controle du 130223 C2 - x40-6	2.75382	0.148831	0.0707454	6.71903	0.275362	3.53591	3.12454	2.47213	1.00287	5.68519	0.850416	0.00802222	0.32	2	50.4495	1.07957	0.0012039	0.424329	5.78633	6.03819
E17 CRE T0 controle du 130223 C2 - x40-7	2.59826	0.178023	0.313186	5.61726	0.39114	3.2	3.04477	2.30985	0.910876	1.15208	0.535334	0.0114778	0.55	1	38.5461	1.12736	0.00212451	0.528931	5.82834	7.74386
E17 CRE T0 controle du 130223 C2 - x40-8	3.07457	0.102877	0.123415	9.72035	0.268227	5.18828	2.01896	1.56324	1.0306	5.34804	0.842471	0.0143889	0.511667	0.769231	130.274	1.18876	0.00224821	0.200386	2.3593	3.08297
E17 CRE T0 controle du 130223 C2 - x40-9	2.8101	0.139494	0.0918576	7.16876	0.24306	3.36713	2.44476	1.69458	0.952707	4.69841	0.824513	0.0159556	0.538333	1.08333	56.6562	1.20118	0.00276134	0.142109	2.44296	6.24209
E17 CRE T0 controle du 130223 C3 - x40-2	3.01434	0.110264	0.0920768	9.06913	0.280469	4.58209	2.8252	2.08106	0.954015	5.1822	0.838245	0.0162111	0.533333	0.896552	125.645	1.19713	0.0026232	0.341348	2.06864	5.90347
E17 CRE T0 controle du 130223 C3 - x40-3	2.66316	0.165206	0.199319	6.05306	0.212484	2.80612	1.96742	1.59569	1.0057	2.49468	0.713851	0.0073	0.246667	3.66667	37.1514	1.05408	0.00110248	0.586505	1.28017	2.83828
E17 CRE T0 controle du 130223 C3 - x40-4	2.98089	0.114594	0.153373	8.72645	0.20683	4.12245	1.56933	1.31684	1.03875	3.98131	0.79925	0.0118444	0.286667	1.46667	81.8028	1.14141	0.00178411	0.261687	1.04592	2.05284
E17 CRE T0 controle du 130223 C3 - x40-5	3.01085	0.110709	0.0714138	9.0327	0.244898	4.47843	1.90819	1.58802	1.00188	6.39535	0.86478	0.0141333	0.528333	1.33333	71.7827	1.18747	0.00221343	0.567046	1.58397	4.31239
E17 CRE T0 controle du 130223 C3 - x40-6	3.01832	0.109761	0.0758145	9.11073	0.215475	4.09339	2.21963	1.72258	0.967901	5.88961	0.854854	0.0117889	0.753333	1.15789	81.57	1.1545	0.00176464	0.46458	2.183	4.00435
E17 CRE T0 controle du 130223 C3 - x40-7	2.51046	0.196958	0.137809	5.07723	0.267757	2.59119	3.53326	2.68915	0.986287	1.51923	0.603053	0.00582222	0.181667	6	18.7627	1.01089	0.000864893	0.617802	10.5097	10.7377
E17 CRE T0 controle du 130223 C3 - x40-8	2.63551	0.17055	0.280065	5.86339	0.257055	2.94505	1.84841	1.38639	0.990676	1.6494	0.622556	0.00738889	0.221667	2	36.5435	1.05698	0.00117073	0.164523	2.00227	2.94802
E17 CRE T0 controle du 130223 C3 - x40-9	3.10569	0.0992567	0.0225021	10.0749	0.204435	4.34426	2.95974	2.42818	0.953669	10.5906	0.913724	0.0220222	3.54	0.939394	128.285	1.25164	0.00364957	1.02295	6.90837	8.48505
E17 CRE T0 controle du 130223 C4 - x40-2	2.95712	0.117772	0.21323	8.49096	0.287524	4.624	1.9282	1.59205	1.0156	3.32551	0.768814	0.0163889	0.62	0.862069	113.019	1.20707	0.00281986	0.387079	1.74584	2.61635
E17 CRE T0 controle du 130223 C4 - x40-3	2.56275	0.185451	0.222427	5.39225	0.358547	3.02581	2.30272	1.36366	0.937127	3.77778	0.790698	0.00668889	0.353333	1	34.9601	1.06092	0.00108127	0.554355	1.63625	1.90683
E17 CRE T0 controle du 130223 C4 - x40-4	2.29385	0.252743	0.204895	3.95659	0.499391	2.53571	3.11959	2.63279	0.906898	2.53448	0.717073	0.00455556	0.101667	1.66667	13.932	0.974073	0.00075144	0.468521	3.19398	9.73214
E17 CRE T0 controle du 130223 C4 - x40-5	2.7978	0.141483	0.0772333	7.06799	0.235854	3.27234	2.51843	2.01579	0.953325	5.72857	0.85138	0.0104667	0.276667	1.3	56.0399	1.10759	0.0016132	0.346349	4.74326	4.99847
E17 CRE T0 controle du 130223 C4 - x40-6	3.23902	0.0851328	0.0458137	11.7464	0.141869	4.04208	2.24748	1.66624	0.913605	7.99415	0.888817	0.0170889	1.245	1.63158	115.296	1.21191	0.00234764	0.532433	1.16773	2.7591
E17 CRE T0 controle du 130223 C4 - x40-7	3.00073	0.112005	0.105599	8.92816	0.155336	3.24566	2.34156	1.37133	0.92237	3.2107	0.76251	0.0139889	0.543333	1.58333	75.9375	1.17927	0.00219973	0.084549	1.15177	1.90363
E17 CRE T0 controle du 130223 C4 - x40-8	2.95282	0.118357	0.0755948	8.44904	0.349	4.95726	2.26046	1.89606	0.993167	10.4504	0.912667	0.0166667	0.503333	0.628571	100	1.2084	0.00297026	0.381226	2.18385	4.85821
E17 CRE T0 controle du 130223 C5 - x40-10	2.70139	0.158093	0.102988	6.32541	0.269017	2.9205	3.13116	2.31407	0.890182	3.42466	0.773994	0.0107667	0.48	0.916667	71.7653	1.1282	0.00172219	0.132453	1.36051	9.01487
E17 CRE T0 controle du 130223 C5 - x40-11	2.10367	0.314609	0.454024	3.17855	0.559242	2.01905	4.72739	2.92637	0.84941	0.955801	0.488701	0.00393333	0.055	4	8.34682	0.989608	0.000680035	0.118846	4.15414	7.617
E17 CRE T0 controle du 130223 C5 - x40-2	2.8883	0.127484	0.0541178	7.84412	0.136465	2.51923	3.31631	2.22036	0.869388	3.39011	0.772215	0.00887778	0.448333	3.14286	59.7472	1.10234	0.00121393	0.0500313	1.48207	7.86837
E17 CRE T0 controle du 130223 C5 - x40-3	2.60846	0.175945	0.0971734	5.68359	0.267468	2.48069	3.47011	2.21407	0.843942	3.26425	0.765492	0.00914444	0.383333	1.125	42.173	1.07297	0.0014615	0.541139	1.62961	5.60449
E17 CRE T0 controle du 130223 C5 - x40-4	2.41355	0.220206	0.308104	4.54121	0.291022	2.20886	1.93104	1.46465	0.901642	2.33333	0.7	0.00522222	0.0466667	6	11.6839	1.00846	0.000865181	0.166312	1.86146	2.6373
E17 CRE T0 controle du 130223 C5 - x40-5	2.69643	0.158997	0.0771406	6.28944	0.271424	2.60079	3.93088	2.17821	0.793724	5.7	0.850746	0.00967778	0.395	1.18182	50.2686	1.10683	0.00158889	0.378831	4.52742	4.76757
E17 CRE T0 controle du 130223 C5 - x40-6	2.19215	0.284138	1.08606	3.51942	0.643343	3.0283	1.91712	1.55878	1.07277	0.693095	0.409366	0.00735556	0.03	0.166667	14.6458	1.1095	0.00143586	0.194331	2.0325	2.17873
E17 CRE T0 controle du 130223 C5 - x40-7	2.87274	0.129788	0.126231	7.70486	0.322275	3.91099	2.94785	2.20072	0.894147	3.47904	0.776738	0.00831111	0.365	1.54545	50.3287	1.09111	0.00126439	0.517088	3.64548	6.94456
E17 CRE T0 controle du 130223 C5 - x40-8	2.91063	0.124248	0.0678225	8.04841	0.154051	2.78694	3.26662	2.35309	0.882236	3.32086	0.768564	0.00897778	0.435	3.2	36.2319	1.08337	0.00129125	0.333746	6.62621	6.68216
E17 CRE T0 controle du 130223 C5 - x40-9	2.7368	0.151777	0.208122	6.58863	0.27861	3.30693	1.69413	1.22948	0.950893	5.05926	0.834963	0.00908889	0.236667	1.27273	45.3529	1.10366	0.00144687	0.288322	1.43247	1.45722
E17 CRE T0 controle du 130223 C6 - x40-10	3.04418	0.10654	0.198563	9.38611	0.333888	5.39695	2.05171	1.43062	0.995089	5.63971	0.849391	0.0200667	0.453333	0.657143	128.511	1.24828	0.00365911	0.216945	2.02324	2.10309
E17 CRE T0 controle du 130223 C6 - x40-11	2.60524	0.176598	0.18081	5.66256	0.329011	3.05882	2.17506	1.74811	0.941751	3.12183	0.757389	0.00902222	0.181667	0.888889	39.5707	1.11668	0.00157962	0.25306	2.75218	4.71825
E17 CRE T0 controle du 130223 C6 - x40-12	2.28317	0.255871	0.187806	3.90823	0.367195	1.97842	4.112	2.84044	0.835391	1.69863	0.629442	0.00437778	0.0483333	2.5	16.5161	0.947045	0.000685824	0.47794	4.97857	12.0316
E17 CRE T0 controle du 130223 C6 - x40-13	2.55976	0.18609	0.121657	5.37374	0.368375	3.29661	3.48076	2.30828	1.01076	3.63333	0.784173	0.00463333	0.231667	0.555556	27.0214	0.992955	0.000683377	0.747498	6.61821	6.81797
E17 CRE T0 controle du 130223 C6 - x40-14	2.66021	0.165767	0.197454	6.03257	0.270957	2.98895	1.69353	1.22468	0.951845	4	0.8	0.00711111	0.153333	2	35.5957	1.05484	0.00111194	0.33541	1.38397	1.79164
E17 CRE T0 controle du 130223 C6 - x40-15	2.81452	0.138786	0.036432	7.20532	0.205315	2.61132	4.27236	3.08045	0.799829	5.61261	0.848774	0.00815556	0.918333	1.36364	52.5859	1.05903	0.00114235	0.893513	5.40627	11.2126
E17 CRE T0 controle du 130223 C6 - x40-2	2.69926	0.158481	0.0395491	6.30992	0.287963	2.82524	3.9466	2.51482	0.83438	8.53521	0.895126	0.00752222	0.38	1.22222	47.6898	1.08234	0.00111612	0.415718	2.57637	12.5109
E17 CRE T0 controle du 130223 C6 - x40-3	2.85807	0.131999	0.05189	7.57583	0.212737	3.28293	2.41975	1.87114	0.939527	7.48649	0.882166	0.00697778	0.265	2.8	49.7401	1.05991	0.000956004	0.282166	5.50443	6.0722
E17 CRE T0 controle du 130223 C6 - x40-4	2.74802	0.149829	0.172836	6.67429	0.255038	3.12683	2.12312	1.4656	0.927676	3.2924	0.76703	0.00815556	0.235	4	32.8526	1.07297	0.00133423	0.380019	1.06711	2.26385
E17 CRE T0 controle du 130223 C6 - x40-5	2.96509	0.116698	0.0786477	8.56916	0.169363	3.76172	1.91325	1.37512	1.06669	5.36076	0.842786	0.0111667	1.04167	1.94118	68.5726	1.1256	0.00165203	1.00199	2.98272	2.98507
E17 CRE T0 controle du 130223 C6 - x40-6	2.83548	0.135477	0.0513204	7.38132	0.156525	2.66415	2.31407	1.83369	0.912289	4.824	0.828297	0.00808889	0.665	2.8	53.7313	1.08446	0.00109949	0.77122	2.48221	3.96974
E17 CRE T0 controle du 130223 C6 - x40-7	3.00436	0.111538	0.0784251	8.96553	0.162455	4.08429	1.83718	1.37068	1.13025	5.04839	0.834667	0.0125	0.875	1.6875	85.2918	1.14974	0.00173493	0.745952	1.87981	1.97003
E17 CRE T0 controle du 130223 C6 - x40-8	3.13486	0.0959785	0.0491756	10.419	0.164294	4.19872	1.88786	1.34121	0.994214	8.11594	0.890302	0.0139778	1.49167	3	88.5938	1.18733	0.00197317	0.838274	2.80134	2.80361
E17 CRE T0 controle du 130223 C6 - x40-9	2.86752	0.13057	0.126918	7.65871	0.344814	4.4	2.44124	1.98795	0.978374	4.90972	0.830787	0.00945556	0.348333	1.23077	56.0127	1.10901	0.00144336	0.445634	2.27103	4.08751
E17 CRE T0 controle du 130223 C7 - x40-1-12	2.78682	0.143283	0.0368466	6.97919	0.244755	2.98131	5.33408	3.90087	0.863448	4.68376	0.82406	0.00738889	0.673333	2.14286	47.3011	1.05734	0.00105279	0.164523	27.3113	27.3375
E17 CRE T0 controle du 130223 C7 - x40-1-2	2.75337	0.148909	0.0925722	6.71552	0.341023	4.02841	1.65583	1.31703	1.02722	9.95062	0.908681	0.00985556	0.516667	0.809524	56.8189	1.11452	0.00166015	0.830642	1.01379	3.1066
E17 CRE T0 controle du 130223 C7 - x40-1-3	2.75436	0.14874	0.134493	6.72315	0.322406	3.96111	1.95821	1.61899	1.03763	4.70064	0.824581	0.00994444	0.341667	1.125	42.9322	1.09677	0.00156491	0.425448	3.69168	3.76622
E17 CRE T0 controle du 130223 C7 - x40-1-4	2.87497	0.129455	0.0323973	7.72466	0.229512	3.63636	3.43936	2.82176	0.982618	6.12879	0.859724	0.0104556	1.48167	1.64286	57.1384	1.1107	0.00159604	0.78509	22.131	22.1552
E17 CRE T0 controle du 130223 C7 - x40-1-5	2.82953	0.136408	0.0921231	7.33097	0.295837	4.02273	2.42022	1.80501	1.00886	5.98745	0.856886	0.0185556	1.19	0.884615	72.9064	1.19881	0.00337401	0.513879	5.36027	5.36428
E17 CRE T0 controle du 130223 C7 - x40-1-6	3.08918	0.101161	0.0304154	9.88519	0.140821	3.8206	1.75983	1.26718	1.02994	9.35577	0.903435	0.0119667	1.125	1.75	90.0473	1.15948	0.0016415	0.711362	1.769	2.17798
E17 CRE T0 controle du 130223 C7 - x40-1-7	2.63614	0.170426	0.160305	5.86765	0.25711	3.20238	1.58778	1.15381	1.07634	3.71127	0.787743	0.00743333	0.253333	0.75	45.0019	1.05726	0.00117314	0.382737	1.93598	2.17487
E17 CRE T0 controle du 130223 C7 - x40-1-8	2.80633	0.140101	0.107389	7.1377	0.29715	3.83516	2.33614	1.82693	0.985685	5.03968	0.834428	0.00845556	0.205	1.5	65.537	1.08643	0.00131041	0.130701	1.37638	6.10477
E17 CRE T0 controle du 130223 C7 - x40-1-9	2.21026	0.278275	0.138931	3.59357	0.347862	1.8069	3.43997	2.49285	0.852518	2.384	0.704492	0.0047	0.0966667	0	12.4866	0.988861	0.000725773	0.601417	3.32601	7.58433
E17 CRE T0 controle du 130223 C7 - x40-3	3.0013	0.111932	0.0519868	8.93401	0.129718	3.23151	1.64703	1.27501	1.00429	5.80405	0.853029	0.0111889	1.2	4.8	69.3085	1.13164	0.00156872	0.681723	1.50203	1.87149
E17 CRE T0 controle du 130223 C8 - x40-10	2.37069	0.231346	0.283088	4.32253	0.251623	2.13665	2.83026	1.71924	0.985416	1.47059	0.595238	0.0056	0.12	0	9.72	0.969083	0.000894019	0.498012	1.9199	2.15716
E17 CRE T0 controle du 130223 C8 - x40-2	2.96234	0.117067	0.146298	8.54212	0.23738	4.3253	1.56754	1.3008	1.03927	5.02381	0.833992	0.0140556	0.458333	1.13333	97.0616	1.16975	0.00221643	0.240224	1.07214	1.96619
E17 CRE T0 controle du 130223 C8 - x40-3	2.93283	0.121113	0.21465	8.25675	0.276694	4.38813	2.23893	1.68072	1.01035	2.17994	0.685529	0.0119778	0.32	2.08333	70.9621	1.15592	0.00196377	0.204313	2.74187	4.29579
E17 CRE T0 controle du 130223 C8 - x40-4	3.09241	0.100786	0.0667791	9.92205	0.241647	4.89338	1.83808	1.52093	1.00327	7.52381	0.882682	0.0159111	0.573333	0.894737	100.83	1.1773	0.00252188	0.560576	1.78621	3.78246
E17 CRE T0 controle du 130223 C8 - x40-5	2.27064	0.259589	0.852916	3.85225	0.581292	3.21649	1.6605	1.43046	1.09514	1.23077	0.551724	0.0058	0.0233333	0.714286	21.6701	1.01991	0.00104101	0.223178	1.483	1.90843
E17 CRE T0 controle du 130223 C8 - x40-6	2.91594	0.123491	0.0766003	8.09778	0.240235	3.78927	2.31883	1.74446	0.954711	6.32716	0.863521	0.0131889	0.73	1	93.1522	1.16925	0.00204421	0.468017	2.29477	3.97717
E17 CRE T0 controle du 130223 C8 - x40-7	2.66465	0.164923	0.14156	6.06344	0.292448	3.13609	3.66858	2.74677	0.956413	1.67841	0.626645	0.00675556	0.255	1.5	28.937	1.03911	0.0010279	0.602899	9.87703	10.2446
E17 CRE T0 controle du 130223 C8 - x40-8	3.08359	0.101814	0.0930226	9.8218	0.269457	5.01439	2.63159	1.95354	0.983518	5.33597	0.842171	0.0178111	0.611667	0.931034	139.523	1.2228	0.00291829	0.308943	2.02029	6.01364
E17 CRE T0 controle du 130223 C8 - x40-9	2.86869	0.130394	0.166238	7.66904	0.194616	3.29461	1.84556	1.47576	0.973809	3.53723	0.779601	0.00947778	0.213333	1.9	60.1504	1.10411	0.00142106	0.552093	1.22535	2.04414
E17 CRE T0 controle du 130223 C9 - x40-10	2.7588	0.14798	0.0545208	6.75766	0.327042	3.20183	3.59876	3.08644	0.828516	8.32967	0.892815	0.00943333	0.306667	1.2	45.6412	1.12732	0.00150475	0.13728	1.83613	9.40756
E17 CRE T0 controle du 130223 C9 - x40-11	2.52553	0.193571	0.134137	5.16607	0.233202	2.19792	3.11068	1.93065	0.881019	2.31875	0.698682	0.0059	0.171667	3.25	19.9353	1.01848	0.000913156	0.216982	3.08877	7.68209
E17 CRE T0 controle du 130223 C9 - x40-2	2.88284	0.128288	0.0972565	7.79498	0.184187	3.21774	2.75355	1.8459	0.961848	3.2551	0.764988	0.00926667	0.54	1.36364	62.0705	1.08897	0.00138514	0.326672	1.90592	4.62735
E17 CRE T0 controle du 130223 C9 - x40-3	2.35995	0.234223	0.304645	4.26943	0.490975	2.69466	3.39394	2.5222	0.900748	1.51852	0.602941	0.00604444	0.09	2	9.56098	0.993544	0.00106086	0.428746	8.51676	8.80863
E17 CRE T0 controle du 130223 C9 - x40-4	2.21116	0.277989	0.109452	3.59727	0.565923	2.24211	5.59877	4.12158	0.828523	3.29231	0.767025	0.0031	0.0916667	1.5	9.04673	0.940639	0.000476316	0.40161	22.9787	31.0938
E17 CRE T0 controle du 130223 C9 - x40-5	3.09146	0.100896	0.0761926	9.91121	0.201067	4.32819	2.63239	2.17672	0.973888	4.85057	0.829077	0.0113111	0.546667	2.07143	100.333	1.15758	0.00155506	0.505374	3.70802	4.21364
E17 CRE T0 controle du 130223 C9 - x40-6	2.77301	0.145579	0.270132	6.86914	0.463614	4.85207	1.7632	1.51376	1.0374	4.64179	0.822751	0.0126	0.303333	0.956522	75.8371	1.15812	0.00230294	0.214139	1.33168	2.21802
E17 CRE T0 controle du 130223 C9 - x40-7	2.59783	0.178112	0.354609	5.61446	0.377778	3.16463	2.63387	1.80841	0.917059	2.26923	0.694118	0.00755556	0.13	1.75	39.1864	1.08355	0.00129703	0.115045	1.35526	2.98126
E17 CRE T0 controle du 130223 C9 - x40-8	2.50633	0.197897	0.613765	5.05314	0.383023	3.29688	1.93124	1.19275	1.05421	1.87565	0.652252	0.00616667	0.0716667	1	28.1796	1.00503	0.00111274	0.189832	1.42078	1.54044
E17 CRE T0 controle du 130223 C9 - x40-9	2.52295	0.194147	0.288618	5.15074	0.286589	2.88321	2.05595	1.39091	1.04563	2.86777	0.741453	0.0052	0.0566667	2	31.7723	0.994422	0.000775719	0.323575	1.32267	1.32866
E2 CRE T0 controle du 031023 C1 - x40-1	3.24346	0.0846981	0.181918	11.8066	0.261025	6.14089	2.12977	1.56013	1.01804	4.00824	0.800329	0.0202556	0.78	0.808511	220.349	1.2642	0.00332746	0.308056	1.26345	2.83321
E2 CRE T0 controle du 031023 C1 - x40-2	3.37846	0.0725063	0.0905052	13.7919	0.230012	6.46602	2.23085	1.61702	0.977546	6.4598	0.865948	0.0329889	1.87167	0.753425	312.956	1.33835	0.00535323	0.183525	2.56849	3.13765
E2 CRE T0 controle du 031023 C1 - x40-3	3.27232	0.08193	0.139513	12.2055	0.265823	6.15894	1.83607	1.17332	0.978707	6.21875	0.861472	0.0205333	1.18667	1.02174	176.445	1.25645	0.00321547	0.427669	1.1446	1.18254
E2 CRE T0 controle du 031023 C1 - x40-4	3.20168	0.0888719	0.041554	11.2522	0.24635	4.71336	3.27654	2.64243	0.843953	7.27673	0.879179	0.0146222	0.765	1.16667	156.85	1.20964	0.0021115	0.60895	1.7794	9.64837
E2 CRE T0 controle du 031023 C1 - x40-5	3.18261	0.0908447	0.0645074	11.0078	0.304255	6.4	1.68647	1.29417	1.05405	10.5691	0.913563	0.0158111	1.34167	0.818182	177.97	1.20526	0.00238272	0.901704	1.2958	2.83522
E2 CRE T0 controle du 031023 C1 - x40-6	3.14543	0.0948174	0.104363	10.5466	0.268245	5.10938	2.54632	2.01827	0.935385	5.72527	0.851307	0.0136	0.725	1.14286	148.979	1.17937	0.00196299	0.460889	3.25395	3.31564
E2 CRE T0 controle du 031023 C1 - x40-7	3.36664	0.0734996	0.0259536	13.6055	0.138441	5.20155	2.14618	1.44906	1.02751	10.5364	0.913318	0.0193556	1.84333	0.880952	218.052	1.24003	0.002731	0.259161	4.34063	4.72883
E2 CRE T0 controle du 031023 C10 - x40-1	2.85386	0.13264	0.664731	7.53923	0.418596	5.38889	1.59857	1.18979	1.10478	2.01412	0.668229	0.0118556	0.125	0.740741	99.237	1.17016	0.00219204	0.126224	1.28627	1.35054
E2 CRE T0 controle du 031023 C10 - x40-10	3.35713	0.0743085	0.0585406	13.4574	0.280844	7.60156	1.78427	1.35828	1.06588	13.1017	0.929087	0.0184889	1.24	0.677419	244.647	1.24733	0.00273462	0.559017	2.09953	2.14629
E2 CRE T0 controle du 031023 C10 - x40-11	3.25647	0.0834394	0.0688308	11.9847	0.244802	6.46559	1.40726	1.08336	1.09036	12.9901	0.928521	0.0157	0.795	1.20513	178.549	1.20704	0.00232441	0.271297	1.56563	1.60023
E2 CRE T0 controle du 031023 C10 - x40-12	3.01282	0.110458	0.216303	9.05325	0.290467	4.96035	1.77365	1.25212	1.01662	4.42291	0.815597	0.0136778	0.39	0.787879	127.653	1.1874	0.00224028	0.166192	1.29171	1.6029
E2 CRE T0 controle du 031023 C10 - x40-13	3.08227	0.10197	0.178284	9.80683	0.349628	5.50562	2.23778	1.6112	0.949454	4.03662	0.801454	0.0198667	0.723333	0.584906	163.472	1.23599	0.00355076	0.361763	1.5702	3.16421
E2 CRE T0 controle du 031023 C10 - x40-14	2.81969	0.137962	0.257103	7.24838	0.446726	5.36979	1.42939	1.269	1.1084	5.88034	0.854658	0.0178889	0.448333	0.44898	116.861	1.22021	0.0034552	0.264927	1.34067	1.8082
E2 CRE T0 controle du 031023 C10 - x40-15	2.95601	0.117923	0.128028	8.48011	0.340696	4.43697	2.77258	1.96096	0.896401	4.87619	0.829822	0.0137111	0.355	0.529412	115.562	1.15728	0.0023257	0.342789	4.03562	5.57837
E2 CRE T0 controle du 031023 C10 - x40-16	2.98644	0.113864	0.282872	8.78244	0.382825	5.68984	1.63413	1.17982	1.04709	4.50943	0.818493	0.0129778	0.381667	0.542857	149.46	1.15743	0.00211285	0.261712	1.17468	1.35816
E2 CRE T0 controle du 031023 C10 - x40-17	2.94157	0.1199	0.231729	8.34027	0.354729	5.5731	1.90793	1.60779	1.12194	2.98084	0.748797	0.0115444	0.235	0.6	105.136	1.14873	0.00197585	0.292676	3.26548	3.91302
E2 CRE T0 controle du 031023 C10 - x40-18	3.16465	0.0927425	0.0403529	10.7825	0.226741	4.51393	3.30446	2.32382	0.879161	9.24648	0.902405	0.0161667	1.86667	2	109.977	1.19916	0.00241686	0.506317	3.59977	6.61675
E2 CRE T0 controle du 031023 C10 - x40-2	2.73068	0.15285	0.0944208	6.54236	0.35047	3.03239	4.81388	3.25052	0.782933	3.61504	0.783317	0.0115889	0.238333	0.894737	80.2154	1.1644	0.00197671	0.24964	1.58576	12.3268
E2 CRE T0 controle du 031023 C10 - x40-3	3.10923	0.0988535	0.247509	10.116	0.32628	5.95045	1.97295	1.22944	1.02978	4.1015	0.803979	0.0150778	0.278333	0.628571	157.1	1.18386	0.00256233	0.21886	1.34016	1.36553
E2 CRE T0 controle du 031023 C10 - x40-4	2.41504	0.219828	0.421863	4.54901	0.471166	3.00952	2.62294	1.84334	0.963817	1.57718	0.611979	0.00426667	0.151667	0	15.834	1.01707	0.000687077	0.326758	4.00852	4.12279
E2 CRE T0 controle du 031023 C10 - x40-5	2.96456	0.116768	0.100875	8.56401	0.337844	5.02137	1.80186	1.54754	1.00876	6.72165	0.870494	0.0166444	1.05	0.581395	155.982	1.19968	0.00286476	0.660238	2.52874	4.37967
E2 CRE T0 controle du 031023 C10 - x40-6	2.38428	0.227754	0.423479	4.3907	0.504744	2.74046	3.36438	2.19537	0.878525	1.01515	0.503759	0.00591111	0.04	1.6	20.4328	1.02607	0.00101784	0.15632	2.70693	6.32133
E2 CRE T0 controle du 031023 C10 - x40-7	3.18838	0.0902432	0.096862	11.0812	0.263682	5.40767	2.38036	1.5712	0.950351	6.3981	0.86483	0.0173444	1.15833	0.95122	193.423	1.22673	0.00263586	0.392923	2.14076	2.59722
E2 CRE T0 controle du 031023 C10 - x40-8	3.11881	0.0977685	0.141096	10.2282	0.376755	6.60811	1.61144	1.33495	1.05256	7.84865	0.886988	0.0181889	0.555	0.438596	174.249	1.24064	0.00313536	0.398531	2.25973	2.2612
E2 CRE T0 controle du 031023 C10 - x40-9	2.69145	0.159912	0.649273	6.25344	0.436209	4.125	1.62214	1.07409	0.998751	1.63971	0.62117	0.00797778	0.138333	0.866667	74.2691	1.09775	0.00141107	0.373197	1.29132	1.67846
E2 CRE T0 controle du 031023 C2 - x40-1	2.68691	0.16075	0.183801	6.22085	0.407712	3.78659	2.23336	1.77245	0.953281	4.11613	0.80454	0.00881111	0.163333	0.866667	62.0705	1.09154	0.00149633	0.433467	1.52124	3.7651
E2 CRE T0 controle du 031023 C2 - x40-2	2.78965	0.142817	0.101322	7.00195	0.374683	3.91284	3.16488	2.24762	0.912939	5.31551	0.84166	0.0131222	0.711667	0.470588	89.9406	1.15811	0.00235476	0.477256	4.31722	6.5565
E2 CRE T0 controle du 031023 C2 - x40-3	3.24504	0.0845441	0.0889677	11.8281	0.199838	5.52215	1.57163	1.1074	1.04436	8.21277	0.891455	0.0192444	1.16333	1.02326	229.291	1.26232	0.00277584	0.433179	1.20037	1.24694
E2 CRE T0 controle du 031023 C2 - x40-4	3.35495	0.0744953	0.0884939	13.4237	0.208558	6.261	2.08683	1.41848	1.02131	6.74231	0.87084	0.0223667	0.808333	0.716418	277.13	1.27097	0.003389	0.0498383	1.31203	1.76916
E2 CRE T0 controle du 031023 C2 - x40-5	3.16589	0.0926103	0.165943	10.7979	0.352888	6.62143	1.78061	1.52128	1.03227	6.30841	0.863171	0.0260667	0.935	0.388889	219.04	1.27857	0.00486615	0.14888	2.35827	2.36404
E2 CRE T0 controle du 031023 C2 - x40-6	2.90549	0.124986	0.100654	8.0009	0.258905	3.97736	2.28549	1.55715	0.97698	5.87065	0.854453	0.0153444	0.893333	0.65625	96.2449	1.19506	0.00266927	0.45825	2.13458	3.07236
E2 CRE T0 controle du 031023 C2 - x40-7	3.11025	0.0987373	0.043863	10.1279	0.192313	4.47351	2.81208	2.19652	1.00722	7.90566	0.887712	0.0157333	1.35167	1.33333	144.372	1.19495	0.00231202	0.545267	6.19244	6.21337
E2 CRE T0 controle du 031023 C2 - x40-8	3.01362	0.110356	0.170168	9.06157	0.276327	4.94561	1.93851	1.36862	1.03826	4.35178	0.813146	0.0150444	0.49	1.25806	120.342	1.18715	0.00237951	0.112051	1.13168	1.85445
E2 CRE T0 controle du 031023 C3 - x40-1	3.25112	0.083955	0.0619699	11.9111	0.226962	5.35882	2.71512	2.06941	0.944363	5.84559	0.853921	0.0206889	1.07167	0.754717	229.444	1.25577	0.00330068	0.0732842	7.80214	10.7401
E2 CRE T0 controle du 031023 C3 - x40-10	2.73007	0.152958	0.0585609	6.53774	0.292982	3.34104	3.00352	2.40993	0.944134	4.75926	0.826367	0.00691111	0.926667	1.15385	52.3268	1.0759	0.00101973	1.11839	6.13166	16.7559
E2 CRE T0 controle du 031023 C3 - x40-3	2.9252	0.122181	0.264931	8.18458	0.30217	4.5625	1.80685	1.08692	1.0141	2.66507	0.727154	0.00851111	0.165	0.944444	86.1059	1.10081	0.00129633	0.371996	1.2519	1.83017
E2 CRE T0 controle du 031023 C3 - x40-4	3.03062	0.108217	0.167256	9.24069	0.297221	4.88991	2.23326	1.50457	0.970636	3.9486	0.797923	0.0117667	0.626667	0.806452	116.682	1.16591	0.00181881	0.40418	1.87765	2.35877
E2 CRE T0 controle du 031023 C3 - x40-5	2.80354	0.140551	0.152029	7.11485	0.36258	3.90789	3.01455	1.93958	0.912169	4.64706	0.822917	0.0138667	0.308333	1.09091	99.0857	1.17591	0.00244543	0.385016	2.26684	4.46423
E2 CRE T0 controle du 031023 C3 - x40-6	3.20314	0.0887222	0.0343843	11.2711	0.193711	4.66333	2.51634	1.87286	0.940051	11.5102	0.920065	0.0136222	1.24	1.14706	164.682	1.18899	0.00187173	0.574044	3.47582	3.56861
E2 CRE T0 controle du 031023 C3 - x40-7	2.78415	0.143724	0.404976	6.95779	0.383774	4.42361	1.83728	1.29634	1.02628	2.23786	0.691154	0.00741111	0.06	1	56.2278	1.09319	0.00119237	0.309761	1.38517	1.86962
E2 CRE T0 controle du 031023 C3 - x40-8	3.27184	0.0819754	0.0169778	12.1988	0.15451	4.5496	2.07352	1.75909	0.948808	17.7805	0.946753	0.0171111	1.35	1.26316	200.741	1.23981	0.00227856	0.205445	1.41312	5.30439
E2 CRE T0 controle du 031023 C3 - x40-9	2.98576	0.113953	0.0880337	8.77556	0.374497	5.73248	2.19389	1.72628	1.06744	6.89623	0.873357	0.0093	0.811667	0.75	101.209	1.14369	0.00144178	0.809147	5.21744	6.25674
E2 CRE T0 controle du 031023 C4 - x40-1	3.11994	0.0976421	0.0385243	10.2415	0.197021	4.40864	2.85892	1.96891	0.969807	10.4188	0.912425	0.0148444	0.995	1.02632	155.23	1.18497	0.0020833	0.199175	2.72684	4.17475
E2 CRE T0 controle du 031023 C4 - x40-2	2.776	0.14508	0.254062	6.89277	0.313105	3.92268	1.67504	1.42321	1.01705	2.51449	0.715464	0.0107778	0.365	1	64.1513	1.1374	0.00179673	0.577945	1.18394	2.76633
E2 CRE T0 controle du 031023 C4 - x40-3	2.38284	0.228132	0.267034	4.38344	0.422295	2.85484	2.04086	1.41958	1.00221	2.57931	0.720617	0.00576667	0.1	1.5	16.2674	1.06946	0.000993148	0.466612	3.56742	3.82235
E2 CRE T0 controle du 031023 C4 - x40-4	3.24412	0.0846337	0.0410251	11.8156	0.158634	4.61675	2.36117	1.69706	0.981028	7.93839	0.888123	0.0209556	2.10167	0.864865	191.934	1.25066	0.00304329	1.04028	3.6347	3.83027
E2 CRE T0 controle du 031023 C4 - x40-5	2.72303	0.154202	0.121964	6.48501	0.251896	2.99078	2.38974	1.39187	0.91889	4.53472	0.819322	0.00885556	0.303333	1	48.5207	1.07073	0.00144985	0.510861	1.5575	1.68973
E2 CRE T0 controle du 031023 C4 - x40-6	2.44691	0.211909	0.334896	4.719	0.426843	2.9125	2.72894	1.78909	0.944674	2.47982	0.712629	0.00862222	0.2	0.75	44.0072	1.0744	0.00157456	0.143592	2.49217	3.15161
E2 CRE T0 controle du 031023 C5 - x40-1	3.24589	0.0844619	0.0675472	11.8397	0.202829	5.02492	2.10638	1.73924	0.942378	7.2514	0.878808	0.0164111	1.24833	0.894737	161.606	1.24149	0.00241092	0.443107	1.72484	2.28896
E2 CRE T0 controle du 031023 C5 - x40-10	3.00264	0.11176	0.19578	8.94773	0.257526	4.63333	1.83673	1.50495	1.0204	3.27727	0.766206	0.0104556	0.446667	1.27778	91.6075	1.14377	0.00157324	0.321064	1.17222	2.13593
E2 CRE T0 controle du 031023 C5 - x40-2	3.08498	0.101651	0.147096	9.83756	0.23315	4.31183	2.08664	1.72909	0.907729	4.19651	0.807563	0.0132222	0.481667	0.666667	159.9	1.16211	0.0021615	0.298455	2.52786	3.72094
E2 CRE T0 controle du 031023 C5 - x40-3	3.03551	0.107609	0.0797246	9.29291	0.218676	3.95849	2.38051	1.95578	0.910914	4.25389	0.809665	0.0112667	0.436667	0.896552	112.565	1.14925	0.00166171	0.198615	1.61175	7.39521
E2 CRE T0 controle du 031023 C5 - x40-4	3.0556	0.105149	0.154825	9.51032	0.302426	5.11055	1.99445	1.36342	0.977154	5.19048	0.838462	0.0101111	0.25	1.5	106.455	1.11895	0.00152957	0.267261	1.92508	1.95683
E2 CRE T0 controle du 031023 C5 - x40-5	3.25305	0.0837687	0.121984	11.9376	0.289893	6.25067	2.29803	1.67026	0.972501	5.30882	0.841492	0.0333667	1.03167	0.52	333.488	1.34018	0.00599041	0.201559	1.09395	4.19224
E2 CRE T0 controle du 031023 C5 - x40-6	3.00195	0.111848	0.172697	8.94072	0.303003	5.35391	1.71831	1.4138	1.08787	4.01488	0.800593	0.0187222	0.683333	0.488889	162.36	1.22183	0.00333909	0.414858	2.00164	4.3486
E2 CRE T0 controle du 031023 C5 - x40-7	2.51539	0.195844	0.458608	5.10609	0.45265	3.19872	2.13825	1.58167	0.93112	2.06452	0.673684	0.00844444	0.168333	0.888889	45.125	1.10496	0.00156658	0.292449	2.52516	2.55453
E2 CRE T0 controle du 031023 C5 - x40-8	2.87531	0.129405	0.0694988	7.72765	0.293745	3.71713	2.59222	1.96111	0.887513	6.53247	0.867241	0.0128889	0.441667	0.909091	87.6829	1.1624	0.0021395	0.0415227	1.01562	6.94241
E2 CRE T0 controle du 031023 C5 - x40-9	2.58925	0.179878	0.272331	5.55931	0.442683	3.93333	1.84806	1.24145	1.06339	4.37778	0.81405	0.00806667	0.128333	0.75	43.8596	1.06261	0.0014166	0.259794	2.1588	2.17644
E2 CRE T0 controle du 031023 C6- x40-1	3.31092	0.0783691	0.052389	12.7601	0.263493	6.21752	2.22989	1.70942	0.949244	12.0189	0.923188	0.023	1.29667	0.633803	264.532	1.26948	0.00372555	0.177203	4.72833	4.97861
E2 CRE T0 controle du 031023 C6- x40-2	3.21047	0.0879774	0.163876	11.3666	0.293037	6.07194	1.92934	1.38473	0.986819	5.90945	0.855271	0.0195	0.768333	0.648148	205.953	1.25034	0.00328814	0.205342	1.80909	2.2977
E2 CRE T0 controle du 031023 C6- x40-3	3.05965	0.10466	0.0753094	9.55473	0.2564	4.62835	2.60706	1.99229	0.956641	5.83871	0.853774	0.0141333	0.805	0.857143	89.6354	1.18635	0.00217659	0.198263	3.37672	4.91498
E2 CRE T0 controle du 031023 C6- x40-4	3.05059	0.105757	0.173936	9.45565	0.23068	4.67483	1.57356	1.21851	1.02936	4.9812	0.83281	0.0176778	0.841667	0.882353	137.607	1.22156	0.00291285	0.417258	1.34773	1.62139
E2 CRE T0 controle du 031023 C6- x40-5	2.3194	0.245417	0.56122	4.0747	0.56446	3.02326	3.14977	2.18022	0.987558	1.26573	0.558642	0.0036	0.0366667	1.25	16.7127	0.978592	0.000585827	0.175682	3.89413	3.9042
E2 CRE T0 controle du 031023 C6- x40-6	2.63802	0.170056	0.519792	5.8804	0.387368	3.34483	2.82602	1.9288	0.913913	1.21503	0.548539	0.0117889	0.173333	1.05556	60.7285	1.16364	0.00229778	0.0921008	1.06899	4.12913
E2 CRE T0 controle du 031023 C6- x40-7	3.02228	0.109261	0.0634787	9.15237	0.221657	4.01608	2.48957	1.8945	0.932025	5.36052	0.84278	0.0164667	1.30833	0.892857	117.445	1.2205	0.00264407	0.572067	1.39708	5.57924
E2 CRE T0 controle du 031023 C6- x40-8	3.24471	0.0845763	0.065659	11.8236	0.247735	5.55932	2.89645	2.36189	0.944664	7.27568	0.879164	0.0170111	1.10667	0.75	206.337	1.23459	0.00261335	0.21686	2.34051	6.84868
E2 CRE T0 controle du 031023 C6- x40-9	2.95611	0.11791	0.120159	8.48106	0.250693	4.22541	2.25423	1.90994	0.995057	3.74194	0.789116	0.0130667	0.66	0.709677	129.004	1.17431	0.00212771	0.268847	3.09304	5.31654
E2 CRE T0 controle du 031023 C7 - x40-1	3.26782	0.0823556	0.0780081	12.1425	0.244432	5.53106	2.57267	1.64467	0.921345	8.72727	0.897196	0.0190222	1.195	0.846154	209.303	1.25263	0.00295437	0.351897	1.7956	2.70529
E2 CRE T0 controle du 031023 C7 - x40-2	3.10198	0.099682	0.0635313	10.0319	0.241103	4.73391	2.24858	1.60125	0.961027	7.2931	0.879418	0.0106889	0.771667	0.9	121.04	1.1249	0.0015178	0.619335	1.40044	3.00239
E2 CRE T0 controle du 031023 C7 - x40-3	3.31878	0.0776631	0.138536	12.8761	0.225752	6.39806	1.49732	1.24536	1.0458	6.56452	0.867804	0.0208444	0.803333	0.816327	217.46	1.25148	0.0032534	0.190387	1.13143	1.27932
E2 CRE T0 controle du 031023 C7 - x40-4	3.21292	0.0877296	0.0859738	11.3987	0.294731	5.78485	2.63277	1.93592	0.934813	6.5661	0.867832	0.0248	1.28833	0.754386	209.483	1.29767	0.00416675	0.661607	1.22739	5.40982
E2 CRE T0 controle du 031023 C7 - x40-5	2.56292	0.185416	0.320225	5.39328	0.4432	3.84615	2.38628	1.79763	1.07121	2.29762	0.696751	0.00615556	0.14	0.625	36.0725	1.03263	0.00106342	0.350348	3.0428	4.19586
E2 CRE T0 controle du 031023 C7 - x40-6	2.71578	0.155495	0.119723	6.43108	0.347826	3.97024	1.76348	1.47571	1.04677	4.90345	0.830607	0.00951111	0.521667	0.555556	52.9339	1.1325	0.00162787	0.810273	3.26166	5.6341
E2 CRE T0 controle du 031023 C7 - x40-7	2.67374	0.163205	0.594928	6.12726	0.402997	3.83594	1.68043	1.27892	0.986176	1.59391	0.614481	0.00567778	0.0316667	1.42857	50.5605	1.04326	0.000885366	0.1595	1.03773	1.6226
E2 CRE T0 controle du 031023 C8 - x40-1	3.51169	0.0621956	0.0695688	16.0783	0.226465	8.83498	1.48587	1.08417	1.15469	13.141	0.929284	0.0245111	1.68167	0.938272	351.61	1.29572	0.00346062	0.609683	1.28342	1.3091
E2 CRE T0 controle du 031023 C8 - x40-10	2.90875	0.124518	0.276545	8.03097	0.353287	4.87845	1.84099	1.26936	1.022	4.28571	0.810811	0.0106889	0.178333	1.15789	82.0628	1.11692	0.00177446	0.420375	1.44924	1.54759
E2 CRE T0 controle du 031023 C8 - x40-11	2.57396	0.183074	0.142046	5.46227	0.359288	2.87603	3.89848	3.48794	0.878414	2.26263	0.693498	0.00358889	0.14	1.6	26.4688	0.94948	0.000496792	0.0786889	12.7342	16.3249
E2 CRE T0 controle du 031023 C8 - x40-12	2.98964	0.113444	0.149754	8.81489	0.288406	4.38785	2.57367	1.73756	0.9269	3.16129	0.75969	0.0100333	0.448333	0.909091	103.92	1.12499	0.00153647	0.599926	1.0448	3.63916
E2 CRE T0 controle du 031023 C8 - x40-13	2.21996	0.275186	0.371079	3.63391	0.598291	2.83871	2.42381	2.04456	1.00993	2	0.666667	0.00466667	0.055	1.25	12.4321	1.01957	0.000841186	0.449868	6.27852	7.30924
E2 CRE T0 controle du 031023 C8 - x40-2	3.05076	0.105736	0.109486	9.45751	0.330849	5.42202	2.39383	1.84221	0.996711	5.8674	0.854385	0.0138111	0.631667	0.615385	145.432	1.19673	0.0022649	0.228676	3.33751	4.28612
E2 CRE T0 controle du 031023 C8 - x40-3	2.82614	0.136942	0.119459	7.30238	0.258703	4.08642	1.83711	1.33724	1.10022	3.30263	0.767584	0.00726667	0.476667	1.77778	55.5558	1.06273	0.00107685	0.641338	3.74741	3.82965
E2 CRE T0 controle du 031023 C8 - x40-4	1.9632	0.36983	0.750917	2.70394	0.56446	2	2.0812	1.26588	0.984501	1.7	0.62963	0.0018	0	1	6.62745	0.843964	0.000274984	0.111111	1.73898	1.74017
E2 CRE T0 controle du 031023 C8 - x40-5	3.18989	0.0900864	0.0633745	11.1005	0.192888	4.73684	2.33663	1.90113	0.971619	4.71359	0.824979	0.0130778	0.628333	1.37037	140.228	1.17984	0.00182283	0.455309	4.98679	6.14393
E2 CRE T0 controle du 031023 C8 - x40-6	3.28153	0.0810666	0.0598714	12.3355	0.277572	6.39073	2.39018	2.17642	0.983342	8.41063	0.893737	0.0216444	1.17667	0.888889	225.087	1.25726	0.0034667	0.193583	8.11516	8.32812
E2 CRE T0 controle du 031023 C8 - x40-7	3.28994	0.0802855	0.0603382	12.4555	0.256407	6.16066	1.97753	1.33294	0.976787	11.6643	0.921038	0.0201222	1.37667	1.02273	206.576	1.25958	0.00308371	0.342144	1.14163	2.3348
E2 CRE T0 controle du 031023 C8 - x40-8	3.10342	0.0995162	0.106128	10.0486	0.334218	5.51379	1.92641	1.6101	0.949138	6.90196	0.873449	0.0223889	1.385	0.869565	173.755	1.26452	0.00396025	0.55111	1.3209	3.86017
E2 CRE T0 controle du 031023 C8 - x40-9	2.92447	0.122284	0.124497	8.17772	0.308361	4.27099	2.53792	1.99656	0.940518	3.71519	0.787919	0.0165556	0.575	0.8	102.563	1.20827	0.00290453	0.25646	6.87984	7.00637
E2 CRE T0 controle du 031023 C9 - x40-1	3.21921	0.0870962	0.0945279	11.4816	0.266613	6.40523	1.72487	1.45129	1.08042	7.91923	0.887883	0.0257667	1.28667	0.915254	234.592	1.28434	0.00432422	0.295138	3.02115	3.07511
E2 CRE T0 controle du 031023 C9 - x40-10	3.27923	0.0812808	0.0736627	12.303	0.203562	5.72664	1.78916	1.56144	1.03167	5.57534	0.847917	0.016	1.25667	1.37838	199.866	1.21339	0.00220279	0.50346	2.55522	3.20156
E2 CRE T0 controle du 031023 C9 - x40-11	3.07404	0.102941	0.115612	9.71433	0.294773	5.40079	2.0873	1.46117	1.024	5.70386	0.850832	0.0173556	0.783333	0.454545	156.46	1.22116	0.00295175	0.151814	3.38316	3.42297
E2 CRE T0 controle du 031023 C9 - x40-12	2.88533	0.12792	0.124704	7.81739	0.344051	4.57604	2.49255	2.08777	0.997967	5	0.833333	0.0142667	0.616667	0.647059	109.952	1.18262	0.00241115	0.480135	5.4151	5.44708
E2 CRE T0 controle du 031023 C9 - x40-13	3.04205	0.106802	0.0698071	9.36309	0.242307	4.18107	2.60176	2.25627	0.907164	5.41781	0.844184	0.0104111	0.58	0.888889	105.589	1.11933	0.00151221	0.196011	8.26031	8.26472
E2 CRE T0 controle du 031023 C9 - x40-2	3.06028	0.104584	0.134198	9.56171	0.299088	5.67788	1.56622	1.15893	1.0858	6.18343	0.860791	0.0134889	1.25167	0.710526	136.731	1.18751	0.00211012	0.667558	1.33549	1.87326
E2 CRE T0 controle du 031023 C9 - x40-3	3.21044	0.0879804	0.11064	11.3662	0.205266	5.26756	2.22197	1.50419	1.02291	5.47458	0.84555	0.0169778	0.746667	1.27273	170.975	1.20876	0.00256981	0.257098	2.08593	2.21004
E2 CRE T0 controle du 031023 C9 - x40-4	3.01351	0.11037	0.139802	9.06043	0.383947	5.83756	2.18109	1.63017	1.03979	5.41	0.843994	0.0142444	0.363333	0.666667	136.992	1.18694	0.00242756	0.291588	1.9003	4.39189
E2 CRE T0 controle du 031023 C9 - x40-5	2.50126	0.199055	0.638726	5.02374	0.503679	3.65289	1.61612	1.3168	1.02455	1.70175	0.62987	0.00684444	0.085	0.642857	46.9716	1.0618	0.00122103	0.332249	1.30303	1.96111
E2 CRE T0 controle du 031023 C9 - x40-6	2.92276	0.122525	0.0572775	8.16159	0.309376	4.14831	2.61858	2.1435	0.913803	8.38525	0.89345	0.0127222	0.851667	0.580645	102.616	1.14475	0.00205925	0.357087	1.44075	8.1061
E2 CRE T0 controle du 031023 C9 - x40-7	3.28739	0.0805211	0.130694	12.4191	0.3693	7.3213	1.90002	1.24517	0.970081	10.8547	0.915646	0.0235778	1.03833	0.430108	294.93	1.27129	0.00412545	0.186743	1.01414	1.30143
E2 CRE T0 controle du 031023 C9 - x40-8	3.23684	0.085346	0.138816	11.717	0.239179	5.84488	1.57839	1.11998	1.01999	6.80258	0.871837	0.0202	0.918333	0.685185	211.509	1.24598	0.0032656	0.335799	1.06165	1.26296
E2 CRE T0 controle du 031023 C9 - x40-9	2.24699	0.266752	0.619525	3.7488	0.494055	2.47115	2.73762	2.00949	0.93782	0.879397	0.467914	0.00415556	0	1.33333	16.0514	0.9927	0.000713636	0.0731272	3.07097	5.61013
E20 CRE T0 controle du 130223 C1 - x40-10	3.12761	0.096783	0.0844098	10.3324	0.240807	5	2.11503	1.68504	0.98613	6.88696	0.873208	0.0201556	0.888333	0.833333	127.841	1.24998	0.00322634	0.117395	1.78462	2.94694
E20 CRE T0 controle du 130223 C1 - x40-11	2.95921	0.117489	0.0986487	8.51142	0.285465	4.50584	2.84878	2.60413	0.990824	3.66139	0.785472	0.0163667	1.51167	1.28571	91.8548	1.19231	0.00273384	0.54964	11.6964	11.7886
E20 CRE T0 controle du 130223 C1 - x40-12	3.14457	0.0949115	0.0362961	10.5361	0.202783	5.13816	1.98287	1.602	1.08296	13.575	0.931389	0.0194333	1.26	1.53846	148.597	1.25151	0.00276494	0.365774	2.69615	3.74622
E20 CRE T0 controle du 130223 C1 - x40-13	2.78189	0.144098	0.0606923	6.93972	0.294781	3.64497	2.8943	2.56563	0.967391	7.14286	0.877193	0.00696667	0.206667	2	48.3073	1.03886	0.00103572	0.215063	8.00567	8.6903
E20 CRE T0 controle du 130223 C1 - x40-14	2.92305	0.122485	0.0812302	8.16429	0.224528	3.76285	2.11633	1.48627	0.972664	5.9359	0.855823	0.0120222	0.775	1.05556	78.7257	1.1403	0.001886	0.820824	1.93815	3.4143
E20 CRE T0 controle du 130223 C1 - x40-2	2.99827	0.112323	0.0189837	8.90287	0.196071	3.43785	3.18288	2.36056	0.872069	15.163	0.93813	0.0165222	1.8	1.7	115.845	1.22558	0.0024382	0.8775	1.16271	7.1329
E20 CRE T0 controle du 130223 C1 - x40-3	2.71266	0.156053	0.0651333	6.40807	0.232209	2.80269	3.64165	2.24617	0.90763	4.04667	0.801849	0.00841111	0.468333	1.875	39.5799	1.06308	0.00125378	0.568899	5.57128	8.49754
E20 CRE T0 controle du 130223 C1 - x40-4	2.64173	0.169332	0.248273	5.90557	0.352796	3.58333	2.24748	2.0351	1.02156	2.44444	0.709677	0.00792222	0.126667	2.28571	50.5929	1.1034	0.0013144	0.149801	3.31345	5.07294
E20 CRE T0 controle du 130223 C1 - x40-5	2.84623	0.13381	0.198763	7.47326	0.258375	3.68692	2.05862	1.25394	0.970573	3.45729	0.775648	0.00985556	0.533333	1.73333	62.2805	1.12322	0.00151331	0.605313	1.24726	1.43511
E20 CRE T0 controle du 130223 C1 - x40-6	2.88936	0.127328	0.173845	7.85375	0.286173	4.60633	1.46314	1.11744	1.09639	4.52479	0.818998	0.0148556	0.688333	1.36842	62.211	1.20187	0.00254309	0.638458	1.36431	1.72125
E20 CRE T0 controle du 130223 C1 - x40-7	3.04053	0.106989	0.0593545	9.34675	0.215564	4.2921	1.83092	1.45372	0.989055	7.93711	0.888107	0.0157889	1.52	1	114.422	1.19117	0.00237934	0.6525	2.37859	2.6663
E20 CRE T0 controle du 130223 C1 - x40-8	2.83136	0.136121	0.212923	7.34639	0.336738	4.1699	1.76147	1.36151	0.978152	4.75661	0.826287	0.0120889	0.326667	0.75	56.8142	1.14281	0.0020805	0.412355	1.08237	1.60637
E20 CRE T0 controle du 130223 C1 - x40-9	2.76355	0.147173	0.17086	6.79472	0.329971	4.16848	1.68025	1.25623	1.06799	5.25926	0.840237	0.0112667	0.126667	0.769231	54.2547	1.11483	0.00189441	0.346865	2.08882	2.10845
E20 CRE T0 controle du 130223 C10 - x40-10	3.09849	0.100083	0.120876	9.99166	0.291109	5.64	1.80583	1.54783	1.0462	6.06502	0.858457	0.0253556	1.29	1	117.121	1.29148	0.00448148	0.340773	1.14954	2.60926
E20 CRE T0 controle du 130223 C10 - x40-11	3.02923	0.10839	0.0881576	9.22597	0.237991	4.60766	2.84754	2.35083	1.02374	3.63636	0.784314	0.00963333	0.606667	2.07692	73.7882	1.11762	0.00139549	0.339618	7.49418	7.73023
E20 CRE T0 controle du 130223 C10 - x40-12	2.8914	0.127029	0.20904	7.87221	0.294337	4.65104	1.60389	1.38886	1.08901	3.83019	0.792969	0.0113778	0.095	2.33333	55.8732	1.14196	0.00183934	0.268823	1.64103	2.24818
E20 CRE T0 controle du 130223 C10 - x40-13	2.71275	0.156039	0.184628	6.40867	0.376207	3.6568	2.78832	2.10658	0.930294	3.20455	0.762162	0.00822222	0.0583333	0.923077	44.8245	1.08223	0.00139531	0.116248	3.68647	7.2064
E20 CRE T0 controle du 130223 C10 - x40-14	2.71372	0.155863	0.215714	6.41587	0.239521	2.94366	2.00125	1.08516	0.937476	3.31818	0.768421	0.00844444	0.291667	2	46.6182	1.08969	0.00132927	0.0512989	1.248	1.26224
E20 CRE T0 controle du 130223 C10 - x40-15	2.19592	0.282907	0.723903	3.53473	0.503374	2.54737	2.38978	1.85365	1.01576	0.874372	0.466488	0.00414444	0.00333333	2	8.29885	1.00202	0.000724819	0.103556	2.86767	4.14984
E20 CRE T0 controle du 130223 C10 - x40-16	2.97163	0.115821	0.18149	8.63401	0.329111	5.28311	1.6089	1.32682	1.06661	4.85656	0.829251	0.0158778	0.285	0.892857	103.967	1.19571	0.00272437	0.0748219	2.30663	2.66443
E20 CRE T0 controle du 130223 C10 - x40-17	2.48437	0.202964	0.376532	4.92699	0.41195	3.19286	2.40656	1.86029	1.00966	1.46241	0.593893	0.00727778	0.125	2	28.8843	1.07205	0.00127593	0.199235	1.6771	5.36008
E20 CRE T0 controle du 130223 C10 - x40-2	2.81311	0.139012	0.0290151	7.19362	0.118048	1.84772	5.00626	2.97627	0.747582	3.82249	0.792638	0.00905556	0.95	20	41.6347	1.09525	0.00125553	0.768234	1.01167	8.5359
E20 CRE T0 controle du 130223 C10 - x40-3	2.74506	0.150341	0.0821998	6.65156	0.271044	3.24757	3.50118	2.97631	0.937812	2.74419	0.732919	0.00894444	0.376667	1	46.7051	1.09675	0.00140298	0.445823	14.3383	14.8559
E20 CRE T0 controle du 130223 C10 - x40-4	3.00105	0.111964	0.167693	8.93141	0.247402	4.86463	1.37753	1.15994	1.09504	4.81221	0.827948	0.0137556	0.476667	1.9375	82.0488	1.18475	0.00218551	0.268123	1.22813	1.762
E20 CRE T0 controle du 130223 C10 - x40-5	2.59117	0.179482	0.21347	5.5716	0.319106	2.9375	2.64892	2.19089	0.933318	2.44245	0.709509	0.0106333	0.111667	1.2	41.0736	1.14363	0.00182775	0.228575	1.20932	6.27179
E20 CRE T0 controle du 130223 C10 - x40-6	3.19339	0.0897247	0.132156	11.1452	0.239095	5.31949	1.71415	1.29099	0.976105	5.91051	0.855293	0.0197333	0.653333	0.756098	155.494	1.22585	0.00320016	0.189832	1.54913	1.74859
E20 CRE T0 controle du 130223 C10 - x40-7	2.64791	0.168132	0.136822	5.94771	0.381818	3.34951	2.79243	2.13094	0.91139	4.49231	0.817927	0.0119	0.325	0.857143	41.645	1.13517	0.00212636	0.519462	3.26246	6.31973
E20 CRE T0 controle du 130223 C10 - x40-8	2.3389	0.239969	0.134785	4.1672	0.392314	2.42222	2.34348	1.75265	0.928009	5.20253	0.838776	0.00544444	0.193333	1.33333	21.0438	1.06939	0.000904575	0.486554	3.32208	5.76
E20 CRE T0 controle du 130223 C10 - x40-9	3.03415	0.107778	0.143351	9.27837	0.263627	4.26885	2.74082	2.04387	0.896075	3.38936	0.772176	0.0174111	0.355	1.70588	114.983	1.2165	0.00283815	0.0252619	1.06575	5.26336
E20 CRE T0 controle du 130223 C2 - x40-10	2.41986	0.218614	0.105497	4.57428	0.45122	2.95425	3.39381	2.5946	0.961457	4.1457	0.805663	0.00863333	0.566667	0.235294	33.1246	1.04659	0.00155908	0.868437	15.6794	15.6914
E20 CRE T0 controle du 130223 C2 - x40-11	1.66239	0.522888	2.04365	1.91245	0.918149	2.08108	2.12807	1.65362	1.13564	0.0978723	0.0891473	0.00573333	0	0	0	1.0475	0.00119855	0	2.79287	2.89196
E20 CRE T0 controle du 130223 C2 - x40-12	3.01567	0.110095	0.035299	9.08304	0.219979	3.44915	4.20729	2.48701	0.809638	8.33766	0.892907	0.0159778	1.05167	0.758621	110.106	1.21638	0.00244501	0.392028	2.47581	6.75479
E20 CRE T0 controle du 130223 C2 - x40-13	2.80632	0.140103	0.205769	7.13763	0.206417	3.03475	2.08959	1.39496	0.935828	3.03766	0.752332	0.0107222	0.573333	1.08333	85.4008	1.13385	0.00161334	0.548195	1.2557	1.30449
E20 CRE T0 controle du 130223 C2 - x40-14	2.67527	0.162919	0.0917035	6.13803	0.358722	3.12621	4.36719	3.87989	0.850375	3.33663	0.769406	0.00973333	0.45	0.571429	51.8828	1.09127	0.0015812	0.318745	22.8066	23.5672
E20 CRE T0 controle du 130223 C2 - x40-15	2.28221	0.256153	0.0944562	3.90391	0.233845	1.43534	4.83982	3.75707	0.760313	2.04737	0.671848	0.00643333	0.185	4	29.9846	1.01858	0.00100656	0.578844	6.3027	17.4427
E20 CRE T0 controle du 130223 C2 - x40-16	2.42338	0.217729	0.168355	4.59286	0.496689	2.89726	3.54798	3.17824	0.89508	3.1411	0.758519	0.0075	0.208333	0.727273	22.3613	1.07415	0.00133289	0.19245	10.3945	14.3631
E20 CRE T0 controle du 130223 C2 - x40-2	2.67463	0.163038	0.0796709	6.13354	0.249736	2.73684	3.45164	2.44102	0.892891	5.03285	0.834241	0.0183667	0.885	1.06667	76.5954	1.21168	0.00329275	0.088682	3.87592	9.36633
E20 CRE T0 controle du 130223 C2 - x40-3	2.38604	0.227292	0.167833	4.39963	0.507452	2.75	3.62893	3.17068	0.877444	3.15244	0.759178	0.00756667	0.243333	0.777778	20.5203	1.07538	0.00134678	0.1916	10.21	14.2125
E20 CRE T0 controle du 130223 C2 - x40-4	3.01862	0.109722	0.0643978	9.11391	0.212834	4.38931	2.32753	1.79796	1.04393	5.84865	0.853986	0.0140778	1.21667	1.25	94.049	1.1633	0.00212931	0.59064	4.16605	4.17939
E20 CRE T0 controle du 130223 C2 - x40-5	2.79911	0.141271	0.216726	7.07862	0.329985	4.05761	2.07928	1.75478	0.997873	3.56805	0.781088	0.0171556	0.291667	0.76	102.74	1.20045	0.00305822	0.143963	1.06473	3.05339
E20 CRE T0 controle du 130223 C2 - x40-6	2.57559	0.182731	0.438542	5.47254	0.341528	3.15736	2.01237	1.39362	0.987238	2.22257	0.689689	0.0114222	0.103333	0.6875	54.1834	1.1337	0.00209973	0.220541	2.194	2.7139
E20 CRE T0 controle du 130223 C2 - x40-7	2.85639	0.132254	0.237874	7.5612	0.372281	4.55285	2.405	1.73996	0.986862	3.15714	0.75945	0.0194	0.546667	0.6	97.1953	1.21806	0.00365498	0.0986739	3.45465	3.52456
E20 CRE T0 controle du 130223 C2 - x40-8	2.9216	0.122688	0.0839597	8.15075	0.286059	4.58304	1.95995	1.62551	1.0513	7.32645	0.879901	0.0223889	1.67833	0.725	127.256	1.25515	0.00400176	0.718421	3.38792	3.4297
E20 CRE T0 controle du 130223 C2 - x40-9	3.04853	0.106008	0.041256	9.43323	0.162079	3.5861	2.52804	1.69715	0.944277	5.88525	0.854762	0.014	1.145	1.21053	93.3045	1.1875	0.00199018	0.517932	5.15244	5.23177
E20 CRE T0 controle du 130223 C3 - x40-10	1.77994	0.456704	1.6281	2.1896	0.874644	2.125	1.83339	1.40428	1.03772	0.542714	0.351792	0.00341111	0	0	0.592593	0.938573	0.00064471	0.057073	1.11036	2.08264
E20 CRE T0 controle du 130223 C3 - x40-2	3.1736	0.0917916	0.0479046	10.8942	0.138704	4.11798	1.93485	1.22115	1.01494	6.58421	0.868147	0.0160111	1.73667	1.35294	111.811	1.20741	0.00228532	0.944321	2.24725	2.41523
E20 CRE T0 controle du 130223 C3 - x40-3	3.08845	0.101246	0.0323901	9.8769	0.200828	4.175	3.80234	2.84037	0.943244	7.32	0.879808	0.0161778	1.42	1.875	85.5277	1.1961	0.00246053	0.0786214	15.1136	15.584
E20 CRE T0 controle du 130223 C3 - x40-4	2.83636	0.13534	0.0755408	7.38881	0.278834	3.30638	3.90491	2.78051	0.847433	4.4321	0.815909	0.00977778	0.676667	1.25	71.1365	1.11244	0.0015438	0.449747	2.36387	9.55624
E20 CRE T0 controle du 130223 C3 - x40-5	2.46672	0.207131	0.0857693	4.82787	0.347428	2.01058	6.3266	4.09681	0.706536	2.82171	0.738337	0.00547778	0.266667	1.75	24.794	0.98345	0.000841834	0.669534	10.631	28.1077
E20 CRE T0 controle du 130223 C3 - x40-6	2.78122	0.14421	0.0663141	6.93432	0.311209	3.29787	4.00595	3.13795	0.85252	4.23158	0.808853	0.0110444	0.656667	1.58333	53.2948	1.13084	0.00178052	0.387168	13.4044	18.1576
E20 CRE T0 controle du 130223 C3 - x40-7	3.00515	0.111437	0.123013	8.97368	0.226228	4.53689	2.02217	1.55579	1.06295	4.04583	0.801817	0.0134556	0.325	2.45455	86.0154	1.16685	0.00200968	0.363486	2.58377	2.58477
E20 CRE T0 controle du 130223 C3 - x40-8	2.24476	0.267438	0.511647	3.73918	0.506053	2.5566	2.35554	1.53711	0.961145	2.00719	0.667464	0.00464444	0.0233333	1.5	15.6129	1.0304	0.000802144	0.0691714	1.8026	2.69034
E20 CRE T0 controle du 130223 C3 - x40-9	2.94885	0.118899	0.0714026	8.41051	0.233429	3.77444	3.12526	2.41742	0.928864	4.78571	0.82716	0.0126	1.06833	0.772727	84.1802	1.16825	0.00196694	0.535347	2.76307	9.83956
E20 CRE T0 controle du 130223 C4 - x40-10	2.89458	0.126566	0.297975	7.90104	0.28404	4.20472	1.92448	1.59726	0.998536	2.50361	0.71458	0.0161556	0.316667	1.82353	71.2069	1.21029	0.00285662	0.0586412	1.65211	3.00832
E20 CRE T0 controle du 130223 C4 - x40-11	2.89332	0.126749	0.114156	7.88962	0.259259	3.90459	2.42563	1.89568	0.97197	3.97134	0.798847	0.0173444	0.566667	1.05	108.6	1.22021	0.00287223	0.129058	3.19719	5.01253
E20 CRE T0 controle du 130223 C4 - x40-12	2.20142	0.281121	0.246507	3.55718	0.608392	2.45794	4.3629	3.15118	0.885879	1.62048	0.618391	0.00483333	0.123333	1.25	8.92565	1.03552	0.000834959	0.625144	14.8218	17.6365
E20 CRE T0 controle du 130223 C4 - x40-2	2.86711	0.130633	0.11686	7.65505	0.235802	3.82677	1.91261	1.669	1.02946	2.77353	0.734996	0.0142556	1.04667	1.54545	58.5631	1.16657	0.00250145	0.537016	4.26298	5.5055
E20 CRE T0 controle du 130223 C4 - x40-3	2.55373	0.187388	0.297086	5.33652	0.28839	2.6631	2.50618	1.77796	0.929266	2.13575	0.681097	0.0077	0.055	1	31.0191	1.06412	0.00128059	0.107443	2.79483	2.80944
E20 CRE T0 controle du 130223 C4 - x40-4	3.02288	0.109186	0.0960825	9.15869	0.275248	4.88476	1.63707	1.2731	1.01659	8.86747	0.898657	0.0182	0.805	0.513514	130.925	1.21522	0.0031223	0.247083	2.11545	2.18272
E20 CRE T0 controle du 130223 C4 - x40-5	2.07361	0.325686	1.15214	3.07045	0.6656	2.5814	2.43464	1.70888	1.0305	0.606178	0.377404	0.00462222	0.025	1.5	4.30573	1.00926	0.000869516	0.138675	1.24135	2.43593
E20 CRE T0 controle du 130223 C4 - x40-6	3.1964	0.0894143	0.0506031	11.1839	0.186373	5.17697	1.78051	1.46527	1.07224	9.8593	0.907913	0.0240111	1.93	1.44737	184.712	1.27686	0.00357	0.560954	2.40446	2.40912
E20 CRE T0 controle du 130223 C4 - x40-7	2.87963	0.128762	0.322277	7.76627	0.368116	4.74194	2.03506	1.46957	1.00635	2.69577	0.72942	0.0155222	0.226667	0.619048	81.3974	1.18113	0.00281398	0.372651	2.29653	2.31161
E20 CRE T0 controle du 130223 C4 - x40-8	3.05042	0.105778	0.156498	9.45376	0.229334	5.07435	1.50269	1.24421	1.12084	4.66212	0.823388	0.0184333	0.42	1.12	105.71	1.24149	0.00306609	0.0736543	1.25151	2.01193
E20 CRE T0 controle du 130223 C4 - x40-9	2.35253	0.236234	0.305757	4.2331	0.358338	2.2931	3.40446	2.3358	0.904939	0.910811	0.476662	0.00785556	0.16	8	29.0831	1.05112	0.00140578	0.376089	6.41062	8.06545
E20 CRE T0 controle du 130223 C5 - x40-1	3.23426	0.0856006	0.0678909	11.6822	0.196395	5.48955	1.5804	1.28449	1.06035	7.92308	0.887931	0.0219111	1.24667	1.22857	169.01	1.25695	0.00333232	0.5	2.37166	2.42337
E20 CRE T0 controle du 130223 C5 - x40-3	3.06068	0.104536	0.0701835	9.5661	0.176848	4.02532	2.14388	1.52838	1.00061	6.17857	0.860697	0.0156333	0.816667	1.1875	97.7176	1.20478	0.00237468	0.572405	1.56757	1.81211
E20 CRE T0 controle du 130223 C5 - x40-4	3.03703	0.107421	0.0405364	9.30914	0.218731	3.81469	3.32723	2.48535	0.87618	7.6746	0.884721	0.0121444	0.581667	0.961538	98.7394	1.16909	0.00173258	0.273903	1.8709	9.25777
E20 CRE T0 controle du 130223 C5 - x40-5	2.69084	0.160025	0.168201	6.24904	0.361654	3.47664	2.81913	2.27522	0.925122	3.64198	0.784574	0.0125333	0.436667	1.875	47.9503	1.152	0.00215006	0.549016	2.75955	4.21747
E20 CRE T0 controle du 130223 C5 - x40-6	3.01297	0.110438	0.0522036	9.05483	0.228198	3.98718	3.05563	2.48296	0.921784	5.85845	0.854194	0.0166889	1.16167	1.15385	98.781	1.20917	0.00269359	0.619265	6.6031	12.6767
E20 CRE T0 controle du 130223 C5 - x40-7	2.93198	0.121231	0.113749	8.24868	0.225582	3.78992	2.38624	2.00575	0.96737	3.62419	0.783746	0.0237889	1.07167	0.956522	120.679	1.26	0.00421457	0.241628	1.96775	6.58345
E20 CRE T0 controle du 130223 C5 - x40-8	2.87841	0.128944	0.0824924	7.75531	0.242394	3.43929	3.05944	2.19802	0.900758	4.92754	0.831296	0.0136333	0.696667	1.77778	58.3686	1.16654	0.00215022	0.400692	5.20727	5.26615
E20 CRE T0 controle du 130223 C6 - x40-10	2.91962	0.122968	0.17834	8.13217	0.232405	3.6888	2.30701	1.86241	0.940927	3.11688	0.757098	0.0105667	0.236667	2.3	60.0889	1.13816	0.00164776	0.0648544	1.00789	3.23984
E20 CRE T0 controle du 130223 C6 - x40-11	2.88099	0.128561	0.131997	7.77844	0.264993	3.84711	2.5597	1.70559	0.960782	3.48819	0.777193	0.0126667	0.85	1.29412	70.5418	1.13854	0.00207761	0.731497	3.91438	4.19355
E20 CRE T0 controle du 130223 C6 - x40-12	2.76691	0.146606	0.159628	6.82102	0.289502	3.47162	1.98749	1.6158	0.945925	4.17225	0.80666	0.0120111	0.435	1.66667	62.7936	1.18027	0.00196659	0.250808	1.04804	3.76161
E20 CRE T0 controle du 130223 C6 - x40-13	2.58563	0.18063	0.124662	5.53618	0.341015	2.78423	3.27433	2.35445	0.861208	3.44487	0.775021	0.0129889	0.243333	0.916667	34.9713	1.14714	0.00242891	0.374554	1.41849	7.8725
E20 CRE T0 controle du 130223 C6 - x40-2	2.97084	0.115927	0.0244794	8.62609	0.162459	3.4359	1.85995	1.34606	0.988223	13.9878	0.933279	0.0136556	1.25167	1.1	83.7838	1.15831	0.00207096	0.436347	3.04788	3.64357
E20 CRE T0 controle du 130223 C6 - x40-3	2.8544	0.132558	0.175432	7.54385	0.218647	3.904	1.54485	1.31474	1.10674	2.91765	0.744745	0.0148	0.456667	0.928571	93.1613	1.16715	0.00251487	0.41824	2.26268	2.3081
E20 CRE T0 controle du 130223 C6 - x40-4	2.12585	0.306676	0.38474	3.26077	0.441498	2.13178	2.66971	2.11327	0.983919	0.945017	0.485866	0.00628889	0.1	1.33333	13.9782	1.03894	0.00113034	0.438839	4.25533	7.1392
E20 CRE T0 controle du 130223 C6 - x40-5	2.41582	0.219632	0.160091	4.55308	0.406897	2.53977	3.57947	2.37932	0.874476	3.76398	0.790091	0.00852222	0.131667	2.5	14.5809	1.07036	0.00156345	0.148877	4.54277	6.19068
E20 CRE T0 controle du 130223 C6 - x40-6	2.75588	0.148479	0.251045	6.73494	0.27915	3.41606	2.01142	1.46323	0.960003	3.12064	0.757319	0.0170778	0.36	1.25	53.6942	1.18843	0.00311618	0.331594	2.04886	2.17131
E20 CRE T0 controle du 130223 C6 - x40-7	2.9546	0.118115	0.0610537	8.4663	0.263623	3.97727	2.76589	2.21528	0.914956	6.94805	0.874183	0.0136	0.705	1.2	78.5981	1.16176	0.00211261	0.611037	1.39822	7.44462
E20 CRE T0 controle du 130223 C6 - x40-8	2.49755	0.199908	0.383357	5.00231	0.300343	2.60664	2.83698	2.15569	0.950826	0.82197	0.451143	0.0106889	0.206667	5.5	15.8733	1.1013	0.00204635	0.144187	8.50739	8.64481
E20 CRE T0 controle du 130223 C6 - x40-9	2.74083	0.151075	0.470056	6.61925	0.369071	4	1.8028	1.39065	0.994709	2.17529	0.685068	0.0122778	0.158333	2.5	53.3699	1.13399	0.00223515	0.248069	1.48251	1.88828
E20 CRE T0 controle du 130223 C7 - x40-2	2.43109	0.215805	0.439395	4.6338	0.286837	2.11151	4.01544	2.77136	0.85082	0.667102	0.400157	0.0141889	0.318333	6	38.3562	1.16009	0.0028969	0.139918	6.15657	6.18411
E20 CRE T0 controle du 130223 C7 - x40-3	3.07686	0.102607	0.0647321	9.74595	0.243433	4.46519	2.3022	1.67843	0.928595	7.73298	0.885492	0.0185333	0.686667	0.648649	132.87	1.22752	0.0030194	0.0346272	3.01674	5.03985
E20 CRE T0 controle du 130223 C7 - x40-4	2.59843	0.177987	0.136867	5.61839	0.289738	3.1039	2.04666	1.42515	1.02634	5.06316	0.835069	0.0064	0.105	1.5	24.7006	1.02418	0.00100882	0.294628	2.36186	2.36437
E20 CRE T0 controle du 130223 C7 - x40-5	3.0207	0.109459	0.037974	9.13582	0.163098	3.45679	1.9458	1.62013	0.936916	7.36364	0.880435	0.0132889	1.54333	2.30769	88.9231	1.16676	0.00194419	0.233126	1.54618	6.33312
E20 CRE T0 controle du 130223 C7 - x40-6	2.59458	0.178777	0.24214	5.59355	0.309889	3	3.15578	1.93491	0.963453	2.23757	0.691126	0.00651111	0.211667	1.66667	26.1951	1.02868	0.00107386	0.206548	3.00915	3.02735
E20 CRE T0 controle du 130223 C7 - x40-7	2.87704	0.129147	0.0263558	7.7431	0.216679	3.53219	2.98965	2.05747	0.979988	14.7719	0.936596	0.00998889	0.353333	2.25	47.5059	1.1079	0.00154419	0.166759	5.45677	6.04928
E20 CRE T0 controle du 130223 C7 - x40-8	2.67632	0.162722	0.140866	6.14544	0.337095	3.06989	2.99111	2.11702	0.860387	3.18902	0.761281	0.00763333	0.216667	1	32.3136	1.05794	0.00123889	0.392803	4.02227	6.24767
E20 CRE T0 controle du 130223 C7 - x40-9	2.77233	0.145693	0.140716	6.86376	0.303374	3.54286	2.91381	1.84874	0.937135	3.47368	0.776471	0.0103889	0.261667	0.923077	42.1832	1.12115	0.00173115	0.0731272	3.63338	4.29886
E20 CRE T0 controle du 130223 C8 - x40-10	2.47819	0.204414	0.260746	4.89203	0.386492	3.17117	2.2239	1.50202	1.0427	2.14504	0.682039	0.00457778	0.0116667	2	14.1246	1.03734	0.00070502	0.394132	2.51436	2.51579
E20 CRE T0 controle du 130223 C8 - x40-11	2.48436	0.202966	0.179296	4.92694	0.410467	3.06832	2.7012	1.91118	0.972042	3.5977	0.7825	0.00888889	0.171667	0.875	26.5831	1.0826	0.00156839	0.514782	1.87874	4.52213
E20 CRE T0 controle du 130223 C8 - x40-12	3.05307	0.105455	0.147685	9.48268	0.203891	3.98599	1.65261	1.08382	0.930907	5.4	0.84375	0.0199111	0.723333	0.888889	129.209	1.22383	0.00339149	0.188982	1.22139	1.59034
E20 CRE T0 controle du 130223 C8 - x40-13	3.03982	0.107077	0.151697	9.3391	0.324105	5.39823	1.94391	1.26442	1.01532	5.92857	0.85567	0.0150889	0.515	0.580645	107.845	1.17772	0.00249749	0.250184	1.36428	1.82248
E20 CRE T0 controle du 130223 C8 - x40-14	2.69911	0.158507	0.0511222	6.30888	0.27679	2.94652	2.94548	2.03478	0.887734	7.92647	0.887974	0.00674444	0.42	1.16667	28.5269	1.06468	0.00103565	0.493783	2.32121	5.25637
E20 CRE T0 controle du 130223 C8 - x40-15	2.73692	0.151755	0.063903	6.58957	0.220374	2.8631	2.63687	2.13544	0.925546	5.14493	0.837264	0.00471111	0.255	1.8	37.9042	0.99003	0.000575259	0.447741	4.56175	4.91358
E20 CRE T0 controle du 130223 C8 - x40-16	2.11266	0.31137	0.29455	3.21162	0.546779	2.12587	3.15068	2.09996	0.895174	2.34742	0.701262	0.00792222	0.0333333	0	5	1.07266	0.00155603	0.339127	4.49532	6.80326
E20 CRE T0 controle du 130223 C8 - x40-17	2.63103	0.171431	0.26459	5.83325	0.349321	3.40758	1.70554	1.30541	0.988378	3.56226	0.780811	0.0134333	0.27	0.923077	48.0604	1.14581	0.00248486	0.143799	1.45158	1.87876
E20 CRE T0 controle du 130223 C8 - x40-18	2.89018	0.127208	0.130681	7.86113	0.161972	3.50347	1.67288	1.17638	1.10737	3.92857	0.797101	0.0145667	0.51	2.14286	77.7273	1.1745	0.0022183	0.288345	1.00045	1.26879
E20 CRE T0 controle du 130223 C8 - x40-19	2.79333	0.142213	0.0531948	7.03169	0.266225	3.47584	2.68239	2.04566	0.958021	7.375	0.880597	0.0156333	0.526667	2	51.6618	1.19948	0.00263146	0.38449	3.604	7.0925
E20 CRE T0 controle du 130223 C8 - x40-2	3.0551	0.105209	0.0426538	9.50487	0.191201	3.39651	3.50245	3.06243	0.817226	5.78008	0.852509	0.0181556	1.29167	1.04762	105.304	1.23122	0.00288304	0.180099	2.4441	14.6901
E20 CRE T0 controle du 130223 C8 - x40-3	3.0547	0.105258	0.16546	9.50046	0.275756	5.3029	1.8018	1.5283	1.06293	5.05042	0.834722	0.016	0.528333	1.04	120.766	1.19582	0.00257334	0.0790569	1.39364	1.78827
E20 CRE T0 controle du 130223 C8 - x40-4	3.05539	0.105174	0.0457933	9.50803	0.288616	5.81333	1.51026	1.18272	1.13808	22.1692	0.956839	0.0167333	0.755	1.02941	134.963	1.22494	0.00257916	0.63172	1.01518	1.60852
E20 CRE T0 controle du 130223 C8 - x40-5	2.98346	0.114255	0.0903794	8.75237	0.222176	4.18595	1.7903	1.24317	1.01466	5.58025	0.84803	0.0118444	0.633333	1.47059	94.3186	1.15403	0.00169781	0.824689	1.16231	2.02431
E20 CRE T0 controle du 130223 C8 - x40-6	2.4417	0.213185	0.410015	4.69076	0.418367	3.45669	1.87735	1.4512	1.1393	1.65019	0.622669	0.00774444	0.138333	0.727273	29.9447	1.1298	0.00139881	0.267836	2.8909	3.13078
E20 CRE T0 controle du 130223 C8 - x40-7	2.46223	0.208205	0.120713	4.80296	0.34252	2.79856	2.22172	1.52209	0.995595	5.86842	0.854406	0.0058	0.085	1.25	31.2197	1.03233	0.000938319	0.0437688	2.47895	3.52788
E20 CRE T0 controle du 130223 C8 - x40-8	2.84428	0.134112	0.077541	7.45647	0.267247	3.55405	2.96585	2.16249	0.922008	7.73529	0.885522	0.0099	0.581667	0.866667	67.6312	1.10368	0.00151158	0.523306	3.65523	4.23645
E20 CRE T0 controle du 130223 C8 - x40-9	1.95407	0.37374	0.904443	2.67566	0.571956	2.03659	2.08791	1.31577	1.00645	0.812865	0.448387	0.00344444	0.0233333	2	4.86331	0.962238	0.000586315	0.170389	1.61861	2.3179
E20 CRE T0 controle du 130223 C9 - x40-10	2.98776	0.113691	0.110603	8.79578	0.205128	4.09402	2.18952	1.4381	1.02769	4.45665	0.816737	0.0104889	0.378333	1.81818	62.7756	1.13962	0.00152703	0.0650945	1.24327	2.29883
E20 CRE T0 controle du 130223 C9 - x40-11	2.92453	0.122275	0.1618	8.17827	0.22451	3.84706	2.08897	1.22971	0.992773	3.7314	0.788646	0.0127222	0.361667	1.3	46.9945	1.14074	0.00208374	0.132164	1.10227	1.42001
E20 CRE T0 controle du 130223 C9 - x40-12	2.72761	0.153391	0.109564	6.51929	0.272999	3.52404	1.73084	1.35174	1.03457	4.84884	0.829026	0.0111778	0.816667	1.38462	46.0624	1.12118	0.00186996	0.790727	2.59061	4.3824
E20 CRE T0 controle du 130223 C9 - x40-13	2.80637	0.140094	0.103956	7.13805	0.236335	3.18067	2.72028	2.03046	0.916591	3.45274	0.775419	0.00994444	0.456667	1.85714	46.1686	1.12446	0.00149102	0.170441	2.14136	3.853
E20 CRE T0 controle du 130223 C9 - x40-14	3.03645	0.107492	0.161566	9.30298	0.309794	5.14179	1.71572	1.30904	0.993015	7.04608	0.875716	0.0194	0.391667	0.638889	118.133	1.24979	0.00338769	0.311115	1.32393	1.49932
E20 CRE T0 controle du 130223 C9 - x40-2	2.86942	0.130285	0.107359	7.67546	0.268553	3.59438	2.63746	1.51141	0.903658	4.94505	0.831793	0.0120222	0.458333	1	72.25	1.14841	0.00193485	0.4902	2.95949	3.90949
E20 CRE T0 controle du 130223 C9 - x40-3	2.00717	0.351576	0.388483	2.84433	0.60339	1.82031	4.9916	3.42962	0.823885	0.847751	0.458801	0.00593333	0.0166667	2	6.20816	0.988255	0.00109929	0.220656	12.1642	17.7771
E20 CRE T0 controle du 130223 C9 - x40-4	3.01119	0.110665	0.107565	9.03628	0.225712	4.25105	2.02212	1.69867	0.990212	3.83654	0.793241	0.0111778	0.213333	0.941176	86.6779	1.13391	0.00170434	0.20188	5.71988	5.83694
E20 CRE T0 controle du 130223 C9 - x40-5	2.79284	0.142293	0.0874019	7.02774	0.192025	2.82591	2.78872	2.14234	0.917621	2.75598	0.733758	0.00872222	0.731667	3.75	40.6406	1.08728	0.00128954	1.10701	5.82962	10.1842
E20 CRE T0 controle du 130223 C9 - x40-6	2.00469	0.352584	1.21909	2.83621	0.651985	2.5102	1.77474	1.36674	1.09611	0.68375	0.406088	0.0149667	0	0.5	11.7002	1.16279	0.00343228	0.0861621	1.74167	2.72574
E20 CRE T0 controle du 130223 C9 - x40-7	3.18842	0.0902392	0.0524172	11.0817	0.171497	4.93851	2.07502	1.44614	1.07613	7.1129	0.87674	0.0167667	0.915	1.5625	116.741	1.20194	0.00241018	0.499834	3.58079	3.59565
E20 CRE T0 controle du 130223 C9 - x40-8	2.80341	0.140573	0.35284	7.11374	0.263169	3.47471	1.95703	1.37902	0.952145	1.97862	0.664274	0.0139333	0.215	1.44444	68	1.15108	0.00248214	0.126289	1.02233	2.45863
E20 CRE T0 controle du 130223 C9 - x40-9	2.82753	0.136723	0.15297	7.31408	0.328739	4.173	2.12362	1.68161	0.99509	4.05208	0.802062	0.0161667	0.988333	0.65	71.0746	1.21385	0.00294991	0.519053	6.07663	6.32425
E3 mutant NT x40-1-1	2.8167	0.138437	0.274792	7.22349	0.299958	3.86056	2.05713	1.60158	0.975826	1.85259	0.649441	0.0159111	0.105	2.8	47.4194	1.19924	0.00284441	0.134746	1.23088	3.30017
E3 mutant NT x40-1-2	2.90211	0.125472	0.143766	7.96988	0.230754	4.12446	2.04532	1.64217	1.07731	3.39924	0.772688	0.0128556	0.633333	4.2	53.6477	1.14685	0.00197009	0.503231	2.22097	2.22717
E3 mutant NT x40-1-3	2.96348	0.116913	0.105106	8.55336	0.226349	3.42517	3.7355	2.95267	0.841697	1.98916	0.665458	0.0122556	0.76	3.42857	61.8106	1.16043	0.00187786	0.385597	4.55726	10.3662
E3 mutant NT x40-1-4	2.77545	0.145171	0.108046	6.88844	0.245311	3.41877	1.96026	1.50119	1.00205	4.59108	0.821144	0.0167111	1.08333	1.42857	42.834	1.18261	0.00291389	0.52148	1.2859	2.69236
E3 mutant NT x40-1-5	3.03605	0.107543	0.0997132	9.29863	0.215732	4.34884	2.7162	2.28354	1.00693	3.35635	0.77045	0.0175222	0.643333	1.75	85.8675	1.2139	0.00284215	0.0796314	5.75888	5.9982
E3 mutant NT x40-1-6	3.08974	0.101096	0.0764764	9.89155	0.24731	5.06536	1.87451	1.46045	1.02973	9.73626	0.906858	0.0217111	0.906667	1.40909	119.413	1.25248	0.00349946	0.249872	1.3	2.26667
E3 mutant NT x40-1-7	2.51516	0.195896	0.101346	5.10475	0.320192	2.55191	3.12937	2.53311	0.883457	3.7234	0.788288	0.0074	0.243333	1.25	20.6019	1.05599	0.00124232	0.527046	4.94415	10.7097
E3 mutant NT x40-2-1	2.95666	0.117835	0.0473298	8.48645	0.145701	2.90735	3.08676	1.81103	0.897512	3.91935	0.796721	0.0101667	0.416667	16	40.5816	1.12334	0.00147437	0.516398	1.26366	4.84886
E3 mutant NT x40-2-2	2.65146	0.167445	0.220057	5.9721	0.432672	4.08861	1.76669	1.37606	1.0408	4.17284	0.806683	0.0232778	0.665	0.909091	58.3408	1.25713	0.00464294	0.511444	2.83819	2.92907
E3 mutant NT x40-2-3	2.73964	0.151281	0.0609327	6.61021	0.175317	2.525	1.94077	1.55646	0.912292	4.689	0.824222	0.0132111	1.05	1.125	57.3153	1.14126	0.00214076	0.667017	1.76154	4.81649
E3 mutant NT x40-2-4	2.9282	0.121761	0.0937194	8.21284	0.212112	3.7099	1.98001	1.17903	0.980813	6.70166	0.870158	0.0154889	0.69	0.9375	76.69	1.18906	0.0025055	0.401754	1.111	1.40864
E3 mutant NT x40-2-5	2.68841	0.160472	0.310544	6.23161	0.266615	3.25296	1.84818	1.44704	1.01097	1.91597	0.657061	0.0154222	0.128333	2.5	40.0011	1.18198	0.00290635	0.075919	1.0839	3.53653
E3 mutant NT x40-2-6	3.02081	0.109445	0.0667295	9.13698	0.129035	3.01425	2.00803	1.35646	0.918382	4.54152	0.819544	0.0170556	1.07833	4.44444	81.399	1.20913	0.00251219	0.178667	1.61122	2.20723
E3 mutant NTx40-10-1	2.66121	0.165578	0.129967	6.03946	0.229919	2.81116	1.90202	1.56362	0.970732	3.65672	0.785256	0.0104	0.353333	14	28.6054	1.11439	0.00171286	0.103362	1.15225	3.64775
E3 mutant NTx40-10-2	2.85229	0.132881	0.0594269	7.52554	0.232143	3.6696	2.29135	1.44728	1.01205	7.62832	0.884103	0.0108333	0.721667	1.5	41.4397	1.10431	0.00166757	1.16883	1.10662	2.22344
E3 mutant NTx40-10-3	3.03079	0.108196	0.0975033	9.2425	0.208196	4.0807	2.17307	1.43751	0.96763	4.91549	0.830952	0.014	0.565	2.66667	81.4365	1.16287	0.00218858	0.278887	1.0356	3.1067
E3 mutant NTx40-10-4	2.79298	0.142271	0.0575968	7.02884	0.186377	2.95094	2.95686	2.15949	0.972482	4.10363	0.804061	0.0109444	0.448333	1.42857	44.6263	1.12461	0.00170364	0.414214	6.72454	7.86086
E3 mutant NTx40-10-5	2.77547	0.145168	0.0897582	6.88856	0.302981	3.42466	2.78614	2.14699	0.903194	3.88921	0.795468	0.0186333	1.31333	1.23077	44.2646	1.22981	0.00348021	1.09751	4.01014	13.0213
E3 mutant NTx40-10-6	2.67561	0.162854	0.257363	6.14047	0.393103	3.40385	3.25043	2.39266	0.884127	1.74129	0.635209	0.0183667	0.395	0.625	39.2467	1.19272	0.00351276	0.278271	3.46467	5.06911
E3 mutant NTx40-10-7	2.60329	0.176995	0.219389	5.64987	0.293298	2.88144	2.45269	1.54448	0.94171	3.58235	0.781772	0.00865556	0.0533333	1.6	27.3251	1.05697	0.0014659	0.143315	1.04242	2.00847
E3 mutant NTx40-10-8	2.29396	0.252713	0.0659704	3.95706	0.385835	2.08242	4.8931	3.11994	0.847216	5.18644	0.838356	0.00811111	0.25	1.66667	19.0588	1.07802	0.00142865	0.636773	14.8118	18.9247
E3 mutant NTx40-10-9	1.98438	0.360922	0.263546	2.77068	0.665531	2.03311	3.41202	3.04922	0.899479	1.46717	0.594678	0.0108556	0.025	0	1.65404	1.09876	0.00226644	0.647806	9.63418	16.4427
E3 mutant NTx40-11-1	3.0217	0.109334	0.0376001	9.14627	0.152539	3.21921	2.73016	1.61339	0.901187	8.12921	0.890462	0.0180556	1.17667	1.11111	93.0815	1.22098	0.00272523	0.102282	1.78677	2.51845
E3 mutant NTx40-11-10	2.92942	0.121589	0.0513588	8.22441	0.149187	2.90826	2.21717	1.43485	0.915509	6.5461	0.867481	0.0118222	0.646667	4.75	64.5027	1.13451	0.0017024	0.0685511	1.07187	3.5613
E3 mutant NTx40-11-2	2.82626	0.136923	0.291632	7.30338	0.262242	3.6121	1.96932	1.45109	0.965794	2.22222	0.689655	0.0170778	0.623333	0.933333	60.8642	1.19546	0.00317832	0.515852	1.21123	2.16651
E3 mutant NTx40-11-3	2.72458	0.153926	0.152417	6.49662	0.283571	3.35622	2.78214	2.01939	0.970136	2.2117	0.688638	0.0128111	0.681667	1.09091	52.4131	1.16003	0.00219773	0.543031	4.97484	5.44621
E3 mutant NTx40-11-4	2.62185	0.173253	0.23737	5.77191	0.255437	3.11957	1.6653	1.12906	1.06938	2.23868	0.691233	0.00874444	0.498333	2.5	34.5018	1.08233	0.00138775	0.587891	1.39932	1.51411
E3 mutant NTx40-11-5	2.10138	0.31544	0.345122	3.17018	0.542874	2.15	3.86912	2.85434	0.920461	0.948025	0.48666	0.0104111	0.131667	0	6.16009	1.07263	0.00213447	0.380978	11.0146	13.2168
E3 mutant NTx40-11-6	2.47796	0.204469	0.399218	4.89073	0.372748	3.16837	1.89797	1.53133	1.0611	1.52063	0.603274	0.0142556	0.2	3.5	15.0698	1.16916	0.00281317	0.279182	3.00407	3.02319
E3 mutant NTx40-11-7	2.23768	0.269629	0.720334	3.70881	0.483812	2.51701	2.69627	2.07769	0.97569	0.736842	0.424242	0.0088	0.131667	4	12.1905	1.04802	0.0017935	0.150756	4.0127	4.35803
E3 mutant NTx40-11-8	2.5187	0.195099	0.272696	5.1256	0.376376	3.30682	1.716	1.36873	1.05161	3.00781	0.750487	0.0114	0.23	1.6	24.0208	1.13171	0.00211181	0.468293	2.11336	2.15393
E3 mutant NTx40-11-9	2.74707	0.149993	0.113395	6.667	0.262563	3.33624	1.73626	1.12073	0.976587	7.29365	0.879426	0.0116111	0.375	0.692308	44.8411	1.14809	0.00193991	0.218739	1.33165	1.33315
E3 mutant NTx40-3-1	2.78647	0.143341	0.078818	6.97636	0.218224	2.88927	3.27117	2.69414	0.886561	3.50593	0.77807	0.0126667	0.678333	2	38.5851	1.15163	0.00214901	0.374634	5.96253	5.98086
E3 mutant NTx40-3-2	2.66554	0.164754	0.171728	6.06967	0.209784	2.68889	2.27173	1.56284	0.967211	1.97647	0.664032	0.00562222	0.256667	8	20.503	1.00171	0.00083653	0.320573	1.50129	2.49744
E3 mutant NTx40-3-3	2.52161	0.194446	0.0876461	5.14281	0.238565	2.10204	3.63165	2.77024	0.836829	3.07143	0.754386	0.00886667	0.458333	4.5	23.9203	1.11019	0.00143498	0.864215	5.59783	8.18441
E3 mutant NTx40-3-4	2.47249	0.20576	0.396268	4.86004	0.361982	2.64943	2.62739	1.72901	0.906085	1.62271	0.618715	0.00795556	0.213333	1.6	19.5237	1.06029	0.00143639	0.250697	2.65522	3.17961
E3 mutant NTx40-3-5	2.94879	0.118908	0.0938855	8.4099	0.197254	3.4359	2.19522	1.74239	0.919892	4.13095	0.805104	0.0143667	0.705	1.46154	68.4813	1.1624	0.00235562	0.162159	1.77497	4.7484
E3 mutant NTx40-3-6	2.60892	0.175852	0.113318	5.68661	0.28445	2.75377	3.1591	2.55765	0.90797	2.19913	0.687415	0.00821111	0.476667	2	29.2992	1.06571	0.0013571	0.676295	7.17774	15.6466
E3 mutant NTx40-3-7	2.61952	0.173718	0.167606	5.75647	0.328353	3.16754	1.89451	1.65868	0.960275	2.72458	0.731513	0.00976667	0.35	1.28571	29.1897	1.10665	0.00171114	0.769143	3.96323	8.14609
E3 mutant NTx40-3-8	2.36878	0.231855	0.630553	4.31304	0.354235	2.55263	2.04057	1.50107	0.994394	0.664083	0.399068	0.00715556	0.0566667	8	12.642	1.03536	0.00134167	0.212205	3.55663	3.69695
E3 mutant NTx40-3-9	1.96513	0.369012	1.32603	2.70994	0.720081	2.2625	2.37741	1.56184	0.983872	0.49789	0.332394	0.00394444	0.00833333	0	1.66102	0.980728	0.000740043	0.0530745	1.26484	2.48536
E3 mutant NTx40-4-1	2.76655	0.146666	0.416304	6.81823	0.347449	4.14884	1.71765	1.10572	1.03231	2.51031	0.715125	0.0151333	0.371667	0.941176	57.6684	1.18736	0.00280689	0.424126	1.22841	1.27745
E3 mutant NTx40-4-10	2.74154	0.15095	0.475024	6.6247	0.348683	4.01389	1.73162	1.1141	1.02609	2.06982	0.674248	0.0151444	0.388333	1	62.6768	1.18076	0.00280561	0.363403	1.22654	1.27845
E3 mutant NTx40-4-11	2.97522	0.115344	0.0658495	8.6697	0.162535	3.41696	1.99451	1.26743	0.977604	4.38043	0.814141	0.011	0.838333	2.5	68.5174	1.12347	0.001549	1.1913	1.72004	2.07908
E3 mutant NTx40-4-12	2.45588	0.209733	0.103156	4.76797	0.331228	2.52174	3.26585	2.1027	0.918974	4.15179	0.805893	0.00641111	0.186667	2.66667	11.4602	1.04371	0.00107751	0.394942	7.0615	7.98283
E3 mutant NTx40-4-13	2.79242	0.142362	0.175559	7.02436	0.232751	3.50431	1.96564	1.33012	1.03407	3.31579	0.768293	0.0118444	0.381667	4	36.5433	1.14551	0.00193227	0.389833	1.37524	1.689
E3 mutant NTx40-4-14	2.37786	0.229443	0.444264	4.35838	0.489524	2.93836	2.64408	2.13516	0.96359	1.5114	0.601816	0.00856667	0.135	2.33333	10.5603	1.04546	0.00162366	0.180071	4.29106	4.77608
E3 mutant NTx40-4-15	2.4669	0.207088	0.094591	4.82888	0.383195	2.81879	4.10322	2.9491	0.942989	3.23944	0.76412	0.00668889	0.551667	1.125	26.3043	1.02516	0.0010922	1.10119	14.8918	14.9413
E3 mutant NTx40-4-2	2.32416	0.244076	0.321738	4.09709	0.48018	2.80916	3.00456	2.16202	0.989463	1.65289	0.623053	0.00713333	0.103333	1.5	18.0625	1.03623	0.00128402	0.1423	5.89019	7.22394
E3 mutant NTx40-4-3	3.01726	0.109894	0.0486825	9.09964	0.227538	4.3427	2.51918	2.24106	1.00048	5.52557	0.846757	0.0255222	1.94167	1.5	80.6252	1.28934	0.00431785	1.00369	5.5774	6.85635
E3 mutant NTx40-4-4	1.91485	0.391003	1.59235	2.55753	0.714446	2.38542	1.57758	1.30074	1.10347	0.529976	0.346395	0.00708889	0.00666667	1	3.05882	1.09131	0.00147718	0.0395904	1.37892	2.04783
E3 mutant NTx40-4-5	2.79019	0.142728	0.083578	7.00635	0.29697	3.6391	3.74229	2.79006	0.953117	4.16667	0.806452	0.0168778	0.446667	1.08333	56.4645	1.19415	0.00301894	0.252701	9.34668	9.87034
E3 mutant NTx40-4-6	2.83809	0.13507	0.214492	7.40357	0.229696	3.42756	1.91749	1.35403	0.965979	1.83402	0.647145	0.0151778	0.66	0.545455	47.0769	1.19212	0.00267004	0.19132	2.2499	2.80725
E3 mutant NTx40-4-7	2.50524	0.198146	0.0915933	5.04679	0.379611	3.04375	3.84281	3.22033	0.97887	3.04918	0.753036	0.00823333	0.765	0.333333	32.1792	1.0687	0.00139108	1.08044	22.181	22.7706
E3 mutant NTx40-4-8	2.73224	0.152575	0.421309	6.55416	0.31688	3.88235	2.19717	1.6491	1.05228	1.49356	0.598967	0.0129111	0.168333	3.8	31.0474	1.1712	0.00232997	0.149583	2.83028	2.84895
E3 mutant NTx40-4-9	2.71788	0.155119	0.124411	6.44667	0.35634	3.24286	4.07466	3.28705	0.842674	1.89251	0.654279	0.00986667	0.418333	2.5	39.2444	1.1069	0.00164683	0.73598	10.5646	19.6119
E3 mutant NTx40-5-1	2.25181	0.265277	0.394536	3.76965	0.52567	2.65152	2.39108	1.47681	0.970144	2.0354	0.670554	0.00762222	0.0866667	2	7.31304	1.06084	0.0014421	0.275321	2.573	2.74866
E3 mutant NTx40-5-10	2.50928	0.197226	0.285384	5.07032	0.38876	3.19018	2.45371	1.76776	1.00911	2.36145	0.702509	0.0093	0.111667	1	21.3333	1.08574	0.00169929	0.201547	3.53889	3.56028
E3 mutant NTx40-5-11	2.236	0.270149	0.816568	3.70166	0.516854	2.60156	2.50642	1.95116	0.977584	0.861272	0.462733	0.00715556	0.0166667	0.8	28.4027	1.06149	0.00133194	0.0881134	1.47788	2.93097
E3 mutant NTx40-5-12	2.62372	0.172881	0.317681	5.78433	0.310635	2.891	3.61748	2.19161	0.896744	1.58017	0.612429	0.00983333	0.14	2.66667	37.203	1.1084	0.00174039	0.20447	2.9565	4.58001
E3 mutant NTx40-5-13	2.39686	0.22448	0.226869	4.45474	0.34375	2.39429	2.54653	2.10163	0.91671	1.72868	0.633523	0.00782222	0.421667	3	27.13	1.08377	0.00133779	0.539623	1.17244	6.31956
E3 mutant NTx40-5-14	2.63888	0.169888	0.206553	5.88623	0.350469	3.25592	2.56617	1.85588	0.934356	3.12167	0.75738	0.0120444	0.25	1.22222	49.7004	1.14701	0.00209829	0.280024	3.31434	4.27326
E3 mutant NTx40-5-15	2.78422	0.143712	0.300825	6.95834	0.321905	4.07627	1.58144	1.08329	1.03251	3.56757	0.781065	0.0169	0.405	1.06667	56.0303	1.19647	0.00316049	0.46225	1.03564	1.03779
E3 mutant NTx40-5-16	2.79935	0.141231	0.0607293	7.08058	0.196764	2.58763	3.70418	2.71941	0.823873	3.83871	0.793333	0.01	0.63	8.5	35.8543	1.1435	0.00154535	0.495536	1.14789	6.94146
E3 mutant NTx40-5-17	3.0276	0.108594	0.0366618	9.20859	0.167366	3.44164	2.39504	1.68782	0.913564	6.81119	0.871979	0.0124111	1.84833	2.66667	64.6828	1.16289	0.00180185	1.00536	2.47235	4.11237
E3 mutant NTx40-5-18	2.61971	0.17368	0.0573368	5.75771	0.172282	2.16774	3.7084	2.77091	0.907063	2.51948	0.715867	0.00301111	0.0466667	4.5	17.3402	0.89453	0.000340704	0.388962	6.93048	10.6886
E3 mutant NTx40-5-19	3.09226	0.100803	0.0372651	9.92034	0.227169	4.58586	3.80949	2.92564	0.969883	6.77202	0.871333	0.0166667	1.14167	2.41667	87.4093	1.20201	0.00255868	0.365148	13.3799	13.4749
E3 mutant NTx40-5-2	2.14374	0.300425	0.463386	3.32862	0.523659	2.23958	3.75591	2.34363	0.929776	1.22819	0.551205	0.00368889	0.04	0	4.28415	0.922031	0.000638417	0.109764	4.7454	5.19244
E3 mutant NTx40-5-20	2.71287	0.156017	0.130522	6.40956	0.323471	3.45798	3.15594	2.65004	0.948587	2.87021	0.741616	0.0145778	0.435	1.33333	43.6136	1.16037	0.00257492	0.32196	9.16175	10.8485
E3 mutant NTx40-5-21	2.70792	0.156908	0.262966	6.37316	0.33361	4.05696	1.83561	1.30568	1.10211	3.7076	0.787578	0.00894444	0.125	1	41.3943	1.0709	0.00149233	0.301137	1.18565	1.57726
E3 mutant NTx40-5-22	2.76559	0.146828	0.266719	6.81067	0.289838	3.80597	1.63759	1.22673	1.038	3.14876	0.758964	0.0111556	0.203333	1.11111	38.8241	1.11272	0.00193708	0.429259	1.27218	1.29844
E3 mutant NTx40-5-23	2.61912	0.173798	0.12918	5.75381	0.358327	3.36364	2.44179	2.18069	0.976593	3.85204	0.793901	0.0105667	0.266667	0.642857	42.4384	1.15418	0.00182854	0.226991	3.95378	7.24824
E3 mutant NTx40-5-24	2.25097	0.265535	1.028	3.76599	0.604608	3.01449	1.93776	1.62183	1.02943	0.74955	0.428424	0.0107889	0.0266667	0.833333	19.0409	1.13185	0.00228728	0.163635	1.17395	3.25882
E3 mutant NTx40-5-25	2.34947	0.237068	0.830062	4.21821	0.463844	3.14173	2.03449	1.73365	1.09359	0.749386	0.428371	0.00791111	0.07	7	11.8033	1.05376	0.0015232	0.159	3.21513	3.27878
E3 mutant NTx40-5-3	2.86673	0.130689	0.160051	7.65178	0.24658	3.75573	1.73825	1.33274	0.988444	4.46058	0.816869	0.0146222	0.491667	2.8	59.0735	1.17386	0.00237089	0.254145	1.62836	1.63232
E3 mutant NTx40-5-4	2.45961	0.208834	0.491103	4.78849	0.319344	2.6087	2.19004	1.49658	0.964041	1.35897	0.576087	0.0112444	0.115	1.2	32.6655	1.11872	0.00216351	0.0702902	1.79355	2.19109
E3 mutant NTx40-5-5	2.5867	0.180407	0.127345	5.54302	0.358683	3.21809	2.46666	2.18416	0.969384	4.04255	0.801688	0.0105333	0.353333	0.615385	41.2224	1.11148	0.00184072	0.197559	4.04616	7.40116
E3 mutant NTx40-5-6	2.54055	0.190252	0.190344	5.25619	0.261478	2.62687	2.76087	2.19501	0.977347	1.78819	0.641345	0.00892222	0.163333	3.5	19.4175	1.0856	0.00155088	0.176446	8.81407	10.7334
E3 mutant NTx40-5-7	2.53994	0.190385	0.103224	5.25251	0.410986	2.99355	3.35033	2.49739	0.889008	4.85849	0.829308	0.0069	0.156667	2	20.6	1.06574	0.00114798	0.403288	1.41737	7.06642
E3 mutant NTx40-5-8	1.75824	0.468257	1.52709	2.13558	0.779412	2.04545	1.75527	1.47075	1.0849	0.458716	0.314465	0.00353333	0.00333333	0	1.21	0.947953	0.000667049	0.112154	1.06199	2.64525
E3 mutant NTx40-5-9	1.72003	0.489316	2.6337	2.04367	0.925287	2.2807	1.43859	1.04544	1.16016	0.352941	0.26087	0.00357778	0	0	0.0119048	0.94211	0.000698354	0	1.03404	1.16467
E3 mutant NTx40-6-1	2.71675	0.155321	0.172118	6.4383	0.26392	3.01838	2.49667	1.56805	0.912572	3.09494	0.755796	0.0143778	0.473333	1	64.9325	1.16126	0.00251888	0.37811	1.77875	3.09632
E3 mutant NTx40-6-10	2.41948	0.218709	0.29992	4.57229	0.373783	2.54248	2.49972	1.45099	0.909525	2.09677	0.677083	0.0064	0.0216667	2	14.4231	1.04043	0.00109741	0.412479	1.0112	1.89896
E3 mutant NTx40-6-11	2.11785	0.309512	0.837979	3.23089	0.628358	2.52688	2.35898	1.71182	0.986642	0.904977	0.475059	0.00467778	0.00333333	0	5.78	1.01183	0.000861632	0.137849	1.59368	3.20964
E3 mutant NTx40-6-12	2.8294	0.136428	0.0774175	7.32987	0.217937	2.82958	4.62661	3.33129	0.826916	2.17729	0.685266	0.0127444	0.428333	1.33333	51.9135	1.15825	0.00210381	0.147635	15.0474	22.4017
E3 mutant NTx40-6-13	2.04481	0.336667	0.49229	2.97029	0.635165	2.13095	4.04658	2.77691	0.900184	0.965986	0.491349	0.00321111	0.0216667	0	2.54225	0.952339	0.000543827	0.316774	4.09107	7.82105
E3 mutant NTx40-6-2	2.79656	0.141685	0.0973388	7.05792	0.239323	3.28125	3.4497	3.01979	0.95032	2.12681	0.680185	0.00958889	0.373333	1.28571	48.6559	1.10783	0.00154071	0.247818	11.0522	11.9097
E3 mutant NTx40-6-3	2.99044	0.11334	0.0545143	8.82302	0.176319	3.45631	2.8187	2.02603	0.932923	5.85882	0.854202	0.0129556	0.983333	2.22222	78.1536	1.14942	0.00195486	0.505544	3.82611	4.58057
E3 mutant NTx40-6-4	2.76484	0.146955	0.0925349	6.80482	0.240791	3.10277	2.95638	1.88097	0.929206	3.52564	0.779037	0.0117667	0.358333	1.6	41.0376	1.13736	0.00189938	0.316377	2.83252	4.86403
E3 mutant NTx40-6-5	2.04879	0.335127	0.517575	2.98394	0.49236	1.92593	3.48566	2.09018	0.919831	1.14286	0.533333	0.00966667	0.0616667	0	10.2608	1.08246	0.00195832	0.135613	4.45335	4.49267
E3 mutant NTx40-6-6	3.07945	0.102301	0.0899951	9.77506	0.184113	4.18904	1.9288	1.46426	0.99874	5.42574	0.844376	0.0216333	2.11333	1.71429	76.2263	1.23822	0.00366409	0.628464	1.31674	1.5104
E3 mutant NTx40-6-7	2.64263	0.169157	0.362068	5.91169	0.284252	3.0119	2.35794	1.7971	0.955605	1.80288	0.643225	0.00647778	0.133333	4.5	28.8427	1.03773	0.00104338	0.0926085	1.93786	2.01124
E3 mutant NTx40-6-8	2.84631	0.133799	0.16913	7.47392	0.24447	3.90498	2.27512	1.69898	1.05671	2.98872	0.749293	0.0117889	0.315	1	61.9925	1.14588	0.00192299	0.32052	3.51884	3.84998
E3 mutant NTx40-6-9	2.39944	0.223813	0.122737	4.46801	0.304515	2.18605	3.93266	2.98697	0.886626	1.64167	0.621451	0.00352222	0.143333	2	13.203	0.943137	0.000508574	0.635441	12.2215	13.2813
E3 mutant NTx40-7-1	2.59207	0.179296	0.116399	5.57736	0.267498	2.72381	2.95181	1.88199	0.944253	2.65502	0.726404	0.0093	0.0816667	4	22.1316	1.07334	0.0015563	0.15458	5.72559	6.26466
E3 mutant NTx40-7-10	2.43253	0.215448	0.182882	4.6415	0.334403	2.6028	2.7495	2.08499	0.969724	2.4209	0.707679	0.0127333	0.125	1.125	31.1726	1.13796	0.0023657	0.121796	6.00497	8.59918
E3 mutant NTx40-7-11	3.04325	0.106654	0.0556762	9.37609	0.247287	4.62449	2.17304	1.92341	0.99184	7.73684	0.885542	0.0129111	0.695	2.26667	81.1672	1.17526	0.00186156	0.488244	3.50045	3.52331
E3 mutant NTx40-7-12	1.92198	0.387808	0.589912	2.57859	0.712121	2.11236	2.70654	2.12292	0.970752	1.01429	0.503546	0.0047	0.00666667	2	1.20188	1.01265	0.000887022	0.353971	3.83052	7.90051
E3 mutant NTx40-7-2	2.1577	0.295636	0.17506	3.38254	0.447751	1.88272	4.60487	3.32746	0.831809	1.50775	0.601236	0.00718889	0.035	0	10.2031	1.04947	0.00126006	0.712008	6.90155	18.9276
E3 mutant NTx40-7-3	2.57924	0.181964	0.128851	5.4956	0.206019	2.42512	2.59917	1.76435	0.97222	2.79429	0.736446	0.00737778	0.173333	3.33333	26.5767	1.05064	0.0011547	0.399548	2.84779	4.8288
E3 mutant NTx40-7-4	2.72866	0.153206	0.172326	6.52717	0.31115	3.46465	2.02106	1.27778	0.951588	3.48469	0.777019	0.00976667	0.54	1.61538	40.8331	1.12108	0.00158384	0.740507	1.76368	2.36119
E3 mutant NTx40-7-5	2.91826	0.123162	0.120058	8.11939	0.228775	3.3879	2.91531	2.30091	0.872375	3.61603	0.783364	0.0121556	0.476667	2.125	61.727	1.14761	0.00199927	0.303845	4.88629	5.3641
E3 mutant NTx40-7-6	2.47221	0.205825	0.320739	4.85849	0.375067	3.01987	2.62988	1.90459	1.01492	1.40893	0.584879	0.00778889	0.105	3.5	16.0024	1.05514	0.00134117	0.253365	4.53065	4.59407
E3 mutant NTx40-7-7	2.70004	0.158338	0.0665578	6.31559	0.289093	2.92857	3.17862	2.68527	0.862428	4.37818	0.814064	0.0164333	0.546667	1.6	43.5556	1.19762	0.00296548	1.14677	1.21142	15.0825
E3 mutant NTx40-7-8	2.80429	0.14043	0.130527	7.12099	0.209616	3.55133	1.78141	1.42239	1.08928	4.90086	0.830533	0.0152111	0.36	6	48.5708	1.17852	0.00263586	0.328798	2.41837	3.01942
E3 mutant NTx40-7-9	2.72001	0.154739	0.126821	6.46248	0.210114	3.26512	1.67226	1.41318	1.10223	3.81538	0.792332	0.0104333	0.29	14	23.4194	1.11751	0.00169033	0.656742	1.88492	2.46194
E3 mutant NTx40-8-1	2.83251	0.135941	0.119559	7.35612	0.229984	3.52091	2.38606	1.62699	0.998064	4.32068	0.812054	0.0140111	0.395	4.2	37.1338	1.1619	0.00231287	0.377815	1.00332	1.92102
E3 mutant NTx40-8-2	2.60073	0.177518	0.182746	5.63324	0.286024	2.89076	2.18625	1.79181	0.959516	1.9675	0.663016	0.0131889	0.328333	1.77778	30.5273	1.15815	0.00240058	0.298832	3.52749	7.52772
E3 mutant NTx40-8-3	2.76728	0.146543	0.0759792	6.82396	0.261955	3.35955	2.3411	1.83775	0.961905	4.97826	0.832727	0.0152778	0.51	1.3	44.214	1.16587	0.00271923	0.350584	1.46049	6.39953
E3 mutant NTx40-8-4	2.83206	0.136012	0.13438	7.3523	0.210602	3.30314	1.86318	1.36092	0.978976	3.08333	0.755102	0.0147	0.463333	2.25	41.6577	1.17296	0.00250892	0.200151	1.49908	3.12577
E3 mutant NTx40-8-5	2.90216	0.125466	0.0948329	7.97031	0.24482	3.94553	1.75491	1.50278	1.00047	6.6213	0.868789	0.0143111	0.675	2.85714	40.1644	1.1584	0.00237049	0.512272	2.37287	2.45748
E3 mutant NTx40-8-6	2.85117	0.133051	0.268421	7.51592	0.311574	4.19626	2.06467	1.29874	1.00023	2.41141	0.706866	0.0126222	0.311667	1.5	45.9078	1.16419	0.00214053	0.390242	1.61685	1.72526
E3 mutant NTx40-8-7	2.74562	0.150242	0.0697915	6.65591	0.250313	2.81724	4.32306	2.85244	0.846008	3.22183	0.763136	0.0133222	0.606667	5.33333	30.1158	1.15633	0.00222932	0.514186	12.2997	12.9656
E3 mutant NTx40-8-8	2.53188	0.192162	0.32598	5.20395	0.353855	3.08019	2.39809	1.80692	0.995021	2.84356	0.739824	0.0139222	0.215	1.2	31.1758	1.16246	0.00272925	0.322104	1.10889	2.03451
E3 mutant NTx40-8-9	3.05523	0.105193	0.169916	9.50631	0.257231	5.04096	1.76603	1.25503	1.04554	4.42655	0.815721	0.0213444	0.643333	2.42857	82.7058	1.24384	0.00360796	0.183947	1.27601	1.73316
E3 mutant NTx40-9-1	2.53206	0.192121	0.0546606	5.20504	0.266339	1.98438	5.59008	3.6152	0.738724	2.22553	0.689974	0.00842222	0.32	4	23.1358	1.09895	0.00137416	1.12656	3.56865	18.4219
E3 mutant NTx40-9-10	2.2144	0.276951	0.320928	3.61075	0.561629	2.59292	2.58933	1.69258	0.958225	2.13772	0.681298	0.00582222	0.0416667	0.666667	8.47339	1.01605	0.00106973	0.390732	2.00907	5.42316
E3 mutant NTx40-9-11	2.3914	0.225895	0.927159	4.42684	0.524116	3.24638	2.20979	1.56684	1.01296	0.745182	0.426994	0.00905556	0.0583333	2.5	15.3132	1.07573	0.0017708	0.178611	2.29072	2.30102
E3 mutant NTx40-9-2	2.20241	0.280803	0.838515	3.56121	0.622291	2.87037	2.23753	1.82947	1.02175	0.643052	0.391376	0.0067	0.0316667	0	5.49153	1.08427	0.00129892	0.293659	3.7178	3.73738
E3 mutant NTx40-9-3	2.39524	0.224898	0.133948	4.44647	0.383369	2.34637	3.25825	2.72925	0.852261	2.42995	0.708451	0.00788889	0.0733333	1.5	15.0477	1.04224	0.00136804	0.135314	2.28688	21.6763
E3 mutant NTx40-9-4	2.5442	0.189454	0.0947357	5.27834	0.151733	1.87132	2.53406	1.54276	0.910149	2.04527	0.671622	0.00822222	0.366667	3.33333	29.4588	1.0652	0.00128118	0.519875	11.1995	11.3124
E3 mutant NTx40-9-5	2.69241	0.159736	0.0691154	6.26035	0.2843	2.63	6.33788	5.19903	0.787895	1.78414	0.640823	0.0140444	1.19	8.5	20.2272	1.16645	0.00253284	1.0192	48.3574	52.7682
E3 mutant NTx40-9-6	2.24838	0.266327	0.441081	3.75478	0.442124	2.4	2.84056	2.09276	0.961291	0.968992	0.492126	0.00564444	0.07	2	14.884	1.01073	0.00100259	0.0992095	6.42617	6.43161
E3 mutant NTx40-9-7	2.29668	0.251922	0.126604	3.96948	0.485437	2.4875	3.8918	2.74062	0.899422	3.7619	0.79	0.00888889	0.178333	1.5	18.7991	1.07324	0.00165736	0.459619	12.7455	16.047
E3 mutant NTx40-9-8	2.70774	0.156941	0.0743254	6.37184	0.225693	2.46275	3.94888	3.09509	0.81357	3.06842	0.754204	0.00858889	0.431667	4.66667	42.8199	1.08785	0.00128788	0.209725	9.35663	10.7041
E3 mutant NTx40-9-9	1.4871	0.639814	2.61221	1.56295	0.928832	1.62338	1.30358	1.09545	1.07772	0.322078	0.243615	0.00565556	0	0	0.395161	1.03746	0.00119887	0	1.2715	1.28364
E4 WT NTx40-1-1	2.88186	0.128432	0.0716206	7.78621	0.206314	3.0363	2.86422	2.52627	0.858529	4.2654	0.810081	0.0123444	0.405	3.33333	60.3211	1.19333	0.00188351	0.174937	1.32065	7.2681
E4 WT NTx40-1-10	1.85923	0.416858	0.896312	2.3989	0.737981	1.93506	3.17648	1.81646	0.93899	0.705556	0.413681	0.00341111	0.00666667	0	2.55118	0.952364	0.0006114	0.20578	2.14526	3.74246
E4 WT NTx40-1-11	2.2194	0.275362	0.267557	3.63159	0.459898	2.53704	2.53945	1.66056	1.03015	2.08163	0.675497	0.00503333	0.0816667	0.75	10.6176	1.03805	0.000866655	0.567711	3.37342	5.43174
E4 WT NTx40-1-2	2.58588	0.180578	0.125278	5.53779	0.345238	3.17257	1.66782	1.34196	0.975023	5.14747	0.837331	0.0148222	1.12833	0.333333	48.1862	1.15446	0.00286256	0.798236	3.04023	4.54559
E4 WT NTx40-1-3	2.86117	0.131528	0.12894	7.60295	0.191145	3.41923	1.54297	1.20236	1.02864	3.12121	0.757353	0.0120889	0.895	3	51.5	1.13407	0.00190624	0.750612	1.63229	1.68036
E4 WT NTx40-1-4	2.33222	0.241821	0.35953	4.13529	0.392327	2.3945	3.08815	2.02433	0.924451	1.05844	0.514196	0.00352222	0.035	2	10.3129	0.976016	0.000549767	0.168497	2.55217	6.04318
E4 WT NTx40-1-5	2.97231	0.115731	0.08246	8.64073	0.178177	3.40484	2.45388	1.84757	0.933515	3.77778	0.790698	0.0114667	0.613333	2.57143	67.1029	1.14357	0.00171124	0.537364	2.82039	5.29152
E4 WT NTx40-1-6	2.75616	0.148431	0.197988	6.73714	0.155604	2.48797	1.61251	1.05482	0.936179	2.06333	0.673558	0.0102111	0.363333	4.5	29.0081	1.08872	0.00175655	0.257636	3.92218	3.95551
E4 WT NTx40-1-7	2.10888	0.312726	0.66593	3.19769	0.662589	2.44915	2.68462	2.35379	0.94093	1.13816	0.532308	0.00722222	0.02	0	12.974	1.05243	0.00144428	0.0877058	5.4331	5.60321
E4 WT NTx40-1-8	2.13775	0.302504	0.626874	3.30574	0.492659	2	3.37165	2.7482	0.861961	1	0.5	0.00671111	0.0166667	1	18.1325	1.04875	0.00127871	0.0406894	1.97457	4.19678
E4 WT NTx40-1-9	2.52353	0.194017	0.0826091	5.1542	0.429854	3.23645	2.04982	1.56642	0.95774	11.5534	0.92034	0.0143667	0.461667	0.692308	35.6605	1.16679	0.00273407	0.365783	1.17757	3.07304
E4 WT NTx40-2-1	2.97309	0.115627	0.0458789	8.64851	0.136108	3.05278	2.18614	1.79711	0.956779	5.9837	0.856809	0.0142778	0.701667	2.08333	65.723	1.16753	0.00218121	0.318068	1.0112	4.75353
E4 WT NTx40-2-2	2.60258	0.177138	0.334413	5.6453	0.322951	3.20588	1.99601	1.64371	0.999291	1.68342	0.627341	0.0118667	0.0566667	1.5	22.5806	1.13013	0.002172	0.246701	2.398	2.76893
E4 WT NTx40-2-3	2.94422	0.119536	0.154087	8.36571	0.217623	3.65591	2.27812	1.42479	0.936786	3.92917	0.797126	0.0131444	0.766667	2.125	54.1633	1.16001	0.00206907	0.741249	1.0998	1.28827
E4 WT NTx40-2-4	2.63515	0.17062	0.181434	5.86098	0.311432	2.93122	3.29986	1.96129	0.896182	2.18834	0.686357	0.0079	0.123333	0.333333	28.5328	1.05968	0.00129443	0.262521	3.58649	4.44558
E4 WT NTx40-2-5	3.00371	0.111622	0.0685389	8.95877	0.21515	3.72296	2.57585	2.21392	0.895919	5.16875	0.837893	0.0219333	1.68167	2.33333	88.6874	1.25858	0.00369102	0.715298	2.71692	9.17362
E4 WT NTx40-2-6	2.74623	0.150137	0.049533	6.66057	0.202184	2.88136	2.70859	1.7607	0.962082	7.30769	0.87963	0.0144	0.538333	3.2	55.264	1.16706	0.00233492	0.216951	3.45468	3.82788
E4 WT NTx40-2-7	2.23488	0.270499	0.390947	3.69687	0.595238	2.37607	4.21256	2.63229	0.833067	0.965066	0.491111	0.005	0.065	2	8.76018	1.03558	0.000876692	0.434613	2.06996	9.71477
E4 WT NTx40-2-8	2.71798	0.155102	0.0331657	6.44738	0.190912	2.51653	4.41698	3.62901	0.893311	3.46541	0.776056	0.00788889	0.441667	10	24.8439	1.06049	0.00115687	0.892062	17.008	17.0686
E4 WT NTx40-3-1	2.61768	0.174086	0.11743	5.74427	0.238488	2.84416	1.84508	1.27696	1.01388	4.00481	0.800192	0.0115667	0.488333	1.16667	38.4646	1.1073	0.00187457	0.887527	1.0366	2.27269
E4 WT NTx40-3-2	2.88522	0.127937	0.0693634	7.81637	0.21539	3.22314	2.73701	2.44204	0.888507	4.40303	0.814919	0.0198111	1.39667	1.23529	91.1879	1.22503	0.00336271	0.502378	1.21117	11.9197
E4 WT NTx40-3-3	2.18634	0.286047	0.697425	3.49593	0.55876	2.82787	2.00687	1.51498	1.08214	1.14088	0.532903	0.00861111	0.0483333	0	8.42857	1.08823	0.00167964	0.375027	1.24576	2.18423
E4 WT NTx40-3-4	2.33492	0.24107	0.19959	4.14817	0.458481	2.5188	4.29069	3.29519	0.896761	1.44811	0.591522	0.00576667	0.301667	3.5	9.49837	0.991725	0.000967445	0.623867	21.882	22.3874
E4 WT NTx40-3-5	2.99124	0.113237	0.0599802	8.83107	0.173746	3.49201	2.59922	1.65467	0.948649	5.55376	0.847416	0.0135444	1.25333	2.44444	57.6341	1.1609	0.00202466	0.861633	1.5479	2.30862
E4 WT NTx40-3-6	3.06802	0.103656	0.0525654	9.64728	0.145205	3.77717	1.59569	1.33263	1.02747	9.01212	0.900121	0.0183556	1.17167	3.5	73.2347	1.21581	0.00270885	0.403526	1.20155	1.66241
E4 WT NTx40-4-1	2.92086	0.122794	0.0470873	8.14373	0.111073	2.67665	2.34091	1.91247	0.986199	3.09829	0.755996	0.0106556	0.681667	8	50.8469	1.13061	0.00150409	0.548959	4.89567	6.68285
E4 WT NTx40-4-2	2.93929	0.120215	0.0900849	8.31842	0.18115	3.26246	3.0547	2.09201	0.921478	2.97491	0.748422	0.0123222	0.826667	1.72727	76.5108	1.16482	0.00185333	0.242098	2.50216	6.69905
E4 WT NTx40-4-3	2.77349	0.145498	0.0626496	6.87294	0.202407	3.10042	2.4592	1.97132	1.00269	4.96774	0.832432	0.0102778	0.693333	2	40.2286	1.11878	0.0016431	0.585408	11.461	12.0455
E4 WT NTx40-4-4	2.44289	0.212893	0.548889	4.6972	0.346197	3.07853	1.82615	1.33647	1.11389	1.30074	0.565357	0.0138556	0.0633333	1.14286	22.878	1.16968	0.00277466	0.0800962	2.4095	2.47251
E4 WT NTx40-4-5	2.75055	0.149392	0.147116	6.69378	0.228523	3.1055	2.25733	1.59557	0.9705	2.11877	0.679361	0.00904444	0.778333	4	39.0759	1.07119	0.00141235	0.709708	2.86996	4.25191
E4 WT NTx40-4-6	2.0731	0.325879	0.39483	3.06862	0.541234	2.2029	3.84371	3.04084	0.975796	0.918919	0.478873	0.00867778	0.065	0.4	12.3636	1.06529	0.00168709	0.182457	11.233	11.4737
E4 WT NTx40-5-1	2.96237	0.117063	0.0436656	8.5424	0.130279	3.04942	2.28667	1.49728	0.989008	5.21762	0.839167	0.0133333	1.49833	2.85714	77.2999	1.15917	0.00187796	0.612372	1.30743	2.00158
E4 WT NTx40-5-2	2.84149	0.134543	0.0904577	7.43255	0.212401	3.16604	2.88127	2.2227	0.924273	3.48673	0.77712	0.0112667	0.471667	2.5	45.8122	1.13908	0.00180588	0.0702208	2.00594	7.48797
E4 WT NTx40-5-3	2.94173	0.119878	0.102537	8.34183	0.26183	3.93985	2.56421	1.68266	0.923014	4.95261	0.832006	0.0139556	0.488333	1.72727	62.7139	1.15876	0.00232626	0.0798087	4.14556	4.45778
E4 WT NTx40-5-4	2.86739	0.13059	0.131657	7.65755	0.147617	2.72973	1.96358	1.31258	0.927815	3.19905	0.761851	0.00984444	0.395	2.6	55.1837	1.09349	0.00147087	0.237557	1.52053	1.74947
E4 WT NTx40-5-5	2.87428	0.129558	0.0794785	7.71858	0.17843	3.21687	1.97519	1.53595	0.986647	4.16265	0.806301	0.00952222	0.441667	16	37.9797	1.11058	0.00141132	0.615816	1.36171	2.72031
E4 WT NTx40-6-1	2.74618	0.150146	0.0873141	6.66018	0.192507	2.85714	2.36593	1.73668	0.977739	3.00862	0.750538	0.0103333	0.425	3.33333	31.8066	1.09413	0.00164467	0.491869	1.18957	4.02787
E4 WT NTx40-6-2	2.59649	0.178385	0.339781	5.60584	0.404692	3.625	2.10421	1.52644	1.01649	2.45	0.710145	0.00766667	0.155	2.33333	23.3653	1.09115	0.00133676	0.240772	1.70382	2.93908
E4 WT NTx40-6-3	2.8408	0.13465	0.241529	7.42666	0.263766	3.75	1.72838	1.24856	0.98317	3.63208	0.784114	0.0109111	0.235	1.71429	50.4013	1.12906	0.00180873	0.115058	1.29343	1.40422
E4 WT NTx40-6-4	2.77615	0.145054	0.132073	6.89397	0.265417	3.78857	2.01105	1.6051	1.0667	2.79381	0.736413	0.00817778	0.173333	2.25	41.5129	1.0772	0.00126871	0.738131	1.45431	5.73545
E4 WT NTx40-6-5	2.7184	0.155026	0.114549	6.45054	0.178421	2.71681	1.70961	1.39838	0.997105	2.93989	0.746186	0.00801111	0.301667	2	39.0799	1.08171	0.0012293	0.485576	2.72703	2.78475
E4 WT NTx40-6-6	2.79112	0.142575	0.0519107	7.01386	0.207558	3.43933	1.84125	1.21092	1.07633	9.61165	0.905764	0.0121444	0.808333	2.83333	50.2313	1.13855	0.00185955	0.623569	1.22097	1.45068
E4 WT NTx40-7-1	3.0735	0.103005	0.0488312	9.70829	0.18553	4.26994	2.04233	1.42774	1.02111	10.1293	0.910147	0.0181778	1.40333	1.05556	84.1612	1.20861	0.00283919	0.602054	1.46806	1.73997
E4 WT NTx40-7-2	2.88987	0.127254	0.0743819	7.85829	0.199216	3.27609	2.48625	1.57124	0.934041	5.13065	0.836885	0.0135556	0.555	2.5	44.0196	1.14982	0.00217647	0.589526	2.34184	2.9131
E4 WT NTx40-7-3	3.08503	0.101646	0.0262125	9.83805	0.147589	3.5237	2.31312	1.80801	0.932315	8.32308	0.892739	0.0202	2.46333	1.38462	114.987	1.23845	0.00297657	0.956996	1.23593	6.00698
E4 WT NTx40-7-4	3.01786	0.109818	0.0819769	9.10598	0.268334	4.47866	2.18244	1.85128	0.949475	7.15354	0.877354	0.0230111	0.823333	1.47368	92.5151	1.25707	0.00397472	0.376135	1.79817	4.16943
E4 WT NTx40-7-5	2.60336	0.176981	0.547092	5.65032	0.294212	2.77617	2.09879	1.14158	0.905824	1.35463	0.575305	0.0163778	0.201667	2.25	31.3314	1.18873	0.00327083	0.0781398	1.57914	1.58163
E4 WT NTx40-8-1	2.71875	0.154963	0.168684	6.45315	0.323203	3.43348	2.48634	2.1805	0.93589	1.72991	0.633688	0.0135889	0.325	1.36364	52.1303	1.16127	0.00230338	0.833674	2.0628	10.6306
E4 WT NTx40-8-2	2.8448	0.134031	0.0730069	7.46098	0.198876	3.10638	2.95819	2.5469	0.933615	3.33597	0.769371	0.0121889	0.253333	2.75	29.205	1.14394	0.00192338	0.445784	7.33574	8.33979
E4 WT NTx40-8-3	2.80387	0.140498	0.192506	7.11755	0.231973	3.37657	2.00261	1.28489	0.984978	3.94203	0.797654	0.0113667	0.355	2.28571	48.5306	1.1147	0.00191616	0.25782	1.51425	1.86225
E4 WT NTx40-8-4	2.3938	0.225272	0.314986	4.43908	0.459785	2.75325	2.49447	1.61203	0.914693	2.21239	0.688705	0.00806667	0.0466667	2	12.482	1.05664	0.00144737	0.148454	3.53866	3.59711
E4 WT NTx40-8-5	2.50693	0.197762	0.21487	5.0566	0.346591	2.89655	1.88615	1.1249	0.973004	4.13084	0.8051	0.0061	0.108333	2	18.3258	1.04092	0.00098119	0.428918	1.33729	1.35773
E4 WT NTx40-8-6	2.47843	0.204356	0.320926	4.89342	0.423906	3.20423	2.07076	1.29881	1.00572	2.47475	0.712209	0.00764444	0.205	1	31.3796	1.08169	0.00128512	0.648119	1.91403	1.9245
E4 WT NTx40-8-7	2.59641	0.178402	0.264035	5.60531	0.191238	2.31841	1.8616	1.31836	0.945809	1.61905	0.618182	0.00611111	0.186667	3.33333	30.0029	1.02133	0.000950151	0.307482	1.40483	1.75244
E4 WT NTx40-9-1	2.84772	0.133581	0.101777	7.48611	0.218966	3.28049	2.48799	1.84296	0.936469	3.80702	0.791971	0.0182667	0.7	1.44444	67.2934	1.21022	0.00307881	0.232672	2.67476	3.32464
E4 WT NTx40-9-2	2.34028	0.239587	0.68042	4.17385	0.469027	2.7697	2.2312	1.43332	0.968939	0.995816	0.498952	0.0106	0.07	0.75	13.7836	1.10799	0.00215168	0.194257	1.41687	2.95647
E4 WT NTx40-9-3	2.23135	0.271599	0.20594	3.6819	0.46875	2.09884	3.80591	2.58363	0.8326	2.31169	0.698039	0.0085	0.165	1	17.985	1.09219	0.00155251	0.184355	3.15551	7.56802
E4 WT NTx40-9-4	2.16517	0.293102	0.197922	3.41178	0.46026	2.48276	2.53988	1.83151	1.07264	3.28019	0.766366	0.00984444	0.111667	0.25	13.8571	1.11635	0.00188747	0.309737	4.16673	4.93631
E4 WT NTx40-9-5	2.29613	0.25208	0.0936951	3.967	0.353799	1.82569	5.74946	3.82544	0.773725	2.51316	0.715356	0.0089	0.183333	2	13.8237	1.07029	0.00153453	0.145683	14.2569	20
E4 WT NTx40-9-6	2.64591	0.16852	0.134568	5.934	0.276843	2.88561	2.98041	1.80545	0.924215	4.88085	0.829957	0.0153556	0.398333	1.83333	33.8352	1.1665	0.00279005	0.270338	1.15954	1.90762
E7 WT T0 controle du 031023 C1 - x40-2	2.68796	0.160555	0.139093	6.22838	0.30983	3.43478	1.74112	1.43577	0.990746	4.72928	0.825458	0.0115222	0.301667	0.875	33.3657	1.13479	0.00203181	0.175665	2.14519	3.44836
E7 WT T0 controle du 031023 C1 - x40-3	2.95475	0.118094	0.112583	8.4678	0.182323	3.90393	1.57098	1.23008	1.07972	5.03401	0.834273	0.00985556	0.59	2.8	66.6	1.11212	0.00136732	0.546589	1.0524	1.41529
E7 WT T0 controle du 031023 C1 - x40-4	2.42879	0.216377	0.170783	4.62156	0.428901	2.88806	2.8577	2.25052	0.954199	2.875	0.741935	0.0062	0.191667	1.75	18.2826	1.04359	0.00101935	0.538816	7.31786	8.00562
E7 WT T0 controle du 031023 C1 - x40-5	3.03428	0.107762	0.0447702	9.27973	0.264872	5.29493	1.85655	1.56969	1.10868	12.8636	0.927869	0.0135556	0.636667	1.05	78.4488	1.19364	0.00202186	0.466061	2.69537	3.1049
E7 WT T0 controle du 031023 C1 - x40-6	2.83187	0.136041	0.217419	7.35073	0.365266	4.82353	1.81996	1.24161	1.08575	4.57031	0.820477	0.0158444	0.405	0.863636	69.4231	1.20103	0.00288224	0.301934	1.55561	2.01022
E7 WT T0 controle du 031023 C1 - x40-7	3.10571	0.0992544	0.0733819	10.0751	0.24399	5.28839	2.01961	1.39486	1.06264	9.01923	0.900192	0.0173667	0.571667	2.14286	77.3987	1.22842	0.00278469	0.128975	1.14281	2.12108
E7 WT T0 controle du 031023 C1 - x40-8	2.92142	0.122714	0.218377	8.14904	0.350978	5.4837	1.56329	1.29953	1.13587	4.57078	0.820492	0.0135556	0.253333	1.2	72.8272	1.15715	0.00228214	0.118044	1.8812	2.10546
E7 WT T0 controle du 031023 C1 - x40-9	2.21278	0.277469	0.305357	3.604	0.543949	2.42202	3.1117	2.61425	0.911199	2.23485	0.690867	0.00474444	0.0166667	2	6.2678	0.982901	0.000825101	0.153033	3.75132	7.18053
E7 WT T0 controle du 031023 C10 - x40-1	2.68479	0.161142	0.250691	6.20571	0.392468	3.45989	3.27469	2.44513	0.889957	2.11151	0.678613	0.00961111	0.166667	0.833333	44.7087	1.09684	0.00168881	0.102003	3.17559	5.23655
E7 WT T0 controle du 031023 C10 - x40-10	2.55964	0.186116	0.209299	5.37299	0.452895	3.60331	2.03411	1.87555	0.996521	3.47863	0.776718	0.00582222	0.24	1.75	19.9017	1.02295	0.000948815	0.218426	1.34372	4.91981
E7 WT T0 controle du 031023 C10 - x40-11	2.2866	0.254863	0.81629	3.92368	0.504692	2.94231	1.76401	1.3928	1.05556	1.30476	0.566116	0.00537778	0.0133333	0.833333	18.9197	1.00023	0.000958099	0.25713	1.36658	1.65283
E7 WT T0 controle du 031023 C10 - x40-12	2.42527	0.217254	0.439832	4.6029	0.456461	3.328	1.75557	1.31566	1.07016	2.02326	0.669231	0.00722222	0.101667	0.8	15.4575	1.07182	0.00129688	0.313786	1.21091	2.36503
E7 WT T0 controle du 031023 C10 - x40-13	2.64618	0.168466	0.270046	5.93591	0.370819	3.70701	1.87315	1.37309	1.02555	3.15761	0.759477	0.0085	0.211667	1.55556	33.7349	1.10771	0.001459	0.219923	2.3432	2.48754
E7 WT T0 controle du 031023 C10 - x40-14	2.59163	0.179386	0.118205	5.57456	0.37271	3.55556	1.93825	1.37161	1.04475	6.76316	0.871186	0.00655556	0.148333	2	29.9144	1.02702	0.00106738	0.388391	2.95308	2.96095
E7 WT T0 controle du 031023 C10 - x40-15	2.8262	0.136932	0.0634808	7.30289	0.316288	3.50612	3.46393	2.5465	0.853672	4.47761	0.817439	0.0122333	0.856667	1.1	49.9378	1.13963	0.00207617	0.549957	7.77171	14.1713
E7 WT T0 controle du 031023 C10 - x40-16	2.81083	0.139376	0.403888	7.17483	0.438424	5.14141	1.669	1.29435	1.08224	2.24949	0.69226	0.0178	0.243333	0.666667	66.2227	1.21473	0.00353935	0.190275	1.00645	2.53455
E7 WT T0 controle du 031023 C10 - x40-2	2.6057	0.176503	0.445479	5.66561	0.452446	3.79793	2.09253	1.6618	0.99659	1.79245	0.641892	0.0148	0.133333	0.833333	43.5661	1.19622	0.00299655	0.0547997	3.61218	3.61327
E7 WT T0 controle du 031023 C10 - x40-3	2.64215	0.16925	0.248126	5.90841	0.361171	3.48421	2.23389	1.57927	0.981245	3.17992	0.760761	0.0111	0.193333	0.9	36.2579	1.13134	0.00195361	0.0707461	2.3832	2.80222
E7 WT T0 controle du 031023 C10 - x40-4	2.80752	0.13991	0.523214	7.14748	0.382948	4.42512	1.77173	1.17652	1.00047	2.1878	0.686305	0.0145222	0.175	1.07143	65.2887	1.18438	0.00274061	0.0997319	1.12192	1.41851
E7 WT T0 controle du 031023 C10 - x40-5	2.53327	0.191854	0.544598	5.2123	0.475072	3.61905	1.64191	1.22512	1.00736	2.21318	0.688782	0.00921111	0.0616667	0.636364	34.3257	1.09105	0.00170062	0.177096	1.5259	1.66711
E7 WT T0 controle du 031023 C10 - x40-6	2.66818	0.164253	0.0648301	6.08816	0.244715	2.93074	2.10507	1.60456	0.973106	8.19626	0.89126	0.0109333	0.323333	0.9	46.9886	1.1251	0.00178695	0.0450835	1.19893	3.57741
E7 WT T0 controle du 031023 C10 - x40-7	2.49135	0.201341	0.171213	4.9667	0.474907	2.99248	4.18299	3.02165	0.874298	2.65	0.726027	0.00567778	0.133333	1.75	16.8221	1.01944	0.000936315	0.377964	8.1576	11.9711
E7 WT T0 controle du 031023 C10 - x40-8	2.42632	0.216992	0.459665	4.60847	0.447368	3.07018	2.03369	1.22972	0.996033	2.30216	0.697168	0.0051	0.195	1	16.6531	1.04721	0.000874741	0.355474	1.27658	1.32775
E7 WT T0 controle du 031023 C10 - x40-9	2.68462	0.161173	0.187445	6.2045	0.286364	3.34682	1.46147	1.02794	1.00801	3.55921	0.780664	0.0077	0.323333	0.833333	33.1904	1.06245	0.00121386	0.65023	1.71493	2.5611
E7 WT T0 controle du 031023 C2 - x40-2	2.72613	0.153653	0.181467	6.50816	0.355049	3.78205	2.0978	1.54533	0.975271	4.10938	0.804281	0.00726667	0.348333	1.22222	33.6293	1.08084	0.00112351	0.47571	1.14585	2.37111
E7 WT T0 controle du 031023 C2 - x40-3	2.84288	0.134328	0.1924	7.44445	0.299306	4.42188	1.71068	1.22488	1.08572	5.23494	0.839614	0.0115	0.625	1.25	46.4914	1.16045	0.00188474	0.792477	1.12488	1.13332
E7 WT T0 controle du 031023 C2 - x40-4	2.80962	0.139571	0.211059	7.16483	0.254511	3.44444	2.45933	1.43197	0.952928	4.19617	0.807551	0.0120667	0.513333	1.14286	50.7651	1.1269	0.00200188	0.279766	1.11559	1.19622
E7 WT T0 controle du 031023 C2 - x40-5	2.90894	0.124489	0.108733	8.03281	0.316422	4.23361	2.50569	2.13788	0.936935	5.35749	0.842705	0.0146222	0.581667	1	58.6339	1.18489	0.00251117	0.298171	2.94132	5.86316
E7 WT T0 controle du 031023 C2 - x40-6	2.52884	0.192833	0.187647	5.18582	0.319073	2.84	3.02205	2.01145	0.969518	2.31481	0.698324	0.00596667	0.105	2.5	24.0667	1.00762	0.000964529	0.172613	3.84022	4.6024
E7 WT T0 controle du 031023 C3 - x40-10	2.64474	0.168747	0.111571	5.92605	0.348608	3.32258	2.44215	2.14722	0.949603	4.27193	0.810316	0.00667778	0.236667	1.57143	30.0637	1.05882	0.00102902	0.310654	2.98977	7.00959
E7 WT T0 controle du 031023 C3 - x40-11	2.63367	0.17091	0.164218	5.85103	0.269798	2.86335	2.84155	2.06241	0.942157	2.12658	0.680162	0.00548889	0.115	3.33333	17.1905	1.0293	0.000827586	0.371015	2.09219	4.91757
E7 WT T0 controle du 031023 C3 - x40-12	2.4957	0.200334	0.102886	4.99167	0.280664	2.29605	3.10014	2.33229	0.868246	2.66981	0.727506	0.00432222	0.0833333	1.5	16.8233	0.97364	0.000645145	0.627149	3.60629	8.53251
E7 WT T0 controle du 031023 C3 - x40-2	2.96124	0.117216	0.0762523	8.53126	0.175504	3.36749	2.09989	1.55935	0.942215	3.98995	0.799597	0.0110333	1.16667	1.05	75.5982	1.1272	0.00161761	0.130843	1.67074	4.26892
E7 WT T0 controle du 031023 C3 - x40-3	2.6067	0.176301	0.125668	5.67212	0.308297	2.73301	4.11769	2.94799	0.867783	2.08661	0.67602	0.00871111	0.185	1.5	36.9811	1.0582	0.00142849	0.202031	9.70243	14.1388
E7 WT T0 controle du 031023 C3 - x40-4	2.76775	0.146464	0.11975	6.82763	0.305358	3.61905	2.15845	1.73579	0.959223	4.08247	0.803245	0.0109556	0.453333	1	40.4558	1.11633	0.00175481	0.700623	2.29872	3.59869
E7 WT T0 controle du 031023 C3 - x40-5	2.95982	0.117408	0.0975229	8.51733	0.191534	3.68519	2.20326	1.3203	0.988628	5.9172	0.855433	0.0120667	0.371667	2.07692	59.9526	1.15352	0.00179601	0.244648	1.36813	1.40563
E7 WT T0 controle du 031023 C3 - x40-6	2.96602	0.116572	0.0441029	8.5784	0.160243	3.10112	2.47787	1.86679	0.903073	7.28931	0.879363	0.0146444	1.085	3.88889	61.0492	1.17209	0.00216264	0.615924	2.30841	3.90844
E7 WT T0 controle du 031023 C3 - x40-7	2.59481	0.178731	0.286746	5.595	0.372049	3.51124	2.24074	1.8232	1.02887	1.78151	0.640483	0.0110333	0.251667	3.75	37.2893	1.11738	0.00190721	0.343256	3.98418	4.37695
E7 WT T0 controle du 031023 C3 - x40-8	2.71412	0.155793	0.0885973	6.41879	0.333087	3.59474	2.90906	2.66165	0.970365	4.92763	0.831299	0.0100111	0.495	1	36.3485	1.11596	0.00169119	0.417434	11.9509	11.9517
E7 WT T0 controle du 031023 C3 - x40-9	2.72212	0.154364	0.208114	6.47819	0.324841	4	1.74701	1.30308	1.08336	3.3871	0.772059	0.00906667	0.145	2.75	27.6571	1.11835	0.00152891	0.273413	2.39626	2.39827
E7 WT T0 controle du 031023 C4 - x40-1	2.75904	0.147939	0.0898281	6.75953	0.300208	3.34979	3.02761	1.8512	0.904462	4.88776	0.830156	0.0128222	0.788333	1.21429	56.1837	1.14056	0.00222075	0.541197	5.14848	5.54381
E7 WT T0 controle du 031023 C4 - x40-2	3.13245	0.0962454	0.0833872	10.3901	0.26436	5.74216	1.81799	1.40335	1.07487	7.62931	0.884116	0.0222444	0.678333	0.945946	129.628	1.27664	0.00361973	0.368598	1.21141	2.18954
E7 WT T0 controle du 031023 C4 - x40-3	2.94111	0.119963	0.10398	8.33589	0.230275	3.9322	2.0146	1.44197	0.983017	5.81858	0.853342	0.0171222	0.808333	1.57895	77.3848	1.20508	0.00280719	0.459241	1.64515	2.12375
E7 WT T0 controle du 031023 C4 - x40-4	2.55505	0.187102	0.240506	5.34468	0.366331	3.34043	2.10471	1.78565	1.03263	2.32258	0.699029	0.00686667	0.153333	1.5	25.5208	1.03035	0.00115021	0.292849	4.33697	5.07397
E7 WT T0 controle du 031023 C4 - x40-5	2.72863	0.153212	0.332169	6.52691	0.374231	4.73885	1.48858	1.03183	1.18685	3.30833	0.767892	0.0114889	0.145	1.4	49.8753	1.14341	0.00198714	0.21769	1.03567	1.4909
E7 WT T0 controle du 031023 C4 - x40-6	2.9286	0.121704	0.0409217	8.21667	0.254453	3.59075	3.5779	2.49118	0.866334	7.05369	0.875833	0.0133333	0.991667	0.92	81.1265	1.174	0.00208209	1.01201	4.10748	11.0527
E7 WT T0 controle du 031023 C4 - x40-7	3.07482	0.102848	0.0787583	9.72307	0.291548	5.55814	1.56839	1.25226	1.0587	10.7214	0.914686	0.0261778	2.20333	0.836735	157.721	1.29401	0.00428725	0.904619	1.36932	1.75803
E7 WT T0 controle du 031023 C5 - x40-10	2.79403	0.142098	0.0664026	7.03738	0.340848	3.57658	3.99882	2.88907	0.870515	6.1844	0.860809	0.0112556	0.618333	1.09091	44.5057	1.1173	0.00189571	0.749465	13.5073	13.5492
E7 WT T0 controle du 031023 C5 - x40-11	2.74273	0.150743	0.0529598	6.6338	0.251858	3.03478	4.22029	3.45576	0.911564	3.84066	0.793417	0.00978889	0.873333	1.625	38.4778	1.11033	0.00154164	0.832103	15.5952	16.9556
E7 WT T0 controle du 031023 C5 - x40-12	2.98445	0.114125	0.0896099	8.76231	0.191531	3.9572	1.66085	1.17292	1.03193	6.05263	0.858209	0.0119111	0.566667	1	58.5043	1.13531	0.00175272	0.508326	1.44749	1.84549
E7 WT T0 controle du 031023 C5 - x40-2	2.85612	0.132296	0.122402	7.55881	0.216141	3.58065	1.66262	1.30068	1.01892	5.12335	0.836691	0.0154444	0.708333	1.2	84.7773	1.19657	0.00248249	0.107288	1.75644	2.11362
E7 WT T0 controle du 031023 C5 - x40-3	2.88224	0.128376	0.0921515	7.78962	0.237644	3.82063	2.57583	1.65048	1.00613	5.14194	0.837185	0.0105778	0.465	1	61.2811	1.13032	0.00162025	0.133631	1.25518	2.6869
E7 WT T0 controle du 031023 C5 - x40-4	2.6493	0.167863	0.0877191	5.95722	0.267375	2.48325	4.47156	3.61256	0.806152	2.12953	0.680464	0.00671111	0.446667	3.75	28.9075	1.03305	0.00101067	0.219119	4.39215	19.5479
E7 WT T0 controle du 031023 C5 - x40-5	2.65103	0.167529	0.247564	5.96911	0.228581	2.88021	2.02266	1.88892	1.00924	1.732	0.633968	0.00758889	0.225	22	28.97	1.07591	0.00118176	0.0765279	4.06301	4.07076
E7 WT T0 controle du 031023 C5 - x40-6	2.8879	0.127543	0.0941924	7.84051	0.217604	3.77959	1.36693	1.12383	1.0334	5.64671	0.84955	0.0123333	0.566667	1.5	42.8431	1.13636	0.00193659	0.764057	1.76002	1.78447
E7 WT T0 controle du 031023 C5 - x40-7	2.94892	0.11889	0.0920059	8.41114	0.270432	4.54589	2.27909	1.93896	1.03929	6.16547	0.860442	0.0110667	0.485	1.6875	56.9907	1.13135	0.00171323	0.519693	4.96048	4.96849
E7 WT T0 controle du 031023 C5 - x40-8	2.96284	0.116999	0.0660805	8.54706	0.18342	3.58203	2.20165	1.51825	0.978564	4.98693	0.832969	0.0101778	0.463333	2.83333	42.464	1.11641	0.00145685	0.512933	2.56847	2.87034
E7 WT T0 controle du 031023 C5 - x40-9	2.62074	0.173475	0.450827	5.76452	0.276611	3.43558	1.4805	1.04589	1.13319	1.85551	0.6498	0.00834444	0.0783333	2	32.5328	1.07818	0.00144871	0.186066	1.07841	1.21465
E7 WT T0 controle du 031023 C6 - x40-1	2.81772	0.138275	0.334522	7.23196	0.402112	4.82474	1.57272	1.35155	1.05207	3.93704	0.797449	0.0148111	0.336667	1.41176	65.5654	1.19857	0.00258667	0.0987544	1.21452	1.27053
E7 WT T0 controle du 031023 C6 - x40-10	2.47869	0.204295	0.0955337	4.89488	0.404858	2.83212	4.1444	3.52772	0.909322	3.5045	0.778	0.00555556	0.2	1.28571	19.0129	1.02111	0.000886058	0.240832	21.3045	24.7378
E7 WT T0 controle du 031023 C6 - x40-3	2.85106	0.133068	0.210235	7.51495	0.378065	4.72539	2.07809	1.67227	1.02265	3.15603	0.759386	0.0130222	0.468333	1.26667	58.9225	1.15073	0.00224007	0.300739	3.9068	3.95553
E7 WT T0 controle du 031023 C6 - x40-4	2.68723	0.160689	0.0876229	6.22318	0.272556	3.01523	2.82292	1.835	0.928067	3.61783	0.783448	0.00805556	0.425	1.125	40.1426	1.09051	0.00125637	0.58722	2.99697	7.70774
E7 WT T0 controle du 031023 C6 - x40-5	2.96575	0.116608	0.331898	8.57574	0.398096	5.67347	1.59097	1.35718	1.04854	3.9011	0.795964	0.0148667	0.223333	1.38889	61.0563	1.17812	0.00259751	0.122261	1.26312	1.32947
E7 WT T0 controle du 031023 C6 - x40-6	2.5721	0.183466	0.414092	5.45059	0.340909	3.35329	1.6742	1.17033	1.05368	1.91667	0.657143	0.00933333	0.135	1.625	30.6159	1.09363	0.00167819	0.325503	1.75196	1.75716
E7 WT T0 controle du 031023 C6 - x40-7	2.79904	0.141281	0.0631361	7.07811	0.188096	2.61594	2.91755	2.33717	0.852159	4.20755	0.807971	0.0092	0.678333	2.55556	57.423	1.08491	0.00135177	0.771629	2.0349	7.52419
E7 WT T0 controle du 031023 C6 - x40-8	3.01138	0.110641	0.081183	9.03822	0.202917	4.28571	1.65822	1.32166	1.05264	7.22078	0.878357	0.0140667	0.716667	2.17647	76.6763	1.1845	0.0021356	0.276802	2.05764	2.05776
E7 WT T0 controle du 031023 C6 - x40-9	2.98415	0.114164	0.101508	8.75935	0.233987	4.15745	2.16079	1.81048	0.981202	3.82927	0.792929	0.011	0.421667	2.7	57.7949	1.14263	0.00160958	0.384024	2.95556	5.46186
E7 WT T0 controle du 031023 C7 - x40-1	2.91338	0.123855	0.0549401	8.07397	0.220008	3.32258	2.87594	2.20937	0.877342	6.04027	0.85796	0.0116556	0.751667	1.41667	70.0011	1.15184	0.00177541	0.419951	1.09683	9.24605
E7 WT T0 controle du 031023 C7 - x40-2	2.83473	0.135594	0.0598723	7.37497	0.297243	3.79283	2.36737	2.13557	0.943295	7.03636	0.875566	0.0147333	0.96	1	80.6512	1.18791	0.00246069	0.329541	2.87924	10.2421
E7 WT T0 controle du 031023 C7 - x40-3	2.89848	0.125998	0.220635	7.93662	0.255968	3.95669	1.92834	1.45873	0.98538	3.2392	0.764107	0.0141778	0.38	1.1875	72.0256	1.17915	0.00245533	0.170285	1.87962	2.638
E7 WT T0 controle du 031023 C7 - x40-4	3.1566	0.0936061	0.0598181	10.6831	0.236444	5.01684	2.29011	1.64006	0.965761	8.26946	0.892119	0.0172	1.14833	1.32	116.438	1.21834	0.0025876	0.511496	1.13804	3.82411
E7 WT T0 controle du 031023 C7 - x40-5	2.74752	0.149914	0.18356	6.67049	0.331086	3.66832	2.09304	1.23883	0.955739	5.02454	0.834012	0.0109111	0.231667	1.27273	40.0012	1.13261	0.00187632	0.270776	1.55505	1.78327
E7 WT T0 controle du 031023 C7 - x40-6	3.03286	0.107938	0.0699496	9.2646	0.265187	4.27273	3.35622	2.88651	0.895576	4.972	0.832552	0.0165889	0.826667	1.28571	87.6106	1.21643	0.00271932	0.103521	8.0521	12.7255
E7 WT T0 controle du 031023 C7 - x40-7	3.15406	0.0938806	0.0830871	10.6518	0.271958	5.49466	1.63986	1.03596	0.989158	10	0.909091	0.0185778	0.895	0.875	113.306	1.23678	0.00297284	0.504169	1.04973	1.36228
E7 WT T0 controle du 031023 C8 - x40-10	2.42467	0.217406	0.249118	4.59969	0.415456	2.84967	2.01036	1.54711	0.961178	2.86486	0.741259	0.00794444	0.208333	0.7	31.3981	1.08479	0.00138965	0.354787	2.57594	4.31819
E7 WT T0 controle du 031023 C8 - x40-11	2.92491	0.122223	0.102577	8.18179	0.279815	4.04219	2.33946	1.87495	0.933971	4.42786	0.815765	0.0121222	0.405	1.41667	60.9989	1.14121	0.00187499	0.258672	2.70622	4.89013
E7 WT T0 controle du 031023 C8 - x40-12	2.71857	0.154996	0.153205	6.45178	0.319907	3.49261	2.54834	1.71081	0.957103	3.08936	0.755463	0.0106778	0.285	1.42857	35.2617	1.10388	0.00184835	0.260073	3.37039	3.5533
E7 WT T0 controle du 031023 C8 - x40-13	2.37783	0.229451	0.779258	4.35823	0.524937	3.40708	1.47226	1.0916	1.07899	1.67672	0.626409	0.0069	0.0666667	0.363636	19.4576	1.1004	0.00127527	0.313415	1.07444	1.16584
E7 WT T0 controle du 031023 C8 - x40-14	2.72596	0.153683	0.296446	6.50692	0.369392	3.75556	2.4808	1.66892	0.949632	2.64674	0.725782	0.0149111	0.481667	1.85714	36.2875	1.17793	0.00284834	0.147002	1.78944	2.50422
E7 WT T0 controle du 031023 C8 - x40-15	2.63227	0.171186	0.320697	5.84159	0.339942	3.37838	2.27376	1.72165	0.991917	2.11765	0.679245	0.00647778	0.151667	2.5	23.7601	1.05534	0.00103516	0.301511	1.05143	2.06741
E7 WT T0 controle du 031023 C8 - x40-16	2.77117	0.145889	0.226301	6.85454	0.341977	4.09497	2.32413	1.64998	1.02158	2.27338	0.694505	0.0101111	0.488333	1	45.1915	1.11391	0.00173691	0.432219	4.63581	4.78841
E7 WT T0 controle du 031023 C8 - x40-17	2.43418	0.215038	0.259439	4.65035	0.331853	2.67376	2.23344	1.49566	0.998077	2.20859	0.688337	0.00581111	0.116667	1.6	20.0694	1.00261	0.000930742	0.195553	1.52262	2.04056
E7 WT T0 controle du 031023 C8 - x40-2	2.59528	0.178635	0.165203	5.59802	0.383972	3.53012	2.84502	2.21709	1.01767	2.85841	0.740826	0.00968889	0.42	2	29.4799	1.10307	0.0016843	0.665327	5.51376	6.25788
E7 WT T0 controle du 031023 C8 - x40-3	2.4603	0.208667	0.733399	4.79233	0.569416	3.92857	1.5605	1.29	1.08636	1.62848	0.619552	0.00943333	0.095	0.833333	18.2586	1.10953	0.00187012	0.1716	1.92894	1.95424
E7 WT T0 controle du 031023 C8 - x40-4	2.33625	0.240702	0.174306	4.15452	0.51313	2.65772	4.3492	3.74362	0.893047	2.52683	0.716459	0.00803333	0.258333	0.571429	18.9208	1.03098	0.00145142	0.382899	17.0515	17.1077
E7 WT T0 controle du 031023 C8 - x40-5	2.49172	0.201255	0.304782	4.96882	0.212411	2.20657	1.75848	1.36517	0.963557	2.42308	0.707865	0.00791111	0.225	1.25	35.0972	1.05271	0.00130074	0.322386	1.2532	1.40827
E7 WT T0 controle du 031023 C8 - x40-6	2.85496	0.132472	0.12378	7.54877	0.280634	3.83178	2.34114	1.64369	0.958196	4.27528	0.810437	0.0104333	0.348333	2.8	41.1682	1.12686	0.00163115	0.323058	3.06524	3.08628
E7 WT T0 controle du 031023 C8 - x40-7	2.59311	0.179082	0.310113	5.58403	0.389335	3.51538	1.53524	1.08349	1.00894	3.16406	0.75985	0.00592222	0.0833333	2.25	20	1.08725	0.000937755	0.435308	1.16577	1.51957
E7 WT T0 controle du 031023 C8 - x40-8	2.81811	0.138214	0.179286	7.23517	0.322603	4.07812	2.50347	1.64576	0.992379	3.21719	0.762876	0.0103556	0.113333	2	43.5668	1.12434	0.00173991	0.118104	2.96631	3.62109
E7 WT T0 controle du 031023 C8 - x40-9	2.68373	0.161339	0.256943	6.19812	0.367089	3.80435	2.2221	1.62629	1.01306	2.8447	0.739901	0.0112778	0.316667	0.615385	50.6325	1.13599	0.00204743	0.289385	2.52566	3.11219
E7 WT T0 controle du 031023 C9 - x40-10	2.469	0.206587	0.180027	4.84057	0.359854	2.95349	2.1884	1.79058	1.01713	2.42361	0.707911	0.00547778	0.175	3.5	16.9885	1.00895	0.000890029	0.72201	1.3732	6.4102
E7 WT T0 controle du 031023 C9 - x40-11	2.76072	0.147654	0.0913597	6.77261	0.365617	3.723	2.80426	2.43012	0.909127	4.8973	0.830431	0.0121222	0.763333	0.866667	56.3753	1.14577	0.00213683	0.594814	4.31259	11.9728
E7 WT T0 controle du 031023 C9 - x40-12	2.86406	0.131091	0.318181	7.62829	0.373422	5.09626	1.32088	1.08805	1.09326	3.90909	0.796296	0.0138	0.208333	0.583333	76.4661	1.18503	0.00241436	0.228768	1.27882	1.36695
E7 WT T0 controle du 031023 C9 - x40-13	2.71881	0.154953	0.153944	6.45359	0.342371	3.86022	2.38269	1.82154	1.02226	3.56019	0.780711	0.0109444	0.338333	1.22222	51.4967	1.11142	0.00181102	0.542601	5.07766	5.12457
E7 WT T0 controle du 031023 C9 - x40-14	2.84441	0.134091	0.068631	7.45764	0.27248	3.17871	4.68893	3.49389	0.816549	2.55872	0.719	0.0111111	0.998333	1.35714	48.6356	1.13233	0.00179881	0.851469	17.6614	25.1907
E7 WT T0 controle du 031023 C9 - x40-15	2.53547	0.191367	0.368685	5.22555	0.487294	3.72441	1.89312	1.52749	1.02101	2.54348	0.717791	0.00724444	0.065	0.833333	20.1047	1.06918	0.00129498	0.238219	1.11764	2.65038
E7 WT T0 controle du 031023 C9 - x40-16	2.79885	0.141313	0.230211	7.07651	0.302153	4.0289	2.00362	1.45274	1.03575	2.93878	0.746114	0.00857778	0.183333	0.9	47.2656	1.08255	0.00140541	0.339536	2.32106	2.3322
E7 WT T0 controle du 031023 C9 - x40-17	2.81363	0.138928	0.0233726	7.19799	0.279533	3.45	4.86362	3.71032	0.906549	7.84874	0.88699	0.0117	1.51667	1.08333	49.4914	1.13159	0.00188529	1.28583	23.3321	23.9475
E7 WT T0 controle du 031023 C9 - x40-18	2.75844	0.148043	0.278518	6.7548	0.27664	3.57672	1.48147	1.13849	1.00673	2.33473	0.700125	0.00885556	0.158333	1.8	42.5018	1.07969	0.00138125	0.334169	1.48509	1.50004
E7 WT T0 controle du 031023 C9 - x40-19	2.77488	0.145266	0.387997	6.8839	0.375394	3.79044	2.32207	1.7598	0.898693	1.78906	0.641457	0.0198333	0.148333	1.13333	63.1974	1.23759	0.00394432	0.118345	1.28639	4.14948
E7 WT T0 controle du 031023 C9 - x40-2	2.58454	0.180857	0.309962	5.52922	0.413011	3.7541	1.84998	1.33055	1.05648	2.64	0.725275	0.00606667	0.0766667	2	22.3131	1.0386	0.0010002	0.230464	2.04629	2.18358
E7 WT T0 controle du 031023 C9 - x40-20	2.48128	0.203687	0.166702	4.9095	0.404896	2.7284	3.99338	3.07919	0.873369	1.72152	0.632558	0.00716667	0.268333	1.42857	29.6569	1.07184	0.00119613	0.513387	9.22387	14.5871
E7 WT T0 controle du 031023 C9 - x40-21	2.25906	0.263072	0.192751	3.80124	0.401034	2.09333	3.12067	2.46027	0.869607	1.77041	0.639042	0.00603333	0.143333	2.33333	22.317	1.03651	0.0009918	0.687965	1.34456	8.90568
E7 WT T0 controle du 031023 C9 - x40-22	2.66571	0.164721	0.136136	6.07087	0.34173	3.50857	2.27912	1.86984	0.988639	3.87425	0.79484	0.00904444	0.226667	0.928571	44.1437	1.09457	0.00149876	0.0495682	5.68342	5.84717
E7 WT T0 controle du 031023 C9 - x40-3	2.27744	0.257564	0.278081	3.88254	0.466993	2.44545	3.00834	2.17156	0.921699	1.93846	0.659686	0.00424444	0.0616667	4	6.34921	0.95877	0.000712679	0.409316	1.754	6.0735
E7 WT T0 controle du 031023 C9 - x40-4	2.73353	0.152348	0.350712	6.56391	0.397957	3.78846	2.2283	1.73319	0.914919	2.14386	0.68192	0.0199111	0.135	1.13333	65.5393	1.23924	0.00398061	0.118114	1.16155	4.09163
E7 WT T0 controle du 031023 C9 - x40-5	2.9775	0.115041	0.150382	8.69253	0.266888	4.74312	1.85371	1.47042	1.05622	4.41346	0.815275	0.0125111	0.35	1.46667	83.5828	1.16183	0.00190858	0.208607	2.30227	2.5212
E7 WT T0 controle du 031023 C9 - x40-6	2.68005	0.162024	0.250648	6.17194	0.37928	3.80357	2.20046	1.62125	1.00067	3.53723	0.779601	0.00947778	0.301667	1.15385	54.8586	1.11332	0.00163585	0.171197	2.31298	2.69603
E7 WT T0 controle du 031023 C9 - x40-7	2.77324	0.145541	0.163084	6.87093	0.340122	4.21311	1.92431	1.6373	1.05141	4.41622	0.815369	0.0111333	0.186667	1.16667	47.9853	1.11728	0.00193312	0.21192	3.5156	4.06429
E7 WT T0 controle du 031023 C9 - x40-8	2.78518	0.143555	0.305256	6.96599	0.355987	4.11558	1.76493	1.35103	0.990219	3.28016	0.766364	0.0122222	0.181667	1.4	47.4496	1.13761	0.00216093	0.193061	1.7962	1.89803
E7 WT T0 controle du 031023 C9 - x40-9	2.8305	0.136256	0.105326	7.33913	0.326742	3.84186	3.29416	2.72774	0.915786	3.36364	0.770833	0.0112	0.943333	0.6	68.0824	1.12326	0.0018394	0.567821	8.62895	11.9428
E8 WT T0 controle du 031023 C1 - x40-10	2.84331	0.13426	0.189683	7.44822	0.270539	3.84146	1.88082	1.44767	0.991585	3.6413	0.784543	0.0142333	0.351667	1.75	56.8368	1.16562	0.00240826	0.150461	2.36329	2.48227
E8 WT T0 controle du 031023 C1 - x40-2	3.07149	0.103243	0.217932	9.68592	0.261908	5.55678	1.54413	1.20628	1.12101	4.24731	0.809426	0.0216889	0.656667	2.05	92.357	1.27002	0.00380181	0.160046	1.06187	1.24131
E8 WT T0 controle du 031023 C1 - x40-3	3.11939	0.0977037	0.0731339	10.235	0.246158	5.10968	1.48906	1.1595	1.00623	9.70787	0.906611	0.0211778	1.37	1.31818	99.1875	1.24585	0.00346255	0.476631	1.76842	1.83138
E8 WT T0 controle du 031023 C1 - x40-4	2.62287	0.17305	0.242392	5.77868	0.45927	3.98077	2.86627	2.39866	1.01649	2.41636	0.707291	0.0102111	0.145	0.692308	40.3754	1.10997	0.00186616	0.368805	7.2353	7.66665
E8 WT T0 controle du 031023 C1 - x40-5	2.67873	0.162271	0.194505	6.16253	0.260829	3.20961	2.03494	1.14564	1.0198	3.16176	0.759717	0.0125778	0.476667	3	29.3965	1.13384	0.00224339	0.479251	1.00744	1.4796
E8 WT T0 controle du 031023 C1 - x40-6	2.91295	0.123917	0.144247	8.06992	0.26554	4.35361	1.75748	1.21504	1.04693	5.408	0.843945	0.0178	0.695	1.2381	81.0362	1.22141	0.00311605	0.339824	1.43048	1.77001
E8 WT T0 controle du 031023 C1 - x40-7	2.86891	0.130361	0.190998	7.67098	0.325117	4.36207	1.92544	1.43026	0.997291	3.82578	0.79278	0.0153889	0.246667	0.85	71.9135	1.18055	0.00274158	0.120168	2.81805	2.9219
E8 WT T0 controle du 031023 C1 - x40-8	2.90245	0.125424	0.009462	7.97299	0.0788452	2.06175	1.83876	1.27862	0.920933	16.6447	0.943326	0.0149	1.735	1.41176	68.3289	1.17581	0.00227691	0.79615	13.1375	13.5763
E8 WT T0 controle du 031023 C1 - x40-9	2.80914	0.139647	0.0847589	7.16089	0.310374	3.68421	3.48333	2.29672	0.923495	5.15169	0.837443	0.0121667	0.67	1.15385	58.6957	1.12989	0.00202115	0.446191	7.1196	7.11961
E8 WT T0 controle du 031023 C10 - x40-10	3.2128	0.0877418	0.149271	11.3971	0.284439	6.29245	1.57602	1.24952	1.03522	6.45593	0.865879	0.0272556	0.481667	0.911111	186.272	1.29655	0.00462845	0.162783	1.20887	1.58458
E8 WT T0 controle du 031023 C10 - x40-11	2.75209	0.149128	0.166786	6.70567	0.374267	4.01538	2.60065	1.79089	0.978801	3.48347	0.776959	0.0120556	0.403333	1	61.6655	1.13232	0.00207874	0.322719	4.32706	4.78569
E8 WT T0 controle du 031023 C10 - x40-12	2.40405	0.222627	0.664703	4.49182	0.515152	3.33333	1.88473	1.42933	1.03393	1.16667	0.538462	0.00736667	0.0633333	1.125	21.2017	1.0682	0.00135193	0.194184	2.41014	2.8795
E8 WT T0 controle du 031023 C10 - x40-13	2.20061	0.281383	0.419191	3.55387	0.590753	2.46316	3.01496	2.36526	0.901753	1.51825	0.602899	0.00383333	0.0316667	1.66667	7.3125	0.977794	0.000665148	0.327485	1.57701	5.9275
E8 WT T0 controle du 031023 C10 - x40-2	3.22826	0.0861933	0.0525254	11.6018	0.223013	5.09115	2.17157	1.74289	0.929234	7.49402	0.88227	0.0236889	1.95	1.61538	119.949	1.28282	0.00377533	0.530938	2.90969	4.10026
E8 WT T0 controle du 031023 C10 - x40-3	3.11211	0.098526	0.133503	10.1496	0.230535	4.97966	1.80777	1.25436	1.02184	4.76817	0.826635	0.0185222	0.646667	0.923077	99.3469	1.21721	0.00302553	0.343768	1.46612	2.03977
E8 WT T0 controle du 031023 C10 - x40-4	2.63566	0.170519	0.216721	5.86445	0.482812	4.10615	1.63573	1.30677	1.00767	5.72043	0.8512	0.0138889	0.613333	0.545455	53.2368	1.16565	0.0027386	0.707107	1.12828	2.55829
E8 WT T0 controle du 031023 C10 - x40-5	2.70214	0.157956	0.190937	6.33089	0.299167	3.13107	2.94373	1.85726	0.904213	2.97115	0.748184	0.00917778	0.295	2	41.9434	1.09331	0.00156625	0.143461	1.77853	4.03587
E8 WT T0 controle du 031023 C10 - x40-6	2.6859	0.160937	0.301565	6.21361	0.424352	4.06452	2.14895	1.42848	1.00416	3.75	0.789474	0.0130889	0.27	0.933333	52.043	1.16142	0.00241047	0.221892	2.00128	2.00164
E8 WT T0 controle du 031023 C10 - x40-7	2.27207	0.259161	0.181466	3.8586	0.400123	1.97175	4.38468	3.25757	0.80784	2.04206	0.671275	0.00723333	0.2	1.33333	27.6888	1.07745	0.00122266	0.123939	2.23052	13.3162
E8 WT T0 controle du 031023 C10 - x40-8	2.51313	0.196354	0.213424	5.09285	0.351052	2.76263	2.7131	1.8686	0.915536	2.97403	0.748366	0.0102	0.13	1.44444	31.0277	1.13094	0.0018446	0.339806	1.3616	4.5724
E8 WT T0 controle du 031023 C10 - x40-9	3.10124	0.0997667	0.102872	10.0234	0.278803	5.1374	2.10785	1.65929	0.97069	6.03431	0.85784	0.0159444	0.648333	1.04167	101.226	1.19349	0.00259495	0.192182	1.29887	4.02481
E8 WT T0 controle du 031023 C2 - x40-10	2.96624	0.116543	0.100712	8.58054	0.257657	4.01141	2.43289	1.92828	0.921003	4.09746	0.803824	0.0133667	0.608333	1.83333	74.2751	1.16955	0.00207717	0.0644692	2.2122	6.41672
E8 WT T0 controle du 031023 C2 - x40-2	3.2669	0.0824432	0.0880955	12.1296	0.216351	5.82133	1.62328	1.12564	1.0318	9.50952	0.904848	0.0245222	1.20333	1.48837	167.872	1.30029	0.00373278	0.200814	1.14512	1.30421
E8 WT T0 controle du 031023 C2 - x40-3	2.7145	0.155723	0.162332	6.42164	0.279459	3.43662	1.90749	1.40981	1.01234	3.4	0.772727	0.0114889	0.373333	2.5	35.7459	1.12152	0.00195021	0.310985	3.09537	3.10588
E8 WT T0 controle du 031023 C2 - x40-4	3.02915	0.1084	0.141159	9.22512	0.247995	5.05093	1.83106	1.24538	1.09946	5.21788	0.839173	0.0123667	0.336667	1.16667	68.5321	1.14774	0.00185263	0.0670251	1.11974	1.55614
E8 WT T0 controle du 031023 C2 - x40-5	3.03505	0.107666	0.0385069	9.28795	0.209117	3.94426	3.32579	2.90495	0.928649	5.23832	0.8397	0.0148333	1.57833	1.16667	79.2186	1.20307	0.00221217	0.455511	16.0048	16.9007
E8 WT T0 controle du 031023 C2 - x40-6	2.62464	0.172698	0.367617	5.79047	0.433972	4.21583	1.65023	1.3467	1.10519	2.62222	0.723926	0.00905556	0.188333	0.9	37.6288	1.11524	0.00161537	0.476439	1.17273	2.41923
E8 WT T0 controle du 031023 C2 - x40-7	2.92779	0.121817	0.164573	8.20901	0.291554	4.56938	1.9986	1.2274	1.03088	4.12857	0.805014	0.0119667	0.621667	4	53.316	1.16376	0.00188138	0.526018	1.467	1.74265
E8 WT T0 controle du 031023 C2 - x40-8	2.68125	0.161801	0.111096	6.18043	0.226499	2.8377	2.67539	1.72683	0.964749	3.13514	0.75817	0.0068	0.165	6	25.1379	1.05386	0.000987628	0.5	1.02796	3.96412
E8 WT T0 controle du 031023 C2 - x40-9	2.62034	0.173553	0.324167	5.76192	0.25693	2.89205	1.99548	1.27726	0.990217	1.68831	0.628019	0.0069	0.07	2.2	30.4641	1.048	0.00108524	0.204617	1.50711	1.7128
E8 WT T0 controle du 031023 C3 - x40-10	3.03896	0.107182	0.118758	9.32989	0.250139	4.54104	2.74657	1.80569	0.973171	3.68512	0.786558	0.0150444	0.89	1.5	84.507	1.1865	0.00236709	0.369638	2.93507	3.02496
E8 WT T0 controle du 031023 C3 - x40-11	2.84483	0.134026	0.0757803	7.46124	0.22536	3.38667	3.33627	2.59822	0.956144	3.58564	0.781928	0.00922222	0.41	1.33333	49.923	1.09645	0.00144999	0.173553	10.6825	10.9286
E8 WT T0 controle du 031023 C3 - x40-2	2.85076	0.133114	0.129773	7.51233	0.273253	3.54032	2.31728	1.62488	0.901541	4.12736	0.804968	0.0120778	0.535	1.54545	65.2811	1.1449	0.00190062	0.203466	1.08899	2.70793
E8 WT T0 controle du 031023 C3 - x40-3	2.2496	0.265953	0.324513	3.76006	0.504132	2.45192	2.89643	2.26163	0.918417	1.65217	0.622951	0.00406667	0.0233333	1	10.9649	0.999158	0.000662041	0.233762	1.82244	6.48982
E8 WT T0 controle du 031023 C3 - x40-4	1.96287	0.369971	0.897692	2.70291	0.708696	2.1358	2.91301	1.84835	0.93864	0.884393	0.469325	0.00362222	0.0166667	2	5.88235	0.971755	0.000650842	0.0553849	1.14754	3.10273
E8 WT T0 controle du 031023 C3 - x40-5	2.77563	0.14514	0.0501856	6.88989	0.355616	3.81564	2.36133	2.02013	0.928677	12.7193	0.92711	0.00868889	0.401667	2.42857	29.8055	1.11296	0.00137813	0.226166	1.73513	5.24724
E8 WT T0 controle du 031023 C3 - x40-6	2.99582	0.11264	0.0643144	8.87781	0.22	4.07937	2.64574	1.8242	0.97966	5.31361	0.841612	0.0118556	0.58	3	59.422	1.14677	0.0017878	0.489821	3.40117	5.11869
E8 WT T0 controle du 031023 C3 - x40-7	2.46515	0.207507	1.074	4.81912	0.441379	3.56522	1.57464	1.21291	1.11356	0.96587	0.491319	0.0064	0.00833333	1	23.1837	1.09252	0.00115523	0	1.21499	1.30756
E8 WT T0 controle du 031023 C3 - x40-8	2.97335	0.115592	0.105708	8.65109	0.236464	4.58203	1.65009	1.09956	1.08919	5.61991	0.848941	0.0162556	0.578333	1.69231	74.409	1.20835	0.00258814	0.0739474	1.63049	1.72544
E8 WT T0 controle du 031023 C3 - x40-9	2.75384	0.148828	0.139085	6.71917	0.183705	2.87417	1.73749	1.22451	0.998015	4.0687	0.802711	0.0147556	0.546667	2.25	43.363	1.17728	0.00263078	0.631741	3.26688	3.55398
E8 WT T0 controle du 031023 C4 - x40-1	2.74325	0.150653	0.1415	6.63775	0.35426	4.02985	1.85279	1.48139	1.02002	5.44022	0.844726	0.0131667	0.561667	1.08333	58.023	1.17496	0.00226684	0.62169	3.7338	3.75008
E8 WT T0 controle du 031023 C4 - x40-10	2.93333	0.121043	0.220201	8.26151	0.236727	4.09362	1.79035	1.11209	1.01841	3.26482	0.765524	0.0119889	0.403333	0.875	62.9346	1.12974	0.0018763	0.40957	1.14648	1.15168
E8 WT T0 controle du 031023 C4 - x40-11	2.80379	0.140511	0.101997	7.1169	0.239637	3.73684	1.89271	1.36012	1.0726	4.91045	0.830808	0.0088	0.625	1.16667	38.9058	1.0753	0.0013392	0.798515	2.17613	2.38542
E8 WT T0 controle du 031023 C4 - x40-12	2.82031	0.137864	0.128991	7.25355	0.259916	3.47619	2.5819	1.60057	0.940019	3.50279	0.777916	0.00895556	0.27	2.8	33.9968	1.10058	0.00136251	0.157524	1.04558	2.5193
E8 WT T0 controle du 031023 C4 - x40-2	2.54286	0.189747	0.530631	5.27018	0.471437	3.68276	1.49755	1.19395	1.01774	2.05993	0.673195	0.00907778	0.155	2.16667	22	1.11407	0.00166571	0.300957	1.5971	1.62438
E8 WT T0 controle du 031023 C4 - x40-3	2.62662	0.172304	0.318256	5.80371	0.452921	3.99485	1.83318	1.32758	1.02278	3.63725	0.784355	0.0157667	0.213333	0.846154	37.7583	1.17433	0.00307293	0.106186	1.1272	2.14203
E8 WT T0 controle du 031023 C4 - x40-4	2.99119	0.113243	0.124357	8.83058	0.277425	4.1963	2.58845	2.15035	0.902203	3.96212	0.798473	0.0145556	0.643333	1.72222	83.1979	1.20045	0.00233747	0.455668	1.02027	5.86319
E8 WT T0 controle du 031023 C4 - x40-5	2.95778	0.117683	0.185834	8.49739	0.256696	4.32046	1.5315	1.25137	1.00354	4.72614	0.825362	0.0153333	0.396667	1.21053	88.2256	1.20411	0.00250833	0.373972	1.6593	1.72416
E8 WT T0 controle du 031023 C4 - x40-6	3.0519	0.105598	0.319057	9.46988	0.359966	5.74167	1.86719	1.31569	1.01056	3.38802	0.772107	0.0187222	0.301667	1.10526	86.2606	1.22144	0.00334763	0.142049	1.66664	1.67531
E8 WT T0 controle du 031023 C4 - x40-7	2.92332	0.122447	0.221633	8.16682	0.242411	4.0819	1.92598	1.10683	1.01516	3.19608	0.761682	0.0118889	0.363333	0.842105	68.3387	1.12851	0.00186033	0.368122	1.16171	1.18952
E8 WT T0 controle du 031023 C4 - x40-8	3.02193	0.109305	0.0775145	9.1487	0.201703	4.125	2.0015	1.36628	1.00394	5.67785	0.850251	0.0110556	0.281667	3.33333	53.1253	1.14306	0.00162555	0.202993	1.49351	3.05429
E8 WT T0 controle du 031023 C5 - x40-10	2.54242	0.189843	0.234773	5.2675	0.358907	3.03106	2.36284	2.09288	0.960502	2.79444	0.736457	0.00758889	0.173333	4.25	25.837	1.09564	0.00126237	0.216454	1.2692	3.83021
E8 WT T0 controle du 031023 C5 - x40-11	2.88012	0.128691	0.112826	7.77057	0.279613	4.34211	2.50243	2.00057	1.05674	3.15278	0.759197	0.00996667	0.605	2.71429	43.442	1.09403	0.00155937	0.887169	6.09956	7.08121
E8 WT T0 controle du 031023 C5 - x40-12	2.95378	0.118227	0.0550146	8.45831	0.316008	4.36614	4.01478	3.04555	0.918259	7.19162	0.877924	0.0152	0.77	1.05	74.4388	1.18908	0.00253246	0.0604564	11.9109	13.1337
E8 WT T0 controle du 031023 C5 - x40-13	2.02302	0.34522	0.329604	2.8967	0.630085	2.36607	2.05926	1.64548	1.02902	2.94083	0.746246	0.0074	0.116667	0.6	19.3239	1.11264	0.0013983	0.516979	2.14073	4.26801
E8 WT T0 controle du 031023 C5 - x40-14	2.93288	0.121106	0.0621327	8.25724	0.249294	4.23556	1.72522	1.39991	1.02735	8.21739	0.891509	0.0117778	1.06833	2.625	58.9376	1.16261	0.0017489	1.0662	1.44239	3.17051
E8 WT T0 controle du 031023 C5 - x40-15	2.61953	0.173716	0.20597	5.75652	0.377825	3.4963	2.44788	1.71185	0.988104	3.4958	0.77757	0.00594444	0.085	1.6	16.5601	1.03991	0.000952167	0.259403	2.02173	3.57003
E8 WT T0 controle du 031023 C5 - x40-2	2.58981	0.179762	0.270563	5.5629	0.368421	3.47283	2.19485	1.39608	1.02851	2.36538	0.702857	0.0116667	0.313333	2.66667	27.7087	1.14215	0.0020738	0.381725	1.06902	3.07061
E8 WT T0 controle du 031023 C5 - x40-3	2.8496	0.133292	0.0658354	7.5023	0.182347	3.02344	2.77267	1.74197	0.943752	4.42949	0.815821	0.00941111	0.33	1.75	47.9363	1.10227	0.00135768	0.206162	2.5912	2.98587
E8 WT T0 controle du 031023 C5 - x40-4	2.3283	0.242916	0.144503	4.11665	0.307951	2.24074	3.19932	2.23792	0.98086	1.37069	0.578182	0.00305556	0.121667	1.5	15.7233	0.956167	0.000427219	0.772246	10.2627	10.432
E8 WT T0 controle du 031023 C5 - x40-5	2.37164	0.231092	0.177239	4.32727	0.345389	2.55422	2.60021	1.88545	1.00436	2.2931	0.696335	0.00212222	0.0166667	0	8.69173	0.889141	0.000268392	0.228814	3.84791	4.89352
E8 WT T0 controle du 031023 C5 - x40-6	2.16697	0.292495	0.154793	3.41886	0.485849	2.19643	3.12981	2.45497	0.92169	2.55172	0.718447	0.00114444	0.03	2	7.78378	0.768813	0.00013256	0.892254	1.19519	12.1803
E8 WT T0 controle du 031023 C5 - x40-7	2.38588	0.227333	0.188493	4.39883	0.394872	2.72414	2.19326	1.5384	0.985516	3.27778	0.766234	0.00256667	0.0816667	0.833333	20.339	0.930852	0.000340474	0.354318	3.09786	3.09886
E8 WT T0 controle du 031023 C5 - x40-8	2.83053	0.136251	0.613869	7.3394	0.37061	4.82407	1.64997	1.39064	1.07968	1.41566	0.586035	0.0178222	0.323333	1.35294	70.2649	1.20734	0.00347414	0.149813	1.77796	2.2447
E8 WT T0 controle du 031023 C5 - x40-9	1.76851	0.462754	2.41902	2.16098	0.874346	2.29508	1.39639	1.12243	1.13581	0.330677	0.248503	0.00371111	0	0	0.192771	0.96077	0.000723326	0.0547176	1.27791	1.418
E8 WT T0 controle du 031023 C6 - x40-10	2.54724	0.188793	0.161828	5.29681	0.44641	3.39506	2.10588	1.79065	0.959327	5	0.833333	0.00953333	0.116667	0.533333	33.1692	1.12507	0.00172424	0.199065	1.76779	5.00477
E8 WT T0 controle du 031023 C6 - x40-2	2.8552	0.132435	0.163719	7.55088	0.324087	4.37295	2.1222	1.65881	1.01729	4.79927	0.827565	0.0176556	0.38	0.5	89.4669	1.2045	0.00312802	0.248343	2.85361	2.91715
E8 WT T0 controle du 031023 C6 - x40-3	2.89709	0.1262	0.0917701	7.9239	0.268108	4.0051	2.58933	1.77633	0.976156	4.5	0.818182	0.00867778	0.238333	1.55556	45.7606	1.08773	0.00126242	0.182457	4.3841	4.66822
E8 WT T0 controle du 031023 C6 - x40-4	2.71716	0.155247	0.241624	6.44135	0.340253	3.87037	2.22887	1.74939	1.03009	2.19492	0.687003	0.00837778	0.205	3.66667	26.8803	1.10708	0.00137356	0.221521	2.64158	3.69829
E8 WT T0 controle du 031023 C6 - x40-5	3.01426	0.110275	0.168378	9.06824	0.219885	4.15976	2.02529	1.33925	0.978245	4.25549	0.809723	0.0212556	0.675	2.38095	104.328	1.25556	0.00358527	0.123124	1.30203	1.95966
E8 WT T0 controle du 031023 C6 - x40-6	2.81684	0.138415	0.106598	7.22463	0.261631	3.45089	2.4395	1.93435	0.933837	3.4439	0.774973	0.0101222	0.846667	1.5	42.8839	1.0965	0.00158931	0.589889	3.13336	3.4881
E8 WT T0 controle du 031023 C6 - x40-7	2.72024	0.154698	0.11466	6.46422	0.325106	3.40376	3.20734	1.84048	0.923486	4.38172	0.814186	0.0111222	0.465	1.11111	31.411	1.1269	0.00188147	0.698221	3.01022	3.06411
E8 WT T0 controle du 031023 C6 - x40-8	3.00966	0.11086	0.174077	9.02037	0.228393	4.37008	1.71193	1.35253	1.01373	3.19861	0.761826	0.0133889	0.535	2	82.9804	1.16106	0.00208536	0.155133	1.54746	2.43317
E8 WT T0 controle du 031023 C6 - x40-9	3.06192	0.104387	0.0559561	9.57973	0.206293	4.41667	1.84134	1.6302	1.01508	7.20468	0.878118	0.0155889	0.985	2.16667	75.013	1.18678	0.00236754	0.374718	1.79181	4.57766
E8 WT T0 controle du 031023 C7 - x40-2	3.16556	0.0926457	0.0470015	10.7938	0.188753	4.5133	2.46807	1.77538	0.962436	9.57527	0.90544	0.0218556	1.35333	2.63158	93.4666	1.26305	0.00344556	0.411453	1.08833	4.18505
E8 WT T0 controle du 031023 C7 - x40-3	3.05157	0.105638	0.056806	9.46629	0.199591	4.10204	2.28851	1.73631	0.96995	5.53532	0.846985	0.0195333	1.16167	1.22222	121.306	1.24069	0.00302327	0.202375	2.23167	5.47021
E8 WT T0 controle du 031023 C7 - x40-4	2.93551	0.120739	0.095791	8.28231	0.287558	4.29474	2.17753	1.69068	0.966991	5.55849	0.847526	0.0193111	0.975	0.62963	85.5567	1.23778	0.00346289	0.418914	4.75507	4.87558
E8 WT T0 controle du 031023 C7 - x40-5	2.8342	0.135677	0.167127	7.37044	0.272614	3.97696	1.69023	1.1283	1.03344	4.37438	0.813932	0.0121222	0.366667	2	48.7207	1.15402	0.00208987	0.260437	2.28474	2.36652
E8 WT T0 controle du 031023 C8 - x40-1	2.93705	0.120526	0.168805	8.29699	0.264654	4.13149	1.75904	1.16534	0.967936	4.64384	0.822816	0.0183111	0.491667	0.909091	107.051	1.20157	0.00328639	0.0550816	2.26837	2.27888
E8 WT T0 controle du 031023 C8 - x40-10	2.91652	0.123408	0.0781461	8.10318	0.224415	4.04237	1.85046	1.37441	1.05306	5.80864	0.853128	0.0122556	0.383333	1.125	50.5037	1.14682	0.00193339	0.40509	2.42512	2.81043
E8 WT T0 controle du 031023 C8 - x40-11	2.18128	0.287716	0.18582	3.47565	0.508929	1.94393	4.88973	4.05453	0.783998	1.08029	0.519298	0.00316667	0.0533333	0.5	10.277	0.945296	0.000476197	0.790292	10.6729	33.7819
E8 WT T0 controle du 031023 C8 - x40-12	2.34523	0.238225	0.330907	4.1977	0.437059	2.54098	3.35811	2.75864	0.915629	1.19192	0.543779	0.00482222	0.02	0.5	15.2542	1.03205	0.000785299	0.240008	9.49547	9.56809
E8 WT T0 controle du 031023 C8 - x40-13	3.12545	0.0970239	0.107739	10.3067	0.267937	4.68876	2.75311	2.24025	0.878862	4.24603	0.80938	0.0220333	0.878333	1.12	114.133	1.27043	0.00370809	0.157194	2.819	6.23291
E8 WT T0 controle du 031023 C8 - x40-14	2.60593	0.176458	0.191983	5.66706	0.365157	3.43429	1.95933	1.6438	1.00286	2.60887	0.722905	0.00994444	0.576667	1	45.1947	1.11202	0.0016619	0.630686	4.3432	5.17444
E8 WT T0 controle du 031023 C8 - x40-2	2.96078	0.117277	0.0328659	8.52679	0.215465	3.27576	3.58848	3.04116	0.827633	5.69634	0.850665	0.0142111	1.09	1.38889	84.9412	1.19463	0.00212218	0.253205	2.7529	23.2918
E8 WT T0 controle du 031023 C8 - x40-3	2.87215	0.129876	0.104428	7.69966	0.29137	4.5	1.98525	1.73702	1.08273	3.80282	0.791789	0.0113667	0.853333	1.75	53.9272	1.15074	0.00179188	0.862491	5.64587	6.09201
E8 WT T0 controle du 031023 C8 - x40-5	2.85669	0.132209	0.151003	7.56377	0.263731	4.27103	1.77077	1.43263	1.09955	3.84167	0.79346	0.0129111	0.34	1.84615	52.0184	1.17383	0.00207998	0.265646	2.58721	2.59469
E8 WT T0 controle du 031023 C8 - x40-6	2.96664	0.116489	0.201101	8.58453	0.236781	4.32281	1.50072	1.19242	1.03485	3.10777	0.756559	0.0182111	1.12833	1.53846	81.5516	1.2146	0.00302174	0.629749	1.08441	1.48673
E8 WT T0 controle du 031023 C8 - x40-7	2.24933	0.266037	0.214529	3.75888	0.415758	2.20886	3.53416	2.9281	0.91136	1.64865	0.622449	0.00762222	0.18	2	15.3653	1.04674	0.00137582	0.497809	12.8882	15.2487
E8 WT T0 controle du 031023 C8 - x40-8	2.80288	0.140659	0.296357	7.1094	0.380131	4.06939	3.07304	2.43817	0.928387	1.49601	0.599361	0.0173889	0.52	0.857143	62.952	1.21155	0.00335404	0.0911412	2.52947	6.82311
E8 WT T0 controle du 031023 C8 - x40-9	2.72013	0.154718	0.656273	6.46336	0.509849	4.56118	2.16521	1.71593	0.988322	1.66906	0.625337	0.0247333	0.288333	0.65	106.483	1.25457	0.00540422	0.234109	1.40138	2.7498
E8 WT T0 controle du 031023 C9 - x40-10	2.19863	0.282028	0.423053	3.54575	0.523952	2.4	2.59318	2.12256	0.935099	0.951673	0.487619	0.00583333	0.03	1.25	14.0625	1.01374	0.00101841	0.525538	1.44121	6.82598
E8 WT T0 controle du 031023 C9 - x40-11	2.8424	0.134402	0.158451	7.44035	0.395688	4.74479	1.50307	1.1938	1.01379	7.06081	0.875943	0.0132556	0.33	0.72	66.1904	1.14959	0.00236134	0.14476	1.7635	2.22706
E8 WT T0 controle du 031023 C9 - x40-12	2.64855	0.168008	0.372949	5.95211	0.477083	4.05556	1.66605	1.22453	0.986467	3.65759	0.785297	0.0133	0.14	0.722222	57.2596	1.15849	0.00251792	0.266479	1.74276	1.76045
E8 WT T0 controle du 031023 C9 - x40-13	2.92694	0.121936	0.078572	8.20099	0.249135	3.99567	2.13602	1.50255	0.976126	6.75385	0.871032	0.0112	0.606667	1.78571	68.3656	1.13571	0.00173267	0.524215	2.7289	4.38541
E8 WT T0 controle du 031023 C9 - x40-14	2.73709	0.151727	0.105922	6.59081	0.222939	2.92105	3.03261	2.2314	0.938659	2.2434	0.691682	0.0122889	0.78	2	43.7765	1.14468	0.00203847	0.55932	8.25744	9.89445
E8 WT T0 controle du 031023 C9 - x40-15	2.6543	0.166899	0.1975	5.99166	0.315574	3.44615	2.16895	1.51439	1.02385	2.87984	0.742258	0.0111222	0.306667	0.9	38.4401	1.1304	0.00190478	0.329987	1.34062	3.04928
E8 WT T0 controle du 031023 C9 - x40-16	2.43731	0.214265	0.305428	4.66712	0.491941	3.43609	2.37967	2.0891	1.04969	1.83643	0.647444	0.00847778	0.253333	0.555556	23.1761	1.06689	0.00154394	0.5655	5.37712	5.73692
E8 WT T0 controle du 031023 C9 - x40-17	2.87457	0.129515	0.0542171	7.72114	0.310593	3.59216	3.25555	3.0281	0.834791	6.22581	0.861607	0.0124444	0.901667	0.684211	72.2238	1.15246	0.00202214	0.601338	3.61295	13.2571
E8 WT T0 controle du 031023 C9 - x40-18	3.12748	0.0967981	0.209669	10.3308	0.298591	5.47213	1.60584	1.1205	0.96936	5.05539	0.834858	0.0230778	0.683333	0.729167	140.736	1.25437	0.00404244	0.288606	1.60201	1.62581
E8 WT T0 controle du 031023 C9 - x40-19	2.89663	0.126267	0.140743	7.91972	0.310711	4.2562	1.91523	1.42864	0.964126	5.0905	0.83581	0.0149556	0.713333	1.04167	84.872	1.20159	0.00245296	0.310777	1.10324	2.3472
E8 WT T0 controle du 031023 C9 - x40-2	3.13962	0.0954541	0.14146	10.4762	0.256047	5.20275	2.10247	1.37632	0.981449	4.50331	0.818291	0.0184667	0.668333	1.7	126.636	1.23455	0.00287134	0.314128	1.52597	2.25092
E8 WT T0 controle du 031023 C9 - x40-20	2.98469	0.114094	0.0717975	8.76472	0.264139	3.96727	3.02421	2.40384	0.88072	4.36087	0.813463	0.0137	0.543333	1	76.4995	1.20275	0.00214588	0.268666	1.33089	9.62842
E8 WT T0 controle du 031023 C9 - x40-21	2.82037	0.137854	0.125845	7.25407	0.334016	4.67204	1.74071	1.42041	1.1144	6.82192	0.872154	0.0126889	0.525	0.75	59.2861	1.16506	0.00215967	0.524363	2.33334	2.44853
E8 WT T0 controle du 031023 C9 - x40-22	2.82136	0.137698	0.182647	7.26229	0.306389	4.29648	1.53651	1.09375	1.06882	7.68504	0.884859	0.0122556	0.363333	1	60.0041	1.15769	0.00211231	0.217127	1.00746	1.01375
E8 WT T0 controle du 031023 C9 - x40-23	2.8748	0.129481	0.0779978	7.72312	0.272122	4.02609	2.083	1.60266	0.999329	5.69006	0.850524	0.0127111	0.745	1.5	50.6516	1.14132	0.00206497	0.549952	5.02083	5.06017
E8 WT T0 controle du 031023 C9 - x40-24	2.72264	0.154271	0.165066	6.48208	0.231367	2.98058	2.30062	1.34787	0.955951	3.4625	0.77591	0.00793333	0.133333	0	26.8664	1.07089	0.00126081	0.154303	1.66942	1.84062
E8 WT T0 controle du 031023 C9 - x40-25	2.06732	0.328055	0.661998	3.04827	0.682573	2.57895	2.09945	1.77037	1.02404	1.2381	0.553191	0.00365556	0.005	2	2.90659	0.968069	0.00065312	0.123278	2.4003	4.34264
E8 WT T0 controle du 031023 C9 - x40-26	2.51086	0.196867	0.164772	5.07957	0.421013	2.53586	4.24797	2.81471	0.769399	3.23574	0.763914	0.0123778	0.105	1	33.5617	1.16608	0.00234304	0.329572	1.5076	8.0239
E8 WT T0 controle du 031023 C9 - x40-27	2.93941	0.120199	0.1182	8.31955	0.255198	4.12851	2.64744	1.84038	0.982324	3.95918	0.798354	0.0135	0.46	4	65.9887	1.18128	0.00208863	0.06415	4.30659	4.308
E8 WT T0 controle du 031023 C9 - x40-28	1.88743	0.403545	1.03047	2.47804	0.784024	2.16667	2.88131	2.25355	0.98746	0.540698	0.350943	0.00294444	0.005	0	2.10753	0.915794	0.000519415	0	4.48632	4.63025
E8 WT T0 controle du 031023 C9 - x40-3	2.87827	0.128965	0.0927849	7.75404	0.302625	4.2	2.06049	1.35553	0.984622	6.63514	0.869027	0.0125556	0.896667	1.15789	61.6253	1.16368	0.0021178	0.758433	3.39127	3.75766
E8 WT T0 controle du 031023 C9 - x40-4	2.95717	0.117766	0.146277	8.49141	0.304027	4.69266	2.21996	1.54325	1.00227	4.15625	0.806061	0.0128333	0.475	1.22222	65.5306	1.14164	0.00216654	0.335491	1.12612	2.85298
E8 WT T0 controle du 031023 C9 - x40-5	2.5472	0.188802	0.292643	5.29655	0.317008	3.17089	1.50866	1.21269	1.06329	2.80749	0.73736	0.00791111	0.148333	5.5	24.3219	1.07336	0.0013055	0.0838002	1.62742	1.94914
E8 WT T0 controle du 031023 C9 - x40-6	2.23182	0.271454	0.17875	3.68386	0.547619	2.31452	4.07609	2.72634	0.849019	3.16379	0.759834	0.00536667	0.06	0.666667	11.5123	1.00149	0.000935179	0.305234	1.15888	10.03
E8 WT T0 controle du 031023 C9 - x40-7	2.00465	0.352599	0.562438	2.83608	0.665966	2.29487	2.81511	2.05141	0.991548	1.28058	0.561514	0.00352222	0	0	2.47753	0.958063	0.0006114	0	1.65568	4.88798
E8 WT T0 controle du 031023 C9 - x40-8	2.60075	0.177513	0.308324	5.63338	0.390918	3.7973	1.87616	1.50773	1.07811	2.77143	0.734848	0.0088	0.256667	1.14286	30.8522	1.08483	0.00156046	0.445233	2.70779	2.70927
E8 WT T0 controle du 031023 C9 - x40-9	2.76687	0.146612	0.102229	6.82072	0.439791	4.36612	3.39233	2.48454	0.965255	4.46	0.81685	0.0121333	0.705	0.619048	58.278	1.13312	0.00205032	0.956949	5.87398	8.39694

## Sheet: input_MorphoCellSorter
microglia	PerimeterAreaRatio	ModifiedCircularity	RoundnessFactor	RamificationIndex	Solidity	Convexity	ConvexHullRadiiRatio	SpanRatio	ConvexHullCircularity	ProcessesSomaAreasRatio	ProcessesCellAreasRatio	Density	BranchingIndex	EndpointsBranchpointsRatio	SkeletonProcessesRatio	FractalDimension	LacunaritySlope	PolarizationIndex	Linearity	Inertia
E1 WT NT x40-1-1	2.57928	5.49583	6.89839	5.49583	3.67778	2.45729	0.144961	0.144961	0.857462	2.51955	0.715873	0.007	0.213333	3.33333	34.6452	1.0688	0.00112414	0.290047	4.17481	8.3242
E1 WT NT x40-1-2	3.04461	9.39078	18.0549	9.39078	6.58203	3.45217	0.0553866	0.0553866	0.943128	6.11111	0.859375	0.0142222	1.175	4	74.36	1.17123	0.00209745	0.291815	1.02567	3.13714
E1 WT NT x40-1-3	2.86045	7.59664	11.4123	7.59664	3.67216	4.12639	0.0876249	0.0876249	1.0409	6.07917	0.85874	0.0188778	0.975	1.36842	84.4421	1.21076	0.00335033	0.594758	4.06694	4.99877
E1 WT NT x40-1-4	3.31214	12.778	9.87082	12.778	4.36244	5.39954	0.101309	0.101309	0.882589	5.76427	0.852164	0.0302889	1.40167	0.733333	240.854	1.32246	0.0051473	0.387819	1.56455	4.12137
E1 WT NT x40-1-5	2.70999	6.3884	5.04987	6.3884	2.93009	3.51304	0.198025	0.198025	0.941307	3.05414	0.753339	0.0141444	0.4	1.4375	69.9489	1.15975	0.0025658	0.231121	1.00613	6.10872
E1 WT NT x40-1-6	2.75606	6.73632	21.6963	6.73632	4.82039	2.39948	0.0460908	0.0460908	0.782053	4.67164	0.823684	0.0168889	0.808333	0.727273	74.7891	1.21344	0.00279357	0.48191	1.87946	14.2948
E1 WT NT x40-10-1	2.66471	6.06384	4.71526	6.06384	2.98879	3.52747	0.212077	0.212077	1.00569	3.01802	0.751121	0.00991111	0.173333	0.888889	37.2597	1.10616	0.0017017	0.450461	2.32035	2.33988
E1 WT NT x40-10-10	2.82985	7.33364	5.95817	7.33364	3.90753	3.66087	0.167837	0.167837	0.98677	3.03462	0.752145	0.0116556	0.311667	2.57143	45.2738	1.1348	0.00193145	0.174658	2.41733	3.43846
E1 WT NT x40-10-11	2.77617	6.89415	5.74446	6.89415	3.44166	3.37768	0.174081	0.174081	0.908913	4.05854	0.802314	0.0115222	0.261667	1.5	39.8125	1.11212	0.00194248	0.486064	1.70325	2.44344
E1 WT NT x40-10-12	2.99837	8.90391	9.83387	8.90391	5.17643	3.71384	0.101689	0.101689	0.94898	4.83333	0.828571	0.0155556	0.625	1.875	82.8448	1.18308	0.00249076	0.481812	1.46512	2.60638
E1 WT NT x40-10-2	2.87243	7.70207	5.28744	7.70207	3.66313	3.9668	0.189128	0.189128	0.985733	2.16796	0.684339	0.0136222	0.303333	0.714286	72.1287	1.14884	0.0023211	0.0807792	1.40948	5.54666
E1 WT NT x40-10-3	2.6493	5.95721	3.3373	5.95721	2.76667	3.59585	0.299644	0.299644	1.00401	1.94278	0.660185	0.012	0.148333	2.5	29.4881	1.15696	0.00220321	0.109713	2.79151	3.88279
E1 WT NT x40-10-4	2.27253	3.86063	1.15441	3.86063	2.11647	2.75172	0.866241	0.866241	1.03694	1.02381	0.505882	0.00944444	0.025	0	7.29302	1.11239	0.00191638	0.0970143	1.31371	2.01344
E1 WT NT x40-10-5	2.91055	8.04768	8.50054	8.04768	4.22888	4.11152	0.11764	0.11764	1.05062	2.93455	0.745842	0.0167	1.09833	1.8	60.3033	1.21188	0.00282524	0.620132	4.59049	4.64834
E1 WT NT x40-10-6	2.96265	8.54517	4.58651	8.54517	4.03302	4.26639	0.218031	0.218031	1.00266	3.18794	0.761219	0.0131222	0.208333	1.45455	70.6385	1.16957	0.0021882	0.0650669	1.23988	2.51
E1 WT NT x40-10-7	2.63188	5.83896	7.64264	5.83896	3.64932	2.94	0.130845	0.130845	0.961873	3.36216	0.770756	0.00896667	0.223333	3.33333	26.3408	1.09558	0.00153486	0.205259	7.16481	7.84097
E1 WT NT x40-10-8	1.74909	2.11319	0.581058	2.11319	1.19746	2.22785	1.721	1.721	1.15366	0.42268	0.297101	0.00613333	0	0	1.03049	1.05514	0.00128597	0	2.35141	2.38188
E1 WT NT x40-10-9	3.08595	9.84845	10.2642	9.84845	4.50476	4.28779	0.0974259	0.0974259	0.924063	4.7767	0.826891	0.0198333	0.931667	1.52941	99.9024	1.23638	0.00318023	0.184861	3.18019	3.22435
E1 WT NT x40-11-1	2.50207	5.02838	3.89358	5.02838	2.63608	3.27536	0.256833	0.256833	1.05757	3.23026	0.763608	0.00714444	0.188333	1.66667	23.7556	1.03777	0.00124672	0.601967	2.80716	2.80897
E1 WT NT x40-11-2	2.82966	7.33202	11.2827	7.33202	5.08192	3.1558	0.0886315	0.0886315	0.970286	6.53691	0.86732	0.0124778	0.25	1.42857	51.5154	1.13552	0.00203531	0.295409	1.63693	1.64667
E1 WT NT x40-11-3	3.05169	9.46761	21.8508	9.46761	5.67167	3.92683	0.045765	0.045765	0.987773	8.70833	0.896996	0.0207111	2.04	1.11111	109.048	1.2307	0.00332658	0.854488	2.74972	2.80543
E1 WT NT x40-11-4	3.24199	11.7866	27.5647	11.7866	5.93515	4.84615	0.0362782	0.0362782	1.00167	11.6623	0.921025	0.0212444	1.775	1.02703	174.285	1.25731	0.00313944	0.513927	1.37356	3.63203
E1 WT NT x40-11-5	2.70165	6.32736	3.1514	6.32736	3.04361	3.42259	0.31732	0.31732	0.943686	2.94659	0.746617	0.0147778	0.401667	3	38.2931	1.15525	0.00277339	0.279635	1.43524	1.44803
E1 WT NT x40-11-6	2.59134	5.57267	2.15373	5.57267	2.42297	3.54011	0.46431	0.46431	0.988844	2.31268	0.69813	0.0124778	0.186667	1.75	47.5115	1.12942	0.00233437	0.123037	1.51171	1.83221
E1 WT NT x40-11-7	3.23887	11.7444	15.8134	11.7444	6.13782	4.93897	0.0632373	0.0632373	1.04187	6.48974	0.866484	0.0283778	1.48667	1.58333	191.505	1.3023	0.0044104	0.11538	2.28155	3.21087
E1 WT NT x40-11-8	2.38917	4.41548	4.32041	4.41548	2.402	2.99145	0.23146	0.23146	1.05	1.85714	0.65	0.00555556	0.115	2	9.99692	1.01065	0.000948504	0.340588	7.21085	7.29878
E1 WT NT x40-2-1	2.74736	6.66925	6.1271	6.66925	3.33535	3.98396	0.163209	0.163209	1.09096	3.8439	0.793555	0.0110333	0.151667	1.71429	50.2551	1.11621	0.00190018	0.241679	3.56405	4.27513
E1 WT NT x40-2-2	2.95578	8.47787	8.58642	8.47787	3.64217	4.20992	0.116463	0.116463	0.947692	4.85652	0.82925	0.0149667	0.778333	1.0625	84.9275	1.16882	0.00252968	0.463997	2.03597	3.61819
E1 WT NT x40-2-3	2.715	6.42535	5.78194	6.42535	3.17565	3.605	0.172952	0.172952	0.999827	4.62921	0.822355	0.0111333	0.255	1.6	35.9029	1.13017	0.00197333	0.130254	1.90673	1.92523
E1 WT NT x40-2-4	2.54415	5.27802	5.43459	5.27802	2.48856	3.24841	0.184006	0.184006	0.970898	1.79323	0.641992	0.00825556	0.258333	1.33333	23.5556	1.07139	0.00142466	0.7383	7.70205	12.4842
E1 WT NT x40-2-5	2.27595	3.87588	4.37973	3.87588	1.94301	2.60839	0.228324	0.228324	0.938081	3.09444	0.755767	0.00818889	0.138333	1.33333	10.6445	1.07644	0.00157048	0.449634	3.99388	6.64477
E1 WT NT x40-2-6	2.86232	7.61298	6.08148	7.61298	3.64475	4.27354	0.164434	0.164434	1.07168	3.43772	0.774659	0.0138556	0.6	1.83333	50.56	1.1595	0.0023831	0.261082	1.44511	3.10241
E1 WT NT x40-2-7	2.7544	6.72346	18.67	6.72346	5.36552	2.625	0.053562	0.053562	0.904362	6.13115	0.85977	0.0145	0.661667	0.9375	57.9545	1.16415	0.00247922	0.39148	5.69279	5.82074
E1 WT NT x40-2-8	2.49393	4.98153	3.92904	4.98153	2.36449	3.01099	0.254515	0.254515	0.929427	2.24242	0.691589	0.0107	0.158333	0.8	21.2628	1.10667	0.00205777	0.0966736	6.26049	6.90451
E1 WT NT x40-3-1	2.96129	8.53181	5.21145	8.53181	4.07551	4.52227	0.191885	0.191885	1.07006	2.83146	0.739003	0.0151556	0.443333	1.44444	77.7778	1.18667	0.00247508	0.488129	1.68024	2.54631
E1 WT NT x40-3-2	3.06299	9.59162	14.7382	9.59162	5.95599	3.49535	0.0678508	0.0678508	0.889356	4.12861	0.805015	0.0217111	1.80667	1.52941	102.226	1.25237	0.00358862	0.31428	4.88861	6.10309
E1 WT NT x40-3-3	3.02915	9.22504	23.3548	9.22504	6.9633	3.70783	0.0428178	0.0428178	1.06062	5.5907	0.848271	0.0157444	1.86	1.5	82.5499	1.19011	0.00239285	0.83205	3.07837	3.12185
E1 WT NT x40-3-4	3.24782	11.866	20.4699	11.866	5.94648	4.62599	0.0488522	0.0488522	0.950674	5.03158	0.834206	0.0191	1.55	1.09091	138.093	1.22542	0.002754	0.563067	2.58002	5.19331
E1 WT NT x40-3-5	3.04356	9.37944	8.26417	9.37944	3.85282	4.98524	0.121004	0.121004	1.04327	4.06442	0.802544	0.0183444	0.828333	1.92308	80.7011	1.22246	0.00311598	0.550315	4.35326	5.18615
E1 WT NT x40-3-6	2.89207	7.87826	28.5649	7.87826	6.0513	3.00937	0.035008	0.035008	0.939659	8.28906	0.892347	0.0132111	0.868333	3.75	57.5014	1.15463	0.00200508	0.339445	1.64381	6.17465
E1 WT NT x40-3-7	2.24201	3.72735	1.70702	3.72735	2.33223	2.22603	0.585818	0.585818	0.912044	0.964286	0.490909	0.00672222	0	1	5.38721	1.02318	0.00121558	0.162623	1.25368	2.71557
E1 WT NT x40-3-8	2.04054	2.95575	1.803	2.95575	1.7038	2.33721	0.554632	0.554632	1.03214	0.896907	0.472826	0.00408889	0.02	0	3.88506	0.937276	0.000730902	0.187952	4.11892	5.38785
E1 WT NT x40-4-1	2.39673	4.4541	1.33613	4.4541	1.98054	3.10989	0.748433	0.748433	0.982602	1.1633	0.537743	0.0142778	0.0983333	1.33333	13.6165	1.16176	0.00305014	0.0836893	1.68455	2.32763
E1 WT NT x40-4-10	2.8446	7.45926	5.23204	7.45926	4.39386	3.73841	0.19113	0.19113	1.05054	3.65051	0.78497	0.0202556	0.638333	0.95	97.225	1.24217	0.00362902	0.253338	1.72772	2.1149
E1 WT NT x40-4-11	2.91902	8.12657	18.6834	8.12657	4.6134	3.71246	0.0535235	0.0535235	0.981217	6.4633	0.866011	0.0180778	1.81	1.53846	75.89	1.22677	0.00305375	0.490851	7.20471	7.55198
E1 WT NT x40-4-2	2.94321	8.356	20.0547	8.356	3.63643	4.01799	0.0498635	0.0498635	0.916954	6.56383	0.867792	0.0158	1.47167	1.13636	76.8752	1.19941	0.00259974	0.619082	10.8062	11.0689
E1 WT NT x40-4-3	2.98085	8.72612	6.84912	8.72612	4.8102	4.1324	0.146004	0.146004	1.03864	5.17647	0.838095	0.0163333	0.543333	0.928571	87.858	1.19823	0.00269599	0.334013	1.15531	1.30675
E1 WT NT x40-4-4	2.6357	5.86466	5.82257	5.86466	2.63118	3.48352	0.171745	0.171745	0.963497	3.69697	0.787097	0.0103333	0.451667	0.636364	34.9727	1.09628	0.00179616	0.264372	3.33488	3.58685
E1 WT NT x40-4-5	3.03461	9.28323	12.247	9.28323	6.38698	3.66962	0.0816529	0.0816529	0.999009	3.7953	0.791463	0.0158778	1.46833	0.708333	102.21	1.1837	0.00247531	0.748219	1.8615	2.15268
E1 WT NT x40-4-6	2.2972	3.97188	4.51059	3.97188	2.48381	2.04938	0.2217	0.2217	0.81318	1.35593	0.57554	0.00617778	0.22	1.33333	14.45	1.0297	0.00107444	0.590695	6.72941	14.2354
E1 WT NT x40-4-7	2.66666	6.07751	12.5051	6.07751	3.50346	2.88182	0.0799675	0.0799675	0.887544	2.66949	0.727483	0.00962222	0.823333	5.5	22.4778	1.0978	0.00158149	0.96653	6.30806	14.0687
E1 WT NT x40-4-8	2.73382	6.56608	15.2681	6.56608	5.69674	2.59559	0.0654959	0.0654959	0.943503	4.60976	0.821739	0.0102222	0.71	2.28571	49.7831	1.10873	0.00161693	0.634172	5.49509	6.46133
E1 WT NT x40-4-9	2.89628	7.91656	5.4054	7.91656	3.63399	4.06552	0.185	0.185	0.978975	3.59635	0.782436	0.0196111	0.5	1.30769	72.7654	1.22654	0.00356864	0.285633	2.441	2.53912
E1 WT NT x40-6-1	3.07667	9.74383	17.5067	9.74383	4.56438	4.63127	0.0571209	0.0571209	1.01546	8.43379	0.893998	0.0229556	1.47833	0.724138	117.572	1.27319	0.00378026	0.507924	1.96676	2.69006
E1 WT NT x40-6-2	2.48944	4.95583	2.12755	4.95583	2.59524	3.13235	0.470025	0.470025	1.01822	1.69725	0.629252	0.00653333	0.005	2	16.4432	1.01583	0.00113464	0.170034	2.4191	2.73956
E1 WT NT x40-6-3	2.37547	4.34642	2.15001	4.34642	2.43189	2.94904	0.465114	0.465114	1.05809	1.32134	0.569214	0.0100333	0.135	1	19.4553	1.12375	0.00196698	0.315702	2.59602	4.32745
E1 WT NT x40-6-4	2.59344	5.58619	3.24147	5.58619	2.37108	3.45116	0.308502	0.308502	0.951313	2.53652	0.717236	0.0156	0.371667	0.470588	52.5323	1.18122	0.00308253	0.362996	1.49402	3.25253
E1 WT NT x40-6-5	2.58021	5.50176	2.21005	5.50176	2.30655	3.40476	0.452478	0.452478	0.939867	1.5896	0.613839	0.0149333	0.163333	0.769231	38.4048	1.17798	0.00293661	0.0983495	1.5208	3.54416
E1 WT NT x40-6-6	2.88516	7.81582	6.34786	7.81582	4.04484	4.23506	0.157534	0.157534	1.08977	5.13333	0.836957	0.0163556	0.481667	1.09091	66.858	1.18115	0.00274735	0.261943	1.21272	1.33771
E1 WT NT x40-6-7	2.63575	5.86502	3.81319	5.86502	4.44867	2.86275	0.262247	0.262247	1.0295	1.89011	0.653992	0.00876667	0.193333	2	36.374	1.09451	0.00140228	0.495864	1.40345	1.54937
E1 WT NT x40-6-8	2.52521	5.16419	2.42191	5.16419	2.54506	3.14286	0.412897	0.412897	0.970895	1.46127	0.593705	0.00776667	0.0216667	1	32.4241	1.04621	0.00142647	0.342506	1.4901	4.3791
E1 WT NT x40-6-9	2.53567	5.22673	8.36072	5.22673	3.51818	2.60109	0.119607	0.119607	0.933437	3.58333	0.781818	0.00733333	0.171667	2	20.5601	1.03038	0.0012075	0.334845	1.80701	5.24928
E1 WT NT x40-7-1	3.04152	9.35736	15.0188	9.35736	4.90111	3.62248	0.0665834	0.0665834	0.857038	5.64815	0.849582	0.0159556	0.873333	1.72222	92.5377	1.20185	0.0024903	0.259901	1.34326	5.08604
E1 WT NT x40-7-10	2.83462	7.37404	14.5042	7.37404	5.42144	3.48372	0.0689454	0.0689454	1.10001	5.41406	0.844093	0.00912222	0.471667	2.16667	61.8312	1.09058	0.0012163	0.551821	2.7092	2.92475
E1 WT NT x40-7-11	2.91266	8.06722	36.8866	8.06722	6.19621	2.92676	0.0271101	0.0271101	0.903081	8.29577	0.892424	0.0146667	0.956667	1.15385	74.3769	1.16574	0.00222125	0.43082	4.06113	8.37703
E1 WT NT x40-7-2	2.88161	7.78392	32.8735	7.78392	5.20809	2.77813	0.0304196	0.0304196	0.814504	7.304	0.879576	0.0115333	0.833333	1.54545	66.8226	1.14506	0.00173043	0.305694	1.99327	16.7756
E1 WT NT x40-7-3	2.8887	7.84771	6.76295	7.84771	5.31194	3.35628	0.147864	0.147864	0.985691	2.87773	0.742117	0.00986667	0.296667	2.5	65.0212	1.11743	0.00151561	0.142374	1.86686	3.02282
E1 WT NT x40-7-4	2.93212	8.25004	11.1909	8.25004	3.84608	3.55039	0.0893585	0.0893585	0.843973	3.64929	0.784913	0.0109	0.646667	1.8	65.1636	1.15725	0.00172164	0.194208	1.36741	9.66201
E1 WT NT x40-7-5	2.75941	6.7624	5.33566	6.7624	5.18845	2.99615	0.187418	0.187418	1.00921	3.03053	0.751894	0.0117333	0.491667	1.6	49.3753	1.13801	0.00191118	0.165717	1.36835	1.41612
E1 WT NT x40-7-6	2.72267	6.48229	9.63146	6.48229	3.8627	3.1581	0.103826	0.103826	0.957509	2.91262	0.744417	0.0134333	0.758333	1.71429	48.0711	1.15684	0.0022603	0.327913	7.23886	8.05552
E1 WT NT x40-7-7	2.74129	6.62276	9.51756	6.62276	3.57992	3.63285	0.105069	0.105069	1.03787	8	0.888889	0.0114	0.425	2.66667	32.0625	1.13876	0.00197165	0.139618	1.76925	2.28756
E1 WT NT x40-7-8	3.16773	10.8208	44.8044	10.8208	6.59128	4.02685	0.0223192	0.0223192	0.955413	10.4688	0.912807	0.0244667	2.73667	1.42308	118.48	1.22424	0.0038894	0.70292	4.31585	10.3263
E1 WT NT x40-7-9	2.8675	7.65853	5.96671	7.65853	3.76939	3.93487	0.167597	0.167597	0.997516	4.5251	0.819008	0.0159	0.515	1.61538	54.6152	1.20511	0.00278608	0.319416	1.27308	2.03569
E1 WT NT x40-8-1	3.0004	8.92478	11.7886	8.92478	5.60041	4.11799	0.0848277	0.0848277	1.09194	5.85563	0.854135	0.0216333	1.42667	1.4375	90.9928	1.24484	0.00355125	0.641006	1.29831	2.05971
E1 WT NT x40-8-10	2.26318	3.81933	6.06637	3.81933	2.26242	2.22703	0.164843	0.164843	0.877052	2.06623	0.673866	0.0102889	0.43	1	14.4631	1.10395	0.0019313	0.617422	9.03613	16.474
E1 WT NT x40-8-11	2.55449	5.34122	7.41151	5.34122	3.5875	2.64641	0.134925	0.134925	0.938453	3.26667	0.765625	0.00711111	0.111667	1.375	31.3796	1.07785	0.00112186	0.142522	1.53393	6.03874
E1 WT NT x40-8-2	2.75942	6.76247	19.2773	6.76247	8.35564	2.10836	0.0518744	0.0518744	0.901216	3.01493	0.750929	0.00896667	0.818333	1.11111	57.0891	1.07573	0.001301	0.896088	21.2852	23.0944
E1 WT NT x40-8-3	2.52212	5.1458	1.32606	5.1458	2.39632	3.4881	0.754115	0.754115	1.04932	1.58	0.612403	0.0114667	0.123333	2.42857	40.5063	1.13711	0.00219009	0.220113	1.37784	1.40252
E1 WT NT x40-8-5	2.58537	5.53453	6.34619	5.53453	2.95953	3.10286	0.157575	0.157575	0.964479	2.52995	0.71671	0.00851111	0.155	0.875	30.3115	1.11137	0.00140443	0.210681	7.3908	7.72611
E1 WT NT x40-8-6	2.43006	4.62831	5.39489	4.62831	2.32191	2.97203	0.185361	0.185361	0.978482	3.79286	0.791356	0.00745556	0.203333	0.857143	26.2222	1.074	0.0013095	0.588007	2.84991	4.68009
E1 WT NT x40-8-7	2.75842	6.75472	4.17947	6.75472	3.92336	3.71698	0.239265	0.239265	1.08996	2.34259	0.700831	0.0120333	0.401667	1.375	38.9776	1.14463	0.00207911	0.354369	1.15567	2.13107
E1 WT NT x40-8-8	2.49619	4.99446	1.71149	4.99446	4.18962	2.45116	0.584286	0.584286	1.00455	1.2602	0.557562	0.00984444	0.141667	3.5	20.6498	1.08553	0.00188971	0.167978	1.60856	1.70688
E1 WT NT x40-8-9	2.74234	6.63082	4.40588	6.63082	3.7074	3.27917	0.22697	0.22697	0.952207	3.87391	0.794826	0.0124556	0.306667	1.45455	41.8058	1.14699	0.00223552	0.181676	1.06855	1.42317
E1 WT NT x40-9-1	2.91712	8.10881	10.037	8.10881	6.12488	3.01294	0.0996316	0.0996316	0.919566	2.56803	0.719733	0.0116556	0.7	7	44.8424	1.12844	0.00187566	0.373069	2.57865	2.90716
E1 WT NT x40-9-10	2.573	5.45627	7.74168	5.45627	2.86528	3.14545	0.129171	0.129171	0.975822	4.14286	0.805556	0.008	0.325	1.6	33.3121	1.06414	0.00133299	0.589256	4.66194	4.92562
E1 WT NT x40-9-11	2.96277	8.54637	5.57414	8.54637	4.37045	4.11355	0.1794	0.1794	1.00623	4.08889	0.803493	0.0152667	0.276667	1.26667	76.1775	1.17653	0.00261807	0.196401	2.44776	2.6558
E1 WT NT x40-9-2	2.71626	6.43469	32.0787	6.43469	5.45315	2.68203	0.0311733	0.0311733	0.973328	8.57353	0.895545	0.00723333	0.755	1.8	42.8199	1.05302	0.00103591	1.10647	4.70494	5.94567
E1 WT NT x40-9-3	2.38893	4.41429	1.35324	4.41429	2.67556	2.73714	0.738969	0.738969	1.01425	1.11036	0.526147	0.0104111	0.0733333	1.6	24.5436	1.11052	0.00202817	0.0326686	2.21499	2.30035
E1 WT NT x40-9-4	2.54209	5.26553	6.96162	5.26553	2.72093	3.17098	0.143645	0.143645	0.993369	4	0.8	0.0119444	0.455	0.625	30.8942	1.11825	0.00219314	0.496499	5.3854	5.41876
E1 WT NT x40-9-5	2.29786	3.97491	9.1115	3.97491	2.41608	1.73711	0.109751	0.109751	0.679293	1.53097	0.604895	0.00635556	0.433333	0	12.974	1.03372	0.00103978	0.301511	10.5864	40.7557
E1 WT NT x40-9-6	2.54775	5.29992	10.7397	5.29992	3.02081	2.67179	0.0931125	0.0931125	0.876183	3.41954	0.773732	0.00854444	0.363333	2.4	28.4034	1.08252	0.00138571	0.984272	5.16783	10.2474
E1 WT NT x40-9-7	2.04795	2.98107	1.41089	2.98107	1.53488	2.45	0.708772	0.708772	1.0182	0.915842	0.478036	0.0086	0.0266667	2	3.9027	1.07617	0.00178965	0.18328	2.12344	4.5493
E1 WT NT x40-9-8	2.59037	5.56647	3.56663	5.56647	2.632	3.40984	0.280377	0.280377	0.993795	2.33333	0.7	0.0111111	0.14	1.25	27.6014	1.14492	0.00204312	0.141421	2.83466	3.98802
E1 WT NT x40-9-9	2.52187	5.14432	5.63592	5.14432	2.92794	2.78846	0.177433	0.177433	0.927508	3.21481	0.762742	0.00632222	0.09	1.5	25.4032	1.01717	0.00105425	0.335377	2.75048	4.97974
E16 WT T0 controle du 130223 C1 - x40-10	3.07145	9.68545	18.017	9.68545	4.01288	4.49814	0.0555033	0.0555033	0.93034	7.74648	0.885668	0.0138	0.643333	0.884615	100.808	1.17751	0.00208055	0.292141	4.1144	6.07007
E16 WT T0 controle du 130223 C1 - x40-11	1.98936	2.78662	1.45815	2.78662	1.43939	2.24194	0.685802	0.685802	0.965241	0.455882	0.313131	0.0022	0.015	0	3.62903	0.86493	0.000352841	0.256235	9.18656	9.45132
E16 WT T0 controle du 130223 C1 - x40-2	2.97763	8.69379	26.9748	8.69379	5.25183	3.28022	0.0370716	0.0370716	0.864668	6.9418	0.874084	0.0166778	1.14667	1.125	108.905	1.20777	0.00258657	0.347255	11.8559	12.7549
E16 WT T0 controle du 130223 C1 - x40-3	2.72645	6.51057	10.1526	6.51057	3.30836	3.34066	0.0984969	0.0984969	0.933296	2.81319	0.737752	0.00771111	0.686667	2	36.6582	1.04548	0.00120526	0.832516	6.92094	9.18446
E16 WT T0 controle du 130223 C1 - x40-4	2.75558	6.73266	3.85237	6.73266	3.42273	3.57576	0.259581	0.259581	0.982578	2.72881	0.731818	0.00977778	0.225	1.875	42.7888	1.0894	0.00168302	0.226134	1.57269	2.59965
E16 WT T0 controle du 130223 C1 - x40-5	2.74172	6.62603	13.2313	6.62603	4.81604	2.80328	0.0755781	0.0755781	0.928449	4.17073	0.806604	0.00942222	0.281667	0.666667	48.4269	1.09358	0.00143298	0.123815	4.90348	5.26947
E16 WT T0 controle du 130223 C1 - x40-6	2.82268	7.2734	11.8712	7.2734	4.48028	3.24893	0.0842377	0.0842377	0.945486	6.36752	0.864269	0.00957778	0.526667	1.5	49.4819	1.09941	0.00140679	0.538538	1.71958	2.13558
E16 WT T0 controle du 130223 C1 - x40-7	3.04901	9.43847	13.4179	9.43847	4.73422	4.22801	0.0745274	0.0745274	0.974673	7.0914	0.876412	0.0167222	0.805	0.785714	120.698	1.204	0.0025605	0.0729083	2.17284	2.53387
E16 WT T0 controle du 130223 C1 - x40-8	2.57009	5.43799	6.19364	5.43799	2.8061	3.05926	0.161456	0.161456	0.942387	2.47727	0.712418	0.0051	0.235	1.16667	22.6177	1.01268	0.000765647	0.776844	3.69381	6.13706
E16 WT T0 controle du 130223 C1 - x40-9	2.79603	7.05355	5.08612	7.05355	3.57939	3.87283	0.196613	0.196613	1.03878	2.9235	0.745125	0.00797778	0.275	1	57.243	1.06569	0.00122078	0.412209	1.46408	2.62176
E16 WT T0 controle du 130223 C10 - x40-10	3.06306	9.59231	21.6249	9.59231	5.00588	3.75449	0.046243	0.046243	0.875726	5.97436	0.856618	0.0151111	1.21333	1.41667	86.8017	1.20312	0.00226148	0.553066	1.91796	6.69395
E16 WT T0 controle du 130223 C10 - x40-2	2.90169	7.96601	5.17373	7.96601	4.14896	3.71825	0.193284	0.193284	0.950752	3.70513	0.787466	0.0122333	0.611667	2.5	54.8143	1.14075	0.0019526	0.242976	1.41537	1.70947
E16 WT T0 controle du 130223 C10 - x40-3	2.76595	6.81351	17.0517	6.81351	5.59091	2.47768	0.0586452	0.0586452	0.859835	2.96992	0.748106	0.00586667	0.33	8.5	15.0101	1.01724	0.00080422	0.350865	7.46212	16.6848
E16 WT T0 controle du 130223 C10 - x40-4	2.86127	7.60375	18.8902	7.60375	5.89107	3.25352	0.0529376	0.0529376	1.03854	3.78986	0.791225	0.00734444	1.04667	4	47.7323	1.07083	0.000989045	1.37846	4.60128	5.37405
E16 WT T0 controle du 130223 C10 - x40-5	2.98073	8.72486	30.9205	8.72486	6.1025	3.46488	0.032341	0.032341	0.981034	8.50847	0.894831	0.0124667	1.22833	0.923077	76.9761	1.14354	0.00190792	0.764637	7.88271	8.05678
E16 WT T0 controle du 130223 C10 - x40-6	2.61127	5.70204	2.69847	5.70204	3.38235	2.92053	0.370581	0.370581	0.941978	1.65922	0.62395	0.00528889	0.103333	2	30.3872	1.01678	0.000803978	0.369533	1.06718	1.54621
E16 WT T0 controle du 130223 C10 - x40-7	2.56987	5.43662	2.48168	5.43662	2.40355	3.29878	0.402953	0.402953	0.9407	2.33898	0.700508	0.00875556	0.115	0.692308	44.654	1.11453	0.00158671	0.287206	1.51821	2.67514
E16 WT T0 controle du 130223 C10 - x40-8	2.21929	3.63112	3.28749	3.63112	1.97106	2.29293	0.304183	0.304183	0.886543	1.61345	0.617363	0.00345556	0.0583333	4	11.0208	0.915643	0.000556929	0.484486	2.27701	9.0245
E16 WT T0 controle du 130223 C10 - x40-9	2.17286	3.44212	0.5256	3.44212	1.58207	2.98095	1.90259	1.90259	1.08928	0.551887	0.355623	0.00731111	0.00666667	1	12.4615	1.05602	0.00147963	0.110264	1.00297	1.11532
E16 WT T0 controle du 130223 C2 - x40-10	2.75433	6.72292	5.44964	6.72292	2.9239	3.72195	0.183498	0.183498	0.946661	3.06746	0.754146	0.0113889	0.243333	1.5	51.2303	1.1612	0.00197493	0.227392	1.65879	5.80569
E16 WT T0 controle du 130223 C2 - x40-11	2.9378	8.30417	7.5781	8.30417	2.69006	5	0.131959	0.131959	0.987541	6.94928	0.874202	0.0121889	0.475	1.05882	66.7456	1.15453	0.00200621	0.486837	1.00402	2.75189
E16 WT T0 controle du 130223 C2 - x40-12	2.42092	4.57987	2.77796	4.57987	3.12418	2.34711	0.359976	0.359976	0.905834	1.125	0.529412	0.0034	0.0233333	2.5	13.6358	0.934334	0.000492933	0.347728	2.78853	3.40488
E16 WT T0 controle du 130223 C2 - x40-13	1.87331	2.4381	0.657097	2.4381	1.2602	2.42	1.52184	1.52184	1.11425	0.661017	0.397959	0.00217778	0	2	1.28205	0.864673	0.000371365	0	1.1807	1.8314
E16 WT T0 controle du 130223 C2 - x40-2	3.02316	9.16173	13.6057	9.16173	4.64322	4.31518	0.0734986	0.0734986	1.01492	7.57353	0.883362	0.0129556	0.661667	1.04762	104.45	1.18523	0.00184154	0.393994	1.39405	2.33038
E16 WT T0 controle du 130223 C2 - x40-3	2.97107	8.62836	2.60548	8.62836	2.53102	5.72083	0.383807	0.383807	1.05482	3.92665	0.797022	0.0223889	0.171667	0.705882	134.636	1.26391	0.00440204	0.157524	1.29461	1.30667
E16 WT T0 controle du 130223 C2 - x40-4	2.39296	4.43482	1.69506	4.43482	2.17347	3.13514	0.589948	0.589948	1.04221	0.921569	0.479592	0.00544444	0.00666667	0.75	23.3021	1.01307	0.000949217	0.142857	3.31013	4.37719
E16 WT T0 controle du 130223 C2 - x40-5	2.84964	7.5027	16.1511	7.5027	3.42857	3.75829	0.0619153	0.0619153	0.927534	5.78626	0.852643	0.00987778	0.94	1.5	56.529	1.11685	0.0015685	0.859016	13.3794	13.4299
E16 WT T0 controle du 130223 C2 - x40-6	3.14107	10.4938	31.1943	10.4938	4.643	5.15273	0.0320572	0.0320572	1.05805	12.4352	0.925569	0.0161222	1.10667	1.22222	120.331	1.19447	0.00247169	0.371263	4.09395	4.09979
E16 WT T0 controle du 130223 C2 - x40-7	2.92072	8.14248	9.84816	8.14248	4.15528	4.17672	0.101542	0.101542	1.04563	6.82639	0.872227	0.0125222	0.281667	1.76923	68.7691	1.15076	0.00200824	0.210631	2.51228	2.54412
E16 WT T0 controle du 130223 C2 - x40-8	2.48574	4.93473	2.85745	4.93473	1.83372	3.85714	0.349962	0.349962	1.05845	3.19512	0.761628	0.00955556	0.198333	0.818182	40.5634	1.12086	0.00181461	0.314384	2.29477	2.9935
E16 WT T0 controle du 130223 C2 - x40-9	2.70967	6.386	3.19846	6.386	2.49597	4.34756	0.312651	0.312651	1.07556	3.50909	0.778226	0.0110222	0.215	0.692308	48.7513	1.12948	0.00202543	0.319084	2.4014	2.41049
E16 WT T0 controle du 130223 C3 - x40-2	3.07134	9.68421	9.71905	9.68421	5.02649	4.75312	0.102891	0.102891	1.10039	6.52107	0.86704	0.0218111	1.37667	1.58824	99.7321	1.25458	0.00363933	0.507207	1.2999	1.37257
E16 WT T0 controle du 130223 C3 - x40-3	2.91215	8.06251	13.4675	8.06251	4.40867	4.25792	0.0742526	0.0742526	1.10887	6.6338	0.869004	0.0120444	0.511667	1.08333	79.1178	1.14262	0.00187436	0.455593	2.09276	2.64653
E16 WT T0 controle du 130223 C3 - x40-4	2.10649	3.18888	0.470405	3.18888	1.32158	2.92233	2.12583	2.12583	1.05351	0.528017	0.345557	0.00787778	0	2	6.53061	1.10664	0.00167074	0.0839773	1.01938	1.10346
E16 WT T0 controle du 130223 C3 - x40-5	2.54363	5.27483	2.13054	5.27483	2.35159	3.46626	0.469365	0.469365	1.0077	2.6087	0.722892	0.0101444	0.116667	0.5	42.2561	1.14014	0.00188222	0.284695	1.64153	1.74817
E16 WT T0 controle du 130223 C3 - x40-6	2.4841	4.92544	5.26378	4.92544	2.65528	2.90604	0.189977	0.189977	0.961417	3.52206	0.778862	0.00683333	0.126667	0.818182	30.5658	1.03624	0.00114474	0.0570266	2.71238	3.48428
E16 WT T0 controle du 130223 C3 - x40-7	2.72881	6.52831	17.8948	6.52831	4.77934	2.74648	0.0558821	0.0558821	0.919729	4.65487	0.823161	0.0071	0.401667	1.8	41.6426	1.04364	0.00102594	0.474713	1.21785	7.85559
E16 WT T0 controle du 130223 C3 - x40-8	2.67102	6.10808	6.32743	6.10808	2.69664	3.43605	0.158042	0.158042	0.923776	4.03378	0.801342	0.00827778	0.213333	1.33333	31.4389	1.10135	0.00139817	0.234592	2.51334	4.16055
E16 WT T0 controle du 130223 C4 - x40-10	2.26597	3.83159	11.5162	3.83159	2.36682	1.89865	0.0868341	0.0868341	0.762339	2.45161	0.71028	0.00475556	0.141667	0	10.3158	0.992608	0.000742818	0.41299	16.5163	26.751
E16 WT T0 controle du 130223 C4 - x40-11	2.67872	6.16249	35.3298	6.16249	4.55473	2.63855	0.0283047	0.0283047	0.913779	9.86486	0.90796	0.00446667	0.383333	1.5	46.3014	1.0079	0.000557892	0.749793	2.38675	8.52483
E16 WT T0 controle du 130223 C4 - x40-12	2.84751	7.48424	9.64283	7.48424	3.98745	3.58373	0.103704	0.103704	0.956171	5.64167	0.849435	0.00885556	0.345	0.933333	60.87	1.09516	0.00134623	0.602171	1.48782	2.71106
E16 WT T0 controle du 130223 C4 - x40-2	3.30295	12.6435	8.73825	12.6435	5.5942	5.27169	0.114439	0.114439	0.986166	5.04556	0.834589	0.0294889	1.82833	1.35897	206.31	1.31597	0.00482813	0.419926	2.06049	2.63054
E16 WT T0 controle du 130223 C4 - x40-3	2.96364	8.55495	18.9902	8.55495	5.38414	3.56604	0.0526587	0.0526587	0.967224	4.99383	0.833162	0.0107889	0.856667	1.73333	73.5921	1.13913	0.00157804	0.163635	4.72098	9.024
E16 WT T0 controle du 130223 C4 - x40-4	2.90747	8.01917	12.0718	8.01917	4.89413	3.67544	0.0828379	0.0828379	1.01395	3.77473	0.790564	0.00965556	0.731667	3.2	66.0393	1.1104	0.00133336	0.884595	3.63823	4.73066
E16 WT T0 controle du 130223 C4 - x40-5	2.8377	7.4002	10.2729	7.4002	3.7695	3.68639	0.0973437	0.0973437	0.967163	3.40625	0.77305	0.00626667	0.298333	3.8	44.3142	1.06861	0.000848172	0.397242	4.23084	5.20579
E16 WT T0 controle du 130223 C4 - x40-6	2.67708	6.15083	3.59446	6.15083	3.41997	3.53416	0.278206	0.278206	1.06259	1.76829	0.638767	0.00756667	0.39	1.4	29.354	1.05893	0.00121417	0.407348	1.60381	1.94411
E16 WT T0 controle du 130223 C4 - x40-7	3.05709	9.52664	16.506	9.52664	5.55219	4.05575	0.0605839	0.0605839	1.00314	6.2439	0.861953	0.0132	1.05333	1.6	97.5156	1.18151	0.00186812	0.494073	1.98465	2.97531
E16 WT T0 controle du 130223 C4 - x40-8	2.78919	6.99822	10.3282	6.99822	4.48718	3.03265	0.0968219	0.0968219	0.917956	3.77128	0.790412	0.00996667	0.198333	2.28571	51.9944	1.11913	0.00154474	0.236096	2.35663	7.78813
E16 WT T0 controle du 130223 C4 - x40-9	3.10507	10.0677	12.1449	10.0677	5.2758	4.52768	0.0823388	0.0823388	1.03297	5	0.833333	0.0131333	0.54	2.21429	88.9503	1.15555	0.00190076	0.339204	2.51173	2.79753
E16 WT T0 controle du 130223 C5 - x40-10	2.80777	7.14954	7.18494	7.14954	3.26142	3.9466	0.13918	0.13918	0.996893	6.29787	0.862974	0.0114333	0.541667	1.375	68.1486	1.14896	0.00188301	0.532701	1.1151	2.5226
E16 WT T0 controle du 130223 C5 - x40-11	2.58154	5.51019	4.51946	5.51019	2.43956	3.34054	0.221265	0.221265	0.946904	3.55	0.78022	0.0111222	0.331667	0.470588	48.6876	1.13053	0.0020029	0.429901	3.54518	3.95522
E16 WT T0 controle du 130223 C5 - x40-12	2.61097	5.70009	2.59266	5.70009	2.1092	4.35036	0.385705	0.385705	1.10842	2.55102	0.718391	0.00966667	0.148333	0.7	31.36	1.12592	0.00176162	0.366719	1.95433	2.05663
E16 WT T0 controle du 130223 C5 - x40-13	2.66628	6.07487	6.78148	6.07487	2.9545	3.37755	0.14746	0.14746	0.955667	4.59172	0.821164	0.0105	0.303333	0.642857	40.8299	1.11871	0.00180525	0.416587	1.64092	3.19506
E16 WT T0 controle du 130223 C5 - x40-14	3.13485	10.4189	13.385	10.4189	3.54933	5.97788	0.0747104	0.0747104	1.08093	8.04054	0.889387	0.0148667	1.055	0.958333	108.908	1.20201	0.00228838	0.513641	3.10304	3.70208
E16 WT T0 controle du 130223 C5 - x40-15	1.88248	2.46396	0.993624	2.46396	1.30066	2.05128	1.00642	1.00642	0.949456	0.719818	0.418543	0.00838889	0.0166667	0	10.6456	1.0756	0.00176404	0.150055	2.98534	3.6263
E16 WT T0 controle du 130223 C5 - x40-2	2.93792	8.30528	18.3261	8.30528	7.45423	2.9734	0.054567	0.054567	0.977465	6.4715	0.866158	0.0160222	1.03	2.91667	89.8519	1.20762	0.00231551	0.411351	1.80942	2.02136
E16 WT T0 controle du 130223 C5 - x40-3	2.7139	6.41719	2.2991	6.41719	2.9377	3.55777	0.434952	0.434952	0.950247	2.0275	0.669695	0.0171222	0.416667	1.0625	68.0475	1.19876	0.00330927	0.0569618	1.20292	1.7284
E16 WT T0 controle du 130223 C5 - x40-4	2.57393	5.4621	7.34048	5.4621	3.28964	2.78173	0.136231	0.136231	0.923696	2	0.666667	0.0089	0.293333	1.42857	36.1816	1.09084	0.00149212	0.301888	9.97103	10.8214
E16 WT T0 controle du 130223 C5 - x40-5	2.87599	7.73375	34.4905	7.73375	4.72781	3.1978	0.0289935	0.0289935	0.899065	8.94118	0.899408	0.0112667	0.605	1	48.8169	1.10223	0.00174415	0.228622	6.11669	7.19338
E16 WT T0 controle du 130223 C5 - x40-6	2.57968	5.49839	5.95927	5.49839	2.15508	3.46512	0.167806	0.167806	0.925154	3.49519	0.77754	0.0103889	0.14	0.8	29.3205	1.13102	0.00179381	0.310253	1.19626	5.22023
E16 WT T0 controle du 130223 C5 - x40-7	2.63832	5.88241	2.47321	5.88241	2.33575	3.86316	0.404332	0.404332	1.00369	1.99275	0.66586	0.0137667	0.193333	2	34.2109	1.16068	0.00269874	0.102432	2.42961	3.67761
E16 WT T0 controle du 130223 C5 - x40-8	2.63463	5.85748	3.8197	5.85748	2.68653	3.51124	0.261801	0.261801	0.982529	1.9901	0.665563	0.0100667	0.253333	1.6	29.335	1.09335	0.00179654	0.378798	5.93707	6.27226
E16 WT T0 controle du 130223 C5 - x40-9	2.40556	4.49963	1.58119	4.49963	2.07051	3.01235	0.632434	0.632434	0.963312	1.12727	0.529915	0.0104	0.153333	1.14286	21.8065	1.13613	0.00201258	0.261488	1.09714	2.77033
E16 WT T0 controle du 130223 C6 - x40-10	2.6192	5.75434	3.49469	5.75434	2.70393	3.48352	0.286148	0.286148	0.995452	2.11613	0.679089	0.0107333	0.376667	1.125	34.7576	1.11733	0.00196674	0.523762	1.17643	3.51821
E16 WT T0 controle du 130223 C6 - x40-11	2.47883	4.89566	3.30728	4.89566	2.43662	3.01242	0.302363	0.302363	0.960502	1.10512	0.524968	0.00867778	0.398333	2.2	22.478	1.05606	0.00154467	0.536742	4.81546	6.43524
E16 WT T0 controle du 130223 C6 - x40-12	2.57317	5.45732	6.94867	5.45732	3.83636	2.73077	0.143912	0.143912	0.980089	2.58696	0.721212	0.00733333	0.291667	1.5	33.3529	1.05644	0.00118852	0.58517	1.6232	5.74388
E16 WT T0 controle du 130223 C6 - x40-13	3.08537	9.84196	7.09402	9.84196	4.57509	4.68727	0.140964	0.140964	1.01868	5.69118	0.850549	0.0151667	0.433333	2.13333	83.3084	1.20266	0.00236913	0.245098	1.06018	1.0701
E16 WT T0 controle du 130223 C6 - x40-2	3.22693	11.584	9.99243	11.584	4.97729	5.52055	0.100076	0.100076	1.06321	6.37321	0.864374	0.0171222	0.828333	4.22222	83.25	1.20546	0.00257235	0.382111	1.90894	1.96207
E16 WT T0 controle du 130223 C6 - x40-3	2.8574	7.57003	12.1751	7.57003	5.34926	3.26923	0.0821348	0.0821348	0.998838	5.93714	0.855848	0.0134889	0.741667	1.30769	63.5698	1.1684	0.00212082	0.655103	2.23316	2.3114
E16 WT T0 controle du 130223 C6 - x40-4	2.52865	5.18464	0.857533	5.18464	1.94765	3.62941	1.16614	1.16614	0.976952	1.15488	0.535936	0.0125222	0.0266667	0.928571	45.6225	1.17468	0.00258795	0.0893633	1.29417	1.29947
E16 WT T0 controle du 130223 C6 - x40-5	2.92599	8.19196	8.54163	8.19196	4.46124	3.99569	0.117074	0.117074	1.03022	3.65297	0.785083	0.0113222	0.331667	2.28571	58.8612	1.12644	0.00177165	0.308531	3.13539	3.25728
E16 WT T0 controle du 130223 C6 - x40-6	2.97278	8.64538	28.3329	8.64538	6.56661	3.36129	0.0352947	0.0352947	0.996306	7.19858	0.878028	0.0128444	0.748333	1.88889	69.7103	1.1418	0.00188923	0.502588	1.5382	4.37362
E16 WT T0 controle du 130223 C6 - x40-7	2.87635	7.73697	11.1184	7.73697	4.74929	3.61789	0.0899408	0.0899408	1.01906	5.26786	0.840456	0.0117	0.386667	1.09091	59.774	1.12385	0.00179695	0.290724	2.07296	2.99699
E16 WT T0 controle du 130223 C6 - x40-8	3.2657	12.1128	27.3629	12.1128	7.03273	4.6841	0.0365458	0.0365458	1.02552	10.5212	0.913203	0.0302111	2.455	1.72222	193.415	1.31988	0.00465905	0.672313	1.67499	3.12296
E16 WT T0 controle du 130223 C6 - x40-9	2.36915	4.31489	2.58726	4.31489	2.31899	2.66667	0.386509	0.386509	0.941126	1.40854	0.58481	0.00438889	0.0683333	1.5	23.7056	1.02774	0.000697279	0.405656	2.74247	4.17259
E16 WT T0 controle du 130223 C7 - x40-10	2.82621	7.30302	5.18878	7.30302	3.80684	3.73498	0.192724	0.192724	0.997858	2.08133	0.675465	0.0185222	0.988333	3.44444	55.5062	1.22346	0.00333211	0.489849	5.21064	5.22264
E16 WT T0 controle du 130223 C7 - x40-11	2.92946	8.22481	26.5032	8.22481	3.4975	3.34437	0.0377312	0.0377312	0.760444	8.16031	0.890833	0.0133333	0.795	1.92308	56.6099	1.15286	0.00210722	0.635085	2.25483	18.4772
E16 WT T0 controle du 130223 C7 - x40-12	2.88159	7.78374	5.38163	7.78374	3.19868	4.34842	0.185817	0.185817	0.999145	4.20601	0.807914	0.0134778	0.36	1.28571	52.5806	1.1634	0.00235769	0.162422	2.93944	2.93985
E16 WT T0 controle du 130223 C7 - x40-13	2.54571	5.28749	19.3797	5.28749	3.86595	2.46259	0.0516005	0.0516005	0.915736	3.54878	0.780161	0.00414444	0.268333	4.5	21.4467	0.982441	0.000533437	1.47363	8.36922	17.8867
E16 WT T0 controle du 130223 C7 - x40-2	3.03486	9.28592	11.7924	9.28592	4.17168	4.88983	0.0848004	0.0848004	1.07554	6.92903	0.873881	0.0136556	0.448333	1.35714	76.1601	1.16418	0.00213609	0.222787	2.0586	3.57957
E16 WT T0 controle du 130223 C7 - x40-4	3.11873	10.2272	4.38221	10.2272	3.74476	5.46853	0.228195	0.228195	1.03472	2.81352	0.737775	0.0206778	0.48	1.09091	101.876	1.23724	0.00357957	0.353078	1.07829	2.46126
E16 WT T0 controle du 130223 C7 - x40-5	2.44006	4.68193	3.10523	4.68193	1.9982	3.17886	0.322038	0.322038	0.959767	2.26471	0.693694	0.00616667	0.05	1.2	17.4649	1.0305	0.0010926	0.0949158	1.79253	4.61386
E16 WT T0 controle du 130223 C7 - x40-6	2.42162	4.58356	8.23884	4.58356	2.48299	3.05426	0.121376	0.121376	1.05001	2.92	0.744898	0.00653333	0.36	1.25	15.3516	1.04657	0.0011291	0.85017	14.1503	15.5515
E16 WT T0 controle du 130223 C7 - x40-7	2.73052	6.54118	15.3595	6.54118	4.30732	3.03196	0.0651064	0.0651064	0.961991	4.06173	0.802439	0.00911111	0.503333	2	41.8784	1.07971	0.00137661	0.364591	5.37123	7.30791
E16 WT T0 controle du 130223 C7 - x40-8	2.46766	4.83311	13.1551	4.83311	2.90942	2.51531	0.076016	0.076016	0.887702	5.27273	0.84058	0.0092	0.471667	1.14286	30.6264	1.08437	0.00157699	0.987849	7.32537	10.7409
E16 WT T0 controle du 130223 C7 - x40-9	3.11922	10.2331	50.4897	10.2331	6.96962	3.70175	0.019806	0.019806	0.955008	8.98361	0.899836	0.0135333	1.31833	2.9	75.1542	1.16913	0.0018734	0.183471	8.63795	10.5663
E16 WT T0 controle du 130223 C8 - x40-10	3.02277	9.15752	18.5525	9.15752	6.33812	3.50132	0.053901	0.053901	0.962574	4.90459	0.83064	0.0185667	1.495	2.47059	117.591	1.22223	0.00268009	0.469921	3.43695	5.44792
E16 WT T0 controle du 130223 C8 - x40-11	2.37447	4.34141	4.64791	4.34141	2.49469	2.35211	0.21515	0.21515	0.855728	1.83735	0.647558	0.00523333	0.176667	2.5	28.3574	1.00557	0.000841758	0.379965	3.09486	10.4734
E16 WT T0 controle du 130223 C8 - x40-12	2.53671	5.23297	11.1515	5.23297	3.35973	2.46835	0.0896744	0.0896744	0.864592	2.87719	0.742081	0.00491111	0.271667	3.33333	24.6951	0.983398	0.000706169	0.201802	19.1631	19.1924
E16 WT T0 controle du 130223 C8 - x40-13	2.53758	5.23826	5.90055	5.23826	2.86416	3.03974	0.169476	0.169476	0.98208	2.55233	0.718494	0.00678889	0.228333	1	35.0251	1.04091	0.00109896	0.742667	7.50296	7.57338
E16 WT T0 controle du 130223 C8 - x40-14	2.64039	5.89643	17.1309	5.89643	5.89833	2.12448	0.0583741	0.0583741	0.875041	4.45455	0.816667	0.00666667	0.528333	4.25	35.0224	1.04839	0.000957718	0.248328	1.07787	4.28427
E16 WT T0 controle du 130223 C8 - x40-15	2.81209	7.18523	15.8116	7.18523	4.71323	3.19592	0.0632446	0.0632446	0.965637	5.38514	0.843386	0.0105	0.825	1.45455	65.798	1.11316	0.00154832	0.848279	1.26608	5.98001
E16 WT T0 controle du 130223 C8 - x40-3	2.88966	7.85642	4.87927	7.85642	5.94759	3.3945	0.204949	0.204949	1.05371	1.20625	0.546742	0.00784444	0.01	2.25	52.2383	1.07002	0.000999777	0.438902	1.70992	1.9489
E16 WT T0 controle du 130223 C8 - x40-4	2.64449	5.92435	7.55179	5.92435	3.25978	2.63223	0.132419	0.132419	0.802191	1.69795	0.629348	0.0102222	0.44	1.85714	38.3437	1.11061	0.00175833	0.72831	2.64778	17.3588
E16 WT T0 controle du 130223 C8 - x40-5	2.59907	5.62251	6.4821	5.62251	2.63646	3.10101	0.154271	0.154271	0.895537	3.16228	0.759747	0.0105444	0.481667	0.8	38.2191	1.11707	0.00189824	0.639415	6.52014	7.57258
E16 WT T0 controle du 130223 C8 - x40-6	3.12266	10.2736	38.4278	10.2736	4.75704	4.75556	0.0260228	0.0260228	1.00959	15.5733	0.939662	0.0138111	1.68667	1.47368	89.3228	1.17983	0.00208691	1.19263	1.89929	4.75222
E16 WT T0 controle du 130223 C8 - x40-7	2.48325	4.92061	2.34118	4.92061	2.13798	3.51587	0.427135	0.427135	1.04476	2.4492	0.710078	0.00716667	0.0933333	0.833333	14.3253	1.11719	0.0013056	0.0880451	1.92309	2.07241
E16 WT T0 controle du 130223 C8 - x40-8	2.90809	8.02488	10.2196	8.02488	5.0078	3.44939	0.0978513	0.0978513	0.961895	5.06081	0.835006	0.00996667	0.69	2.30769	62.2911	1.12433	0.00138573	0.907052	1.07775	2.28123
E16 WT T0 controle du 130223 C8 - x40-9	1.95184	2.66878	0.682668	2.66878	1.37845	2.36842	1.46484	1.46484	1.04194	0.560345	0.359116	0.00402222	0.0166667	0	1.3	0.978607	0.000763531	0.117525	1.86155	1.91507
E16 WT T0 controle du 130223 C9 - x40-10	2.76693	6.82119	6.40445	6.82119	4.20788	3.03704	0.156142	0.156142	0.913318	2.4554	0.710598	0.00817778	0.2	1.375	47.13	1.08291	0.00126022	0.132902	4.52547	4.58619
E16 WT T0 controle du 130223 C9 - x40-11	3.11827	10.2218	21.8611	10.2218	5.82005	3.76791	0.0457434	0.0457434	0.889274	5.5198	0.846621	0.0146333	1.09833	1.86667	104.9	1.19816	0.00214723	0.671018	3.07419	8.32207
E16 WT T0 controle du 130223 C9 - x40-12	2.84139	7.43174	19.3187	7.43174	3.64447	3.44144	0.0517634	0.0517634	0.88403	5.27612	0.840666	0.00934444	0.923333	2.25	52.1414	1.10026	0.00137191	1.01417	9.78227	12.5083
E16 WT T0 controle du 130223 C9 - x40-13	3.04027	9.3439	11.2059	9.3439	4.69457	4.1573	0.0892391	0.0892391	0.96401	9.20909	0.902048	0.0124778	0.863333	1.92308	86.4916	1.15212	0.0018175	0.89721	1.00034	1.28854
E16 WT T0 controle du 130223 C9 - x40-14	2.71776	6.44577	4.06331	6.44577	2.25871	4.16751	0.246105	0.246105	0.971701	4.06275	0.802479	0.0143444	0.445	1.125	57.9392	1.18346	0.00272267	0.352044	2.09814	3.06427
E16 WT T0 controle du 130223 C9 - x40-15	2.76642	6.81719	21.162	6.81719	4.50626	2.85463	0.0472544	0.0472544	0.888897	4.752	0.826147	0.00798889	0.495	2	36.3788	1.06874	0.0012023	0.320813	21.2624	21.7108
E16 WT T0 controle du 130223 C9 - x40-16	2.11764	3.23011	1.58921	3.23011	1.53925	2.61333	0.629242	0.629242	1.00376	1.13869	0.532423	0.00325556	0.015	2	5.02564	0.899072	0.000556206	0.240874	1.76317	4.97495
E16 WT T0 controle du 130223 C9 - x40-2	2.95761	8.49572	62.2911	8.49572	5.16414	2.76	0.0160537	0.0160537	0.738257	7.87135	0.887278	0.0168556	3.865	1.21053	85.8841	1.21574	0.00259407	2.00412	1.0783	22.9056
E16 WT T0 controle du 130223 C9 - x40-3	2.63057	5.83017	7.85326	5.83017	3.10593	3.1978	0.127336	0.127336	0.966642	5.72034	0.851198	0.00881111	0.281667	0.875	34.68	1.07658	0.00152386	0.15881	2.90658	3.07922
E16 WT T0 controle du 130223 C9 - x40-4	2.19805	3.5434	1.75908	3.5434	1.96034	2.95	0.568478	0.568478	1.16565	1.17901	0.541076	0.00392222	0.06	2	7.56021	0.995754	0.000658774	0.383808	3.54583	3.63096
E16 WT T0 controle du 130223 C9 - x40-5	2.52166	5.14311	5.99385	5.14311	2.24146	3.08065	0.166838	0.166838	0.896769	3.1028	0.756264	0.00487778	0.09	0.5	21.762	0.995261	0.000762614	0.477274	3.60408	9.90666
E16 WT T0 controle du 130223 C9 - x40-6	2.76094	6.77428	11.5821	6.77428	6.57751	2.40625	0.0863398	0.0863398	0.910979	3.16456	0.759878	0.00731111	0.32	3.5	50.562	1.05651	0.00102077	0.46943	2.48168	4.1409
E16 WT T0 controle du 130223 C9 - x40-7	3.04037	9.34507	10.9151	9.34507	4.2787	4.32046	0.091616	0.091616	0.956322	5.79167	0.852761	0.0126778	0.866667	1.81818	91.2682	1.15591	0.00194135	0.681546	1.10701	4.28445
E16 WT T0 controle du 130223 C9 - x40-8	2.48496	4.9303	9.20548	4.9303	2.45626	2.57317	0.108631	0.108631	0.817961	2.73718	0.732419	0.00647778	0.245	1.14286	28.8548	1.04333	0.00103074	0.984442	6.98615	21.3707
E16 WT T0 controle du 130223 C9 - x40-9	2.94923	8.41419	13.0446	8.41419	4.97174	3.4877	0.0766603	0.0766603	0.924234	3.35294	0.77027	0.00904444	0.23	4	50.5327	1.0981	0.00126686	0.18875	8.84819	10.0712
E17 CRE T0 controle du 130223 C1 - x40-2	3.1698	10.8467	20.5802	10.8467	4.55861	5.5	0.0485905	0.0485905	1.08264	14.1417	0.933957	0.0201889	0.68	1.5	131.838	1.24129	0.00304122	0.326756	1.51584	1.86811
E17 CRE T0 controle du 130223 C1 - x40-3	2.66093	6.03757	8.18608	6.03757	2.35564	3.28649	0.122159	0.122159	0.835457	5.35433	0.842627	0.00896667	0.241667	0.833333	47.1191	1.11308	0.00153054	0.367516	1.04039	5.76305
E17 CRE T0 controle du 130223 C1 - x40-4	2.85247	7.52718	19.4912	7.52718	4.89444	3.27273	0.0513052	0.0513052	0.961898	5.24823	0.839955	0.00978889	0.51	3	50.3365	1.12336	0.00141333	0.87661	1.64213	6.57775
E17 CRE T0 controle du 130223 C1 - x40-5	2.39352	4.43765	2.46097	4.43765	2.18046	3.11409	0.406345	0.406345	1.03622	2.8326	0.73908	0.00966667	0.0666667	0.714286	23.5288	1.09185	0.00181069	0.305129	1.92761	1.93065
E17 CRE T0 controle du 130223 C1 - x40-6	2.91487	8.08777	6.29909	8.08777	3.10996	4.53125	0.158753	0.158753	0.988022	7.39487	0.88088	0.0181889	0.7	1.03571	98.0416	1.20699	0.0033269	0.377271	1.69046	2.03895
E17 CRE T0 controle du 130223 C1 - x40-7	3.02436	9.17432	12.1055	9.17432	3.76931	4.66556	0.0826073	0.0826073	0.987327	6.78838	0.871604	0.0208556	0.79	0.8	109.888	1.24743	0.00367009	0.0692451	3.21692	4.72756
E17 CRE T0 controle du 130223 C10 - x40-10	2.59632	5.60471	4.06516	5.60471	3.80584	2.93785	0.245993	0.245993	1.02259	3.75694	0.789781	0.00761111	0.07	2.2	35.2015	1.06546	0.00124633	0.157536	1.40939	1.4573
E17 CRE T0 controle du 130223 C10 - x40-11	2.87698	7.74261	7.88254	7.74261	3.90039	4.26341	0.126863	0.126863	1.08749	6.24286	0.861933	0.0112667	0.798333	1.08333	69.2403	1.14452	0.00180987	0.54029	1.5858	1.59336
E17 CRE T0 controle du 130223 C10 - x40-12	3.03941	9.33474	17.0233	9.33474	3.22242	5.67876	0.0587429	0.0587429	1.09205	11.4659	0.919781	0.0121889	0.533333	1.04167	87.4222	1.17068	0.00184028	0.664231	1.21123	3.49542
E17 CRE T0 controle du 130223 C10 - x40-13	2.80674	7.14107	23.1418	7.14107	3.865	3.19643	0.0432119	0.0432119	0.879988	6.14286	0.86	0.00888889	0.551667	1.25	58.1395	1.08189	0.00133084	0.610328	6.47823	12.9142
E17 CRE T0 controle du 130223 C10 - x40-14	3.18493	11.0372	13.7425	11.0372	6.9743	4.3676	0.0727667	0.0727667	1.04504	6.82927	0.872274	0.0142667	0.87	2.92857	107.508	1.18428	0.00191832	0.308246	1.03837	1.05845
E17 CRE T0 controle du 130223 C10 - x40-15	2.93256	8.25425	11.2899	8.25425	4.16531	3.62055	0.0885751	0.0885751	0.895202	3.7343	0.788776	0.0108889	0.46	2.85714	59.7995	1.12699	0.00164511	0.451754	5.63833	6.8506
E17 CRE T0 controle du 130223 C10 - x40-2	2.88897	7.85021	13.7863	7.85021	5.89185	3.08974	0.0725358	0.0725358	0.95536	3.35484	0.77037	0.0075	0.303333	4.75	37.1558	1.0663	0.00102877	0.310316	5.38113	5.77035
E17 CRE T0 controle du 130223 C10 - x40-3	3.05868	9.54407	21.4473	9.54407	4.41871	4.5	0.0466259	0.0466259	0.991121	8.5679	0.895484	0.0172222	0.746667	0.851852	122.888	1.20787	0.00268179	0.148106	1.73613	5.16802
E17 CRE T0 controle du 130223 C10 - x40-4	2.48631	4.93797	3.03188	4.93797	2.39928	2.98225	0.329828	0.329828	0.935482	2.22568	0.689988	0.00921111	0.193333	0.923077	43.6434	1.07367	0.00166533	0.104194	2.81914	2.95697
E17 CRE T0 controle du 130223 C10 - x40-5	3.13809	10.4578	15.702	10.4578	5.51154	4.31095	0.0636862	0.0636862	0.967764	5.72671	0.851339	0.0120333	1.17833	2.58333	89.3373	1.1531	0.00166622	0.626441	2.21699	3.01241
E17 CRE T0 controle du 130223 C10 - x40-6	3.11448	10.1773	6.91085	10.1773	4.81597	5.31418	0.1447	0.1447	1.14589	5.71818	0.85115	0.0164222	0.285	1.125	117.215	1.20003	0.00251438	0.0937852	1.01143	1.0713
E17 CRE T0 controle du 130223 C10 - x40-7	2.55045	5.31641	2.3806	5.31641	2.82462	3.47799	0.420062	0.420062	1.09949	2.52869	0.716609	0.00956667	0.146667	0.909091	48.5073	1.10101	0.00167314	0.248105	1.14228	1.26922
E17 CRE T0 controle du 130223 C10 - x40-8	2.91161	8.05745	9.28985	8.05745	4.58206	3.73384	0.107644	0.107644	0.991947	3.59922	0.782572	0.0131333	0.411667	1.6	68.653	1.16188	0.00202147	0.119927	2.65397	4.54208
E17 CRE T0 controle du 130223 C10 - x40-9	2.92292	8.1631	13.802	8.1631	4.21805	3.73745	0.0724532	0.0724532	0.940321	7.47727	0.882038	0.0124333	0.61	1.18182	80.5714	1.16616	0.00187682	0.628487	1.37411	2.22191
E17 CRE T0 controle du 130223 C2 - x40-10	3.01536	9.07981	23.0753	9.07981	6.29175	3.00289	0.0433364	0.0433364	0.829561	4.08293	0.803263	0.0115778	1.225	1.07692	99.0968	1.15064	0.00168836	0.27881	10.916	12.5194
E17 CRE T0 controle du 130223 C2 - x40-11	2.48426	4.92633	6.6545	4.92633	3.5753	2.45902	0.150274	0.150274	0.943831	3.45638	0.775602	0.00737778	0.27	1.5	29.8563	1.04677	0.00122254	0.522102	3.17697	3.65235
E17 CRE T0 controle du 130223 C2 - x40-2	2.92702	8.20175	17.322	8.20175	5.62475	3.96567	0.0577299	0.0577299	1.14673	5.08434	0.835644	0.0112222	0.655	1.42857	68.2464	1.11847	0.00163517	0.389211	4.50129	4.51648
E17 CRE T0 controle du 130223 C2 - x40-3	2.62474	5.79118	3.89739	5.79118	2.6009	3.75177	0.256582	0.256582	1.0448	2.32	0.698795	0.00737778	0.223333	0.9	39.278	1.12822	0.00123123	0.522102	3.65877	3.76033
E17 CRE T0 controle du 130223 C2 - x40-4	2.74492	6.65055	12.6547	6.65055	4.44574	2.6713	0.0790221	0.0790221	0.846909	2.99333	0.749583	0.00665556	0.36	2.25	33.6949	1.04114	0.000966367	0.261625	5.75115	10.8215
E17 CRE T0 controle du 130223 C2 - x40-5	2.95952	8.51445	13.5453	8.51445	5.17238	3.73663	0.0738261	0.0738261	0.998086	7.87255	0.887293	0.0100556	0.698333	1.72727	58.6413	1.12352	0.00142476	1.06007	1.2339	1.35521
E17 CRE T0 controle du 130223 C2 - x40-6	2.75382	6.71903	14.1352	6.71903	3.63158	3.53591	0.0707454	0.0707454	1.00287	5.68519	0.850416	0.00802222	0.32	2	50.4495	1.07957	0.0012039	0.424329	5.78633	6.03819
E17 CRE T0 controle du 130223 C2 - x40-7	2.59826	5.61726	3.19299	5.61726	2.55663	3.2	0.313186	0.313186	0.910876	1.15208	0.535334	0.0114778	0.55	1	38.5461	1.12736	0.00212451	0.528931	5.82834	7.74386
E17 CRE T0 controle du 130223 C2 - x40-8	3.07457	9.72035	8.10273	9.72035	3.72819	5.18828	0.123415	0.123415	1.0306	5.34804	0.842471	0.0143889	0.511667	0.769231	130.274	1.18876	0.00224821	0.200386	2.3593	3.08297
E17 CRE T0 controle du 130223 C2 - x40-9	2.8101	7.16876	10.8864	7.16876	4.11421	3.36713	0.0918576	0.0918576	0.952707	4.69841	0.824513	0.0159556	0.538333	1.08333	56.6562	1.20118	0.00276134	0.142109	2.44296	6.24209
E17 CRE T0 controle du 130223 C3 - x40-2	3.01434	9.06913	10.8605	9.06913	3.56546	4.58209	0.0920768	0.0920768	0.954015	5.1822	0.838245	0.0162111	0.533333	0.896552	125.645	1.19713	0.0026232	0.341348	2.06864	5.90347
E17 CRE T0 controle du 130223 C3 - x40-3	2.66316	6.05306	5.01709	6.05306	4.70624	2.80612	0.199319	0.199319	1.0057	2.49468	0.713851	0.0073	0.246667	3.66667	37.1514	1.05408	0.00110248	0.586505	1.28017	2.83828
E17 CRE T0 controle du 130223 C3 - x40-4	2.98089	8.72645	6.52006	8.72645	4.8349	4.12245	0.153373	0.153373	1.03875	3.98131	0.79925	0.0118444	0.286667	1.46667	81.8028	1.14141	0.00178411	0.261687	1.04592	2.05284
E17 CRE T0 controle du 130223 C3 - x40-5	3.01085	9.0327	14.0029	9.0327	4.08333	4.47843	0.0714138	0.0714138	1.00188	6.39535	0.86478	0.0141333	0.528333	1.33333	71.7827	1.18747	0.00221343	0.567046	1.58397	4.31239
E17 CRE T0 controle du 130223 C3 - x40-6	3.01832	9.11073	13.1901	9.11073	4.6409	4.09339	0.0758145	0.0758145	0.967901	5.88961	0.854854	0.0117889	0.753333	1.15789	81.57	1.1545	0.00176464	0.46458	2.183	4.00435
E17 CRE T0 controle du 130223 C3 - x40-7	2.51046	5.07723	7.25644	5.07723	3.73473	2.59119	0.137809	0.137809	0.986287	1.51923	0.603053	0.00582222	0.181667	6	18.7627	1.01089	0.000864893	0.617802	10.5097	10.7377
E17 CRE T0 controle du 130223 C3 - x40-8	2.63551	5.86339	3.57059	5.86339	3.89023	2.94505	0.280065	0.280065	0.990676	1.6494	0.622556	0.00738889	0.221667	2	36.5435	1.05698	0.00117073	0.164523	2.00227	2.94802
E17 CRE T0 controle du 130223 C3 - x40-9	3.10569	10.0749	44.4404	10.0749	4.89152	4.34426	0.0225021	0.0225021	0.953669	10.5906	0.913724	0.0220222	3.54	0.939394	128.285	1.25164	0.00364957	1.02295	6.90837	8.48505
E17 CRE T0 controle du 130223 C4 - x40-2	2.95712	8.49096	4.68978	8.49096	3.47797	4.624	0.21323	0.21323	1.0156	3.32551	0.768814	0.0163889	0.62	0.862069	113.019	1.20707	0.00281986	0.387079	1.74584	2.61635
E17 CRE T0 controle du 130223 C4 - x40-3	2.56275	5.39225	4.49586	5.39225	2.78904	3.02581	0.222427	0.222427	0.937127	3.77778	0.790698	0.00668889	0.353333	1	34.9601	1.06092	0.00108127	0.554355	1.63625	1.90683
E17 CRE T0 controle du 130223 C4 - x40-4	2.29385	3.95659	4.88054	3.95659	2.00244	2.53571	0.204895	0.204895	0.906898	2.53448	0.717073	0.00455556	0.101667	1.66667	13.932	0.974073	0.00075144	0.468521	3.19398	9.73214
E17 CRE T0 controle du 130223 C4 - x40-5	2.7978	7.06799	12.9478	7.06799	4.23992	3.27234	0.0772333	0.0772333	0.953325	5.72857	0.85138	0.0104667	0.276667	1.3	56.0399	1.10759	0.0016132	0.346349	4.74326	4.99847
E17 CRE T0 controle du 130223 C4 - x40-6	3.23902	11.7464	21.8275	11.7464	7.04876	4.04208	0.0458137	0.0458137	0.913605	7.99415	0.888817	0.0170889	1.245	1.63158	115.296	1.21191	0.00234764	0.532433	1.16773	2.7591
E17 CRE T0 controle du 130223 C4 - x40-7	3.00073	8.92816	9.46983	8.92816	6.43765	3.24566	0.105599	0.105599	0.92237	3.2107	0.76251	0.0139889	0.543333	1.58333	75.9375	1.17927	0.00219973	0.084549	1.15177	1.90363
E17 CRE T0 controle du 130223 C4 - x40-8	2.95282	8.44904	13.2284	8.44904	2.86533	4.95726	0.0755948	0.0755948	0.993167	10.4504	0.912667	0.0166667	0.503333	0.628571	100	1.2084	0.00297026	0.381226	2.18385	4.85821
E17 CRE T0 controle du 130223 C5 - x40-10	2.70139	6.32541	9.70983	6.32541	3.71723	2.9205	0.102988	0.102988	0.890182	3.42466	0.773994	0.0107667	0.48	0.916667	71.7653	1.1282	0.00172219	0.132453	1.36051	9.01487
E17 CRE T0 controle du 130223 C5 - x40-11	2.10367	3.17855	2.20252	3.17855	1.78814	2.01905	0.454024	0.454024	0.84941	0.955801	0.488701	0.00393333	0.055	4	8.34682	0.989608	0.000680035	0.118846	4.15414	7.617
E17 CRE T0 controle du 130223 C5 - x40-2	2.8883	7.84412	18.4782	7.84412	7.32791	2.51923	0.0541178	0.0541178	0.869388	3.39011	0.772215	0.00887778	0.448333	3.14286	59.7472	1.10234	0.00121393	0.0500313	1.48207	7.86837
E17 CRE T0 controle du 130223 C5 - x40-3	2.60846	5.68359	10.2909	5.68359	3.73876	2.48069	0.0971734	0.0971734	0.843942	3.26425	0.765492	0.00914444	0.383333	1.125	42.173	1.07297	0.0014615	0.541139	1.62961	5.60449
E17 CRE T0 controle du 130223 C5 - x40-4	2.41355	4.54121	3.24566	4.54121	3.43617	2.20886	0.308104	0.308104	0.901642	2.33333	0.7	0.00522222	0.0466667	6	11.6839	1.00846	0.000865181	0.166312	1.86146	2.6373
E17 CRE T0 controle du 130223 C5 - x40-5	2.69643	6.28944	12.9633	6.28944	3.68427	2.60079	0.0771406	0.0771406	0.793724	5.7	0.850746	0.00967778	0.395	1.18182	50.2686	1.10683	0.00158889	0.378831	4.52742	4.76757
E17 CRE T0 controle du 130223 C5 - x40-6	2.19215	3.51942	0.920758	3.51942	1.55438	3.0283	1.08606	1.08606	1.07277	0.693095	0.409366	0.00735556	0.03	0.166667	14.6458	1.1095	0.00143586	0.194331	2.0325	2.17873
E17 CRE T0 controle du 130223 C5 - x40-7	2.87274	7.70486	7.92201	7.70486	3.10294	3.91099	0.126231	0.126231	0.894147	3.47904	0.776738	0.00831111	0.365	1.54545	50.3287	1.09111	0.00126439	0.517088	3.64548	6.94456
E17 CRE T0 controle du 130223 C5 - x40-8	2.91063	8.04841	14.7444	8.04841	6.49134	2.78694	0.0678225	0.0678225	0.882236	3.32086	0.768564	0.00897778	0.435	3.2	36.2319	1.08337	0.00129125	0.333746	6.62621	6.68216
E17 CRE T0 controle du 130223 C5 - x40-9	2.7368	6.58863	4.80488	6.58863	3.58924	3.30693	0.208122	0.208122	0.950893	5.05926	0.834963	0.00908889	0.236667	1.27273	45.3529	1.10366	0.00144687	0.288322	1.43247	1.45722
E17 CRE T0 controle du 130223 C6 - x40-10	3.04418	9.38611	5.0362	9.38611	2.99502	5.39695	0.198563	0.198563	0.995089	5.63971	0.849391	0.0200667	0.453333	0.657143	128.511	1.24828	0.00365911	0.216945	2.02324	2.10309
E17 CRE T0 controle du 130223 C6 - x40-11	2.60524	5.66256	5.53067	5.66256	3.03941	3.05882	0.18081	0.18081	0.941751	3.12183	0.757389	0.00902222	0.181667	0.888889	39.5707	1.11668	0.00157962	0.25306	2.75218	4.71825
E17 CRE T0 controle du 130223 C6 - x40-12	2.28317	3.90823	5.32465	3.90823	2.72335	1.97842	0.187806	0.187806	0.835391	1.69863	0.629442	0.00437778	0.0483333	2.5	16.5161	0.947045	0.000685824	0.47794	4.97857	12.0316
E17 CRE T0 controle du 130223 C6 - x40-13	2.55976	5.37374	8.21986	5.37374	2.71463	3.29661	0.121657	0.121657	1.01076	3.63333	0.784173	0.00463333	0.231667	0.555556	27.0214	0.992955	0.000683377	0.747498	6.61821	6.81797
E17 CRE T0 controle du 130223 C6 - x40-14	2.66021	6.03257	5.06447	6.03257	3.69062	2.98895	0.197454	0.197454	0.951845	4	0.8	0.00711111	0.153333	2	35.5957	1.05484	0.00111194	0.33541	1.38397	1.79164
E17 CRE T0 controle du 130223 C6 - x40-15	2.81452	7.20532	27.4484	7.20532	4.87057	2.61132	0.036432	0.036432	0.799829	5.61261	0.848774	0.00815556	0.918333	1.36364	52.5859	1.05903	0.00114235	0.893513	5.40627	11.2126
E17 CRE T0 controle du 130223 C6 - x40-2	2.69926	6.30992	25.285	6.30992	3.47267	2.82524	0.0395491	0.0395491	0.83438	8.53521	0.895126	0.00752222	0.38	1.22222	47.6898	1.08234	0.00111612	0.415718	2.57637	12.5109
E17 CRE T0 controle du 130223 C6 - x40-3	2.85807	7.57583	19.2715	7.57583	4.70064	3.28293	0.05189	0.05189	0.939527	7.48649	0.882166	0.00697778	0.265	2.8	49.7401	1.05991	0.000956004	0.282166	5.50443	6.0722
E17 CRE T0 controle du 130223 C6 - x40-4	2.74802	6.67429	5.78584	6.67429	3.92098	3.12683	0.172836	0.172836	0.927676	3.2924	0.76703	0.00815556	0.235	4	32.8526	1.07297	0.00133423	0.380019	1.06711	2.26385
E17 CRE T0 controle du 130223 C6 - x40-5	2.96509	8.56916	12.7149	8.56916	5.90448	3.76172	0.0786477	0.0786477	1.06669	5.36076	0.842786	0.0111667	1.04167	1.94118	68.5726	1.1256	0.00165203	1.00199	2.98272	2.98507
E17 CRE T0 controle du 130223 C6 - x40-6	2.83548	7.38132	19.4854	7.38132	6.38874	2.66415	0.0513204	0.0513204	0.912289	4.824	0.828297	0.00808889	0.665	2.8	53.7313	1.08446	0.00109949	0.77122	2.48221	3.96974
E17 CRE T0 controle du 130223 C6 - x40-7	3.00436	8.96553	12.751	8.96553	6.15556	4.08429	0.0784251	0.0784251	1.13025	5.04839	0.834667	0.0125	0.875	1.6875	85.2918	1.14974	0.00173493	0.745952	1.87981	1.97003
E17 CRE T0 controle du 130223 C6 - x40-8	3.13486	10.419	20.3353	10.419	6.08665	4.19872	0.0491756	0.0491756	0.994214	8.11594	0.890302	0.0139778	1.49167	3	88.5938	1.18733	0.00197317	0.838274	2.80134	2.80361
E17 CRE T0 controle du 130223 C6 - x40-9	2.86752	7.65871	7.8791	7.65871	2.90012	4.4	0.126918	0.126918	0.978374	4.90972	0.830787	0.00945556	0.348333	1.23077	56.0127	1.10901	0.00144336	0.445634	2.27103	4.08751
E17 CRE T0 controle du 130223 C7 - x40-1-12	2.78682	6.97919	27.1395	6.97919	4.08571	2.98131	0.0368466	0.0368466	0.863448	4.68376	0.82406	0.00738889	0.673333	2.14286	47.3011	1.05734	0.00105279	0.164523	27.3113	27.3375
E17 CRE T0 controle du 130223 C7 - x40-1-2	2.75337	6.71552	10.8024	6.71552	2.93236	4.02841	0.0925722	0.0925722	1.02722	9.95062	0.908681	0.00985556	0.516667	0.809524	56.8189	1.11452	0.00166015	0.830642	1.01379	3.1066
E17 CRE T0 controle du 130223 C7 - x40-1-3	2.75436	6.72315	7.43533	6.72315	3.10168	3.96111	0.134493	0.134493	1.03763	4.70064	0.824581	0.00994444	0.341667	1.125	42.9322	1.09677	0.00156491	0.425448	3.69168	3.76622
E17 CRE T0 controle du 130223 C7 - x40-1-4	2.87497	7.72466	30.8667	7.72466	4.35707	3.63636	0.0323973	0.0323973	0.982618	6.12879	0.859724	0.0104556	1.48167	1.64286	57.1384	1.1107	0.00159604	0.78509	22.131	22.1552
E17 CRE T0 controle du 130223 C7 - x40-1-5	2.82953	7.33097	10.855	7.33097	3.38024	4.02273	0.0921231	0.0921231	1.00886	5.98745	0.856886	0.0185556	1.19	0.884615	72.9064	1.19881	0.00337401	0.513879	5.36027	5.36428
E17 CRE T0 controle du 130223 C7 - x40-1-6	3.08918	9.88519	32.8781	9.88519	7.10121	3.8206	0.0304154	0.0304154	1.02994	9.35577	0.903435	0.0119667	1.125	1.75	90.0473	1.15948	0.0016415	0.711362	1.769	2.17798
E17 CRE T0 controle du 130223 C7 - x40-1-7	2.63614	5.86765	6.23811	5.86765	3.88939	3.20238	0.160305	0.160305	1.07634	3.71127	0.787743	0.00743333	0.253333	0.75	45.0019	1.05726	0.00117314	0.382737	1.93598	2.17487
E17 CRE T0 controle du 130223 C7 - x40-1-8	2.80633	7.1377	9.31198	7.1377	3.36531	3.83516	0.107389	0.107389	0.985685	5.03968	0.834428	0.00845556	0.205	1.5	65.537	1.08643	0.00131041	0.130701	1.37638	6.10477
E17 CRE T0 controle du 130223 C7 - x40-1-9	2.21026	3.59357	7.19781	3.59357	2.8747	1.8069	0.138931	0.138931	0.852518	2.384	0.704492	0.0047	0.0966667	0	12.4866	0.988861	0.000725773	0.601417	3.32601	7.58433
E17 CRE T0 controle du 130223 C7 - x40-3	3.0013	8.93401	19.2357	8.93401	7.70904	3.23151	0.0519868	0.0519868	1.00429	5.80405	0.853029	0.0111889	1.2	4.8	69.3085	1.13164	0.00156872	0.681723	1.50203	1.87149
E17 CRE T0 controle du 130223 C8 - x40-10	2.37069	4.32253	3.53247	4.32253	3.97421	2.13665	0.283088	0.283088	0.985416	1.47059	0.595238	0.0056	0.12	0	9.72	0.969083	0.000894019	0.498012	1.9199	2.15716
E17 CRE T0 controle du 130223 C8 - x40-2	2.96234	8.54212	6.83537	8.54212	4.21265	4.3253	0.146298	0.146298	1.03927	5.02381	0.833992	0.0140556	0.458333	1.13333	97.0616	1.16975	0.00221643	0.240224	1.07214	1.96619
E17 CRE T0 controle du 130223 C8 - x40-3	2.93283	8.25675	4.65875	8.25675	3.6141	4.38813	0.21465	0.21465	1.01035	2.17994	0.685529	0.0119778	0.32	2.08333	70.9621	1.15592	0.00196377	0.204313	2.74187	4.29579
E17 CRE T0 controle du 130223 C8 - x40-4	3.09241	9.92205	14.9747	9.92205	4.13827	4.89338	0.0667791	0.0667791	1.00327	7.52381	0.882682	0.0159111	0.573333	0.894737	100.83	1.1773	0.00252188	0.560576	1.78621	3.78246
E17 CRE T0 controle du 130223 C8 - x40-5	2.27064	3.85225	1.17245	3.85225	1.72031	3.21649	0.852916	0.852916	1.09514	1.23077	0.551724	0.0058	0.0233333	0.714286	21.6701	1.01991	0.00104101	0.223178	1.483	1.90843
E17 CRE T0 controle du 130223 C8 - x40-6	2.91594	8.09778	13.0548	8.09778	4.16259	3.78927	0.0766003	0.0766003	0.954711	6.32716	0.863521	0.0131889	0.73	1	93.1522	1.16925	0.00204421	0.468017	2.29477	3.97717
E17 CRE T0 controle du 130223 C8 - x40-7	2.66465	6.06344	7.06415	6.06344	3.41941	3.13609	0.14156	0.14156	0.956413	1.67841	0.626645	0.00675556	0.255	1.5	28.937	1.03911	0.0010279	0.602899	9.87703	10.2446
E17 CRE T0 controle du 130223 C8 - x40-8	3.08359	9.8218	10.7501	9.8218	3.71117	5.01439	0.0930226	0.0930226	0.983518	5.33597	0.842171	0.0178111	0.611667	0.931034	139.523	1.2228	0.00291829	0.308943	2.02029	6.01364
E17 CRE T0 controle du 130223 C8 - x40-9	2.86869	7.66904	6.01547	7.66904	5.13834	3.29461	0.166238	0.166238	0.973809	3.53723	0.779601	0.00947778	0.213333	1.9	60.1504	1.10411	0.00142106	0.552093	1.22535	2.04414
E17 CRE T0 controle du 130223 C9 - x40-10	2.7588	6.75766	18.3416	6.75766	3.05771	3.20183	0.0545208	0.0545208	0.828516	8.32967	0.892815	0.00943333	0.306667	1.2	45.6412	1.12732	0.00150475	0.13728	1.83613	9.40756
E17 CRE T0 controle du 130223 C9 - x40-11	2.52553	5.16607	7.45504	5.16607	4.28814	2.19792	0.134137	0.134137	0.881019	2.31875	0.698682	0.0059	0.171667	3.25	19.9353	1.01848	0.000913156	0.216982	3.08877	7.68209
E17 CRE T0 controle du 130223 C9 - x40-2	2.88284	7.79498	10.2821	7.79498	5.42926	3.21774	0.0972565	0.0972565	0.961848	3.2551	0.764988	0.00926667	0.54	1.36364	62.0705	1.08897	0.00138514	0.326672	1.90592	4.62735
E17 CRE T0 controle du 130223 C9 - x40-3	2.35995	4.26943	3.28251	4.26943	2.03676	2.69466	0.304645	0.304645	0.900748	1.51852	0.602941	0.00604444	0.09	2	9.56098	0.993544	0.00106086	0.428746	8.51676	8.80863
E17 CRE T0 controle du 130223 C9 - x40-4	2.21116	3.59727	9.1364	3.59727	1.76703	2.24211	0.109452	0.109452	0.828523	3.29231	0.767025	0.0031	0.0916667	1.5	9.04673	0.940639	0.000476316	0.40161	22.9787	31.0938
E17 CRE T0 controle du 130223 C9 - x40-5	3.09146	9.91121	13.1246	9.91121	4.97348	4.32819	0.0761926	0.0761926	0.973888	4.85057	0.829077	0.0113111	0.546667	2.07143	100.333	1.15758	0.00155506	0.505374	3.70802	4.21364
E17 CRE T0 controle du 130223 C9 - x40-6	2.77301	6.86914	3.70189	6.86914	2.15697	4.85207	0.270132	0.270132	1.0374	4.64179	0.822751	0.0126	0.303333	0.956522	75.8371	1.15812	0.00230294	0.214139	1.33168	2.21802
E17 CRE T0 controle du 130223 C9 - x40-7	2.59783	5.61446	2.82001	5.61446	2.64706	3.16463	0.354609	0.354609	0.917059	2.26923	0.694118	0.00755556	0.13	1.75	39.1864	1.08355	0.00129703	0.115045	1.35526	2.98126
E17 CRE T0 controle du 130223 C9 - x40-8	2.50633	5.05314	1.62929	5.05314	2.61081	3.29688	0.613765	0.613765	1.05421	1.87565	0.652252	0.00616667	0.0716667	1	28.1796	1.00503	0.00111274	0.189832	1.42078	1.54044
E17 CRE T0 controle du 130223 C9 - x40-9	2.52295	5.15074	3.46479	5.15074	3.48932	2.88321	0.288618	0.288618	1.04563	2.86777	0.741453	0.0052	0.0566667	2	31.7723	0.994422	0.000775719	0.323575	1.32267	1.32866
E2 CRE T0 controle du 031023 C1 - x40-1	3.24346	11.8066	5.49699	11.8066	3.83105	6.14089	0.181918	0.181918	1.01804	4.00824	0.800329	0.0202556	0.78	0.808511	220.349	1.2642	0.00332746	0.308056	1.26345	2.83321
E2 CRE T0 controle du 031023 C1 - x40-2	3.37846	13.7919	11.0491	13.7919	4.34759	6.46602	0.0905052	0.0905052	0.977546	6.4598	0.865948	0.0329889	1.87167	0.753425	312.956	1.33835	0.00535323	0.183525	2.56849	3.13765
E2 CRE T0 controle du 031023 C1 - x40-3	3.27232	12.2055	7.16779	12.2055	3.7619	6.15894	0.139513	0.139513	0.978707	6.21875	0.861472	0.0205333	1.18667	1.02174	176.445	1.25645	0.00321547	0.427669	1.1446	1.18254
E2 CRE T0 controle du 031023 C1 - x40-4	3.20168	11.2522	24.0651	11.2522	4.05927	4.71336	0.041554	0.041554	0.843953	7.27673	0.879179	0.0146222	0.765	1.16667	156.85	1.20964	0.0021115	0.60895	1.7794	9.64837
E2 CRE T0 controle du 031023 C1 - x40-5	3.18261	11.0078	15.5021	11.0078	3.28672	6.4	0.0645074	0.0645074	1.05405	10.5691	0.913563	0.0158111	1.34167	0.818182	177.97	1.20526	0.00238272	0.901704	1.2958	2.83522
E2 CRE T0 controle du 031023 C1 - x40-6	3.14543	10.5466	9.58195	10.5466	3.72794	5.10938	0.104363	0.104363	0.935385	5.72527	0.851307	0.0136	0.725	1.14286	148.979	1.17937	0.00196299	0.460889	3.25395	3.31564
E2 CRE T0 controle du 031023 C1 - x40-7	3.36664	13.6055	38.5303	13.6055	7.22331	5.20155	0.0259536	0.0259536	1.02751	10.5364	0.913318	0.0193556	1.84333	0.880952	218.052	1.24003	0.002731	0.259161	4.34063	4.72883
E2 CRE T0 controle du 031023 C10 - x40-1	2.85386	7.53923	1.50437	7.53923	2.38894	5.38889	0.664731	0.664731	1.10478	2.01412	0.668229	0.0118556	0.125	0.740741	99.237	1.17016	0.00219204	0.126224	1.28627	1.35054
E2 CRE T0 controle du 031023 C10 - x40-10	3.35713	13.4574	17.0822	13.4574	3.5607	7.60156	0.0585406	0.0585406	1.06588	13.1017	0.929087	0.0184889	1.24	0.677419	244.647	1.24733	0.00273462	0.559017	2.09953	2.14629
E2 CRE T0 controle du 031023 C10 - x40-11	3.25647	11.9847	14.5284	11.9847	4.08493	6.46559	0.0688308	0.0688308	1.09036	12.9901	0.928521	0.0157	0.795	1.20513	178.549	1.20704	0.00232441	0.271297	1.56563	1.60023
E2 CRE T0 controle du 031023 C10 - x40-12	3.01282	9.05325	4.62314	9.05325	3.44273	4.96035	0.216303	0.216303	1.01662	4.42291	0.815597	0.0136778	0.39	0.787879	127.653	1.1874	0.00224028	0.166192	1.29171	1.6029
E2 CRE T0 controle du 031023 C10 - x40-13	3.08227	9.80683	5.60904	9.80683	2.86018	5.50562	0.178284	0.178284	0.949454	4.03662	0.801454	0.0198667	0.723333	0.584906	163.472	1.23599	0.00355076	0.361763	1.5702	3.16421
E2 CRE T0 controle du 031023 C10 - x40-14	2.81969	7.24838	3.88949	7.24838	2.23851	5.36979	0.257103	0.257103	1.1084	5.88034	0.854658	0.0178889	0.448333	0.44898	116.861	1.22021	0.0034552	0.264927	1.34067	1.8082
E2 CRE T0 controle du 031023 C10 - x40-15	2.95601	8.48011	7.81079	8.48011	2.93517	4.43697	0.128028	0.128028	0.896401	4.87619	0.829822	0.0137111	0.355	0.529412	115.562	1.15728	0.0023257	0.342789	4.03562	5.57837
E2 CRE T0 controle du 031023 C10 - x40-16	2.98644	8.78244	3.53517	8.78244	2.61216	5.68984	0.282872	0.282872	1.04709	4.50943	0.818493	0.0129778	0.381667	0.542857	149.46	1.15743	0.00211285	0.261712	1.17468	1.35816
E2 CRE T0 controle du 031023 C10 - x40-17	2.94157	8.34027	4.31539	8.34027	2.81906	5.5731	0.231729	0.231729	1.12194	2.98084	0.748797	0.0115444	0.235	0.6	105.136	1.14873	0.00197585	0.292676	3.26548	3.91302
E2 CRE T0 controle du 031023 C10 - x40-18	3.16465	10.7825	24.7814	10.7825	4.41031	4.51393	0.0403529	0.0403529	0.879161	9.24648	0.902405	0.0161667	1.86667	2	109.977	1.19916	0.00241686	0.506317	3.59977	6.61675
E2 CRE T0 controle du 031023 C10 - x40-2	2.73068	6.54236	10.5909	6.54236	2.85331	3.03239	0.0944208	0.0944208	0.782933	3.61504	0.783317	0.0115889	0.238333	0.894737	80.2154	1.1644	0.00197671	0.24964	1.58576	12.3268
E2 CRE T0 controle du 031023 C10 - x40-3	3.10923	10.116	4.04026	10.116	3.06485	5.95045	0.247509	0.247509	1.02978	4.1015	0.803979	0.0150778	0.278333	0.628571	157.1	1.18386	0.00256233	0.21886	1.34016	1.36553
E2 CRE T0 controle du 031023 C10 - x40-4	2.41504	4.54901	2.37044	4.54901	2.1224	3.00952	0.421863	0.421863	0.963817	1.57718	0.611979	0.00426667	0.151667	0	15.834	1.01707	0.000687077	0.326758	4.00852	4.12279
E2 CRE T0 controle du 031023 C10 - x40-5	2.96456	8.56401	9.91324	8.56401	2.95995	5.02137	0.100875	0.100875	1.00876	6.72165	0.870494	0.0166444	1.05	0.581395	155.982	1.19968	0.00286476	0.660238	2.52874	4.37967
E2 CRE T0 controle du 031023 C10 - x40-6	2.38428	4.3907	2.36139	4.3907	1.9812	2.74046	0.423479	0.423479	0.878525	1.01515	0.503759	0.00591111	0.04	1.6	20.4328	1.02607	0.00101784	0.15632	2.70693	6.32133
E2 CRE T0 controle du 031023 C10 - x40-7	3.18838	11.0812	10.324	11.0812	3.79244	5.40767	0.096862	0.096862	0.950351	6.3981	0.86483	0.0173444	1.15833	0.95122	193.423	1.22673	0.00263586	0.392923	2.14076	2.59722
E2 CRE T0 controle du 031023 C10 - x40-8	3.11881	10.2282	7.08738	10.2282	2.65425	6.60811	0.141096	0.141096	1.05256	7.84865	0.886988	0.0181889	0.555	0.438596	174.249	1.24064	0.00313536	0.398531	2.25973	2.2612
E2 CRE T0 controle du 031023 C10 - x40-9	2.69145	6.25344	1.54018	6.25344	2.29248	4.125	0.649273	0.649273	0.998751	1.63971	0.62117	0.00797778	0.138333	0.866667	74.2691	1.09775	0.00141107	0.373197	1.29132	1.67846
E2 CRE T0 controle du 031023 C2 - x40-1	2.68691	6.22085	5.44067	6.22085	2.45271	3.78659	0.183801	0.183801	0.953281	4.11613	0.80454	0.00881111	0.163333	0.866667	62.0705	1.09154	0.00149633	0.433467	1.52124	3.7651
E2 CRE T0 controle du 031023 C2 - x40-2	2.78965	7.00195	9.86952	7.00195	2.66892	3.91284	0.101322	0.101322	0.912939	5.31551	0.84166	0.0131222	0.711667	0.470588	89.9406	1.15811	0.00235476	0.477256	4.31722	6.5565
E2 CRE T0 controle du 031023 C2 - x40-3	3.24504	11.8281	11.24	11.8281	5.00404	5.52215	0.0889677	0.0889677	1.04436	8.21277	0.891455	0.0192444	1.16333	1.02326	229.291	1.26232	0.00277584	0.433179	1.20037	1.24694
E2 CRE T0 controle du 031023 C2 - x40-4	3.35495	13.4237	11.3002	13.4237	4.79483	6.261	0.0884939	0.0884939	1.02131	6.74231	0.87084	0.0223667	0.808333	0.716418	277.13	1.27097	0.003389	0.0498383	1.31203	1.76916
E2 CRE T0 controle du 031023 C2 - x40-5	3.16589	10.7979	6.02616	10.7979	2.83376	6.62143	0.165943	0.165943	1.03227	6.30841	0.863171	0.0260667	0.935	0.388889	219.04	1.27857	0.00486615	0.14888	2.35827	2.36404
E2 CRE T0 controle du 031023 C2 - x40-6	2.90549	8.0009	9.93502	8.0009	3.86242	3.97736	0.100654	0.100654	0.97698	5.87065	0.854453	0.0153444	0.893333	0.65625	96.2449	1.19506	0.00266927	0.45825	2.13458	3.07236
E2 CRE T0 controle du 031023 C2 - x40-7	3.11025	10.1279	22.7982	10.1279	5.19986	4.47351	0.043863	0.043863	1.00722	7.90566	0.887712	0.0157333	1.35167	1.33333	144.372	1.19495	0.00231202	0.545267	6.19244	6.21337
E2 CRE T0 controle du 031023 C2 - x40-8	3.01362	9.06157	5.87655	9.06157	3.61891	4.94561	0.170168	0.170168	1.03826	4.35178	0.813146	0.0150444	0.49	1.25806	120.342	1.18715	0.00237951	0.112051	1.13168	1.85445
E2 CRE T0 controle du 031023 C3 - x40-1	3.25112	11.9111	16.1369	11.9111	4.40602	5.35882	0.0619699	0.0619699	0.944363	5.84559	0.853921	0.0206889	1.07167	0.754717	229.444	1.25577	0.00330068	0.0732842	7.80214	10.7401
E2 CRE T0 controle du 031023 C3 - x40-10	2.73007	6.53774	17.0762	6.53774	3.41318	3.34104	0.0585609	0.0585609	0.944134	4.75926	0.826367	0.00691111	0.926667	1.15385	52.3268	1.0759	0.00101973	1.11839	6.13166	16.7559
E2 CRE T0 controle du 031023 C3 - x40-3	2.9252	8.18458	3.77456	8.18458	3.3094	4.5625	0.264931	0.264931	1.0141	2.66507	0.727154	0.00851111	0.165	0.944444	86.1059	1.10081	0.00129633	0.371996	1.2519	1.83017
E2 CRE T0 controle du 031023 C3 - x40-4	3.03062	9.24069	5.97887	9.24069	3.36449	4.88991	0.167256	0.167256	0.970636	3.9486	0.797923	0.0117667	0.626667	0.806452	116.682	1.16591	0.00181881	0.40418	1.87765	2.35877
E2 CRE T0 controle du 031023 C3 - x40-5	2.80354	7.11485	6.57769	7.11485	2.75801	3.90789	0.152029	0.152029	0.912169	4.64706	0.822917	0.0138667	0.308333	1.09091	99.0857	1.17591	0.00244543	0.385016	2.26684	4.46423
E2 CRE T0 controle du 031023 C3 - x40-6	3.20314	11.2711	29.0831	11.2711	5.16232	4.66333	0.0343843	0.0343843	0.940051	11.5102	0.920065	0.0136222	1.24	1.14706	164.682	1.18899	0.00187173	0.574044	3.47582	3.56861
E2 CRE T0 controle du 031023 C3 - x40-7	2.78415	6.95779	2.46928	6.95779	2.6057	4.42361	0.404976	0.404976	1.02628	2.23786	0.691154	0.00741111	0.06	1	56.2278	1.09319	0.00119237	0.309761	1.38517	1.86962
E2 CRE T0 controle du 031023 C3 - x40-8	3.27184	12.1988	58.9003	12.1988	6.47208	4.5496	0.0169778	0.0169778	0.948808	17.7805	0.946753	0.0171111	1.35	1.26316	200.741	1.23981	0.00227856	0.205445	1.41312	5.30439
E2 CRE T0 controle du 031023 C3 - x40-9	2.98576	8.77556	11.3593	8.77556	2.67025	5.73248	0.0880337	0.0880337	1.06744	6.89623	0.873357	0.0093	0.811667	0.75	101.209	1.14369	0.00144178	0.809147	5.21744	6.25674
E2 CRE T0 controle du 031023 C4 - x40-1	3.11994	10.2415	25.9577	10.2415	5.0756	4.40864	0.0385243	0.0385243	0.969807	10.4188	0.912425	0.0148444	0.995	1.02632	155.23	1.18497	0.0020833	0.199175	2.72684	4.17475
E2 CRE T0 controle du 031023 C4 - x40-2	2.776	6.89277	3.93605	6.89277	3.19381	3.92268	0.254062	0.254062	1.01705	2.51449	0.715464	0.0107778	0.365	1	64.1513	1.1374	0.00179673	0.577945	1.18394	2.76633
E2 CRE T0 controle du 031023 C4 - x40-3	2.38284	4.38344	3.74485	4.38344	2.36802	2.85484	0.267034	0.267034	1.00221	2.57931	0.720617	0.00576667	0.1	1.5	16.2674	1.06946	0.000993148	0.466612	3.56742	3.82235
E2 CRE T0 controle du 031023 C4 - x40-4	3.24412	11.8156	24.3753	11.8156	6.30382	4.61675	0.0410251	0.0410251	0.981028	7.93839	0.888123	0.0209556	2.10167	0.864865	191.934	1.25066	0.00304329	1.04028	3.6347	3.83027
E2 CRE T0 controle du 031023 C4 - x40-5	2.72303	6.48501	8.19916	6.48501	3.96989	2.99078	0.121964	0.121964	0.91889	4.53472	0.819322	0.00885556	0.303333	1	48.5207	1.07073	0.00144985	0.510861	1.5575	1.68973
E2 CRE T0 controle du 031023 C4 - x40-6	2.44691	4.719	2.986	4.719	2.34278	2.9125	0.334896	0.334896	0.944674	2.47982	0.712629	0.00862222	0.2	0.75	44.0072	1.0744	0.00157456	0.143592	2.49217	3.15161
E2 CRE T0 controle du 031023 C5 - x40-1	3.24589	11.8397	14.8045	11.8397	4.93026	5.02492	0.0675472	0.0675472	0.942378	7.2514	0.878808	0.0164111	1.24833	0.894737	161.606	1.24149	0.00241092	0.443107	1.72484	2.28896
E2 CRE T0 controle du 031023 C5 - x40-10	3.00264	8.94773	5.10777	8.94773	3.8831	4.63333	0.19578	0.19578	1.0204	3.27727	0.766206	0.0104556	0.446667	1.27778	91.6075	1.14377	0.00157324	0.321064	1.17222	2.13593
E2 CRE T0 controle du 031023 C5 - x40-2	3.08498	9.83756	6.79828	9.83756	4.28908	4.31183	0.147096	0.147096	0.907729	4.19651	0.807563	0.0132222	0.481667	0.666667	159.9	1.16211	0.0021615	0.298455	2.52786	3.72094
E2 CRE T0 controle du 031023 C5 - x40-3	3.03551	9.29291	12.5432	9.29291	4.57298	3.95849	0.0797246	0.0797246	0.910914	4.25389	0.809665	0.0112667	0.436667	0.896552	112.565	1.14925	0.00166171	0.198615	1.61175	7.39521
E2 CRE T0 controle du 031023 C5 - x40-4	3.0556	9.51032	6.45892	9.51032	3.30659	5.11055	0.154825	0.154825	0.977154	5.19048	0.838462	0.0101111	0.25	1.5	106.455	1.11895	0.00152957	0.267261	1.92508	1.95683
E2 CRE T0 controle du 031023 C5 - x40-5	3.25305	11.9376	8.19779	11.9376	3.44955	6.25067	0.121984	0.121984	0.972501	5.30882	0.841492	0.0333667	1.03167	0.52	333.488	1.34018	0.00599041	0.201559	1.09395	4.19224
E2 CRE T0 controle du 031023 C5 - x40-6	3.00195	8.94072	5.79047	8.94072	3.3003	5.35391	0.172697	0.172697	1.08787	4.01488	0.800593	0.0187222	0.683333	0.488889	162.36	1.22183	0.00333909	0.414858	2.00164	4.3486
E2 CRE T0 controle du 031023 C5 - x40-7	2.51539	5.10609	2.18051	5.10609	2.20921	3.19872	0.458608	0.458608	0.93112	2.06452	0.673684	0.00844444	0.168333	0.888889	45.125	1.10496	0.00156658	0.292449	2.52516	2.55453
E2 CRE T0 controle du 031023 C5 - x40-8	2.87531	7.72765	14.3887	7.72765	3.40431	3.71713	0.0694988	0.0694988	0.887513	6.53247	0.867241	0.0128889	0.441667	0.909091	87.6829	1.1624	0.0021395	0.0415227	1.01562	6.94241
E2 CRE T0 controle du 031023 C5 - x40-9	2.58925	5.55931	3.672	5.55931	2.25895	3.93333	0.272331	0.272331	1.06339	4.37778	0.81405	0.00806667	0.128333	0.75	43.8596	1.06261	0.0014166	0.259794	2.1588	2.17644
E2 CRE T0 controle du 031023 C6- x40-1	3.31092	12.7601	19.088	12.7601	3.79517	6.21752	0.052389	0.052389	0.949244	12.0189	0.923188	0.023	1.29667	0.633803	264.532	1.26948	0.00372555	0.177203	4.72833	4.97861
E2 CRE T0 controle du 031023 C6- x40-2	3.21047	11.3666	6.10218	11.3666	3.41254	6.07194	0.163876	0.163876	0.986819	5.90945	0.855271	0.0195	0.768333	0.648148	205.953	1.25034	0.00328814	0.205342	1.80909	2.2977
E2 CRE T0 controle du 031023 C6- x40-3	3.05965	9.55473	13.2785	9.55473	3.90016	4.62835	0.0753094	0.0753094	0.956641	5.83871	0.853774	0.0141333	0.805	0.857143	89.6354	1.18635	0.00217659	0.198263	3.37672	4.91498
E2 CRE T0 controle du 031023 C6- x40-4	3.05059	9.45565	5.74924	9.45565	4.33501	4.67483	0.173936	0.173936	1.02936	4.9812	0.83281	0.0176778	0.841667	0.882353	137.607	1.22156	0.00291285	0.417258	1.34773	1.62139
E2 CRE T0 controle du 031023 C6- x40-5	2.3194	4.0747	1.78183	4.0747	1.7716	3.02326	0.56122	0.56122	0.987558	1.26573	0.558642	0.0036	0.0366667	1.25	16.7127	0.978592	0.000585827	0.175682	3.89413	3.9042
E2 CRE T0 controle du 031023 C6- x40-6	2.63802	5.8804	1.92385	5.8804	2.58153	3.34483	0.519792	0.519792	0.913913	1.21503	0.548539	0.0117889	0.173333	1.05556	60.7285	1.16364	0.00229778	0.0921008	1.06899	4.12913
E2 CRE T0 controle du 031023 C6- x40-7	3.02228	9.15237	15.7533	9.15237	4.51147	4.01608	0.0634787	0.0634787	0.932025	5.36052	0.84278	0.0164667	1.30833	0.892857	117.445	1.2205	0.00264407	0.572067	1.39708	5.57924
E2 CRE T0 controle du 031023 C6- x40-8	3.24471	11.8236	15.2302	11.8236	4.03658	5.55932	0.065659	0.065659	0.944664	7.27568	0.879164	0.0170111	1.10667	0.75	206.337	1.23459	0.00261335	0.21686	2.34051	6.84868
E2 CRE T0 controle du 031023 C6- x40-9	2.95611	8.48106	8.3223	8.48106	3.98895	4.22541	0.120159	0.120159	0.995057	3.74194	0.789116	0.0130667	0.66	0.709677	129.004	1.17431	0.00212771	0.268847	3.09304	5.31654
E2 CRE T0 controle du 031023 C7 - x40-1	3.26782	12.1425	12.8192	12.1425	4.09112	5.53106	0.0780081	0.0780081	0.921345	8.72727	0.897196	0.0190222	1.195	0.846154	209.303	1.25263	0.00295437	0.351897	1.7956	2.70529
E2 CRE T0 controle du 031023 C7 - x40-2	3.10198	10.0319	15.7403	10.0319	4.14761	4.73391	0.0635313	0.0635313	0.961027	7.2931	0.879418	0.0106889	0.771667	0.9	121.04	1.1249	0.0015178	0.619335	1.40044	3.00239
E2 CRE T0 controle du 031023 C7 - x40-3	3.31878	12.8761	7.21836	12.8761	4.42964	6.39806	0.138536	0.138536	1.0458	6.56452	0.867804	0.0208444	0.803333	0.816327	217.46	1.25148	0.0032534	0.190387	1.13143	1.27932
E2 CRE T0 controle du 031023 C7 - x40-4	3.21292	11.3987	11.6315	11.3987	3.39292	5.78485	0.0859738	0.0859738	0.934813	6.5661	0.867832	0.0248	1.28833	0.754386	209.483	1.29767	0.00416675	0.661607	1.22739	5.40982
E2 CRE T0 controle du 031023 C7 - x40-5	2.56292	5.39328	3.1228	5.39328	2.25632	3.84615	0.320225	0.320225	1.07121	2.29762	0.696751	0.00615556	0.14	0.625	36.0725	1.03263	0.00106342	0.350348	3.0428	4.19586
E2 CRE T0 controle du 031023 C7 - x40-6	2.71578	6.43108	8.35258	6.43108	2.875	3.97024	0.119723	0.119723	1.04677	4.90345	0.830607	0.00951111	0.521667	0.555556	52.9339	1.1325	0.00162787	0.810273	3.26166	5.6341
E2 CRE T0 controle du 031023 C7 - x40-7	2.67374	6.12726	1.68088	6.12726	2.48141	3.83594	0.594928	0.594928	0.986176	1.59391	0.614481	0.00567778	0.0316667	1.42857	50.5605	1.04326	0.000885366	0.1595	1.03773	1.6226
E2 CRE T0 controle du 031023 C8 - x40-1	3.51169	16.0783	14.3743	16.0783	4.41568	8.83498	0.0695688	0.0695688	1.15469	13.141	0.929284	0.0245111	1.68167	0.938272	351.61	1.29572	0.00346062	0.609683	1.28342	1.3091
E2 CRE T0 controle du 031023 C8 - x40-10	2.90875	8.03097	3.61605	8.03097	2.83056	4.87845	0.276545	0.276545	1.022	4.28571	0.810811	0.0106889	0.178333	1.15789	82.0628	1.11692	0.00177446	0.420375	1.44924	1.54759
E2 CRE T0 controle du 031023 C8 - x40-11	2.57396	5.46227	7.03999	5.46227	2.78328	2.87603	0.142046	0.142046	0.878414	2.26263	0.693498	0.00358889	0.14	1.6	26.4688	0.94948	0.000496792	0.0786889	12.7342	16.3249
E2 CRE T0 controle du 031023 C8 - x40-12	2.98964	8.81489	6.67762	8.81489	3.46733	4.38785	0.149754	0.149754	0.9269	3.16129	0.75969	0.0100333	0.448333	0.909091	103.92	1.12499	0.00153647	0.599926	1.0448	3.63916
E2 CRE T0 controle du 031023 C8 - x40-13	2.21996	3.63391	2.69485	3.63391	1.67143	2.83871	0.371079	0.371079	1.00993	2	0.666667	0.00466667	0.055	1.25	12.4321	1.01957	0.000841186	0.449868	6.27852	7.30924
E2 CRE T0 controle du 031023 C8 - x40-2	3.05076	9.45751	9.13363	9.45751	3.02253	5.42202	0.109486	0.109486	0.996711	5.8674	0.854385	0.0138111	0.631667	0.615385	145.432	1.19673	0.0022649	0.228676	3.33751	4.28612
E2 CRE T0 controle du 031023 C8 - x40-3	2.82614	7.30238	8.37108	7.30238	3.86544	4.08642	0.119459	0.119459	1.10022	3.30263	0.767584	0.00726667	0.476667	1.77778	55.5558	1.06273	0.00107685	0.641338	3.74741	3.82965
E2 CRE T0 controle du 031023 C8 - x40-4	1.9632	2.70394	1.33171	2.70394	1.7716	2	0.750917	0.750917	0.984501	1.7	0.62963	0.0018	0	1	6.62745	0.843964	0.000274984	0.111111	1.73898	1.74017
E2 CRE T0 controle du 031023 C8 - x40-5	3.18989	11.1005	15.7792	11.1005	5.18437	4.73684	0.0633745	0.0633745	0.971619	4.71359	0.824979	0.0130778	0.628333	1.37037	140.228	1.17984	0.00182283	0.455309	4.98679	6.14393
E2 CRE T0 controle du 031023 C8 - x40-6	3.28153	12.3355	16.7025	12.3355	3.60267	6.39073	0.0598714	0.0598714	0.983342	8.41063	0.893737	0.0216444	1.17667	0.888889	225.087	1.25726	0.0034667	0.193583	8.11516	8.32812
E2 CRE T0 controle du 031023 C8 - x40-7	3.28994	12.4555	16.5732	12.4555	3.90006	6.16066	0.0603382	0.0603382	0.976787	11.6643	0.921038	0.0201222	1.37667	1.02273	206.576	1.25958	0.00308371	0.342144	1.14163	2.3348
E2 CRE T0 controle du 031023 C8 - x40-8	3.10342	10.0486	9.42256	10.0486	2.99206	5.51379	0.106128	0.106128	0.949138	6.90196	0.873449	0.0223889	1.385	0.869565	173.755	1.26452	0.00396025	0.55111	1.3209	3.86017
E2 CRE T0 controle du 031023 C8 - x40-9	2.92447	8.17772	8.03235	8.17772	3.24295	4.27099	0.124497	0.124497	0.940518	3.71519	0.787919	0.0165556	0.575	0.8	102.563	1.20827	0.00290453	0.25646	6.87984	7.00637
E2 CRE T0 controle du 031023 C9 - x40-1	3.21921	11.4816	10.5789	11.4816	3.75075	6.40523	0.0945279	0.0945279	1.08042	7.91923	0.887883	0.0257667	1.28667	0.915254	234.592	1.28434	0.00432422	0.295138	3.02115	3.07511
E2 CRE T0 controle du 031023 C9 - x40-10	3.27923	12.303	13.5754	12.303	4.9125	5.72664	0.0736627	0.0736627	1.03167	5.57534	0.847917	0.016	1.25667	1.37838	199.866	1.21339	0.00220279	0.50346	2.55522	3.20156
E2 CRE T0 controle du 031023 C9 - x40-11	3.07404	9.71433	8.64958	9.71433	3.39245	5.40079	0.115612	0.115612	1.024	5.70386	0.850832	0.0173556	0.783333	0.454545	156.46	1.22116	0.00295175	0.151814	3.38316	3.42297
E2 CRE T0 controle du 031023 C9 - x40-12	2.88533	7.81739	8.01898	7.81739	2.90654	4.57604	0.124704	0.124704	0.997967	5	0.833333	0.0142667	0.616667	0.647059	109.952	1.18262	0.00241115	0.480135	5.4151	5.44708
E2 CRE T0 controle du 031023 C9 - x40-13	3.04205	9.36309	14.3252	9.36309	4.127	4.18107	0.0698071	0.0698071	0.907164	5.41781	0.844184	0.0104111	0.58	0.888889	105.589	1.11933	0.00151221	0.196011	8.26031	8.26472
E2 CRE T0 controle du 031023 C9 - x40-2	3.06028	9.56171	7.45168	9.56171	3.34349	5.67788	0.134198	0.134198	1.0858	6.18343	0.860791	0.0134889	1.25167	0.710526	136.731	1.18751	0.00211012	0.667558	1.33549	1.87326
E2 CRE T0 controle du 031023 C9 - x40-3	3.21044	11.3662	9.03832	11.3662	4.87173	5.26756	0.11064	0.11064	1.02291	5.47458	0.84555	0.0169778	0.746667	1.27273	170.975	1.20876	0.00256981	0.257098	2.08593	2.21004
E2 CRE T0 controle du 031023 C9 - x40-4	3.01351	9.06043	7.15298	9.06043	2.60452	5.83756	0.139802	0.139802	1.03979	5.41	0.843994	0.0142444	0.363333	0.666667	136.992	1.18694	0.00242756	0.291588	1.9003	4.39189
E2 CRE T0 controle du 031023 C9 - x40-5	2.50126	5.02374	1.56562	5.02374	1.98539	3.65289	0.638726	0.638726	1.02455	1.70175	0.62987	0.00684444	0.085	0.642857	46.9716	1.0618	0.00122103	0.332249	1.30303	1.96111
E2 CRE T0 controle du 031023 C9 - x40-6	2.92276	8.16159	17.4589	8.16159	3.23231	4.14831	0.0572775	0.0572775	0.913803	8.38525	0.89345	0.0127222	0.851667	0.580645	102.616	1.14475	0.00205925	0.357087	1.44075	8.1061
E2 CRE T0 controle du 031023 C9 - x40-7	3.28739	12.4191	7.65147	12.4191	2.70782	7.3213	0.130694	0.130694	0.970081	10.8547	0.915646	0.0235778	1.03833	0.430108	294.93	1.27129	0.00412545	0.186743	1.01414	1.30143
E2 CRE T0 controle du 031023 C9 - x40-8	3.23684	11.717	7.20377	11.717	4.18097	5.84488	0.138816	0.138816	1.01999	6.80258	0.871837	0.0202	0.918333	0.685185	211.509	1.24598	0.0032656	0.335799	1.06165	1.26296
E2 CRE T0 controle du 031023 C9 - x40-9	2.24699	3.7488	1.61414	3.7488	2.02406	2.47115	0.619525	0.619525	0.93782	0.879397	0.467914	0.00415556	0	1.33333	16.0514	0.9927	0.000713636	0.0731272	3.07097	5.61013
E20 CRE T0 controle du 130223 C1 - x40-10	3.12761	10.3324	11.847	10.3324	4.1527	5	0.0844098	0.0844098	0.98613	6.88696	0.873208	0.0201556	0.888333	0.833333	127.841	1.24998	0.00322634	0.117395	1.78462	2.94694
E20 CRE T0 controle du 130223 C1 - x40-11	2.95921	8.51142	10.137	8.51142	3.50305	4.50584	0.0986487	0.0986487	0.990824	3.66139	0.785472	0.0163667	1.51167	1.28571	91.8548	1.19231	0.00273384	0.54964	11.6964	11.7886
E20 CRE T0 controle du 130223 C1 - x40-12	3.14457	10.5361	27.5512	10.5361	4.93139	5.13816	0.0362961	0.0362961	1.08296	13.575	0.931389	0.0194333	1.26	1.53846	148.597	1.25151	0.00276494	0.365774	2.69615	3.74622
E20 CRE T0 controle du 130223 C1 - x40-13	2.78189	6.93972	16.4766	6.93972	3.39234	3.64497	0.0606923	0.0606923	0.967391	7.14286	0.877193	0.00696667	0.206667	2	48.3073	1.03886	0.00103572	0.215063	8.00567	8.6903
E20 CRE T0 controle du 130223 C1 - x40-14	2.92305	8.16429	12.3107	8.16429	4.45379	3.76285	0.0812302	0.0812302	0.972664	5.9359	0.855823	0.0120222	0.775	1.05556	78.7257	1.1403	0.001886	0.820824	1.93815	3.4143
E20 CRE T0 controle du 130223 C1 - x40-2	2.99827	8.90287	52.6768	8.90287	5.1002	3.43785	0.0189837	0.0189837	0.872069	15.163	0.93813	0.0165222	1.8	1.7	115.845	1.22558	0.0024382	0.8775	1.16271	7.1329
E20 CRE T0 controle du 130223 C1 - x40-3	2.71266	6.40807	15.3531	6.40807	4.30647	2.80269	0.0651333	0.0651333	0.90763	4.04667	0.801849	0.00841111	0.468333	1.875	39.5799	1.06308	0.00125378	0.568899	5.57128	8.49754
E20 CRE T0 controle du 130223 C1 - x40-4	2.64173	5.90557	4.02783	5.90557	2.8345	3.58333	0.248273	0.248273	1.02156	2.44444	0.709677	0.00792222	0.126667	2.28571	50.5929	1.1034	0.0013144	0.149801	3.31345	5.07294
E20 CRE T0 controle du 130223 C1 - x40-5	2.84623	7.47326	5.03112	7.47326	3.87035	3.68692	0.198763	0.198763	0.970573	3.45729	0.775648	0.00985556	0.533333	1.73333	62.2805	1.12322	0.00151331	0.605313	1.24726	1.43511
E20 CRE T0 controle du 130223 C1 - x40-6	2.88936	7.85375	5.75225	7.85375	3.49439	4.60633	0.173845	0.173845	1.09639	4.52479	0.818998	0.0148556	0.688333	1.36842	62.211	1.20187	0.00254309	0.638458	1.36431	1.72125
E20 CRE T0 controle du 130223 C1 - x40-7	3.04053	9.34675	16.8479	9.34675	4.63899	4.2921	0.0593545	0.0593545	0.989055	7.93711	0.888107	0.0157889	1.52	1	114.422	1.19117	0.00237934	0.6525	2.37859	2.6663
E20 CRE T0 controle du 130223 C1 - x40-8	2.83136	7.34639	4.69654	7.34639	2.96967	4.1699	0.212923	0.212923	0.978152	4.75661	0.826287	0.0120889	0.326667	0.75	56.8142	1.14281	0.0020805	0.412355	1.08237	1.60637
E20 CRE T0 controle du 130223 C1 - x40-9	2.76355	6.79472	5.85275	6.79472	3.03057	4.16848	0.17086	0.17086	1.06799	5.25926	0.840237	0.0112667	0.126667	0.769231	54.2547	1.11483	0.00189441	0.346865	2.08882	2.10845
E20 CRE T0 controle du 130223 C10 - x40-10	3.09849	9.99166	8.27297	9.99166	3.43514	5.64	0.120876	0.120876	1.0462	6.06502	0.858457	0.0253556	1.29	1	117.121	1.29148	0.00448148	0.340773	1.14954	2.60926
E20 CRE T0 controle du 130223 C10 - x40-11	3.02923	9.22597	11.3433	9.22597	4.20185	4.60766	0.0881576	0.0881576	1.02374	3.63636	0.784314	0.00963333	0.606667	2.07692	73.7882	1.11762	0.00139549	0.339618	7.49418	7.73023
E20 CRE T0 controle du 130223 C10 - x40-12	2.8914	7.87221	4.78378	7.87221	3.39746	4.65104	0.20904	0.20904	1.08901	3.83019	0.792969	0.0113778	0.095	2.33333	55.8732	1.14196	0.00183934	0.268823	1.64103	2.24818
E20 CRE T0 controle du 130223 C10 - x40-13	2.71275	6.40867	5.41631	6.40867	2.65811	3.6568	0.184628	0.184628	0.930294	3.20455	0.762162	0.00822222	0.0583333	0.923077	44.8245	1.08223	0.00139531	0.116248	3.68647	7.2064
E20 CRE T0 controle du 130223 C10 - x40-14	2.71372	6.41587	4.63577	6.41587	4.175	2.94366	0.215714	0.215714	0.937476	3.31818	0.768421	0.00844444	0.291667	2	46.6182	1.08969	0.00132927	0.0512989	1.248	1.26224
E20 CRE T0 controle du 130223 C10 - x40-15	2.19592	3.53473	1.3814	3.53473	1.9866	2.54737	0.723903	0.723903	1.01576	0.874372	0.466488	0.00414444	0.00333333	2	8.29885	1.00202	0.000724819	0.103556	2.86767	4.14984
E20 CRE T0 controle du 130223 C10 - x40-16	2.97163	8.63401	5.50994	8.63401	3.03849	5.28311	0.18149	0.18149	1.06661	4.85656	0.829251	0.0158778	0.285	0.892857	103.967	1.19571	0.00272437	0.0748219	2.30663	2.66443
E20 CRE T0 controle du 130223 C10 - x40-17	2.48437	4.92699	2.65582	4.92699	2.42748	3.19286	0.376532	0.376532	1.00966	1.46241	0.593893	0.00727778	0.125	2	28.8843	1.07205	0.00127593	0.199235	1.6771	5.36008
E20 CRE T0 controle du 130223 C10 - x40-2	2.81311	7.19362	34.4648	7.19362	8.47117	1.84772	0.0290151	0.0290151	0.747582	3.82249	0.792638	0.00905556	0.95	20	41.6347	1.09525	0.00125553	0.768234	1.01167	8.5359
E20 CRE T0 controle du 130223 C10 - x40-3	2.74506	6.65156	12.1655	6.65156	3.68944	3.24757	0.0821998	0.0821998	0.937812	2.74419	0.732919	0.00894444	0.376667	1	46.7051	1.09675	0.00140298	0.445823	14.3383	14.8559
E20 CRE T0 controle du 130223 C10 - x40-4	3.00105	8.93141	5.96328	8.93141	4.042	4.86463	0.167693	0.167693	1.09504	4.81221	0.827948	0.0137556	0.476667	1.9375	82.0488	1.18475	0.00218551	0.268123	1.22813	1.762
E20 CRE T0 controle du 130223 C10 - x40-5	2.59117	5.5716	4.68451	5.5716	3.13375	2.9375	0.21347	0.21347	0.933318	2.44245	0.709509	0.0106333	0.111667	1.2	41.0736	1.14363	0.00182775	0.228575	1.20932	6.27179
E20 CRE T0 controle du 130223 C10 - x40-6	3.19339	11.1452	7.56681	11.1452	4.18243	5.31949	0.132156	0.132156	0.976105	5.91051	0.855293	0.0197333	0.653333	0.756098	155.494	1.22585	0.00320016	0.189832	1.54913	1.74859
E20 CRE T0 controle du 130223 C10 - x40-7	2.64791	5.94771	7.30875	5.94771	2.61905	3.34951	0.136822	0.136822	0.91139	4.49231	0.817927	0.0119	0.325	0.857143	41.645	1.13517	0.00212636	0.519462	3.26246	6.31973
E20 CRE T0 controle du 130223 C10 - x40-8	2.3389	4.1672	7.41924	4.1672	2.54898	2.42222	0.134785	0.134785	0.928009	5.20253	0.838776	0.00544444	0.193333	1.33333	21.0438	1.06939	0.000904575	0.486554	3.32208	5.76
E20 CRE T0 controle du 130223 C10 - x40-9	3.03415	9.27837	6.97589	9.27837	3.79324	4.26885	0.143351	0.143351	0.896075	3.38936	0.772176	0.0174111	0.355	1.70588	114.983	1.2165	0.00283815	0.0252619	1.06575	5.26336
E20 CRE T0 controle du 130223 C2 - x40-10	2.41986	4.57428	9.47895	4.57428	2.21622	2.95425	0.105497	0.105497	0.961457	4.1457	0.805663	0.00863333	0.566667	0.235294	33.1246	1.04659	0.00155908	0.868437	15.6794	15.6914
E20 CRE T0 controle du 130223 C2 - x40-11	1.66239	1.91245	0.489321	1.91245	1.08915	2.08108	2.04365	2.04365	1.13564	0.0978723	0.0891473	0.00573333	0	0	0	1.0475	0.00119855	0	2.79287	2.89196
E20 CRE T0 controle du 130223 C2 - x40-12	3.01567	9.08304	28.3294	9.08304	4.5459	3.44915	0.035299	0.035299	0.809638	8.33766	0.892907	0.0159778	1.05167	0.758621	110.106	1.21638	0.00244501	0.392028	2.47581	6.75479
E20 CRE T0 controle du 130223 C2 - x40-13	2.80632	7.13763	4.85983	7.13763	4.84456	3.03475	0.205769	0.205769	0.935828	3.03766	0.752332	0.0107222	0.573333	1.08333	85.4008	1.13385	0.00161334	0.548195	1.2557	1.30449
E20 CRE T0 controle du 130223 C2 - x40-14	2.67527	6.13803	10.9047	6.13803	2.78767	3.12621	0.0917035	0.0917035	0.850375	3.33663	0.769406	0.00973333	0.45	0.571429	51.8828	1.09127	0.0015812	0.318745	22.8066	23.5672
E20 CRE T0 controle du 130223 C2 - x40-15	2.28221	3.90391	10.5869	3.90391	4.27634	1.43534	0.0944562	0.0944562	0.760313	2.04737	0.671848	0.00643333	0.185	4	29.9846	1.01858	0.00100656	0.578844	6.3027	17.4427
E20 CRE T0 controle du 130223 C2 - x40-16	2.42338	4.59286	5.93983	4.59286	2.01333	2.89726	0.168355	0.168355	0.89508	3.1411	0.758519	0.0075	0.208333	0.727273	22.3613	1.07415	0.00133289	0.19245	10.3945	14.3631
E20 CRE T0 controle du 130223 C2 - x40-2	2.67463	6.13354	12.5516	6.13354	4.00423	2.73684	0.0796709	0.0796709	0.892891	5.03285	0.834241	0.0183667	0.885	1.06667	76.5954	1.21168	0.00329275	0.088682	3.87592	9.36633
E20 CRE T0 controle du 130223 C2 - x40-3	2.38604	4.39963	5.9583	4.39963	1.97063	2.75	0.167833	0.167833	0.877444	3.15244	0.759178	0.00756667	0.243333	0.777778	20.5203	1.07538	0.00134678	0.1916	10.21	14.2125
E20 CRE T0 controle du 130223 C2 - x40-4	3.01862	9.11391	15.5285	9.11391	4.6985	4.38931	0.0643978	0.0643978	1.04393	5.84865	0.853986	0.0140778	1.21667	1.25	94.049	1.1633	0.00212931	0.59064	4.16605	4.17939
E20 CRE T0 controle du 130223 C2 - x40-5	2.79911	7.07862	4.61413	7.07862	3.03044	4.05761	0.216726	0.216726	0.997873	3.56805	0.781088	0.0171556	0.291667	0.76	102.74	1.20045	0.00305822	0.143963	1.06473	3.05339
E20 CRE T0 controle du 130223 C2 - x40-6	2.57559	5.47254	2.28028	5.47254	2.92802	3.15736	0.438542	0.438542	0.987238	2.22257	0.689689	0.0114222	0.103333	0.6875	54.1834	1.1337	0.00209973	0.220541	2.194	2.7139
E20 CRE T0 controle du 130223 C2 - x40-7	2.85639	7.5612	4.20391	7.5612	2.68614	4.55285	0.237874	0.237874	0.986862	3.15714	0.75945	0.0194	0.546667	0.6	97.1953	1.21806	0.00365498	0.0986739	3.45465	3.52456
E20 CRE T0 controle du 130223 C2 - x40-8	2.9216	8.15075	11.9105	8.15075	3.49578	4.58304	0.0839597	0.0839597	1.0513	7.32645	0.879901	0.0223889	1.67833	0.725	127.256	1.25515	0.00400176	0.718421	3.38792	3.4297
E20 CRE T0 controle du 130223 C2 - x40-9	3.04853	9.43323	24.2389	9.43323	6.16984	3.5861	0.041256	0.041256	0.944277	5.88525	0.854762	0.014	1.145	1.21053	93.3045	1.1875	0.00199018	0.517932	5.15244	5.23177
E20 CRE T0 controle du 130223 C3 - x40-10	1.77994	2.1896	0.614214	2.1896	1.14332	2.125	1.6281	1.6281	1.03772	0.542714	0.351792	0.00341111	0	0	0.592593	0.938573	0.00064471	0.057073	1.11036	2.08264
E20 CRE T0 controle du 130223 C3 - x40-2	3.1736	10.8942	20.8748	10.8942	7.20958	4.11798	0.0479046	0.0479046	1.01494	6.58421	0.868147	0.0160111	1.73667	1.35294	111.811	1.20741	0.00228532	0.944321	2.24725	2.41523
E20 CRE T0 controle du 130223 C3 - x40-3	3.08845	9.8769	30.8736	9.8769	4.9794	4.175	0.0323901	0.0323901	0.943244	7.32	0.879808	0.0161778	1.42	1.875	85.5277	1.1961	0.00246053	0.0786214	15.1136	15.584
E20 CRE T0 controle du 130223 C3 - x40-4	2.83636	7.38881	13.2379	7.38881	3.58636	3.30638	0.0755408	0.0755408	0.847433	4.4321	0.815909	0.00977778	0.676667	1.25	71.1365	1.11244	0.0015438	0.449747	2.36387	9.55624
E20 CRE T0 controle du 130223 C3 - x40-5	2.46672	4.82787	11.6592	4.82787	2.8783	2.01058	0.0857693	0.0857693	0.706536	2.82171	0.738337	0.00547778	0.266667	1.75	24.794	0.98345	0.000841834	0.669534	10.631	28.1077
E20 CRE T0 controle du 130223 C3 - x40-6	2.78122	6.93432	15.0797	6.93432	3.21328	3.29787	0.0663141	0.0663141	0.85252	4.23158	0.808853	0.0110444	0.656667	1.58333	53.2948	1.13084	0.00178052	0.387168	13.4044	18.1576
E20 CRE T0 controle du 130223 C3 - x40-7	3.00515	8.97368	8.12924	8.97368	4.42031	4.53689	0.123013	0.123013	1.06295	4.04583	0.801817	0.0134556	0.325	2.45455	86.0154	1.16685	0.00200968	0.363486	2.58377	2.58477
E20 CRE T0 controle du 130223 C3 - x40-8	2.24476	3.73918	1.95447	3.73918	1.97608	2.5566	0.511647	0.511647	0.961145	2.00719	0.667464	0.00464444	0.0233333	1.5	15.6129	1.0304	0.000802144	0.0691714	1.8026	2.69034
E20 CRE T0 controle du 130223 C3 - x40-9	2.94885	8.41051	14.0051	8.41051	4.28395	3.77444	0.0714026	0.0714026	0.928864	4.78571	0.82716	0.0126	1.06833	0.772727	84.1802	1.16825	0.00196694	0.535347	2.76307	9.83956
E20 CRE T0 controle du 130223 C4 - x40-10	2.89458	7.90104	3.35599	7.90104	3.52063	4.20472	0.297975	0.297975	0.998536	2.50361	0.71458	0.0161556	0.316667	1.82353	71.2069	1.21029	0.00285662	0.0586412	1.65211	3.00832
E20 CRE T0 controle du 130223 C4 - x40-11	2.89332	7.88962	8.75998	7.88962	3.85714	3.90459	0.114156	0.114156	0.97197	3.97134	0.798847	0.0173444	0.566667	1.05	108.6	1.22021	0.00287223	0.129058	3.19719	5.01253
E20 CRE T0 controle du 130223 C4 - x40-12	2.20142	3.55718	4.05668	3.55718	1.64368	2.45794	0.246507	0.246507	0.885879	1.62048	0.618391	0.00483333	0.123333	1.25	8.92565	1.03552	0.000834959	0.625144	14.8218	17.6365
E20 CRE T0 controle du 130223 C4 - x40-2	2.86711	7.65505	8.55728	7.65505	4.24084	3.82677	0.11686	0.11686	1.02946	2.77353	0.734996	0.0142556	1.04667	1.54545	58.5631	1.16657	0.00250145	0.537016	4.26298	5.5055
E20 CRE T0 controle du 130223 C4 - x40-3	2.55373	5.33652	3.36603	5.33652	3.46753	2.6631	0.297086	0.297086	0.929266	2.13575	0.681097	0.0077	0.055	1	31.0191	1.06412	0.00128059	0.107443	2.79483	2.80944
E20 CRE T0 controle du 130223 C4 - x40-4	3.02288	9.15869	10.4077	9.15869	3.63309	4.88476	0.0960825	0.0960825	1.01659	8.86747	0.898657	0.0182	0.805	0.513514	130.925	1.21522	0.0031223	0.247083	2.11545	2.18272
E20 CRE T0 controle du 130223 C4 - x40-5	2.07361	3.07045	0.867948	3.07045	1.5024	2.5814	1.15214	1.15214	1.0305	0.606178	0.377404	0.00462222	0.025	1.5	4.30573	1.00926	0.000869516	0.138675	1.24135	2.43593
E20 CRE T0 controle du 130223 C4 - x40-6	3.1964	11.1839	19.7616	11.1839	5.36557	5.17697	0.0506031	0.0506031	1.07224	9.8593	0.907913	0.0240111	1.93	1.44737	184.712	1.27686	0.00357	0.560954	2.40446	2.40912
E20 CRE T0 controle du 130223 C4 - x40-7	2.87963	7.76627	3.10292	7.76627	2.71654	4.74194	0.322277	0.322277	1.00635	2.69577	0.72942	0.0155222	0.226667	0.619048	81.3974	1.18113	0.00281398	0.372651	2.29653	2.31161
E20 CRE T0 controle du 130223 C4 - x40-8	3.05042	9.45376	6.38987	9.45376	4.36046	5.07435	0.156498	0.156498	1.12084	4.66212	0.823388	0.0184333	0.42	1.12	105.71	1.24149	0.00306609	0.0736543	1.25151	2.01193
E20 CRE T0 controle du 130223 C4 - x40-9	2.35253	4.2331	3.27057	4.2331	2.79066	2.2931	0.305757	0.305757	0.904939	0.910811	0.476662	0.00785556	0.16	8	29.0831	1.05112	0.00140578	0.376089	6.41062	8.06545
E20 CRE T0 controle du 130223 C5 - x40-1	3.23426	11.6822	14.7295	11.6822	5.09178	5.48955	0.0678909	0.0678909	1.06035	7.92308	0.887931	0.0219111	1.24667	1.22857	169.01	1.25695	0.00333232	0.5	2.37166	2.42337
E20 CRE T0 controle du 130223 C5 - x40-3	3.06068	9.5661	14.2484	9.5661	5.65458	4.02532	0.0701835	0.0701835	1.00061	6.17857	0.860697	0.0156333	0.816667	1.1875	97.7176	1.20478	0.00237468	0.572405	1.56757	1.81211
E20 CRE T0 controle du 130223 C5 - x40-4	3.03703	9.30914	24.6692	9.30914	4.57182	3.81469	0.0405364	0.0405364	0.87618	7.6746	0.884721	0.0121444	0.581667	0.961538	98.7394	1.16909	0.00173258	0.273903	1.8709	9.25777
E20 CRE T0 controle du 130223 C5 - x40-5	2.69084	6.24904	5.94527	6.24904	2.76507	3.47664	0.168201	0.168201	0.925122	3.64198	0.784574	0.0125333	0.436667	1.875	47.9503	1.152	0.00215006	0.549016	2.75955	4.21747
E20 CRE T0 controle du 130223 C5 - x40-6	3.01297	9.05483	19.1558	9.05483	4.38216	3.98718	0.0522036	0.0522036	0.921784	5.85845	0.854194	0.0166889	1.16167	1.15385	98.781	1.20917	0.00269359	0.619265	6.6031	12.6767
E20 CRE T0 controle du 130223 C5 - x40-7	2.93198	8.24868	8.7913	8.24868	4.43298	3.78992	0.113749	0.113749	0.96737	3.62419	0.783746	0.0237889	1.07167	0.956522	120.679	1.26	0.00421457	0.241628	1.96775	6.58345
E20 CRE T0 controle du 130223 C5 - x40-8	2.87841	7.75531	12.1223	7.75531	4.12551	3.43929	0.0824924	0.0824924	0.900758	4.92754	0.831296	0.0136333	0.696667	1.77778	58.3686	1.16654	0.00215022	0.400692	5.20727	5.26615
E20 CRE T0 controle du 130223 C6 - x40-10	2.91962	8.13217	5.60728	8.13217	4.30284	3.6888	0.17834	0.17834	0.940927	3.11688	0.757098	0.0105667	0.236667	2.3	60.0889	1.13816	0.00164776	0.0648544	1.00789	3.23984
E20 CRE T0 controle du 130223 C6 - x40-11	2.88099	7.77844	7.57594	7.77844	3.77368	3.84711	0.131997	0.131997	0.960782	3.48819	0.777193	0.0126667	0.85	1.29412	70.5418	1.13854	0.00207761	0.731497	3.91438	4.19355
E20 CRE T0 controle du 130223 C6 - x40-12	2.76691	6.82102	6.26456	6.82102	3.45421	3.47162	0.159628	0.159628	0.945925	4.17225	0.80666	0.0120111	0.435	1.66667	62.7936	1.18027	0.00196659	0.250808	1.04804	3.76161
E20 CRE T0 controle du 130223 C6 - x40-13	2.58563	5.53618	8.02167	5.53618	2.93242	2.78423	0.124662	0.124662	0.861208	3.44487	0.775021	0.0129889	0.243333	0.916667	34.9713	1.14714	0.00242891	0.374554	1.41849	7.8725
E20 CRE T0 controle du 130223 C6 - x40-2	2.97084	8.62609	40.8507	8.62609	6.15541	3.4359	0.0244794	0.0244794	0.988223	13.9878	0.933279	0.0136556	1.25167	1.1	83.7838	1.15831	0.00207096	0.436347	3.04788	3.64357
E20 CRE T0 controle du 130223 C6 - x40-3	2.8544	7.54385	5.70021	7.54385	4.57357	3.904	0.175432	0.175432	1.10674	2.91765	0.744745	0.0148	0.456667	0.928571	93.1613	1.16715	0.00251487	0.41824	2.26268	2.3081
E20 CRE T0 controle du 130223 C6 - x40-4	2.12585	3.26077	2.59916	3.26077	2.26502	2.13178	0.38474	0.38474	0.983919	0.945017	0.485866	0.00628889	0.1	1.33333	13.9782	1.03894	0.00113034	0.438839	4.25533	7.1392
E20 CRE T0 controle du 130223 C6 - x40-5	2.41582	4.55308	6.24645	4.55308	2.45763	2.53977	0.160091	0.160091	0.874476	3.76398	0.790091	0.00852222	0.131667	2.5	14.5809	1.07036	0.00156345	0.148877	4.54277	6.19068
E20 CRE T0 controle du 130223 C6 - x40-6	2.75588	6.73494	3.98334	6.73494	3.5823	3.41606	0.251045	0.251045	0.960003	3.12064	0.757319	0.0170778	0.36	1.25	53.6942	1.18843	0.00311618	0.331594	2.04886	2.17131
E20 CRE T0 controle du 130223 C6 - x40-7	2.9546	8.4663	16.379	8.4663	3.7933	3.97727	0.0610537	0.0610537	0.914956	6.94805	0.874183	0.0136	0.705	1.2	78.5981	1.16176	0.00211261	0.611037	1.39822	7.44462
E20 CRE T0 controle du 130223 C6 - x40-8	2.49755	5.00231	2.60854	5.00231	3.32952	2.60664	0.383357	0.383357	0.950826	0.82197	0.451143	0.0106889	0.206667	5.5	15.8733	1.1013	0.00204635	0.144187	8.50739	8.64481
E20 CRE T0 controle du 130223 C6 - x40-9	2.74083	6.61925	2.1274	6.61925	2.7095	4	0.470056	0.470056	0.994709	2.17529	0.685068	0.0122778	0.158333	2.5	53.3699	1.13399	0.00223515	0.248069	1.48251	1.88828
E20 CRE T0 controle du 130223 C7 - x40-2	2.43109	4.6338	2.27586	4.6338	3.4863	2.11151	0.439395	0.439395	0.85082	0.667102	0.400157	0.0141889	0.318333	6	38.3562	1.16009	0.0028969	0.139918	6.15657	6.18411
E20 CRE T0 controle du 130223 C7 - x40-3	3.07686	9.74595	15.4483	9.74595	4.10791	4.46519	0.0647321	0.0647321	0.928595	7.73298	0.885492	0.0185333	0.686667	0.648649	132.87	1.22752	0.0030194	0.0346272	3.01674	5.03985
E20 CRE T0 controle du 130223 C7 - x40-4	2.59843	5.61839	7.30636	5.61839	3.45139	3.1039	0.136867	0.136867	1.02634	5.06316	0.835069	0.0064	0.105	1.5	24.7006	1.02418	0.00100882	0.294628	2.36186	2.36437
E20 CRE T0 controle du 130223 C7 - x40-5	3.0207	9.13582	26.3338	9.13582	6.13127	3.45679	0.037974	0.037974	0.936916	7.36364	0.880435	0.0132889	1.54333	2.30769	88.9231	1.16676	0.00194419	0.233126	1.54618	6.33312
E20 CRE T0 controle du 130223 C7 - x40-6	2.59458	5.59355	4.12983	5.59355	3.22696	3	0.24214	0.24214	0.963453	2.23757	0.691126	0.00651111	0.211667	1.66667	26.1951	1.02868	0.00107386	0.206548	3.00915	3.02735
E20 CRE T0 controle du 130223 C7 - x40-7	2.87704	7.7431	37.9423	7.7431	4.61513	3.53219	0.0263558	0.0263558	0.979988	14.7719	0.936596	0.00998889	0.353333	2.25	47.5059	1.1079	0.00154419	0.166759	5.45677	6.04928
E20 CRE T0 controle du 130223 C7 - x40-8	2.67632	6.14544	7.09894	6.14544	2.96652	3.06989	0.140866	0.140866	0.860387	3.18902	0.761281	0.00763333	0.216667	1	32.3136	1.05794	0.00123889	0.392803	4.02227	6.24767
E20 CRE T0 controle du 130223 C7 - x40-9	2.77233	6.86376	7.10652	6.86376	3.29626	3.54286	0.140716	0.140716	0.937135	3.47368	0.776471	0.0103889	0.261667	0.923077	42.1832	1.12115	0.00173115	0.0731272	3.63338	4.29886
E20 CRE T0 controle du 130223 C8 - x40-10	2.47819	4.89203	3.83515	4.89203	2.58738	3.17117	0.260746	0.260746	1.0427	2.14504	0.682039	0.00457778	0.0116667	2	14.1246	1.03734	0.00070502	0.394132	2.51436	2.51579
E20 CRE T0 controle du 130223 C8 - x40-11	2.48436	4.92694	5.57738	4.92694	2.43625	3.06832	0.179296	0.179296	0.972042	3.5977	0.7825	0.00888889	0.171667	0.875	26.5831	1.0826	0.00156839	0.514782	1.87874	4.52213
E20 CRE T0 controle du 130223 C8 - x40-12	3.05307	9.48268	6.77116	9.48268	4.90458	3.98599	0.147685	0.147685	0.930907	5.4	0.84375	0.0199111	0.723333	0.888889	129.209	1.22383	0.00339149	0.188982	1.22139	1.59034
E20 CRE T0 controle du 130223 C8 - x40-13	3.03982	9.3391	6.5921	9.3391	3.08542	5.39823	0.151697	0.151697	1.01532	5.92857	0.85567	0.0150889	0.515	0.580645	107.845	1.17772	0.00249749	0.250184	1.36428	1.82248
E20 CRE T0 controle du 130223 C8 - x40-14	2.69911	6.30888	19.561	6.30888	3.61285	2.94652	0.0511222	0.0511222	0.887734	7.92647	0.887974	0.00674444	0.42	1.16667	28.5269	1.06468	0.00103565	0.493783	2.32121	5.25637
E20 CRE T0 controle du 130223 C8 - x40-15	2.73692	6.58957	15.6487	6.58957	4.53774	2.8631	0.063903	0.063903	0.925546	5.14493	0.837264	0.00471111	0.255	1.8	37.9042	0.99003	0.000575259	0.447741	4.56175	4.91358
E20 CRE T0 controle du 130223 C8 - x40-16	2.11266	3.21162	3.39501	3.21162	1.82889	2.12587	0.29455	0.29455	0.895174	2.34742	0.701262	0.00792222	0.0333333	0	5	1.07266	0.00155603	0.339127	4.49532	6.80326
E20 CRE T0 controle du 130223 C8 - x40-17	2.63103	5.83325	3.77943	5.83325	2.8627	3.40758	0.26459	0.26459	0.988378	3.56226	0.780811	0.0134333	0.27	0.923077	48.0604	1.14581	0.00248486	0.143799	1.45158	1.87876
E20 CRE T0 controle du 130223 C8 - x40-18	2.89018	7.86113	7.65223	7.86113	6.17391	3.50347	0.130681	0.130681	1.10737	3.92857	0.797101	0.0145667	0.51	2.14286	77.7273	1.1745	0.0022183	0.288345	1.00045	1.26879
E20 CRE T0 controle du 130223 C8 - x40-19	2.79333	7.03169	18.7988	7.03169	3.75622	3.47584	0.0531948	0.0531948	0.958021	7.375	0.880597	0.0156333	0.526667	2	51.6618	1.19948	0.00263146	0.38449	3.604	7.0925
E20 CRE T0 controle du 130223 C8 - x40-2	3.0551	9.50487	23.4446	9.50487	5.23011	3.39651	0.0426538	0.0426538	0.817226	5.78008	0.852509	0.0181556	1.29167	1.04762	105.304	1.23122	0.00288304	0.180099	2.4441	14.6901
E20 CRE T0 controle du 130223 C8 - x40-3	3.0547	9.50046	6.04376	9.50046	3.62639	5.3029	0.16546	0.16546	1.06293	5.05042	0.834722	0.016	0.528333	1.04	120.766	1.19582	0.00257334	0.0790569	1.39364	1.78827
E20 CRE T0 controle du 130223 C8 - x40-4	3.05539	9.50803	21.8373	9.50803	3.46481	5.81333	0.0457933	0.0457933	1.13808	22.1692	0.956839	0.0167333	0.755	1.02941	134.963	1.22494	0.00257916	0.63172	1.01518	1.60852
E20 CRE T0 controle du 130223 C8 - x40-5	2.98346	8.75237	11.0645	8.75237	4.50094	4.18595	0.0903794	0.0903794	1.01466	5.58025	0.84803	0.0118444	0.633333	1.47059	94.3186	1.15403	0.00169781	0.824689	1.16231	2.02431
E20 CRE T0 controle du 130223 C8 - x40-6	2.4417	4.69076	2.43894	4.69076	2.39024	3.45669	0.410015	0.410015	1.1393	1.65019	0.622669	0.00774444	0.138333	0.727273	29.9447	1.1298	0.00139881	0.267836	2.8909	3.13078
E20 CRE T0 controle du 130223 C8 - x40-7	2.46223	4.80296	8.28408	4.80296	2.91954	2.79856	0.120713	0.120713	0.995595	5.86842	0.854406	0.0058	0.085	1.25	31.2197	1.03233	0.000938319	0.0437688	2.47895	3.52788
E20 CRE T0 controle du 130223 C8 - x40-8	2.84428	7.45647	12.8964	7.45647	3.74186	3.55405	0.077541	0.077541	0.922008	7.73529	0.885522	0.0099	0.581667	0.866667	67.6312	1.10368	0.00151158	0.523306	3.65523	4.23645
E20 CRE T0 controle du 130223 C8 - x40-9	1.95407	2.67566	1.10565	2.67566	1.74839	2.03659	0.904443	0.904443	1.00645	0.812865	0.448387	0.00344444	0.0233333	2	4.86331	0.962238	0.000586315	0.170389	1.61861	2.3179
E20 CRE T0 controle du 130223 C9 - x40-10	2.98776	8.79578	9.04135	8.79578	4.875	4.09402	0.110603	0.110603	1.02769	4.45665	0.816737	0.0104889	0.378333	1.81818	62.7756	1.13962	0.00152703	0.0650945	1.24327	2.29883
E20 CRE T0 controle du 130223 C9 - x40-11	2.92453	8.17827	6.18048	8.17827	4.45415	3.84706	0.1618	0.1618	0.992773	3.7314	0.788646	0.0127222	0.361667	1.3	46.9945	1.14074	0.00208374	0.132164	1.10227	1.42001
E20 CRE T0 controle du 130223 C9 - x40-12	2.72761	6.51929	9.12708	6.51929	3.66302	3.52404	0.109564	0.109564	1.03457	4.84884	0.829026	0.0111778	0.816667	1.38462	46.0624	1.12118	0.00186996	0.790727	2.59061	4.3824
E20 CRE T0 controle du 130223 C9 - x40-13	2.80637	7.13805	9.61945	7.13805	4.23128	3.18067	0.103956	0.103956	0.916591	3.45274	0.775419	0.00994444	0.456667	1.85714	46.1686	1.12446	0.00149102	0.170441	2.14136	3.853
E20 CRE T0 controle du 130223 C9 - x40-14	3.03645	9.30298	6.18941	9.30298	3.22795	5.14179	0.161566	0.161566	0.993015	7.04608	0.875716	0.0194	0.391667	0.638889	118.133	1.24979	0.00338769	0.311115	1.32393	1.49932
E20 CRE T0 controle du 130223 C9 - x40-2	2.86942	7.67546	9.31457	7.67546	3.72366	3.59438	0.107359	0.107359	0.903658	4.94505	0.831793	0.0120222	0.458333	1	72.25	1.14841	0.00193485	0.4902	2.95949	3.90949
E20 CRE T0 controle du 130223 C9 - x40-3	2.00717	2.84433	2.57412	2.84433	1.6573	1.82031	0.388483	0.388483	0.823885	0.847751	0.458801	0.00593333	0.0166667	2	6.20816	0.988255	0.00109929	0.220656	12.1642	17.7771
E20 CRE T0 controle du 130223 C9 - x40-4	3.01119	9.03628	9.29674	9.03628	4.43042	4.25105	0.107565	0.107565	0.990212	3.83654	0.793241	0.0111778	0.213333	0.941176	86.6779	1.13391	0.00170434	0.20188	5.71988	5.83694
E20 CRE T0 controle du 130223 C9 - x40-5	2.79284	7.02774	11.4414	7.02774	5.20764	2.82591	0.0874019	0.0874019	0.917621	2.75598	0.733758	0.00872222	0.731667	3.75	40.6406	1.08728	0.00128954	1.10701	5.82962	10.1842
E20 CRE T0 controle du 130223 C9 - x40-6	2.00469	2.83621	0.820282	2.83621	1.53378	2.5102	1.21909	1.21909	1.09611	0.68375	0.406088	0.0149667	0	0.5	11.7002	1.16279	0.00343228	0.0861621	1.74167	2.72574
E20 CRE T0 controle du 130223 C9 - x40-7	3.18842	11.0817	19.0777	11.0817	5.83101	4.93851	0.0524172	0.0524172	1.07613	7.1129	0.87674	0.0167667	0.915	1.5625	116.741	1.20194	0.00241018	0.499834	3.58079	3.59565
E20 CRE T0 controle du 130223 C9 - x40-8	2.80341	7.11374	2.83414	7.11374	3.79984	3.47471	0.35284	0.35284	0.952145	1.97862	0.664274	0.0139333	0.215	1.44444	68	1.15108	0.00248214	0.126289	1.02233	2.45863
E20 CRE T0 controle du 130223 C9 - x40-9	2.82753	7.31408	6.53722	7.31408	3.04192	4.173	0.15297	0.15297	0.99509	4.05208	0.802062	0.0161667	0.988333	0.65	71.0746	1.21385	0.00294991	0.519053	6.07663	6.32425
E3 mutant NT x40-1-1	2.8167	7.22349	3.63911	7.22349	3.3338	3.86056	0.274792	0.274792	0.975826	1.85259	0.649441	0.0159111	0.105	2.8	47.4194	1.19924	0.00284441	0.134746	1.23088	3.30017
E3 mutant NT x40-1-2	2.90211	7.96988	6.95575	7.96988	4.33362	4.12446	0.143766	0.143766	1.07731	3.39924	0.772688	0.0128556	0.633333	4.2	53.6477	1.14685	0.00197009	0.503231	2.22097	2.22717
E3 mutant NT x40-1-3	2.96348	8.55336	9.51421	8.55336	4.41795	3.42517	0.105106	0.105106	0.841697	1.98916	0.665458	0.0122556	0.76	3.42857	61.8106	1.16043	0.00187786	0.385597	4.55726	10.3662
E3 mutant NT x40-1-4	2.77545	6.88844	9.25535	6.88844	4.07646	3.41877	0.108046	0.108046	1.00205	4.59108	0.821144	0.0167111	1.08333	1.42857	42.834	1.18261	0.00291389	0.52148	1.2859	2.69236
E3 mutant NT x40-1-5	3.03605	9.29863	10.0288	9.29863	4.63538	4.34884	0.0997132	0.0997132	1.00693	3.35635	0.77045	0.0175222	0.643333	1.75	85.8675	1.2139	0.00284215	0.0796314	5.75888	5.9982
E3 mutant NT x40-1-6	3.08974	9.89155	13.0759	9.89155	4.0435	5.06536	0.0764764	0.0764764	1.02973	9.73626	0.906858	0.0217111	0.906667	1.40909	119.413	1.25248	0.00349946	0.249872	1.3	2.26667
E3 mutant NT x40-1-7	2.51516	5.10475	9.86719	5.10475	3.12312	2.55191	0.101346	0.101346	0.883457	3.7234	0.788288	0.0074	0.243333	1.25	20.6019	1.05599	0.00124232	0.527046	4.94415	10.7097
E3 mutant NT x40-2-1	2.95666	8.48645	21.1284	8.48645	6.86339	2.90735	0.0473298	0.0473298	0.897512	3.91935	0.796721	0.0101667	0.416667	16	40.5816	1.12334	0.00147437	0.516398	1.26366	4.84886
E3 mutant NT x40-2-2	2.65146	5.9721	4.54427	5.9721	2.31122	4.08861	0.220057	0.220057	1.0408	4.17284	0.806683	0.0232778	0.665	0.909091	58.3408	1.25713	0.00464294	0.511444	2.83819	2.92907
E3 mutant NT x40-2-3	2.73964	6.61021	16.4116	6.61021	5.70395	2.525	0.0609327	0.0609327	0.912292	4.689	0.824222	0.0132111	1.05	1.125	57.3153	1.14126	0.00214076	0.667017	1.76154	4.81649
E3 mutant NT x40-2-4	2.9282	8.21284	10.6702	8.21284	4.71449	3.7099	0.0937194	0.0937194	0.980813	6.70166	0.870158	0.0154889	0.69	0.9375	76.69	1.18906	0.0025055	0.401754	1.111	1.40864
E3 mutant NT x40-2-5	2.68841	6.23161	3.22015	6.23161	3.75072	3.25296	0.310544	0.310544	1.01097	1.91597	0.657061	0.0154222	0.128333	2.5	40.0011	1.18198	0.00290635	0.075919	1.0839	3.53653
E3 mutant NT x40-2-6	3.02081	9.13698	14.9859	9.13698	7.74984	3.01425	0.0667295	0.0667295	0.918382	4.54152	0.819544	0.0170556	1.07833	4.44444	81.399	1.20913	0.00251219	0.178667	1.61122	2.20723
E3 mutant NTx40-10-1	2.66121	6.03946	7.69429	6.03946	4.34936	2.81116	0.129967	0.129967	0.970732	3.65672	0.785256	0.0104	0.353333	14	28.6054	1.11439	0.00171286	0.103362	1.15225	3.64775
E3 mutant NTx40-10-2	2.85229	7.52554	16.8274	7.52554	4.30769	3.6696	0.0594269	0.0594269	1.01205	7.62832	0.884103	0.0108333	0.721667	1.5	41.4397	1.10431	0.00166757	1.16883	1.10662	2.22344
E3 mutant NTx40-10-3	3.03079	9.2425	10.2561	9.2425	4.80317	4.0807	0.0975033	0.0975033	0.96763	4.91549	0.830952	0.014	0.565	2.66667	81.4365	1.16287	0.00218858	0.278887	1.0356	3.1067
E3 mutant NTx40-10-4	2.79298	7.02884	17.3621	7.02884	5.36548	2.95094	0.0575968	0.0575968	0.972482	4.10363	0.804061	0.0109444	0.448333	1.42857	44.6263	1.12461	0.00170364	0.414214	6.72454	7.86086
E3 mutant NTx40-10-5	2.77547	6.88856	11.141	6.88856	3.30054	3.42466	0.0897582	0.0897582	0.903194	3.88921	0.795468	0.0186333	1.31333	1.23077	44.2646	1.22981	0.00348021	1.09751	4.01014	13.0213
E3 mutant NTx40-10-6	2.67561	6.14047	3.88555	6.14047	2.54386	3.40385	0.257363	0.257363	0.884127	1.74129	0.635209	0.0183667	0.395	0.625	39.2467	1.19272	0.00351276	0.278271	3.46467	5.06911
E3 mutant NTx40-10-7	2.60329	5.64987	4.55811	5.64987	3.4095	2.88144	0.219389	0.219389	0.94171	3.58235	0.781772	0.00865556	0.0533333	1.6	27.3251	1.05697	0.0014659	0.143315	1.04242	2.00847
E3 mutant NTx40-10-8	2.29396	3.95706	15.1583	3.95706	2.59178	2.08242	0.0659704	0.0659704	0.847216	5.18644	0.838356	0.00811111	0.25	1.66667	19.0588	1.07802	0.00142865	0.636773	14.8118	18.9247
E3 mutant NTx40-10-9	1.98438	2.77068	3.7944	2.77068	1.50256	2.03311	0.263546	0.263546	0.899479	1.46717	0.594678	0.0108556	0.025	0	1.65404	1.09876	0.00226644	0.647806	9.63418	16.4427
E3 mutant NTx40-11-1	3.0217	9.14627	26.5957	9.14627	6.55569	3.21921	0.0376001	0.0376001	0.901187	8.12921	0.890462	0.0180556	1.17667	1.11111	93.0815	1.22098	0.00272523	0.102282	1.78677	2.51845
E3 mutant NTx40-11-10	2.92942	8.22441	19.4709	8.22441	6.70301	2.90826	0.0513588	0.0513588	0.915509	6.5461	0.867481	0.0118222	0.646667	4.75	64.5027	1.13451	0.0017024	0.0685511	1.07187	3.5613
E3 mutant NTx40-11-2	2.82626	7.30338	3.42898	7.30338	3.81327	3.6121	0.291632	0.291632	0.965794	2.22222	0.689655	0.0170778	0.623333	0.933333	60.8642	1.19546	0.00317832	0.515852	1.21123	2.16651
E3 mutant NTx40-11-3	2.72458	6.49662	6.56093	6.49662	3.52645	3.35622	0.152417	0.152417	0.970136	2.2117	0.688638	0.0128111	0.681667	1.09091	52.4131	1.16003	0.00219773	0.543031	4.97484	5.44621
E3 mutant NTx40-11-4	2.62185	5.77191	4.21284	5.77191	3.91487	3.11957	0.23737	0.23737	1.06938	2.23868	0.691233	0.00874444	0.498333	2.5	34.5018	1.08233	0.00138775	0.587891	1.39932	1.51411
E3 mutant NTx40-11-5	2.10138	3.17018	2.89752	3.17018	1.84205	2.15	0.345122	0.345122	0.920461	0.948025	0.48666	0.0104111	0.131667	0	6.16009	1.07263	0.00213447	0.380978	11.0146	13.2168
E3 mutant NTx40-11-6	2.47796	4.89073	2.50489	4.89073	2.68277	3.16837	0.399218	0.399218	1.0611	1.52063	0.603274	0.0142556	0.2	3.5	15.0698	1.16916	0.00281317	0.279182	3.00407	3.02319
E3 mutant NTx40-11-7	2.23768	3.70881	1.38825	3.70881	2.06692	2.51701	0.720334	0.720334	0.97569	0.736842	0.424242	0.0088	0.131667	4	12.1905	1.04802	0.0017935	0.150756	4.0127	4.35803
E3 mutant NTx40-11-8	2.5187	5.1256	3.66708	5.1256	2.65692	3.30682	0.272696	0.272696	1.05161	3.00781	0.750487	0.0114	0.23	1.6	24.0208	1.13171	0.00211181	0.468293	2.11336	2.15393
E3 mutant NTx40-11-9	2.74707	6.667	8.81876	6.667	3.80861	3.33624	0.113395	0.113395	0.976587	7.29365	0.879426	0.0116111	0.375	0.692308	44.8411	1.14809	0.00193991	0.218739	1.33165	1.33315
E3 mutant NTx40-3-1	2.78647	6.97636	12.6875	6.97636	4.58246	2.88927	0.078818	0.078818	0.886561	3.50593	0.77807	0.0126667	0.678333	2	38.5851	1.15163	0.00214901	0.374634	5.96253	5.98086
E3 mutant NTx40-3-2	2.66554	6.06967	5.82317	6.06967	4.7668	2.68889	0.171728	0.171728	0.967211	1.97647	0.664032	0.00562222	0.256667	8	20.503	1.00171	0.00083653	0.320573	1.50129	2.49744
E3 mutant NTx40-3-3	2.52161	5.14281	11.4095	5.14281	4.19173	2.10204	0.0876461	0.0876461	0.836829	3.07143	0.754386	0.00886667	0.458333	4.5	23.9203	1.11019	0.00143498	0.864215	5.59783	8.18441
E3 mutant NTx40-3-4	2.47249	4.86004	2.52355	4.86004	2.76257	2.64943	0.396268	0.396268	0.906085	1.62271	0.618715	0.00795556	0.213333	1.6	19.5237	1.06029	0.00143639	0.250697	2.65522	3.17961
E3 mutant NTx40-3-5	2.94879	8.4099	10.6513	8.4099	5.06961	3.4359	0.0938855	0.0938855	0.919892	4.13095	0.805104	0.0143667	0.705	1.46154	68.4813	1.1624	0.00235562	0.162159	1.77497	4.7484
E3 mutant NTx40-3-6	2.60892	5.68661	8.82473	5.68661	3.51556	2.75377	0.113318	0.113318	0.90797	2.19913	0.687415	0.00821111	0.476667	2	29.2992	1.06571	0.0013571	0.676295	7.17774	15.6466
E3 mutant NTx40-3-7	2.61952	5.75647	5.96637	5.75647	3.04551	3.16754	0.167606	0.167606	0.960275	2.72458	0.731513	0.00976667	0.35	1.28571	29.1897	1.10665	0.00171114	0.769143	3.96323	8.14609
E3 mutant NTx40-3-8	2.36878	4.31304	1.58591	4.31304	2.82298	2.55263	0.630553	0.630553	0.994394	0.664083	0.399068	0.00715556	0.0566667	8	12.642	1.03536	0.00134167	0.212205	3.55663	3.69695
E3 mutant NTx40-3-9	1.96513	2.70994	0.754133	2.70994	1.38873	2.2625	1.32603	1.32603	0.983872	0.49789	0.332394	0.00394444	0.00833333	0	1.66102	0.980728	0.000740043	0.0530745	1.26484	2.48536
E3 mutant NTx40-4-1	2.76655	6.81823	2.40209	6.81823	2.87812	4.14884	0.416304	0.416304	1.03231	2.51031	0.715125	0.0151333	0.371667	0.941176	57.6684	1.18736	0.00280689	0.424126	1.22841	1.27745
E3 mutant NTx40-4-10	2.74154	6.6247	2.10516	6.6247	2.86794	4.01389	0.475024	0.475024	1.02609	2.06982	0.674248	0.0151444	0.388333	1	62.6768	1.18076	0.00280561	0.363403	1.22654	1.27845
E3 mutant NTx40-4-11	2.97522	8.6697	15.1861	8.6697	6.15253	3.41696	0.0658495	0.0658495	0.977604	4.38043	0.814141	0.011	0.838333	2.5	68.5174	1.12347	0.001549	1.1913	1.72004	2.07908
E3 mutant NTx40-4-12	2.45588	4.76797	9.6941	4.76797	3.01906	2.52174	0.103156	0.103156	0.918974	4.15179	0.805893	0.00641111	0.186667	2.66667	11.4602	1.04371	0.00107751	0.394942	7.0615	7.98283
E3 mutant NTx40-4-13	2.79242	7.02436	5.69608	7.02436	4.29644	3.50431	0.175559	0.175559	1.03407	3.31579	0.768293	0.0118444	0.381667	4	36.5433	1.14551	0.00193227	0.389833	1.37524	1.689
E3 mutant NTx40-4-14	2.37786	4.35838	2.25091	4.35838	2.0428	2.93836	0.444264	0.444264	0.96359	1.5114	0.601816	0.00856667	0.135	2.33333	10.5603	1.04546	0.00162366	0.180071	4.29106	4.77608
E3 mutant NTx40-4-15	2.4669	4.82888	10.5718	4.82888	2.60963	2.81879	0.094591	0.094591	0.942989	3.23944	0.76412	0.00668889	0.551667	1.125	26.3043	1.02516	0.0010922	1.10119	14.8918	14.9413
E3 mutant NTx40-4-2	2.32416	4.09709	3.10812	4.09709	2.08255	2.80916	0.321738	0.321738	0.989463	1.65289	0.623053	0.00713333	0.103333	1.5	18.0625	1.03623	0.00128402	0.1423	5.89019	7.22394
E3 mutant NTx40-4-3	3.01726	9.09964	20.5413	9.09964	4.39486	4.3427	0.0486825	0.0486825	1.00048	5.52557	0.846757	0.0255222	1.94167	1.5	80.6252	1.28934	0.00431785	1.00369	5.5774	6.85635
E3 mutant NTx40-4-4	1.91485	2.55753	0.628002	2.55753	1.39969	2.38542	1.59235	1.59235	1.10347	0.529976	0.346395	0.00708889	0.00666667	1	3.05882	1.09131	0.00147718	0.0395904	1.37892	2.04783
E3 mutant NTx40-4-5	2.79019	7.00635	11.9649	7.00635	3.36735	3.6391	0.083578	0.083578	0.953117	4.16667	0.806452	0.0168778	0.446667	1.08333	56.4645	1.19415	0.00301894	0.252701	9.34668	9.87034
E3 mutant NTx40-4-6	2.83809	7.40357	4.66217	7.40357	4.35359	3.42756	0.214492	0.214492	0.965979	1.83402	0.647145	0.0151778	0.66	0.545455	47.0769	1.19212	0.00267004	0.19132	2.2499	2.80725
E3 mutant NTx40-4-7	2.50524	5.04679	10.9178	5.04679	2.63428	3.04375	0.0915933	0.0915933	0.97887	3.04918	0.753036	0.00823333	0.765	0.333333	32.1792	1.0687	0.00139108	1.08044	22.181	22.7706
E3 mutant NTx40-4-8	2.73224	6.55416	2.37355	6.55416	3.15577	3.88235	0.421309	0.421309	1.05228	1.49356	0.598967	0.0129111	0.168333	3.8	31.0474	1.1712	0.00232997	0.149583	2.83028	2.84895
E3 mutant NTx40-4-9	2.71788	6.44667	8.03787	6.44667	2.80631	3.24286	0.124411	0.124411	0.842674	1.89251	0.654279	0.00986667	0.418333	2.5	39.2444	1.1069	0.00164683	0.73598	10.5646	19.6119
E3 mutant NTx40-5-1	2.25181	3.76965	2.53462	3.76965	1.90233	2.65152	0.394536	0.394536	0.970144	2.0354	0.670554	0.00762222	0.0866667	2	7.31304	1.06084	0.0014421	0.275321	2.573	2.74866
E3 mutant NTx40-5-10	2.50928	5.07032	3.50405	5.07032	2.57228	3.19018	0.285384	0.285384	1.00911	2.36145	0.702509	0.0093	0.111667	1	21.3333	1.08574	0.00169929	0.201547	3.53889	3.56028
E3 mutant NTx40-5-11	2.236	3.70166	1.22464	3.70166	1.93478	2.60156	0.816568	0.816568	0.977584	0.861272	0.462733	0.00715556	0.0166667	0.8	28.4027	1.06149	0.00133194	0.0881134	1.47788	2.93097
E3 mutant NTx40-5-12	2.62372	5.78433	3.14781	5.78433	3.21921	2.891	0.317681	0.317681	0.896744	1.58017	0.612429	0.00983333	0.14	2.66667	37.203	1.1084	0.00174039	0.20447	2.9565	4.58001
E3 mutant NTx40-5-13	2.39686	4.45474	4.40783	4.45474	2.90909	2.39429	0.226869	0.226869	0.91671	1.72868	0.633523	0.00782222	0.421667	3	27.13	1.08377	0.00133779	0.539623	1.17244	6.31956
E3 mutant NTx40-5-14	2.63888	5.88623	4.84138	5.88623	2.85332	3.25592	0.206553	0.206553	0.934356	3.12167	0.75738	0.0120444	0.25	1.22222	49.7004	1.14701	0.00209829	0.280024	3.31434	4.27326
E3 mutant NTx40-5-15	2.78422	6.95834	3.32419	6.95834	3.10651	4.07627	0.300825	0.300825	1.03251	3.56757	0.781065	0.0169	0.405	1.06667	56.0303	1.19647	0.00316049	0.46225	1.03564	1.03779
E3 mutant NTx40-5-16	2.79935	7.08058	16.4665	7.08058	5.08222	2.58763	0.0607293	0.0607293	0.823873	3.83871	0.793333	0.01	0.63	8.5	35.8543	1.1435	0.00154535	0.495536	1.14789	6.94146
E3 mutant NTx40-5-17	3.0276	9.20859	27.2764	9.20859	5.97493	3.44164	0.0366618	0.0366618	0.913564	6.81119	0.871979	0.0124111	1.84833	2.66667	64.6828	1.16289	0.00180185	1.00536	2.47235	4.11237
E3 mutant NTx40-5-18	2.61971	5.75771	17.4408	5.75771	5.80443	2.16774	0.0573368	0.0573368	0.907063	2.51948	0.715867	0.00301111	0.0466667	4.5	17.3402	0.89453	0.000340704	0.388962	6.93048	10.6886
E3 mutant NTx40-5-19	3.09226	9.92034	26.8348	9.92034	4.402	4.58586	0.0372651	0.0372651	0.969883	6.77202	0.871333	0.0166667	1.14167	2.41667	87.4093	1.20201	0.00255868	0.365148	13.3799	13.4749
E3 mutant NTx40-5-2	2.14374	3.32862	2.15803	3.32862	1.90964	2.23958	0.463386	0.463386	0.929776	1.22819	0.551205	0.00368889	0.04	0	4.28415	0.922031	0.000638417	0.109764	4.7454	5.19244
E3 mutant NTx40-5-20	2.71287	6.40956	7.66156	6.40956	3.09146	3.45798	0.130522	0.130522	0.948587	2.87021	0.741616	0.0145778	0.435	1.33333	43.6136	1.16037	0.00257492	0.32196	9.16175	10.8485
E3 mutant NTx40-5-21	2.70792	6.37316	3.80278	6.37316	2.99752	4.05696	0.262966	0.262966	1.10211	3.7076	0.787578	0.00894444	0.125	1	41.3943	1.0709	0.00149233	0.301137	1.18565	1.57726
E3 mutant NTx40-5-22	2.76559	6.81067	3.74926	6.81067	3.4502	3.80597	0.266719	0.266719	1.038	3.14876	0.758964	0.0111556	0.203333	1.11111	38.8241	1.11272	0.00193708	0.429259	1.27218	1.29844
E3 mutant NTx40-5-23	2.61912	5.75381	7.74112	5.75381	2.79075	3.36364	0.12918	0.12918	0.976593	3.85204	0.793901	0.0105667	0.266667	0.642857	42.4384	1.15418	0.00182854	0.226991	3.95378	7.24824
E3 mutant NTx40-5-24	2.25097	3.76599	0.972765	3.76599	1.65396	3.01449	1.028	1.028	1.02943	0.74955	0.428424	0.0107889	0.0266667	0.833333	19.0409	1.13185	0.00228728	0.163635	1.17395	3.25882
E3 mutant NTx40-5-25	2.34947	4.21821	1.20473	4.21821	2.1559	3.14173	0.830062	0.830062	1.09359	0.749386	0.428371	0.00791111	0.07	7	11.8033	1.05376	0.0015232	0.159	3.21513	3.27878
E3 mutant NTx40-5-3	2.86673	7.65178	6.248	7.65178	4.05547	3.75573	0.160051	0.160051	0.988444	4.46058	0.816869	0.0146222	0.491667	2.8	59.0735	1.17386	0.00237089	0.254145	1.62836	1.63232
E3 mutant NTx40-5-4	2.45961	4.78849	2.03623	4.78849	3.13142	2.6087	0.491103	0.491103	0.964041	1.35897	0.576087	0.0112444	0.115	1.2	32.6655	1.11872	0.00216351	0.0702902	1.79355	2.19109
E3 mutant NTx40-5-5	2.5867	5.54302	7.85269	5.54302	2.78797	3.21809	0.127345	0.127345	0.969384	4.04255	0.801688	0.0105333	0.353333	0.615385	41.2224	1.11148	0.00184072	0.197559	4.04616	7.40116
E3 mutant NTx40-5-6	2.54055	5.25619	5.25364	5.25619	3.82441	2.62687	0.190344	0.190344	0.977347	1.78819	0.641345	0.00892222	0.163333	3.5	19.4175	1.0856	0.00155088	0.176446	8.81407	10.7334
E3 mutant NTx40-5-7	2.53994	5.25251	9.68768	5.25251	2.43317	2.99355	0.103224	0.103224	0.889008	4.85849	0.829308	0.0069	0.156667	2	20.6	1.06574	0.00114798	0.403288	1.41737	7.06642
E3 mutant NTx40-5-8	1.75824	2.13558	0.65484	2.13558	1.28302	2.04545	1.52709	1.52709	1.0849	0.458716	0.314465	0.00353333	0.00333333	0	1.21	0.947953	0.000667049	0.112154	1.06199	2.64525
E3 mutant NTx40-5-9	1.72003	2.04367	0.379695	2.04367	1.08075	2.2807	2.6337	2.6337	1.16016	0.352941	0.26087	0.00357778	0	0	0.0119048	0.94211	0.000698354	0	1.03404	1.16467
E3 mutant NTx40-6-1	2.71675	6.4383	5.80998	6.4383	3.78903	3.01838	0.172118	0.172118	0.912572	3.09494	0.755796	0.0143778	0.473333	1	64.9325	1.16126	0.00251888	0.37811	1.77875	3.09632
E3 mutant NTx40-6-10	2.41948	4.57229	3.33422	4.57229	2.67535	2.54248	0.29992	0.29992	0.909525	2.09677	0.677083	0.0064	0.0216667	2	14.4231	1.04043	0.00109741	0.412479	1.0112	1.89896
E3 mutant NTx40-6-11	2.11785	3.23089	1.19335	3.23089	1.59145	2.52688	0.837979	0.837979	0.986642	0.904977	0.475059	0.00467778	0.00333333	0	5.78	1.01183	0.000861632	0.137849	1.59368	3.20964
E3 mutant NTx40-6-12	2.8294	7.32987	12.917	7.32987	4.58849	2.82958	0.0774175	0.0774175	0.826916	2.17729	0.685266	0.0127444	0.428333	1.33333	51.9135	1.15825	0.00210381	0.147635	15.0474	22.4017
E3 mutant NTx40-6-13	2.04481	2.97029	2.03132	2.97029	1.57439	2.13095	0.49229	0.49229	0.900184	0.965986	0.491349	0.00321111	0.0216667	0	2.54225	0.952339	0.000543827	0.316774	4.09107	7.82105
E3 mutant NTx40-6-2	2.79656	7.05792	10.2734	7.05792	4.17845	3.28125	0.0973388	0.0973388	0.95032	2.12681	0.680185	0.00958889	0.373333	1.28571	48.6559	1.10783	0.00154071	0.247818	11.0522	11.9097
E3 mutant NTx40-6-3	2.99044	8.82302	18.3438	8.82302	5.67153	3.45631	0.0545143	0.0545143	0.932923	5.85882	0.854202	0.0129556	0.983333	2.22222	78.1536	1.14942	0.00195486	0.505544	3.82611	4.58057
E3 mutant NTx40-6-4	2.76484	6.80482	10.8067	6.80482	4.15297	3.10277	0.0925349	0.0925349	0.929206	3.52564	0.779037	0.0117667	0.358333	1.6	41.0376	1.13736	0.00189938	0.316377	2.83252	4.86403
E3 mutant NTx40-6-5	2.04879	2.98394	1.93209	2.98394	2.03103	1.92593	0.517575	0.517575	0.919831	1.14286	0.533333	0.00966667	0.0616667	0	10.2608	1.08246	0.00195832	0.135613	4.45335	4.49267
E3 mutant NTx40-6-6	3.07945	9.77506	11.1117	9.77506	5.43143	4.18904	0.0899951	0.0899951	0.99874	5.42574	0.844376	0.0216333	2.11333	1.71429	76.2263	1.23822	0.00366409	0.628464	1.31674	1.5104
E3 mutant NTx40-6-7	2.64263	5.91169	2.76191	5.91169	3.51801	3.0119	0.362068	0.362068	0.955605	1.80288	0.643225	0.00647778	0.133333	4.5	28.8427	1.03773	0.00104338	0.0926085	1.93786	2.01124
E3 mutant NTx40-6-8	2.84631	7.47392	5.91261	7.47392	4.09048	3.90498	0.16913	0.16913	1.05671	2.98872	0.749293	0.0117889	0.315	1	61.9925	1.14588	0.00192299	0.32052	3.51884	3.84998
E3 mutant NTx40-6-9	2.39944	4.46801	8.14751	4.46801	3.28391	2.18605	0.122737	0.122737	0.886626	1.64167	0.621451	0.00352222	0.143333	2	13.203	0.943137	0.000508574	0.635441	12.2215	13.2813
E3 mutant NTx40-7-1	2.59207	5.57736	8.59116	5.57736	3.73835	2.72381	0.116399	0.116399	0.944253	2.65502	0.726404	0.0093	0.0816667	4	22.1316	1.07334	0.0015563	0.15458	5.72559	6.26466
E3 mutant NTx40-7-10	2.43253	4.6415	5.46801	4.6415	2.9904	2.6028	0.182882	0.182882	0.969724	2.4209	0.707679	0.0127333	0.125	1.125	31.1726	1.13796	0.0023657	0.121796	6.00497	8.59918
E3 mutant NTx40-7-11	3.04325	9.37609	17.961	9.37609	4.04389	4.62449	0.0556762	0.0556762	0.99184	7.73684	0.885542	0.0129111	0.695	2.26667	81.1672	1.17526	0.00186156	0.488244	3.50045	3.52331
E3 mutant NTx40-7-12	1.92198	2.57859	1.69517	2.57859	1.40426	2.11236	0.589912	0.589912	0.970752	1.01429	0.503546	0.0047	0.00666667	2	1.20188	1.01265	0.000887022	0.353971	3.83052	7.90051
E3 mutant NTx40-7-2	2.1577	3.38254	5.71233	3.38254	2.23338	1.88272	0.17506	0.17506	0.831809	1.50775	0.601236	0.00718889	0.035	0	10.2031	1.04947	0.00126006	0.712008	6.90155	18.9276
E3 mutant NTx40-7-3	2.57924	5.4956	7.76089	5.4956	4.85392	2.42512	0.128851	0.128851	0.97222	2.79429	0.736446	0.00737778	0.173333	3.33333	26.5767	1.05064	0.0011547	0.399548	2.84779	4.8288
E3 mutant NTx40-7-4	2.72866	6.52717	5.80297	6.52717	3.21388	3.46465	0.172326	0.172326	0.951588	3.48469	0.777019	0.00976667	0.54	1.61538	40.8331	1.12108	0.00158384	0.740507	1.76368	2.36119
E3 mutant NTx40-7-5	2.91826	8.11939	8.32934	8.11939	4.37112	3.3879	0.120058	0.120058	0.872375	3.61603	0.783364	0.0121556	0.476667	2.125	61.727	1.14761	0.00199927	0.303845	4.88629	5.3641
E3 mutant NTx40-7-6	2.47221	4.85849	3.1178	4.85849	2.66619	3.01987	0.320739	0.320739	1.01492	1.40893	0.584879	0.00778889	0.105	3.5	16.0024	1.05514	0.00134117	0.253365	4.53065	4.59407
E3 mutant NTx40-7-7	2.70004	6.31559	15.0245	6.31559	3.45909	2.92857	0.0665578	0.0665578	0.862428	4.37818	0.814064	0.0164333	0.546667	1.6	43.5556	1.19762	0.00296548	1.14677	1.21142	15.0825
E3 mutant NTx40-7-8	2.80429	7.12099	7.66128	7.12099	4.77064	3.55133	0.130527	0.130527	1.08928	4.90086	0.830533	0.0152111	0.36	6	48.5708	1.17852	0.00263586	0.328798	2.41837	3.01942
E3 mutant NTx40-7-9	2.72001	6.46248	7.88514	6.46248	4.75932	3.26512	0.126821	0.126821	1.10223	3.81538	0.792332	0.0104333	0.29	14	23.4194	1.11751	0.00169033	0.656742	1.88492	2.46194
E3 mutant NTx40-8-1	2.83251	7.35612	8.36406	7.35612	4.34814	3.52091	0.119559	0.119559	0.998064	4.32068	0.812054	0.0140111	0.395	4.2	37.1338	1.1619	0.00231287	0.377815	1.00332	1.92102
E3 mutant NTx40-8-2	2.60073	5.63324	5.47208	5.63324	3.49621	2.89076	0.182746	0.182746	0.959516	1.9675	0.663016	0.0131889	0.328333	1.77778	30.5273	1.15815	0.00240058	0.298832	3.52749	7.52772
E3 mutant NTx40-8-3	2.76728	6.82396	13.1615	6.82396	3.81745	3.35955	0.0759792	0.0759792	0.961905	4.97826	0.832727	0.0152778	0.51	1.3	44.214	1.16587	0.00271923	0.350584	1.46049	6.39953
E3 mutant NTx40-8-4	2.83206	7.3523	7.44158	7.3523	4.7483	3.30314	0.13438	0.13438	0.978976	3.08333	0.755102	0.0147	0.463333	2.25	41.6577	1.17296	0.00250892	0.200151	1.49908	3.12577
E3 mutant NTx40-8-5	2.90216	7.97031	10.5449	7.97031	4.08463	3.94553	0.0948329	0.0948329	1.00047	6.6213	0.868789	0.0143111	0.675	2.85714	40.1644	1.1584	0.00237049	0.512272	2.37287	2.45748
E3 mutant NTx40-8-6	2.85117	7.51592	3.72549	7.51592	3.20951	4.19626	0.268421	0.268421	1.00023	2.41141	0.706866	0.0126222	0.311667	1.5	45.9078	1.16419	0.00214053	0.390242	1.61685	1.72526
E3 mutant NTx40-8-7	2.74562	6.65591	14.3284	6.65591	3.995	2.81724	0.0697915	0.0697915	0.846008	3.22183	0.763136	0.0133222	0.606667	5.33333	30.1158	1.15633	0.00222932	0.514186	12.2997	12.9656
E3 mutant NTx40-8-8	2.53188	5.20395	3.06767	5.20395	2.82602	3.08019	0.32598	0.32598	0.995021	2.84356	0.739824	0.0139222	0.215	1.2	31.1758	1.16246	0.00272925	0.322104	1.10889	2.03451
E3 mutant NTx40-8-9	3.05523	9.50631	5.88527	9.50631	3.88756	5.04096	0.169916	0.169916	1.04554	4.42655	0.815721	0.0213444	0.643333	2.42857	82.7058	1.24384	0.00360796	0.183947	1.27601	1.73316
E3 mutant NTx40-9-1	2.53206	5.20504	18.2947	5.20504	3.75462	1.98438	0.0546606	0.0546606	0.738724	2.22553	0.689974	0.00842222	0.32	4	23.1358	1.09895	0.00137416	1.12656	3.56865	18.4219
E3 mutant NTx40-9-10	2.2144	3.61075	3.11597	3.61075	1.78053	2.59292	0.320928	0.320928	0.958225	2.13772	0.681298	0.00582222	0.0416667	0.666667	8.47339	1.01605	0.00106973	0.390732	2.00907	5.42316
E3 mutant NTx40-9-11	2.3914	4.42684	1.07856	4.42684	1.90798	3.24638	0.927159	0.927159	1.01296	0.745182	0.426994	0.00905556	0.0583333	2.5	15.3132	1.07573	0.0017708	0.178611	2.29072	2.30102
E3 mutant NTx40-9-2	2.20241	3.56121	1.19259	3.56121	1.60697	2.87037	0.838515	0.838515	1.02175	0.643052	0.391376	0.0067	0.0316667	0	5.49153	1.08427	0.00129892	0.293659	3.7178	3.73738
E3 mutant NTx40-9-3	2.39524	4.44647	7.46556	4.44647	2.60845	2.34637	0.133948	0.133948	0.852261	2.42995	0.708451	0.00788889	0.0733333	1.5	15.0477	1.04224	0.00136804	0.135314	2.28688	21.6763
E3 mutant NTx40-9-4	2.5442	5.27834	10.5557	5.27834	6.59054	1.87132	0.0947357	0.0947357	0.910149	2.04527	0.671622	0.00822222	0.366667	3.33333	29.4588	1.0652	0.00128118	0.519875	11.1995	11.3124
E3 mutant NTx40-9-5	2.69241	6.26035	14.4686	6.26035	3.51741	2.63	0.0691154	0.0691154	0.787895	1.78414	0.640823	0.0140444	1.19	8.5	20.2272	1.16645	0.00253284	1.0192	48.3574	52.7682
E3 mutant NTx40-9-6	2.24838	3.75478	2.26716	3.75478	2.26181	2.4	0.441081	0.441081	0.961291	0.968992	0.492126	0.00564444	0.07	2	14.884	1.01073	0.00100259	0.0992095	6.42617	6.43161
E3 mutant NTx40-9-7	2.29668	3.96948	7.89865	3.96948	2.06	2.4875	0.126604	0.126604	0.899422	3.7619	0.79	0.00888889	0.178333	1.5	18.7991	1.07324	0.00165736	0.459619	12.7455	16.047
E3 mutant NTx40-9-8	2.70774	6.37184	13.4544	6.37184	4.43079	2.46275	0.0743254	0.0743254	0.81357	3.06842	0.754204	0.00858889	0.431667	4.66667	42.8199	1.08785	0.00128788	0.209725	9.35663	10.7041
E3 mutant NTx40-9-9	1.4871	1.56295	0.382817	1.56295	1.07662	1.62338	2.61221	2.61221	1.07772	0.322078	0.243615	0.00565556	0	0	0.395161	1.03746	0.00119887	0	1.2715	1.28364
E4 WT NTx40-1-1	2.88186	7.78621	13.9625	7.78621	4.84698	3.0363	0.0716206	0.0716206	0.858529	4.2654	0.810081	0.0123444	0.405	3.33333	60.3211	1.19333	0.00188351	0.174937	1.32065	7.2681
E4 WT NTx40-1-10	1.85923	2.3989	1.11568	2.3989	1.35505	1.93506	0.896312	0.896312	0.93899	0.705556	0.413681	0.00341111	0.00666667	0	2.55118	0.952364	0.0006114	0.20578	2.14526	3.74246
E4 WT NTx40-1-11	2.2194	3.63159	3.73752	3.63159	2.17439	2.53704	0.267557	0.267557	1.03015	2.08163	0.675497	0.00503333	0.0816667	0.75	10.6176	1.03805	0.000866655	0.567711	3.37342	5.43174
E4 WT NTx40-1-2	2.58588	5.53779	7.98224	5.53779	2.89655	3.17257	0.125278	0.125278	0.975023	5.14747	0.837331	0.0148222	1.12833	0.333333	48.1862	1.15446	0.00286256	0.798236	3.04023	4.54559
E4 WT NTx40-1-3	2.86117	7.60295	7.75557	7.60295	5.23162	3.41923	0.12894	0.12894	1.02864	3.12121	0.757353	0.0120889	0.895	3	51.5	1.13407	0.00190624	0.750612	1.63229	1.68036
E4 WT NTx40-1-4	2.33222	4.13529	2.78141	4.13529	2.5489	2.3945	0.35953	0.35953	0.924451	1.05844	0.514196	0.00352222	0.035	2	10.3129	0.976016	0.000549767	0.168497	2.55217	6.04318
E4 WT NTx40-1-5	2.97231	8.64073	12.1271	8.64073	5.6124	3.40484	0.08246	0.08246	0.933515	3.77778	0.790698	0.0114667	0.613333	2.57143	67.1029	1.14357	0.00171124	0.537364	2.82039	5.29152
E4 WT NTx40-1-6	2.75616	6.73714	5.05081	6.73714	6.42655	2.48797	0.197988	0.197988	0.936179	2.06333	0.673558	0.0102111	0.363333	4.5	29.0081	1.08872	0.00175655	0.257636	3.92218	3.95551
E4 WT NTx40-1-7	2.10888	3.19769	1.50166	3.19769	1.50923	2.44915	0.66593	0.66593	0.94093	1.13816	0.532308	0.00722222	0.02	0	12.974	1.05243	0.00144428	0.0877058	5.4331	5.60321
E4 WT NTx40-1-8	2.13775	3.30574	1.59522	3.30574	2.0298	2	0.626874	0.626874	0.861961	1	0.5	0.00671111	0.0166667	1	18.1325	1.04875	0.00127871	0.0406894	1.97457	4.19678
E4 WT NTx40-1-9	2.52353	5.1542	12.1052	5.1542	2.32637	3.23645	0.0826091	0.0826091	0.95774	11.5534	0.92034	0.0143667	0.461667	0.692308	35.6605	1.16679	0.00273407	0.365783	1.17757	3.07304
E4 WT NTx40-2-1	2.97309	8.64851	21.7965	8.64851	7.34708	3.05278	0.0458789	0.0458789	0.956779	5.9837	0.856809	0.0142778	0.701667	2.08333	65.723	1.16753	0.00218121	0.318068	1.0112	4.75353
E4 WT NTx40-2-2	2.60258	5.6453	2.99032	5.6453	3.09644	3.20588	0.334413	0.334413	0.999291	1.68342	0.627341	0.0118667	0.0566667	1.5	22.5806	1.13013	0.002172	0.246701	2.398	2.76893
E4 WT NTx40-2-3	2.94422	8.36571	6.48984	8.36571	4.5951	3.65591	0.154087	0.154087	0.936786	3.92917	0.797126	0.0131444	0.766667	2.125	54.1633	1.16001	0.00206907	0.741249	1.0998	1.28827
E4 WT NTx40-2-4	2.63515	5.86098	5.51163	5.86098	3.21097	2.93122	0.181434	0.181434	0.896182	2.18834	0.686357	0.0079	0.123333	0.333333	28.5328	1.05968	0.00129443	0.262521	3.58649	4.44558
E4 WT NTx40-2-5	3.00371	8.95877	14.5903	8.95877	4.64792	3.72296	0.0685389	0.0685389	0.895919	5.16875	0.837893	0.0219333	1.68167	2.33333	88.6874	1.25858	0.00369102	0.715298	2.71692	9.17362
E4 WT NTx40-2-6	2.74623	6.66057	20.1885	6.66057	4.94599	2.88136	0.049533	0.049533	0.962082	7.30769	0.87963	0.0144	0.538333	3.2	55.264	1.16706	0.00233492	0.216951	3.45468	3.82788
E4 WT NTx40-2-7	2.23488	3.69687	2.55789	3.69687	1.68	2.37607	0.390947	0.390947	0.833067	0.965066	0.491111	0.005	0.065	2	8.76018	1.03558	0.000876692	0.434613	2.06996	9.71477
E4 WT NTx40-2-8	2.71798	6.44738	30.1516	6.44738	5.23803	2.51653	0.0331657	0.0331657	0.893311	3.46541	0.776056	0.00788889	0.441667	10	24.8439	1.06049	0.00115687	0.892062	17.008	17.0686
E4 WT NTx40-3-1	2.61768	5.74427	8.51572	5.74427	4.19308	2.84416	0.11743	0.11743	1.01388	4.00481	0.800192	0.0115667	0.488333	1.16667	38.4646	1.1073	0.00187457	0.887527	1.0366	2.27269
E4 WT NTx40-3-2	2.88522	7.81637	14.4168	7.81637	4.64274	3.22314	0.0693634	0.0693634	0.888507	4.40303	0.814919	0.0198111	1.39667	1.23529	91.1879	1.22503	0.00336271	0.502378	1.21117	11.9197
E4 WT NTx40-3-3	2.18634	3.49593	1.43385	3.49593	1.78968	2.82787	0.697425	0.697425	1.08214	1.14088	0.532903	0.00861111	0.0483333	0	8.42857	1.08823	0.00167964	0.375027	1.24576	2.18423
E4 WT NTx40-3-4	2.33492	4.14817	5.01027	4.14817	2.18112	2.5188	0.19959	0.19959	0.896761	1.44811	0.591522	0.00576667	0.301667	3.5	9.49837	0.991725	0.000967445	0.623867	21.882	22.3874
E4 WT NTx40-3-5	2.99124	8.83107	16.6722	8.83107	5.75554	3.49201	0.0599802	0.0599802	0.948649	5.55376	0.847416	0.0135444	1.25333	2.44444	57.6341	1.1609	0.00202466	0.861633	1.5479	2.30862
E4 WT NTx40-3-6	3.06802	9.64728	19.0239	9.64728	6.8868	3.77717	0.0525654	0.0525654	1.02747	9.01212	0.900121	0.0183556	1.17167	3.5	73.2347	1.21581	0.00270885	0.403526	1.20155	1.66241
E4 WT NTx40-4-1	2.92086	8.14373	21.2371	8.14373	9.00313	2.67665	0.0470873	0.0470873	0.986199	3.09829	0.755996	0.0106556	0.681667	8	50.8469	1.13061	0.00150409	0.548959	4.89567	6.68285
E4 WT NTx40-4-2	2.93929	8.31842	11.1006	8.31842	5.52029	3.26246	0.0900849	0.0900849	0.921478	2.97491	0.748422	0.0123222	0.826667	1.72727	76.5108	1.16482	0.00185333	0.242098	2.50216	6.69905
E4 WT NTx40-4-3	2.77349	6.87294	15.9618	6.87294	4.94054	3.10042	0.0626496	0.0626496	1.00269	4.96774	0.832432	0.0102778	0.693333	2	40.2286	1.11878	0.0016431	0.585408	11.461	12.0455
E4 WT NTx40-4-4	2.44289	4.6972	1.82186	4.6972	2.88853	3.07853	0.548889	0.548889	1.11389	1.30074	0.565357	0.0138556	0.0633333	1.14286	22.878	1.16968	0.00277466	0.0800962	2.4095	2.47251
E4 WT NTx40-4-5	2.75055	6.69378	6.79734	6.69378	4.37592	3.1055	0.147116	0.147116	0.9705	2.11877	0.679361	0.00904444	0.778333	4	39.0759	1.07119	0.00141235	0.709708	2.86996	4.25191
E4 WT NTx40-4-6	2.0731	3.06862	2.53273	3.06862	1.84763	2.2029	0.39483	0.39483	0.975796	0.918919	0.478873	0.00867778	0.065	0.4	12.3636	1.06529	0.00168709	0.182457	11.233	11.4737
E4 WT NTx40-5-1	2.96237	8.5424	22.9013	8.5424	7.67583	3.04942	0.0436656	0.0436656	0.989008	5.21762	0.839167	0.0133333	1.49833	2.85714	77.2999	1.15917	0.00187796	0.612372	1.30743	2.00158
E4 WT NTx40-5-2	2.84149	7.43255	11.0549	7.43255	4.70809	3.16604	0.0904577	0.0904577	0.924273	3.48673	0.77712	0.0112667	0.471667	2.5	45.8122	1.13908	0.00180588	0.0702208	2.00594	7.48797
E4 WT NTx40-5-3	2.94173	8.34183	9.75257	8.34183	3.81927	3.93985	0.102537	0.102537	0.923014	4.95261	0.832006	0.0139556	0.488333	1.72727	62.7139	1.15876	0.00232626	0.0798087	4.14556	4.45778
E4 WT NTx40-5-4	2.86739	7.65755	7.59547	7.65755	6.77427	2.72973	0.131657	0.131657	0.927815	3.19905	0.761851	0.00984444	0.395	2.6	55.1837	1.09349	0.00147087	0.237557	1.52053	1.74947
E4 WT NTx40-5-5	2.87428	7.71858	12.582	7.71858	5.60443	3.21687	0.0794785	0.0794785	0.986647	4.16265	0.806301	0.00952222	0.441667	16	37.9797	1.11058	0.00141132	0.615816	1.36171	2.72031
E4 WT NTx40-6-1	2.74618	6.66018	11.4529	6.66018	5.19462	2.85714	0.0873141	0.0873141	0.977739	3.00862	0.750538	0.0103333	0.425	3.33333	31.8066	1.09413	0.00164467	0.491869	1.18957	4.02787
E4 WT NTx40-6-2	2.59649	5.60584	2.94307	5.60584	2.47101	3.625	0.339781	0.339781	1.01649	2.45	0.710145	0.00766667	0.155	2.33333	23.3653	1.09115	0.00133676	0.240772	1.70382	2.93908
E4 WT NTx40-6-3	2.8408	7.42666	4.1403	7.42666	3.79124	3.75	0.241529	0.241529	0.98317	3.63208	0.784114	0.0109111	0.235	1.71429	50.4013	1.12906	0.00180873	0.115058	1.29343	1.40422
E4 WT NTx40-6-4	2.77615	6.89397	7.57158	6.89397	3.76766	3.78857	0.132073	0.132073	1.0667	2.79381	0.736413	0.00817778	0.173333	2.25	41.5129	1.0772	0.00126871	0.738131	1.45431	5.73545
E4 WT NTx40-6-5	2.7184	6.45054	8.72991	6.45054	5.60472	2.71681	0.114549	0.114549	0.997105	2.93989	0.746186	0.00801111	0.301667	2	39.0799	1.08171	0.0012293	0.485576	2.72703	2.78475
E4 WT NTx40-6-6	2.79112	7.01386	19.2638	7.01386	4.81793	3.43933	0.0519107	0.0519107	1.07633	9.61165	0.905764	0.0121444	0.808333	2.83333	50.2313	1.13855	0.00185955	0.623569	1.22097	1.45068
E4 WT NTx40-7-1	3.0735	9.70829	20.4787	9.70829	5.38998	4.26994	0.0488312	0.0488312	1.02111	10.1293	0.910147	0.0181778	1.40333	1.05556	84.1612	1.20861	0.00283919	0.602054	1.46806	1.73997
E4 WT NTx40-7-2	2.88987	7.85829	13.4441	7.85829	5.01967	3.27609	0.0743819	0.0743819	0.934041	5.13065	0.836885	0.0135556	0.555	2.5	44.0196	1.14982	0.00217647	0.589526	2.34184	2.9131
E4 WT NTx40-7-3	3.08503	9.83805	38.1498	9.83805	6.77558	3.5237	0.0262125	0.0262125	0.932315	8.32308	0.892739	0.0202	2.46333	1.38462	114.987	1.23845	0.00297657	0.956996	1.23593	6.00698
E4 WT NTx40-7-4	3.01786	9.10598	12.1986	9.10598	3.7267	4.47866	0.0819769	0.0819769	0.949475	7.15354	0.877354	0.0230111	0.823333	1.47368	92.5151	1.25707	0.00397472	0.376135	1.79817	4.16943
E4 WT NTx40-7-5	2.60336	5.65032	1.82784	5.65032	3.39891	2.77617	0.547092	0.547092	0.905824	1.35463	0.575305	0.0163778	0.201667	2.25	31.3314	1.18873	0.00327083	0.0781398	1.57914	1.58163
E4 WT NTx40-8-1	2.71875	6.45315	5.92824	6.45315	3.09403	3.43348	0.168684	0.168684	0.93589	1.72991	0.633688	0.0135889	0.325	1.36364	52.1303	1.16127	0.00230338	0.833674	2.0628	10.6306
E4 WT NTx40-8-2	2.8448	7.46098	13.6973	7.46098	5.02826	3.10638	0.0730069	0.0730069	0.933615	3.33597	0.769371	0.0121889	0.253333	2.75	29.205	1.14394	0.00192338	0.445784	7.33574	8.33979
E4 WT NTx40-8-3	2.80387	7.11755	5.19464	7.11755	4.31085	3.37657	0.192506	0.192506	0.984978	3.94203	0.797654	0.0113667	0.355	2.28571	48.5306	1.1147	0.00191616	0.25782	1.51425	1.86225
E4 WT NTx40-8-4	2.3938	4.43908	3.17474	4.43908	2.17493	2.75325	0.314986	0.314986	0.914693	2.21239	0.688705	0.00806667	0.0466667	2	12.482	1.05664	0.00144737	0.148454	3.53866	3.59711
E4 WT NTx40-8-5	2.50693	5.0566	4.65399	5.0566	2.88525	2.89655	0.21487	0.21487	0.973004	4.13084	0.8051	0.0061	0.108333	2	18.3258	1.04092	0.00098119	0.428918	1.33729	1.35773
E4 WT NTx40-8-6	2.47843	4.89342	3.11598	4.89342	2.35901	3.20423	0.320926	0.320926	1.00572	2.47475	0.712209	0.00764444	0.205	1	31.3796	1.08169	0.00128512	0.648119	1.91403	1.9245
E4 WT NTx40-8-7	2.59641	5.60531	3.78737	5.60531	5.22909	2.31841	0.264035	0.264035	0.945809	1.61905	0.618182	0.00611111	0.186667	3.33333	30.0029	1.02133	0.000950151	0.307482	1.40483	1.75244
E4 WT NTx40-9-1	2.84772	7.48611	9.82539	7.48611	4.56691	3.28049	0.101777	0.101777	0.936469	3.80702	0.791971	0.0182667	0.7	1.44444	67.2934	1.21022	0.00307881	0.232672	2.67476	3.32464
E4 WT NTx40-9-2	2.34028	4.17385	1.46968	4.17385	2.13208	2.7697	0.68042	0.68042	0.968939	0.995816	0.498952	0.0106	0.07	0.75	13.7836	1.10799	0.00215168	0.194257	1.41687	2.95647
E4 WT NTx40-9-3	2.23135	3.6819	4.85578	3.6819	2.13333	2.09884	0.20594	0.20594	0.8326	2.31169	0.698039	0.0085	0.165	1	17.985	1.09219	0.00155251	0.184355	3.15551	7.56802
E4 WT NTx40-9-4	2.16517	3.41178	5.05248	3.41178	2.17269	2.48276	0.197922	0.197922	1.07264	3.28019	0.766366	0.00984444	0.111667	0.25	13.8571	1.11635	0.00188747	0.309737	4.16673	4.93631
E4 WT NTx40-9-5	2.29613	3.967	10.6729	3.967	2.82647	1.82569	0.0936951	0.0936951	0.773725	2.51316	0.715356	0.0089	0.183333	2	13.8237	1.07029	0.00153453	0.145683	14.2569	20
E4 WT NTx40-9-6	2.64591	5.934	7.43117	5.934	3.61216	2.88561	0.134568	0.134568	0.924215	4.88085	0.829957	0.0153556	0.398333	1.83333	33.8352	1.1665	0.00279005	0.270338	1.15954	1.90762
E7 WT T0 controle du 031023 C1 - x40-2	2.68796	6.22838	7.18942	6.22838	3.22758	3.43478	0.139093	0.139093	0.990746	4.72928	0.825458	0.0115222	0.301667	0.875	33.3657	1.13479	0.00203181	0.175665	2.14519	3.44836
E7 WT T0 controle du 031023 C1 - x40-3	2.95475	8.4678	8.88235	8.4678	5.48478	3.90393	0.112583	0.112583	1.07972	5.03401	0.834273	0.00985556	0.59	2.8	66.6	1.11212	0.00136732	0.546589	1.0524	1.41529
E7 WT T0 controle du 031023 C1 - x40-4	2.42879	4.62156	5.85537	4.62156	2.33154	2.88806	0.170783	0.170783	0.954199	2.875	0.741935	0.0062	0.191667	1.75	18.2826	1.04359	0.00101935	0.538816	7.31786	8.00562
E7 WT T0 controle du 031023 C1 - x40-5	3.03428	9.27973	22.3363	9.27973	3.77541	5.29493	0.0447702	0.0447702	1.10868	12.8636	0.927869	0.0135556	0.636667	1.05	78.4488	1.19364	0.00202186	0.466061	2.69537	3.1049
E7 WT T0 controle du 031023 C1 - x40-6	2.83187	7.35073	4.59941	7.35073	2.73773	4.82353	0.217419	0.217419	1.08575	4.57031	0.820477	0.0158444	0.405	0.863636	69.4231	1.20103	0.00288224	0.301934	1.55561	2.01022
E7 WT T0 controle du 031023 C1 - x40-7	3.10571	10.0751	13.6273	10.0751	4.09853	5.28839	0.0733819	0.0733819	1.06264	9.01923	0.900192	0.0173667	0.571667	2.14286	77.3987	1.22842	0.00278469	0.128975	1.14281	2.12108
E7 WT T0 controle du 031023 C1 - x40-8	2.92142	8.14904	4.57924	8.14904	2.84918	5.4837	0.218377	0.218377	1.13587	4.57078	0.820492	0.0135556	0.253333	1.2	72.8272	1.15715	0.00228214	0.118044	1.8812	2.10546
E7 WT T0 controle du 031023 C1 - x40-9	2.21278	3.604	3.27486	3.604	1.83841	2.42202	0.305357	0.305357	0.911199	2.23485	0.690867	0.00474444	0.0166667	2	6.2678	0.982901	0.000825101	0.153033	3.75132	7.18053
E7 WT T0 controle du 031023 C10 - x40-1	2.68479	6.20571	3.98897	6.20571	2.54798	3.45989	0.250691	0.250691	0.889957	2.11151	0.678613	0.00961111	0.166667	0.833333	44.7087	1.09684	0.00168881	0.102003	3.17559	5.23655
E7 WT T0 controle du 031023 C10 - x40-10	2.55964	5.37299	4.77785	5.37299	2.20802	3.60331	0.209299	0.209299	0.996521	3.47863	0.776718	0.00582222	0.24	1.75	19.9017	1.02295	0.000948815	0.218426	1.34372	4.91981
E7 WT T0 controle du 031023 C10 - x40-11	2.2866	3.92368	1.22505	3.92368	1.9814	2.94231	0.81629	0.81629	1.05556	1.30476	0.566116	0.00537778	0.0133333	0.833333	18.9197	1.00023	0.000958099	0.25713	1.36658	1.65283
E7 WT T0 controle du 031023 C10 - x40-12	2.42527	4.6029	2.27359	4.6029	2.19077	3.328	0.439832	0.439832	1.07016	2.02326	0.669231	0.00722222	0.101667	0.8	15.4575	1.07182	0.00129688	0.313786	1.21091	2.36503
E7 WT T0 controle du 031023 C10 - x40-13	2.64618	5.93591	3.70308	5.93591	2.69673	3.70701	0.270046	0.270046	1.02555	3.15761	0.759477	0.0085	0.211667	1.55556	33.7349	1.10771	0.001459	0.219923	2.3432	2.48754
E7 WT T0 controle du 031023 C10 - x40-14	2.59163	5.57456	8.45988	5.57456	2.68305	3.55556	0.118205	0.118205	1.04475	6.76316	0.871186	0.00655556	0.148333	2	29.9144	1.02702	0.00106738	0.388391	2.95308	2.96095
E7 WT T0 controle du 031023 C10 - x40-15	2.8262	7.30289	15.7528	7.30289	3.16167	3.50612	0.0634808	0.0634808	0.853672	4.47761	0.817439	0.0122333	0.856667	1.1	49.9378	1.13963	0.00207617	0.549957	7.77171	14.1713
E7 WT T0 controle du 031023 C10 - x40-16	2.81083	7.17483	2.47593	7.17483	2.2809	5.14141	0.403888	0.403888	1.08224	2.24949	0.69226	0.0178	0.243333	0.666667	66.2227	1.21473	0.00353935	0.190275	1.00645	2.53455
E7 WT T0 controle du 031023 C10 - x40-2	2.6057	5.66561	2.24478	5.66561	2.21021	3.79793	0.445479	0.445479	0.99659	1.79245	0.641892	0.0148	0.133333	0.833333	43.5661	1.19622	0.00299655	0.0547997	3.61218	3.61327
E7 WT T0 controle du 031023 C10 - x40-3	2.64215	5.90841	4.0302	5.90841	2.76877	3.48421	0.248126	0.248126	0.981245	3.17992	0.760761	0.0111	0.193333	0.9	36.2579	1.13134	0.00195361	0.0707461	2.3832	2.80222
E7 WT T0 controle du 031023 C10 - x40-4	2.80752	7.14748	1.91126	7.14748	2.61132	4.42512	0.523214	0.523214	1.00047	2.1878	0.686305	0.0145222	0.175	1.07143	65.2887	1.18438	0.00274061	0.0997319	1.12192	1.41851
E7 WT T0 controle du 031023 C10 - x40-5	2.53327	5.2123	1.83622	5.2123	2.10495	3.61905	0.544598	0.544598	1.00736	2.21318	0.688782	0.00921111	0.0616667	0.636364	34.3257	1.09105	0.00170062	0.177096	1.5259	1.66711
E7 WT T0 controle du 031023 C10 - x40-6	2.66818	6.08816	15.4249	6.08816	4.08638	2.93074	0.0648301	0.0648301	0.973106	8.19626	0.89126	0.0109333	0.323333	0.9	46.9886	1.1251	0.00178695	0.0450835	1.19893	3.57741
E7 WT T0 controle du 031023 C10 - x40-7	2.49135	4.9667	5.84067	4.9667	2.10568	2.99248	0.171213	0.171213	0.874298	2.65	0.726027	0.00567778	0.133333	1.75	16.8221	1.01944	0.000936315	0.377964	8.1576	11.9711
E7 WT T0 controle du 031023 C10 - x40-8	2.42632	4.60847	2.1755	4.60847	2.23529	3.07018	0.459665	0.459665	0.996033	2.30216	0.697168	0.0051	0.195	1	16.6531	1.04721	0.000874741	0.355474	1.27658	1.32775
E7 WT T0 controle du 031023 C10 - x40-9	2.68462	6.2045	5.33489	6.2045	3.49206	3.34682	0.187445	0.187445	1.00801	3.55921	0.780664	0.0077	0.323333	0.833333	33.1904	1.06245	0.00121386	0.65023	1.71493	2.5611
E7 WT T0 controle du 031023 C2 - x40-2	2.72613	6.50816	5.51063	6.50816	2.81651	3.78205	0.181467	0.181467	0.975271	4.10938	0.804281	0.00726667	0.348333	1.22222	33.6293	1.08084	0.00112351	0.47571	1.14585	2.37111
E7 WT T0 controle du 031023 C2 - x40-3	2.84288	7.44445	5.19751	7.44445	3.34106	4.42188	0.1924	0.1924	1.08572	5.23494	0.839614	0.0115	0.625	1.25	46.4914	1.16045	0.00188474	0.792477	1.12488	1.13332
E7 WT T0 controle du 031023 C2 - x40-4	2.80962	7.16483	4.73801	7.16483	3.9291	3.44444	0.211059	0.211059	0.952928	4.19617	0.807551	0.0120667	0.513333	1.14286	50.7651	1.1269	0.00200188	0.279766	1.11559	1.19622
E7 WT T0 controle du 031023 C2 - x40-5	2.90894	8.03281	9.19687	8.03281	3.16033	4.23361	0.108733	0.108733	0.936935	5.35749	0.842705	0.0146222	0.581667	1	58.6339	1.18489	0.00251117	0.298171	2.94132	5.86316
E7 WT T0 controle du 031023 C2 - x40-6	2.52884	5.18582	5.32915	5.18582	3.13408	2.84	0.187647	0.187647	0.969518	2.31481	0.698324	0.00596667	0.105	2.5	24.0667	1.00762	0.000964529	0.172613	3.84022	4.6024
E7 WT T0 controle du 031023 C3 - x40-10	2.64474	5.92605	8.96288	5.92605	2.86855	3.32258	0.111571	0.111571	0.949603	4.27193	0.810316	0.00667778	0.236667	1.57143	30.0637	1.05882	0.00102902	0.310654	2.98977	7.00959
E7 WT T0 controle du 031023 C3 - x40-11	2.63367	5.85103	6.08948	5.85103	3.70648	2.86335	0.164218	0.164218	0.942157	2.12658	0.680162	0.00548889	0.115	3.33333	17.1905	1.0293	0.000827586	0.371015	2.09219	4.91757
E7 WT T0 controle du 031023 C3 - x40-12	2.4957	4.99167	9.71954	4.99167	3.56298	2.29605	0.102886	0.102886	0.868246	2.66981	0.727506	0.00432222	0.0833333	1.5	16.8233	0.97364	0.000645145	0.627149	3.60629	8.53251
E7 WT T0 controle du 031023 C3 - x40-2	2.96124	8.53126	13.1144	8.53126	5.69789	3.36749	0.0762523	0.0762523	0.942215	3.98995	0.799597	0.0110333	1.16667	1.05	75.5982	1.1272	0.00161761	0.130843	1.67074	4.26892
E7 WT T0 controle du 031023 C3 - x40-3	2.6067	5.67212	7.95746	5.67212	3.24362	2.73301	0.125668	0.125668	0.867783	2.08661	0.67602	0.00871111	0.185	1.5	36.9811	1.0582	0.00142849	0.202031	9.70243	14.1388
E7 WT T0 controle du 031023 C3 - x40-4	2.76775	6.82763	8.35076	6.82763	3.27485	3.61905	0.11975	0.11975	0.959223	4.08247	0.803245	0.0109556	0.453333	1	40.4558	1.11633	0.00175481	0.700623	2.29872	3.59869
E7 WT T0 controle du 031023 C3 - x40-5	2.95982	8.51733	10.254	8.51733	5.22099	3.68519	0.0975229	0.0975229	0.988628	5.9172	0.855433	0.0120667	0.371667	2.07692	59.9526	1.15352	0.00179601	0.244648	1.36813	1.40563
E7 WT T0 controle du 031023 C3 - x40-6	2.96602	8.5784	22.6743	8.5784	6.24052	3.10112	0.0441029	0.0441029	0.903073	7.28931	0.879363	0.0146444	1.085	3.88889	61.0492	1.17209	0.00216264	0.615924	2.30841	3.90844
E7 WT T0 controle du 031023 C3 - x40-7	2.59481	5.595	3.4874	5.595	2.68781	3.51124	0.286746	0.286746	1.02887	1.78151	0.640483	0.0110333	0.251667	3.75	37.2893	1.11738	0.00190721	0.343256	3.98418	4.37695
E7 WT T0 controle du 031023 C3 - x40-8	2.71412	6.41879	11.287	6.41879	3.00222	3.59474	0.0885973	0.0885973	0.970365	4.92763	0.831299	0.0100111	0.495	1	36.3485	1.11596	0.00169119	0.417434	11.9509	11.9517
E7 WT T0 controle du 031023 C3 - x40-9	2.72212	6.47819	4.80507	6.47819	3.07843	4	0.208114	0.208114	1.08336	3.3871	0.772059	0.00906667	0.145	2.75	27.6571	1.11835	0.00152891	0.273413	2.39626	2.39827
E7 WT T0 controle du 031023 C4 - x40-1	2.75904	6.75953	11.1324	6.75953	3.33102	3.34979	0.0898281	0.0898281	0.904462	4.88776	0.830156	0.0128222	0.788333	1.21429	56.1837	1.14056	0.00222075	0.541197	5.14848	5.54381
E7 WT T0 controle du 031023 C4 - x40-2	3.13245	10.3901	11.9923	10.3901	3.78272	5.74216	0.0833872	0.0833872	1.07487	7.62931	0.884116	0.0222444	0.678333	0.945946	129.628	1.27664	0.00361973	0.368598	1.21141	2.18954
E7 WT T0 controle du 031023 C4 - x40-3	2.94111	8.33589	9.61723	8.33589	4.34263	3.9322	0.10398	0.10398	0.983017	5.81858	0.853342	0.0171222	0.808333	1.57895	77.3848	1.20508	0.00280719	0.459241	1.64515	2.12375
E7 WT T0 controle du 031023 C4 - x40-4	2.55505	5.34468	4.1579	5.34468	2.72977	3.34043	0.240506	0.240506	1.03263	2.32258	0.699029	0.00686667	0.153333	1.5	25.5208	1.03035	0.00115021	0.292849	4.33697	5.07397
E7 WT T0 controle du 031023 C4 - x40-5	2.72863	6.52691	3.01052	6.52691	2.67215	4.73885	0.332169	0.332169	1.18685	3.30833	0.767892	0.0114889	0.145	1.4	49.8753	1.14341	0.00198714	0.21769	1.03567	1.4909
E7 WT T0 controle du 031023 C4 - x40-6	2.9286	8.21667	24.4369	8.21667	3.93	3.59075	0.0409217	0.0409217	0.866334	7.05369	0.875833	0.0133333	0.991667	0.92	81.1265	1.174	0.00208209	1.01201	4.10748	11.0527
E7 WT T0 controle du 031023 C4 - x40-7	3.07482	9.72307	12.6971	9.72307	3.42997	5.55814	0.0787583	0.0787583	1.0587	10.7214	0.914686	0.0261778	2.20333	0.836735	157.721	1.29401	0.00428725	0.904619	1.36932	1.75803
E7 WT T0 controle du 031023 C5 - x40-10	2.79403	7.03738	15.0596	7.03738	2.93386	3.57658	0.0664026	0.0664026	0.870515	6.1844	0.860809	0.0112556	0.618333	1.09091	44.5057	1.1173	0.00189571	0.749465	13.5073	13.5492
E7 WT T0 controle du 031023 C5 - x40-11	2.74273	6.6338	18.8822	6.6338	3.97049	3.03478	0.0529598	0.0529598	0.911564	3.84066	0.793417	0.00978889	0.873333	1.625	38.4778	1.11033	0.00154164	0.832103	15.5952	16.9556
E7 WT T0 controle du 031023 C5 - x40-12	2.98445	8.76231	11.1595	8.76231	5.22108	3.9572	0.0896099	0.0896099	1.03193	6.05263	0.858209	0.0119111	0.566667	1	58.5043	1.13531	0.00175272	0.508326	1.44749	1.84549
E7 WT T0 controle du 031023 C5 - x40-2	2.85612	7.55881	8.16979	7.55881	4.62662	3.58065	0.122402	0.122402	1.01892	5.12335	0.836691	0.0154444	0.708333	1.2	84.7773	1.19657	0.00248249	0.107288	1.75644	2.11362
E7 WT T0 controle du 031023 C5 - x40-3	2.88224	7.78962	10.8517	7.78962	4.20798	3.82063	0.0921515	0.0921515	1.00613	5.14194	0.837185	0.0105778	0.465	1	61.2811	1.13032	0.00162025	0.133631	1.25518	2.6869
E7 WT T0 controle du 031023 C5 - x40-4	2.6493	5.95722	11.4	5.95722	3.74007	2.48325	0.0877191	0.0877191	0.806152	2.12953	0.680464	0.00671111	0.446667	3.75	28.9075	1.03305	0.00101067	0.219119	4.39215	19.5479
E7 WT T0 controle du 031023 C5 - x40-5	2.65103	5.96911	4.03935	5.96911	4.37482	2.88021	0.247564	0.247564	1.00924	1.732	0.633968	0.00758889	0.225	22	28.97	1.07591	0.00118176	0.0765279	4.06301	4.07076
E7 WT T0 controle du 031023 C5 - x40-6	2.8879	7.84051	10.6166	7.84051	4.5955	3.77959	0.0941924	0.0941924	1.0334	5.64671	0.84955	0.0123333	0.566667	1.5	42.8431	1.13636	0.00193659	0.764057	1.76002	1.78447
E7 WT T0 controle du 031023 C5 - x40-7	2.94892	8.41114	10.8689	8.41114	3.69779	4.54589	0.0920059	0.0920059	1.03929	6.16547	0.860442	0.0110667	0.485	1.6875	56.9907	1.13135	0.00171323	0.519693	4.96048	4.96849
E7 WT T0 controle du 031023 C5 - x40-8	2.96284	8.54706	15.1331	8.54706	5.45197	3.58203	0.0660805	0.0660805	0.978564	4.98693	0.832969	0.0101778	0.463333	2.83333	42.464	1.11641	0.00145685	0.512933	2.56847	2.87034
E7 WT T0 controle du 031023 C5 - x40-9	2.62074	5.76452	2.21814	5.76452	3.61518	3.43558	0.450827	0.450827	1.13319	1.85551	0.6498	0.00834444	0.0783333	2	32.5328	1.07818	0.00144871	0.186066	1.07841	1.21465
E7 WT T0 controle du 031023 C6 - x40-1	2.81772	7.23196	2.98934	7.23196	2.48687	4.82474	0.334522	0.334522	1.05207	3.93704	0.797449	0.0148111	0.336667	1.41176	65.5654	1.19857	0.00258667	0.0987544	1.21452	1.27053
E7 WT T0 controle du 031023 C6 - x40-10	2.47869	4.89488	10.4675	4.89488	2.47	2.83212	0.0955337	0.0955337	0.909322	3.5045	0.778	0.00555556	0.2	1.28571	19.0129	1.02111	0.000886058	0.240832	21.3045	24.7378
E7 WT T0 controle du 031023 C6 - x40-3	2.85106	7.51495	4.75657	7.51495	2.64505	4.72539	0.210235	0.210235	1.02265	3.15603	0.759386	0.0130222	0.468333	1.26667	58.9225	1.15073	0.00224007	0.300739	3.9068	3.95553
E7 WT T0 controle du 031023 C6 - x40-4	2.68723	6.22318	11.4125	6.22318	3.66897	3.01523	0.0876229	0.0876229	0.928067	3.61783	0.783448	0.00805556	0.425	1.125	40.1426	1.09051	0.00125637	0.58722	2.99697	7.70774
E7 WT T0 controle du 031023 C6 - x40-5	2.96575	8.57574	3.01298	8.57574	2.51196	5.67347	0.331898	0.331898	1.04854	3.9011	0.795964	0.0148667	0.223333	1.38889	61.0563	1.17812	0.00259751	0.122261	1.26312	1.32947
E7 WT T0 controle du 031023 C6 - x40-6	2.5721	5.45059	2.41492	5.45059	2.93333	3.35329	0.414092	0.414092	1.05368	1.91667	0.657143	0.00933333	0.135	1.625	30.6159	1.09363	0.00167819	0.325503	1.75196	1.75716
E7 WT T0 controle du 031023 C6 - x40-7	2.79904	7.07811	15.8388	7.07811	5.31643	2.61594	0.0631361	0.0631361	0.852159	4.20755	0.807971	0.0092	0.678333	2.55556	57.423	1.08491	0.00135177	0.771629	2.0349	7.52419
E7 WT T0 controle du 031023 C6 - x40-8	3.01138	9.03822	12.3179	9.03822	4.92812	4.28571	0.081183	0.081183	1.05264	7.22078	0.878357	0.0140667	0.716667	2.17647	76.6763	1.1845	0.0021356	0.276802	2.05764	2.05776
E7 WT T0 controle du 031023 C6 - x40-9	2.98415	8.75935	9.85143	8.75935	4.27374	4.15745	0.101508	0.101508	0.981202	3.82927	0.792929	0.011	0.421667	2.7	57.7949	1.14263	0.00160958	0.384024	2.95556	5.46186
E7 WT T0 controle du 031023 C7 - x40-1	2.91338	8.07397	18.2016	8.07397	4.54528	3.32258	0.0549401	0.0549401	0.877342	6.04027	0.85796	0.0116556	0.751667	1.41667	70.0011	1.15184	0.00177541	0.419951	1.09683	9.24605
E7 WT T0 controle du 031023 C7 - x40-2	2.83473	7.37497	16.7022	7.37497	3.36425	3.79283	0.0598723	0.0598723	0.943295	7.03636	0.875566	0.0147333	0.96	1	80.6512	1.18791	0.00246069	0.329541	2.87924	10.2421
E7 WT T0 controle du 031023 C7 - x40-3	2.89848	7.93662	4.53237	7.93662	3.90674	3.95669	0.220635	0.220635	0.98538	3.2392	0.764107	0.0141778	0.38	1.1875	72.0256	1.17915	0.00245533	0.170285	1.87962	2.638
E7 WT T0 controle du 031023 C7 - x40-4	3.1566	10.6831	16.7173	10.6831	4.22933	5.01684	0.0598181	0.0598181	0.965761	8.26946	0.892119	0.0172	1.14833	1.32	116.438	1.21834	0.0025876	0.511496	1.13804	3.82411
E7 WT T0 controle du 031023 C7 - x40-5	2.74752	6.67049	5.44781	6.67049	3.02037	3.66832	0.18356	0.18356	0.955739	5.02454	0.834012	0.0109111	0.231667	1.27273	40.0012	1.13261	0.00187632	0.270776	1.55505	1.78327
E7 WT T0 controle du 031023 C7 - x40-6	3.03286	9.2646	14.296	9.2646	3.77093	4.27273	0.0699496	0.0699496	0.895576	4.972	0.832552	0.0165889	0.826667	1.28571	87.6106	1.21643	0.00271932	0.103521	8.0521	12.7255
E7 WT T0 controle du 031023 C7 - x40-7	3.15406	10.6518	12.0356	10.6518	3.67703	5.49466	0.0830871	0.0830871	0.989158	10	0.909091	0.0185778	0.895	0.875	113.306	1.23678	0.00297284	0.504169	1.04973	1.36228
E7 WT T0 controle du 031023 C8 - x40-10	2.42467	4.59969	4.01415	4.59969	2.40699	2.84967	0.249118	0.249118	0.961178	2.86486	0.741259	0.00794444	0.208333	0.7	31.3981	1.08479	0.00138965	0.354787	2.57594	4.31819
E7 WT T0 controle du 031023 C8 - x40-11	2.92491	8.18179	9.74879	8.18179	3.57379	4.04219	0.102577	0.102577	0.933971	4.42786	0.815765	0.0121222	0.405	1.41667	60.9989	1.14121	0.00187499	0.258672	2.70622	4.89013
E7 WT T0 controle du 031023 C8 - x40-12	2.71857	6.45178	6.52719	6.45178	3.12591	3.49261	0.153205	0.153205	0.957103	3.08936	0.755463	0.0106778	0.285	1.42857	35.2617	1.10388	0.00184835	0.260073	3.37039	3.5533
E7 WT T0 controle du 031023 C8 - x40-13	2.37783	4.35823	1.28327	4.35823	1.90499	3.40708	0.779258	0.779258	1.07899	1.67672	0.626409	0.0069	0.0666667	0.363636	19.4576	1.1004	0.00127527	0.313415	1.07444	1.16584
E7 WT T0 controle du 031023 C8 - x40-14	2.72596	6.50692	3.37329	6.50692	2.70715	3.75556	0.296446	0.296446	0.949632	2.64674	0.725782	0.0149111	0.481667	1.85714	36.2875	1.17793	0.00284834	0.147002	1.78944	2.50422
E7 WT T0 controle du 031023 C8 - x40-15	2.63227	5.84159	3.11821	5.84159	2.94168	3.37838	0.320697	0.320697	0.991917	2.11765	0.679245	0.00647778	0.151667	2.5	23.7601	1.05534	0.00103516	0.301511	1.05143	2.06741
E7 WT T0 controle du 031023 C8 - x40-16	2.77117	6.85454	4.4189	6.85454	2.92418	4.09497	0.226301	0.226301	1.02158	2.27338	0.694505	0.0101111	0.488333	1	45.1915	1.11391	0.00173691	0.432219	4.63581	4.78841
E7 WT T0 controle du 031023 C8 - x40-17	2.43418	4.65035	3.85448	4.65035	3.01338	2.67376	0.259439	0.259439	0.998077	2.20859	0.688337	0.00581111	0.116667	1.6	20.0694	1.00261	0.000930742	0.195553	1.52262	2.04056
E7 WT T0 controle du 031023 C8 - x40-2	2.59528	5.59802	6.05314	5.59802	2.60436	3.53012	0.165203	0.165203	1.01767	2.85841	0.740826	0.00968889	0.42	2	29.4799	1.10307	0.0016843	0.665327	5.51376	6.25788
E7 WT T0 controle du 031023 C8 - x40-3	2.4603	4.79233	1.36351	4.79233	1.75618	3.92857	0.733399	0.733399	1.08636	1.62848	0.619552	0.00943333	0.095	0.833333	18.2586	1.10953	0.00187012	0.1716	1.92894	1.95424
E7 WT T0 controle du 031023 C8 - x40-4	2.33625	4.15452	5.73704	4.15452	1.94882	2.65772	0.174306	0.174306	0.893047	2.52683	0.716459	0.00803333	0.258333	0.571429	18.9208	1.03098	0.00145142	0.382899	17.0515	17.1077
E7 WT T0 controle du 031023 C8 - x40-5	2.49172	4.96882	3.28104	4.96882	4.70787	2.20657	0.304782	0.304782	0.963557	2.42308	0.707865	0.00791111	0.225	1.25	35.0972	1.05271	0.00130074	0.322386	1.2532	1.40827
E7 WT T0 controle du 031023 C8 - x40-6	2.85496	7.54877	8.07884	7.54877	3.56337	3.83178	0.12378	0.12378	0.958196	4.27528	0.810437	0.0104333	0.348333	2.8	41.1682	1.12686	0.00163115	0.323058	3.06524	3.08628
E7 WT T0 controle du 031023 C8 - x40-7	2.59311	5.58403	3.22463	5.58403	2.56848	3.51538	0.310113	0.310113	1.00894	3.16406	0.75985	0.00592222	0.0833333	2.25	20	1.08725	0.000937755	0.435308	1.16577	1.51957
E7 WT T0 controle du 031023 C8 - x40-8	2.81811	7.23517	5.57767	7.23517	3.09979	4.07812	0.179286	0.179286	0.992379	3.21719	0.762876	0.0103556	0.113333	2	43.5668	1.12434	0.00173991	0.118104	2.96631	3.62109
E7 WT T0 controle du 031023 C8 - x40-9	2.68373	6.19812	3.89192	6.19812	2.72414	3.80435	0.256943	0.256943	1.01306	2.8447	0.739901	0.0112778	0.316667	0.615385	50.6325	1.13599	0.00204743	0.289385	2.52566	3.11219
E7 WT T0 controle du 031023 C9 - x40-10	2.469	4.84057	5.55472	4.84057	2.7789	2.95349	0.180027	0.180027	1.01713	2.42361	0.707911	0.00547778	0.175	3.5	16.9885	1.00895	0.000890029	0.72201	1.3732	6.4102
E7 WT T0 controle du 031023 C9 - x40-11	2.76072	6.77261	10.9457	6.77261	2.73511	3.723	0.0913597	0.0913597	0.909127	4.8973	0.830431	0.0121222	0.763333	0.866667	56.3753	1.14577	0.00213683	0.594814	4.31259	11.9728
E7 WT T0 controle du 031023 C9 - x40-12	2.86406	7.62829	3.14287	7.62829	2.67794	5.09626	0.318181	0.318181	1.09326	3.90909	0.796296	0.0138	0.208333	0.583333	76.4661	1.18503	0.00241436	0.228768	1.27882	1.36695
E7 WT T0 controle du 031023 C9 - x40-13	2.71881	6.45359	6.49587	6.45359	2.92081	3.86022	0.153944	0.153944	1.02226	3.56019	0.780711	0.0109444	0.338333	1.22222	51.4967	1.11142	0.00181102	0.542601	5.07766	5.12457
E7 WT T0 controle du 031023 C9 - x40-14	2.84441	7.45764	14.5707	7.45764	3.67	3.17871	0.068631	0.068631	0.816549	2.55872	0.719	0.0111111	0.998333	1.35714	48.6356	1.13233	0.00179881	0.851469	17.6614	25.1907
E7 WT T0 controle du 031023 C9 - x40-15	2.53547	5.22555	2.71234	5.22555	2.05215	3.72441	0.368685	0.368685	1.02101	2.54348	0.717791	0.00724444	0.065	0.833333	20.1047	1.06918	0.00129498	0.238219	1.11764	2.65038
E7 WT T0 controle du 031023 C9 - x40-16	2.79885	7.07651	4.34385	7.07651	3.30959	4.0289	0.230211	0.230211	1.03575	2.93878	0.746114	0.00857778	0.183333	0.9	47.2656	1.08255	0.00140541	0.339536	2.32106	2.3322
E7 WT T0 controle du 031023 C9 - x40-17	2.81363	7.19799	42.7852	7.19799	3.5774	3.45	0.0233726	0.0233726	0.906549	7.84874	0.88699	0.0117	1.51667	1.08333	49.4914	1.13159	0.00188529	1.28583	23.3321	23.9475
E7 WT T0 controle du 031023 C9 - x40-18	2.75844	6.7548	3.59043	6.7548	3.61481	3.57672	0.278518	0.278518	1.00673	2.33473	0.700125	0.00885556	0.158333	1.8	42.5018	1.07969	0.00138125	0.334169	1.48509	1.50004
E7 WT T0 controle du 031023 C9 - x40-19	2.77488	6.8839	2.57734	6.8839	2.66387	3.79044	0.387997	0.387997	0.898693	1.78906	0.641457	0.0198333	0.148333	1.13333	63.1974	1.23759	0.00394432	0.118345	1.28639	4.14948
E7 WT T0 controle du 031023 C9 - x40-2	2.58454	5.52922	3.2262	5.52922	2.42125	3.7541	0.309962	0.309962	1.05648	2.64	0.725275	0.00606667	0.0766667	2	22.3131	1.0386	0.0010002	0.230464	2.04629	2.18358
E7 WT T0 controle du 031023 C9 - x40-20	2.48128	4.9095	5.99873	4.9095	2.46977	2.7284	0.166702	0.166702	0.873369	1.72152	0.632558	0.00716667	0.268333	1.42857	29.6569	1.07184	0.00119613	0.513387	9.22387	14.5871
E7 WT T0 controle du 031023 C9 - x40-21	2.25906	3.80124	5.18805	3.80124	2.49355	2.09333	0.192751	0.192751	0.869607	1.77041	0.639042	0.00603333	0.143333	2.33333	22.317	1.03651	0.0009918	0.687965	1.34456	8.90568
E7 WT T0 controle du 031023 C9 - x40-22	2.66571	6.07087	7.34557	6.07087	2.92629	3.50857	0.136136	0.136136	0.988639	3.87425	0.79484	0.00904444	0.226667	0.928571	44.1437	1.09457	0.00149876	0.0495682	5.68342	5.84717
E7 WT T0 controle du 031023 C9 - x40-3	2.27744	3.88254	3.59607	3.88254	2.14136	2.44545	0.278081	0.278081	0.921699	1.93846	0.659686	0.00424444	0.0616667	4	6.34921	0.95877	0.000712679	0.409316	1.754	6.0735
E7 WT T0 controle du 031023 C9 - x40-4	2.73353	6.56391	2.85134	6.56391	2.51283	3.78846	0.350712	0.350712	0.914919	2.14386	0.68192	0.0199111	0.135	1.13333	65.5393	1.23924	0.00398061	0.118114	1.16155	4.09163
E7 WT T0 controle du 031023 C9 - x40-5	2.9775	8.69253	6.64972	8.69253	3.74689	4.74312	0.150382	0.150382	1.05622	4.41346	0.815275	0.0125111	0.35	1.46667	83.5828	1.16183	0.00190858	0.208607	2.30227	2.5212
E7 WT T0 controle du 031023 C9 - x40-6	2.68005	6.17194	3.98966	6.17194	2.63658	3.80357	0.250648	0.250648	1.00067	3.53723	0.779601	0.00947778	0.301667	1.15385	54.8586	1.11332	0.00163585	0.171197	2.31298	2.69603
E7 WT T0 controle du 031023 C9 - x40-7	2.77324	6.87093	6.1318	6.87093	2.94012	4.21311	0.163084	0.163084	1.05141	4.41622	0.815369	0.0111333	0.186667	1.16667	47.9853	1.11728	0.00193312	0.21192	3.5156	4.06429
E7 WT T0 controle du 031023 C9 - x40-8	2.78518	6.96599	3.27594	6.96599	2.80909	4.11558	0.305256	0.305256	0.990219	3.28016	0.766364	0.0122222	0.181667	1.4	47.4496	1.13761	0.00216093	0.193061	1.7962	1.89803
E7 WT T0 controle du 031023 C9 - x40-9	2.8305	7.33913	9.49432	7.33913	3.06052	3.84186	0.105326	0.105326	0.915786	3.36364	0.770833	0.0112	0.943333	0.6	68.0824	1.12326	0.0018394	0.567821	8.62895	11.9428
E8 WT T0 controle du 031023 C1 - x40-10	2.84331	7.44822	5.27194	7.44822	3.69633	3.84146	0.189683	0.189683	0.991585	3.6413	0.784543	0.0142333	0.351667	1.75	56.8368	1.16562	0.00240826	0.150461	2.36329	2.48227
E8 WT T0 controle du 031023 C1 - x40-2	3.07149	9.68592	4.58859	9.68592	3.81814	5.55678	0.217932	0.217932	1.12101	4.24731	0.809426	0.0216889	0.656667	2.05	92.357	1.27002	0.00380181	0.160046	1.06187	1.24131
E8 WT T0 controle du 031023 C1 - x40-3	3.11939	10.235	13.6735	10.235	4.06243	5.10968	0.0731339	0.0731339	1.00623	9.70787	0.906611	0.0211778	1.37	1.31818	99.1875	1.24585	0.00346255	0.476631	1.76842	1.83138
E8 WT T0 controle du 031023 C1 - x40-4	2.62287	5.77868	4.12555	5.77868	2.17737	3.98077	0.242392	0.242392	1.01649	2.41636	0.707291	0.0102111	0.145	0.692308	40.3754	1.10997	0.00186616	0.368805	7.2353	7.66665
E8 WT T0 controle du 031023 C1 - x40-5	2.67873	6.16253	5.14125	6.16253	3.83392	3.20961	0.194505	0.194505	1.0198	3.16176	0.759717	0.0125778	0.476667	3	29.3965	1.13384	0.00224339	0.479251	1.00744	1.4796
E8 WT T0 controle du 031023 C1 - x40-6	2.91295	8.06992	6.93255	8.06992	3.76592	4.35361	0.144247	0.144247	1.04693	5.408	0.843945	0.0178	0.695	1.2381	81.0362	1.22141	0.00311605	0.339824	1.43048	1.77001
E8 WT T0 controle du 031023 C1 - x40-7	2.86891	7.67098	5.23567	7.67098	3.07581	4.36207	0.190998	0.190998	0.997291	3.82578	0.79278	0.0153889	0.246667	0.85	71.9135	1.18055	0.00274158	0.120168	2.81805	2.9219
E8 WT T0 controle du 031023 C1 - x40-8	2.90245	7.97299	105.686	7.97299	12.6831	2.06175	0.009462	0.009462	0.920933	16.6447	0.943326	0.0149	1.735	1.41176	68.3289	1.17581	0.00227691	0.79615	13.1375	13.5763
E8 WT T0 controle du 031023 C1 - x40-9	2.80914	7.16089	11.7982	7.16089	3.22192	3.68421	0.0847589	0.0847589	0.923495	5.15169	0.837443	0.0121667	0.67	1.15385	58.6957	1.12989	0.00202115	0.446191	7.1196	7.11961
E8 WT T0 controle du 031023 C10 - x40-10	3.2128	11.3971	6.69922	11.3971	3.5157	6.29245	0.149271	0.149271	1.03522	6.45593	0.865879	0.0272556	0.481667	0.911111	186.272	1.29655	0.00462845	0.162783	1.20887	1.58458
E8 WT T0 controle du 031023 C10 - x40-11	2.75209	6.70567	5.99571	6.70567	2.67189	4.01538	0.166786	0.166786	0.978801	3.48347	0.776959	0.0120556	0.403333	1	61.6655	1.13232	0.00207874	0.322719	4.32706	4.78569
E8 WT T0 controle du 031023 C10 - x40-12	2.40405	4.49182	1.50443	4.49182	1.94118	3.33333	0.664703	0.664703	1.03393	1.16667	0.538462	0.00736667	0.0633333	1.125	21.2017	1.0682	0.00135193	0.194184	2.41014	2.8795
E8 WT T0 controle du 031023 C10 - x40-13	2.20061	3.55387	2.38555	3.55387	1.69275	2.46316	0.419191	0.419191	0.901753	1.51825	0.602899	0.00383333	0.0316667	1.66667	7.3125	0.977794	0.000665148	0.327485	1.57701	5.9275
E8 WT T0 controle du 031023 C10 - x40-2	3.22826	11.6018	19.0384	11.6018	4.48405	5.09115	0.0525254	0.0525254	0.929234	7.49402	0.88227	0.0236889	1.95	1.61538	119.949	1.28282	0.00377533	0.530938	2.90969	4.10026
E8 WT T0 controle du 031023 C10 - x40-3	3.11211	10.1496	7.49045	10.1496	4.33773	4.97966	0.133503	0.133503	1.02184	4.76817	0.826635	0.0185222	0.646667	0.923077	99.3469	1.21721	0.00302553	0.343768	1.46612	2.03977
E8 WT T0 controle du 031023 C10 - x40-4	2.63566	5.86445	4.61422	5.86445	2.0712	4.10615	0.216721	0.216721	1.00767	5.72043	0.8512	0.0138889	0.613333	0.545455	53.2368	1.16565	0.0027386	0.707107	1.12828	2.55829
E8 WT T0 controle du 031023 C10 - x40-5	2.70214	6.33089	5.23733	6.33089	3.34262	3.13107	0.190937	0.190937	0.904213	2.97115	0.748184	0.00917778	0.295	2	41.9434	1.09331	0.00156625	0.143461	1.77853	4.03587
E8 WT T0 controle du 031023 C10 - x40-6	2.6859	6.21361	3.31603	6.21361	2.35654	4.06452	0.301565	0.301565	1.00416	3.75	0.789474	0.0130889	0.27	0.933333	52.043	1.16142	0.00241047	0.221892	2.00128	2.00164
E8 WT T0 controle du 031023 C10 - x40-7	2.27207	3.8586	5.51069	3.8586	2.49923	1.97175	0.181466	0.181466	0.80784	2.04206	0.671275	0.00723333	0.2	1.33333	27.6888	1.07745	0.00122266	0.123939	2.23052	13.3162
E8 WT T0 controle du 031023 C10 - x40-8	2.51313	5.09285	4.68551	5.09285	2.84858	2.76263	0.213424	0.213424	0.915536	2.97403	0.748366	0.0102	0.13	1.44444	31.0277	1.13094	0.0018446	0.339806	1.3616	4.5724
E8 WT T0 controle du 031023 C10 - x40-9	3.10124	10.0234	9.72082	10.0234	3.58676	5.1374	0.102872	0.102872	0.97069	6.03431	0.85784	0.0159444	0.648333	1.04167	101.226	1.19349	0.00259495	0.192182	1.29887	4.02481
E8 WT T0 controle du 031023 C2 - x40-10	2.96624	8.58054	9.92931	8.58054	3.88113	4.01141	0.100712	0.100712	0.921003	4.09746	0.803824	0.0133667	0.608333	1.83333	74.2751	1.16955	0.00207717	0.0644692	2.2122	6.41672
E8 WT T0 controle du 031023 C2 - x40-2	3.2669	12.1296	11.3513	12.1296	4.62211	5.82133	0.0880955	0.0880955	1.0318	9.50952	0.904848	0.0245222	1.20333	1.48837	167.872	1.30029	0.00373278	0.200814	1.14512	1.30421
E8 WT T0 controle du 031023 C2 - x40-3	2.7145	6.42164	6.1602	6.42164	3.57834	3.43662	0.162332	0.162332	1.01234	3.4	0.772727	0.0114889	0.373333	2.5	35.7459	1.12152	0.00195021	0.310985	3.09537	3.10588
E8 WT T0 controle du 031023 C2 - x40-4	3.02915	9.22512	7.08419	9.22512	4.03235	5.05093	0.141159	0.141159	1.09946	5.21788	0.839173	0.0123667	0.336667	1.16667	68.5321	1.14774	0.00185263	0.0670251	1.11974	1.55614
E8 WT T0 controle du 031023 C2 - x40-5	3.03505	9.28795	25.9694	9.28795	4.78202	3.94426	0.0385069	0.0385069	0.928649	5.23832	0.8397	0.0148333	1.57833	1.16667	79.2186	1.20307	0.00221217	0.455511	16.0048	16.9007
E8 WT T0 controle du 031023 C2 - x40-6	2.62464	5.79047	2.72022	5.79047	2.30429	4.21583	0.367617	0.367617	1.10519	2.62222	0.723926	0.00905556	0.188333	0.9	37.6288	1.11524	0.00161537	0.476439	1.17273	2.41923
E8 WT T0 controle du 031023 C2 - x40-7	2.92779	8.20901	6.07634	8.20901	3.4299	4.56938	0.164573	0.164573	1.03088	4.12857	0.805014	0.0119667	0.621667	4	53.316	1.16376	0.00188138	0.526018	1.467	1.74265
E8 WT T0 controle du 031023 C2 - x40-8	2.68125	6.18043	9.00125	6.18043	4.41503	2.8377	0.111096	0.111096	0.964749	3.13514	0.75817	0.0068	0.165	6	25.1379	1.05386	0.000987628	0.5	1.02796	3.96412
E8 WT T0 controle du 031023 C2 - x40-9	2.62034	5.76192	3.08483	5.76192	3.89211	2.89205	0.324167	0.324167	0.990217	1.68831	0.628019	0.0069	0.07	2.2	30.4641	1.048	0.00108524	0.204617	1.50711	1.7128
E8 WT T0 controle du 031023 C3 - x40-10	3.03896	9.32989	8.42047	9.32989	3.99778	4.54104	0.118758	0.118758	0.973171	3.68512	0.786558	0.0150444	0.89	1.5	84.507	1.1865	0.00236709	0.369638	2.93507	3.02496
E8 WT T0 controle du 031023 C3 - x40-11	2.84483	7.46124	13.196	7.46124	4.43735	3.38667	0.0757803	0.0757803	0.956144	3.58564	0.781928	0.00922222	0.41	1.33333	49.923	1.09645	0.00144999	0.173553	10.6825	10.9286
E8 WT T0 controle du 031023 C3 - x40-2	2.85076	7.51233	7.70579	7.51233	3.65961	3.54032	0.129773	0.129773	0.901541	4.12736	0.804968	0.0120778	0.535	1.54545	65.2811	1.1449	0.00190062	0.203466	1.08899	2.70793
E8 WT T0 controle du 031023 C3 - x40-3	2.2496	3.76006	3.08154	3.76006	1.98361	2.45192	0.324513	0.324513	0.918417	1.65217	0.622951	0.00406667	0.0233333	1	10.9649	0.999158	0.000662041	0.233762	1.82244	6.48982
E8 WT T0 controle du 031023 C3 - x40-4	1.96287	2.70291	1.11397	2.70291	1.41104	2.1358	0.897692	0.897692	0.93864	0.884393	0.469325	0.00362222	0.0166667	2	5.88235	0.971755	0.000650842	0.0553849	1.14754	3.10273
E8 WT T0 controle du 031023 C3 - x40-5	2.77563	6.88989	19.926	6.88989	2.81202	3.81564	0.0501856	0.0501856	0.928677	12.7193	0.92711	0.00868889	0.401667	2.42857	29.8055	1.11296	0.00137813	0.226166	1.73513	5.24724
E8 WT T0 controle du 031023 C3 - x40-6	2.99582	8.87781	15.5486	8.87781	4.54545	4.07937	0.0643144	0.0643144	0.97966	5.31361	0.841612	0.0118556	0.58	3	59.422	1.14677	0.0017878	0.489821	3.40117	5.11869
E8 WT T0 controle du 031023 C3 - x40-7	2.46515	4.81912	0.931095	4.81912	2.26562	3.56522	1.074	1.074	1.11356	0.96587	0.491319	0.0064	0.00833333	1	23.1837	1.09252	0.00115523	0	1.21499	1.30756
E8 WT T0 controle du 031023 C3 - x40-8	2.97335	8.65109	9.46004	8.65109	4.22898	4.58203	0.105708	0.105708	1.08919	5.61991	0.848941	0.0162556	0.578333	1.69231	74.409	1.20835	0.00258814	0.0739474	1.63049	1.72544
E8 WT T0 controle du 031023 C3 - x40-9	2.75384	6.71917	7.18986	6.71917	5.44352	2.87417	0.139085	0.139085	0.998015	4.0687	0.802711	0.0147556	0.546667	2.25	43.363	1.17728	0.00263078	0.631741	3.26688	3.55398
E8 WT T0 controle du 031023 C4 - x40-1	2.74325	6.63775	7.06712	6.63775	2.82278	4.02985	0.1415	0.1415	1.02002	5.44022	0.844726	0.0131667	0.561667	1.08333	58.023	1.17496	0.00226684	0.62169	3.7338	3.75008
E8 WT T0 controle du 031023 C4 - x40-10	2.93333	8.26151	4.5413	8.26151	4.22428	4.09362	0.220201	0.220201	1.01841	3.26482	0.765524	0.0119889	0.403333	0.875	62.9346	1.12974	0.0018763	0.40957	1.14648	1.15168
E8 WT T0 controle du 031023 C4 - x40-11	2.80379	7.1169	9.80425	7.1169	4.17298	3.73684	0.101997	0.101997	1.0726	4.91045	0.830808	0.0088	0.625	1.16667	38.9058	1.0753	0.0013392	0.798515	2.17613	2.38542
E8 WT T0 controle du 031023 C4 - x40-12	2.82031	7.25355	7.7525	7.25355	3.84739	3.47619	0.128991	0.128991	0.940019	3.50279	0.777916	0.00895556	0.27	2.8	33.9968	1.10058	0.00136251	0.157524	1.04558	2.5193
E8 WT T0 controle du 031023 C4 - x40-2	2.54286	5.27018	1.88455	5.27018	2.12118	3.68276	0.530631	0.530631	1.01774	2.05993	0.673195	0.00907778	0.155	2.16667	22	1.11407	0.00166571	0.300957	1.5971	1.62438
E8 WT T0 controle du 031023 C4 - x40-3	2.62662	5.80371	3.14212	5.80371	2.20789	3.99485	0.318256	0.318256	1.02278	3.63725	0.784355	0.0157667	0.213333	0.846154	37.7583	1.17433	0.00307293	0.106186	1.1272	2.14203
E8 WT T0 controle du 031023 C4 - x40-4	2.99119	8.83058	8.04137	8.83058	3.60458	4.1963	0.124357	0.124357	0.902203	3.96212	0.798473	0.0145556	0.643333	1.72222	83.1979	1.20045	0.00233747	0.455668	1.02027	5.86319
E8 WT T0 controle du 031023 C4 - x40-5	2.95778	8.49739	5.38115	8.49739	3.89565	4.32046	0.185834	0.185834	1.00354	4.72614	0.825362	0.0153333	0.396667	1.21053	88.2256	1.20411	0.00250833	0.373972	1.6593	1.72416
E8 WT T0 controle du 031023 C4 - x40-6	3.0519	9.46988	3.13424	9.46988	2.77804	5.74167	0.319057	0.319057	1.01056	3.38802	0.772107	0.0187222	0.301667	1.10526	86.2606	1.22144	0.00334763	0.142049	1.66664	1.67531
E8 WT T0 controle du 031023 C4 - x40-7	2.92332	8.16682	4.51196	8.16682	4.12523	4.0819	0.221633	0.221633	1.01516	3.19608	0.761682	0.0118889	0.363333	0.842105	68.3387	1.12851	0.00186033	0.368122	1.16171	1.18952
E8 WT T0 controle du 031023 C4 - x40-8	3.02193	9.1487	12.9008	9.1487	4.95779	4.125	0.0775145	0.0775145	1.00394	5.67785	0.850251	0.0110556	0.281667	3.33333	53.1253	1.14306	0.00162555	0.202993	1.49351	3.05429
E8 WT T0 controle du 031023 C5 - x40-10	2.54242	5.2675	4.25943	5.2675	2.78624	3.03106	0.234773	0.234773	0.960502	2.79444	0.736457	0.00758889	0.173333	4.25	25.837	1.09564	0.00126237	0.216454	1.2692	3.83021
E8 WT T0 controle du 031023 C5 - x40-11	2.88012	7.77057	8.86317	7.77057	3.57637	4.34211	0.112826	0.112826	1.05674	3.15278	0.759197	0.00996667	0.605	2.71429	43.442	1.09403	0.00155937	0.887169	6.09956	7.08121
E8 WT T0 controle du 031023 C5 - x40-12	2.95378	8.45831	18.177	8.45831	3.16447	4.36614	0.0550146	0.0550146	0.918259	7.19162	0.877924	0.0152	0.77	1.05	74.4388	1.18908	0.00253246	0.0604564	11.9109	13.1337
E8 WT T0 controle du 031023 C5 - x40-13	2.02302	2.8967	3.03395	2.8967	1.58709	2.36607	0.329604	0.329604	1.02902	2.94083	0.746246	0.0074	0.116667	0.6	19.3239	1.11264	0.0013983	0.516979	2.14073	4.26801
E8 WT T0 controle du 031023 C5 - x40-14	2.93288	8.25724	16.0946	8.25724	4.01132	4.23556	0.0621327	0.0621327	1.02735	8.21739	0.891509	0.0117778	1.06833	2.625	58.9376	1.16261	0.0017489	1.0662	1.44239	3.17051
E8 WT T0 controle du 031023 C5 - x40-15	2.61953	5.75652	4.85508	5.75652	2.64673	3.4963	0.20597	0.20597	0.988104	3.4958	0.77757	0.00594444	0.085	1.6	16.5601	1.03991	0.000952167	0.259403	2.02173	3.57003
E8 WT T0 controle du 031023 C5 - x40-2	2.58981	5.5629	3.696	5.5629	2.71429	3.47283	0.270563	0.270563	1.02851	2.36538	0.702857	0.0116667	0.313333	2.66667	27.7087	1.14215	0.0020738	0.381725	1.06902	3.07061
E8 WT T0 controle du 031023 C5 - x40-3	2.8496	7.5023	15.1894	7.5023	5.48406	3.02344	0.0658354	0.0658354	0.943752	4.42949	0.815821	0.00941111	0.33	1.75	47.9363	1.10227	0.00135768	0.206162	2.5912	2.98587
E8 WT T0 controle du 031023 C5 - x40-4	2.3283	4.11665	6.92027	4.11665	3.24727	2.24074	0.144503	0.144503	0.98086	1.37069	0.578182	0.00305556	0.121667	1.5	15.7233	0.956167	0.000427219	0.772246	10.2627	10.432
E8 WT T0 controle du 031023 C5 - x40-5	2.37164	4.32727	5.6421	4.32727	2.89529	2.55422	0.177239	0.177239	1.00436	2.2931	0.696335	0.00212222	0.0166667	0	8.69173	0.889141	0.000268392	0.228814	3.84791	4.89352
E8 WT T0 controle du 031023 C5 - x40-6	2.16697	3.41886	6.46026	3.41886	2.05825	2.19643	0.154793	0.154793	0.92169	2.55172	0.718447	0.00114444	0.03	2	7.78378	0.768813	0.00013256	0.892254	1.19519	12.1803
E8 WT T0 controle du 031023 C5 - x40-7	2.38588	4.39883	5.30523	4.39883	2.53247	2.72414	0.188493	0.188493	0.985516	3.27778	0.766234	0.00256667	0.0816667	0.833333	20.339	0.930852	0.000340474	0.354318	3.09786	3.09886
E8 WT T0 controle du 031023 C5 - x40-8	2.83053	7.3394	1.62901	7.3394	2.69825	4.82407	0.613869	0.613869	1.07968	1.41566	0.586035	0.0178222	0.323333	1.35294	70.2649	1.20734	0.00347414	0.149813	1.77796	2.2447
E8 WT T0 controle du 031023 C5 - x40-9	1.76851	2.16098	0.413391	2.16098	1.14371	2.29508	2.41902	2.41902	1.13581	0.330677	0.248503	0.00371111	0	0	0.192771	0.96077	0.000723326	0.0547176	1.27791	1.418
E8 WT T0 controle du 031023 C6 - x40-10	2.54724	5.29681	6.17941	5.29681	2.24009	3.39506	0.161828	0.161828	0.959327	5	0.833333	0.00953333	0.116667	0.533333	33.1692	1.12507	0.00172424	0.199065	1.76779	5.00477
E8 WT T0 controle du 031023 C6 - x40-2	2.8552	7.55088	6.10803	7.55088	3.08559	4.37295	0.163719	0.163719	1.01729	4.79927	0.827565	0.0176556	0.38	0.5	89.4669	1.2045	0.00312802	0.248343	2.85361	2.91715
E8 WT T0 controle du 031023 C6 - x40-3	2.89709	7.9239	10.8968	7.9239	3.72983	4.0051	0.0917701	0.0917701	0.976156	4.5	0.818182	0.00867778	0.238333	1.55556	45.7606	1.08773	0.00126242	0.182457	4.3841	4.66822
E8 WT T0 controle du 031023 C6 - x40-4	2.71716	6.44135	4.13865	6.44135	2.93899	3.87037	0.241624	0.241624	1.03009	2.19492	0.687003	0.00837778	0.205	3.66667	26.8803	1.10708	0.00137356	0.221521	2.64158	3.69829
E8 WT T0 controle du 031023 C6 - x40-5	3.01426	9.06824	5.93901	9.06824	4.54783	4.15976	0.168378	0.168378	0.978245	4.25549	0.809723	0.0212556	0.675	2.38095	104.328	1.25556	0.00358527	0.123124	1.30203	1.95966
E8 WT T0 controle du 031023 C6 - x40-6	2.81684	7.22463	9.38101	7.22463	3.82217	3.45089	0.106598	0.106598	0.933837	3.4439	0.774973	0.0101222	0.846667	1.5	42.8839	1.0965	0.00158931	0.589889	3.13336	3.4881
E8 WT T0 controle du 031023 C6 - x40-7	2.72024	6.46422	8.72144	6.46422	3.07592	3.40376	0.11466	0.11466	0.923486	4.38172	0.814186	0.0111222	0.465	1.11111	31.411	1.1269	0.00188147	0.698221	3.01022	3.06411
E8 WT T0 controle du 031023 C6 - x40-8	3.00966	9.02037	5.74459	9.02037	4.37842	4.37008	0.174077	0.174077	1.01373	3.19861	0.761826	0.0133889	0.535	2	82.9804	1.16106	0.00208536	0.155133	1.54746	2.43317
E8 WT T0 controle du 031023 C6 - x40-9	3.06192	9.57973	17.8712	9.57973	4.84747	4.41667	0.0559561	0.0559561	1.01508	7.20468	0.878118	0.0155889	0.985	2.16667	75.013	1.18678	0.00236754	0.374718	1.79181	4.57766
E8 WT T0 controle du 031023 C7 - x40-2	3.16556	10.7938	21.2759	10.7938	5.29792	4.5133	0.0470015	0.0470015	0.962436	9.57527	0.90544	0.0218556	1.35333	2.63158	93.4666	1.26305	0.00344556	0.411453	1.08833	4.18505
E8 WT T0 controle du 031023 C7 - x40-3	3.05157	9.46629	17.6038	9.46629	5.01024	4.10204	0.056806	0.056806	0.96995	5.53532	0.846985	0.0195333	1.16167	1.22222	121.306	1.24069	0.00302327	0.202375	2.23167	5.47021
E8 WT T0 controle du 031023 C7 - x40-4	2.93551	8.28231	10.4394	8.28231	3.47756	4.29474	0.095791	0.095791	0.966991	5.55849	0.847526	0.0193111	0.975	0.62963	85.5567	1.23778	0.00346289	0.418914	4.75507	4.87558
E8 WT T0 controle du 031023 C7 - x40-5	2.8342	7.37044	5.98348	7.37044	3.66819	3.97696	0.167127	0.167127	1.03344	4.37438	0.813932	0.0121222	0.366667	2	48.7207	1.15402	0.00208987	0.260437	2.28474	2.36652
E8 WT T0 controle du 031023 C8 - x40-1	2.93705	8.29699	5.92398	8.29699	3.77852	4.13149	0.168805	0.168805	0.967936	4.64384	0.822816	0.0183111	0.491667	0.909091	107.051	1.20157	0.00328639	0.0550816	2.26837	2.27888
E8 WT T0 controle du 031023 C8 - x40-10	2.91652	8.10318	12.7965	8.10318	4.45603	4.04237	0.0781461	0.0781461	1.05306	5.80864	0.853128	0.0122556	0.383333	1.125	50.5037	1.14682	0.00193339	0.40509	2.42512	2.81043
E8 WT T0 controle du 031023 C8 - x40-11	2.18128	3.47565	5.38154	3.47565	1.96491	1.94393	0.18582	0.18582	0.783998	1.08029	0.519298	0.00316667	0.0533333	0.5	10.277	0.945296	0.000476197	0.790292	10.6729	33.7819
E8 WT T0 controle du 031023 C8 - x40-12	2.34523	4.1977	3.022	4.1977	2.28802	2.54098	0.330907	0.330907	0.915629	1.19192	0.543779	0.00482222	0.02	0.5	15.2542	1.03205	0.000785299	0.240008	9.49547	9.56809
E8 WT T0 controle du 031023 C8 - x40-13	3.12545	10.3067	9.28169	10.3067	3.73222	4.68876	0.107739	0.107739	0.878862	4.24603	0.80938	0.0220333	0.878333	1.12	114.133	1.27043	0.00370809	0.157194	2.819	6.23291
E8 WT T0 controle du 031023 C8 - x40-14	2.60593	5.66706	5.20879	5.66706	2.73855	3.43429	0.191983	0.191983	1.00286	2.60887	0.722905	0.00994444	0.576667	1	45.1947	1.11202	0.0016619	0.630686	4.3432	5.17444
E8 WT T0 controle du 031023 C8 - x40-2	2.96078	8.52679	30.4267	8.52679	4.64113	3.27576	0.0328659	0.0328659	0.827633	5.69634	0.850665	0.0142111	1.09	1.38889	84.9412	1.19463	0.00212218	0.253205	2.7529	23.2918
E8 WT T0 controle du 031023 C8 - x40-3	2.87215	7.69966	9.57593	7.69966	3.43206	4.5	0.104428	0.104428	1.08273	3.80282	0.791789	0.0113667	0.853333	1.75	53.9272	1.15074	0.00179188	0.862491	5.64587	6.09201
E8 WT T0 controle du 031023 C8 - x40-5	2.85669	7.56377	6.62237	7.56377	3.79174	4.27103	0.151003	0.151003	1.09955	3.84167	0.79346	0.0129111	0.34	1.84615	52.0184	1.17383	0.00207998	0.265646	2.58721	2.59469
E8 WT T0 controle du 031023 C8 - x40-6	2.96664	8.58453	4.97262	8.58453	4.22331	4.32281	0.201101	0.201101	1.03485	3.10777	0.756559	0.0182111	1.12833	1.53846	81.5516	1.2146	0.00302174	0.629749	1.08441	1.48673
E8 WT T0 controle du 031023 C8 - x40-7	2.24933	3.75888	4.66138	3.75888	2.40525	2.20886	0.214529	0.214529	0.91136	1.64865	0.622449	0.00762222	0.18	2	15.3653	1.04674	0.00137582	0.497809	12.8882	15.2487
E8 WT T0 controle du 031023 C8 - x40-8	2.80288	7.1094	3.37431	7.1094	2.63067	4.06939	0.296357	0.296357	0.928387	1.49601	0.599361	0.0173889	0.52	0.857143	62.952	1.21155	0.00335404	0.0911412	2.52947	6.82311
E8 WT T0 controle du 031023 C8 - x40-9	2.72013	6.46336	1.52376	6.46336	1.96137	4.56118	0.656273	0.656273	0.988322	1.66906	0.625337	0.0247333	0.288333	0.65	106.483	1.25457	0.00540422	0.234109	1.40138	2.7498
E8 WT T0 controle du 031023 C9 - x40-10	2.19863	3.54575	2.36377	3.54575	1.90857	2.4	0.423053	0.423053	0.935099	0.951673	0.487619	0.00583333	0.03	1.25	14.0625	1.01374	0.00101841	0.525538	1.44121	6.82598
E8 WT T0 controle du 031023 C9 - x40-11	2.8424	7.44035	6.31109	7.44035	2.52724	4.74479	0.158451	0.158451	1.01379	7.06081	0.875943	0.0132556	0.33	0.72	66.1904	1.14959	0.00236134	0.14476	1.7635	2.22706
E8 WT T0 controle du 031023 C9 - x40-12	2.64855	5.95211	2.68133	5.95211	2.09607	4.05556	0.372949	0.372949	0.986467	3.65759	0.785297	0.0133	0.14	0.722222	57.2596	1.15849	0.00251792	0.266479	1.74276	1.76045
E8 WT T0 controle du 031023 C9 - x40-13	2.92694	8.20099	12.7272	8.20099	4.01389	3.99567	0.078572	0.078572	0.976126	6.75385	0.871032	0.0112	0.606667	1.78571	68.3656	1.13571	0.00173267	0.524215	2.7289	4.38541
E8 WT T0 controle du 031023 C9 - x40-14	2.73709	6.59081	9.44094	6.59081	4.48553	2.92105	0.105922	0.105922	0.938659	2.2434	0.691682	0.0122889	0.78	2	43.7765	1.14468	0.00203847	0.55932	8.25744	9.89445
E8 WT T0 controle du 031023 C9 - x40-15	2.6543	5.99166	5.0633	5.99166	3.16883	3.44615	0.1975	0.1975	1.02385	2.87984	0.742258	0.0111222	0.306667	0.9	38.4401	1.1304	0.00190478	0.329987	1.34062	3.04928
E8 WT T0 controle du 031023 C9 - x40-16	2.43731	4.66712	3.2741	4.66712	2.03277	3.43609	0.305428	0.305428	1.04969	1.83643	0.647444	0.00847778	0.253333	0.555556	23.1761	1.06689	0.00154394	0.5655	5.37712	5.73692
E8 WT T0 controle du 031023 C9 - x40-17	2.87457	7.72114	18.4444	7.72114	3.21964	3.59216	0.0542171	0.0542171	0.834791	6.22581	0.861607	0.0124444	0.901667	0.684211	72.2238	1.15246	0.00202214	0.601338	3.61295	13.2571
E8 WT T0 controle du 031023 C9 - x40-18	3.12748	10.3308	4.76943	10.3308	3.34906	5.47213	0.209669	0.209669	0.96936	5.05539	0.834858	0.0230778	0.683333	0.729167	140.736	1.25437	0.00404244	0.288606	1.60201	1.62581
E8 WT T0 controle du 031023 C9 - x40-19	2.89663	7.91972	7.10513	7.91972	3.21842	4.2562	0.140743	0.140743	0.964126	5.0905	0.83581	0.0149556	0.713333	1.04167	84.872	1.20159	0.00245296	0.310777	1.10324	2.3472
E8 WT T0 controle du 031023 C9 - x40-2	3.13962	10.4762	7.06913	10.4762	3.90554	5.20275	0.14146	0.14146	0.981449	4.50331	0.818291	0.0184667	0.668333	1.7	126.636	1.23455	0.00287134	0.314128	1.52597	2.25092
E8 WT T0 controle du 031023 C9 - x40-20	2.98469	8.76472	13.9281	8.76472	3.78589	3.96727	0.0717975	0.0717975	0.88072	4.36087	0.813463	0.0137	0.543333	1	76.4995	1.20275	0.00214588	0.268666	1.33089	9.62842
E8 WT T0 controle du 031023 C9 - x40-21	2.82037	7.25407	7.94627	7.25407	2.99387	4.67204	0.125845	0.125845	1.1144	6.82192	0.872154	0.0126889	0.525	0.75	59.2861	1.16506	0.00215967	0.524363	2.33334	2.44853
E8 WT T0 controle du 031023 C9 - x40-22	2.82136	7.26229	5.47504	7.26229	3.26383	4.29648	0.182647	0.182647	1.06882	7.68504	0.884859	0.0122556	0.363333	1	60.0041	1.15769	0.00211231	0.217127	1.00746	1.01375
E8 WT T0 controle du 031023 C9 - x40-23	2.8748	7.72312	12.8209	7.72312	3.67483	4.02609	0.0779978	0.0779978	0.999329	5.69006	0.850524	0.0127111	0.745	1.5	50.6516	1.14132	0.00206497	0.549952	5.02083	5.06017
E8 WT T0 controle du 031023 C9 - x40-24	2.72264	6.48208	6.05819	6.48208	4.32213	2.98058	0.165066	0.165066	0.955951	3.4625	0.77591	0.00793333	0.133333	0	26.8664	1.07089	0.00126081	0.154303	1.66942	1.84062
E8 WT T0 controle du 031023 C9 - x40-25	2.06732	3.04827	1.51058	3.04827	1.46505	2.57895	0.661998	0.661998	1.02404	1.2381	0.553191	0.00365556	0.005	2	2.90659	0.968069	0.00065312	0.123278	2.4003	4.34264
E8 WT T0 controle du 031023 C9 - x40-26	2.51086	5.07957	6.06899	5.07957	2.37522	2.53586	0.164772	0.164772	0.769399	3.23574	0.763914	0.0123778	0.105	1	33.5617	1.16608	0.00234304	0.329572	1.5076	8.0239
E8 WT T0 controle du 031023 C9 - x40-27	2.93941	8.31955	8.46024	8.31955	3.91852	4.12851	0.1182	0.1182	0.982324	3.95918	0.798354	0.0135	0.46	4	65.9887	1.18128	0.00208863	0.06415	4.30659	4.308
E8 WT T0 controle du 031023 C9 - x40-28	1.88743	2.47804	0.970432	2.47804	1.27547	2.16667	1.03047	1.03047	0.98746	0.540698	0.350943	0.00294444	0.005	0	2.10753	0.915794	0.000519415	0	4.48632	4.63025
E8 WT T0 controle du 031023 C9 - x40-3	2.87827	7.75404	10.7776	7.75404	3.30442	4.2	0.0927849	0.0927849	0.984622	6.63514	0.869027	0.0125556	0.896667	1.15789	61.6253	1.16368	0.0021178	0.758433	3.39127	3.75766
E8 WT T0 controle du 031023 C9 - x40-4	2.95717	8.49141	6.83635	8.49141	3.28918	4.69266	0.146277	0.146277	1.00227	4.15625	0.806061	0.0128333	0.475	1.22222	65.5306	1.14164	0.00216654	0.335491	1.12612	2.85298
E8 WT T0 controle du 031023 C9 - x40-5	2.5472	5.29655	3.41713	5.29655	3.15449	3.17089	0.292643	0.292643	1.06329	2.80749	0.73736	0.00791111	0.148333	5.5	24.3219	1.07336	0.0013055	0.0838002	1.62742	1.94914
E8 WT T0 controle du 031023 C9 - x40-6	2.23182	3.68386	5.5944	3.68386	1.82609	2.31452	0.17875	0.17875	0.849019	3.16379	0.759834	0.00536667	0.06	0.666667	11.5123	1.00149	0.000935179	0.305234	1.15888	10.03
E8 WT T0 controle du 031023 C9 - x40-7	2.00465	2.83608	1.77797	2.83608	1.50158	2.29487	0.562438	0.562438	0.991548	1.28058	0.561514	0.00352222	0	0	2.47753	0.958063	0.0006114	0	1.65568	4.88798
E8 WT T0 controle du 031023 C9 - x40-8	2.60075	5.63338	3.24335	5.63338	2.55808	3.7973	0.308324	0.308324	1.07811	2.77143	0.734848	0.0088	0.256667	1.14286	30.8522	1.08483	0.00156046	0.445233	2.70779	2.70927
E8 WT T0 controle du 031023 C9 - x40-9	2.76687	6.82072	9.78195	6.82072	2.27381	4.36612	0.102229	0.102229	0.965255	4.46	0.81685	0.0121333	0.705	0.619048	58.278	1.13312	0.00205032	0.956949	5.87398	8.39694
