# Supplementary material for: MorphoCellSorter is an Andrews plot-based sorting approach to rank microglia according to their morphological features
Source: eLife. 2025 May 19;13:RP101630. doi: 10.7554/eLife.101630 (PMC12088675; doi:10.7554/eLife.101630)
Supplement: Figure 6—source data 2. [file elife-101630-fig6-data2.xlsx]

## Sheet: FINAL
Parameter	Condition	Mean	Std	p-value
Perimeter_Area	WT	2.6735	0.0867844	0.0815
	CCHS	2.80283	0.103572
Circularity	WT	0.173682	0.0196565	0.0745
	CCHS	0.150662	0.0177906
Roundness_Factor	WT	0.254593	0.0715546	0.181
	CCHS	0.191838	0.0325363
Ramification_Index	WT	6.45804	0.582355	0.0743
	CCHS	7.52019	0.930957
Solidity	WT	0.325849	0.0284724	0.554
	CCHS	0.307579	0.0247834
Convexity	WT	3.34351	0.28215	0.112
	CCHS	3.8625	0.55965
CH_Radii_Ratio	WT	2.50741	0.109601	0.528
	CCHS	2.4353	0.156509
Span_Ratio	WT	1.87142	0.0699806	0.526
	CCHS	1.81053	0.104743
CH_Circularity	WT	0.970771	0.00691336	0.593
	CCHS	0.974875	0.0132447
Processes_Soma_Ratio	WT	3.67494	0.661132	0.0643
	CCHS	4.69574	0.676821
Processes_Cell_Ratio	WT	0.732496	0.0428164	0.057
	CCHS	0.780444	0.0240292
Density	WT	0.0111958	0.00107681	0.272
	CCHS	0.0122185	0.00152295
Branching_Index	WT	0.464085	0.0897537	0.158
	CCHS	0.543234	0.110489
Endpoints_Branchpoints	WT	1.88178	0.338111	0.1135
	CCHS	1.52888	0.262292
Skeleton_Processes_Ratio	WT	46.1956	10.2935	0.0777
	CCHS	75.1601	32.7515
Fractal_Dimension	WT	1.11699	0.0168308	0.195
	CCHS	1.13653	0.0243422
Lacunarity	WT	0.00188839	0.000186173	0.48
	CCHS	0.00199782	0.0002624
Polarization_Index	WT	0.390244	0.0341389	0.372
	CCHS	0.372003	0.0299355
Linearity	WT	3.78755	0.366424	0.125
	CCHS	3.25672	0.491772
Inertia	WT	5.73343	0.345143	0.432
	CCHS	5.0924	0.694855
