# Supplementary material for: MorphoCellSorter is an Andrews plot-based sorting approach to rank microglia according to their morphological features
Source: eLife. 2025 May 19;13:RP101630. doi: 10.7554/eLife.101630 (PMC12088675; doi:10.7554/eLife.101630)
Supplement: Table 1—source data 1. — EM: Embryonic microglia, MC: Microglia in culture. [file elife-101630-table1-data1.xlsx]

## Sheet: Table 1
Table 1 - Supplement Table 1
Th	Sum RS experts 1 and 2					Threshold ranks					Sum ranks
	tMCAo	pMCAo	AD	EM	MC	tMCAo	pMCAo	AD	EM	MC
0.2	1.92325	1.88991	1.88553	1.79939	1.6033	4	1	9	8	7	29
0.3	1.91802	1.88962	1.89456	1.79939	1.6033	7	2	4	8	7	28
0.4	1.92867	1.87351	1.89725	1.83739	1.58851	2	7	2	4	9	24
0.5	1.93156	1.87709	1.88744	1.83482	1.71336	1	5	8	6	6	26
0.6	1.92711	1.88486	1.89392	1.8074	1.73788	3	3	7	7	4	24
0.7	1.92281	1.88062	1.89343	1.83975	1.72345	5	4	5	3	5	22
0.8	1.92097	1.87694	1.89516	1.84307	1.75794	6	6	3	1	2	18
0.9	1.90931	1.85789	1.89324	1.84219	1.76077	9	8	6	2	1	26
1	1.9095	1.84515	1.90011	1.83519	1.75138	8	9	1	5	3	26
